# Supplementary material for: Social complexity, life-history and lineage influence the molecular basis of castes in vespid wasps
Source: Nat Commun. 2023 Feb 24;14:1046. doi: 10.1038/s41467-023-36456-6 (PMC9958023; doi:10.1038/s41467-023-36456-6)
Supplement: Supplementary file 6 — Supplementary Data 3 [file 41467_2023_36456_MOESM6_ESM.xlsx]

## Sheet: Table of Orthogroup DEGs
	Agelaia_cajannensis	Angiopolybia_pallens	Brachygastra_mellifica	Metapolybia_cingulata	Mischocyttarus_basimacula	Polistes_canadensis_EMILY	Polybia_quadracincta	Vespa_crabro	Vespula_vulgaris	Nas	Sum DW	Sum UP	sum_same direction	sum_any_direction		Agelaia_cajannensis	Angiopolybia_pallens	Brachygastra_mellifica	Metapolybia_cingulata	Mischocyttarus_basimacula	Polistes_canadensis_EMILY	Polybia_quadracincta	Vespa_crabro	Vespula_vulgaris
OG0001418	DW	DW	UP	DW	DW	DW	DW	DW	DW	0	8	1	8	9	OG0001418	TRINITY_DN10411_c0_g1	TRINITY_DN19689_c3_g1	TRINITY_DN48178_c0_g1	TRINITY_DN22767_c6_g1	TRINITY_DN20074_c10_g1	TRINITY_DN18853_c7_g1	TRINITY_DN16688_c0_g2	TRINITY_DN4317_c1_g1	TRINITY_DN23653_c4_g2
OG0005731	NA	DW	UP	DW	DW	DW	DW	DW	DW	1	7	1	7	8	OG0005731		TRINITY_DN19390_c9_g4	TRINITY_DN42841_c3_g2	TRINITY_DN23278_c10_g2	TRINITY_DN23983_c6_g1	TRINITY_DN12266_c11_g4	TRINITY_DN19161_c4_g3	TRINITY_DN6806_c0_g1	TRINITY_DN19564_c4_g1
OG0001119	NA	NA	DW	DW	DW	DW	DW	DW	DW	2	7	0	7	7	OG0001119	TRINITY_DN13422_c0_g1	TRINITY_DN16002_c0_g1	TRINITY_DN48147_c0_g1	TRINITY_DN21225_c0_g1	TRINITY_DN18010_c0_g1	TRINITY_DN12366_c0_g1	TRINITY_DN17207_c0_g1	TRINITY_DN13622_c0_g1	TRINITY_DN23466_c0_g4
OG0008426	NA	UP	NA	UP	UP	UP	UP	UP	UP	2	0	7	7	7	OG0008426		TRINITY_DN20111_c0_g1		TRINITY_DN4938_c0_g1	TRINITY_DN23591_c6_g1	TRINITY_DN2577_c0_g1	TRINITY_DN5676_c0_g1	TRINITY_DN58232_c0_g1	TRINITY_DN17830_c0_g4
OG0004864	NA	UP	DW	UP	UP	UP	NA	UP	UP	2	1	6	6	7	OG0004864	TRINITY_DN51912_c1_g1	TRINITY_DN18834_c1_g1	TRINITY_DN41951_c4_g2	TRINITY_DN22058_c11_g1	TRINITY_DN18623_c3_g2	TRINITY_DN14726_c3_g2	TRINITY_DN16647_c1_g1	TRINITY_DN2585_c0_g2	TRINITY_DN17719_c0_g1
OG0004846	NA	UP	NA	UP	UP	NA	NA	UP	UP	4	0	5	5	5	OG0004846	TRINITY_DN5122_c1_g1	TRINITY_DN16643_c10_g5	TRINITY_DN41673_c2_g1	TRINITY_DN23805_c3_g1	TRINITY_DN23434_c4_g5	TRINITY_DN19341_c9_g1	TRINITY_DN21327_c9_g1	TRINITY_DN1403_c2_g2	TRINITY_DN19660_c3_g2
OG0000371	NA	NA	DW	UP	UP	NA	NA	UP	UP	4	1	4	4	5	OG0000371	TRINITY_DN2004_c11_g1	TRINITY_DN16624_c8_g1	TRINITY_DN45256_c0_g1	TRINITY_DN24849_c3_g5	TRINITY_DN22783_c8_g1	TRINITY_DN13806_c5_g1	TRINITY_DN17136_c1_g1	TRINITY_DN25031_c0_g2	TRINITY_DN22291_c10_g1
OG0001244	DW	NA	UP	DW	NA	NA	NA	DW	DW	4	4	1	4	5	OG0001244	TRINITY_DN36601_c0_g1	TRINITY_DN23211_c0_g1	TRINITY_DN8007_c0_g1	TRINITY_DN23298_c4_g1	TRINITY_DN35641_c0_g1	TRINITY_DN12759_c4_g3	TRINITY_DN28962_c0_g1	TRINITY_DN8734_c1_g2	TRINITY_DN19674_c13_g1
OG0001619	UP	DW	DW	NA	DW	NA	NA	DW	NA	4	4	1	4	5	OG0001619	TRINITY_DN278_c14_g1	TRINITY_DN11964_c0_g1	TRINITY_DN36656_c0_g1	TRINITY_DN7749_c0_g1	TRINITY_DN23592_c7_g1	TRINITY_DN17238_c6_g1	TRINITY_DN18410_c2_g1	TRINITY_DN34994_c0_g2	TRINITY_DN19532_c4_g7
OG0004383	NA	UP	NA	UP	UP	NA	NA	UP	DW	4	1	4	4	5	OG0004383	TRINITY_DN36716_c0_g1	TRINITY_DN7329_c0_g1	TRINITY_DN37961_c0_g2	TRINITY_DN19989_c0_g1	TRINITY_DN24210_c3_g3	TRINITY_DN9025_c0_g1	TRINITY_DN21980_c0_g1	TRINITY_DN12968_c1_g1	TRINITY_DN18395_c6_g1
OG0005673	NA	NA	DW	UP	DW	NA	NA	DW	DW	4	4	1	4	5	OG0005673		TRINITY_DN15615_c0_g2	TRINITY_DN43030_c5_g1	TRINITY_DN21966_c6_g2	TRINITY_DN21689_c2_g2	TRINITY_DN17309_c3_g2	TRINITY_DN13155_c0_g1		TRINITY_DN22883_c0_g1
OG0005840	NA	UP	NA	UP	UP	UP	NA	DW	NA	4	1	4	4	5	OG0005840	TRINITY_DN11205_c1_g1	TRINITY_DN16797_c1_g1	TRINITY_DN45044_c4_g1	TRINITY_DN24681_c1_g1	TRINITY_DN24146_c10_g3	TRINITY_DN14231_c4_g1	TRINITY_DN20313_c4_g1		TRINITY_DN23100_c2_g3
OG0006790	NA	UP	DW	UP	UP	NA	NA	NA	UP	4	1	4	4	5	OG0006790	TRINITY_DN54950_c1_g1	TRINITY_DN3263_c0_g1	TRINITY_DN38778_c0_g1	TRINITY_DN17755_c0_g1	TRINITY_DN16821_c0_g1		TRINITY_DN10799_c0_g1	TRINITY_DN2367_c7_g2	TRINITY_DN18659_c12_g1
OG0007632	NA	DW	UP	DW	DW	NA	NA	DW	NA	4	4	1	4	5	OG0007632	TRINITY_DN18969_c0_g1	TRINITY_DN18702_c1_g3	TRINITY_DN38542_c0_g1	TRINITY_DN15181_c0_g1	TRINITY_DN23429_c6_g3	TRINITY_DN13595_c1_g1			TRINITY_DN17894_c0_g1
OG0001855	NA	NA	DW	UP	UP	NA	UP	NA	DW	4	2	3	3	5	OG0001855	TRINITY_DN9841_c0_g1		TRINITY_DN40719_c0_g1	TRINITY_DN24725_c5_g1	TRINITY_DN17448_c0_g1	TRINITY_DN14475_c4_g1	TRINITY_DN7757_c0_g1	TRINITY_DN4520_c0_g4	TRINITY_DN19991_c2_g1
OG0002401	NA	NA	UP	DW	UP	NA	UP	NA	DW	4	2	3	3	5	OG0002401	TRINITY_DN40049_c0_g1	TRINITY_DN14477_c0_g1	TRINITY_DN40364_c2_g1	TRINITY_DN23286_c0_g1	TRINITY_DN18633_c12_g2	TRINITY_DN25887_c0_g1	TRINITY_DN29992_c0_g1	TRINITY_DN28510_c6_g1	TRINITY_DN18783_c7_g1
OG0003095	UP	NA	UP	NA	NA	DW	DW	DW	NA	4	3	2	3	5	OG0003095	TRINITY_DN13296_c0_g1	TRINITY_DN15660_c0_g1	TRINITY_DN18162_c0_g1	TRINITY_DN22755_c5_g1	TRINITY_DN19521_c1_g1	TRINITY_DN12947_c0_g1	TRINITY_DN17471_c0_g1	TRINITY_DN4317_c1_g5	TRINITY_DN20744_c7_g1
OG0006489	NA	NA	UP	DW	NA	UP	NA	DW	DW	4	3	2	3	5	OG0006489	TRINITY_DN3330_c1_g2	TRINITY_DN15851_c0_g1	TRINITY_DN43261_c11_g1	TRINITY_DN22604_c8_g1	TRINITY_DN22453_c4_g1	TRINITY_DN11996_c0_g1	TRINITY_DN32760_c0_g1		TRINITY_DN19031_c2_g2
OG0006624	UP	DW	NA	UP	NA	NA	NA	DW	DW	4	3	2	3	5	OG0006624	TRINITY_DN42906_c0_g1	TRINITY_DN30649_c0_g1		TRINITY_DN2988_c0_g1	TRINITY_DN17924_c0_g1	TRINITY_DN11331_c0_g1	TRINITY_DN47045_c0_g1		TRINITY_DN20566_c2_g2
OG0006727	NA	NA	DW	UP	NA	NA	DW	UP	UP	4	2	3	3	5	OG0006727	TRINITY_DN49376_c1_g1		TRINITY_DN23048_c0_g1	TRINITY_DN16517_c0_g2		TRINITY_DN13231_c6_g1	TRINITY_DN16712_c0_g1	TRINITY_DN19115_c0_g2	TRINITY_DN17952_c0_g1
OG0000435	NA	NA	NA	UP	UP	NA	NA	UP	UP	5	0	4	4	4	OG0000435	TRINITY_DN17057_c6_g1	TRINITY_DN25506_c0_g1	TRINITY_DN74901_c0_g1	TRINITY_DN21455_c5_g2	TRINITY_DN21835_c10_g1	TRINITY_DN36877_c0_g1	TRINITY_DN21061_c1_g1	TRINITY_DN15671_c0_g3	TRINITY_DN16869_c0_g1
OG0000851	NA	NA	NA	DW	NA	DW	DW	NA	DW	5	4	0	4	4	OG0000851		TRINITY_DN2748_c0_g2	TRINITY_DN12919_c0_g1	TRINITY_DN6864_c0_g1	TRINITY_DN3645_c0_g1	TRINITY_DN15237_c2_g1	TRINITY_DN15530_c0_g1	TRINITY_DN13805_c0_g1	TRINITY_DN21564_c6_g1
OG0001441	NA	NA	NA	DW	DW	NA	NA	DW	DW	5	4	0	4	4	OG0001441	TRINITY_DN11567_c1_g1	TRINITY_DN15396_c0_g2	TRINITY_DN40057_c0_g1	TRINITY_DN14787_c0_g1	TRINITY_DN19336_c4_g1	TRINITY_DN12127_c0_g1	TRINITY_DN16181_c0_g1	TRINITY_DN20787_c0_g1	TRINITY_DN19322_c7_g1
OG0002064	NA	NA	NA	UP	UP	NA	UP	UP	NA	5	0	4	4	4	OG0002064	TRINITY_DN15490_c0_g1	TRINITY_DN17901_c7_g1	TRINITY_DN43214_c2_g1	TRINITY_DN24122_c8_g2	TRINITY_DN19453_c8_g4	TRINITY_DN16972_c6_g6	TRINITY_DN19111_c7_g1	TRINITY_DN5474_c0_g3	TRINITY_DN20304_c2_g1
OG0002164	NA	UP	NA	UP	UP	NA	NA	UP	NA	5	0	4	4	4	OG0002164	TRINITY_DN21022_c4_g1	TRINITY_DN21447_c0_g1	TRINITY_DN9552_c0_g1	TRINITY_DN39129_c0_g1	TRINITY_DN21503_c7_g1		TRINITY_DN14832_c0_g2	TRINITY_DN10750_c1_g1	TRINITY_DN19829_c5_g1
OG0002584	UP	NA	UP	UP	UP	NA	NA	NA	NA	5	0	4	4	4	OG0002584	TRINITY_DN7468_c1_g2	TRINITY_DN17118_c3_g7	TRINITY_DN47498_c11_g2	TRINITY_DN23459_c3_g5	TRINITY_DN20874_c4_g1	TRINITY_DN18594_c2_g1	TRINITY_DN17792_c2_g1	TRINITY_DN1381_c11_g3	TRINITY_DN23317_c3_g1
OG0005524	NA	NA	NA	UP	UP	NA	NA	UP	UP	5	0	4	4	4	OG0005524	TRINITY_DN8_c0_g1	TRINITY_DN18427_c7_g1	TRINITY_DN22694_c0_g1	TRINITY_DN21331_c3_g1	TRINITY_DN20918_c5_g1	TRINITY_DN6200_c0_g1	TRINITY_DN18698_c11_g1	TRINITY_DN3946_c0_g1	TRINITY_DN20212_c1_g1
OG0005597	NA	UP	NA	UP	UP	NA	NA	UP	NA	5	0	4	4	4	OG0005597	TRINITY_DN9557_c0_g1	TRINITY_DN7596_c0_g1	TRINITY_DN8563_c0_g1	TRINITY_DN21355_c1_g1	TRINITY_DN20390_c5_g1	TRINITY_DN23358_c0_g1	TRINITY_DN7912_c0_g2	TRINITY_DN4173_c2_g3	TRINITY_DN18396_c12_g1
OG0000626	NA	NA	UP	DW	DW	NA	NA	NA	DW	5	3	1	3	4	OG0000626	TRINITY_DN26142_c2_g1	TRINITY_DN2965_c0_g1	TRINITY_DN43919_c1_g1	TRINITY_DN20623_c0_g3	TRINITY_DN27746_c0_g1	TRINITY_DN12984_c3_g1		TRINITY_DN54268_c2_g1	TRINITY_DN20121_c6_g1
OG0001457	NA	NA	UP	DW	NA	NA	NA	DW	DW	5	3	1	3	4	OG0001457	TRINITY_DN12570_c1_g1	TRINITY_DN29834_c0_g1	TRINITY_DN39756_c0_g2	TRINITY_DN11149_c0_g1		TRINITY_DN24219_c0_g1		TRINITY_DN15212_c1_g1	TRINITY_DN22760_c1_g2
OG0001707	NA	NA	NA	NA	UP	NA	UP	UP	DW	5	1	3	3	4	OG0001707	TRINITY_DN461_c1_g1	TRINITY_DN18635_c4_g1	TRINITY_DN48636_c4_g1	TRINITY_DN24702_c11_g1	TRINITY_DN25228_c3_g1	TRINITY_DN20608_c6_g1	TRINITY_DN20049_c5_g1	TRINITY_DN347_c1_g1	TRINITY_DN23579_c6_g1
OG0001758	NA	NA	UP	DW	DW	NA	NA	NA	DW	5	3	1	3	4	OG0001758	TRINITY_DN6030_c0_g2	TRINITY_DN19757_c10_g4	TRINITY_DN34482_c0_g2	TRINITY_DN22254_c9_g2	TRINITY_DN24346_c3_g1	TRINITY_DN18498_c5_g2	TRINITY_DN38074_c0_g1	TRINITY_DN308_c0_g2	TRINITY_DN18645_c5_g1
OG0001888	NA	NA	NA	DW	DW	UP	DW	NA	NA	5	3	1	3	4	OG0001888		TRINITY_DN19780_c5_g1	TRINITY_DN37771_c0_g1	TRINITY_DN15198_c0_g1	TRINITY_DN21191_c4_g1	TRINITY_DN12547_c4_g2	TRINITY_DN15775_c0_g1	TRINITY_DN65399_c1_g1	TRINITY_DN17922_c0_g2
OG0001952	NA	NA	DW	NA	UP	NA	NA	UP	UP	5	1	3	3	4	OG0001952	TRINITY_DN11339_c0_g1	TRINITY_DN17751_c9_g2	TRINITY_DN45054_c8_g1	TRINITY_DN22866_c6_g1	TRINITY_DN18899_c4_g3	TRINITY_DN18374_c6_g1	TRINITY_DN17748_c7_g1	TRINITY_DN25248_c0_g1	TRINITY_DN17738_c0_g1
OG0002181	NA	NA	UP	DW	NA	NA	NA	DW	DW	5	3	1	3	4	OG0002181	TRINITY_DN22053_c5_g1	TRINITY_DN3174_c0_g1	TRINITY_DN32235_c0_g1	TRINITY_DN20341_c0_g1	TRINITY_DN24095_c11_g2	TRINITY_DN11967_c0_g1	TRINITY_DN19786_c5_g1	TRINITY_DN8764_c0_g1	TRINITY_DN21520_c9_g2
OG0002210	NA	NA	UP	NA	DW	NA	NA	DW	DW	5	3	1	3	4	OG0002210	TRINITY_DN233_c0_g1	TRINITY_DN18222_c4_g8	TRINITY_DN43781_c5_g1	TRINITY_DN23885_c9_g7	TRINITY_DN21287_c5_g1		TRINITY_DN17798_c3_g16	TRINITY_DN1143_c0_g1	TRINITY_DN22613_c4_g3
OG0002643	UP	NA	NA	DW	DW	NA	NA	NA	DW	5	3	1	3	4	OG0002643	TRINITY_DN9113_c0_g1	TRINITY_DN18674_c2_g6	TRINITY_DN44707_c0_g1	TRINITY_DN21123_c0_g1	TRINITY_DN18062_c6_g2	TRINITY_DN14488_c6_g1	TRINITY_DN20349_c5_g1	TRINITY_DN1315_c1_g1	TRINITY_DN22714_c0_g2
OG0003084	NA	NA	UP	NA	NA	UP	NA	DW	UP	5	1	3	3	4	OG0003084	TRINITY_DN1318_c1_g2	TRINITY_DN18088_c9_g2	TRINITY_DN43888_c4_g1	TRINITY_DN21331_c5_g1	TRINITY_DN18997_c7_g1	TRINITY_DN14570_c2_g1	TRINITY_DN5575_c0_g1	TRINITY_DN20185_c0_g2	TRINITY_DN21659_c8_g2
OG0003662	NA	NA	UP	DW	DW	NA	NA	NA	DW	5	3	1	3	4	OG0003662	TRINITY_DN21174_c0_g1	TRINITY_DN6298_c0_g2	TRINITY_DN32720_c0_g1	TRINITY_DN16959_c0_g1	TRINITY_DN22295_c3_g4	TRINITY_DN7830_c0_g1	TRINITY_DN25770_c0_g1	TRINITY_DN422_c10_g1	TRINITY_DN18407_c8_g1
OG0003833	NA	UP	NA	UP	UP	NA	NA	DW	NA	5	1	3	3	4	OG0003833	TRINITY_DN23901_c1_g1	TRINITY_DN14868_c0_g1	TRINITY_DN39238_c0_g1	TRINITY_DN17240_c0_g1	TRINITY_DN15810_c0_g1	TRINITY_DN13590_c2_g1	TRINITY_DN12854_c0_g3	TRINITY_DN4153_c0_g4	TRINITY_DN22279_c5_g1
OG0005101	NA	DW	UP	NA	DW	NA	NA	NA	DW	5	3	1	3	4	OG0005101	TRINITY_DN6326_c2_g1	TRINITY_DN15651_c0_g1	TRINITY_DN38763_c0_g1	TRINITY_DN22416_c5_g1	TRINITY_DN24568_c2_g2	TRINITY_DN10960_c0_g1	TRINITY_DN29281_c0_g1	TRINITY_DN32069_c0_g1	TRINITY_DN22498_c5_g1
OG0005568	DW	NA	UP	NA	DW	NA	NA	DW	NA	5	3	1	3	4	OG0005568	TRINITY_DN9315_c2_g1	TRINITY_DN31356_c0_g1	TRINITY_DN42365_c14_g1	TRINITY_DN22226_c7_g1	TRINITY_DN19559_c5_g1	TRINITY_DN19092_c4_g3	TRINITY_DN15445_c0_g1		TRINITY_DN12648_c0_g1
OG0006421	UP	NA	DW	NA	NA	DW	NA	DW	NA	5	3	1	3	4	OG0006421	TRINITY_DN29849_c2_g1	TRINITY_DN15372_c0_g1	TRINITY_DN41126_c0_g1	TRINITY_DN20552_c0_g1	TRINITY_DN24325_c6_g2	TRINITY_DN11797_c0_g1	TRINITY_DN21390_c0_g1	TRINITY_DN889_c2_g1
OG0006623	NA	NA	DW	NA	UP	NA	NA	UP	UP	5	1	3	3	4	OG0006623	TRINITY_DN42889_c2_g1	TRINITY_DN16928_c2_g1	TRINITY_DN48209_c0_g1	TRINITY_DN28947_c0_g1	TRINITY_DN20506_c3_g1		TRINITY_DN9043_c0_g1	TRINITY_DN2637_c6_g1	TRINITY_DN21475_c3_g1
OG0006920	NA	NA	NA	UP	UP	NA	NA	DW	UP	5	1	3	3	4	OG0006920	TRINITY_DN6657_c1_g2		TRINITY_DN39901_c0_g1	TRINITY_DN21460_c4_g2	TRINITY_DN21982_c6_g1	TRINITY_DN20592_c6_g2	TRINITY_DN15118_c0_g1		TRINITY_DN20880_c1_g1
OG0008428	NA	NA	UP	UP	UP	NA	NA	DW	NA	5	1	3	3	4	OG0008428		TRINITY_DN24174_c0_g1	TRINITY_DN47552_c2_g1	TRINITY_DN19082_c0_g1	TRINITY_DN8565_c0_g2	TRINITY_DN13834_c4_g7	TRINITY_DN29395_c0_g1		TRINITY_DN19222_c5_g1
OG0001251	DW	DW	UP	NA	NA	NA	NA	NA	UP	5	2	2	2	4	OG0001251	TRINITY_DN3846_c10_g1	TRINITY_DN15033_c0_g1	TRINITY_DN42943_c6_g4	TRINITY_DN22750_c5_g1	TRINITY_DN18074_c0_g1	TRINITY_DN13090_c1_g4		TRINITY_DN10819_c0_g3	TRINITY_DN20218_c5_g4
OG0001704	UP	NA	UP	DW	DW	NA	NA	NA	NA	5	2	2	2	4	OG0001704	TRINITY_DN4571_c0_g2	TRINITY_DN36275_c0_g1	TRINITY_DN40102_c0_g1	TRINITY_DN23548_c6_g3	TRINITY_DN17948_c0_g1	TRINITY_DN21111_c5_g1	TRINITY_DN14412_c0_g3	TRINITY_DN23700_c0_g2	TRINITY_DN18589_c3_g1
OG0001896	NA	NA	UP	NA	UP	NA	NA	DW	DW	5	2	2	2	4	OG0001896		TRINITY_DN35073_c0_g1	TRINITY_DN18109_c0_g1	TRINITY_DN4156_c0_g1	TRINITY_DN22007_c7_g2	TRINITY_DN12841_c5_g3	TRINITY_DN41358_c0_g1	TRINITY_DN12613_c1_g1	TRINITY_DN23123_c8_g2
OG0002089	NA	NA	DW	UP	NA	NA	NA	UP	DW	5	2	2	2	4	OG0002089	TRINITY_DN1665_c2_g1	TRINITY_DN16189_c4_g6	TRINITY_DN39287_c0_g1	TRINITY_DN21313_c6_g1	TRINITY_DN18796_c6_g1	TRINITY_DN14644_c5_g1	TRINITY_DN19154_c2_g1	TRINITY_DN4981_c1_g2	TRINITY_DN19275_c6_g1
OG0002458	NA	DW	UP	NA	NA	NA	UP	NA	DW	5	2	2	2	4	OG0002458	TRINITY_DN49073_c0_g1	TRINITY_DN15037_c0_g1	TRINITY_DN45325_c3_g1	TRINITY_DN24610_c3_g2	TRINITY_DN19378_c3_g1	TRINITY_DN14428_c7_g2	TRINITY_DN21293_c0_g2	TRINITY_DN4783_c1_g1	TRINITY_DN17681_c0_g1
OG0002575	NA	NA	UP	NA	DW	UP	NA	NA	DW	5	2	2	2	4	OG0002575	TRINITY_DN7259_c0_g1	TRINITY_DN22471_c0_g1	TRINITY_DN45046_c5_g1	TRINITY_DN24366_c0_g1	TRINITY_DN18677_c10_g3	TRINITY_DN12001_c0_g1	TRINITY_DN20855_c8_g1	TRINITY_DN3089_c1_g2	TRINITY_DN17974_c1_g1
OG0002736	NA	NA	DW	UP	UP	NA	NA	NA	DW	5	2	2	2	4	OG0002736		TRINITY_DN39622_c0_g1	TRINITY_DN72449_c0_g1	TRINITY_DN20799_c0_g2	TRINITY_DN19730_c2_g1	TRINITY_DN6728_c0_g1	TRINITY_DN20986_c1_g2	TRINITY_DN15052_c0_g1	TRINITY_DN22398_c1_g2
OG0005148	NA	NA	DW	UP	DW	NA	NA	NA	UP	5	2	2	2	4	OG0005148	TRINITY_DN6574_c0_g2	TRINITY_DN16225_c2_g1	TRINITY_DN40782_c0_g1	TRINITY_DN20937_c0_g1	TRINITY_DN23120_c0_g1	TRINITY_DN17506_c4_g1	TRINITY_DN17629_c7_g1	TRINITY_DN3171_c0_g1	TRINITY_DN19227_c2_g1
OG0005696	NA	NA	NA	NA	UP	NA	UP	DW	DW	5	2	2	2	4	OG0005696		TRINITY_DN17245_c5_g2	TRINITY_DN47769_c4_g2	TRINITY_DN22154_c10_g1	TRINITY_DN17753_c0_g1	TRINITY_DN19757_c5_g1	TRINITY_DN18616_c6_g1		TRINITY_DN21457_c6_g4
OG0006213	DW	NA	NA	NA	DW	NA	NA	UP	UP	5	2	2	2	4	OG0006213	TRINITY_DN20672_c0_g2	TRINITY_DN15753_c0_g2	TRINITY_DN40678_c0_g1	TRINITY_DN20021_c0_g1	TRINITY_DN18860_c12_g2		TRINITY_DN13573_c0_g1	TRINITY_DN1176_c3_g4	TRINITY_DN20779_c4_g1
OG0008041	UP	NA	UP	DW	NA	NA	NA	DW	NA	5	2	2	2	4	OG0008041	TRINITY_DN552_c11_g1		TRINITY_DN45429_c5_g1	TRINITY_DN21878_c9_g1	TRINITY_DN18438_c3_g2	TRINITY_DN5782_c0_g1	TRINITY_DN13966_c0_g2		TRINITY_DN47260_c0_g1
OG0000783	NA	NA	NA	NA	DW	NA	NA	DW	DW	6	3	0	3	3	OG0000783	TRINITY_DN4391_c2_g1	TRINITY_DN18159_c6_g2	TRINITY_DN47124_c1_g1	TRINITY_DN23370_c10_g1	TRINITY_DN20038_c2_g2	TRINITY_DN15075_c1_g1	TRINITY_DN20028_c0_g1	TRINITY_DN582_c0_g2	TRINITY_DN23666_c2_g1
OG0000939	NA	NA	NA	NA	UP	UP	UP	NA	NA	6	0	3	3	3	OG0000939	TRINITY_DN2414_c0_g2	TRINITY_DN19462_c2_g2	TRINITY_DN48382_c3_g1	TRINITY_DN23545_c1_g1	TRINITY_DN23136_c0_g1	TRINITY_DN16715_c0_g2	TRINITY_DN18002_c7_g1	TRINITY_DN3254_c0_g1	TRINITY_DN23282_c1_g1
OG0000942	NA	NA	NA	NA	UP	NA	UP	UP	NA	6	0	3	3	3	OG0000942	TRINITY_DN2488_c0_g2	TRINITY_DN17167_c4_g2	TRINITY_DN44933_c0_g1	TRINITY_DN24472_c5_g1	TRINITY_DN21683_c4_g1	TRINITY_DN20588_c6_g1	TRINITY_DN16764_c0_g1	TRINITY_DN5176_c0_g1	TRINITY_DN20039_c0_g1
OG0001299	NA	NA	DW	NA	DW	NA	NA	DW	NA	6	3	0	3	3	OG0001299	TRINITY_DN940_c0_g2	TRINITY_DN18820_c11_g2	TRINITY_DN34235_c0_g1	TRINITY_DN24235_c3_g7	TRINITY_DN12594_c0_g1	TRINITY_DN13979_c6_g1	TRINITY_DN17947_c4_g2	TRINITY_DN5483_c3_g2	TRINITY_DN8087_c0_g1
OG0001729	NA	NA	NA	DW	NA	NA	NA	DW	DW	6	3	0	3	3	OG0001729	TRINITY_DN52186_c0_g1	TRINITY_DN40896_c0_g1	TRINITY_DN17714_c0_g1	TRINITY_DN1319_c0_g1	TRINITY_DN41285_c0_g1	TRINITY_DN9010_c0_g2	TRINITY_DN39943_c0_g1		TRINITY_DN20274_c5_g1
OG0001845	NA	NA	NA	NA	NA	DW	NA	DW	DW	6	3	0	3	3	OG0001845	TRINITY_DN9403_c3_g1	TRINITY_DN19203_c5_g4	TRINITY_DN46644_c1_g5	TRINITY_DN23472_c4_g3	TRINITY_DN24672_c4_g1	TRINITY_DN17704_c5_g1	TRINITY_DN19065_c4_g2	TRINITY_DN18296_c0_g1	TRINITY_DN18287_c4_g1
OG0002266	NA	NA	DW	NA	NA	NA	DW	DW	NA	6	3	0	3	3	OG0002266	TRINITY_DN2770_c1_g1	TRINITY_DN34543_c0_g1	TRINITY_DN39598_c0_g1	TRINITY_DN19538_c0_g1		TRINITY_DN16536_c5_g3	TRINITY_DN12329_c0_g1	TRINITY_DN5865_c1_g1	TRINITY_DN21741_c9_g2
OG0002389	NA	NA	NA	UP	UP	NA	UP	NA	NA	6	0	3	3	3	OG0002389	TRINITY_DN3876_c0_g3	TRINITY_DN19540_c3_g1	TRINITY_DN47903_c5_g1	TRINITY_DN23711_c7_g1	TRINITY_DN18449_c5_g3	TRINITY_DN19726_c4_g2	TRINITY_DN18401_c8_g4	TRINITY_DN28264_c0_g1	TRINITY_DN20303_c7_g1
OG0002524	NA	NA	DW	NA	DW	NA	NA	DW	NA	6	3	0	3	3	OG0002524	TRINITY_DN5914_c1_g2	TRINITY_DN17214_c2_g1	TRINITY_DN48167_c1_g2	TRINITY_DN24236_c8_g2	TRINITY_DN23235_c5_g5		TRINITY_DN20787_c4_g5		TRINITY_DN22440_c5_g4
OG0002733	NA	NA	NA	NA	DW	NA	NA	DW	DW	6	3	0	3	3	OG0002733		TRINITY_DN48424_c0_g1	TRINITY_DN94878_c0_g1	TRINITY_DN57385_c0_g1	TRINITY_DN19316_c3_g1	TRINITY_DN15961_c7_g3	TRINITY_DN20876_c0_g1		TRINITY_DN20881_c6_g1
OG0003061	NA	NA	NA	DW	NA	NA	NA	DW	DW	6	3	0	3	3	OG0003061	TRINITY_DN1298_c13_g1	TRINITY_DN16951_c5_g1	TRINITY_DN46825_c0_g1	TRINITY_DN21642_c6_g1	TRINITY_DN21097_c4_g1	TRINITY_DN16218_c8_g1	TRINITY_DN20631_c4_g1	TRINITY_DN2574_c0_g1	TRINITY_DN22430_c2_g1
OG0003830	NA	NA	NA	DW	NA	NA	NA	DW	DW	6	3	0	3	3	OG0003830	TRINITY_DN2385_c0_g1	TRINITY_DN15880_c0_g1	TRINITY_DN39198_c0_g1	TRINITY_DN20332_c0_g1	TRINITY_DN18138_c0_g1	TRINITY_DN6915_c0_g1	TRINITY_DN38146_c0_g1	TRINITY_DN24960_c0_g2	TRINITY_DN17789_c0_g1
OG0004501	NA	NA	UP	NA	NA	NA	NA	UP	UP	6	0	3	3	3	OG0004501	TRINITY_DN4004_c0_g1	TRINITY_DN19940_c0_g1	TRINITY_DN43952_c7_g1	TRINITY_DN23343_c4_g1	TRINITY_DN18542_c0_g3	TRINITY_DN8998_c0_g2	TRINITY_DN12273_c0_g1	TRINITY_DN14075_c1_g1	TRINITY_DN21640_c4_g1
OG0004534	UP	NA	NA	NA	UP	UP	NA	NA	NA	6	0	3	3	3	OG0004534	TRINITY_DN40972_c0_g1	TRINITY_DN33424_c0_g1	TRINITY_DN31177_c0_g1	TRINITY_DN24113_c2_g1	TRINITY_DN19116_c4_g1	TRINITY_DN4178_c0_g1	TRINITY_DN28980_c0_g1	TRINITY_DN16156_c0_g1	TRINITY_DN23701_c4_g2
OG0004899	NA	NA	UP	NA	UP	NA	NA	UP	NA	6	0	3	3	3	OG0004899	TRINITY_DN53200_c0_g1	TRINITY_DN46840_c0_g1	TRINITY_DN71231_c0_g1	TRINITY_DN8403_c0_g1	TRINITY_DN22230_c6_g1	TRINITY_DN31793_c0_g1	TRINITY_DN4417_c0_g1	TRINITY_DN2364_c10_g2	TRINITY_DN22181_c1_g5
OG0005111	NA	NA	UP	NA	NA	NA	UP	UP	NA	6	0	3	3	3	OG0005111	TRINITY_DN637_c0_g1	TRINITY_DN15706_c0_g1	TRINITY_DN46927_c7_g1	TRINITY_DN22013_c7_g1	TRINITY_DN21767_c5_g4	TRINITY_DN15836_c11_g1	TRINITY_DN43371_c0_g1	TRINITY_DN6345_c0_g3	TRINITY_DN23539_c1_g1
OG0005120	NA	DW	NA	DW	NA	NA	NA	DW	NA	6	3	0	3	3	OG0005120	TRINITY_DN641_c4_g2	TRINITY_DN20729_c0_g1	TRINITY_DN45087_c2_g1	TRINITY_DN51887_c0_g1	TRINITY_DN24750_c5_g1	TRINITY_DN20594_c0_g2			TRINITY_DN17874_c0_g1
OG0005718	NA	NA	UP	NA	UP	NA	NA	NA	UP	6	0	3	3	3	OG0005718		TRINITY_DN18664_c6_g4	TRINITY_DN46893_c3_g1	TRINITY_DN24671_c6_g1	TRINITY_DN20154_c1_g3	TRINITY_DN16710_c5_g1		TRINITY_DN5326_c1_g2	TRINITY_DN20680_c3_g1
OG0005893	NA	NA	NA	UP	UP	UP	NA	NA	NA	6	0	3	3	3	OG0005893	TRINITY_DN121_c5_g1	TRINITY_DN17087_c7_g1	TRINITY_DN42071_c3_g4	TRINITY_DN24772_c8_g2	TRINITY_DN18080_c2_g1	TRINITY_DN18277_c8_g2	TRINITY_DN15484_c0_g1	TRINITY_DN919_c1_g2
OG0005997	NA	DW	NA	NA	DW	NA	NA	DW	NA	6	3	0	3	3	OG0005997	TRINITY_DN14283_c0_g2	TRINITY_DN17683_c9_g1	TRINITY_DN43115_c0_g1	TRINITY_DN21860_c6_g1	TRINITY_DN24568_c2_g7	TRINITY_DN15018_c4_g1	TRINITY_DN18889_c2_g3		TRINITY_DN21326_c7_g2
OG0006515	NA	NA	NA	NA	DW	NA	NA	DW	DW	6	3	0	3	3	OG0006515	TRINITY_DN349_c5_g1	TRINITY_DN17171_c0_g1	TRINITY_DN39600_c0_g1		TRINITY_DN23012_c7_g1	TRINITY_DN19698_c6_g1	TRINITY_DN20324_c3_g1		TRINITY_DN22764_c0_g2
OG0006608	NA	DW	NA	DW	DW	NA	NA	NA	NA	6	3	0	3	3	OG0006608	TRINITY_DN4191_c1_g1	TRINITY_DN17414_c1_g1	TRINITY_DN44037_c7_g1	TRINITY_DN22247_c7_g3	TRINITY_DN22813_c4_g1	TRINITY_DN14227_c5_g1		TRINITY_DN542_c2_g2	TRINITY_DN18454_c6_g1
OG0006612	NA	NA	NA	UP	UP	NA	NA	UP	NA	6	0	3	3	3	OG0006612	TRINITY_DN41_c24_g1	TRINITY_DN18466_c4_g5	TRINITY_DN42868_c5_g2	TRINITY_DN24258_c2_g2	TRINITY_DN16069_c0_g2		TRINITY_DN18058_c5_g2	TRINITY_DN4134_c1_g2	TRINITY_DN18152_c0_g1
OG0006983	NA	NA	NA	NA	UP	NA	NA	UP	UP	6	0	3	3	3	OG0006983	TRINITY_DN7508_c1_g1	TRINITY_DN17497_c1_g1	TRINITY_DN40276_c0_g1		TRINITY_DN23590_c7_g1	TRINITY_DN20428_c7_g5	TRINITY_DN18800_c3_g1	TRINITY_DN55055_c0_g1	TRINITY_DN18314_c1_g1
OG0007266	NA	NA	NA	NA	DW	NA	NA	DW	DW	6	3	0	3	3	OG0007266		TRINITY_DN18262_c3_g1	TRINITY_DN42316_c4_g5	TRINITY_DN23792_c7_g1	TRINITY_DN18060_c4_g1	TRINITY_DN14555_c2_g1	TRINITY_DN18054_c5_g1	TRINITY_DN1080_c2_g4	TRINITY_DN23036_c7_g1
OG0008012	NA	NA	DW	NA	NA	NA	NA	DW	DW	6	3	0	3	3	OG0008012	TRINITY_DN5222_c6_g1		TRINITY_DN46955_c0_g2	TRINITY_DN23690_c11_g7	TRINITY_DN18362_c10_g1	TRINITY_DN20196_c4_g1	TRINITY_DN17690_c10_g2		TRINITY_DN22620_c1_g1
OG0008142	NA	NA	DW	NA	DW	NA	DW	NA	NA	6	3	0	3	3	OG0008142	TRINITY_DN7775_c0_g2		TRINITY_DN41346_c0_g1	TRINITY_DN23698_c9_g2	TRINITY_DN24824_c2_g1	TRINITY_DN20095_c7_g1	TRINITY_DN20008_c5_g1	TRINITY_DN1001_c0_g1
OG0000314	NA	NA	DW	NA	UP	NA	NA	NA	UP	6	1	2	2	3	OG0000314	TRINITY_DN1921_c1_g3	TRINITY_DN18886_c5_g1	TRINITY_DN48842_c1_g1	TRINITY_DN23808_c7_g1	TRINITY_DN25207_c6_g2	TRINITY_DN15879_c0_g2	TRINITY_DN21151_c4_g1	TRINITY_DN951_c2_g2	TRINITY_DN23875_c1_g1
OG0000466	NA	DW	UP	UP	NA	NA	NA	NA	NA	6	1	2	2	3	OG0000466	TRINITY_DN3110_c0_g1	TRINITY_DN16705_c2_g15	TRINITY_DN48092_c1_g1	TRINITY_DN22247_c9_g1	TRINITY_DN20815_c5_g2	TRINITY_DN13990_c7_g1	TRINITY_DN19553_c9_g2	TRINITY_DN2139_c1_g3	TRINITY_DN21936_c6_g6
OG0000485	NA	NA	UP	NA	NA	NA	NA	DW	DW	6	2	1	2	3	OG0000485	TRINITY_DN5483_c0_g1	TRINITY_DN19794_c4_g1	TRINITY_DN41572_c0_g1	TRINITY_DN24098_c12_g3	TRINITY_DN17740_c0_g2	TRINITY_DN13777_c7_g2	TRINITY_DN18566_c6_g2	TRINITY_DN17855_c0_g1	TRINITY_DN19055_c11_g1
OG0000556	NA	NA	UP	DW	NA	NA	NA	DW	NA	6	2	1	2	3	OG0000556	TRINITY_DN3746_c0_g1	TRINITY_DN15971_c0_g1	TRINITY_DN43958_c5_g1	TRINITY_DN21835_c0_g1	TRINITY_DN20814_c0_g1	TRINITY_DN21014_c2_g1	TRINITY_DN17479_c0_g1	TRINITY_DN1333_c6_g1	TRINITY_DN19583_c3_g2
OG0000607	NA	NA	UP	NA	DW	NA	UP	NA	NA	6	1	2	2	3	OG0000607	TRINITY_DN1747_c2_g2	TRINITY_DN18873_c1_g1	TRINITY_DN46466_c6_g2	TRINITY_DN22097_c5_g8	TRINITY_DN23168_c8_g2	TRINITY_DN14572_c4_g1	TRINITY_DN17846_c7_g1	TRINITY_DN3279_c0_g6	TRINITY_DN19465_c7_g5
OG0000645	NA	NA	DW	NA	UP	NA	NA	NA	DW	6	2	1	2	3	OG0000645	TRINITY_DN35419_c2_g1	TRINITY_DN19271_c8_g4	TRINITY_DN38921_c0_g2	TRINITY_DN29695_c0_g1	TRINITY_DN23227_c5_g10	TRINITY_DN25030_c0_g1	TRINITY_DN4765_c0_g1	TRINITY_DN19499_c0_g2	TRINITY_DN19937_c1_g1
OG0000646	NA	NA	UP	DW	NA	NA	NA	DW	NA	6	2	1	2	3	OG0000646	TRINITY_DN35597_c3_g1	TRINITY_DN18200_c4_g4	TRINITY_DN42643_c4_g2	TRINITY_DN21726_c4_g1	TRINITY_DN22186_c1_g1	TRINITY_DN6137_c0_g1	TRINITY_DN43158_c0_g1		TRINITY_DN23638_c3_g6
OG0000730	NA	NA	UP	NA	DW	NA	NA	UP	NA	6	1	2	2	3	OG0000730	TRINITY_DN6816_c0_g1	TRINITY_DN16038_c1_g1	TRINITY_DN53310_c0_g1	TRINITY_DN24203_c6_g2	TRINITY_DN17945_c0_g1	TRINITY_DN14003_c1_g5	TRINITY_DN38027_c0_g1	TRINITY_DN5723_c0_g2	TRINITY_DN23508_c1_g1
OG0000845	NA	NA	UP	NA	UP	NA	NA	DW	NA	6	1	2	2	3	OG0000845		TRINITY_DN18994_c5_g4	TRINITY_DN40193_c0_g1	TRINITY_DN22979_c2_g3	TRINITY_DN20068_c3_g2	TRINITY_DN12544_c4_g2	TRINITY_DN16430_c0_g3		TRINITY_DN38775_c0_g1
OG0000944	NA	NA	DW	NA	UP	NA	NA	NA	UP	6	1	2	2	3	OG0000944	TRINITY_DN25133_c2_g3	TRINITY_DN16589_c8_g2	TRINITY_DN35526_c0_g1	TRINITY_DN18752_c0_g1	TRINITY_DN23203_c5_g2	TRINITY_DN15880_c2_g1	TRINITY_DN8485_c0_g1	TRINITY_DN10368_c0_g1	TRINITY_DN17955_c0_g1
OG0000945	UP	NA	NA	NA	DW	NA	NA	DW	NA	6	2	1	2	3	OG0000945	TRINITY_DN25234_c1_g2	TRINITY_DN17519_c2_g1	TRINITY_DN42943_c4_g1	TRINITY_DN24097_c1_g1	TRINITY_DN24325_c6_g1	TRINITY_DN14218_c1_g2	TRINITY_DN19409_c0_g2		TRINITY_DN21284_c4_g1
OG0000958	NA	NA	DW	UP	UP	NA	NA	NA	NA	6	1	2	2	3	OG0000958	TRINITY_DN3043_c0_g2	TRINITY_DN28435_c0_g1	TRINITY_DN44603_c0_g1	TRINITY_DN23589_c1_g1	TRINITY_DN21443_c2_g1	TRINITY_DN15794_c1_g1	TRINITY_DN16585_c0_g1	TRINITY_DN1868_c1_g2	TRINITY_DN18835_c5_g2
OG0001077	NA	NA	DW	NA	UP	NA	NA	DW	NA	6	2	1	2	3	OG0001077		TRINITY_DN22815_c0_g1	TRINITY_DN43186_c0_g4	TRINITY_DN22732_c0_g1	TRINITY_DN8070_c0_g1	TRINITY_DN13495_c5_g2	TRINITY_DN34954_c0_g1	TRINITY_DN1015_c1_g2	TRINITY_DN14634_c0_g1
OG0001108	NA	NA	DW	UP	NA	NA	NA	UP	NA	6	1	2	2	3	OG0001108	TRINITY_DN5294_c0_g1	TRINITY_DN18953_c3_g1	TRINITY_DN44462_c0_g1	TRINITY_DN24437_c1_g1	TRINITY_DN4422_c0_g1	TRINITY_DN12800_c1_g2	TRINITY_DN39126_c0_g1	TRINITY_DN4520_c0_g1	TRINITY_DN18652_c6_g1
OG0001286	NA	NA	NA	UP	NA	NA	UP	NA	DW	6	1	2	2	3	OG0001286	TRINITY_DN487_c0_g2	TRINITY_DN18987_c4_g1	TRINITY_DN47450_c6_g1	TRINITY_DN22812_c7_g1	TRINITY_DN25182_c4_g1	TRINITY_DN15127_c6_g2	TRINITY_DN20750_c5_g2	TRINITY_DN430_c0_g2	TRINITY_DN23948_c9_g2
OG0001376	NA	DW	UP	NA	NA	NA	NA	NA	UP	6	1	2	2	3	OG0001376		TRINITY_DN14811_c0_g1	TRINITY_DN34499_c0_g1	TRINITY_DN18566_c0_g2	TRINITY_DN24620_c4_g2	TRINITY_DN13101_c2_g1	TRINITY_DN15577_c0_g1	TRINITY_DN20173_c0_g1	TRINITY_DN20775_c3_g1
OG0001417	NA	NA	UP	DW	NA	NA	NA	NA	UP	6	1	2	2	3	OG0001417	TRINITY_DN10389_c0_g2		TRINITY_DN41141_c0_g1	TRINITY_DN23678_c5_g1	TRINITY_DN28260_c0_g1	TRINITY_DN9284_c0_g2	TRINITY_DN21626_c0_g1	TRINITY_DN55644_c0_g1	TRINITY_DN23386_c4_g2
OG0001478	DW	NA	UP	DW	NA	NA	NA	NA	NA	6	2	1	2	3	OG0001478	TRINITY_DN135_c0_g5	TRINITY_DN19130_c2_g1	TRINITY_DN47768_c2_g1	TRINITY_DN24839_c2_g1	TRINITY_DN18932_c7_g2	TRINITY_DN12737_c1_g1	TRINITY_DN21031_c4_g1	TRINITY_DN1475_c0_g1	TRINITY_DN19799_c9_g2
OG0001514	NA	NA	UP	DW	NA	NA	NA	DW	NA	6	2	1	2	3	OG0001514	TRINITY_DN16896_c0_g2	TRINITY_DN14278_c0_g1	TRINITY_DN39595_c0_g2	TRINITY_DN5084_c0_g1	TRINITY_DN23610_c1_g1	TRINITY_DN18017_c2_g2	TRINITY_DN15170_c0_g1	TRINITY_DN707_c0_g1	TRINITY_DN18870_c8_g1
OG0001518	NA	NA	UP	NA	DW	NA	NA	UP	NA	6	1	2	2	3	OG0001518	TRINITY_DN17176_c1_g1	TRINITY_DN15639_c0_g2	TRINITY_DN37525_c0_g1	TRINITY_DN50026_c0_g1	TRINITY_DN21720_c8_g2	TRINITY_DN14104_c3_g3	TRINITY_DN20997_c2_g7	TRINITY_DN2096_c1_g5	TRINITY_DN22136_c8_g1
OG0001831	NA	NA	DW	UP	UP	NA	NA	NA	NA	6	1	2	2	3	OG0001831	TRINITY_DN8912_c0_g1	TRINITY_DN34373_c0_g1	TRINITY_DN49953_c0_g1	TRINITY_DN22105_c7_g2	TRINITY_DN19115_c7_g1	TRINITY_DN16287_c4_g2	TRINITY_DN16309_c0_g1	TRINITY_DN4173_c2_g4	TRINITY_DN21124_c0_g1
OG0001898	NA	NA	NA	UP	UP	NA	NA	DW	NA	6	1	2	2	3	OG0001898		TRINITY_DN9126_c0_g2	TRINITY_DN91979_c0_g1	TRINITY_DN15278_c0_g1	TRINITY_DN25380_c0_g4	TRINITY_DN2720_c0_g1	TRINITY_DN33053_c0_g1		TRINITY_DN49978_c0_g1
OG0002082	NA	DW	UP	NA	DW	NA	NA	NA	NA	6	2	1	2	3	OG0002082	TRINITY_DN1636_c0_g2	TRINITY_DN16987_c3_g4	TRINITY_DN42677_c4_g2	TRINITY_DN21976_c4_g1	TRINITY_DN22718_c4_g4	TRINITY_DN11695_c0_g1	TRINITY_DN15280_c0_g1	TRINITY_DN7408_c0_g1	TRINITY_DN19242_c0_g1
OG0002186	NA	NA	UP	DW	NA	NA	UP	NA	NA	6	1	2	2	3	OG0002186	TRINITY_DN22204_c0_g1	TRINITY_DN18726_c3_g1	TRINITY_DN47599_c5_g1	TRINITY_DN21734_c0_g2	TRINITY_DN20803_c0_g2	TRINITY_DN9107_c0_g1	TRINITY_DN15385_c0_g3	TRINITY_DN16414_c0_g2
OG0002257	NA	NA	UP	NA	NA	NA	NA	DW	DW	6	2	1	2	3	OG0002257	TRINITY_DN27141_c1_g1	TRINITY_DN19004_c8_g3	TRINITY_DN40668_c1_g1	TRINITY_DN23025_c6_g1	TRINITY_DN22578_c5_g2	TRINITY_DN18982_c7_g2	TRINITY_DN44565_c0_g1	TRINITY_DN892_c1_g1	TRINITY_DN21507_c4_g5
OG0002289	NA	DW	UP	NA	NA	NA	NA	UP	NA	6	1	2	2	3	OG0002289	TRINITY_DN2913_c0_g1	TRINITY_DN16119_c0_g2	TRINITY_DN42337_c4_g1	TRINITY_DN21926_c4_g1	TRINITY_DN23219_c3_g1	TRINITY_DN12239_c0_g1	TRINITY_DN960_c0_g1	TRINITY_DN533_c4_g2	TRINITY_DN19419_c2_g1
OG0002329	NA	DW	UP	NA	NA	NA	NA	NA	UP	6	1	2	2	3	OG0002329	TRINITY_DN3285_c0_g3	TRINITY_DN17701_c3_g1	TRINITY_DN40981_c1_g1	TRINITY_DN24861_c2_g1	TRINITY_DN12990_c0_g1	TRINITY_DN12918_c2_g1	TRINITY_DN16180_c0_g1	TRINITY_DN3149_c0_g2	TRINITY_DN61895_c0_g1
OG0002473	UP	NA	NA	NA	UP	NA	NA	NA	DW	6	1	2	2	3	OG0002473	TRINITY_DN5059_c0_g1	TRINITY_DN16190_c0_g1	TRINITY_DN47448_c0_g1	TRINITY_DN21840_c0_g1	TRINITY_DN21294_c0_g1	TRINITY_DN16240_c0_g2	TRINITY_DN16596_c0_g1	TRINITY_DN4388_c0_g1	TRINITY_DN20073_c0_g1
OG0002477	NA	NA	DW	NA	UP	NA	NA	NA	DW	6	2	1	2	3	OG0002477	TRINITY_DN5157_c1_g3	TRINITY_DN17445_c7_g1	TRINITY_DN47891_c0_g1	TRINITY_DN23567_c7_g1	TRINITY_DN23904_c4_g1	TRINITY_DN20909_c7_g1	TRINITY_DN20767_c8_g1	TRINITY_DN2651_c0_g2	TRINITY_DN22743_c10_g1
OG0002488	NA	NA	DW	NA	UP	NA	NA	DW	NA	6	2	1	2	3	OG0002488	TRINITY_DN52650_c0_g1	TRINITY_DN18733_c4_g1	TRINITY_DN11197_c0_g1	TRINITY_DN40621_c0_g1	TRINITY_DN22868_c3_g1	TRINITY_DN11262_c0_g1	TRINITY_DN39683_c0_g1		TRINITY_DN21726_c5_g2
OG0002536	NA	NA	UP	DW	NA	NA	NA	DW	NA	6	2	1	2	3	OG0002536	TRINITY_DN638_c2_g1	TRINITY_DN18323_c5_g1	TRINITY_DN40684_c0_g1	TRINITY_DN20704_c0_g1	TRINITY_DN24746_c6_g2	TRINITY_DN16379_c8_g1	TRINITY_DN20671_c3_g1		TRINITY_DN23311_c7_g1
OG0002866	NA	NA	UP	NA	DW	NA	NA	DW	NA	6	2	1	2	3	OG0002866	TRINITY_DN1097_c2_g5	TRINITY_DN16379_c7_g1	TRINITY_DN44288_c6_g1	TRINITY_DN23114_c8_g1	TRINITY_DN20230_c4_g1	TRINITY_DN16538_c5_g1	TRINITY_DN20132_c4_g2		TRINITY_DN22460_c8_g1
OG0002888	NA	NA	NA	NA	UP	NA	NA	DW	DW	6	2	1	2	3	OG0002888	TRINITY_DN11157_c0_g1	TRINITY_DN17587_c7_g1	TRINITY_DN48372_c3_g1	TRINITY_DN22253_c1_g5	TRINITY_DN22284_c5_g1	TRINITY_DN13535_c9_g2	TRINITY_DN16509_c0_g1	TRINITY_DN933_c3_g1	TRINITY_DN18665_c5_g1
OG0002942	NA	NA	UP	NA	NA	UP	NA	NA	DW	6	1	2	2	3	OG0002942	TRINITY_DN11690_c3_g1	TRINITY_DN17754_c3_g3	TRINITY_DN42907_c0_g1	TRINITY_DN21831_c3_g2	TRINITY_DN18512_c5_g2	TRINITY_DN15343_c3_g1	TRINITY_DN14342_c0_g2	TRINITY_DN7457_c0_g1	TRINITY_DN18864_c2_g1
OG0003131	NA	NA	DW	NA	UP	NA	NA	DW	NA	6	2	1	2	3	OG0003131	TRINITY_DN1377_c2_g1		TRINITY_DN63647_c0_g1	TRINITY_DN20065_c1_g1	TRINITY_DN21094_c7_g1	TRINITY_DN16207_c0_g2	TRINITY_DN17578_c7_g1		TRINITY_DN20567_c5_g1
OG0003317	NA	NA	UP	NA	DW	NA	NA	UP	NA	6	1	2	2	3	OG0003317	TRINITY_DN16009_c0_g1	TRINITY_DN15398_c0_g1	TRINITY_DN42800_c3_g1	TRINITY_DN20843_c0_g1	TRINITY_DN23503_c1_g3	TRINITY_DN11693_c0_g1	TRINITY_DN13540_c0_g1	TRINITY_DN5657_c0_g1	TRINITY_DN17683_c0_g1
OG0003420	NA	NA	UP	DW	NA	NA	NA	DW	NA	6	2	1	2	3	OG0003420	TRINITY_DN17561_c1_g1	TRINITY_DN16287_c11_g2	TRINITY_DN32740_c0_g1	TRINITY_DN20766_c0_g1	TRINITY_DN17038_c0_g2	TRINITY_DN16543_c2_g1	TRINITY_DN18450_c7_g3	TRINITY_DN33591_c0_g3	TRINITY_DN22149_c8_g1
OG0003444	NA	DW	UP	NA	DW	NA	NA	NA	NA	6	2	1	2	3	OG0003444	TRINITY_DN17756_c0_g1	TRINITY_DN16349_c7_g2	TRINITY_DN27511_c0_g1	TRINITY_DN24148_c8_g1	TRINITY_DN23806_c6_g3	TRINITY_DN17481_c3_g3	TRINITY_DN5586_c0_g1	TRINITY_DN325_c3_g2	TRINITY_DN18826_c4_g2
OG0003486	NA	NA	DW	NA	NA	NA	NA	UP	UP	6	1	2	2	3	OG0003486	TRINITY_DN18260_c8_g1	TRINITY_DN18134_c8_g5	TRINITY_DN80180_c0_g1	TRINITY_DN63207_c0_g1	TRINITY_DN5156_c0_g1	TRINITY_DN18357_c0_g1		TRINITY_DN29452_c1_g1	TRINITY_DN22095_c0_g1
OG0003566	NA	NA	DW	NA	UP	NA	NA	UP	NA	6	1	2	2	3	OG0003566	TRINITY_DN19555_c2_g2	TRINITY_DN18440_c2_g18	TRINITY_DN43892_c3_g1	TRINITY_DN22002_c14_g3	TRINITY_DN25096_c1_g1	TRINITY_DN12657_c0_g1	TRINITY_DN44559_c0_g1	TRINITY_DN3714_c1_g1	TRINITY_DN19978_c4_g3
OG0004134	NA	NA	DW	NA	NA	NA	NA	DW	UP	6	2	1	2	3	OG0004134	TRINITY_DN302_c0_g2	TRINITY_DN16855_c6_g2	TRINITY_DN85162_c0_g1	TRINITY_DN21068_c0_g1	TRINITY_DN21547_c2_g1	TRINITY_DN15891_c4_g1			TRINITY_DN21962_c0_g1
OG0004300	NA	DW	NA	NA	UP	NA	NA	UP	NA	6	1	2	2	3	OG0004300	TRINITY_DN3446_c5_g2	TRINITY_DN16798_c3_g1	TRINITY_DN41962_c4_g1	TRINITY_DN22536_c0_g1	TRINITY_DN38946_c0_g1	TRINITY_DN12687_c4_g1	TRINITY_DN3571_c0_g1	TRINITY_DN11349_c1_g1	TRINITY_DN5493_c0_g1
OG0004683	NA	NA	DW	NA	UP	NA	NA	DW	NA	6	2	1	2	3	OG0004683	TRINITY_DN455_c16_g2	TRINITY_DN18641_c2_g3	TRINITY_DN42493_c6_g2	TRINITY_DN21452_c0_g5	TRINITY_DN20659_c7_g9	TRINITY_DN17511_c4_g2	TRINITY_DN18546_c8_g2
OG0004766	NA	NA	DW	NA	NA	NA	NA	UP	UP	6	1	2	2	3	OG0004766	TRINITY_DN4786_c16_g1	TRINITY_DN17854_c7_g1	TRINITY_DN41168_c0_g1	TRINITY_DN21991_c5_g8	TRINITY_DN21396_c6_g1	TRINITY_DN18705_c4_g2	TRINITY_DN18294_c4_g1	TRINITY_DN2654_c0_g1	TRINITY_DN21057_c5_g1
OG0004884	DW	NA	UP	NA	NA	NA	NA	DW	NA	6	2	1	2	3	OG0004884	TRINITY_DN52551_c0_g1	TRINITY_DN14578_c0_g1	TRINITY_DN53876_c0_g1	TRINITY_DN17653_c0_g1	TRINITY_DN16607_c0_g1	TRINITY_DN19116_c4_g3	TRINITY_DN16787_c0_g1		TRINITY_DN18846_c2_g1
OG0005187	NA	NA	NA	NA	UP	UP	NA	DW	NA	6	1	2	2	3	OG0005187	TRINITY_DN683_c0_g1	TRINITY_DN15800_c0_g1	TRINITY_DN48421_c1_g1	TRINITY_DN20869_c0_g1	TRINITY_DN23019_c1_g1	TRINITY_DN16362_c4_g2	TRINITY_DN17131_c0_g1	TRINITY_DN1273_c0_g1	TRINITY_DN20909_c5_g3
OG0005409	NA	NA	DW	DW	UP	NA	NA	NA	NA	6	2	1	2	3	OG0005409	TRINITY_DN813_c0_g1	TRINITY_DN17605_c6_g1	TRINITY_DN44043_c5_g1	TRINITY_DN20728_c0_g3	TRINITY_DN21312_c3_g3	TRINITY_DN20466_c3_g1	TRINITY_DN17848_c2_g2	TRINITY_DN905_c1_g2	TRINITY_DN23112_c5_g1
OG0005662	NA	NA	DW	UP	NA	NA	NA	DW	NA	6	2	1	2	3	OG0005662		TRINITY_DN12351_c0_g1	TRINITY_DN62707_c0_g1	TRINITY_DN20922_c0_g3	TRINITY_DN13679_c1_g1	TRINITY_DN17657_c3_g2	TRINITY_DN24706_c0_g1		TRINITY_DN20957_c7_g2
OG0005698	NA	NA	DW	NA	UP	NA	NA	DW	NA	6	2	1	2	3	OG0005698		TRINITY_DN17265_c10_g1	TRINITY_DN45755_c0_g1	TRINITY_DN22678_c5_g2	TRINITY_DN19989_c2_g1	TRINITY_DN19127_c3_g2	TRINITY_DN20724_c4_g1	TRINITY_DN1798_c0_g2	TRINITY_DN22677_c7_g1
OG0005745	NA	NA	DW	UP	UP	NA	NA	NA	NA	6	1	2	2	3	OG0005745		TRINITY_DN2987_c0_g1	TRINITY_DN26619_c0_g1	TRINITY_DN11538_c0_g1	TRINITY_DN20530_c3_g1	TRINITY_DN13899_c3_g1	TRINITY_DN7288_c0_g1	TRINITY_DN17310_c0_g1	TRINITY_DN20467_c4_g1
OG0005921	NA	NA	UP	DW	NA	NA	NA	NA	DW	6	2	1	2	3	OG0005921	TRINITY_DN12596_c0_g1	TRINITY_DN1646_c0_g1	TRINITY_DN37048_c0_g1	TRINITY_DN20241_c0_g1	TRINITY_DN12809_c0_g2	TRINITY_DN9573_c0_g2		TRINITY_DN1231_c3_g1	TRINITY_DN23478_c9_g2
OG0005981	NA	NA	UP	DW	NA	NA	NA	UP	NA	6	1	2	2	3	OG0005981	TRINITY_DN13907_c0_g1	TRINITY_DN41445_c0_g1	TRINITY_DN91752_c0_g1	TRINITY_DN19301_c0_g1	TRINITY_DN47041_c0_g1	TRINITY_DN31648_c0_g1		TRINITY_DN24973_c1_g1
OG0006054	DW	NA	UP	UP	NA	NA	NA	NA	NA	6	1	2	2	3	OG0006054	TRINITY_DN1579_c0_g1	TRINITY_DN17145_c8_g3	TRINITY_DN41620_c0_g1	TRINITY_DN22397_c5_g1		TRINITY_DN16910_c4_g1	TRINITY_DN19239_c6_g1	TRINITY_DN916_c3_g2	TRINITY_DN22909_c4_g1
OG0006091	NA	NA	NA	NA	DW	NA	NA	DW	UP	6	2	1	2	3	OG0006091	TRINITY_DN16854_c0_g1	TRINITY_DN19273_c9_g6	TRINITY_DN44579_c6_g1	TRINITY_DN23555_c0_g2	TRINITY_DN21811_c3_g1	TRINITY_DN17985_c0_g1	TRINITY_DN21083_c4_g1		TRINITY_DN5597_c0_g1
OG0006290	NA	NA	UP	NA	NA	NA	NA	DW	DW	6	2	1	2	3	OG0006290	TRINITY_DN2351_c3_g1	TRINITY_DN19412_c5_g1	TRINITY_DN41393_c0_g2	TRINITY_DN22556_c3_g1	TRINITY_DN22124_c6_g2	TRINITY_DN15546_c6_g1	TRINITY_DN20510_c1_g4		TRINITY_DN23132_c4_g1
OG0006434	NA	NA	UP	NA	DW	NA	NA	DW	NA	6	2	1	2	3	OG0006434	TRINITY_DN30496_c0_g1	TRINITY_DN17494_c5_g1	TRINITY_DN44757_c3_g2	TRINITY_DN22162_c4_g8	TRINITY_DN22537_c4_g1	TRINITY_DN19728_c5_g6	TRINITY_DN19244_c2_g1
OG0006488	NA	NA	DW	UP	UP	NA	NA	NA	NA	6	1	2	2	3	OG0006488	TRINITY_DN32962_c1_g1	TRINITY_DN29883_c0_g1	TRINITY_DN52051_c0_g1	TRINITY_DN36287_c0_g1	TRINITY_DN17132_c0_g2	TRINITY_DN8292_c0_g1		TRINITY_DN3697_c0_g2	TRINITY_DN20119_c4_g5
OG0006626	NA	DW	UP	NA	NA	NA	NA	DW	NA	6	2	1	2	3	OG0006626	TRINITY_DN429_c13_g1	TRINITY_DN8431_c0_g2	TRINITY_DN45905_c5_g1	TRINITY_DN21632_c5_g2	TRINITY_DN20329_c6_g1	TRINITY_DN11933_c0_g1	TRINITY_DN5726_c0_g2		TRINITY_DN19700_c1_g3
OG0006682	DW	NA	DW	NA	UP	NA	NA	NA	NA	6	2	1	2	3	OG0006682	TRINITY_DN52445_c0_g1	TRINITY_DN24216_c0_g1	TRINITY_DN5556_c0_g1		TRINITY_DN18543_c3_g1		TRINITY_DN45973_c0_g1	TRINITY_DN64327_c1_g1	TRINITY_DN20223_c10_g1
OG0006729	NA	NA	UP	NA	DW	NA	NA	UP	NA	6	1	2	2	3	OG0006729	TRINITY_DN493_c2_g3	TRINITY_DN18898_c11_g9	TRINITY_DN46522_c9_g1		TRINITY_DN21431_c9_g1	TRINITY_DN18613_c7_g1	TRINITY_DN32767_c0_g1	TRINITY_DN9550_c0_g1	TRINITY_DN18772_c4_g1
OG0006768	DW	NA	NA	NA	UP	NA	NA	DW	NA	6	2	1	2	3	OG0006768	TRINITY_DN5307_c1_g1	TRINITY_DN18387_c0_g1	TRINITY_DN45042_c0_g1	TRINITY_DN22052_c5_g2	TRINITY_DN22038_c9_g3	TRINITY_DN16925_c6_g3			TRINITY_DN21548_c3_g1
OG0006807	NA	NA	UP	DW	NA	NA	NA	DW	NA	6	2	1	2	3	OG0006807	TRINITY_DN5598_c0_g2	TRINITY_DN18113_c7_g5	TRINITY_DN41849_c2_g1	TRINITY_DN21298_c5_g2	TRINITY_DN5315_c0_g1	TRINITY_DN20367_c6_g4			TRINITY_DN20436_c1_g1
OG0006999	UP	NA	UP	DW	NA	NA	NA	NA	NA	6	1	2	2	3	OG0006999	TRINITY_DN7808_c7_g1	TRINITY_DN29858_c0_g1	TRINITY_DN42105_c10_g4	TRINITY_DN19400_c0_g2		TRINITY_DN15377_c11_g1	TRINITY_DN41963_c0_g1	TRINITY_DN3101_c11_g1	TRINITY_DN20301_c4_g6
OG0007037	NA	NA	DW	NA	UP	NA	NA	DW	NA	6	2	1	2	3	OG0007037	TRINITY_DN8257_c0_g1	TRINITY_DN17240_c5_g1	TRINITY_DN44900_c2_g2	TRINITY_DN24623_c3_g1	TRINITY_DN23066_c3_g2	TRINITY_DN12432_c8_g3	TRINITY_DN19268_c4_g5		TRINITY_DN19729_c2_g1
OG0007136	NA	DW	UP	NA	UP	NA	NA	NA	NA	6	1	2	2	3	OG0007136	TRINITY_DN9748_c4_g1	TRINITY_DN33419_c0_g1	TRINITY_DN46360_c3_g1		TRINITY_DN22834_c7_g1	TRINITY_DN7920_c0_g1	TRINITY_DN18798_c3_g1	TRINITY_DN15000_c0_g1	TRINITY_DN19698_c5_g3
OG0007299	NA	NA	UP	NA	NA	NA	DW	DW	NA	6	2	1	2	3	OG0007299		TRINITY_DN19029_c9_g1	TRINITY_DN75258_c0_g1	TRINITY_DN2567_c0_g1	TRINITY_DN20264_c4_g1	TRINITY_DN19032_c5_g1	TRINITY_DN21252_c5_g1		TRINITY_DN18804_c5_g1
OG0007405	NA	NA	DW	UP	UP	NA	NA	NA	NA	6	1	2	2	3	OG0007405			TRINITY_DN52149_c0_g1	TRINITY_DN30429_c0_g1	TRINITY_DN22472_c6_g2	TRINITY_DN17002_c3_g3	TRINITY_DN6598_c0_g1	TRINITY_DN10870_c1_g1	TRINITY_DN18229_c4_g1
OG0007563	NA	NA	NA	UP	UP	NA	NA	DW	NA	6	1	2	2	3	OG0007563	TRINITY_DN15597_c0_g1	TRINITY_DN18651_c9_g1	TRINITY_DN40779_c1_g1	TRINITY_DN22101_c3_g1	TRINITY_DN24429_c4_g1		TRINITY_DN20817_c3_g1		TRINITY_DN23702_c6_g1
OG0007579	DW	NA	NA	UP	NA	NA	NA	DW	NA	6	2	1	2	3	OG0007579	TRINITY_DN16402_c3_g1	TRINITY_DN16461_c10_g8	TRINITY_DN15732_c0_g1	TRINITY_DN22062_c2_g4	TRINITY_DN45438_c0_g1	TRINITY_DN20570_c14_g1			TRINITY_DN21456_c3_g2
OG0007617	NA	NA	UP	DW	NA	NA	NA	UP	NA	6	1	2	2	3	OG0007617	TRINITY_DN1828_c1_g4	TRINITY_DN18448_c9_g6	TRINITY_DN40046_c0_g1	TRINITY_DN23140_c13_g1	TRINITY_DN20979_c4_g1		TRINITY_DN18723_c6_g2	TRINITY_DN1341_c4_g2
OG0007619	NA	NA	NA	DW	NA	UP	NA	NA	DW	6	2	1	2	3	OG0007619	TRINITY_DN183_c1_g1		TRINITY_DN48058_c3_g3	TRINITY_DN24317_c1_g1		TRINITY_DN20891_c1_g1	TRINITY_DN21131_c1_g3	TRINITY_DN539_c0_g1	TRINITY_DN21143_c1_g1
OG0007678	NA	NA	NA	UP	UP	NA	NA	DW	NA	6	1	2	2	3	OG0007678	TRINITY_DN21089_c1_g1		TRINITY_DN42544_c8_g1	TRINITY_DN23879_c4_g3	TRINITY_DN25343_c4_g1	TRINITY_DN11196_c0_g1	TRINITY_DN27877_c0_g1		TRINITY_DN20952_c2_g1
OG0007863	NA	NA	UP	DW	NA	NA	DW	NA	NA	6	2	1	2	3	OG0007863	TRINITY_DN36043_c1_g1	TRINITY_DN35989_c0_g1	TRINITY_DN22554_c0_g1	TRINITY_DN20741_c0_g1	TRINITY_DN28927_c0_g1		TRINITY_DN19493_c6_g7	TRINITY_DN92_c0_g4
OG0008114	NA	NA	UP	DW	NA	NA	NA	DW	NA	6	2	1	2	3	OG0008114	TRINITY_DN7098_c26_g1		TRINITY_DN41590_c13_g4	TRINITY_DN15266_c0_g1	TRINITY_DN33663_c0_g1	TRINITY_DN10792_c0_g1	TRINITY_DN9540_c0_g1		TRINITY_DN13566_c0_g1
OG0008139	NA	NA	UP	DW	NA	NA	NA	DW	NA	6	2	1	2	3	OG0008139	TRINITY_DN7759_c0_g1	TRINITY_DN14670_c0_g1	TRINITY_DN26699_c0_g1	TRINITY_DN23076_c9_g1	TRINITY_DN12250_c0_g1	TRINITY_DN10269_c0_g1	TRINITY_DN15121_c0_g1
OG0008172	NA	NA	UP	NA	DW	NA	NA	DW	NA	6	2	1	2	3	OG0008172	TRINITY_DN8766_c0_g1		TRINITY_DN47589_c3_g4		TRINITY_DN22443_c9_g2	TRINITY_DN12962_c4_g2	TRINITY_DN12610_c0_g1	TRINITY_DN2595_c0_g2	TRINITY_DN15057_c0_g1
OG0008217	NA	NA	NA	NA	NA	NA	DW	DW	UP	6	2	1	2	3	OG0008217		TRINITY_DN10367_c0_g1	TRINITY_DN96119_c0_g1	TRINITY_DN6901_c0_g1	TRINITY_DN15679_c0_g1	TRINITY_DN11585_c0_g1	TRINITY_DN3165_c0_g1		TRINITY_DN21846_c5_g3
OG0008351	NA	NA	UP	NA	UP	NA	NA	DW	NA	6	1	2	2	3	OG0008351		TRINITY_DN18441_c5_g3	TRINITY_DN46311_c7_g14	TRINITY_DN23800_c14_g1	TRINITY_DN21171_c1_g1	TRINITY_DN18030_c13_g1	TRINITY_DN20032_c4_g1		TRINITY_DN18414_c3_g1
OG0008425	NA	NA	UP	DW	NA	NA	NA	NA	UP	6	1	2	2	3	OG0008425		TRINITY_DN20106_c0_g1	TRINITY_DN37915_c0_g1	TRINITY_DN15424_c0_g2	TRINITY_DN17681_c0_g2		TRINITY_DN15260_c0_g2	TRINITY_DN1902_c0_g1	TRINITY_DN19359_c1_g2
OG0008431	NA	NA	DW	NA	UP	NA	NA	DW	NA	6	2	1	2	3	OG0008431		TRINITY_DN26599_c0_g1	TRINITY_DN46175_c0_g1	TRINITY_DN33938_c0_g1	TRINITY_DN8124_c0_g1	TRINITY_DN12531_c6_g1	TRINITY_DN6721_c0_g1		TRINITY_DN18752_c5_g1
OG0008441	NA	NA	UP	NA	NA	NA	NA	DW	DW	6	2	1	2	3	OG0008441		TRINITY_DN33631_c0_g1	TRINITY_DN9770_c0_g1	TRINITY_DN25941_c0_g1	TRINITY_DN19191_c2_g1	TRINITY_DN13413_c5_g1	TRINITY_DN19441_c7_g1		TRINITY_DN18188_c1_g1
OG0008470	NA	NA	UP	NA	NA	NA	UP	DW	NA	6	1	2	2	3	OG0008470		TRINITY_DN9234_c0_g1	TRINITY_DN62165_c0_g1	TRINITY_DN25745_c0_g1	TRINITY_DN3820_c0_g1	TRINITY_DN11845_c0_g1	TRINITY_DN3266_c0_g1		TRINITY_DN23727_c4_g1
OG0000349	NA	NA	DW	NA	NA	NA	NA	DW	NA	7	2	0	2	2	OG0000349	TRINITY_DN13396_c3_g1	TRINITY_DN18397_c2_g5	TRINITY_DN19714_c0_g1	TRINITY_DN21024_c0_g1	TRINITY_DN19835_c0_g1	TRINITY_DN19592_c14_g1	TRINITY_DN20584_c4_g3		TRINITY_DN19815_c7_g2
OG0000396	UP	NA	UP	NA	NA	NA	NA	NA	NA	7	0	2	2	2	OG0000396	TRINITY_DN968_c2_g2	TRINITY_DN16210_c0_g1	TRINITY_DN48608_c5_g1	TRINITY_DN21099_c0_g1	TRINITY_DN24024_c8_g1	TRINITY_DN20832_c2_g1	TRINITY_DN19061_c4_g3	TRINITY_DN9119_c0_g1	TRINITY_DN23516_c8_g1
OG0000423	NA	NA	NA	NA	NA	NA	NA	DW	DW	7	2	0	2	2	OG0000423	TRINITY_DN12886_c0_g1	TRINITY_DN19648_c7_g2	TRINITY_DN59215_c0_g1	TRINITY_DN24431_c7_g2	TRINITY_DN19971_c4_g1	TRINITY_DN19500_c0_g1	TRINITY_DN18080_c11_g3	TRINITY_DN13758_c0_g1	TRINITY_DN18982_c0_g2
OG0000562	NA	NA	NA	DW	NA	NA	NA	NA	DW	7	2	0	2	2	OG0000562	TRINITY_DN4870_c1_g2	TRINITY_DN16049_c0_g1	TRINITY_DN41308_c0_g1	TRINITY_DN21016_c0_g1	TRINITY_DN22381_c2_g4	TRINITY_DN19694_c3_g1	TRINITY_DN17120_c0_g2	TRINITY_DN1649_c0_g2	TRINITY_DN19621_c2_g1
OG0000594	NA	NA	DW	NA	NA	NA	NA	NA	DW	7	2	0	2	2	OG0000594	TRINITY_DN909_c1_g1	TRINITY_DN17495_c3_g1	TRINITY_DN46174_c1_g2	TRINITY_DN22343_c4_g1	TRINITY_DN24254_c4_g2	TRINITY_DN18651_c6_g1	TRINITY_DN21272_c3_g1	TRINITY_DN2468_c0_g1	TRINITY_DN19638_c4_g1
OG0000598	NA	NA	DW	NA	NA	NA	NA	DW	NA	7	2	0	2	2	OG0000598	TRINITY_DN14088_c0_g1	TRINITY_DN29622_c0_g1	TRINITY_DN14815_c0_g1	TRINITY_DN8017_c0_g1	TRINITY_DN20673_c0_g1	TRINITY_DN5221_c0_g1	TRINITY_DN47907_c0_g1		TRINITY_DN18562_c9_g1
OG0000639	DW	NA	NA	NA	DW	NA	NA	NA	NA	7	2	0	2	2	OG0000639	TRINITY_DN3339_c1_g1		TRINITY_DN78505_c0_g1	TRINITY_DN18677_c0_g2	TRINITY_DN23862_c5_g7	TRINITY_DN13815_c3_g1	TRINITY_DN19257_c5_g2	TRINITY_DN59593_c1_g1	TRINITY_DN20918_c1_g2
OG0000696	NA	NA	DW	NA	NA	NA	NA	DW	NA	7	2	0	2	2	OG0000696	TRINITY_DN100_c0_g4	TRINITY_DN19191_c2_g2	TRINITY_DN38779_c0_g1	TRINITY_DN22593_c4_g1	TRINITY_DN24790_c2_g1	TRINITY_DN21317_c0_g1	TRINITY_DN20726_c2_g1		TRINITY_DN23455_c7_g1
OG0000723	NA	NA	NA	NA	UP	NA	NA	NA	UP	7	0	2	2	2	OG0000723	TRINITY_DN14650_c0_g1	TRINITY_DN15433_c0_g1	TRINITY_DN29821_c0_g1	TRINITY_DN15989_c0_g1	TRINITY_DN22513_c0_g1	TRINITY_DN16125_c3_g1	TRINITY_DN17758_c8_g2	TRINITY_DN4152_c0_g1	TRINITY_DN18177_c13_g3
OG0000740	NA	NA	DW	NA	NA	NA	NA	NA	DW	7	2	0	2	2	OG0000740	TRINITY_DN18_c3_g2	TRINITY_DN18749_c2_g2	TRINITY_DN39135_c0_g1	TRINITY_DN24717_c1_g1	TRINITY_DN25036_c0_g1	TRINITY_DN19495_c2_g3	TRINITY_DN21290_c9_g1	TRINITY_DN2024_c0_g2	TRINITY_DN22683_c7_g2
OG0000755	NA	NA	DW	NA	NA	NA	NA	DW	NA	7	2	0	2	2	OG0000755	TRINITY_DN24991_c0_g1	TRINITY_DN17356_c6_g2	TRINITY_DN72375_c0_g1	TRINITY_DN37998_c0_g1	TRINITY_DN41796_c0_g1	TRINITY_DN8234_c0_g2	TRINITY_DN44217_c0_g1		TRINITY_DN17732_c0_g1
OG0000807	NA	NA	UP	NA	NA	NA	NA	NA	UP	7	0	2	2	2	OG0000807	TRINITY_DN6173_c1_g1	TRINITY_DN18963_c6_g2	TRINITY_DN48700_c5_g2	TRINITY_DN22148_c10_g2	TRINITY_DN19969_c4_g4	TRINITY_DN20344_c6_g2	TRINITY_DN18406_c7_g1	TRINITY_DN2470_c0_g1	TRINITY_DN21093_c3_g2
OG0000848	NA	NA	NA	NA	UP	NA	NA	UP	NA	7	0	2	2	2	OG0000848		TRINITY_DN19599_c1_g4	TRINITY_DN8759_c0_g2	TRINITY_DN54693_c0_g1	TRINITY_DN22800_c1_g1	TRINITY_DN13549_c5_g2	TRINITY_DN985_c0_g1	TRINITY_DN5675_c2_g2	TRINITY_DN21777_c1_g1
OG0000862	NA	NA	UP	NA	UP	NA	NA	NA	NA	7	0	2	2	2	OG0000862	TRINITY_DN10371_c3_g1	TRINITY_DN11413_c0_g2	TRINITY_DN43496_c5_g1	TRINITY_DN22491_c6_g1	TRINITY_DN23031_c3_g1	TRINITY_DN1980_c0_g1	TRINITY_DN45430_c0_g1	TRINITY_DN5282_c0_g1	TRINITY_DN51296_c0_g1
OG0000886	NA	NA	DW	NA	NA	NA	NA	DW	NA	7	2	0	2	2	OG0000886	TRINITY_DN133_c0_g2	TRINITY_DN19758_c3_g1	TRINITY_DN48772_c1_g1	TRINITY_DN24858_c10_g1	TRINITY_DN23026_c0_g1	TRINITY_DN19824_c1_g1	TRINITY_DN21319_c5_g1		TRINITY_DN20151_c3_g2
OG0000943	UP	NA	UP	NA	NA	NA	NA	NA	NA	7	0	2	2	2	OG0000943	TRINITY_DN25094_c1_g1	TRINITY_DN13560_c0_g1	TRINITY_DN46996_c8_g1	TRINITY_DN22821_c3_g1	TRINITY_DN19450_c0_g1	TRINITY_DN16462_c6_g1	TRINITY_DN18502_c2_g1	TRINITY_DN5311_c0_g2	TRINITY_DN22184_c5_g1
OG0000948	NA	NA	NA	NA	UP	NA	NA	UP	NA	7	0	2	2	2	OG0000948	TRINITY_DN26313_c2_g1	TRINITY_DN19791_c4_g2	TRINITY_DN43887_c4_g2	TRINITY_DN24585_c20_g1	TRINITY_DN22945_c5_g1	TRINITY_DN17991_c7_g2	TRINITY_DN13887_c0_g1	TRINITY_DN33677_c1_g1	TRINITY_DN23417_c2_g2
OG0000968	UP	NA	UP	NA	NA	NA	NA	NA	NA	7	0	2	2	2	OG0000968	TRINITY_DN33731_c2_g1	TRINITY_DN45146_c0_g1	TRINITY_DN89717_c0_g1	TRINITY_DN19835_c0_g1	TRINITY_DN41937_c0_g1	TRINITY_DN10907_c0_g2	TRINITY_DN45090_c0_g1	TRINITY_DN48208_c0_g1	TRINITY_DN22913_c8_g2
OG0000973	NA	NA	DW	NA	NA	NA	NA	DW	NA	7	2	0	2	2	OG0000973	TRINITY_DN35522_c0_g1	TRINITY_DN10614_c0_g1	TRINITY_DN39458_c0_g1	TRINITY_DN14459_c0_g1	TRINITY_DN21800_c0_g2	TRINITY_DN12132_c0_g1	TRINITY_DN45736_c0_g1	TRINITY_DN15103_c7_g1	TRINITY_DN19522_c7_g2
OG0001011	NA	NA	DW	NA	NA	NA	NA	NA	DW	7	2	0	2	2	OG0001011	TRINITY_DN5300_c0_g1	TRINITY_DN19730_c3_g1	TRINITY_DN31227_c0_g1	TRINITY_DN10384_c0_g2	TRINITY_DN2089_c0_g1	TRINITY_DN14266_c5_g2	TRINITY_DN15321_c0_g1	TRINITY_DN456_c3_g2	TRINITY_DN20882_c7_g2
OG0001012	NA	NA	DW	NA	NA	NA	NA	NA	DW	7	2	0	2	2	OG0001012	TRINITY_DN6830_c2_g1	TRINITY_DN17925_c5_g4	TRINITY_DN47944_c2_g5	TRINITY_DN22091_c3_g1	TRINITY_DN24182_c2_g1	TRINITY_DN14244_c4_g1	TRINITY_DN18438_c5_g1	TRINITY_DN5024_c0_g2	TRINITY_DN19011_c6_g5
OG0001051	NA	NA	DW	NA	NA	NA	NA	DW	NA	7	2	0	2	2	OG0001051	TRINITY_DN9063_c3_g1	TRINITY_DN19654_c9_g1	TRINITY_DN73868_c0_g1	TRINITY_DN22187_c2_g1	TRINITY_DN47722_c0_g1	TRINITY_DN14025_c7_g1	TRINITY_DN21154_c3_g1		TRINITY_DN19627_c3_g1
OG0001052	NA	NA	UP	NA	NA	NA	NA	NA	UP	7	0	2	2	2	OG0001052	TRINITY_DN9325_c0_g2	TRINITY_DN19269_c3_g2	TRINITY_DN41396_c0_g1	TRINITY_DN23069_c3_g5	TRINITY_DN19847_c5_g2	TRINITY_DN15928_c11_g1		TRINITY_DN2633_c0_g1	TRINITY_DN19611_c3_g1
OG0001074	NA	NA	DW	NA	NA	NA	NA	DW	NA	7	2	0	2	2	OG0001074		TRINITY_DN19666_c3_g1	TRINITY_DN43600_c3_g1	TRINITY_DN55153_c0_g1	TRINITY_DN29024_c0_g1	TRINITY_DN25115_c0_g1	TRINITY_DN28846_c0_g1		TRINITY_DN27048_c0_g1
OG0001156	NA	NA	UP	NA	UP	NA	NA	NA	NA	7	0	2	2	2	OG0001156	TRINITY_DN18866_c2_g1	TRINITY_DN22871_c0_g1	TRINITY_DN42161_c0_g2		TRINITY_DN23004_c6_g1	TRINITY_DN12664_c3_g1	TRINITY_DN26789_c0_g1	TRINITY_DN2612_c0_g1	TRINITY_DN22692_c10_g1
OG0001161	UP	NA	NA	NA	NA	NA	NA	UP	NA	7	0	2	2	2	OG0001161	TRINITY_DN19558_c0_g2	TRINITY_DN17825_c4_g6	TRINITY_DN48680_c0_g1	TRINITY_DN21570_c3_g6	TRINITY_DN19474_c7_g1	TRINITY_DN21189_c9_g2	TRINITY_DN17865_c2_g5	TRINITY_DN3287_c0_g2	TRINITY_DN22859_c2_g1
OG0001164	NA	NA	DW	NA	NA	NA	NA	DW	NA	7	2	0	2	2	OG0001164	TRINITY_DN515_c6_g2	TRINITY_DN18161_c1_g1	TRINITY_DN45852_c5_g1	TRINITY_DN23656_c4_g2	TRINITY_DN23831_c3_g2	TRINITY_DN16678_c3_g2			TRINITY_DN21699_c6_g1
OG0001187	NA	NA	UP	NA	NA	NA	NA	UP	NA	7	0	2	2	2	OG0001187	TRINITY_DN23361_c2_g1	TRINITY_DN18387_c2_g1	TRINITY_DN42145_c1_g1	TRINITY_DN23282_c4_g9	TRINITY_DN18276_c9_g1	TRINITY_DN19658_c4_g1	TRINITY_DN19483_c4_g2	TRINITY_DN10997_c0_g1	TRINITY_DN41819_c0_g1
OG0001194	DW	NA	NA	NA	NA	NA	NA	DW	NA	7	2	0	2	2	OG0001194	TRINITY_DN2478_c1_g1	TRINITY_DN5934_c0_g2	TRINITY_DN41012_c0_g1	TRINITY_DN24176_c11_g1	TRINITY_DN18260_c5_g1	TRINITY_DN20981_c1_g1	TRINITY_DN17979_c2_g2	TRINITY_DN674_c1_g1	TRINITY_DN18066_c0_g1
OG0001352	NA	NA	DW	NA	NA	NA	NA	DW	NA	7	2	0	2	2	OG0001352	TRINITY_DN846_c2_g1	TRINITY_DN28516_c0_g1	TRINITY_DN25798_c0_g1	TRINITY_DN1335_c0_g1	TRINITY_DN33305_c0_g1		TRINITY_DN30145_c0_g1		TRINITY_DN17586_c0_g1
OG0001360	NA	NA	UP	NA	NA	NA	NA	UP	NA	7	0	2	2	2	OG0001360	TRINITY_DN8910_c0_g2	TRINITY_DN17218_c4_g14	TRINITY_DN24465_c0_g1	TRINITY_DN20562_c0_g1	TRINITY_DN46378_c0_g1	TRINITY_DN14232_c6_g1	TRINITY_DN18452_c6_g1	TRINITY_DN1140_c4_g1	TRINITY_DN20262_c5_g1
OG0001368	NA	NA	DW	NA	NA	NA	NA	DW	NA	7	2	0	2	2	OG0001368	TRINITY_DN95_c3_g1	TRINITY_DN19554_c3_g1	TRINITY_DN37174_c0_g1	TRINITY_DN24689_c2_g1	TRINITY_DN25006_c1_g1	TRINITY_DN19991_c3_g2	TRINITY_DN20869_c9_g2		TRINITY_DN22681_c6_g1
OG0001369	NA	NA	DW	NA	NA	NA	NA	DW	NA	7	2	0	2	2	OG0001369	TRINITY_DN972_c15_g1	TRINITY_DN18124_c6_g1	TRINITY_DN45384_c10_g2	TRINITY_DN10594_c0_g1	TRINITY_DN16033_c0_g1	TRINITY_DN20868_c7_g1	TRINITY_DN17822_c7_g1		TRINITY_DN22665_c8_g1
OG0001390	NA	NA	DW	NA	NA	NA	NA	DW	NA	7	2	0	2	2	OG0001390		TRINITY_DN19028_c4_g4	TRINITY_DN42398_c5_g1	TRINITY_DN31615_c0_g1	TRINITY_DN19611_c7_g1	TRINITY_DN21247_c3_g2	TRINITY_DN11604_c0_g1		TRINITY_DN5436_c0_g2
OG0001412	NA	NA	NA	DW	NA	NA	NA	NA	DW	7	2	0	2	2	OG0001412	TRINITY_DN10008_c1_g1	TRINITY_DN18214_c1_g3	TRINITY_DN41859_c0_g1	TRINITY_DN24586_c6_g3	TRINITY_DN24051_c3_g1	TRINITY_DN15745_c1_g1	TRINITY_DN19682_c8_g4	TRINITY_DN6425_c0_g1	TRINITY_DN23387_c1_g1
OG0001440	NA	NA	NA	NA	NA	NA	NA	DW	DW	7	2	0	2	2	OG0001440	TRINITY_DN6171_c0_g1		TRINITY_DN47545_c5_g1	TRINITY_DN21925_c8_g1	TRINITY_DN21325_c3_g1	TRINITY_DN19446_c4_g1	TRINITY_DN19010_c4_g1	TRINITY_DN5460_c0_g2	TRINITY_DN20166_c2_g1
OG0001467	NA	NA	UP	NA	UP	NA	NA	NA	NA	7	0	2	2	2	OG0001467	TRINITY_DN1311_c1_g2	TRINITY_DN45752_c0_g1	TRINITY_DN44936_c2_g1	TRINITY_DN21802_c9_g1	TRINITY_DN21168_c5_g2	TRINITY_DN20062_c4_g1	TRINITY_DN18516_c2_g1	TRINITY_DN1080_c0_g1	TRINITY_DN22885_c5_g1
OG0001471	DW	NA	DW	NA	NA	NA	NA	NA	NA	7	2	0	2	2	OG0001471	TRINITY_DN13272_c4_g1		TRINITY_DN69175_c0_g1	TRINITY_DN24394_c8_g2	TRINITY_DN14505_c0_g2	TRINITY_DN12060_c0_g1	TRINITY_DN12560_c0_g2	TRINITY_DN11991_c1_g1	TRINITY_DN19723_c8_g1
OG0001540	NA	NA	NA	DW	NA	NA	DW	NA	NA	7	2	0	2	2	OG0001540	TRINITY_DN1936_c3_g1		TRINITY_DN35141_c0_g1	TRINITY_DN43026_c0_g1	TRINITY_DN15799_c0_g1	TRINITY_DN15400_c6_g2	TRINITY_DN4422_c0_g1	TRINITY_DN3622_c0_g2	TRINITY_DN18793_c2_g2
OG0001552	NA	NA	NA	NA	NA	NA	NA	DW	DW	7	2	0	2	2	OG0001552	TRINITY_DN20919_c1_g1	TRINITY_DN16551_c2_g1	TRINITY_DN43974_c6_g3	TRINITY_DN22172_c7_g1	TRINITY_DN17700_c0_g1	TRINITY_DN13171_c4_g1	TRINITY_DN19885_c9_g1	TRINITY_DN1471_c1_g1	TRINITY_DN19138_c1_g4
OG0001605	NA	NA	DW	DW	NA	NA	NA	NA	NA	7	2	0	2	2	OG0001605	TRINITY_DN2552_c1_g2	TRINITY_DN18471_c6_g1	TRINITY_DN44322_c2_g3	TRINITY_DN21891_c0_g1	TRINITY_DN21878_c5_g1	TRINITY_DN15482_c5_g1	TRINITY_DN15079_c0_g1	TRINITY_DN4812_c2_g1	TRINITY_DN21173_c3_g3
OG0001653	NA	NA	DW	NA	NA	NA	NA	DW	NA	7	2	0	2	2	OG0001653	TRINITY_DN3291_c0_g1	TRINITY_DN19547_c2_g1	TRINITY_DN49034_c8_g1	TRINITY_DN24449_c2_g1	TRINITY_DN23679_c3_g4	TRINITY_DN21278_c13_g1	TRINITY_DN21231_c4_g1		TRINITY_DN23736_c7_g1
OG0001660	DW	NA	NA	NA	NA	NA	NA	DW	NA	7	2	0	2	2	OG0001660	TRINITY_DN33925_c0_g3	TRINITY_DN17956_c2_g6	TRINITY_DN59711_c0_g1	TRINITY_DN19520_c0_g1	TRINITY_DN48371_c0_g1	TRINITY_DN13717_c7_g2	TRINITY_DN5253_c0_g2
OG0001699	NA	NA	DW	NA	NA	NA	DW	NA	NA	7	2	0	2	2	OG0001699	TRINITY_DN44610_c1_g1	TRINITY_DN15163_c0_g1	TRINITY_DN36943_c0_g1	TRINITY_DN785_c0_g1	TRINITY_DN18137_c0_g1	TRINITY_DN19131_c6_g1	TRINITY_DN17590_c0_g2	TRINITY_DN1186_c2_g2	TRINITY_DN22393_c4_g1
OG0001748	NA	NA	DW	NA	NA	NA	NA	DW	NA	7	2	0	2	2	OG0001748	TRINITY_DN5690_c0_g1	TRINITY_DN19270_c2_g3	TRINITY_DN41438_c1_g1	TRINITY_DN22915_c10_g1	TRINITY_DN22700_c4_g4	TRINITY_DN13590_c3_g1	TRINITY_DN19662_c7_g2		TRINITY_DN22986_c1_g7
OG0001782	NA	NA	DW	NA	NA	NA	NA	DW	NA	7	2	0	2	2	OG0001782	TRINITY_DN7108_c0_g1	TRINITY_DN18245_c5_g5	TRINITY_DN44412_c1_g4	TRINITY_DN24123_c6_g4	TRINITY_DN21224_c14_g1	TRINITY_DN18740_c8_g1	TRINITY_DN21060_c0_g3		TRINITY_DN23416_c8_g1
OG0001874	NA	NA	NA	NA	NA	NA	NA	DW	DW	7	2	0	2	2	OG0001874		TRINITY_DN17227_c2_g1	TRINITY_DN36196_c0_g1	TRINITY_DN23738_c8_g2	TRINITY_DN20163_c7_g1	TRINITY_DN19415_c4_g6	TRINITY_DN21002_c5_g3		TRINITY_DN23251_c6_g2
OG0001883	NA	NA	DW	NA	NA	NA	NA	NA	DW	7	2	0	2	2	OG0001883		TRINITY_DN18482_c3_g1	TRINITY_DN42846_c4_g1	TRINITY_DN46709_c0_g1	TRINITY_DN18905_c1_g2	TRINITY_DN25649_c0_g1	TRINITY_DN19747_c2_g18	TRINITY_DN1655_c4_g3	TRINITY_DN18494_c3_g2
OG0001914	NA	NA	NA	NA	NA	NA	NA	DW	DW	7	2	0	2	2	OG0001914	TRINITY_DN10009_c1_g1	TRINITY_DN14789_c0_g1	TRINITY_DN42314_c0_g1	TRINITY_DN21961_c6_g1	TRINITY_DN21155_c7_g1	TRINITY_DN21415_c7_g1	TRINITY_DN18612_c0_g2	TRINITY_DN31051_c0_g3	TRINITY_DN23544_c5_g1
OG0001964	UP	NA	UP	NA	NA	NA	NA	NA	NA	7	0	2	2	2	OG0001964	TRINITY_DN11796_c0_g2	TRINITY_DN18454_c9_g1	TRINITY_DN41967_c2_g2	TRINITY_DN22573_c7_g2	TRINITY_DN19909_c6_g1	TRINITY_DN12614_c4_g2	TRINITY_DN16244_c0_g1	TRINITY_DN3645_c0_g1	TRINITY_DN21255_c6_g1
OG0002039	NA	NA	DW	NA	NA	NA	NA	NA	DW	7	2	0	2	2	OG0002039	TRINITY_DN14293_c12_g1	TRINITY_DN46184_c0_g1	TRINITY_DN43312_c0_g2	TRINITY_DN38380_c0_g1		TRINITY_DN8187_c0_g1	TRINITY_DN33154_c0_g1	TRINITY_DN50114_c5_g1	TRINITY_DN21767_c1_g1
OG0002066	NA	NA	UP	NA	UP	NA	NA	NA	NA	7	0	2	2	2	OG0002066	TRINITY_DN15519_c2_g1		TRINITY_DN39649_c0_g1	TRINITY_DN24758_c2_g2	TRINITY_DN19058_c0_g2	TRINITY_DN16023_c1_g1	TRINITY_DN18687_c4_g1	TRINITY_DN16158_c0_g1	TRINITY_DN13881_c0_g1
OG0002095	NA	NA	DW	NA	NA	NA	NA	DW	NA	7	2	0	2	2	OG0002095	TRINITY_DN16929_c2_g1	TRINITY_DN18373_c7_g5	TRINITY_DN37536_c0_g1	TRINITY_DN10380_c0_g1	TRINITY_DN24173_c8_g1	TRINITY_DN13379_c9_g1	TRINITY_DN12588_c0_g1		TRINITY_DN20801_c4_g8
OG0002100	NA	NA	DW	NA	NA	NA	NA	DW	NA	7	2	0	2	2	OG0002100	TRINITY_DN17319_c2_g1	TRINITY_DN17309_c6_g1	TRINITY_DN45583_c0_g1	TRINITY_DN21756_c11_g1	TRINITY_DN23991_c3_g1	TRINITY_DN15858_c7_g1	TRINITY_DN18800_c5_g1	TRINITY_DN45_c1_g2	TRINITY_DN22108_c3_g1
OG0002114	NA	NA	NA	UP	UP	NA	NA	NA	NA	7	0	2	2	2	OG0002114	TRINITY_DN18133_c4_g1	TRINITY_DN19276_c6_g3	TRINITY_DN35501_c0_g1	TRINITY_DN50845_c0_g1	TRINITY_DN20218_c9_g1	TRINITY_DN14129_c7_g3		TRINITY_DN8795_c0_g1	TRINITY_DN22329_c5_g1
OG0002179	NA	NA	UP	NA	NA	NA	UP	NA	NA	7	0	2	2	2	OG0002179	TRINITY_DN2197_c0_g1	TRINITY_DN16901_c0_g4	TRINITY_DN38227_c0_g2	TRINITY_DN15164_c0_g1	TRINITY_DN22447_c4_g1		TRINITY_DN18027_c7_g4	TRINITY_DN71_c0_g3	TRINITY_DN22901_c2_g1
OG0002207	NA	NA	DW	NA	NA	NA	NA	DW	NA	7	2	0	2	2	OG0002207	TRINITY_DN23230_c4_g1	TRINITY_DN16457_c7_g8	TRINITY_DN86801_c0_g1	TRINITY_DN24411_c6_g1		TRINITY_DN19703_c6_g3	TRINITY_DN19454_c0_g2		TRINITY_DN42965_c0_g1
OG0002282	NA	NA	NA	NA	UP	NA	NA	UP	NA	7	0	2	2	2	OG0002282	TRINITY_DN28594_c0_g1	TRINITY_DN18690_c4_g1	TRINITY_DN62293_c0_g1	TRINITY_DN8883_c0_g1	TRINITY_DN18984_c0_g2	TRINITY_DN16476_c2_g1	TRINITY_DN20756_c9_g2	TRINITY_DN3665_c1_g2	TRINITY_DN20452_c6_g1
OG0002316	NA	NA	NA	NA	DW	NA	NA	NA	DW	7	2	0	2	2	OG0002316	TRINITY_DN312_c0_g2	TRINITY_DN18927_c7_g2	TRINITY_DN43835_c1_g1		TRINITY_DN21438_c6_g1	TRINITY_DN13226_c7_g3	TRINITY_DN16828_c0_g1	TRINITY_DN29858_c0_g1	TRINITY_DN18342_c13_g1
OG0002361	NA	NA	UP	NA	NA	NA	NA	UP	NA	7	0	2	2	2	OG0002361	TRINITY_DN36013_c2_g1	TRINITY_DN17028_c2_g3	TRINITY_DN31823_c0_g1	TRINITY_DN24305_c8_g3	TRINITY_DN36939_c0_g1	TRINITY_DN19195_c4_g2	TRINITY_DN14664_c0_g1	TRINITY_DN22686_c1_g1	TRINITY_DN18971_c9_g1
OG0002391	NA	NA	DW	NA	NA	NA	NA	DW	NA	7	2	0	2	2	OG0002391	TRINITY_DN38948_c2_g1	TRINITY_DN11310_c0_g3	TRINITY_DN25891_c0_g2	TRINITY_DN23871_c2_g6	TRINITY_DN25764_c0_g1		TRINITY_DN8790_c0_g1		TRINITY_DN18787_c6_g10
OG0002455	NA	NA	DW	NA	NA	NA	NA	DW	NA	7	2	0	2	2	OG0002455	TRINITY_DN48908_c2_g1	TRINITY_DN12_c0_g2	TRINITY_DN42137_c11_g1	TRINITY_DN16283_c0_g1	TRINITY_DN12258_c0_g1	TRINITY_DN12603_c1_g1	TRINITY_DN20157_c7_g11		TRINITY_DN18489_c5_g1
OG0002480	NA	NA	NA	DW	NA	NA	NA	DW	NA	7	2	0	2	2	OG0002480	TRINITY_DN516_c0_g1	TRINITY_DN18202_c1_g1	TRINITY_DN44516_c0_g1	TRINITY_DN50071_c0_g1	TRINITY_DN18692_c1_g3	TRINITY_DN21062_c2_g1	TRINITY_DN18794_c5_g1		TRINITY_DN28229_c0_g1
OG0002490	NA	NA	NA	NA	UP	NA	NA	NA	UP	7	0	2	2	2	OG0002490	TRINITY_DN528_c1_g1	TRINITY_DN19543_c4_g1	TRINITY_DN47185_c0_g1		TRINITY_DN23164_c3_g1	TRINITY_DN19674_c2_g1	TRINITY_DN21134_c2_g2	TRINITY_DN2915_c0_g2	TRINITY_DN21384_c6_g1
OG0002630	NA	NA	DW	NA	NA	NA	DW	NA	NA	7	2	0	2	2	OG0002630	TRINITY_DN8775_c0_g3	TRINITY_DN18942_c3_g8	TRINITY_DN44027_c5_g3	TRINITY_DN22189_c9_g3	TRINITY_DN23080_c10_g1	TRINITY_DN14160_c5_g4	TRINITY_DN20261_c0_g2	TRINITY_DN5449_c1_g2	TRINITY_DN22456_c3_g5
OG0002723	NA	NA	DW	NA	NA	NA	NA	DW	NA	7	2	0	2	2	OG0002723		TRINITY_DN19339_c9_g1	TRINITY_DN46048_c9_g1	TRINITY_DN24431_c4_g1	TRINITY_DN19471_c7_g1	TRINITY_DN19256_c1_g1	TRINITY_DN20941_c5_g2		TRINITY_DN19897_c4_g1
OG0002732	NA	NA	NA	NA	UP	UP	NA	NA	NA	7	0	2	2	2	OG0002732		TRINITY_DN39369_c0_g1	TRINITY_DN36595_c0_g1	TRINITY_DN9981_c0_g1	TRINITY_DN19550_c6_g1	TRINITY_DN12889_c1_g1	TRINITY_DN40673_c0_g1	TRINITY_DN27935_c0_g2	TRINITY_DN23673_c6_g1
OG0002767	NA	NA	UP	NA	UP	NA	NA	NA	NA	7	0	2	2	2	OG0002767	TRINITY_DN1006_c4_g2	TRINITY_DN16840_c0_g2	TRINITY_DN44006_c4_g1	TRINITY_DN24784_c6_g1	TRINITY_DN19802_c8_g1	TRINITY_DN15052_c3_g4	TRINITY_DN17661_c3_g11	TRINITY_DN7927_c0_g1	TRINITY_DN19587_c4_g2
OG0003041	NA	NA	NA	NA	UP	NA	NA	NA	UP	7	0	2	2	2	OG0003041	TRINITY_DN12761_c2_g1	TRINITY_DN18148_c7_g20	TRINITY_DN34372_c0_g1	TRINITY_DN5649_c0_g2	TRINITY_DN24672_c2_g1	TRINITY_DN14275_c9_g3	TRINITY_DN20903_c6_g7	TRINITY_DN6997_c0_g2	TRINITY_DN23421_c12_g3
OG0003090	NA	DW	NA	NA	DW	NA	NA	NA	NA	7	2	0	2	2	OG0003090	TRINITY_DN13259_c1_g1	TRINITY_DN34361_c0_g1	TRINITY_DN45631_c10_g2	TRINITY_DN59346_c0_g1	TRINITY_DN18626_c7_g3	TRINITY_DN12928_c10_g1	TRINITY_DN18851_c8_g5	TRINITY_DN34195_c0_g3	TRINITY_DN23000_c3_g3
OG0003120	DW	NA	NA	NA	NA	NA	NA	DW	NA	7	2	0	2	2	OG0003120	TRINITY_DN135_c1_g4	TRINITY_DN19368_c3_g14	TRINITY_DN48528_c9_g2	TRINITY_DN23659_c2_g2	TRINITY_DN23066_c6_g2	TRINITY_DN13712_c5_g3	TRINITY_DN21077_c7_g1		TRINITY_DN18634_c14_g1
OG0003141	NA	NA	NA	DW	NA	NA	NA	DW	NA	7	2	0	2	2	OG0003141	TRINITY_DN13888_c0_g1	TRINITY_DN18052_c7_g1	TRINITY_DN43825_c0_g1	TRINITY_DN22026_c6_g1	TRINITY_DN18864_c2_g1	TRINITY_DN20427_c6_g1	TRINITY_DN16166_c0_g1	TRINITY_DN13213_c0_g1	TRINITY_DN22830_c5_g1
OG0003292	NA	NA	DW	NA	NA	NA	NA	DW	NA	7	2	0	2	2	OG0003292	TRINITY_DN15663_c0_g1	TRINITY_DN16454_c2_g2	TRINITY_DN48423_c6_g2	TRINITY_DN20347_c0_g1	TRINITY_DN18574_c9_g2	TRINITY_DN20343_c8_g1	TRINITY_DN6753_c0_g1		TRINITY_DN21895_c2_g6
OG0003300	NA	DW	NA	NA	NA	NA	NA	DW	NA	7	2	0	2	2	OG0003300	TRINITY_DN1582_c1_g2	TRINITY_DN7104_c0_g1	TRINITY_DN46399_c6_g2	TRINITY_DN23130_c3_g1	TRINITY_DN18886_c2_g2	TRINITY_DN14343_c4_g3	TRINITY_DN17101_c0_g1		TRINITY_DN19628_c3_g3
OG0003398	NA	NA	NA	NA	NA	NA	NA	UP	UP	7	0	2	2	2	OG0003398	TRINITY_DN1703_c4_g2	TRINITY_DN17332_c9_g3	TRINITY_DN43843_c7_g2	TRINITY_DN24242_c3_g3		TRINITY_DN14366_c2_g1	TRINITY_DN19359_c8_g9	TRINITY_DN1483_c1_g2	TRINITY_DN18133_c4_g21
OG0003418	NA	NA	NA	DW	NA	NA	NA	DW	NA	7	2	0	2	2	OG0003418	TRINITY_DN1754_c1_g1	TRINITY_DN4593_c0_g1	TRINITY_DN39960_c0_g1	TRINITY_DN28574_c0_g1	TRINITY_DN20122_c4_g1		TRINITY_DN7585_c0_g1		TRINITY_DN16944_c0_g1
OG0003457	NA	NA	NA	UP	UP	NA	NA	NA	NA	7	0	2	2	2	OG0003457	TRINITY_DN1795_c0_g1	TRINITY_DN19555_c14_g1	TRINITY_DN44051_c0_g1	TRINITY_DN22954_c9_g2	TRINITY_DN23844_c8_g1	TRINITY_DN15048_c4_g1	TRINITY_DN18482_c6_g1	TRINITY_DN5202_c0_g1	TRINITY_DN46733_c0_g1
OG0003504	NA	NA	DW	DW	NA	NA	NA	NA	NA	7	2	0	2	2	OG0003504	TRINITY_DN18534_c0_g1	TRINITY_DN2220_c0_g1	TRINITY_DN40126_c1_g2	TRINITY_DN20458_c0_g1	TRINITY_DN24423_c0_g1		TRINITY_DN19050_c4_g1	TRINITY_DN3990_c2_g1
OG0003541	NA	NA	UP	NA	NA	NA	NA	UP	NA	7	0	2	2	2	OG0003541	TRINITY_DN1915_c0_g1	TRINITY_DN16801_c7_g2	TRINITY_DN42074_c1_g2	TRINITY_DN22456_c5_g2	TRINITY_DN21884_c9_g1	TRINITY_DN16290_c5_g1	TRINITY_DN18358_c0_g1	TRINITY_DN3777_c0_g1	TRINITY_DN18644_c0_g1
OG0003562	DW	NA	NA	NA	NA	NA	NA	DW	NA	7	2	0	2	2	OG0003562	TRINITY_DN1951_c11_g1	TRINITY_DN9168_c0_g1	TRINITY_DN44512_c6_g7	TRINITY_DN24318_c13_g3	TRINITY_DN17330_c0_g1	TRINITY_DN20093_c1_g1	TRINITY_DN5201_c0_g1	TRINITY_DN7268_c0_g1	TRINITY_DN18651_c7_g3
OG0003568	NA	NA	NA	DW	NA	NA	NA	NA	DW	7	2	0	2	2	OG0003568	TRINITY_DN1957_c0_g2	TRINITY_DN18611_c4_g1	TRINITY_DN45121_c3_g1	TRINITY_DN22554_c6_g1	TRINITY_DN20036_c1_g4	TRINITY_DN15799_c7_g1	TRINITY_DN19362_c8_g2	TRINITY_DN2032_c1_g4	TRINITY_DN22526_c5_g1
OG0003634	NA	NA	NA	NA	NA	NA	NA	DW	DW	7	2	0	2	2	OG0003634	TRINITY_DN20552_c3_g1	TRINITY_DN18151_c1_g1	TRINITY_DN42055_c9_g1	TRINITY_DN22554_c1_g1	TRINITY_DN20185_c9_g3	TRINITY_DN17660_c5_g1	TRINITY_DN19864_c3_g2	TRINITY_DN25723_c0_g2	TRINITY_DN23520_c7_g3
OG0003716	UP	NA	NA	NA	UP	NA	NA	NA	NA	7	0	2	2	2	OG0003716	TRINITY_DN21_c10_g1	TRINITY_DN18411_c4_g2	TRINITY_DN43536_c0_g2	TRINITY_DN23986_c4_g3	TRINITY_DN21608_c1_g2	TRINITY_DN20295_c1_g1	TRINITY_DN16075_c0_g1	TRINITY_DN7248_c0_g1	TRINITY_DN18079_c0_g1
OG0003836	NA	NA	UP	NA	UP	NA	NA	NA	NA	7	0	2	2	2	OG0003836	TRINITY_DN23912_c0_g1		TRINITY_DN40261_c0_g1	TRINITY_DN19996_c0_g1	TRINITY_DN19076_c9_g3	TRINITY_DN19858_c8_g1	TRINITY_DN20742_c8_g9	TRINITY_DN43631_c1_g1	TRINITY_DN18803_c5_g4
OG0003896	NA	DW	NA	NA	DW	NA	NA	NA	NA	7	2	0	2	2	OG0003896	TRINITY_DN25163_c8_g1	TRINITY_DN17567_c6_g5	TRINITY_DN32426_c0_g1	TRINITY_DN11500_c0_g1	TRINITY_DN24146_c8_g5	TRINITY_DN13496_c11_g1	TRINITY_DN9144_c0_g1	TRINITY_DN2749_c0_g2	TRINITY_DN17911_c0_g1
OG0003923	NA	NA	NA	NA	NA	DW	NA	NA	DW	7	2	0	2	2	OG0003923	TRINITY_DN2577_c2_g1	TRINITY_DN16088_c0_g1	TRINITY_DN44119_c0_g1	TRINITY_DN24726_c3_g1	TRINITY_DN18488_c9_g1	TRINITY_DN12886_c10_g2	TRINITY_DN19807_c4_g2	TRINITY_DN3135_c1_g1	TRINITY_DN21722_c4_g2
OG0003950	NA	NA	DW	NA	NA	NA	NA	DW	NA	7	2	0	2	2	OG0003950	TRINITY_DN2631_c17_g1	TRINITY_DN17182_c1_g3	TRINITY_DN48321_c0_g3	TRINITY_DN22680_c8_g1	TRINITY_DN18526_c7_g1	TRINITY_DN17720_c4_g2	TRINITY_DN19422_c5_g2
OG0004015	UP	NA	NA	NA	NA	NA	NA	UP	NA	7	0	2	2	2	OG0004015	TRINITY_DN27730_c1_g1	TRINITY_DN14745_c0_g1	TRINITY_DN39660_c0_g1	TRINITY_DN21359_c0_g1	TRINITY_DN17838_c0_g1	TRINITY_DN19426_c4_g1	TRINITY_DN16957_c0_g1	TRINITY_DN18484_c0_g2	TRINITY_DN21063_c11_g1
OG0004084	NA	NA	NA	NA	UP	NA	NA	NA	UP	7	0	2	2	2	OG0004084	TRINITY_DN2922_c0_g4	TRINITY_DN15361_c0_g1	TRINITY_DN44609_c11_g3	TRINITY_DN24442_c2_g2	TRINITY_DN23051_c2_g4	TRINITY_DN12399_c4_g1	TRINITY_DN20228_c7_g2	TRINITY_DN3098_c0_g2	TRINITY_DN22729_c11_g3
OG0004097	NA	NA	UP	NA	NA	NA	NA	UP	NA	7	0	2	2	2	OG0004097	TRINITY_DN293_c3_g1	TRINITY_DN17157_c3_g1	TRINITY_DN44782_c3_g1	TRINITY_DN24122_c9_g1	TRINITY_DN21784_c4_g5	TRINITY_DN18971_c5_g4	TRINITY_DN18691_c15_g1	TRINITY_DN2200_c0_g1	TRINITY_DN21834_c27_g2
OG0004156	NA	NA	UP	NA	NA	NA	NA	UP	NA	7	0	2	2	2	OG0004156	TRINITY_DN3081_c0_g2	TRINITY_DN18089_c7_g1	TRINITY_DN44375_c1_g2	TRINITY_DN23754_c5_g3	TRINITY_DN24677_c3_g3	TRINITY_DN19068_c3_g1	TRINITY_DN19822_c3_g2	TRINITY_DN56_c2_g1	TRINITY_DN20770_c1_g1
OG0004166	NA	NA	UP	NA	UP	NA	NA	NA	NA	7	0	2	2	2	OG0004166	TRINITY_DN3116_c1_g3	TRINITY_DN2786_c0_g1	TRINITY_DN40247_c0_g1	TRINITY_DN23887_c8_g2	TRINITY_DN20801_c4_g1	TRINITY_DN13729_c2_g1	TRINITY_DN5921_c0_g2	TRINITY_DN5889_c0_g2	TRINITY_DN21038_c6_g1
OG0004259	NA	NA	NA	NA	NA	DW	NA	DW	NA	7	2	0	2	2	OG0004259	TRINITY_DN33332_c2_g1	TRINITY_DN8517_c0_g1	TRINITY_DN66873_c0_g1	TRINITY_DN2312_c0_g1	TRINITY_DN49659_c0_g1	TRINITY_DN9415_c0_g1			TRINITY_DN21212_c9_g1
OG0004403	UP	NA	NA	NA	UP	NA	NA	NA	NA	7	0	2	2	2	OG0004403	TRINITY_DN37351_c0_g1	TRINITY_DN19358_c4_g1	TRINITY_DN46727_c0_g1	TRINITY_DN22380_c8_g2	TRINITY_DN23744_c1_g1	TRINITY_DN17150_c1_g1	TRINITY_DN20176_c5_g1	TRINITY_DN961_c1_g2	TRINITY_DN22340_c2_g1
OG0004417	NA	NA	NA	UP	UP	NA	NA	NA	NA	7	0	2	2	2	OG0004417	TRINITY_DN3767_c2_g4	TRINITY_DN17756_c4_g2	TRINITY_DN44754_c1_g3	TRINITY_DN22378_c2_g1	TRINITY_DN22721_c0_g1	TRINITY_DN18727_c8_g1	TRINITY_DN18978_c4_g1	TRINITY_DN3455_c0_g3	TRINITY_DN20954_c4_g1
OG0004543	NA	NA	DW	NA	NA	NA	NA	DW	NA	7	2	0	2	2	OG0004543	TRINITY_DN41130_c1_g1	TRINITY_DN12063_c0_g2	TRINITY_DN5115_c0_g2	TRINITY_DN14584_c0_g1	TRINITY_DN23241_c5_g1	TRINITY_DN4666_c0_g1	TRINITY_DN30584_c0_g1	TRINITY_DN51990_c0_g1	TRINITY_DN17092_c0_g1
OG0004569	NA	NA	DW	NA	NA	NA	NA	DW	NA	7	2	0	2	2	OG0004569	TRINITY_DN42254_c1_g1	TRINITY_DN14473_c0_g1	TRINITY_DN5508_c0_g2	TRINITY_DN60945_c0_g1	TRINITY_DN46747_c0_g1	TRINITY_DN20027_c7_g1	TRINITY_DN5464_c0_g1
OG0004635	NA	NA	DW	NA	NA	NA	NA	DW	NA	7	2	0	2	2	OG0004635	TRINITY_DN4426_c0_g1	TRINITY_DN16059_c0_g1	TRINITY_DN43137_c0_g1	TRINITY_DN20430_c0_g1	TRINITY_DN20688_c2_g1	TRINITY_DN15167_c9_g1	TRINITY_DN16772_c0_g1		TRINITY_DN44871_c0_g1
OG0004640	NA	NA	DW	NA	NA	NA	NA	NA	DW	7	2	0	2	2	OG0004640	TRINITY_DN443_c0_g1	TRINITY_DN19739_c6_g2	TRINITY_DN47263_c6_g1	TRINITY_DN24735_c6_g1	TRINITY_DN24267_c3_g1	TRINITY_DN19943_c7_g1		TRINITY_DN1359_c1_g1	TRINITY_DN22552_c3_g2
OG0004668	NA	NA	UP	NA	NA	NA	UP	NA	NA	7	0	2	2	2	OG0004668	TRINITY_DN4500_c0_g2	TRINITY_DN19305_c4_g1	TRINITY_DN40521_c0_g1	TRINITY_DN24507_c6_g1	TRINITY_DN23054_c3_g1		TRINITY_DN20422_c6_g5	TRINITY_DN4982_c0_g1	TRINITY_DN21609_c4_g2
OG0004742	NA	NA	NA	DW	NA	NA	NA	DW	NA	7	2	0	2	2	OG0004742	TRINITY_DN4720_c0_g2	TRINITY_DN17487_c2_g2	TRINITY_DN43020_c0_g1	TRINITY_DN19081_c0_g1	TRINITY_DN19692_c8_g1	TRINITY_DN17907_c2_g1	TRINITY_DN16979_c0_g1		TRINITY_DN37773_c0_g1
OG0004748	NA	DW	NA	NA	DW	NA	NA	NA	NA	7	2	0	2	2	OG0004748	TRINITY_DN4731_c3_g1	TRINITY_DN16290_c8_g4	TRINITY_DN45116_c7_g1	TRINITY_DN21383_c1_g1	TRINITY_DN19154_c5_g1	TRINITY_DN12888_c5_g1	TRINITY_DN18251_c2_g1	TRINITY_DN520_c7_g2	TRINITY_DN18792_c2_g1
OG0004812	NA	UP	NA	NA	UP	NA	NA	NA	NA	7	0	2	2	2	OG0004812	TRINITY_DN49722_c0_g1	TRINITY_DN1443_c0_g1			TRINITY_DN20858_c2_g1	TRINITY_DN11578_c0_g1	TRINITY_DN39610_c0_g1	TRINITY_DN2473_c0_g3	TRINITY_DN794_c0_g1
OG0005018	NA	NA	DW	NA	NA	NA	NA	DW	NA	7	2	0	2	2	OG0005018	TRINITY_DN586_c3_g2	TRINITY_DN18229_c6_g2	TRINITY_DN42312_c3_g8	TRINITY_DN23805_c4_g2	TRINITY_DN19238_c7_g2	TRINITY_DN17609_c3_g1	TRINITY_DN20974_c3_g2		TRINITY_DN23786_c5_g1
OG0005053	NA	NA	NA	NA	NA	NA	NA	DW	DW	7	2	0	2	2	OG0005053	TRINITY_DN6041_c0_g2	TRINITY_DN15769_c0_g1	TRINITY_DN41200_c0_g1	TRINITY_DN22205_c3_g3	TRINITY_DN20490_c7_g1	TRINITY_DN18550_c4_g1	TRINITY_DN1732_c0_g1	TRINITY_DN26993_c0_g1	TRINITY_DN21274_c3_g3
OG0005089	NA	NA	UP	NA	NA	NA	NA	UP	NA	7	0	2	2	2	OG0005089	TRINITY_DN6229_c1_g1	TRINITY_DN18093_c7_g1	TRINITY_DN46688_c5_g3	TRINITY_DN22394_c4_g7	TRINITY_DN24060_c6_g1	TRINITY_DN18641_c9_g2	TRINITY_DN20441_c3_g1	TRINITY_DN1941_c0_g1	TRINITY_DN20940_c6_g1
OG0005127	NA	NA	DW	NA	NA	NA	NA	DW	NA	7	2	0	2	2	OG0005127	TRINITY_DN6456_c0_g2	TRINITY_DN19032_c6_g2	TRINITY_DN43575_c6_g2	TRINITY_DN21908_c0_g1	TRINITY_DN20952_c2_g3	TRINITY_DN13404_c6_g7	TRINITY_DN17906_c11_g1		TRINITY_DN19877_c5_g1
OG0005215	NA	NA	NA	NA	DW	NA	NA	NA	DW	7	2	0	2	2	OG0005215	TRINITY_DN6974_c0_g2	TRINITY_DN17796_c6_g1	TRINITY_DN42717_c0_g1	TRINITY_DN23890_c3_g2	TRINITY_DN24874_c8_g3	TRINITY_DN15550_c1_g1	TRINITY_DN19990_c4_g3	TRINITY_DN1536_c0_g3	TRINITY_DN18639_c3_g1
OG0005217	NA	NA	DW	NA	NA	NA	NA	DW	NA	7	2	0	2	2	OG0005217	TRINITY_DN697_c0_g4	TRINITY_DN18187_c4_g6	TRINITY_DN45180_c3_g2	TRINITY_DN22995_c3_g2	TRINITY_DN21938_c4_g1	TRINITY_DN19860_c5_g1	TRINITY_DN20783_c3_g1		TRINITY_DN23341_c6_g1
OG0005260	NA	NA	NA	NA	NA	NA	NA	DW	DW	7	2	0	2	2	OG0005260	TRINITY_DN7197_c1_g1	TRINITY_DN19141_c0_g1	TRINITY_DN63363_c0_g1	TRINITY_DN22628_c6_g1	TRINITY_DN20668_c8_g3		TRINITY_DN17973_c11_g2		TRINITY_DN22174_c5_g3
OG0005277	NA	NA	NA	NA	UP	NA	NA	NA	UP	7	0	2	2	2	OG0005277	TRINITY_DN732_c0_g2	TRINITY_DN19298_c7_g3	TRINITY_DN46281_c0_g1	TRINITY_DN22493_c1_g3	TRINITY_DN23050_c4_g1	TRINITY_DN18278_c1_g1	TRINITY_DN17995_c0_g1	TRINITY_DN2484_c0_g2	TRINITY_DN20741_c2_g1
OG0005278	NA	NA	NA	NA	DW	NA	NA	DW	NA	7	2	0	2	2	OG0005278	TRINITY_DN7336_c1_g1	TRINITY_DN19332_c3_g3		TRINITY_DN21639_c10_g1	TRINITY_DN19735_c0_g1		TRINITY_DN21092_c8_g2	TRINITY_DN377_c0_g1	TRINITY_DN18897_c4_g1
OG0005336	NA	NA	DW	NA	NA	NA	NA	DW	NA	7	2	0	2	2	OG0005336	TRINITY_DN7695_c2_g1	TRINITY_DN16231_c3_g4	TRINITY_DN23789_c0_g2	TRINITY_DN24048_c8_g1	TRINITY_DN19296_c7_g3	TRINITY_DN12439_c8_g1	TRINITY_DN17768_c5_g1		TRINITY_DN51897_c0_g1
OG0005357	NA	NA	NA	NA	NA	NA	NA	DW	DW	7	2	0	2	2	OG0005357	TRINITY_DN784_c6_g1	TRINITY_DN18775_c4_g1	TRINITY_DN47523_c1_g1	TRINITY_DN23037_c11_g2	TRINITY_DN24138_c2_g1	TRINITY_DN18088_c3_g1	TRINITY_DN17532_c2_g6		TRINITY_DN22040_c3_g3
OG0005532	NA	NA	UP	NA	NA	UP	NA	NA	NA	7	0	2	2	2	OG0005532	TRINITY_DN903_c0_g1	TRINITY_DN17217_c5_g1	TRINITY_DN45511_c15_g1	TRINITY_DN22332_c8_g1	TRINITY_DN18358_c7_g1	TRINITY_DN12188_c0_g1	TRINITY_DN19835_c3_g1	TRINITY_DN7527_c1_g2	TRINITY_DN19797_c6_g3
OG0005588	UP	NA	UP	NA	NA	NA	NA	NA	NA	7	0	2	2	2	OG0005588	TRINITY_DN949_c0_g2	TRINITY_DN18940_c14_g1	TRINITY_DN45560_c7_g1	TRINITY_DN23852_c11_g1	TRINITY_DN22517_c7_g2	TRINITY_DN13402_c6_g2	TRINITY_DN19814_c6_g1	TRINITY_DN503_c10_g1
OG0005630	NA	NA	NA	NA	NA	NA	NA	UP	UP	7	0	2	2	2	OG0005630	TRINITY_DN97_c24_g1	TRINITY_DN17011_c2_g1	TRINITY_DN45978_c5_g1	TRINITY_DN23502_c4_g2	TRINITY_DN24564_c7_g1	TRINITY_DN20515_c5_g1	TRINITY_DN19144_c7_g1	TRINITY_DN124_c4_g5	TRINITY_DN19891_c4_g3
OG0005651	NA	NA	DW	NA	NA	NA	NA	DW	NA	7	2	0	2	2	OG0005651	TRINITY_DN9985_c1_g1		TRINITY_DN39538_c0_g1	TRINITY_DN20662_c0_g1	TRINITY_DN19882_c6_g1	TRINITY_DN18265_c8_g1	TRINITY_DN18335_c13_g2		TRINITY_DN23733_c0_g2
OG0005664	NA	NA	DW	NA	NA	NA	NA	DW	NA	7	2	0	2	2	OG0005664		TRINITY_DN44790_c0_g1	TRINITY_DN15504_c0_g1	TRINITY_DN58312_c0_g1	TRINITY_DN19238_c0_g1	TRINITY_DN20920_c2_g2	TRINITY_DN14520_c0_g2	TRINITY_DN339_c1_g1	TRINITY_DN18191_c0_g2
OG0005666	NA	NA	UP	NA	UP	NA	NA	NA	NA	7	0	2	2	2	OG0005666		TRINITY_DN14277_c0_g1	TRINITY_DN48547_c8_g2	TRINITY_DN21788_c5_g1	TRINITY_DN21256_c4_g1	TRINITY_DN20871_c3_g1	TRINITY_DN873_c0_g1	TRINITY_DN6049_c8_g1	TRINITY_DN20561_c4_g1
OG0005669	NA	NA	UP	NA	UP	NA	NA	NA	NA	7	0	2	2	2	OG0005669		TRINITY_DN14690_c0_g1	TRINITY_DN41734_c6_g1		TRINITY_DN18753_c8_g1	TRINITY_DN4892_c0_g2	TRINITY_DN17948_c1_g2	TRINITY_DN15128_c1_g1	TRINITY_DN19108_c6_g2
OG0005751	NA	NA	DW	NA	NA	NA	NA	DW	NA	7	2	0	2	2	OG0005751		TRINITY_DN37918_c0_g1	TRINITY_DN1079_c0_g1	TRINITY_DN2103_c0_g1	TRINITY_DN10822_c0_g1	TRINITY_DN14413_c1_g1	TRINITY_DN41431_c0_g1		TRINITY_DN20472_c3_g2
OG0005762	NA	NA	DW	DW	NA	NA	NA	NA	NA	7	2	0	2	2	OG0005762			TRINITY_DN31671_c0_g1	TRINITY_DN8928_c0_g2	TRINITY_DN17319_c0_g1	TRINITY_DN31209_c0_g1	TRINITY_DN39195_c0_g1	TRINITY_DN1044_c5_g1	TRINITY_DN23461_c5_g3
OG0005813	NA	NA	NA	NA	UP	NA	NA	UP	NA	7	0	2	2	2	OG0005813	TRINITY_DN10615_c0_g2	TRINITY_DN17472_c7_g6	TRINITY_DN42412_c0_g1	TRINITY_DN23674_c1_g1	TRINITY_DN17025_c0_g1		TRINITY_DN16694_c0_g1	TRINITY_DN3512_c3_g2	TRINITY_DN18352_c11_g2
OG0005857	NA	NA	DW	NA	NA	NA	NA	DW	NA	7	2	0	2	2	OG0005857	TRINITY_DN114_c12_g2	TRINITY_DN16252_c3_g3	TRINITY_DN45823_c0_g1	TRINITY_DN24194_c2_g4	TRINITY_DN19923_c4_g1	TRINITY_DN18225_c5_g1	TRINITY_DN18083_c5_g1		TRINITY_DN18963_c7_g2
OG0005866	NA	NA	DW	NA	NA	NA	NA	DW	NA	7	2	0	2	2	OG0005866	TRINITY_DN11726_c0_g1	TRINITY_DN41710_c0_g1	TRINITY_DN70782_c0_g1	TRINITY_DN21856_c11_g5	TRINITY_DN34958_c0_g1	TRINITY_DN13263_c4_g3	TRINITY_DN24133_c0_g1
OG0005867	NA	NA	DW	NA	NA	NA	NA	DW	NA	7	2	0	2	2	OG0005867	TRINITY_DN1172_c0_g2	TRINITY_DN19636_c7_g4	TRINITY_DN45105_c3_g1	TRINITY_DN22221_c5_g1	TRINITY_DN21154_c4_g1	TRINITY_DN13241_c5_g2	TRINITY_DN19415_c10_g1		TRINITY_DN21227_c3_g1
OG0005957	NA	NA	NA	NA	NA	NA	NA	UP	UP	7	0	2	2	2	OG0005957	TRINITY_DN13395_c0_g1	TRINITY_DN14562_c0_g1	TRINITY_DN24955_c0_g1	TRINITY_DN17978_c0_g1	TRINITY_DN23622_c1_g2		TRINITY_DN14899_c0_g1	TRINITY_DN22598_c0_g2	TRINITY_DN17634_c0_g1
OG0005966	NA	NA	DW	NA	NA	NA	NA	DW	NA	7	2	0	2	2	OG0005966	TRINITY_DN13532_c7_g1	TRINITY_DN28507_c0_g1	TRINITY_DN43181_c0_g1	TRINITY_DN24596_c0_g2	TRINITY_DN22041_c1_g1	TRINITY_DN14405_c7_g1	TRINITY_DN19144_c7_g6		TRINITY_DN17424_c0_g1
OG0005991	NA	NA	UP	NA	NA	NA	NA	UP	NA	7	0	2	2	2	OG0005991	TRINITY_DN14092_c0_g1	TRINITY_DN17341_c1_g9	TRINITY_DN4755_c0_g1	TRINITY_DN57019_c0_g1	TRINITY_DN15425_c0_g1		TRINITY_DN7702_c0_g1	TRINITY_DN4776_c0_g3	TRINITY_DN20721_c12_g1
OG0006033	NA	NA	DW	NA	NA	NA	NA	DW	NA	7	2	0	2	2	OG0006033	TRINITY_DN15335_c1_g1		TRINITY_DN43166_c0_g2	TRINITY_DN20719_c0_g1	TRINITY_DN22677_c9_g1	TRINITY_DN13608_c5_g1	TRINITY_DN9676_c0_g1	TRINITY_DN7001_c0_g2
OG0006042	NA	NA	DW	NA	NA	NA	NA	DW	NA	7	2	0	2	2	OG0006042	TRINITY_DN15525_c0_g2	TRINITY_DN18995_c4_g1	TRINITY_DN42310_c7_g1	TRINITY_DN21764_c6_g8	TRINITY_DN19061_c5_g1	TRINITY_DN12636_c7_g1	TRINITY_DN20952_c3_g2		TRINITY_DN20887_c13_g1
OG0006138	NA	NA	NA	NA	NA	NA	NA	DW	DW	7	2	0	2	2	OG0006138	TRINITY_DN183_c2_g1	TRINITY_DN19373_c3_g1	TRINITY_DN48931_c1_g1	TRINITY_DN23700_c4_g1	TRINITY_DN24820_c0_g2	TRINITY_DN20449_c1_g1	TRINITY_DN20424_c0_g1		TRINITY_DN22788_c0_g2
OG0006139	NA	NA	UP	NA	UP	NA	NA	NA	NA	7	0	2	2	2	OG0006139	TRINITY_DN1840_c1_g1		TRINITY_DN46522_c8_g1	TRINITY_DN22443_c4_g1	TRINITY_DN23458_c4_g2	TRINITY_DN12672_c6_g4	TRINITY_DN20977_c4_g5	TRINITY_DN613_c0_g3	TRINITY_DN23827_c9_g1
OG0006190	NA	NA	DW	NA	NA	NA	NA	DW	NA	7	2	0	2	2	OG0006190	TRINITY_DN1998_c6_g1	TRINITY_DN16846_c3_g4	TRINITY_DN43676_c7_g1	TRINITY_DN22608_c6_g1	TRINITY_DN24923_c3_g1	TRINITY_DN15136_c7_g2	TRINITY_DN18459_c3_g1
OG0006217	UP	NA	UP	NA	NA	NA	NA	NA	NA	7	0	2	2	2	OG0006217	TRINITY_DN20781_c0_g2	TRINITY_DN15829_c0_g2	TRINITY_DN39630_c0_g1	TRINITY_DN1033_c0_g1	TRINITY_DN22116_c11_g3		TRINITY_DN16622_c0_g1	TRINITY_DN1081_c9_g1	TRINITY_DN22252_c5_g9
OG0006251	NA	NA	NA	NA	NA	NA	NA	DW	DW	7	2	0	2	2	OG0006251	TRINITY_DN22468_c1_g1	TRINITY_DN39749_c0_g1	TRINITY_DN18399_c0_g1	TRINITY_DN23974_c3_g2	TRINITY_DN21926_c7_g3	TRINITY_DN17743_c4_g1	TRINITY_DN43086_c0_g1		TRINITY_DN19416_c4_g2
OG0006253	NA	NA	NA	NA	UP	NA	NA	UP	NA	7	0	2	2	2	OG0006253	TRINITY_DN2247_c2_g2	TRINITY_DN15632_c0_g1	TRINITY_DN40464_c0_g1	TRINITY_DN19268_c0_g2	TRINITY_DN22710_c1_g1	TRINITY_DN19112_c1_g2		TRINITY_DN6984_c0_g1
OG0006255	NA	NA	NA	UP	NA	NA	NA	NA	UP	7	0	2	2	2	OG0006255	TRINITY_DN224_c1_g1	TRINITY_DN15281_c0_g1	TRINITY_DN40625_c0_g1	TRINITY_DN18194_c0_g1	TRINITY_DN17039_c0_g1		TRINITY_DN16734_c0_g1	TRINITY_DN13038_c0_g2	TRINITY_DN23334_c4_g5
OG0006272	NA	NA	DW	NA	NA	NA	NA	DW	NA	7	2	0	2	2	OG0006272	TRINITY_DN2289_c0_g2	TRINITY_DN17263_c10_g1	TRINITY_DN41545_c0_g1	TRINITY_DN22293_c6_g1	TRINITY_DN24100_c2_g1	TRINITY_DN20304_c3_g1	TRINITY_DN20662_c8_g1		TRINITY_DN19326_c5_g1
OG0006419	NA	DW	NA	NA	NA	NA	NA	DW	NA	7	2	0	2	2	OG0006419	TRINITY_DN495_c3_g2	TRINITY_DN10042_c0_g2	TRINITY_DN45438_c5_g1	TRINITY_DN24096_c7_g2	TRINITY_DN18303_c8_g2		TRINITY_DN18492_c12_g1		TRINITY_DN23406_c11_g1
OG0006484	NA	NA	DW	NA	NA	NA	NA	DW	NA	7	2	0	2	2	OG0006484	TRINITY_DN3285_c4_g1	TRINITY_DN17615_c6_g2	TRINITY_DN45315_c5_g2	TRINITY_DN21879_c6_g1	TRINITY_DN18722_c6_g1	TRINITY_DN18251_c0_g1	TRINITY_DN20305_c11_g10		TRINITY_DN19167_c9_g1
OG0006485	NA	NA	DW	NA	NA	NA	NA	DW	NA	7	2	0	2	2	OG0006485	TRINITY_DN3287_c11_g1		TRINITY_DN36637_c0_g2	TRINITY_DN10679_c0_g1	TRINITY_DN18621_c5_g1	TRINITY_DN16727_c5_g1	TRINITY_DN17848_c2_g8		TRINITY_DN22215_c4_g1
OG0006490	NA	NA	DW	NA	NA	NA	NA	DW	NA	7	2	0	2	2	OG0006490	TRINITY_DN3331_c3_g1	TRINITY_DN18588_c4_g2	TRINITY_DN43430_c11_g3	TRINITY_DN24422_c3_g2	TRINITY_DN18421_c1_g1	TRINITY_DN12525_c4_g1	TRINITY_DN21107_c2_g1		TRINITY_DN18548_c0_g8
OG0006491	NA	UP	NA	NA	NA	NA	NA	UP	NA	7	0	2	2	2	OG0006491	TRINITY_DN33337_c0_g1	TRINITY_DN16681_c6_g1	TRINITY_DN47954_c0_g1	TRINITY_DN23071_c0_g1	TRINITY_DN24357_c6_g1		TRINITY_DN20194_c8_g1	TRINITY_DN3515_c4_g1	TRINITY_DN23555_c3_g1
OG0006600	NA	NA	DW	NA	NA	NA	NA	DW	NA	7	2	0	2	2	OG0006600	TRINITY_DN412_c2_g1	TRINITY_DN18942_c3_g1	TRINITY_DN43730_c0_g2	TRINITY_DN22971_c10_g1	TRINITY_DN21807_c4_g1	TRINITY_DN18234_c5_g2	TRINITY_DN19386_c6_g2		TRINITY_DN23766_c3_g1
OG0006643	NA	NA	NA	DW	NA	NA	NA	DW	NA	7	2	0	2	2	OG0006643	TRINITY_DN43_c0_g2	TRINITY_DN19030_c8_g2	TRINITY_DN45151_c5_g1	TRINITY_DN25314_c0_g1	TRINITY_DN19254_c2_g1	TRINITY_DN21160_c7_g1			TRINITY_DN22136_c1_g1
OG0006647	NA	NA	DW	NA	NA	NA	NA	DW	NA	7	2	0	2	2	OG0006647	TRINITY_DN4427_c0_g2	TRINITY_DN18261_c12_g1	TRINITY_DN40302_c0_g1	TRINITY_DN22747_c8_g2	TRINITY_DN22446_c6_g2	TRINITY_DN15425_c3_g1	TRINITY_DN21086_c2_g1		TRINITY_DN18556_c7_g2
OG0006689	NA	NA	DW	NA	NA	NA	NA	DW	NA	7	2	0	2	2	OG0006689	TRINITY_DN4674_c0_g2	TRINITY_DN19319_c2_g16	TRINITY_DN48197_c0_g4	TRINITY_DN22036_c1_g1	TRINITY_DN23835_c2_g2	TRINITY_DN12295_c5_g2	TRINITY_DN17847_c6_g4
OG0006718	NA	NA	NA	NA	NA	NA	NA	DW	DW	7	2	0	2	2	OG0006718	TRINITY_DN4884_c3_g1	TRINITY_DN15605_c0_g1	TRINITY_DN44242_c0_g1	TRINITY_DN22370_c9_g1	TRINITY_DN18016_c0_g1	TRINITY_DN14010_c2_g1	TRINITY_DN16313_c0_g1		TRINITY_DN22892_c3_g1
OG0006742	NA	NA	NA	UP	NA	NA	NA	NA	UP	7	0	2	2	2	OG0006742	TRINITY_DN50746_c0_g1	TRINITY_DN29044_c0_g1		TRINITY_DN42804_c0_g1	TRINITY_DN28777_c0_g1	TRINITY_DN11055_c0_g1	TRINITY_DN8040_c0_g1	TRINITY_DN5802_c0_g1	TRINITY_DN22370_c4_g3
OG0006817	NA	NA	DW	NA	NA	NA	NA	DW	NA	7	2	0	2	2	OG0006817	TRINITY_DN570_c1_g1	TRINITY_DN19478_c11_g2	TRINITY_DN47805_c8_g1	TRINITY_DN22922_c8_g1	TRINITY_DN20891_c8_g1	TRINITY_DN15302_c5_g1	TRINITY_DN19523_c8_g1		TRINITY_DN20499_c6_g1
OG0006841	DW	NA	NA	NA	NA	NA	NA	DW	NA	7	2	0	2	2	OG0006841	TRINITY_DN5933_c6_g1	TRINITY_DN19300_c3_g1	TRINITY_DN40226_c0_g1	TRINITY_DN23864_c2_g1	TRINITY_DN20735_c5_g1	TRINITY_DN15413_c0_g1	TRINITY_DN17878_c3_g8		TRINITY_DN23042_c1_g1
OG0006948	DW	NA	NA	NA	NA	NA	NA	DW	NA	7	2	0	2	2	OG0006948	TRINITY_DN7028_c0_g2	TRINITY_DN18383_c6_g1	TRINITY_DN41884_c12_g1	TRINITY_DN24237_c7_g1	TRINITY_DN20294_c4_g1	TRINITY_DN19718_c4_g1	TRINITY_DN20000_c8_g3		TRINITY_DN633_c0_g1
OG0006992	NA	NA	DW	NA	NA	NA	NA	DW	NA	7	2	0	2	2	OG0006992	TRINITY_DN7665_c0_g1	TRINITY_DN19540_c2_g1	TRINITY_DN42177_c4_g8		TRINITY_DN21578_c8_g1	TRINITY_DN20011_c4_g1	TRINITY_DN16976_c0_g2		TRINITY_DN13807_c0_g1
OG0007000	NA	NA	DW	NA	NA	NA	NA	DW	NA	7	2	0	2	2	OG0007000	TRINITY_DN781_c0_g1	TRINITY_DN17768_c4_g2	TRINITY_DN45353_c0_g1	TRINITY_DN24737_c2_g1	TRINITY_DN21873_c6_g1	TRINITY_DN16807_c3_g1	TRINITY_DN18771_c2_g2		TRINITY_DN21184_c0_g1
OG0007164	NA	NA	DW	NA	NA	NA	NA	DW	NA	7	2	0	2	2	OG0007164		TRINITY_DN11256_c0_g1	TRINITY_DN28811_c0_g1	TRINITY_DN27086_c0_g1	TRINITY_DN21746_c1_g1	TRINITY_DN18861_c7_g3	TRINITY_DN17523_c1_g1		TRINITY_DN13176_c0_g1
OG0007192	NA	NA	UP	NA	NA	NA	NA	UP	NA	7	0	2	2	2	OG0007192		TRINITY_DN16669_c5_g1	TRINITY_DN45648_c0_g2	TRINITY_DN23570_c7_g1	TRINITY_DN19469_c6_g2	TRINITY_DN19376_c5_g1	TRINITY_DN20368_c5_g1	TRINITY_DN4375_c0_g1	TRINITY_DN29552_c0_g1
OG0007200	NA	NA	NA	NA	NA	NA	NA	UP	UP	7	0	2	2	2	OG0007200		TRINITY_DN16789_c2_g1	TRINITY_DN41428_c3_g1	TRINITY_DN22866_c10_g1	TRINITY_DN24153_c5_g1	TRINITY_DN15110_c6_g1	TRINITY_DN20404_c3_g7	TRINITY_DN58_c13_g1	TRINITY_DN21757_c8_g1
OG0007210	NA	NA	NA	NA	DW	NA	NA	DW	NA	7	2	0	2	2	OG0007210		TRINITY_DN16991_c6_g1	TRINITY_DN8151_c0_g1	TRINITY_DN8692_c0_g1	TRINITY_DN18769_c10_g1	TRINITY_DN14637_c0_g1	TRINITY_DN1705_c0_g1		TRINITY_DN22670_c12_g1
OG0007241	NA	NA	DW	NA	NA	NA	NA	DW	NA	7	2	0	2	2	OG0007241		TRINITY_DN17653_c5_g1	TRINITY_DN35450_c0_g1	TRINITY_DN49601_c0_g1	TRINITY_DN17501_c0_g1	TRINITY_DN17086_c1_g1	TRINITY_DN15790_c0_g2	TRINITY_DN152_c8_g2	TRINITY_DN21598_c1_g2
OG0007242	NA	NA	DW	NA	NA	NA	NA	DW	NA	7	2	0	2	2	OG0007242		TRINITY_DN17655_c4_g1	TRINITY_DN38705_c0_g2	TRINITY_DN22734_c9_g2	TRINITY_DN17967_c0_g1	TRINITY_DN19334_c1_g1	TRINITY_DN16484_c0_g1		TRINITY_DN56156_c0_g1
OG0007247	NA	NA	DW	NA	DW	NA	NA	NA	NA	7	2	0	2	2	OG0007247		TRINITY_DN17825_c4_g9	TRINITY_DN5930_c0_g1		TRINITY_DN19568_c3_g1	TRINITY_DN21060_c4_g1	TRINITY_DN17865_c2_g3	TRINITY_DN61479_c0_g1	TRINITY_DN21491_c7_g2
OG0007290	NA	NA	NA	NA	NA	NA	NA	DW	DW	7	2	0	2	2	OG0007290		TRINITY_DN18794_c3_g1	TRINITY_DN44570_c0_g1	TRINITY_DN22438_c5_g1	TRINITY_DN21182_c0_g1	TRINITY_DN20228_c7_g1	TRINITY_DN18471_c7_g1		TRINITY_DN21789_c5_g1
OG0007473	NA	NA	NA	NA	DW	NA	NA	DW	NA	7	2	0	2	2	OG0007473	TRINITY_DN1161_c0_g1	TRINITY_DN18222_c4_g3	TRINITY_DN42289_c5_g2		TRINITY_DN21693_c6_g3	TRINITY_DN18351_c6_g3	TRINITY_DN21258_c10_g3		TRINITY_DN20519_c0_g4
OG0007690	NA	NA	DW	NA	NA	NA	NA	DW	NA	7	2	0	2	2	OG0007690	TRINITY_DN2208_c6_g1	TRINITY_DN18807_c8_g3	TRINITY_DN46347_c8_g6	TRINITY_DN17469_c0_g1	TRINITY_DN18606_c11_g4	TRINITY_DN17962_c12_g7			TRINITY_DN20296_c4_g1
OG0007743	UP	NA	UP	NA	NA	NA	NA	NA	NA	7	0	2	2	2	OG0007743	TRINITY_DN24927_c0_g2	TRINITY_DN13676_c0_g1	TRINITY_DN38823_c0_g1	TRINITY_DN20699_c0_g1	TRINITY_DN23611_c8_g2		TRINITY_DN17781_c10_g1	TRINITY_DN1693_c0_g2
OG0007767	NA	NA	NA	NA	UP	NA	NA	UP	NA	7	0	2	2	2	OG0007767	TRINITY_DN26236_c1_g1	TRINITY_DN35878_c0_g1			TRINITY_DN18506_c4_g1	TRINITY_DN15508_c2_g1	TRINITY_DN20864_c2_g1	TRINITY_DN1715_c5_g1	TRINITY_DN20598_c7_g1
OG0007770	NA	NA	DW	NA	NA	NA	NA	DW	NA	7	2	0	2	2	OG0007770	TRINITY_DN2675_c11_g1	TRINITY_DN17257_c4_g1	TRINITY_DN46166_c3_g1	TRINITY_DN14202_c0_g1	TRINITY_DN25289_c3_g1	TRINITY_DN14370_c6_g4	TRINITY_DN21362_c1_g4
OG0007781	NA	NA	DW	NA	NA	NA	NA	DW	NA	7	2	0	2	2	OG0007781	TRINITY_DN2758_c2_g1		TRINITY_DN45179_c0_g1	TRINITY_DN21417_c0_g1	TRINITY_DN23222_c1_g1	TRINITY_DN19409_c2_g1	TRINITY_DN18912_c1_g1		TRINITY_DN18658_c4_g4
OG0007906	NA	NA	NA	NA	UP	NA	NA	NA	UP	7	0	2	2	2	OG0007906	TRINITY_DN40601_c0_g1	TRINITY_DN34524_c0_g1			TRINITY_DN24124_c4_g1	TRINITY_DN19922_c5_g1	TRINITY_DN2540_c0_g1	TRINITY_DN41139_c1_g1	TRINITY_DN19660_c3_g1
OG0007918	DW	NA	NA	NA	NA	NA	NA	DW	NA	7	2	0	2	2	OG0007918	TRINITY_DN4129_c2_g1		TRINITY_DN32423_c0_g1	TRINITY_DN23458_c2_g1	TRINITY_DN21736_c5_g2	TRINITY_DN16233_c2_g3	TRINITY_DN20527_c2_g3		TRINITY_DN28470_c0_g1
OG0007923	NA	NA	DW	NA	NA	NA	NA	DW	NA	7	2	0	2	2	OG0007923	TRINITY_DN4139_c9_g1	TRINITY_DN19441_c2_g1	TRINITY_DN44426_c0_g1	TRINITY_DN21551_c0_g2	TRINITY_DN16346_c0_g1	TRINITY_DN18332_c3_g1	TRINITY_DN18887_c2_g4
OG0007940	NA	NA	DW	NA	NA	NA	NA	DW	NA	7	2	0	2	2	OG0007940	TRINITY_DN43_c1_g1	TRINITY_DN17064_c3_g1	TRINITY_DN44438_c0_g1	TRINITY_DN23222_c4_g1	TRINITY_DN21860_c5_g1	TRINITY_DN12042_c0_g1	TRINITY_DN18869_c12_g1
OG0007961	NA	NA	DW	NA	NA	NA	NA	DW	NA	7	2	0	2	2	OG0007961	TRINITY_DN46116_c0_g1	TRINITY_DN17435_c5_g2	TRINITY_DN47944_c2_g4		TRINITY_DN24073_c9_g7	TRINITY_DN20543_c9_g3	TRINITY_DN15845_c0_g1		TRINITY_DN22367_c12_g1
OG0007973	DW	NA	NA	NA	NA	NA	NA	DW	NA	7	2	0	2	2	OG0007973	TRINITY_DN469_c0_g6	TRINITY_DN16135_c7_g6	TRINITY_DN41865_c5_g1	TRINITY_DN22211_c7_g3	TRINITY_DN24146_c10_g1	TRINITY_DN18107_c6_g2	TRINITY_DN19437_c8_g1
OG0007979	NA	NA	DW	NA	NA	NA	NA	DW	NA	7	2	0	2	2	OG0007979	TRINITY_DN4749_c2_g3	TRINITY_DN19057_c4_g3	TRINITY_DN43466_c0_g2	TRINITY_DN24751_c2_g1		TRINITY_DN17163_c13_g1	TRINITY_DN18649_c8_g1		TRINITY_DN18044_c6_g5
OG0007981	DW	NA	NA	NA	NA	NA	NA	DW	NA	7	2	0	2	2	OG0007981	TRINITY_DN4790_c0_g1	TRINITY_DN19276_c5_g1	TRINITY_DN46676_c2_g1	TRINITY_DN23943_c4_g6	TRINITY_DN24521_c3_g1		TRINITY_DN20855_c9_g1		TRINITY_DN19368_c4_g3
OG0008002	NA	NA	DW	NA	NA	NA	NA	DW	NA	7	2	0	2	2	OG0008002	TRINITY_DN5094_c0_g1	TRINITY_DN18615_c1_g1	TRINITY_DN41040_c4_g4	TRINITY_DN21801_c13_g1		TRINITY_DN13689_c10_g1	TRINITY_DN18095_c8_g6		TRINITY_DN20404_c12_g1
OG0008107	NA	NA	NA	NA	DW	NA	NA	DW	NA	7	2	0	2	2	OG0008107	TRINITY_DN6987_c0_g2		TRINITY_DN39825_c0_g1	TRINITY_DN20412_c0_g1	TRINITY_DN20900_c2_g1	TRINITY_DN16831_c2_g1	TRINITY_DN11996_c0_g1		TRINITY_DN22628_c2_g1
OG0008109	DW	NA	NA	NA	NA	NA	NA	DW	NA	7	2	0	2	2	OG0008109	TRINITY_DN7009_c6_g1	TRINITY_DN17696_c1_g1	TRINITY_DN42973_c6_g2		TRINITY_DN25348_c3_g1	TRINITY_DN18047_c4_g2	TRINITY_DN18751_c3_g1		TRINITY_DN23400_c4_g1
OG0008129	DW	NA	NA	NA	NA	NA	NA	DW	NA	7	2	0	2	2	OG0008129	TRINITY_DN7604_c5_g1	TRINITY_DN18257_c8_g1	TRINITY_DN39531_c0_g2	TRINITY_DN21584_c8_g9	TRINITY_DN24432_c0_g1	TRINITY_DN15330_c8_g1	TRINITY_DN20038_c2_g1
OG0008265	NA	NA	DW	NA	NA	NA	NA	DW	NA	7	2	0	2	2	OG0008265		TRINITY_DN16656_c7_g1	TRINITY_DN34177_c0_g2	TRINITY_DN21956_c7_g2	TRINITY_DN22013_c7_g7	TRINITY_DN16969_c6_g2	TRINITY_DN18017_c3_g1		TRINITY_DN20574_c6_g1
OG0008346	NA	NA	DW	NA	NA	NA	NA	DW	NA	7	2	0	2	2	OG0008346		TRINITY_DN18395_c2_g18	TRINITY_DN46046_c6_g2	TRINITY_DN42965_c0_g1	TRINITY_DN22801_c1_g1	TRINITY_DN11946_c0_g2	TRINITY_DN18665_c5_g1		TRINITY_DN54043_c0_g1
OG0008355	NA	NA	DW	NA	NA	NA	NA	DW	NA	7	2	0	2	2	OG0008355		TRINITY_DN18471_c5_g1	TRINITY_DN47553_c1_g2	TRINITY_DN22629_c9_g1	TRINITY_DN18555_c4_g3	TRINITY_DN19408_c6_g5	TRINITY_DN19234_c5_g8		TRINITY_DN23403_c8_g1
OG0008427	NA	NA	DW	NA	NA	NA	NA	DW	NA	7	2	0	2	2	OG0008427		TRINITY_DN20722_c0_g1	TRINITY_DN39696_c0_g1	TRINITY_DN6055_c0_g1	TRINITY_DN4843_c0_g1	TRINITY_DN12536_c3_g2	TRINITY_DN2119_c0_g1		TRINITY_DN17903_c0_g1
OG0008466	NA	NA	DW	NA	NA	NA	NA	DW	NA	7	2	0	2	2	OG0008466		TRINITY_DN5991_c0_g1	TRINITY_DN46619_c0_g2	TRINITY_DN22683_c7_g1	TRINITY_DN43930_c0_g1	TRINITY_DN14071_c4_g1	TRINITY_DN19071_c9_g4		TRINITY_DN18232_c3_g6
OG0000217	NA	NA	UP	DW	NA	NA	NA	NA	NA	7	1	1	1	2	OG0000217	TRINITY_DN1070_c0_g2	TRINITY_DN15323_c0_g1	TRINITY_DN61924_c0_g1	TRINITY_DN35965_c0_g1	TRINITY_DN18103_c6_g4	TRINITY_DN20497_c11_g1	TRINITY_DN13985_c0_g1	TRINITY_DN3104_c1_g2	TRINITY_DN21830_c2_g1
OG0000303	NA	NA	DW	NA	UP	NA	NA	NA	NA	7	1	1	1	2	OG0000303		TRINITY_DN5179_c0_g1	TRINITY_DN26416_c0_g1	TRINITY_DN21998_c7_g1	TRINITY_DN16928_c0_g1	TRINITY_DN17731_c6_g5	TRINITY_DN18132_c6_g2	TRINITY_DN36212_c2_g1	TRINITY_DN18960_c3_g3
OG0000345	NA	NA	UP	DW	NA	NA	NA	NA	NA	7	1	1	1	2	OG0000345	TRINITY_DN629_c0_g1	TRINITY_DN19695_c5_g1	TRINITY_DN42445_c0_g1	TRINITY_DN21314_c0_g1	TRINITY_DN19011_c4_g1	TRINITY_DN20738_c6_g1	TRINITY_DN20709_c1_g2	TRINITY_DN241_c0_g1	TRINITY_DN19972_c5_g1
OG0000417	NA	NA	UP	NA	NA	NA	NA	NA	DW	7	1	1	1	2	OG0000417	TRINITY_DN1064_c6_g1	TRINITY_DN19308_c2_g1	TRINITY_DN46678_c0_g1	TRINITY_DN23456_c10_g1	TRINITY_DN24500_c3_g1	TRINITY_DN19410_c7_g1	TRINITY_DN17393_c0_g1	TRINITY_DN2567_c0_g4	TRINITY_DN22386_c4_g3
OG0000425	NA	NA	UP	DW	NA	NA	NA	NA	NA	7	1	1	1	2	OG0000425	TRINITY_DN13039_c8_g3		TRINITY_DN46051_c0_g1	TRINITY_DN24750_c1_g1	TRINITY_DN2947_c0_g1	TRINITY_DN12225_c0_g7	TRINITY_DN20217_c5_g1	TRINITY_DN19371_c5_g1	TRINITY_DN39268_c0_g1
OG0000430	NA	DW	UP	NA	NA	NA	NA	NA	NA	7	1	1	1	2	OG0000430	TRINITY_DN4783_c0_g1	TRINITY_DN17341_c1_g6	TRINITY_DN39577_c0_g1	TRINITY_DN23327_c5_g2	TRINITY_DN18399_c6_g1	TRINITY_DN20995_c4_g1	TRINITY_DN19936_c5_g2	TRINITY_DN185_c6_g1	TRINITY_DN22218_c5_g1
OG0000441	NA	NA	UP	NA	NA	NA	NA	DW	NA	7	1	1	1	2	OG0000441	TRINITY_DN20955_c9_g1	TRINITY_DN37634_c0_g1	TRINITY_DN46600_c1_g1	TRINITY_DN24615_c1_g1	TRINITY_DN51020_c0_g1	TRINITY_DN8699_c0_g1	TRINITY_DN31628_c0_g1	TRINITY_DN1002_c11_g1	TRINITY_DN20474_c2_g4
OG0000604	NA	NA	DW	NA	UP	NA	NA	NA	NA	7	1	1	1	2	OG0000604	TRINITY_DN16293_c2_g1	TRINITY_DN17403_c2_g1	TRINITY_DN42190_c0_g1	TRINITY_DN24135_c4_g2	TRINITY_DN16672_c0_g1	TRINITY_DN21203_c6_g2	TRINITY_DN11712_c0_g1	TRINITY_DN61257_c1_g1	TRINITY_DN18954_c4_g3
OG0000629	NA	NA	UP	DW	NA	NA	NA	NA	NA	7	1	1	1	2	OG0000629	TRINITY_DN37134_c1_g2	TRINITY_DN16262_c0_g1	TRINITY_DN44434_c4_g6	TRINITY_DN24376_c3_g3	TRINITY_DN19884_c9_g1	TRINITY_DN14093_c5_g2	TRINITY_DN19996_c1_g1	TRINITY_DN17979_c1_g2	TRINITY_DN21432_c5_g1
OG0000711	NA	NA	DW	NA	UP	NA	NA	NA	NA	7	1	1	1	2	OG0000711	TRINITY_DN11803_c0_g3	TRINITY_DN15312_c0_g1	TRINITY_DN60960_c0_g1	TRINITY_DN23097_c9_g2	TRINITY_DN21186_c3_g2	TRINITY_DN15416_c8_g2	TRINITY_DN17859_c5_g9	TRINITY_DN3528_c5_g1	TRINITY_DN20276_c5_g1
OG0000732	NA	NA	DW	NA	NA	NA	NA	NA	UP	7	1	1	1	2	OG0000732	TRINITY_DN512_c0_g1	TRINITY_DN17078_c5_g1	TRINITY_DN46889_c0_g1	TRINITY_DN22877_c2_g4	TRINITY_DN21796_c6_g1	TRINITY_DN21356_c7_g1		TRINITY_DN1509_c1_g2	TRINITY_DN20656_c9_g1
OG0000751	NA	NA	NA	NA	UP	NA	NA	DW	NA	7	1	1	1	2	OG0000751	TRINITY_DN23260_c0_g1	TRINITY_DN16250_c0_g1	TRINITY_DN75881_c0_g1	TRINITY_DN57682_c0_g1	TRINITY_DN11967_c0_g2	TRINITY_DN16255_c0_g4	TRINITY_DN11999_c0_g1		TRINITY_DN44559_c0_g1
OG0000760	NA	NA	DW	NA	NA	NA	NA	UP	NA	7	1	1	1	2	OG0000760	TRINITY_DN27636_c3_g1	TRINITY_DN24003_c0_g1	TRINITY_DN79176_c0_g1	TRINITY_DN35540_c0_g1	TRINITY_DN18718_c1_g1	TRINITY_DN304_c0_g1	TRINITY_DN43544_c0_g1	TRINITY_DN42217_c0_g1	TRINITY_DN21800_c6_g1
OG0000790	NA	NA	UP	NA	DW	NA	NA	NA	NA	7	1	1	1	2	OG0000790	TRINITY_DN4902_c1_g1	TRINITY_DN16266_c1_g1	TRINITY_DN38971_c0_g1	TRINITY_DN20867_c0_g1	TRINITY_DN19009_c4_g3		TRINITY_DN14348_c0_g2	TRINITY_DN498_c0_g1	TRINITY_DN22931_c5_g1
OG0000900	NA	NA	UP	NA	NA	NA	DW	NA	NA	7	1	1	1	2	OG0000900	TRINITY_DN16515_c2_g1	TRINITY_DN17584_c11_g2	TRINITY_DN41409_c2_g1	TRINITY_DN21771_c1_g2	TRINITY_DN46961_c0_g1	TRINITY_DN28350_c0_g1	TRINITY_DN19080_c3_g4	TRINITY_DN3679_c0_g1	TRINITY_DN21914_c5_g1
OG0000906	NA	NA	DW	NA	UP	NA	NA	NA	NA	7	1	1	1	2	OG0000906	TRINITY_DN1743_c0_g1	TRINITY_DN18465_c0_g1	TRINITY_DN44024_c7_g1	TRINITY_DN22039_c0_g1	TRINITY_DN21341_c0_g2	TRINITY_DN15764_c1_g1	TRINITY_DN18526_c0_g1	TRINITY_DN2270_c0_g1	TRINITY_DN20239_c4_g1
OG0000924	NA	NA	DW	NA	UP	NA	NA	NA	NA	7	1	1	1	2	OG0000924	TRINITY_DN2091_c1_g1	TRINITY_DN16046_c0_g2	TRINITY_DN43994_c0_g2	TRINITY_DN22919_c5_g1	TRINITY_DN20253_c4_g1	TRINITY_DN19112_c1_g1	TRINITY_DN20021_c2_g1	TRINITY_DN41412_c0_g2	TRINITY_DN23725_c4_g2
OG0000926	NA	NA	UP	NA	NA	NA	NA	NA	DW	7	1	1	1	2	OG0000926	TRINITY_DN21527_c0_g2	TRINITY_DN19485_c5_g2	TRINITY_DN44511_c0_g1	TRINITY_DN24944_c1_g3	TRINITY_DN19427_c8_g1	TRINITY_DN12084_c1_g1	TRINITY_DN17899_c0_g6	TRINITY_DN4201_c0_g3	TRINITY_DN21685_c4_g1
OG0000935	NA	NA	DW	NA	NA	NA	NA	NA	UP	7	1	1	1	2	OG0000935	TRINITY_DN23344_c0_g2	TRINITY_DN11509_c0_g2	TRINITY_DN57697_c0_g1	TRINITY_DN20264_c0_g1	TRINITY_DN23510_c3_g1	TRINITY_DN20915_c4_g1		TRINITY_DN13_c1_g1	TRINITY_DN21058_c2_g1
OG0000978	NA	NA	DW	NA	NA	NA	NA	UP	NA	7	1	1	1	2	OG0000978	TRINITY_DN3926_c0_g4	TRINITY_DN19675_c7_g12	TRINITY_DN41966_c0_g2	TRINITY_DN17219_c0_g1	TRINITY_DN25127_c6_g1	TRINITY_DN19004_c9_g1	TRINITY_DN4885_c0_g1	TRINITY_DN10624_c0_g1	TRINITY_DN18382_c6_g1
OG0000982	NA	NA	DW	UP	NA	NA	NA	NA	NA	7	1	1	1	2	OG0000982	TRINITY_DN40261_c2_g1	TRINITY_DN19282_c4_g8	TRINITY_DN31567_c0_g1	TRINITY_DN57972_c0_g1	TRINITY_DN19319_c11_g1	TRINITY_DN13353_c7_g1	TRINITY_DN20256_c4_g1	TRINITY_DN6538_c0_g1	TRINITY_DN22305_c6_g1
OG0001048	NA	NA	DW	NA	UP	NA	NA	NA	NA	7	1	1	1	2	OG0001048	TRINITY_DN8776_c0_g1	TRINITY_DN37931_c0_g1	TRINITY_DN45877_c0_g1	TRINITY_DN22637_c2_g1	TRINITY_DN21046_c2_g1	TRINITY_DN16381_c9_g1	TRINITY_DN20308_c4_g1	TRINITY_DN1748_c0_g1	TRINITY_DN18871_c1_g1
OG0001064	NA	NA	DW	NA	NA	NA	NA	NA	UP	7	1	1	1	2	OG0001064		TRINITY_DN16962_c1_g3	TRINITY_DN42716_c12_g1	TRINITY_DN22502_c11_g1	TRINITY_DN14801_c0_g1	TRINITY_DN18451_c7_g1	TRINITY_DN21012_c0_g1	TRINITY_DN2513_c1_g3	TRINITY_DN22370_c4_g8
OG0001137	NA	NA	DW	NA	NA	NA	NA	UP	NA	7	1	1	1	2	OG0001137	TRINITY_DN16068_c1_g1	TRINITY_DN16856_c0_g2	TRINITY_DN25874_c0_g2	TRINITY_DN24725_c4_g1	TRINITY_DN22319_c4_g2	TRINITY_DN13224_c4_g1	TRINITY_DN20641_c8_g1	TRINITY_DN2438_c1_g7	TRINITY_DN18804_c8_g1
OG0001139	NA	NA	DW	NA	NA	NA	NA	UP	NA	7	1	1	1	2	OG0001139	TRINITY_DN16271_c2_g1	TRINITY_DN42046_c0_g1	TRINITY_DN58239_c0_g1	TRINITY_DN55559_c0_g1	TRINITY_DN41415_c0_g1	TRINITY_DN11727_c0_g1		TRINITY_DN43432_c2_g1	TRINITY_DN21197_c10_g1
OG0001167	NA	NA	DW	UP	NA	NA	NA	NA	NA	7	1	1	1	2	OG0001167	TRINITY_DN20440_c0_g1	TRINITY_DN11791_c0_g1	TRINITY_DN31964_c1_g1	TRINITY_DN24700_c3_g2	TRINITY_DN12874_c0_g2	TRINITY_DN14273_c12_g1	TRINITY_DN23919_c0_g1	TRINITY_DN11321_c0_g1
OG0001196	NA	NA	NA	NA	UP	NA	NA	DW	NA	7	1	1	1	2	OG0001196	TRINITY_DN25064_c1_g1	TRINITY_DN15372_c0_g4	TRINITY_DN5945_c0_g1	TRINITY_DN24172_c11_g4	TRINITY_DN20735_c10_g1	TRINITY_DN16547_c2_g3	TRINITY_DN19467_c4_g1	TRINITY_DN28858_c2_g1	TRINITY_DN19675_c6_g2
OG0001214	NA	NA	DW	NA	UP	NA	NA	NA	NA	7	1	1	1	2	OG0001214	TRINITY_DN28070_c1_g1	TRINITY_DN12818_c0_g1	TRINITY_DN37710_c0_g1	TRINITY_DN23136_c6_g1	TRINITY_DN23025_c8_g1	TRINITY_DN20718_c9_g1	TRINITY_DN14142_c0_g2	TRINITY_DN4306_c0_g1	TRINITY_DN22349_c1_g1
OG0001246	NA	NA	UP	NA	NA	NA	NA	DW	NA	7	1	1	1	2	OG0001246	TRINITY_DN36765_c2_g1	TRINITY_DN1795_c0_g2	TRINITY_DN90873_c0_g1	TRINITY_DN36140_c0_g1	TRINITY_DN22903_c0_g1	TRINITY_DN11329_c0_g2	TRINITY_DN13728_c0_g2
OG0001259	NA	NA	UP	NA	NA	NA	NA	DW	NA	7	1	1	1	2	OG0001259	TRINITY_DN3972_c3_g1	TRINITY_DN16699_c1_g4	TRINITY_DN43661_c6_g3	TRINITY_DN21957_c6_g2	TRINITY_DN24223_c1_g1		TRINITY_DN21243_c6_g5		TRINITY_DN22427_c4_g2
OG0001278	NA	NA	DW	NA	UP	NA	NA	NA	NA	7	1	1	1	2	OG0001278	TRINITY_DN46081_c0_g1	TRINITY_DN16853_c0_g2	TRINITY_DN17279_c0_g1	TRINITY_DN42640_c0_g1	TRINITY_DN18722_c3_g1	TRINITY_DN12579_c1_g2	TRINITY_DN12923_c0_g1	TRINITY_DN61270_c0_g1	TRINITY_DN19043_c1_g1
OG0001279	NA	DW	UP	NA	NA	NA	NA	NA	NA	7	1	1	1	2	OG0001279	TRINITY_DN46276_c1_g1	TRINITY_DN19288_c8_g1	TRINITY_DN39687_c0_g1	TRINITY_DN20141_c0_g1	TRINITY_DN22974_c0_g2	TRINITY_DN15979_c7_g2	TRINITY_DN16629_c0_g1	TRINITY_DN687_c5_g1	TRINITY_DN19778_c3_g1
OG0001344	NA	NA	UP	NA	NA	NA	NA	NA	DW	7	1	1	1	2	OG0001344	TRINITY_DN7820_c0_g2	TRINITY_DN15677_c0_g1	TRINITY_DN37656_c0_g1	TRINITY_DN21571_c5_g1		TRINITY_DN20333_c4_g1	TRINITY_DN16544_c0_g1	TRINITY_DN2564_c4_g1	TRINITY_DN20586_c0_g1
OG0001366	NA	NA	DW	NA	UP	NA	NA	NA	NA	7	1	1	1	2	OG0001366	TRINITY_DN9346_c17_g1	TRINITY_DN13505_c0_g1	TRINITY_DN9355_c0_g1	TRINITY_DN3649_c0_g2	TRINITY_DN18296_c10_g1	TRINITY_DN15914_c5_g4	TRINITY_DN13136_c0_g2	TRINITY_DN11304_c0_g1	TRINITY_DN22484_c1_g1
OG0001374	NA	NA	NA	DW	NA	NA	NA	NA	UP	7	1	1	1	2	OG0001374		TRINITY_DN11646_c0_g1	TRINITY_DN62834_c0_g1	TRINITY_DN11405_c0_g1	TRINITY_DN12707_c0_g1	TRINITY_DN14310_c5_g1	TRINITY_DN37096_c0_g1	TRINITY_DN1438_c0_g1	TRINITY_DN18739_c5_g1
OG0001424	NA	NA	DW	NA	UP	NA	NA	NA	NA	7	1	1	1	2	OG0001424	TRINITY_DN106_c10_g2	TRINITY_DN17931_c2_g2	TRINITY_DN43706_c0_g1	TRINITY_DN24233_c3_g1	TRINITY_DN22957_c1_g1	TRINITY_DN17006_c7_g1	TRINITY_DN19650_c4_g1	TRINITY_DN3926_c2_g1	TRINITY_DN21903_c8_g2
OG0001455	NA	NA	UP	DW	NA	NA	NA	NA	NA	7	1	1	1	2	OG0001455	TRINITY_DN12314_c0_g3	TRINITY_DN35836_c0_g1	TRINITY_DN44559_c4_g2	TRINITY_DN22973_c6_g1	TRINITY_DN27932_c0_g1	TRINITY_DN25511_c0_g1	TRINITY_DN18154_c2_g2	TRINITY_DN10298_c0_g1	TRINITY_DN18896_c6_g3
OG0001462	NA	NA	UP	NA	NA	NA	NA	DW	NA	7	1	1	1	2	OG0001462	TRINITY_DN12886_c4_g2	TRINITY_DN18261_c5_g1	TRINITY_DN46878_c4_g2	TRINITY_DN23941_c10_g1	TRINITY_DN4280_c0_g1	TRINITY_DN8592_c0_g1	TRINITY_DN41893_c0_g1		TRINITY_DN18479_c5_g1
OG0001465	UP	NA	NA	NA	NA	NA	NA	DW	NA	7	1	1	1	2	OG0001465	TRINITY_DN25150_c0_g1		TRINITY_DN41285_c5_g1	TRINITY_DN23282_c5_g1	TRINITY_DN22217_c3_g1	TRINITY_DN16108_c0_g3	TRINITY_DN21208_c6_g1		TRINITY_DN4999_c0_g1
OG0001511	NA	NA	DW	NA	UP	NA	NA	NA	NA	7	1	1	1	2	OG0001511	TRINITY_DN1660_c8_g2	TRINITY_DN18641_c3_g2	TRINITY_DN37765_c0_g1	TRINITY_DN17651_c0_g2	TRINITY_DN20973_c0_g1	TRINITY_DN17230_c4_g1	TRINITY_DN19074_c4_g2	TRINITY_DN3951_c0_g1	TRINITY_DN22800_c8_g1
OG0001536	NA	NA	NA	NA	NA	NA	UP	NA	DW	7	1	1	1	2	OG0001536	TRINITY_DN1903_c0_g2	TRINITY_DN19076_c2_g2	TRINITY_DN43188_c1_g1	TRINITY_DN21807_c2_g2	TRINITY_DN17634_c0_g2	TRINITY_DN14039_c7_g1	TRINITY_DN7596_c0_g1	TRINITY_DN6031_c0_g1	TRINITY_DN20561_c6_g1
OG0001542	NA	NA	DW	NA	UP	NA	NA	NA	NA	7	1	1	1	2	OG0001542	TRINITY_DN1983_c3_g1	TRINITY_DN19104_c0_g2	TRINITY_DN64407_c0_g1	TRINITY_DN22528_c8_g1	TRINITY_DN21820_c0_g1	TRINITY_DN16232_c8_g1	TRINITY_DN15588_c0_g1	TRINITY_DN10_c1_g2	TRINITY_DN19951_c8_g2
OG0001548	NA	NA	UP	NA	NA	NA	NA	DW	NA	7	1	1	1	2	OG0001548	TRINITY_DN4284_c1_g3	TRINITY_DN18426_c1_g3	TRINITY_DN39319_c0_g1	TRINITY_DN21963_c7_g1	TRINITY_DN19821_c6_g2	TRINITY_DN15260_c3_g1		TRINITY_DN823_c3_g1	TRINITY_DN21292_c3_g1
OG0001578	NA	NA	DW	NA	NA	NA	NA	UP	NA	7	1	1	1	2	OG0001578	TRINITY_DN23662_c2_g1	TRINITY_DN19010_c4_g5	TRINITY_DN46153_c1_g1	TRINITY_DN22740_c3_g1	TRINITY_DN13068_c0_g2	TRINITY_DN14362_c12_g1	TRINITY_DN20500_c2_g5	TRINITY_DN1705_c2_g3	TRINITY_DN21651_c2_g2
OG0001673	NA	NA	UP	NA	DW	NA	NA	NA	NA	7	1	1	1	2	OG0001673	TRINITY_DN3668_c1_g1	TRINITY_DN17387_c11_g1	TRINITY_DN44230_c5_g1	TRINITY_DN20403_c0_g1	TRINITY_DN17937_c0_g1	TRINITY_DN16571_c4_g1	TRINITY_DN33674_c0_g1	TRINITY_DN4346_c1_g1	TRINITY_DN21333_c9_g2
OG0001727	NA	NA	NA	NA	UP	NA	NA	DW	NA	7	1	1	1	2	OG0001727	TRINITY_DN51369_c1_g1		TRINITY_DN89946_c0_g1	TRINITY_DN61296_c0_g1	TRINITY_DN21760_c8_g2	TRINITY_DN26534_c0_g1	TRINITY_DN46265_c0_g1		TRINITY_DN23395_c4_g5
OG0001753	NA	NA	DW	NA	NA	NA	NA	NA	UP	7	1	1	1	2	OG0001753	TRINITY_DN580_c16_g1	TRINITY_DN16953_c12_g1	TRINITY_DN42230_c6_g1	TRINITY_DN24938_c13_g1	TRINITY_DN21560_c6_g1	TRINITY_DN13997_c2_g1	TRINITY_DN21029_c3_g14	TRINITY_DN1317_c0_g3	TRINITY_DN19983_c6_g2
OG0001759	NA	NA	DW	NA	NA	NA	NA	NA	UP	7	1	1	1	2	OG0001759	TRINITY_DN606_c5_g1	TRINITY_DN11067_c0_g1	TRINITY_DN43920_c4_g1		TRINITY_DN20523_c4_g1	TRINITY_DN8244_c0_g1		TRINITY_DN11895_c0_g1	TRINITY_DN20642_c1_g1
OG0001817	NA	NA	NA	NA	UP	NA	NA	DW	NA	7	1	1	1	2	OG0001817	TRINITY_DN8459_c2_g4	TRINITY_DN18216_c5_g9	TRINITY_DN46836_c6_g3	TRINITY_DN24119_c6_g1	TRINITY_DN22151_c1_g4	TRINITY_DN19209_c6_g1	TRINITY_DN17986_c7_g1	TRINITY_DN3930_c0_g3	TRINITY_DN23632_c0_g1
OG0001832	NA	NA	UP	NA	NA	NA	NA	DW	NA	7	1	1	1	2	OG0001832	TRINITY_DN8918_c1_g1	TRINITY_DN11622_c0_g1	TRINITY_DN55405_c0_g1	TRINITY_DN20651_c0_g1	TRINITY_DN19284_c0_g1	TRINITY_DN11854_c0_g1	TRINITY_DN14929_c0_g3		TRINITY_DN19236_c2_g1
OG0001840	NA	NA	UP	NA	NA	NA	NA	DW	NA	7	1	1	1	2	OG0001840	TRINITY_DN911_c0_g2	TRINITY_DN18005_c7_g1	TRINITY_DN44552_c1_g1	TRINITY_DN22083_c0_g1	TRINITY_DN24252_c8_g1	TRINITY_DN19966_c2_g2	TRINITY_DN18812_c0_g1	TRINITY_DN1814_c0_g2	TRINITY_DN21514_c3_g1
OG0001843	NA	NA	NA	NA	UP	NA	NA	DW	NA	7	1	1	1	2	OG0001843	TRINITY_DN9346_c3_g1	TRINITY_DN13505_c0_g2	TRINITY_DN83116_c0_g1	TRINITY_DN3649_c0_g1	TRINITY_DN19668_c1_g1	TRINITY_DN20806_c4_g1	TRINITY_DN13173_c0_g1		TRINITY_DN6896_c0_g1
OG0001866	NA	NA	UP	NA	DW	NA	NA	NA	NA	7	1	1	1	2	OG0001866		TRINITY_DN14864_c0_g1	TRINITY_DN8384_c0_g1	TRINITY_DN22667_c7_g2	TRINITY_DN22741_c8_g1	TRINITY_DN20434_c3_g3	TRINITY_DN7505_c0_g1	TRINITY_DN8509_c0_g1	TRINITY_DN21339_c7_g1
OG0001886	NA	NA	DW	NA	NA	UP	NA	NA	NA	7	1	1	1	2	OG0001886		TRINITY_DN18721_c4_g1	TRINITY_DN41928_c8_g3	TRINITY_DN24174_c8_g1	TRINITY_DN22657_c5_g2	TRINITY_DN8276_c0_g1	TRINITY_DN13070_c0_g1	TRINITY_DN24983_c3_g1	TRINITY_DN5379_c0_g1
OG0001978	NA	NA	UP	NA	NA	NA	NA	DW	NA	7	1	1	1	2	OG0001978	TRINITY_DN12178_c1_g1	TRINITY_DN15241_c0_g1	TRINITY_DN41546_c7_g1	TRINITY_DN20757_c0_g1	TRINITY_DN23509_c3_g1	TRINITY_DN14003_c1_g1	TRINITY_DN16801_c0_g1		TRINITY_DN6851_c0_g1
OG0001986	NA	NA	UP	NA	NA	NA	NA	DW	NA	7	1	1	1	2	OG0001986	TRINITY_DN12571_c2_g1	TRINITY_DN16480_c8_g4	TRINITY_DN43164_c1_g2	TRINITY_DN22507_c4_g1	TRINITY_DN20580_c1_g3	TRINITY_DN16612_c0_g1	TRINITY_DN21097_c10_g4
OG0002011	NA	NA	UP	DW	NA	NA	NA	NA	NA	7	1	1	1	2	OG0002011	TRINITY_DN13193_c0_g1		TRINITY_DN43301_c2_g2	TRINITY_DN23082_c3_g1	TRINITY_DN23828_c0_g1	TRINITY_DN19137_c7_g1	TRINITY_DN18462_c1_g3	TRINITY_DN3324_c0_g1	TRINITY_DN22275_c1_g2
OG0002040	NA	NA	DW	NA	UP	NA	NA	NA	NA	7	1	1	1	2	OG0002040	TRINITY_DN14319_c0_g1	TRINITY_DN19799_c6_g2	TRINITY_DN33757_c0_g1	TRINITY_DN29122_c0_g1	TRINITY_DN23148_c6_g1	TRINITY_DN17792_c0_g1	TRINITY_DN15968_c0_g1	TRINITY_DN19563_c0_g2	TRINITY_DN21504_c2_g1
OG0002129	DW	NA	NA	NA	UP	NA	NA	NA	NA	7	1	1	1	2	OG0002129	TRINITY_DN19009_c6_g1	TRINITY_DN17355_c0_g1	TRINITY_DN48294_c5_g1	TRINITY_DN22739_c7_g2	TRINITY_DN18266_c10_g1		TRINITY_DN17824_c3_g1	TRINITY_DN5852_c5_g1	TRINITY_DN18696_c3_g2
OG0002226	NA	NA	DW	NA	NA	NA	NA	UP	NA	7	1	1	1	2	OG0002226	TRINITY_DN25060_c2_g1	TRINITY_DN15235_c0_g1	TRINITY_DN5958_c0_g1	TRINITY_DN1707_c0_g1	TRINITY_DN44146_c0_g1	TRINITY_DN10871_c0_g2	TRINITY_DN13174_c0_g1	TRINITY_DN8929_c0_g2	TRINITY_DN22183_c5_g1
OG0002243	NA	NA	NA	DW	NA	NA	NA	NA	UP	7	1	1	1	2	OG0002243	TRINITY_DN2625_c0_g2	TRINITY_DN19235_c1_g2	TRINITY_DN43810_c0_g1	TRINITY_DN24056_c2_g1	TRINITY_DN21159_c5_g2	TRINITY_DN19594_c5_g1	TRINITY_DN19656_c8_g3	TRINITY_DN1389_c2_g1	TRINITY_DN21793_c5_g2
OG0002262	NA	NA	DW	NA	NA	NA	NA	UP	NA	7	1	1	1	2	OG0002262	TRINITY_DN2727_c5_g1	TRINITY_DN19172_c2_g3	TRINITY_DN43263_c6_g4	TRINITY_DN22712_c4_g1	TRINITY_DN24398_c5_g2	TRINITY_DN13169_c5_g3	TRINITY_DN19749_c9_g2	TRINITY_DN6083_c1_g1	TRINITY_DN22126_c6_g1
OG0002343	NA	NA	NA	NA	UP	NA	NA	NA	DW	7	1	1	1	2	OG0002343	TRINITY_DN34280_c6_g1	TRINITY_DN17789_c3_g2	TRINITY_DN96581_c0_g1	TRINITY_DN8978_c0_g2	TRINITY_DN24489_c3_g1	TRINITY_DN18601_c3_g4	TRINITY_DN30122_c0_g1	TRINITY_DN3306_c1_g5	TRINITY_DN19539_c1_g1
OG0002369	NA	NA	UP	NA	NA	NA	NA	NA	DW	7	1	1	1	2	OG0002369	TRINITY_DN366_c0_g2	TRINITY_DN15497_c0_g1	TRINITY_DN39100_c0_g1	TRINITY_DN20930_c0_g1	TRINITY_DN19573_c4_g1	TRINITY_DN20059_c8_g1	TRINITY_DN16377_c0_g1	TRINITY_DN275_c0_g4	TRINITY_DN21440_c0_g1
OG0002406	DW	NA	UP	NA	NA	NA	NA	NA	NA	7	1	1	1	2	OG0002406	TRINITY_DN4038_c0_g1	TRINITY_DN16604_c11_g3	TRINITY_DN48078_c3_g1	TRINITY_DN21686_c3_g2		TRINITY_DN15274_c8_g7	TRINITY_DN17661_c3_g4	TRINITY_DN8257_c0_g1	TRINITY_DN22949_c6_g1
OG0002475	NA	NA	DW	NA	UP	NA	NA	NA	NA	7	1	1	1	2	OG0002475	TRINITY_DN5121_c0_g1	TRINITY_DN17825_c2_g1	TRINITY_DN65087_c0_g1	TRINITY_DN26085_c0_g1	TRINITY_DN18379_c8_g1	TRINITY_DN16161_c3_g2	TRINITY_DN4719_c0_g1	TRINITY_DN10939_c0_g2	TRINITY_DN22698_c5_g6
OG0002577	NA	NA	UP	DW	NA	NA	NA	NA	NA	7	1	1	1	2	OG0002577	TRINITY_DN7308_c0_g2	TRINITY_DN14636_c0_g1	TRINITY_DN39937_c0_g2	TRINITY_DN24562_c5_g1	TRINITY_DN23878_c6_g2	TRINITY_DN18283_c4_g4	TRINITY_DN17448_c0_g1	TRINITY_DN4594_c0_g1	TRINITY_DN22898_c1_g1
OG0002585	NA	NA	NA	NA	UP	NA	NA	NA	DW	7	1	1	1	2	OG0002585	TRINITY_DN7486_c0_g1	TRINITY_DN17291_c12_g4	TRINITY_DN41746_c0_g1	TRINITY_DN20620_c0_g2	TRINITY_DN21869_c2_g1	TRINITY_DN19653_c6_g1	TRINITY_DN20747_c5_g1	TRINITY_DN3697_c0_g1	TRINITY_DN20119_c4_g1
OG0002605	NA	NA	DW	NA	UP	NA	NA	NA	NA	7	1	1	1	2	OG0002605	TRINITY_DN796_c0_g1		TRINITY_DN40671_c0_g1	TRINITY_DN22942_c6_g1	TRINITY_DN18750_c9_g1	TRINITY_DN17165_c3_g1		TRINITY_DN4171_c1_g1	TRINITY_DN18163_c12_g5
OG0002608	NA	NA	UP	NA	DW	NA	NA	NA	NA	7	1	1	1	2	OG0002608	TRINITY_DN800_c2_g1	TRINITY_DN17163_c5_g1	TRINITY_DN44564_c11_g2		TRINITY_DN21474_c1_g1		TRINITY_DN18047_c2_g1	TRINITY_DN2513_c2_g3	TRINITY_DN23819_c2_g1
OG0002677	NA	UP	DW	NA	NA	NA	NA	NA	NA	7	1	1	1	2	OG0002677		TRINITY_DN14862_c0_g1	TRINITY_DN81427_c0_g1	TRINITY_DN44309_c0_g1	TRINITY_DN21612_c1_g1	TRINITY_DN27574_c0_g1	TRINITY_DN16175_c0_g1	TRINITY_DN4190_c6_g2	TRINITY_DN12802_c0_g1
OG0002686	NA	DW	UP	NA	NA	NA	NA	NA	NA	7	1	1	1	2	OG0002686		TRINITY_DN16352_c9_g2	TRINITY_DN44211_c4_g1	TRINITY_DN24026_c2_g2	TRINITY_DN23599_c2_g1	TRINITY_DN21095_c1_g1	TRINITY_DN16325_c0_g1	TRINITY_DN13808_c0_g4	TRINITY_DN21262_c1_g1
OG0002707	NA	NA	DW	NA	UP	NA	NA	NA	NA	7	1	1	1	2	OG0002707		TRINITY_DN18135_c6_g1	TRINITY_DN49063_c0_g1		TRINITY_DN19303_c7_g1	TRINITY_DN20779_c11_g1	TRINITY_DN21228_c1_g2	TRINITY_DN177_c0_g3	TRINITY_DN20302_c13_g1
OG0002755	NA	NA	UP	NA	NA	NA	NA	DW	NA	7	1	1	1	2	OG0002755	TRINITY_DN0_c11_g1	TRINITY_DN19273_c9_g7	TRINITY_DN46694_c1_g12	TRINITY_DN25576_c0_g1	TRINITY_DN8337_c0_g2	TRINITY_DN23438_c0_g1	TRINITY_DN17988_c6_g1
OG0002759	DW	NA	NA	NA	NA	NA	NA	UP	NA	7	1	1	1	2	OG0002759	TRINITY_DN1002_c5_g2	TRINITY_DN19356_c10_g1	TRINITY_DN46372_c0_g1	TRINITY_DN22234_c5_g1	TRINITY_DN22417_c6_g1	TRINITY_DN16526_c4_g1	TRINITY_DN19270_c7_g1	TRINITY_DN232_c3_g2	TRINITY_DN23879_c6_g3
OG0002819	NA	NA	UP	DW	NA	NA	NA	NA	NA	7	1	1	1	2	OG0002819	TRINITY_DN10529_c1_g2	TRINITY_DN17059_c0_g2	TRINITY_DN42333_c1_g1	TRINITY_DN21073_c0_g1	TRINITY_DN20628_c11_g4	TRINITY_DN20687_c4_g2	TRINITY_DN18470_c8_g2	TRINITY_DN34918_c0_g1	TRINITY_DN22451_c4_g2
OG0002893	DW	NA	NA	NA	NA	NA	NA	UP	NA	7	1	1	1	2	OG0002893	TRINITY_DN1120_c3_g2	TRINITY_DN18044_c4_g1	TRINITY_DN48998_c1_g1	TRINITY_DN22703_c2_g1	TRINITY_DN23935_c2_g1	TRINITY_DN18982_c8_g2	TRINITY_DN19274_c8_g2	TRINITY_DN251_c5_g1	TRINITY_DN22127_c0_g1
OG0002972	NA	NA	DW	NA	NA	NA	NA	UP	NA	7	1	1	1	2	OG0002972	TRINITY_DN12142_c1_g2	TRINITY_DN18817_c6_g1	TRINITY_DN47913_c0_g1	TRINITY_DN22204_c11_g1	TRINITY_DN21896_c11_g1	TRINITY_DN17569_c5_g1	TRINITY_DN19715_c6_g1	TRINITY_DN350_c2_g4	TRINITY_DN20760_c3_g1
OG0003007	NA	NA	UP	NA	NA	NA	NA	DW	NA	7	1	1	1	2	OG0003007	TRINITY_DN12450_c7_g1	TRINITY_DN35034_c0_g1	TRINITY_DN3708_c0_g1	TRINITY_DN22803_c2_g4	TRINITY_DN50055_c0_g1	TRINITY_DN17066_c0_g2			TRINITY_DN22148_c5_g1
OG0003043	NA	NA	DW	NA	NA	NA	NA	UP	NA	7	1	1	1	2	OG0003043	TRINITY_DN1276_c9_g1	TRINITY_DN16720_c11_g1	TRINITY_DN46582_c1_g1	TRINITY_DN23564_c8_g1	TRINITY_DN18901_c9_g1	TRINITY_DN20063_c7_g1	TRINITY_DN18787_c3_g3	TRINITY_DN2994_c4_g2	TRINITY_DN21957_c2_g2
OG0003146	NA	NA	DW	NA	UP	NA	NA	NA	NA	7	1	1	1	2	OG0003146	TRINITY_DN1398_c8_g1	TRINITY_DN17346_c2_g1	TRINITY_DN43326_c2_g6	TRINITY_DN19280_c0_g2	TRINITY_DN18529_c4_g1	TRINITY_DN18994_c3_g3	TRINITY_DN18043_c4_g2	TRINITY_DN435_c7_g1	TRINITY_DN18094_c6_g1
OG0003179	NA	NA	UP	NA	NA	NA	NA	DW	NA	7	1	1	1	2	OG0003179	TRINITY_DN14315_c2_g1	TRINITY_DN16402_c3_g17	TRINITY_DN19954_c0_g1	TRINITY_DN31870_c0_g1	TRINITY_DN28396_c0_g1	TRINITY_DN18974_c2_g1	TRINITY_DN20044_c6_g7
OG0003214	UP	NA	DW	NA	NA	NA	NA	NA	NA	7	1	1	1	2	OG0003214	TRINITY_DN145_c33_g1	TRINITY_DN17839_c7_g1	TRINITY_DN43428_c7_g3		TRINITY_DN21905_c7_g1	TRINITY_DN13635_c8_g3	TRINITY_DN19086_c4_g6	TRINITY_DN1769_c2_g1	TRINITY_DN19691_c4_g1
OG0003302	NA	NA	NA	NA	UP	NA	NA	DW	NA	7	1	1	1	2	OG0003302	TRINITY_DN1586_c0_g1	TRINITY_DN18965_c1_g1	TRINITY_DN45715_c0_g1	TRINITY_DN20703_c0_g1	TRINITY_DN19650_c8_g1	TRINITY_DN13577_c2_g1	TRINITY_DN20735_c1_g1		TRINITY_DN20928_c0_g1
OG0003399	NA	NA	UP	NA	NA	NA	NA	NA	DW	7	1	1	1	2	OG0003399	TRINITY_DN17048_c0_g1	TRINITY_DN18428_c4_g1	TRINITY_DN43043_c7_g2		TRINITY_DN19103_c0_g2	TRINITY_DN17060_c2_g1	TRINITY_DN18178_c7_g1	TRINITY_DN1758_c0_g2	TRINITY_DN23155_c5_g2
OG0003433	UP	NA	DW	NA	NA	NA	NA	NA	NA	7	1	1	1	2	OG0003433	TRINITY_DN17665_c0_g2	TRINITY_DN13536_c0_g1	TRINITY_DN44807_c0_g1	TRINITY_DN20399_c0_g1	TRINITY_DN17523_c0_g1	TRINITY_DN14907_c0_g1	TRINITY_DN21460_c0_g1	TRINITY_DN3595_c6_g1	TRINITY_DN21571_c0_g1
OG0003475	DW	NA	NA	NA	NA	NA	NA	UP	NA	7	1	1	1	2	OG0003475	TRINITY_DN1815_c0_g10	TRINITY_DN19643_c12_g1	TRINITY_DN47896_c1_g1	TRINITY_DN21729_c6_g1	TRINITY_DN19915_c9_g1	TRINITY_DN18004_c4_g1	TRINITY_DN18290_c6_g1	TRINITY_DN4486_c1_g1	TRINITY_DN19203_c10_g1
OG0003587	NA	DW	UP	NA	NA	NA	NA	NA	NA	7	1	1	1	2	OG0003587	TRINITY_DN1981_c0_g2	TRINITY_DN16005_c0_g2	TRINITY_DN42763_c0_g1	TRINITY_DN22400_c5_g1	TRINITY_DN23845_c11_g1	TRINITY_DN16096_c1_g1	TRINITY_DN16044_c0_g1	TRINITY_DN5599_c0_g1	TRINITY_DN18821_c3_g4
OG0003602	NA	NA	UP	NA	NA	NA	NA	NA	DW	7	1	1	1	2	OG0003602	TRINITY_DN1997_c0_g2	TRINITY_DN16683_c8_g2	TRINITY_DN35568_c0_g1	TRINITY_DN20820_c0_g1	TRINITY_DN17841_c1_g1	TRINITY_DN15344_c2_g1	TRINITY_DN19410_c5_g2	TRINITY_DN1138_c3_g3	TRINITY_DN22636_c14_g1
OG0003636	NA	NA	UP	NA	NA	NA	NA	NA	DW	7	1	1	1	2	OG0003636	TRINITY_DN20609_c0_g1	TRINITY_DN25203_c0_g1	TRINITY_DN35417_c0_g1	TRINITY_DN23489_c0_g4	TRINITY_DN24043_c6_g1	TRINITY_DN18976_c8_g2	TRINITY_DN14235_c0_g2	TRINITY_DN3791_c0_g4	TRINITY_DN21926_c3_g1
OG0003696	NA	NA	UP	DW	NA	NA	NA	NA	NA	7	1	1	1	2	OG0003696	TRINITY_DN2175_c11_g1	TRINITY_DN9788_c0_g2	TRINITY_DN79821_c0_g1	TRINITY_DN16996_c0_g1		TRINITY_DN15484_c7_g2		TRINITY_DN8691_c3_g1	TRINITY_DN21437_c3_g2
OG0003720	NA	NA	UP	NA	NA	NA	NA	DW	NA	7	1	1	1	2	OG0003720	TRINITY_DN2204_c0_g1	TRINITY_DN18684_c3_g1	TRINITY_DN44577_c0_g1	TRINITY_DN21382_c0_g1	TRINITY_DN18268_c0_g1	TRINITY_DN16873_c1_g2	TRINITY_DN20668_c5_g3		TRINITY_DN23921_c9_g1
OG0003797	NA	NA	UP	NA	NA	NA	NA	NA	DW	7	1	1	1	2	OG0003797	TRINITY_DN2343_c0_g1	TRINITY_DN15943_c0_g2	TRINITY_DN47648_c2_g1	TRINITY_DN24627_c3_g3	TRINITY_DN20278_c8_g3	TRINITY_DN16968_c5_g1	TRINITY_DN18394_c12_g1	TRINITY_DN46_c1_g3	TRINITY_DN18869_c10_g1
OG0003827	NA	NA	NA	NA	UP	NA	NA	DW	NA	7	1	1	1	2	OG0003827	TRINITY_DN23828_c4_g1	TRINITY_DN19784_c1_g5	TRINITY_DN44451_c4_g1	TRINITY_DN24856_c5_g9	TRINITY_DN18485_c7_g3	TRINITY_DN21046_c3_g2	TRINITY_DN20373_c1_g2		TRINITY_DN48599_c0_g1
OG0003862	NA	NA	UP	NA	NA	NA	NA	NA	DW	7	1	1	1	2	OG0003862	TRINITY_DN2444_c0_g1	TRINITY_DN18046_c0_g4	TRINITY_DN46946_c5_g1	TRINITY_DN24211_c4_g1			TRINITY_DN18396_c4_g8	TRINITY_DN584_c0_g2	TRINITY_DN21825_c11_g1
OG0003885	NA	NA	UP	DW	NA	NA	NA	NA	NA	7	1	1	1	2	OG0003885	TRINITY_DN24956_c2_g1		TRINITY_DN42712_c7_g2	TRINITY_DN21940_c2_g1	TRINITY_DN51437_c0_g1	TRINITY_DN25475_c0_g1		TRINITY_DN42836_c0_g1	TRINITY_DN23932_c8_g2
OG0003915	NA	NA	DW	NA	NA	NA	NA	NA	UP	7	1	1	1	2	OG0003915	TRINITY_DN2554_c0_g2	TRINITY_DN17782_c3_g8	TRINITY_DN46571_c2_g1	TRINITY_DN24205_c8_g2	TRINITY_DN24520_c6_g1	TRINITY_DN12550_c9_g1	TRINITY_DN18400_c6_g2	TRINITY_DN4260_c2_g1	TRINITY_DN18793_c3_g4
OG0003967	NA	NA	DW	NA	NA	NA	NA	NA	UP	7	1	1	1	2	OG0003967	TRINITY_DN267_c1_g4	TRINITY_DN19301_c2_g1	TRINITY_DN45000_c9_g1	TRINITY_DN22068_c9_g5	TRINITY_DN23804_c2_g5	TRINITY_DN13775_c8_g2	TRINITY_DN17991_c9_g3	TRINITY_DN2241_c2_g3	TRINITY_DN20497_c11_g2
OG0003972	UP	NA	NA	NA	NA	NA	NA	DW	NA	7	1	1	1	2	OG0003972	TRINITY_DN2688_c2_g3	TRINITY_DN19023_c11_g3	TRINITY_DN45794_c6_g2	TRINITY_DN22113_c10_g10	TRINITY_DN23250_c5_g2	TRINITY_DN16752_c5_g6	TRINITY_DN18882_c9_g1
OG0004044	NA	NA	DW	NA	UP	NA	NA	NA	NA	7	1	1	1	2	OG0004044	TRINITY_DN2837_c2_g5	TRINITY_DN17883_c9_g3	TRINITY_DN45417_c4_g1	TRINITY_DN24208_c5_g1	TRINITY_DN19205_c0_g1	TRINITY_DN13470_c3_g1	TRINITY_DN18373_c1_g1	TRINITY_DN1528_c0_g2	TRINITY_DN23106_c5_g2
OG0004091	NA	NA	UP	NA	NA	NA	NA	DW	NA	7	1	1	1	2	OG0004091	TRINITY_DN292_c0_g2	TRINITY_DN18596_c1_g1	TRINITY_DN43444_c9_g2	TRINITY_DN24607_c4_g2	TRINITY_DN24965_c5_g1	TRINITY_DN18608_c0_g1	TRINITY_DN18970_c1_g1		TRINITY_DN22439_c1_g1
OG0004133	NA	NA	DW	NA	NA	NA	NA	UP	NA	7	1	1	1	2	OG0004133	TRINITY_DN3022_c0_g1	TRINITY_DN18378_c2_g1	TRINITY_DN41613_c0_g1	TRINITY_DN20159_c0_g1	TRINITY_DN22355_c3_g2	TRINITY_DN15271_c4_g1	TRINITY_DN17409_c0_g2	TRINITY_DN2415_c0_g1	TRINITY_DN19378_c0_g1
OG0004241	NA	NA	DW	NA	NA	NA	NA	NA	UP	7	1	1	1	2	OG0004241	TRINITY_DN3287_c2_g2	TRINITY_DN16747_c4_g1	TRINITY_DN47737_c6_g1	TRINITY_DN21845_c9_g2	TRINITY_DN23198_c3_g1	TRINITY_DN13349_c7_g1	TRINITY_DN19141_c8_g3	TRINITY_DN825_c0_g2	TRINITY_DN21204_c1_g1
OG0004365	NA	NA	UP	NA	NA	NA	NA	DW	NA	7	1	1	1	2	OG0004365	TRINITY_DN36258_c1_g1	TRINITY_DN4339_c0_g1	TRINITY_DN42673_c10_g1	TRINITY_DN22741_c3_g1	TRINITY_DN19857_c0_g1	TRINITY_DN32393_c0_g1			TRINITY_DN36394_c0_g1
OG0004478	NA	NA	UP	NA	NA	NA	NA	NA	DW	7	1	1	1	2	OG0004478	TRINITY_DN3930_c0_g1	TRINITY_DN17413_c9_g1	TRINITY_DN45531_c3_g2	TRINITY_DN23513_c7_g2		TRINITY_DN14187_c11_g1		TRINITY_DN24935_c0_g2	TRINITY_DN21674_c5_g2
OG0004589	NA	NA	NA	NA	UP	NA	NA	NA	DW	7	1	1	1	2	OG0004589	TRINITY_DN42810_c1_g1	TRINITY_DN2083_c0_g1	TRINITY_DN38768_c0_g1	TRINITY_DN19834_c0_g1	TRINITY_DN23493_c9_g2	TRINITY_DN17531_c3_g1	TRINITY_DN12694_c0_g1	TRINITY_DN3618_c1_g7	TRINITY_DN21602_c2_g5
OG0004626	NA	NA	NA	NA	UP	NA	NA	DW	NA	7	1	1	1	2	OG0004626	TRINITY_DN43796_c0_g1	TRINITY_DN38660_c0_g1	TRINITY_DN89724_c0_g1	TRINITY_DN26132_c0_g1	TRINITY_DN22619_c1_g1	TRINITY_DN15158_c0_g1	TRINITY_DN16412_c0_g1	TRINITY_DN5303_c0_g3	TRINITY_DN17927_c0_g1
OG0004839	NA	NA	UP	DW	NA	NA	NA	NA	NA	7	1	1	1	2	OG0004839	TRINITY_DN507_c0_g1	TRINITY_DN16723_c2_g2	TRINITY_DN40931_c0_g1	TRINITY_DN19720_c0_g1	TRINITY_DN23092_c4_g1	TRINITY_DN19121_c4_g1	TRINITY_DN15296_c0_g1	TRINITY_DN1649_c1_g1	TRINITY_DN20934_c0_g3
OG0004867	NA	NA	DW	NA	UP	NA	NA	NA	NA	7	1	1	1	2	OG0004867	TRINITY_DN52002_c1_g1	TRINITY_DN15260_c0_g1	TRINITY_DN23769_c0_g1	TRINITY_DN23250_c6_g2	TRINITY_DN18105_c7_g1	TRINITY_DN17314_c5_g1	TRINITY_DN19879_c0_g1	TRINITY_DN3996_c0_g2	TRINITY_DN21534_c4_g1
OG0004896	NA	NA	NA	NA	UP	NA	NA	NA	DW	7	1	1	1	2	OG0004896	TRINITY_DN53042_c1_g1	TRINITY_DN17729_c3_g1		TRINITY_DN23272_c3_g1	TRINITY_DN21313_c3_g1	TRINITY_DN15289_c2_g3	TRINITY_DN20304_c11_g1	TRINITY_DN1135_c4_g1	TRINITY_DN19108_c6_g1
OG0004925	NA	NA	DW	NA	NA	NA	NA	UP	NA	7	1	1	1	2	OG0004925	TRINITY_DN5436_c4_g1	TRINITY_DN18044_c5_g2	TRINITY_DN40927_c0_g1	TRINITY_DN23065_c2_g2	TRINITY_DN21379_c2_g4	TRINITY_DN12772_c1_g4	TRINITY_DN21218_c5_g5	TRINITY_DN2825_c2_g2	TRINITY_DN22385_c5_g1
OG0005030	NA	NA	UP	DW	NA	NA	NA	NA	NA	7	1	1	1	2	OG0005030	TRINITY_DN5938_c0_g1	TRINITY_DN17560_c5_g1	TRINITY_DN43283_c7_g2	TRINITY_DN22678_c5_g9	TRINITY_DN21723_c5_g3	TRINITY_DN13675_c3_g1	TRINITY_DN17425_c0_g1	TRINITY_DN1943_c1_g2	TRINITY_DN20884_c7_g1
OG0005042	UP	NA	DW	NA	NA	NA	NA	NA	NA	7	1	1	1	2	OG0005042	TRINITY_DN5_c6_g2	TRINITY_DN16826_c6_g1	TRINITY_DN47488_c3_g1	TRINITY_DN23122_c3_g2	TRINITY_DN24085_c5_g2	TRINITY_DN12278_c2_g3	TRINITY_DN19552_c7_g1	TRINITY_DN1244_c0_g1	TRINITY_DN22105_c5_g1
OG0005137	NA	DW	UP	NA	NA	NA	NA	NA	NA	7	1	1	1	2	OG0005137	TRINITY_DN64_c2_g1	TRINITY_DN19073_c5_g1	TRINITY_DN42132_c2_g1	TRINITY_DN24152_c2_g1	TRINITY_DN19228_c6_g1	TRINITY_DN18339_c3_g2	TRINITY_DN12376_c0_g1	TRINITY_DN5318_c0_g1	TRINITY_DN19197_c5_g5
OG0005284	NA	NA	UP	DW	NA	NA	NA	NA	NA	7	1	1	1	2	OG0005284	TRINITY_DN7371_c1_g1	TRINITY_DN12560_c0_g1	TRINITY_DN40960_c0_g1	TRINITY_DN19988_c0_g1	TRINITY_DN18422_c3_g1	TRINITY_DN20657_c6_g4	TRINITY_DN32669_c0_g1	TRINITY_DN886_c2_g1	TRINITY_DN23780_c5_g2
OG0005312	NA	NA	DW	NA	UP	NA	NA	NA	NA	7	1	1	1	2	OG0005312	TRINITY_DN74_c13_g1	TRINITY_DN18365_c0_g5	TRINITY_DN45688_c1_g1	TRINITY_DN23954_c6_g1	TRINITY_DN23067_c3_g2	TRINITY_DN20786_c10_g1	TRINITY_DN20969_c6_g4	TRINITY_DN8674_c0_g1	TRINITY_DN22605_c8_g1
OG0005332	NA	NA	DW	NA	UP	NA	NA	NA	NA	7	1	1	1	2	OG0005332	TRINITY_DN765_c0_g2	TRINITY_DN19451_c10_g3	TRINITY_DN45661_c7_g1	TRINITY_DN23276_c10_g1	TRINITY_DN22371_c2_g1	TRINITY_DN15560_c7_g3	TRINITY_DN18804_c1_g2	TRINITY_DN257_c2_g10	TRINITY_DN22153_c9_g5
OG0005371	NA	NA	UP	NA	NA	NA	NA	DW	NA	7	1	1	1	2	OG0005371	TRINITY_DN7918_c0_g1	TRINITY_DN17169_c9_g1	TRINITY_DN44894_c6_g5	TRINITY_DN22809_c9_g6	TRINITY_DN23460_c8_g1	TRINITY_DN21358_c9_g1	TRINITY_DN19600_c9_g1		TRINITY_DN20591_c6_g1
OG0005384	DW	NA	NA	NA	NA	NA	NA	UP	NA	7	1	1	1	2	OG0005384	TRINITY_DN79_c0_g2	TRINITY_DN16753_c4_g1	TRINITY_DN41937_c0_g1	TRINITY_DN21236_c1_g1	TRINITY_DN23540_c2_g1	TRINITY_DN14485_c6_g1	TRINITY_DN16770_c0_g1	TRINITY_DN7429_c0_g2	TRINITY_DN23409_c4_g1
OG0005403	NA	DW	UP	NA	NA	NA	NA	NA	NA	7	1	1	1	2	OG0005403	TRINITY_DN80_c2_g1	TRINITY_DN17813_c2_g2	TRINITY_DN44822_c5_g1	TRINITY_DN23667_c11_g1	TRINITY_DN24169_c2_g3	TRINITY_DN18469_c4_g8	TRINITY_DN11883_c0_g1	TRINITY_DN9592_c0_g2	TRINITY_DN18099_c10_g1
OG0005411	NA	NA	UP	NA	NA	NA	NA	DW	NA	7	1	1	1	2	OG0005411	TRINITY_DN817_c15_g1		TRINITY_DN44549_c6_g2	TRINITY_DN24123_c4_g1	TRINITY_DN21171_c1_g2	TRINITY_DN20370_c5_g12	TRINITY_DN20032_c4_g2		TRINITY_DN18414_c3_g5
OG0005478	UP	NA	DW	NA	NA	NA	NA	NA	NA	7	1	1	1	2	OG0005478	TRINITY_DN8601_c7_g1	TRINITY_DN19154_c3_g2	TRINITY_DN48182_c4_g1	TRINITY_DN24911_c11_g1	TRINITY_DN3590_c0_g1	TRINITY_DN13895_c2_g1	TRINITY_DN43441_c0_g1	TRINITY_DN2265_c1_g2	TRINITY_DN22110_c2_g1
OG0005509	UP	NA	DW	NA	NA	NA	NA	NA	NA	7	1	1	1	2	OG0005509	TRINITY_DN8835_c0_g1	TRINITY_DN17832_c4_g1	TRINITY_DN48245_c3_g1	TRINITY_DN21668_c12_g1	TRINITY_DN20664_c4_g2	TRINITY_DN16597_c2_g1	TRINITY_DN17639_c10_g1	TRINITY_DN6681_c0_g1	TRINITY_DN23711_c8_g3
OG0005686	NA	NA	DW	NA	UP	NA	NA	NA	NA	7	1	1	1	2	OG0005686		TRINITY_DN16427_c3_g2	TRINITY_DN61995_c0_g1	TRINITY_DN1466_c0_g1	TRINITY_DN24478_c2_g7	TRINITY_DN17568_c5_g4	TRINITY_DN20326_c2_g6	TRINITY_DN13647_c0_g1
OG0005746	NA	NA	UP	NA	NA	NA	NA	DW	NA	7	1	1	1	2	OG0005746		TRINITY_DN5757_c0_g1	TRINITY_DN80636_c0_g1	TRINITY_DN24021_c0_g7	TRINITY_DN34274_c0_g1	TRINITY_DN21247_c4_g1	TRINITY_DN31294_c0_g1		TRINITY_DN23395_c4_g2
OG0005758	NA	NA	NA	NA	UP	NA	NA	NA	DW	7	1	1	1	2	OG0005758		TRINITY_DN45644_c0_g1	TRINITY_DN2883_c0_g1	TRINITY_DN22227_c9_g7	TRINITY_DN23684_c11_g2	TRINITY_DN22617_c0_g1	TRINITY_DN30387_c0_g1	TRINITY_DN31035_c1_g1	TRINITY_DN21211_c4_g3
OG0005806	UP	NA	NA	NA	NA	NA	NA	DW	NA	7	1	1	1	2	OG0005806	TRINITY_DN104_c3_g2	TRINITY_DN18686_c4_g3	TRINITY_DN46082_c2_g1	TRINITY_DN24116_c4_g2	TRINITY_DN25151_c10_g1	TRINITY_DN13269_c2_g1	TRINITY_DN18587_c9_g1		TRINITY_DN19958_c5_g5
OG0005836	NA	NA	NA	NA	NA	NA	NA	DW	UP	7	1	1	1	2	OG0005836	TRINITY_DN11170_c0_g1	TRINITY_DN19165_c9_g1	TRINITY_DN40289_c0_g1	TRINITY_DN24878_c5_g12	TRINITY_DN13934_c0_g1	TRINITY_DN19486_c3_g1	TRINITY_DN17236_c0_g1		TRINITY_DN22844_c0_g2
OG0005846	NA	NA	UP	NA	NA	NA	NA	DW	NA	7	1	1	1	2	OG0005846	TRINITY_DN11277_c0_g1	TRINITY_DN18275_c7_g2	TRINITY_DN44322_c2_g1	TRINITY_DN20991_c0_g1	TRINITY_DN18455_c6_g1	TRINITY_DN15682_c2_g1	TRINITY_DN15127_c0_g1		TRINITY_DN22668_c5_g1
OG0005870	NA	NA	UP	NA	NA	NA	NA	DW	NA	7	1	1	1	2	OG0005870	TRINITY_DN11784_c5_g1	TRINITY_DN40560_c0_g1	TRINITY_DN41345_c6_g1	TRINITY_DN23424_c5_g2	TRINITY_DN23160_c9_g3	TRINITY_DN14065_c2_g1	TRINITY_DN18940_c0_g1		TRINITY_DN18507_c3_g4
OG0005877	NA	NA	UP	NA	NA	NA	NA	DW	NA	7	1	1	1	2	OG0005877	TRINITY_DN1191_c0_g2	TRINITY_DN16842_c7_g1	TRINITY_DN43792_c0_g2	TRINITY_DN21585_c0_g1	TRINITY_DN19081_c6_g1	TRINITY_DN14864_c4_g3	TRINITY_DN17686_c11_g1		TRINITY_DN22560_c5_g2
OG0005906	NA	NA	NA	NA	DW	NA	NA	NA	UP	7	1	1	1	2	OG0005906	TRINITY_DN1236_c0_g1		TRINITY_DN44945_c8_g1		TRINITY_DN22464_c4_g1	TRINITY_DN15138_c8_g1	TRINITY_DN18451_c3_g9	TRINITY_DN2089_c0_g6	TRINITY_DN19979_c4_g1
OG0005927	NA	NA	NA	NA	NA	NA	NA	DW	UP	7	1	1	1	2	OG0005927	TRINITY_DN1268_c1_g2	TRINITY_DN18922_c5_g1	TRINITY_DN44766_c6_g1	TRINITY_DN24709_c6_g1	TRINITY_DN24581_c9_g1	TRINITY_DN20228_c9_g1	TRINITY_DN19989_c7_g1		TRINITY_DN19033_c2_g1
OG0005952	NA	NA	UP	NA	NA	NA	NA	DW	NA	7	1	1	1	2	OG0005952	TRINITY_DN13283_c2_g1	TRINITY_DN16859_c10_g3	TRINITY_DN26451_c0_g1	TRINITY_DN24209_c0_g1	TRINITY_DN23433_c11_g2		TRINITY_DN19298_c4_g3		TRINITY_DN22048_c2_g1
OG0005967	NA	NA	NA	NA	NA	NA	NA	DW	UP	7	1	1	1	2	OG0005967	TRINITY_DN13532_c8_g1	TRINITY_DN18924_c1_g1	TRINITY_DN15902_c0_g1	TRINITY_DN52932_c0_g1	TRINITY_DN22041_c1_g3	TRINITY_DN14405_c7_g3	TRINITY_DN19144_c7_g2		TRINITY_DN22672_c5_g1
OG0005993	NA	NA	UP	NA	NA	NA	NA	DW	NA	7	1	1	1	2	OG0005993	TRINITY_DN14120_c0_g2	TRINITY_DN24477_c0_g1	TRINITY_DN62880_c0_g1	TRINITY_DN14155_c0_g1	TRINITY_DN11650_c0_g1	TRINITY_DN19152_c5_g1	TRINITY_DN14760_c0_g1
OG0006112	NA	DW	UP	NA	NA	NA	NA	NA	NA	7	1	1	1	2	OG0006112	TRINITY_DN17357_c0_g2	TRINITY_DN18516_c7_g7	TRINITY_DN33218_c1_g1	TRINITY_DN23364_c3_g1	TRINITY_DN20681_c2_g1	TRINITY_DN35201_c0_g1		TRINITY_DN9611_c1_g1
OG0006144	NA	NA	UP	NA	DW	NA	NA	NA	NA	7	1	1	1	2	OG0006144	TRINITY_DN18574_c0_g2	TRINITY_DN11249_c0_g1	TRINITY_DN25684_c0_g1	TRINITY_DN20848_c0_g1	TRINITY_DN19470_c7_g2	TRINITY_DN16444_c4_g3	TRINITY_DN13987_c0_g1	TRINITY_DN369_c0_g2
OG0006244	UP	NA	NA	NA	NA	NA	NA	DW	NA	7	1	1	1	2	OG0006244	TRINITY_DN2186_c0_g2	TRINITY_DN18376_c8_g1	TRINITY_DN43304_c0_g1	TRINITY_DN24477_c4_g1	TRINITY_DN20247_c6_g1	TRINITY_DN18316_c6_g1	TRINITY_DN19587_c2_g2		TRINITY_DN20868_c8_g1
OG0006390	UP	DW	NA	NA	NA	NA	NA	NA	NA	7	1	1	1	2	OG0006390	TRINITY_DN2819_c8_g1	TRINITY_DN20549_c0_g1	TRINITY_DN69522_c0_g1	TRINITY_DN4600_c0_g1	TRINITY_DN24329_c6_g2	TRINITY_DN16345_c2_g1	TRINITY_DN21194_c7_g1	TRINITY_DN22160_c0_g1
OG0006471	NA	NA	UP	NA	NA	NA	NA	DW	NA	7	1	1	1	2	OG0006471	TRINITY_DN32056_c1_g1	TRINITY_DN16673_c8_g1	TRINITY_DN24449_c0_g1	TRINITY_DN22236_c9_g3	TRINITY_DN21349_c4_g1	TRINITY_DN11046_c0_g1	TRINITY_DN13175_c0_g1
OG0006548	NA	NA	UP	NA	NA	NA	NA	DW	NA	7	1	1	1	2	OG0006548	TRINITY_DN36730_c2_g1		TRINITY_DN52577_c0_g1	TRINITY_DN22296_c7_g2	TRINITY_DN33991_c0_g1	TRINITY_DN15559_c3_g1	TRINITY_DN20939_c1_g1		TRINITY_DN22154_c9_g1
OG0006622	NA	NA	NA	DW	NA	NA	NA	NA	UP	7	1	1	1	2	OG0006622	TRINITY_DN42758_c1_g1	TRINITY_DN16873_c6_g3	TRINITY_DN42456_c0_g1	TRINITY_DN20081_c0_g1		TRINITY_DN14572_c8_g4	TRINITY_DN15864_c0_g1	TRINITY_DN11504_c0_g2	TRINITY_DN20941_c8_g2
OG0006628	UP	NA	NA	NA	NA	NA	NA	DW	NA	7	1	1	1	2	OG0006628	TRINITY_DN429_c1_g1	TRINITY_DN19647_c1_g1	TRINITY_DN45270_c3_g2		TRINITY_DN24270_c8_g1	TRINITY_DN12257_c5_g3	TRINITY_DN21232_c6_g1		TRINITY_DN21467_c8_g1
OG0006671	NA	NA	UP	NA	NA	NA	NA	NA	DW	7	1	1	1	2	OG0006671	TRINITY_DN4586_c0_g1	TRINITY_DN18176_c4_g1	TRINITY_DN47447_c8_g1	TRINITY_DN22235_c7_g1	TRINITY_DN23992_c1_g1	TRINITY_DN21160_c5_g2		TRINITY_DN4493_c3_g1	TRINITY_DN18469_c3_g1
OG0006688	NA	NA	UP	NA	NA	NA	NA	DW	NA	7	1	1	1	2	OG0006688	TRINITY_DN4669_c0_g1		TRINITY_DN40518_c0_g1	TRINITY_DN20014_c0_g1	TRINITY_DN12870_c0_g1	TRINITY_DN20029_c2_g1	TRINITY_DN15832_c0_g1		TRINITY_DN46089_c0_g1
OG0006801	NA	NA	UP	NA	NA	NA	DW	NA	NA	7	1	1	1	2	OG0006801	TRINITY_DN5561_c0_g1	TRINITY_DN17138_c5_g2	TRINITY_DN37488_c0_g1	TRINITY_DN24544_c4_g1	TRINITY_DN25133_c1_g2	TRINITY_DN18444_c4_g1	TRINITY_DN27610_c0_g1	TRINITY_DN47587_c0_g2
OG0006815	NA	NA	NA	NA	UP	NA	NA	DW	NA	7	1	1	1	2	OG0006815	TRINITY_DN5681_c6_g1	TRINITY_DN38458_c0_g1	TRINITY_DN71063_c0_g1	TRINITY_DN22823_c3_g1	TRINITY_DN20397_c3_g1	TRINITY_DN15508_c2_g2	TRINITY_DN19762_c5_g1		TRINITY_DN18322_c1_g1
OG0006827	NA	NA	NA	DW	UP	NA	NA	NA	NA	7	1	1	1	2	OG0006827	TRINITY_DN5814_c4_g1	TRINITY_DN14603_c0_g2	TRINITY_DN46752_c0_g1	TRINITY_DN24639_c5_g1	TRINITY_DN16389_c0_g2	TRINITY_DN17706_c3_g1		TRINITY_DN540_c3_g2	TRINITY_DN22075_c10_g4
OG0006915	NA	NA	UP	NA	NA	NA	NA	DW	NA	7	1	1	1	2	OG0006915	TRINITY_DN6609_c0_g1	TRINITY_DN18132_c3_g1	TRINITY_DN45259_c7_g1	TRINITY_DN22535_c8_g1	TRINITY_DN20249_c8_g1	TRINITY_DN14852_c2_g1	TRINITY_DN20954_c1_g1		TRINITY_DN56542_c0_g1
OG0006928	NA	NA	UP	NA	NA	NA	NA	DW	NA	7	1	1	1	2	OG0006928	TRINITY_DN6796_c0_g2	TRINITY_DN17178_c5_g2	TRINITY_DN38773_c0_g1	TRINITY_DN23650_c2_g1	TRINITY_DN36956_c0_g1		TRINITY_DN18143_c7_g1		TRINITY_DN21110_c6_g1
OG0006946	NA	NA	NA	UP	NA	NA	NA	DW	NA	7	1	1	1	2	OG0006946	TRINITY_DN697_c1_g2	TRINITY_DN18002_c7_g3	TRINITY_DN47324_c0_g1	TRINITY_DN24722_c6_g1	TRINITY_DN24317_c4_g1	TRINITY_DN18281_c3_g1	TRINITY_DN20158_c6_g1		TRINITY_DN19511_c3_g1
OG0006969	NA	NA	DW	NA	NA	NA	NA	UP	NA	7	1	1	1	2	OG0006969	TRINITY_DN7287_c1_g1	TRINITY_DN15787_c0_g1	TRINITY_DN39270_c0_g1	TRINITY_DN15599_c1_g1	TRINITY_DN25008_c1_g2	TRINITY_DN12241_c0_g2	TRINITY_DN16376_c0_g1	TRINITY_DN6689_c0_g1
OG0007064	NA	NA	UP	NA	NA	NA	NA	DW	NA	7	1	1	1	2	OG0007064	TRINITY_DN866_c0_g2	TRINITY_DN17842_c5_g2	TRINITY_DN26485_c0_g1	TRINITY_DN23264_c8_g1	TRINITY_DN19827_c10_g2	TRINITY_DN15142_c8_g2	TRINITY_DN17605_c7_g4		TRINITY_DN22594_c5_g1
OG0007119	NA	NA	UP	DW	NA	NA	NA	NA	NA	7	1	1	1	2	OG0007119	TRINITY_DN9504_c0_g1		TRINITY_DN27146_c0_g1	TRINITY_DN19307_c0_g1	TRINITY_DN19301_c2_g1	TRINITY_DN9812_c0_g1	TRINITY_DN632_c0_g1	TRINITY_DN64891_c0_g1	TRINITY_DN17813_c0_g1
OG0007138	NA	NA	UP	NA	NA	NA	NA	DW	NA	7	1	1	1	2	OG0007138	TRINITY_DN975_c2_g1	TRINITY_DN15221_c0_g1	TRINITY_DN64173_c0_g1	TRINITY_DN24112_c4_g2		TRINITY_DN18564_c4_g1	TRINITY_DN15182_c0_g1		TRINITY_DN19056_c5_g4
OG0007176	NA	NA	UP	NA	NA	NA	NA	DW	NA	7	1	1	1	2	OG0007176		TRINITY_DN16322_c6_g2	TRINITY_DN43303_c9_g1	TRINITY_DN23474_c6_g4	TRINITY_DN18893_c6_g1	TRINITY_DN16728_c4_g2	TRINITY_DN21285_c0_g1		TRINITY_DN23563_c0_g1
OG0007203	NA	NA	UP	NA	NA	NA	NA	DW	NA	7	1	1	1	2	OG0007203		TRINITY_DN16874_c7_g3	TRINITY_DN46126_c2_g1	TRINITY_DN21852_c9_g6	TRINITY_DN22061_c5_g1	TRINITY_DN20703_c6_g1	TRINITY_DN19494_c5_g2		TRINITY_DN21606_c3_g2
OG0007239	NA	NA	UP	NA	DW	NA	NA	NA	NA	7	1	1	1	2	OG0007239		TRINITY_DN17628_c3_g2	TRINITY_DN10669_c0_g1	TRINITY_DN16714_c0_g2	TRINITY_DN190_c0_g1	TRINITY_DN5995_c0_g1	TRINITY_DN21047_c1_g1	TRINITY_DN15878_c0_g1	TRINITY_DN22311_c7_g1
OG0007256	NA	NA	UP	NA	NA	NA	NA	DW	NA	7	1	1	1	2	OG0007256		TRINITY_DN18018_c6_g2	TRINITY_DN28954_c0_g1	TRINITY_DN22388_c4_g2	TRINITY_DN18185_c7_g1	TRINITY_DN15932_c6_g4	TRINITY_DN18888_c4_g1		TRINITY_DN23696_c8_g2
OG0007392	NA	NA	NA	NA	UP	NA	NA	NA	DW	7	1	1	1	2	OG0007392			TRINITY_DN41759_c3_g1	TRINITY_DN14900_c0_g1	TRINITY_DN37362_c0_g1	TRINITY_DN19207_c8_g5	TRINITY_DN21099_c10_g1	TRINITY_DN23652_c3_g1	TRINITY_DN18627_c2_g2
OG0007447	UP	NA	NA	NA	NA	NA	NA	DW	NA	7	1	1	1	2	OG0007447	TRINITY_DN1079_c1_g1	TRINITY_DN19688_c5_g2	TRINITY_DN44205_c0_g1	TRINITY_DN22171_c7_g2	TRINITY_DN24032_c2_g3		TRINITY_DN20492_c5_g1		TRINITY_DN18921_c6_g1
OG0007486	NA	NA	UP	NA	NA	NA	NA	DW	NA	7	1	1	1	2	OG0007486	TRINITY_DN12154_c0_g2	TRINITY_DN14560_c0_g1	TRINITY_DN44168_c8_g1	TRINITY_DN24181_c5_g5	TRINITY_DN24221_c5_g1	TRINITY_DN21106_c6_g1	TRINITY_DN19575_c9_g5
OG0007493	NA	NA	UP	NA	NA	NA	NA	DW	NA	7	1	1	1	2	OG0007493	TRINITY_DN12465_c1_g1	TRINITY_DN19753_c8_g3	TRINITY_DN42413_c4_g1	TRINITY_DN22975_c8_g1	TRINITY_DN25130_c4_g4	TRINITY_DN15196_c2_g1	TRINITY_DN21145_c12_g6
OG0007544	NA	NA	UP	NA	NA	NA	NA	DW	NA	7	1	1	1	2	OG0007544	TRINITY_DN145_c29_g1	TRINITY_DN18364_c2_g1	TRINITY_DN64861_c0_g1	TRINITY_DN22419_c7_g2	TRINITY_DN19573_c3_g3	TRINITY_DN18377_c6_g1			TRINITY_DN18499_c9_g1
OG0007559	UP	NA	NA	NA	NA	NA	NA	DW	NA	7	1	1	1	2	OG0007559	TRINITY_DN1555_c1_g1	TRINITY_DN35582_c0_g1	TRINITY_DN45202_c2_g2	TRINITY_DN22768_c3_g1	TRINITY_DN17354_c0_g1		TRINITY_DN18824_c2_g2		TRINITY_DN51397_c0_g1
OG0007587	NA	NA	UP	NA	NA	NA	NA	DW	NA	7	1	1	1	2	OG0007587	TRINITY_DN16780_c5_g1	TRINITY_DN16971_c4_g3	TRINITY_DN48136_c0_g1		TRINITY_DN21738_c4_g1	TRINITY_DN12935_c7_g4	TRINITY_DN39442_c0_g1		TRINITY_DN47219_c0_g1
OG0007610	NA	NA	UP	NA	NA	NA	NA	DW	NA	7	1	1	1	2	OG0007610	TRINITY_DN17959_c0_g1	TRINITY_DN19223_c8_g1	TRINITY_DN26810_c0_g1	TRINITY_DN18106_c0_g1	TRINITY_DN23390_c6_g2	TRINITY_DN13139_c5_g3	TRINITY_DN43287_c0_g1
OG0007622	NA	NA	UP	NA	NA	NA	NA	DW	NA	7	1	1	1	2	OG0007622	TRINITY_DN18524_c0_g1	TRINITY_DN16100_c0_g2	TRINITY_DN39832_c0_g1	TRINITY_DN23962_c1_g6	TRINITY_DN23983_c7_g1	TRINITY_DN13263_c4_g1	TRINITY_DN20675_c3_g2
OG0007660	UP	NA	NA	NA	NA	NA	NA	DW	NA	7	1	1	1	2	OG0007660	TRINITY_DN2028_c0_g3	TRINITY_DN18216_c3_g3	TRINITY_DN42271_c8_g1	TRINITY_DN23360_c8_g1	TRINITY_DN21467_c8_g1	TRINITY_DN21200_c7_g1	TRINITY_DN18133_c9_g1
OG0007694	UP	NA	NA	NA	NA	NA	NA	DW	NA	7	1	1	1	2	OG0007694	TRINITY_DN22172_c9_g1	TRINITY_DN20045_c0_g1	TRINITY_DN59995_c0_g1	TRINITY_DN6385_c0_g2	TRINITY_DN24772_c2_g3	TRINITY_DN14804_c0_g1	TRINITY_DN39663_c0_g1
OG0007713	NA	NA	UP	NA	NA	NA	NA	DW	NA	7	1	1	1	2	OG0007713	TRINITY_DN2325_c10_g1	TRINITY_DN15902_c1_g2	TRINITY_DN18614_c0_g1	TRINITY_DN20522_c0_g2	TRINITY_DN22611_c1_g3	TRINITY_DN17005_c5_g6	TRINITY_DN14256_c0_g2
OG0007758	NA	NA	UP	NA	NA	NA	NA	DW	NA	7	1	1	1	2	OG0007758	TRINITY_DN2572_c2_g1	TRINITY_DN14741_c0_g1	TRINITY_DN45222_c1_g1	TRINITY_DN23038_c1_g1	TRINITY_DN21951_c4_g4	TRINITY_DN17882_c2_g5	TRINITY_DN21284_c0_g1
OG0007792	NA	NA	UP	NA	NA	NA	NA	DW	NA	7	1	1	1	2	OG0007792	TRINITY_DN2830_c0_g1	TRINITY_DN18849_c0_g5	TRINITY_DN41045_c0_g1		TRINITY_DN18270_c4_g1	TRINITY_DN19572_c1_g1	TRINITY_DN17915_c1_g2		TRINITY_DN22439_c1_g2
OG0007815	NA	NA	DW	NA	NA	NA	NA	UP	NA	7	1	1	1	2	OG0007815	TRINITY_DN29886_c1_g1	TRINITY_DN19760_c0_g1	TRINITY_DN36962_c0_g1	TRINITY_DN30767_c0_g1		TRINITY_DN19445_c14_g2		TRINITY_DN6854_c0_g1	TRINITY_DN19622_c13_g2
OG0007933	NA	NA	DW	NA	UP	NA	NA	NA	NA	7	1	1	1	2	OG0007933	TRINITY_DN43109_c1_g1		TRINITY_DN42024_c1_g1		TRINITY_DN16631_c0_g1	TRINITY_DN14457_c10_g1	TRINITY_DN16404_c0_g4	TRINITY_DN11868_c0_g2	TRINITY_DN22307_c8_g4
OG0007939	NA	NA	UP	DW	NA	NA	NA	NA	NA	7	1	1	1	2	OG0007939	TRINITY_DN4385_c4_g1		TRINITY_DN43289_c6_g1	TRINITY_DN22377_c8_g2		TRINITY_DN19510_c1_g5	TRINITY_DN19551_c9_g1	TRINITY_DN6087_c0_g1	TRINITY_DN22934_c2_g1
OG0007950	NA	NA	NA	NA	UP	NA	NA	NA	DW	7	1	1	1	2	OG0007950	TRINITY_DN446_c2_g2	TRINITY_DN18904_c6_g4	TRINITY_DN44109_c3_g4	TRINITY_DN23487_c9_g1	TRINITY_DN24182_c2_g2			TRINITY_DN4852_c0_g2	TRINITY_DN18407_c9_g1
OG0007971	NA	NA	DW	NA	UP	NA	NA	NA	NA	7	1	1	1	2	OG0007971	TRINITY_DN4686_c0_g1	TRINITY_DN16906_c5_g1	TRINITY_DN16818_c0_g1		TRINITY_DN19877_c5_g1	TRINITY_DN18474_c13_g2		TRINITY_DN7770_c1_g1	TRINITY_DN22387_c5_g1
OG0007989	NA	NA	UP	DW	NA	NA	NA	NA	NA	7	1	1	1	2	OG0007989	TRINITY_DN487_c4_g2	TRINITY_DN15177_c0_g1	TRINITY_DN41870_c9_g1	TRINITY_DN24251_c14_g2	TRINITY_DN20816_c3_g1			TRINITY_DN10655_c0_g1	TRINITY_DN19649_c1_g1
OG0008007	NA	NA	NA	DW	NA	NA	NA	UP	NA	7	1	1	1	2	OG0008007	TRINITY_DN51207_c0_g1	TRINITY_DN8989_c0_g1		TRINITY_DN23262_c15_g1	TRINITY_DN23296_c4_g2		TRINITY_DN21223_c10_g1	TRINITY_DN44576_c0_g1	TRINITY_DN21370_c1_g1
OG0008018	NA	NA	NA	NA	NA	NA	NA	DW	UP	7	1	1	1	2	OG0008018	TRINITY_DN5296_c1_g1	TRINITY_DN18454_c6_g1	TRINITY_DN42025_c0_g1	TRINITY_DN24006_c5_g4	TRINITY_DN22265_c4_g1		TRINITY_DN20988_c1_g1		TRINITY_DN22281_c11_g1
OG0008044	UP	NA	NA	NA	NA	NA	NA	DW	NA	7	1	1	1	2	OG0008044	TRINITY_DN5530_c3_g1	TRINITY_DN19710_c7_g5	TRINITY_DN48783_c0_g1		TRINITY_DN19796_c5_g1	TRINITY_DN16604_c3_g3	TRINITY_DN19655_c4_g1		TRINITY_DN23018_c8_g3
OG0008046	NA	NA	UP	NA	NA	NA	NA	DW	NA	7	1	1	1	2	OG0008046	TRINITY_DN5564_c0_g2	TRINITY_DN15555_c0_g1	TRINITY_DN28608_c0_g1	TRINITY_DN17229_c0_g1	TRINITY_DN24449_c6_g2	TRINITY_DN17536_c2_g1	TRINITY_DN15442_c0_g1
OG0008096	NA	NA	UP	DW	NA	NA	NA	NA	NA	7	1	1	1	2	OG0008096	TRINITY_DN6614_c6_g1		TRINITY_DN90381_c0_g1	TRINITY_DN6377_c0_g1	TRINITY_DN38865_c0_g1		TRINITY_DN25623_c0_g1	TRINITY_DN1755_c4_g1	TRINITY_DN22614_c9_g1
OG0008148	NA	NA	UP	NA	NA	NA	NA	DW	NA	7	1	1	1	2	OG0008148	TRINITY_DN795_c26_g1	TRINITY_DN39955_c0_g1	TRINITY_DN44851_c4_g1	TRINITY_DN22859_c6_g3	TRINITY_DN19524_c5_g1	TRINITY_DN25150_c0_g1			TRINITY_DN65692_c0_g1
OG0008182	NA	NA	UP	NA	NA	NA	NA	DW	NA	7	1	1	1	2	OG0008182	TRINITY_DN897_c1_g1	TRINITY_DN19225_c5_g2	TRINITY_DN46244_c1_g1	TRINITY_DN22464_c10_g1	TRINITY_DN24396_c3_g1	TRINITY_DN15508_c5_g1	TRINITY_DN21185_c3_g5
OG0008189	NA	NA	NA	NA	UP	NA	NA	DW	NA	7	1	1	1	2	OG0008189	TRINITY_DN929_c1_g2	TRINITY_DN16551_c4_g1	TRINITY_DN45346_c1_g1	TRINITY_DN23254_c8_g7	TRINITY_DN17645_c0_g1		TRINITY_DN19415_c8_g1		TRINITY_DN23176_c9_g1
OG0008203	UP	NA	NA	NA	NA	NA	NA	DW	NA	7	1	1	1	2	OG0008203	TRINITY_DN976_c0_g2		TRINITY_DN48070_c9_g1	TRINITY_DN22378_c1_g1	TRINITY_DN23335_c2_g1	TRINITY_DN16165_c2_g1	TRINITY_DN19254_c7_g1		TRINITY_DN22558_c4_g3
OG0008209	UP	NA	NA	NA	NA	NA	NA	DW	NA	7	1	1	1	2	OG0008209	TRINITY_DN9898_c8_g1	TRINITY_DN16435_c1_g2	TRINITY_DN82773_c0_g1	TRINITY_DN20026_c0_g2	TRINITY_DN21364_c2_g2		TRINITY_DN34815_c0_g1		TRINITY_DN17376_c0_g1
OG0008240	NA	NA	UP	NA	NA	NA	NA	DW	NA	7	1	1	1	2	OG0008240		TRINITY_DN15279_c0_g1	TRINITY_DN38137_c0_g1	TRINITY_DN20439_c0_g1	TRINITY_DN17170_c0_g1	TRINITY_DN13097_c3_g1	TRINITY_DN16944_c0_g1		TRINITY_DN23043_c4_g2
OG0008248	NA	NA	DW	NA	UP	NA	NA	NA	NA	7	1	1	1	2	OG0008248		TRINITY_DN15958_c0_g1	TRINITY_DN44725_c2_g1	TRINITY_DN22709_c4_g3	TRINITY_DN19373_c3_g1		TRINITY_DN20362_c12_g1	TRINITY_DN11918_c0_g2	TRINITY_DN21555_c2_g1
OG0008332	NA	NA	NA	NA	UP	NA	NA	DW	NA	7	1	1	1	2	OG0008332		TRINITY_DN18031_c2_g4	TRINITY_DN45020_c4_g1	TRINITY_DN22649_c5_g2	TRINITY_DN18804_c9_g3	TRINITY_DN16137_c2_g2	TRINITY_DN15399_c0_g1		TRINITY_DN21232_c3_g1
OG0008354	NA	NA	UP	NA	NA	NA	NA	DW	NA	7	1	1	1	2	OG0008354		TRINITY_DN18462_c5_g2	TRINITY_DN89116_c0_g1	TRINITY_DN13788_c0_g1	TRINITY_DN20567_c2_g1	TRINITY_DN19691_c3_g1	TRINITY_DN8960_c0_g1		TRINITY_DN23115_c7_g1
OG0008398	NA	NA	UP	NA	NA	NA	NA	DW	NA	7	1	1	1	2	OG0008398		TRINITY_DN19382_c6_g3	TRINITY_DN25810_c0_g1	TRINITY_DN17568_c0_g1	TRINITY_DN23314_c3_g5	TRINITY_DN15212_c1_g2	TRINITY_DN18430_c5_g6		TRINITY_DN18719_c4_g1
OG0008412	NA	NA	NA	NA	NA	NA	NA	DW	UP	7	1	1	1	2	OG0008412		TRINITY_DN19524_c4_g2	TRINITY_DN23117_c0_g1	TRINITY_DN18240_c0_g1	TRINITY_DN24699_c4_g1	TRINITY_DN16110_c1_g1	TRINITY_DN19853_c1_g1		TRINITY_DN19029_c5_g1
OG0008419	NA	NA	UP	NA	NA	NA	NA	DW	NA	7	1	1	1	2	OG0008419		TRINITY_DN19725_c1_g1	TRINITY_DN45832_c0_g1	TRINITY_DN23475_c8_g2	TRINITY_DN23952_c6_g2	TRINITY_DN14843_c1_g1	TRINITY_DN18953_c6_g1		TRINITY_DN20890_c3_g1
OG0008424	NA	NA	UP	NA	NA	NA	NA	DW	NA	7	1	1	1	2	OG0008424		TRINITY_DN19803_c1_g3	TRINITY_DN49042_c0_g1	TRINITY_DN18662_c0_g1	TRINITY_DN25255_c8_g2	TRINITY_DN15683_c11_g4	TRINITY_DN17709_c7_g2		TRINITY_DN18291_c0_g1
OG0008435	NA	NA	DW	NA	NA	NA	NA	UP	NA	7	1	1	1	2	OG0008435		TRINITY_DN2952_c0_g1	TRINITY_DN43021_c11_g3		TRINITY_DN20996_c3_g1	TRINITY_DN18851_c1_g1	TRINITY_DN17797_c7_g3	TRINITY_DN10632_c0_g1	TRINITY_DN19947_c8_g5
OG0000157	NA	NA	NA	NA	NA	NA	NA	DW	NA	8	1	0	1	1	OG0000157	TRINITY_DN5383_c2_g1	TRINITY_DN17086_c3_g1	TRINITY_DN48522_c1_g2	TRINITY_DN21834_c8_g9	TRINITY_DN24400_c3_g1	TRINITY_DN14451_c8_g1	TRINITY_DN18467_c2_g4	TRINITY_DN191_c1_g3	TRINITY_DN22837_c8_g10
OG0000225	NA	NA	NA	NA	NA	NA	NA	UP	NA	8	0	1	1	1	OG0000225	TRINITY_DN3_c0_g3	TRINITY_DN17674_c8_g8	TRINITY_DN46175_c1_g4	TRINITY_DN21970_c7_g1	TRINITY_DN24428_c0_g1	TRINITY_DN19443_c5_g3	TRINITY_DN17988_c7_g1	TRINITY_DN5782_c0_g2	TRINITY_DN20237_c10_g1
OG0000289	NA	NA	DW	NA	NA	NA	NA	NA	NA	8	1	0	1	1	OG0000289	TRINITY_DN4279_c0_g2	TRINITY_DN16748_c6_g1	TRINITY_DN48883_c6_g1	TRINITY_DN24457_c8_g1	TRINITY_DN25071_c8_g2	TRINITY_DN21057_c4_g1	TRINITY_DN20489_c1_g1	TRINITY_DN7164_c0_g1	TRINITY_DN23559_c8_g1
OG0000310	NA	NA	DW	NA	NA	NA	NA	NA	NA	8	1	0	1	1	OG0000310	TRINITY_DN13_c14_g2	TRINITY_DN16877_c7_g4	TRINITY_DN48787_c4_g1	TRINITY_DN22206_c8_g2	TRINITY_DN21583_c4_g1	TRINITY_DN16752_c5_g4	TRINITY_DN20312_c5_g2	TRINITY_DN565_c2_g1	TRINITY_DN21013_c6_g1
OG0000313	NA	NA	UP	NA	NA	NA	NA	NA	NA	8	0	1	1	1	OG0000313	TRINITY_DN145_c12_g1	TRINITY_DN17879_c2_g1	TRINITY_DN46287_c1_g1	TRINITY_DN23452_c12_g1	TRINITY_DN24073_c10_g1	TRINITY_DN17765_c4_g1	TRINITY_DN18837_c4_g2	TRINITY_DN760_c0_g1	TRINITY_DN22882_c4_g1
OG0000320	NA	NA	NA	NA	NA	NA	NA	UP	NA	8	0	1	1	1	OG0000320	TRINITY_DN24_c1_g1	TRINITY_DN17981_c5_g1	TRINITY_DN48589_c2_g2	TRINITY_DN23453_c6_g1	TRINITY_DN23841_c8_g1	TRINITY_DN13446_c3_g1	TRINITY_DN19055_c8_g1	TRINITY_DN3104_c0_g2	TRINITY_DN18324_c7_g1
OG0000355	NA	NA	UP	NA	NA	NA	NA	NA	NA	8	0	1	1	1	OG0000355	TRINITY_DN1306_c1_g2	TRINITY_DN18672_c6_g5	TRINITY_DN43440_c4_g6	TRINITY_DN22748_c6_g1	TRINITY_DN21707_c3_g2	TRINITY_DN18634_c7_g1	TRINITY_DN21080_c8_g1	TRINITY_DN440_c1_g1	TRINITY_DN20505_c4_g2
OG0000360	NA	NA	NA	NA	NA	NA	NA	UP	NA	8	0	1	1	1	OG0000360	TRINITY_DN1557_c1_g2	TRINITY_DN17682_c0_g1	TRINITY_DN47822_c0_g2	TRINITY_DN23783_c13_g1	TRINITY_DN23163_c5_g1	TRINITY_DN21397_c8_g1	TRINITY_DN19507_c6_g2	TRINITY_DN156_c4_g1	TRINITY_DN18748_c8_g1
OG0000373	NA	NA	NA	NA	UP	NA	NA	NA	NA	8	0	1	1	1	OG0000373	TRINITY_DN22585_c2_g1	TRINITY_DN5170_c0_g1	TRINITY_DN73556_c0_g1	TRINITY_DN54218_c0_g1	TRINITY_DN17609_c0_g1	TRINITY_DN11754_c0_g2	TRINITY_DN46776_c0_g1	TRINITY_DN59282_c1_g1	TRINITY_DN23015_c6_g2
OG0000378	NA	NA	UP	NA	NA	NA	NA	NA	NA	8	0	1	1	1	OG0000378	TRINITY_DN29261_c16_g1	TRINITY_DN16269_c1_g6	TRINITY_DN44599_c0_g2	TRINITY_DN15223_c0_g2	TRINITY_DN24936_c8_g1	TRINITY_DN17221_c6_g2	TRINITY_DN19764_c4_g7	TRINITY_DN16968_c13_g1	TRINITY_DN22536_c9_g9
OG0000402	DW	NA	NA	NA	NA	NA	NA	NA	NA	8	1	0	1	1	OG0000402	TRINITY_DN7863_c0_g1	TRINITY_DN18994_c5_g1	TRINITY_DN47393_c0_g1	TRINITY_DN22283_c2_g1	TRINITY_DN23468_c4_g1	TRINITY_DN16924_c4_g1	TRINITY_DN16304_c0_g1	TRINITY_DN1011_c7_g2	TRINITY_DN21682_c9_g3
OG0000418	NA	NA	NA	NA	UP	NA	NA	NA	NA	8	0	1	1	1	OG0000418	TRINITY_DN10758_c1_g2	TRINITY_DN33955_c0_g1	TRINITY_DN11051_c0_g1	TRINITY_DN24646_c2_g1	TRINITY_DN19702_c3_g2	TRINITY_DN18858_c4_g1	TRINITY_DN18007_c11_g1	TRINITY_DN20775_c0_g2	TRINITY_DN21338_c5_g2
OG0000450	NA	NA	UP	NA	NA	NA	NA	NA	NA	8	0	1	1	1	OG0000450	TRINITY_DN23900_c0_g1	TRINITY_DN12816_c0_g2	TRINITY_DN23247_c0_g1	TRINITY_DN22913_c1_g1	TRINITY_DN48341_c0_g1	TRINITY_DN14595_c8_g1	TRINITY_DN16080_c0_g3	TRINITY_DN55708_c0_g1	TRINITY_DN22126_c7_g1
OG0000479	NA	NA	DW	NA	NA	NA	NA	NA	NA	8	1	0	1	1	OG0000479	TRINITY_DN41295_c2_g1	TRINITY_DN15422_c0_g1	TRINITY_DN32130_c0_g1	TRINITY_DN7967_c0_g2	TRINITY_DN23279_c6_g2	TRINITY_DN18658_c6_g2	TRINITY_DN17156_c0_g1	TRINITY_DN42026_c1_g1	TRINITY_DN22084_c12_g1
OG0000484	DW	NA	NA	NA	NA	NA	NA	NA	NA	8	1	0	1	1	OG0000484	TRINITY_DN5395_c0_g2	TRINITY_DN17018_c4_g1	TRINITY_DN45239_c0_g2	TRINITY_DN22017_c7_g1	TRINITY_DN22898_c8_g3	TRINITY_DN18467_c3_g2	TRINITY_DN18693_c2_g5	TRINITY_DN4737_c0_g3	TRINITY_DN23407_c4_g1
OG0000491	NA	NA	NA	NA	NA	NA	NA	NA	UP	8	0	1	1	1	OG0000491	TRINITY_DN7785_c0_g2	TRINITY_DN17678_c4_g1	TRINITY_DN48016_c4_g2	TRINITY_DN24129_c8_g3	TRINITY_DN19186_c8_g1	TRINITY_DN14371_c3_g1	TRINITY_DN19622_c4_g2	TRINITY_DN2928_c0_g1	TRINITY_DN19412_c7_g2
OG0000512	NA	NA	NA	NA	NA	NA	NA	UP	NA	8	0	1	1	1	OG0000512	TRINITY_DN12155_c1_g2		TRINITY_DN46470_c5_g1	TRINITY_DN22273_c6_g1	TRINITY_DN36999_c0_g1	TRINITY_DN9387_c0_g2	TRINITY_DN9607_c0_g1	TRINITY_DN4328_c5_g2	TRINITY_DN23955_c3_g1
OG0000522	NA	NA	DW	NA	NA	NA	NA	NA	NA	8	1	0	1	1	OG0000522	TRINITY_DN155_c0_g1	TRINITY_DN19734_c6_g1	TRINITY_DN46914_c1_g1	TRINITY_DN24816_c7_g1	TRINITY_DN25171_c4_g1	TRINITY_DN14782_c12_g2	TRINITY_DN20910_c3_g2	TRINITY_DN265_c0_g3	TRINITY_DN23795_c6_g3
OG0000526	NA	NA	UP	NA	NA	NA	NA	NA	NA	8	0	1	1	1	OG0000526	TRINITY_DN16950_c2_g1	TRINITY_DN13660_c0_g1	TRINITY_DN92652_c0_g1	TRINITY_DN19092_c0_g1	TRINITY_DN5647_c0_g1	TRINITY_DN12956_c2_g3	TRINITY_DN18926_c6_g1	TRINITY_DN22957_c0_g2	TRINITY_DN23189_c6_g1
OG0000530	NA	NA	DW	NA	NA	NA	NA	NA	NA	8	1	0	1	1	OG0000530	TRINITY_DN19596_c0_g1	TRINITY_DN17026_c8_g1	TRINITY_DN706_c0_g1	TRINITY_DN23934_c8_g9	TRINITY_DN22184_c1_g1	TRINITY_DN19478_c4_g1	TRINITY_DN17623_c9_g7	TRINITY_DN7202_c0_g2	TRINITY_DN21036_c11_g1
OG0000531	NA	NA	DW	NA	NA	NA	NA	NA	NA	8	1	0	1	1	OG0000531	TRINITY_DN5491_c2_g1	TRINITY_DN18172_c7_g2	TRINITY_DN42536_c7_g3	TRINITY_DN24722_c3_g1	TRINITY_DN18764_c7_g1	TRINITY_DN15528_c0_g1	TRINITY_DN18697_c12_g1	TRINITY_DN4659_c0_g1
OG0000535	NA	NA	UP	NA	NA	NA	NA	NA	NA	8	0	1	1	1	OG0000535	TRINITY_DN222_c25_g3	TRINITY_DN16248_c11_g1	TRINITY_DN48188_c2_g2	TRINITY_DN23973_c7_g3	TRINITY_DN21827_c1_g1	TRINITY_DN13616_c3_g1	TRINITY_DN18186_c4_g2	TRINITY_DN3290_c5_g1	TRINITY_DN18631_c4_g2
OG0000544	NA	NA	DW	NA	NA	NA	NA	NA	NA	8	1	0	1	1	OG0000544	TRINITY_DN8415_c0_g1	TRINITY_DN15604_c0_g1	TRINITY_DN44485_c8_g1	TRINITY_DN19332_c0_g1	TRINITY_DN22022_c3_g1	TRINITY_DN17663_c4_g1	TRINITY_DN17264_c0_g1	TRINITY_DN3649_c0_g3	TRINITY_DN19790_c4_g3
OG0000549	NA	NA	DW	NA	NA	NA	NA	NA	NA	8	1	0	1	1	OG0000549	TRINITY_DN307_c2_g1	TRINITY_DN18925_c6_g1	TRINITY_DN42732_c0_g7	TRINITY_DN22591_c3_g2	TRINITY_DN19768_c6_g1	TRINITY_DN20488_c2_g1	TRINITY_DN17721_c6_g3	TRINITY_DN124_c3_g1	TRINITY_DN23497_c3_g3
OG0000553	NA	NA	NA	NA	NA	NA	NA	DW	NA	8	1	0	1	1	OG0000553	TRINITY_DN345_c15_g1	TRINITY_DN18498_c6_g4	TRINITY_DN47751_c0_g1	TRINITY_DN23719_c3_g7	TRINITY_DN21122_c5_g9	TRINITY_DN18113_c2_g3	TRINITY_DN20340_c1_g1	TRINITY_DN1139_c1_g3	TRINITY_DN34809_c0_g1
OG0000559	NA	NA	NA	NA	DW	NA	NA	NA	NA	8	1	0	1	1	OG0000559	TRINITY_DN408_c9_g1	TRINITY_DN16179_c10_g1	TRINITY_DN44026_c4_g2	TRINITY_DN22407_c3_g12	TRINITY_DN18653_c2_g3	TRINITY_DN18266_c3_g3	TRINITY_DN18157_c6_g1	TRINITY_DN882_c0_g1	TRINITY_DN23890_c9_g2
OG0000560	NA	NA	DW	NA	NA	NA	NA	NA	NA	8	1	0	1	1	OG0000560	TRINITY_DN429_c2_g1	TRINITY_DN19490_c5_g4	TRINITY_DN48211_c3_g3	TRINITY_DN23427_c6_g1	TRINITY_DN24851_c5_g1	TRINITY_DN20797_c4_g2	TRINITY_DN19744_c6_g1	TRINITY_DN720_c0_g2	TRINITY_DN23010_c3_g1
OG0000575	NA	NA	NA	NA	DW	NA	NA	NA	NA	8	1	0	1	1	OG0000575		TRINITY_DN15371_c0_g1	TRINITY_DN32748_c0_g1	TRINITY_DN32353_c0_g1	TRINITY_DN17858_c0_g1	TRINITY_DN29944_c0_g1	TRINITY_DN16078_c0_g1	TRINITY_DN3731_c0_g2	TRINITY_DN22901_c2_g4
OG0000582	NA	NA	NA	NA	UP	NA	NA	NA	NA	8	0	1	1	1	OG0000582		TRINITY_DN24574_c0_g1	TRINITY_DN36598_c0_g2	TRINITY_DN53223_c0_g1	TRINITY_DN47472_c0_g1	TRINITY_DN32661_c0_g1	TRINITY_DN22805_c0_g1	TRINITY_DN13801_c8_g1	TRINITY_DN20238_c4_g4
OG0000595	NA	NA	NA	NA	DW	NA	NA	NA	NA	8	1	0	1	1	OG0000595	TRINITY_DN1296_c1_g3	TRINITY_DN17919_c4_g2	TRINITY_DN48433_c1_g5	TRINITY_DN21880_c7_g1	TRINITY_DN20399_c4_g1	TRINITY_DN18276_c7_g1	TRINITY_DN18774_c8_g6	TRINITY_DN4080_c2_g2	TRINITY_DN22524_c6_g3
OG0000596	NA	NA	DW	NA	NA	NA	NA	NA	NA	8	1	0	1	1	OG0000596	TRINITY_DN130_c0_g2	TRINITY_DN18291_c4_g8	TRINITY_DN48743_c8_g1	TRINITY_DN24380_c8_g1	TRINITY_DN23982_c4_g1	TRINITY_DN14717_c2_g1	TRINITY_DN19658_c5_g1	TRINITY_DN3002_c0_g1	TRINITY_DN21529_c5_g1
OG0000605	NA	NA	NA	NA	NA	NA	NA	UP	NA	8	0	1	1	1	OG0000605	TRINITY_DN1699_c0_g1	TRINITY_DN17589_c10_g3	TRINITY_DN42949_c2_g1	TRINITY_DN23588_c0_g2	TRINITY_DN24017_c4_g3	TRINITY_DN20902_c11_g1	TRINITY_DN19936_c2_g1	TRINITY_DN3100_c1_g1	TRINITY_DN19699_c2_g2
OG0000608	NA	NA	DW	NA	NA	NA	NA	NA	NA	8	1	0	1	1	OG0000608	TRINITY_DN1792_c0_g1	TRINITY_DN16167_c0_g1	TRINITY_DN42736_c0_g1	TRINITY_DN21403_c10_g1	TRINITY_DN24492_c6_g1	TRINITY_DN13980_c7_g1	TRINITY_DN18112_c6_g2	TRINITY_DN3698_c0_g2	TRINITY_DN41232_c0_g1
OG0000609	NA	NA	DW	NA	NA	NA	NA	NA	NA	8	1	0	1	1	OG0000609	TRINITY_DN18766_c5_g1	TRINITY_DN16624_c9_g1	TRINITY_DN22917_c0_g1	TRINITY_DN7388_c0_g1	TRINITY_DN19346_c6_g1	TRINITY_DN18803_c2_g2	TRINITY_DN19040_c6_g1	TRINITY_DN29030_c5_g1	TRINITY_DN19399_c2_g2
OG0000616	NA	NA	NA	NA	DW	NA	NA	NA	NA	8	1	0	1	1	OG0000616	TRINITY_DN2176_c0_g4	TRINITY_DN14484_c0_g1	TRINITY_DN40565_c0_g1	TRINITY_DN19375_c0_g1	TRINITY_DN16703_c0_g1	TRINITY_DN11920_c0_g2	TRINITY_DN16526_c0_g2	TRINITY_DN1929_c0_g1	TRINITY_DN19447_c3_g2
OG0000618	NA	NA	UP	NA	NA	NA	NA	NA	NA	8	0	1	1	1	OG0000618	TRINITY_DN218_c0_g1	TRINITY_DN19595_c2_g1	TRINITY_DN45980_c7_g2	TRINITY_DN23295_c3_g1	TRINITY_DN24388_c3_g1	TRINITY_DN19923_c4_g1	TRINITY_DN18170_c4_g2	TRINITY_DN1046_c0_g3	TRINITY_DN19370_c2_g2
OG0000620	NA	NA	DW	NA	NA	NA	NA	NA	NA	8	1	0	1	1	OG0000620	TRINITY_DN22870_c1_g1	TRINITY_DN16937_c0_g2	TRINITY_DN42619_c1_g1	TRINITY_DN17716_c0_g1	TRINITY_DN18629_c6_g2	TRINITY_DN5763_c0_g1	TRINITY_DN15954_c0_g1	TRINITY_DN2131_c3_g1	TRINITY_DN22849_c7_g2
OG0000621	NA	NA	UP	NA	NA	NA	NA	NA	NA	8	0	1	1	1	OG0000621	TRINITY_DN23893_c5_g1	TRINITY_DN18656_c5_g1	TRINITY_DN34865_c0_g1	TRINITY_DN23235_c7_g3	TRINITY_DN34147_c0_g1	TRINITY_DN13212_c1_g2	TRINITY_DN20464_c2_g2	TRINITY_DN62807_c0_g1	TRINITY_DN23351_c1_g1
OG0000622	NA	NA	DW	NA	NA	NA	NA	NA	NA	8	1	0	1	1	OG0000622	TRINITY_DN2429_c0_g1	TRINITY_DN19746_c11_g2	TRINITY_DN38282_c0_g1	TRINITY_DN24410_c6_g1	TRINITY_DN20112_c9_g1	TRINITY_DN19967_c7_g1	TRINITY_DN20149_c0_g1	TRINITY_DN905_c0_g3	TRINITY_DN22789_c5_g1
OG0000630	NA	NA	DW	NA	NA	NA	NA	NA	NA	8	1	0	1	1	OG0000630	TRINITY_DN27501_c1_g1	TRINITY_DN11047_c0_g1	TRINITY_DN6698_c0_g1	TRINITY_DN4401_c0_g1	TRINITY_DN7652_c0_g2	TRINITY_DN16808_c5_g1	TRINITY_DN4911_c0_g2	TRINITY_DN10616_c0_g2	TRINITY_DN20495_c1_g2
OG0000640	NA	NA	NA	NA	NA	NA	NA	NA	UP	8	0	1	1	1	OG0000640	TRINITY_DN33502_c1_g1	TRINITY_DN17778_c3_g1	TRINITY_DN60174_c0_g1	TRINITY_DN19179_c0_g1	TRINITY_DN50192_c0_g1	TRINITY_DN3234_c0_g1	TRINITY_DN17186_c0_g1	TRINITY_DN6658_c1_g1	TRINITY_DN22471_c4_g1
OG0000642	NA	NA	NA	NA	NA	NA	NA	DW	NA	8	1	0	1	1	OG0000642	TRINITY_DN3454_c1_g1	TRINITY_DN18816_c3_g1	TRINITY_DN40085_c0_g1	TRINITY_DN23051_c7_g2		TRINITY_DN13514_c8_g1	TRINITY_DN17552_c6_g2		TRINITY_DN23223_c1_g1
OG0000647	NA	NA	NA	NA	NA	NA	DW	NA	NA	8	1	0	1	1	OG0000647	TRINITY_DN36514_c0_g1	TRINITY_DN8385_c0_g1	TRINITY_DN68858_c0_g1	TRINITY_DN61075_c0_g1	TRINITY_DN25775_c0_g1	TRINITY_DN9202_c0_g1	TRINITY_DN18914_c7_g2	TRINITY_DN3810_c0_g2	TRINITY_DN19782_c8_g1
OG0000648	NA	NA	NA	NA	NA	NA	NA	DW	NA	8	1	0	1	1	OG0000648	TRINITY_DN36817_c2_g1	TRINITY_DN19753_c2_g1	TRINITY_DN47251_c2_g4	TRINITY_DN37700_c0_g1		TRINITY_DN25902_c0_g1	TRINITY_DN19966_c5_g2		TRINITY_DN19447_c3_g3
OG0000654	NA	NA	NA	NA	UP	NA	NA	NA	NA	8	0	1	1	1	OG0000654	TRINITY_DN4164_c0_g1	TRINITY_DN18754_c6_g1	TRINITY_DN45141_c1_g2	TRINITY_DN23285_c4_g4	TRINITY_DN22625_c7_g1	TRINITY_DN13788_c1_g1	TRINITY_DN18881_c4_g2	TRINITY_DN4722_c0_g1	TRINITY_DN20085_c7_g2
OG0000664	NA	NA	NA	NA	NA	NA	NA	DW	NA	8	1	0	1	1	OG0000664	TRINITY_DN52042_c0_g1	TRINITY_DN19244_c2_g2	TRINITY_DN43026_c0_g1	TRINITY_DN21190_c0_g1	TRINITY_DN19386_c8_g1	TRINITY_DN13512_c8_g1	TRINITY_DN18349_c4_g3		TRINITY_DN21148_c9_g1
OG0000668	NA	NA	DW	NA	NA	NA	NA	NA	NA	8	1	0	1	1	OG0000668	TRINITY_DN5965_c10_g1	TRINITY_DN14879_c0_g1	TRINITY_DN28457_c0_g2	TRINITY_DN30596_c0_g1	TRINITY_DN22821_c2_g1	TRINITY_DN18061_c7_g1	TRINITY_DN14056_c0_g1	TRINITY_DN10311_c2_g1	TRINITY_DN20247_c5_g1
OG0000673	NA	NA	NA	NA	NA	NA	NA	NA	DW	8	1	0	1	1	OG0000673	TRINITY_DN7030_c0_g1	TRINITY_DN15612_c0_g1	TRINITY_DN12830_c0_g1	TRINITY_DN51444_c0_g1	TRINITY_DN33737_c0_g1	TRINITY_DN18938_c7_g1	TRINITY_DN1531_c0_g1	TRINITY_DN24464_c1_g1	TRINITY_DN23030_c1_g1
OG0000684	NA	NA	DW	NA	NA	NA	NA	NA	NA	8	1	0	1	1	OG0000684	TRINITY_DN86_c1_g1	TRINITY_DN19521_c1_g1	TRINITY_DN39576_c0_g1	TRINITY_DN23899_c0_g1	TRINITY_DN23881_c2_g1	TRINITY_DN17291_c6_g2	TRINITY_DN20227_c9_g1	TRINITY_DN100_c0_g2	TRINITY_DN22091_c0_g1
OG0000687	NA	NA	NA	NA	NA	NA	NA	DW	NA	8	1	0	1	1	OG0000687	TRINITY_DN90_c0_g1	TRINITY_DN17682_c0_g3	TRINITY_DN44360_c3_g1	TRINITY_DN23296_c4_g3	TRINITY_DN22041_c6_g1	TRINITY_DN19166_c3_g2	TRINITY_DN19681_c2_g5		TRINITY_DN19887_c5_g4
OG0000697	NA	NA	DW	NA	NA	NA	NA	NA	NA	8	1	0	1	1	OG0000697	TRINITY_DN10159_c15_g1	TRINITY_DN11816_c0_g2	TRINITY_DN40003_c0_g1	TRINITY_DN25291_c0_g1	TRINITY_DN8604_c0_g1	TRINITY_DN18394_c1_g1	TRINITY_DN28661_c0_g1	TRINITY_DN44842_c1_g1	TRINITY_DN18770_c5_g3
OG0000735	NA	NA	DW	NA	NA	NA	NA	NA	NA	8	1	0	1	1	OG0000735	TRINITY_DN172_c7_g1	TRINITY_DN19620_c5_g1	TRINITY_DN47786_c1_g1	TRINITY_DN22921_c12_g2	TRINITY_DN18338_c9_g3	TRINITY_DN18767_c4_g1	TRINITY_DN18190_c4_g3	TRINITY_DN1414_c0_g2	TRINITY_DN21469_c2_g3
OG0000737	DW	NA	NA	NA	NA	NA	NA	NA	NA	8	1	0	1	1	OG0000737	TRINITY_DN176_c7_g1	TRINITY_DN19497_c4_g1	TRINITY_DN44984_c7_g1	TRINITY_DN21769_c6_g4	TRINITY_DN22246_c7_g3	TRINITY_DN19555_c3_g1	TRINITY_DN20176_c4_g2	TRINITY_DN1567_c1_g1	TRINITY_DN21821_c9_g2
OG0000738	NA	NA	NA	UP	NA	NA	NA	NA	NA	8	0	1	1	1	OG0000738	TRINITY_DN1830_c3_g2	TRINITY_DN19115_c2_g2	TRINITY_DN43977_c0_g1	TRINITY_DN21815_c6_g5	TRINITY_DN24419_c3_g1	TRINITY_DN20857_c4_g1	TRINITY_DN19926_c3_g2	TRINITY_DN7186_c0_g1	TRINITY_DN22527_c12_g1
OG0000742	NA	NA	UP	NA	NA	NA	NA	NA	NA	8	0	1	1	1	OG0000742	TRINITY_DN20345_c3_g1	TRINITY_DN19787_c6_g1	TRINITY_DN70310_c0_g1	TRINITY_DN21598_c5_g2	TRINITY_DN19224_c4_g1	TRINITY_DN19042_c1_g1	TRINITY_DN15768_c0_g1	TRINITY_DN1023_c0_g1	TRINITY_DN20629_c3_g1
OG0000744	NA	NA	NA	NA	NA	NA	NA	DW	NA	8	1	0	1	1	OG0000744	TRINITY_DN20896_c2_g1	TRINITY_DN19016_c8_g1	TRINITY_DN38391_c0_g1	TRINITY_DN1341_c0_g1	TRINITY_DN23014_c1_g4	TRINITY_DN15145_c10_g1	TRINITY_DN27888_c0_g1
OG0000748	NA	NA	NA	NA	NA	NA	NA	DW	NA	8	1	0	1	1	OG0000748	TRINITY_DN21932_c2_g3	TRINITY_DN17802_c4_g4	TRINITY_DN45143_c6_g1		TRINITY_DN20397_c3_g2	TRINITY_DN20818_c7_g1	TRINITY_DN20831_c2_g6		TRINITY_DN22345_c6_g2
OG0000752	NA	NA	NA	NA	UP	NA	NA	NA	NA	8	0	1	1	1	OG0000752	TRINITY_DN232_c0_g2	TRINITY_DN19009_c5_g4	TRINITY_DN48702_c0_g3	TRINITY_DN24588_c5_g1	TRINITY_DN23494_c5_g2	TRINITY_DN19234_c9_g1	TRINITY_DN18654_c5_g1	TRINITY_DN1565_c0_g1	TRINITY_DN19673_c5_g4
OG0000753	NA	NA	NA	UP	NA	NA	NA	NA	NA	8	0	1	1	1	OG0000753	TRINITY_DN24627_c15_g1	TRINITY_DN19660_c2_g1	TRINITY_DN25205_c0_g1	TRINITY_DN47201_c0_g1	TRINITY_DN1816_c0_g1	TRINITY_DN13442_c3_g2	TRINITY_DN10175_c0_g1	TRINITY_DN21428_c4_g1	TRINITY_DN21434_c2_g2
OG0000756	NA	NA	NA	NA	NA	NA	NA	NA	UP	8	0	1	1	1	OG0000756	TRINITY_DN25010_c1_g1	TRINITY_DN17303_c1_g1	TRINITY_DN47078_c1_g1	TRINITY_DN29115_c0_g1	TRINITY_DN20380_c2_g3	TRINITY_DN13522_c3_g5	TRINITY_DN18271_c6_g1	TRINITY_DN19695_c0_g1	TRINITY_DN21790_c7_g1
OG0000765	NA	NA	DW	NA	NA	NA	NA	NA	NA	8	1	0	1	1	OG0000765	TRINITY_DN29252_c5_g1	TRINITY_DN15904_c0_g1	TRINITY_DN80887_c0_g1	TRINITY_DN20338_c0_g1		TRINITY_DN12241_c0_g1	TRINITY_DN17028_c0_g2	TRINITY_DN30303_c2_g1	TRINITY_DN19357_c0_g1
OG0000770	NA	NA	NA	UP	NA	NA	NA	NA	NA	8	0	1	1	1	OG0000770	TRINITY_DN33464_c1_g1	TRINITY_DN17415_c3_g2	TRINITY_DN59505_c0_g1	TRINITY_DN43343_c0_g1	TRINITY_DN2776_c0_g2	TRINITY_DN15681_c3_g2	TRINITY_DN658_c0_g1	TRINITY_DN2531_c1_g3	TRINITY_DN18263_c3_g2
OG0000777	NA	NA	UP	NA	NA	NA	NA	NA	NA	8	0	1	1	1	OG0000777	TRINITY_DN3706_c0_g2	TRINITY_DN18217_c3_g1	TRINITY_DN45112_c0_g2	TRINITY_DN22974_c11_g2	TRINITY_DN18434_c5_g2		TRINITY_DN18685_c3_g2	TRINITY_DN1823_c0_g1	TRINITY_DN23447_c0_g1
OG0000786	NA	NA	NA	NA	NA	NA	NA	NA	DW	8	1	0	1	1	OG0000786	TRINITY_DN45731_c1_g1	TRINITY_DN46295_c0_g1	TRINITY_DN95189_c0_g1	TRINITY_DN27343_c0_g1	TRINITY_DN35006_c0_g1	TRINITY_DN13677_c8_g4	TRINITY_DN19904_c3_g2	TRINITY_DN3425_c0_g3	TRINITY_DN21241_c7_g2
OG0000792	NA	NA	NA	NA	NA	NA	NA	DW	NA	8	1	0	1	1	OG0000792	TRINITY_DN4954_c4_g1		TRINITY_DN42511_c2_g1	TRINITY_DN24499_c6_g4	TRINITY_DN15649_c0_g2	TRINITY_DN15724_c3_g1	TRINITY_DN18852_c8_g2		TRINITY_DN23845_c1_g1
OG0000810	NA	NA	NA	DW	NA	NA	NA	NA	NA	8	1	0	1	1	OG0000810	TRINITY_DN6492_c4_g1	TRINITY_DN37804_c0_g1	TRINITY_DN28562_c0_g1	TRINITY_DN8114_c0_g1	TRINITY_DN23131_c8_g1	TRINITY_DN4842_c0_g1	TRINITY_DN36219_c0_g1	TRINITY_DN5768_c0_g1	TRINITY_DN22636_c6_g1
OG0000817	NA	NA	DW	NA	NA	NA	NA	NA	NA	8	1	0	1	1	OG0000817	TRINITY_DN7630_c2_g1	TRINITY_DN17766_c5_g3	TRINITY_DN47429_c1_g1	TRINITY_DN21548_c0_g1	TRINITY_DN19025_c4_g1	TRINITY_DN19902_c2_g2	TRINITY_DN34515_c0_g1	TRINITY_DN8408_c0_g2	TRINITY_DN18143_c0_g2
OG0000834	NA	NA	NA	NA	NA	NA	NA	DW	NA	8	1	0	1	1	OG0000834		TRINITY_DN12769_c0_g1	TRINITY_DN64032_c0_g1	TRINITY_DN44128_c0_g1	TRINITY_DN3991_c0_g1	TRINITY_DN17504_c0_g1	TRINITY_DN16683_c0_g1		TRINITY_DN21628_c4_g1
OG0000835	NA	NA	DW	NA	NA	NA	NA	NA	NA	8	1	0	1	1	OG0000835		TRINITY_DN14854_c0_g2	TRINITY_DN37167_c0_g2	TRINITY_DN18826_c0_g1	TRINITY_DN17140_c0_g1	TRINITY_DN15294_c8_g1	TRINITY_DN16648_c0_g2	TRINITY_DN9543_c2_g1	TRINITY_DN20246_c5_g2
OG0000838	NA	NA	NA	NA	NA	NA	NA	DW	NA	8	1	0	1	1	OG0000838		TRINITY_DN16411_c3_g4	TRINITY_DN48587_c2_g2	TRINITY_DN24645_c6_g1	TRINITY_DN24977_c8_g3	TRINITY_DN14245_c9_g3	TRINITY_DN20632_c6_g1		TRINITY_DN21310_c7_g3
OG0000840	NA	NA	DW	NA	NA	NA	NA	NA	NA	8	1	0	1	1	OG0000840		TRINITY_DN17267_c11_g1	TRINITY_DN46703_c0_g2	TRINITY_DN21888_c4_g2	TRINITY_DN24804_c7_g1	TRINITY_DN19404_c5_g1		TRINITY_DN5529_c0_g2	TRINITY_DN21050_c7_g1
OG0000850	NA	NA	NA	NA	NA	NA	NA	DW	NA	8	1	0	1	1	OG0000850		TRINITY_DN19824_c11_g1	TRINITY_DN48115_c6_g1	TRINITY_DN22373_c6_g1	TRINITY_DN22830_c4_g4	TRINITY_DN12620_c6_g2	TRINITY_DN21052_c10_g2		TRINITY_DN23066_c4_g1
OG0000853	NA	NA	UP	NA	NA	NA	NA	NA	NA	8	0	1	1	1	OG0000853		TRINITY_DN36681_c0_g1	TRINITY_DN84830_c0_g1	TRINITY_DN24480_c4_g5	TRINITY_DN18991_c6_g2	TRINITY_DN15395_c2_g1	TRINITY_DN11589_c0_g1	TRINITY_DN34070_c4_g1	TRINITY_DN21072_c4_g5
OG0000857	NA	NA	UP	NA	NA	NA	NA	NA	NA	8	0	1	1	1	OG0000857	TRINITY_DN10039_c9_g1		TRINITY_DN33135_c0_g1	TRINITY_DN24174_c8_g3	TRINITY_DN22902_c7_g4	TRINITY_DN18096_c8_g1	TRINITY_DN14319_c0_g2	TRINITY_DN11444_c0_g1	TRINITY_DN19516_c6_g1
OG0000858	NA	NA	NA	NA	NA	NA	NA	NA	UP	8	0	1	1	1	OG0000858	TRINITY_DN100_c0_g2	TRINITY_DN19127_c4_g2	TRINITY_DN48582_c2_g2	TRINITY_DN22173_c4_g3	TRINITY_DN24880_c0_g1	TRINITY_DN17078_c4_g1	TRINITY_DN21120_c3_g2	TRINITY_DN1872_c0_g1	TRINITY_DN23455_c7_g2
OG0000865	NA	DW	NA	NA	NA	NA	NA	NA	NA	8	1	0	1	1	OG0000865	TRINITY_DN10450_c9_g1	TRINITY_DN39772_c0_g1	TRINITY_DN78749_c0_g1	TRINITY_DN12206_c0_g2	TRINITY_DN44375_c0_g1	TRINITY_DN10992_c0_g2	TRINITY_DN30964_c0_g1	TRINITY_DN2010_c0_g2	TRINITY_DN19758_c12_g1
OG0000866	NA	NA	NA	NA	NA	NA	NA	DW	NA	8	1	0	1	1	OG0000866	TRINITY_DN46_c4_g1	TRINITY_DN16693_c3_g1	TRINITY_DN46201_c8_g1	TRINITY_DN23603_c3_g2	TRINITY_DN20566_c8_g2	TRINITY_DN20957_c2_g2	TRINITY_DN21269_c6_g1		TRINITY_DN19192_c5_g1
OG0000874	NA	NA	DW	NA	NA	NA	NA	NA	NA	8	1	0	1	1	OG0000874	TRINITY_DN11553_c3_g1	TRINITY_DN18663_c5_g2	TRINITY_DN40853_c1_g1	TRINITY_DN7764_c0_g1	TRINITY_DN20212_c2_g1	TRINITY_DN20246_c4_g1	TRINITY_DN46023_c0_g1	TRINITY_DN8197_c0_g1	TRINITY_DN19193_c0_g1
OG0000875	NA	NA	NA	NA	NA	NA	NA	DW	NA	8	1	0	1	1	OG0000875	TRINITY_DN1164_c0_g1	TRINITY_DN19148_c1_g1	TRINITY_DN45626_c0_g1	TRINITY_DN24624_c6_g1	TRINITY_DN21721_c4_g1	TRINITY_DN15044_c3_g2	TRINITY_DN19311_c11_g2		TRINITY_DN21618_c5_g1
OG0000877	NA	NA	NA	NA	NA	NA	NA	DW	NA	8	1	0	1	1	OG0000877	TRINITY_DN11833_c7_g1	TRINITY_DN32891_c0_g1	TRINITY_DN49096_c0_g1	TRINITY_DN19849_c0_g4		TRINITY_DN8824_c0_g1	TRINITY_DN5756_c0_g1		TRINITY_DN12896_c0_g1
OG0000878	NA	NA	DW	NA	NA	NA	NA	NA	NA	8	1	0	1	1	OG0000878	TRINITY_DN121_c0_g2	TRINITY_DN19304_c9_g1	TRINITY_DN36827_c0_g1	TRINITY_DN24030_c2_g1	TRINITY_DN23615_c3_g2	TRINITY_DN18999_c7_g1	TRINITY_DN20385_c4_g2	TRINITY_DN3650_c2_g1	TRINITY_DN21961_c5_g1
OG0000880	NA	NA	DW	NA	NA	NA	NA	NA	NA	8	1	0	1	1	OG0000880	TRINITY_DN1226_c0_g1	TRINITY_DN16993_c3_g1	TRINITY_DN63674_c0_g1	TRINITY_DN22972_c9_g1	TRINITY_DN22415_c0_g1	TRINITY_DN17625_c6_g1	TRINITY_DN18214_c7_g1	TRINITY_DN699_c0_g4	TRINITY_DN19468_c9_g1
OG0000888	NA	NA	DW	NA	NA	NA	NA	NA	NA	8	1	0	1	1	OG0000888	TRINITY_DN14298_c2_g1	TRINITY_DN6732_c0_g1	TRINITY_DN4510_c0_g1	TRINITY_DN38737_c0_g1	TRINITY_DN11321_c0_g2	TRINITY_DN19790_c8_g3	TRINITY_DN35228_c0_g1	TRINITY_DN8156_c1_g2
OG0000889	NA	NA	UP	NA	NA	NA	NA	NA	NA	8	0	1	1	1	OG0000889	TRINITY_DN14303_c2_g1	TRINITY_DN17403_c1_g1	TRINITY_DN96733_c0_g1	TRINITY_DN18012_c0_g1	TRINITY_DN20851_c5_g4	TRINITY_DN11768_c0_g1	TRINITY_DN46394_c0_g1	TRINITY_DN4150_c1_g3	TRINITY_DN21120_c4_g2
OG0000893	NA	NA	NA	NA	NA	NA	NA	NA	DW	8	1	0	1	1	OG0000893	TRINITY_DN1479_c1_g1	TRINITY_DN15480_c0_g1	TRINITY_DN43364_c0_g1	TRINITY_DN23035_c3_g1	TRINITY_DN21420_c1_g1	TRINITY_DN18509_c2_g1	TRINITY_DN16267_c0_g2	TRINITY_DN6150_c0_g1	TRINITY_DN18743_c1_g1
OG0000898	NA	NA	DW	NA	NA	NA	NA	NA	NA	8	1	0	1	1	OG0000898	TRINITY_DN1583_c0_g1	TRINITY_DN19442_c5_g1	TRINITY_DN45541_c3_g3	TRINITY_DN23095_c3_g2	TRINITY_DN22758_c4_g3	TRINITY_DN13469_c1_g1	TRINITY_DN20541_c7_g1	TRINITY_DN2379_c12_g1	TRINITY_DN18399_c4_g2
OG0000902	NA	NA	UP	NA	NA	NA	NA	NA	NA	8	0	1	1	1	OG0000902	TRINITY_DN16660_c1_g1	TRINITY_DN18757_c0_g2	TRINITY_DN47561_c1_g4		TRINITY_DN22245_c3_g1	TRINITY_DN12864_c3_g5	TRINITY_DN18022_c3_g6	TRINITY_DN10883_c0_g1	TRINITY_DN20197_c8_g2
OG0000903	NA	NA	UP	NA	NA	NA	NA	NA	NA	8	0	1	1	1	OG0000903	TRINITY_DN1682_c0_g2	TRINITY_DN16660_c9_g1	TRINITY_DN46407_c0_g2	TRINITY_DN23321_c8_g1	TRINITY_DN22034_c0_g1	TRINITY_DN14036_c2_g1	TRINITY_DN17124_c0_g1	TRINITY_DN236_c2_g2	TRINITY_DN20682_c4_g2
OG0000904	NA	NA	DW	NA	NA	NA	NA	NA	NA	8	1	0	1	1	OG0000904	TRINITY_DN314_c0_g2	TRINITY_DN19158_c6_g1	TRINITY_DN36615_c0_g1	TRINITY_DN23883_c6_g1	TRINITY_DN23793_c1_g1	TRINITY_DN19109_c3_g2	TRINITY_DN20298_c11_g1	TRINITY_DN1163_c0_g1	TRINITY_DN20441_c4_g1
OG0000907	NA	NA	NA	NA	NA	NA	NA	NA	DW	8	1	0	1	1	OG0000907	TRINITY_DN17442_c2_g1	TRINITY_DN18434_c1_g2	TRINITY_DN45875_c0_g3	TRINITY_DN23252_c0_g2	TRINITY_DN24346_c4_g1	TRINITY_DN18813_c3_g1	TRINITY_DN18366_c4_g10	TRINITY_DN3335_c2_g2	TRINITY_DN20929_c9_g1
OG0000914	NA	NA	NA	NA	UP	NA	NA	NA	NA	8	0	1	1	1	OG0000914	TRINITY_DN18894_c2_g1	TRINITY_DN16457_c7_g4	TRINITY_DN48201_c0_g1	TRINITY_DN21004_c0_g1	TRINITY_DN23619_c0_g2	TRINITY_DN19703_c6_g1		TRINITY_DN57811_c5_g1	TRINITY_DN19415_c7_g2
OG0000916	NA	NA	DW	NA	NA	NA	NA	NA	NA	8	1	0	1	1	OG0000916	TRINITY_DN189_c0_g2	TRINITY_DN17604_c2_g1	TRINITY_DN45163_c2_g2	TRINITY_DN23325_c6_g6	TRINITY_DN19026_c6_g1	TRINITY_DN18948_c1_g3	TRINITY_DN18375_c4_g4	TRINITY_DN461_c0_g3	TRINITY_DN23924_c3_g2
OG0000919	NA	NA	DW	NA	NA	NA	NA	NA	NA	8	1	0	1	1	OG0000919	TRINITY_DN1918_c2_g1	TRINITY_DN18263_c4_g3	TRINITY_DN49911_c0_g1	TRINITY_DN24683_c8_g1		TRINITY_DN18605_c7_g1	TRINITY_DN19296_c9_g1	TRINITY_DN120_c0_g1	TRINITY_DN18534_c7_g2
OG0000921	NA	NA	NA	NA	NA	NA	NA	DW	NA	8	1	0	1	1	OG0000921	TRINITY_DN19647_c0_g2	TRINITY_DN17926_c2_g1	TRINITY_DN42127_c0_g1	TRINITY_DN20201_c0_g4	TRINITY_DN18247_c7_g9	TRINITY_DN17352_c4_g2	TRINITY_DN16592_c0_g1		TRINITY_DN21852_c8_g1
OG0000928	NA	NA	NA	NA	NA	NA	NA	DW	NA	8	1	0	1	1	OG0000928	TRINITY_DN2221_c6_g1	TRINITY_DN46373_c0_g1	TRINITY_DN82013_c0_g1	TRINITY_DN48176_c0_g1	TRINITY_DN39333_c0_g1	TRINITY_DN19545_c3_g3	TRINITY_DN47099_c0_g1		TRINITY_DN43338_c0_g1
OG0000930	NA	NA	NA	DW	NA	NA	NA	NA	NA	8	1	0	1	1	OG0000930	TRINITY_DN7223_c0_g1	TRINITY_DN16949_c3_g1	TRINITY_DN46263_c0_g1	TRINITY_DN21751_c0_g2	TRINITY_DN19893_c7_g2	TRINITY_DN17470_c5_g2	TRINITY_DN17042_c0_g1	TRINITY_DN6988_c0_g1	TRINITY_DN21047_c1_g3
OG0000933	NA	NA	DW	NA	NA	NA	NA	NA	NA	8	1	0	1	1	OG0000933	TRINITY_DN231_c0_g2	TRINITY_DN19340_c2_g1	TRINITY_DN36073_c0_g1	TRINITY_DN24804_c1_g3	TRINITY_DN23867_c5_g1	TRINITY_DN20141_c4_g1	TRINITY_DN20870_c0_g2	TRINITY_DN2873_c0_g1	TRINITY_DN23757_c7_g1
OG0000936	NA	NA	NA	NA	NA	NA	NA	NA	DW	8	1	0	1	1	OG0000936	TRINITY_DN2351_c0_g2		TRINITY_DN47095_c8_g1	TRINITY_DN22387_c6_g1	TRINITY_DN22124_c6_g1	TRINITY_DN18890_c2_g2	TRINITY_DN19889_c7_g2	TRINITY_DN1801_c0_g1	TRINITY_DN21820_c6_g1
OG0000938	NA	NA	NA	NA	NA	NA	NA	DW	NA	8	1	0	1	1	OG0000938	TRINITY_DN238_c6_g1	TRINITY_DN18327_c12_g2	TRINITY_DN45718_c8_g1	TRINITY_DN21642_c6_g2	TRINITY_DN23837_c2_g6	TRINITY_DN20117_c3_g5	TRINITY_DN17879_c1_g1		TRINITY_DN21574_c9_g1
OG0000947	NA	NA	UP	NA	NA	NA	NA	NA	NA	8	0	1	1	1	OG0000947	TRINITY_DN3622_c0_g2	TRINITY_DN459_c0_g1	TRINITY_DN72817_c0_g1	TRINITY_DN15345_c0_g1	TRINITY_DN19490_c2_g3	TRINITY_DN14684_c6_g7	TRINITY_DN17564_c2_g1	TRINITY_DN493_c0_g1	TRINITY_DN21293_c1_g3
OG0000949	NA	NA	NA	NA	NA	NA	NA	UP	NA	8	0	1	1	1	OG0000949	TRINITY_DN2736_c0_g1	TRINITY_DN17960_c10_g1	TRINITY_DN44087_c0_g1	TRINITY_DN22384_c4_g6	TRINITY_DN22211_c9_g1	TRINITY_DN19602_c0_g1	TRINITY_DN19223_c5_g2	TRINITY_DN3729_c0_g2	TRINITY_DN22139_c0_g1
OG0000951	NA	NA	DW	NA	NA	NA	NA	NA	NA	8	1	0	1	1	OG0000951	TRINITY_DN2776_c3_g2	TRINITY_DN17929_c6_g1	TRINITY_DN35935_c0_g1	TRINITY_DN21786_c4_g1	TRINITY_DN23888_c2_g3	TRINITY_DN12986_c5_g1	TRINITY_DN19683_c0_g2	TRINITY_DN2363_c0_g1	TRINITY_DN20727_c5_g5
OG0000955	NA	NA	UP	NA	NA	NA	NA	NA	NA	8	0	1	1	1	OG0000955	TRINITY_DN29282_c4_g1	TRINITY_DN28355_c0_g1	TRINITY_DN41240_c0_g1	TRINITY_DN20536_c1_g1	TRINITY_DN858_c0_g1	TRINITY_DN12392_c5_g1	TRINITY_DN17374_c0_g1	TRINITY_DN3810_c1_g2	TRINITY_DN20263_c6_g1
OG0000956	NA	NA	NA	NA	NA	NA	NA	DW	NA	8	1	0	1	1	OG0000956	TRINITY_DN29629_c3_g1	TRINITY_DN13479_c0_g1	TRINITY_DN84572_c0_g1	TRINITY_DN29143_c0_g1	TRINITY_DN28724_c0_g1	TRINITY_DN32482_c0_g1	TRINITY_DN22280_c0_g1
OG0000967	NA	NA	DW	NA	NA	NA	NA	NA	NA	8	1	0	1	1	OG0000967	TRINITY_DN33342_c11_g1	TRINITY_DN18203_c0_g1	TRINITY_DN22089_c0_g1	TRINITY_DN25803_c0_g1	TRINITY_DN18478_c3_g3	TRINITY_DN13921_c5_g1	TRINITY_DN19099_c1_g1	TRINITY_DN6393_c1_g2	TRINITY_DN19902_c4_g3
OG0000979	NA	NA	NA	NA	NA	NA	NA	DW	NA	8	1	0	1	1	OG0000979	TRINITY_DN392_c4_g1	TRINITY_DN16836_c6_g1	TRINITY_DN42767_c9_g1	TRINITY_DN24655_c8_g3	TRINITY_DN21775_c7_g2	TRINITY_DN13351_c3_g5	TRINITY_DN19370_c4_g1		TRINITY_DN18293_c6_g1
OG0000995	NA	NA	DW	NA	NA	NA	NA	NA	NA	8	1	0	1	1	OG0000995	TRINITY_DN4635_c2_g1	TRINITY_DN17345_c2_g1	TRINITY_DN93215_c0_g1	TRINITY_DN38369_c0_g1	TRINITY_DN48756_c0_g1	TRINITY_DN15127_c4_g2	TRINITY_DN20464_c2_g1	TRINITY_DN32515_c1_g1	TRINITY_DN17685_c0_g2
OG0001000	NA	NA	NA	NA	NA	NA	NA	DW	NA	8	1	0	1	1	OG0001000	TRINITY_DN478_c1_g2	TRINITY_DN19509_c7_g1	TRINITY_DN48535_c5_g2	TRINITY_DN24097_c1_g2	TRINITY_DN25145_c4_g4	TRINITY_DN17780_c5_g1	TRINITY_DN20252_c1_g1		TRINITY_DN23268_c10_g3
OG0001018	NA	DW	NA	NA	NA	NA	NA	NA	NA	8	1	0	1	1	OG0001018	TRINITY_DN6157_c0_g2	TRINITY_DN6804_c0_g1	TRINITY_DN47352_c2_g1	TRINITY_DN2040_c0_g1	TRINITY_DN11570_c0_g1	TRINITY_DN19425_c1_g1	TRINITY_DN10084_c0_g1	TRINITY_DN8293_c0_g1	TRINITY_DN16576_c0_g1
OG0001022	NA	NA	DW	NA	NA	NA	NA	NA	NA	8	1	0	1	1	OG0001022	TRINITY_DN621_c1_g2	TRINITY_DN19735_c1_g2	TRINITY_DN36423_c0_g1	TRINITY_DN24840_c1_g1	TRINITY_DN24951_c0_g1	TRINITY_DN19997_c3_g1	TRINITY_DN21088_c1_g1	TRINITY_DN492_c0_g1	TRINITY_DN23685_c1_g1
OG0001023	NA	NA	DW	NA	NA	NA	NA	NA	NA	8	1	0	1	1	OG0001023	TRINITY_DN621_c5_g1	TRINITY_DN19511_c4_g1	TRINITY_DN45005_c0_g1	TRINITY_DN24123_c7_g1	TRINITY_DN23651_c4_g1	TRINITY_DN16649_c4_g4	TRINITY_DN18547_c6_g1	TRINITY_DN4792_c0_g1	TRINITY_DN22812_c3_g1
OG0001027	NA	NA	NA	NA	UP	NA	NA	NA	NA	8	0	1	1	1	OG0001027	TRINITY_DN662_c2_g1	TRINITY_DN18499_c5_g1	TRINITY_DN48690_c0_g1	TRINITY_DN24830_c1_g1	TRINITY_DN25272_c2_g1	TRINITY_DN11515_c0_g2	TRINITY_DN19404_c5_g1	TRINITY_DN12480_c0_g1	TRINITY_DN18984_c4_g1
OG0001028	NA	NA	NA	NA	NA	NA	NA	NA	DW	8	1	0	1	1	OG0001028	TRINITY_DN666_c0_g1	TRINITY_DN15755_c0_g1	TRINITY_DN41569_c0_g1	TRINITY_DN21267_c0_g5	TRINITY_DN18607_c0_g1	TRINITY_DN19783_c5_g1	TRINITY_DN19049_c0_g7	TRINITY_DN23680_c0_g1	TRINITY_DN20843_c4_g1
OG0001030	NA	NA	DW	NA	NA	NA	NA	NA	NA	8	1	0	1	1	OG0001030	TRINITY_DN706_c0_g1	TRINITY_DN17268_c5_g1	TRINITY_DN35355_c0_g1	TRINITY_DN24509_c2_g1	TRINITY_DN23883_c6_g1	TRINITY_DN21333_c4_g1	TRINITY_DN20766_c5_g1	TRINITY_DN886_c0_g1	TRINITY_DN21074_c3_g1
OG0001031	NA	NA	NA	NA	NA	NA	NA	DW	NA	8	1	0	1	1	OG0001031	TRINITY_DN706_c0_g2	TRINITY_DN17574_c2_g2	TRINITY_DN45073_c5_g2	TRINITY_DN24462_c2_g1	TRINITY_DN23408_c0_g1	TRINITY_DN17956_c5_g1	TRINITY_DN20727_c5_g2		TRINITY_DN23881_c7_g1
OG0001036	NA	NA	UP	NA	NA	NA	NA	NA	NA	8	0	1	1	1	OG0001036	TRINITY_DN7631_c0_g1	TRINITY_DN17657_c8_g5	TRINITY_DN43769_c6_g2	TRINITY_DN23014_c3_g3	TRINITY_DN20467_c1_g2	TRINITY_DN16614_c10_g2	TRINITY_DN20962_c6_g1	TRINITY_DN6263_c1_g1	TRINITY_DN22357_c3_g2
OG0001040	NA	NA	DW	NA	NA	NA	NA	NA	NA	8	1	0	1	1	OG0001040	TRINITY_DN794_c2_g1	TRINITY_DN17455_c6_g1	TRINITY_DN40820_c0_g1		TRINITY_DN20359_c5_g1	TRINITY_DN16871_c6_g1	TRINITY_DN21380_c4_g3	TRINITY_DN2448_c0_g2	TRINITY_DN23907_c4_g1
OG0001046	NA	NA	UP	NA	NA	NA	NA	NA	NA	8	0	1	1	1	OG0001046	TRINITY_DN851_c3_g3	TRINITY_DN16663_c9_g1	TRINITY_DN40662_c1_g1	TRINITY_DN24567_c1_g2	TRINITY_DN19387_c2_g2	TRINITY_DN17789_c0_g1	TRINITY_DN19932_c9_g1	TRINITY_DN152_c4_g2	TRINITY_DN23815_c6_g1
OG0001050	NA	NA	NA	NA	NA	NA	NA	UP	NA	8	0	1	1	1	OG0001050	TRINITY_DN889_c4_g1	TRINITY_DN16966_c5_g1	TRINITY_DN47849_c4_g1	TRINITY_DN24088_c4_g3	TRINITY_DN18490_c13_g1	TRINITY_DN19650_c4_g1	TRINITY_DN20702_c2_g2	TRINITY_DN1184_c2_g1	TRINITY_DN20979_c2_g1
OG0001056	NA	NA	UP	NA	NA	NA	NA	NA	NA	8	0	1	1	1	OG0001056	TRINITY_DN9846_c1_g1	TRINITY_DN17490_c6_g5	TRINITY_DN27354_c0_g1	TRINITY_DN17843_c0_g1	TRINITY_DN22733_c7_g1	TRINITY_DN16393_c0_g1	TRINITY_DN21265_c2_g1	TRINITY_DN601_c0_g3	TRINITY_DN31860_c0_g1
OG0001057	NA	NA	DW	NA	NA	NA	NA	NA	NA	8	1	0	1	1	OG0001057		TRINITY_DN11945_c0_g2	TRINITY_DN57932_c0_g1	TRINITY_DN32317_c0_g1	TRINITY_DN33819_c0_g1	TRINITY_DN32141_c0_g1	TRINITY_DN44224_c0_g1	TRINITY_DN50942_c0_g1
OG0001059	NA	NA	UP	NA	NA	NA	NA	NA	NA	8	0	1	1	1	OG0001059		TRINITY_DN13372_c0_g1	TRINITY_DN23440_c1_g1		TRINITY_DN22884_c7_g1	TRINITY_DN20199_c4_g1	TRINITY_DN21020_c1_g9	TRINITY_DN4681_c2_g2	TRINITY_DN19580_c5_g1
OG0001067	NA	NA	NA	NA	NA	NA	NA	DW	NA	8	1	0	1	1	OG0001067		TRINITY_DN23440_c0_g1	TRINITY_DN39507_c0_g1	TRINITY_DN59056_c0_g1	TRINITY_DN15413_c0_g1	TRINITY_DN18631_c3_g3	TRINITY_DN9750_c0_g1		TRINITY_DN17422_c0_g2
OG0001071	NA	NA	UP	NA	NA	NA	NA	NA	NA	8	0	1	1	1	OG0001071		TRINITY_DN18731_c7_g2	TRINITY_DN36509_c0_g1	TRINITY_DN24759_c8_g1	TRINITY_DN23707_c2_g1	TRINITY_DN15345_c1_g1	TRINITY_DN21231_c4_g3	TRINITY_DN1564_c1_g3	TRINITY_DN20742_c8_g2
OG0001080	NA	NA	NA	NA	DW	NA	NA	NA	NA	8	1	0	1	1	OG0001080		TRINITY_DN28738_c0_g1	TRINITY_DN25900_c0_g1	TRINITY_DN49363_c0_g1	TRINITY_DN27519_c0_g1	TRINITY_DN3217_c0_g2	TRINITY_DN17866_c9_g4	TRINITY_DN29741_c0_g1	TRINITY_DN26297_c0_g1
OG0001089	NA	NA	NA	NA	UP	NA	NA	NA	NA	8	0	1	1	1	OG0001089	TRINITY_DN10003_c1_g1	TRINITY_DN30545_c0_g1	TRINITY_DN45675_c3_g1	TRINITY_DN24012_c14_g4	TRINITY_DN22888_c1_g6		TRINITY_DN17855_c0_g2	TRINITY_DN11790_c1_g1	TRINITY_DN20004_c2_g1
OG0001091	NA	NA	UP	NA	NA	NA	NA	NA	NA	8	0	1	1	1	OG0001091	TRINITY_DN10233_c2_g2	TRINITY_DN16393_c4_g3	TRINITY_DN13423_c0_g1	TRINITY_DN23333_c3_g1	TRINITY_DN23526_c1_g2	TRINITY_DN16911_c4_g1	TRINITY_DN19148_c1_g1	TRINITY_DN2896_c1_g2	TRINITY_DN18979_c3_g1
OG0001095	NA	NA	NA	NA	NA	NA	NA	UP	NA	8	0	1	1	1	OG0001095	TRINITY_DN10740_c0_g1	TRINITY_DN16797_c7_g3	TRINITY_DN44612_c6_g1	TRINITY_DN22416_c4_g2	TRINITY_DN19366_c6_g1	TRINITY_DN19284_c12_g1	TRINITY_DN20496_c7_g7	TRINITY_DN30994_c0_g2	TRINITY_DN19609_c7_g1
OG0001096	NA	NA	DW	NA	NA	NA	NA	NA	NA	8	1	0	1	1	OG0001096	TRINITY_DN10776_c0_g2		TRINITY_DN46235_c3_g2	TRINITY_DN24587_c13_g2	TRINITY_DN23539_c1_g2	TRINITY_DN19527_c0_g1	TRINITY_DN20900_c5_g1	TRINITY_DN17_c0_g2	TRINITY_DN21764_c5_g1
OG0001102	NA	NA	NA	NA	UP	NA	NA	NA	NA	8	0	1	1	1	OG0001102	TRINITY_DN11549_c0_g1	TRINITY_DN19794_c9_g1	TRINITY_DN44038_c1_g1	TRINITY_DN20751_c0_g2	TRINITY_DN19712_c8_g1	TRINITY_DN18050_c5_g2	TRINITY_DN18102_c7_g1	TRINITY_DN55521_c0_g1	TRINITY_DN23702_c8_g1
OG0001104	NA	NA	NA	NA	NA	NA	NA	DW	NA	8	1	0	1	1	OG0001104	TRINITY_DN11600_c1_g1	TRINITY_DN17144_c10_g4	TRINITY_DN19639_c0_g1	TRINITY_DN24234_c8_g3	TRINITY_DN45637_c0_g1	TRINITY_DN12386_c5_g1	TRINITY_DN20970_c5_g3		TRINITY_DN19780_c4_g1
OG0001105	NA	NA	UP	NA	NA	NA	NA	NA	NA	8	0	1	1	1	OG0001105	TRINITY_DN11685_c16_g1	TRINITY_DN13737_c0_g2	TRINITY_DN83009_c0_g1	TRINITY_DN47849_c0_g1	TRINITY_DN11946_c0_g2	TRINITY_DN20882_c6_g3	TRINITY_DN34199_c0_g1	TRINITY_DN15500_c5_g1	TRINITY_DN18192_c11_g2
OG0001114	NA	NA	NA	NA	UP	NA	NA	NA	NA	8	0	1	1	1	OG0001114	TRINITY_DN1282_c0_g2	TRINITY_DN18003_c4_g1	TRINITY_DN42793_c0_g1		TRINITY_DN18480_c8_g1	TRINITY_DN16542_c8_g1	TRINITY_DN19175_c3_g2	TRINITY_DN1129_c0_g1	TRINITY_DN22112_c4_g2
OG0001125	NA	NA	DW	NA	NA	NA	NA	NA	NA	8	1	0	1	1	OG0001125	TRINITY_DN13970_c3_g1	TRINITY_DN17649_c11_g5	TRINITY_DN39579_c0_g1	TRINITY_DN14040_c0_g1	TRINITY_DN22719_c10_g1	TRINITY_DN20319_c8_g3		TRINITY_DN40626_c3_g1	TRINITY_DN19484_c6_g1
OG0001130	NA	NA	DW	NA	NA	NA	NA	NA	NA	8	1	0	1	1	OG0001130	TRINITY_DN14774_c0_g2	TRINITY_DN13557_c0_g3	TRINITY_DN46270_c2_g4	TRINITY_DN22740_c6_g1	TRINITY_DN19951_c0_g1	TRINITY_DN14688_c0_g1	TRINITY_DN15205_c0_g3	TRINITY_DN3317_c0_g3	TRINITY_DN21715_c2_g3
OG0001131	NA	NA	NA	NA	NA	NA	NA	DW	NA	8	1	0	1	1	OG0001131	TRINITY_DN1546_c0_g2	TRINITY_DN18275_c8_g1	TRINITY_DN43197_c6_g2	TRINITY_DN24846_c10_g1	TRINITY_DN24098_c4_g1	TRINITY_DN12369_c8_g3	TRINITY_DN20691_c9_g1		TRINITY_DN22723_c1_g1
OG0001135	NA	NA	NA	NA	NA	NA	NA	NA	DW	8	1	0	1	1	OG0001135	TRINITY_DN1597_c1_g1	TRINITY_DN18732_c9_g2	TRINITY_DN45284_c4_g1	TRINITY_DN23008_c7_g1	TRINITY_DN23449_c11_g1	TRINITY_DN20910_c7_g1	TRINITY_DN17894_c6_g4	TRINITY_DN1491_c0_g4	TRINITY_DN18730_c13_g1
OG0001136	NA	NA	UP	NA	NA	NA	NA	NA	NA	8	0	1	1	1	OG0001136	TRINITY_DN16037_c5_g2	TRINITY_DN17364_c2_g3	TRINITY_DN38620_c0_g1	TRINITY_DN23029_c2_g1	TRINITY_DN22557_c9_g1		TRINITY_DN18225_c5_g2	TRINITY_DN2678_c1_g2	TRINITY_DN21295_c2_g1
OG0001138	NA	NA	NA	NA	NA	NA	NA	DW	NA	8	1	0	1	1	OG0001138	TRINITY_DN1613_c2_g1	TRINITY_DN16625_c2_g1	TRINITY_DN45523_c1_g1	TRINITY_DN23256_c5_g2	TRINITY_DN23217_c5_g4	TRINITY_DN15164_c4_g1	TRINITY_DN19386_c4_g1		TRINITY_DN19786_c6_g1
OG0001144	NA	NA	NA	NA	NA	NA	NA	DW	NA	8	1	0	1	1	OG0001144	TRINITY_DN16957_c1_g1	TRINITY_DN19313_c5_g2	TRINITY_DN42100_c2_g4	TRINITY_DN24534_c4_g5	TRINITY_DN24682_c10_g1	TRINITY_DN21196_c12_g1	TRINITY_DN19801_c4_g1		TRINITY_DN21403_c10_g1
OG0001146	NA	NA	UP	NA	NA	NA	NA	NA	NA	8	0	1	1	1	OG0001146	TRINITY_DN17159_c1_g1	TRINITY_DN16326_c2_g3	TRINITY_DN44436_c1_g1	TRINITY_DN20009_c0_g1	TRINITY_DN5070_c0_g1	TRINITY_DN20560_c10_g1	TRINITY_DN38970_c0_g1	TRINITY_DN9832_c0_g1	TRINITY_DN18201_c9_g1
OG0001152	NA	NA	UP	NA	NA	NA	NA	NA	NA	8	0	1	1	1	OG0001152	TRINITY_DN18207_c1_g1	TRINITY_DN16533_c9_g1	TRINITY_DN34013_c0_g1	TRINITY_DN20674_c0_g1	TRINITY_DN24764_c4_g1	TRINITY_DN17871_c3_g1	TRINITY_DN16603_c0_g1	TRINITY_DN10370_c0_g1	TRINITY_DN21010_c4_g1
OG0001157	NA	NA	NA	NA	NA	NA	NA	DW	NA	8	1	0	1	1	OG0001157	TRINITY_DN19113_c1_g1	TRINITY_DN15253_c0_g1	TRINITY_DN72584_c0_g1	TRINITY_DN57542_c0_g1	TRINITY_DN16452_c1_g1	TRINITY_DN18988_c6_g1	TRINITY_DN5407_c0_g1		TRINITY_DN19788_c8_g2
OG0001160	NA	NA	UP	NA	NA	NA	NA	NA	NA	8	0	1	1	1	OG0001160	TRINITY_DN1954_c0_g2	TRINITY_DN16183_c0_g1	TRINITY_DN42301_c0_g2	TRINITY_DN21401_c0_g1	TRINITY_DN18885_c0_g1	TRINITY_DN13062_c4_g2	TRINITY_DN18367_c7_g2	TRINITY_DN393_c2_g1	TRINITY_DN20777_c5_g1
OG0001171	NA	NA	NA	NA	NA	NA	NA	UP	NA	8	0	1	1	1	OG0001171	TRINITY_DN20969_c1_g2	TRINITY_DN17822_c5_g2		TRINITY_DN23516_c7_g1	TRINITY_DN19112_c4_g1	TRINITY_DN18567_c7_g1	TRINITY_DN20225_c3_g3	TRINITY_DN16371_c0_g1	TRINITY_DN23819_c2_g4
OG0001173	NA	NA	UP	NA	NA	NA	NA	NA	NA	8	0	1	1	1	OG0001173	TRINITY_DN21081_c0_g2	TRINITY_DN6833_c0_g1	TRINITY_DN37403_c0_g1	TRINITY_DN24688_c4_g1	TRINITY_DN36246_c0_g1	TRINITY_DN20185_c2_g1	TRINITY_DN20733_c3_g1	TRINITY_DN1252_c1_g2	TRINITY_DN21192_c6_g1
OG0001181	NA	NA	NA	NA	UP	NA	NA	NA	NA	8	0	1	1	1	OG0001181	TRINITY_DN22172_c5_g1	TRINITY_DN8880_c0_g1	TRINITY_DN38984_c0_g1	TRINITY_DN5237_c0_g2	TRINITY_DN36676_c0_g1	TRINITY_DN8233_c0_g1	TRINITY_DN13179_c0_g2	TRINITY_DN14449_c0_g1	TRINITY_DN21506_c3_g2
OG0001185	NA	NA	NA	NA	NA	NA	DW	NA	NA	8	1	0	1	1	OG0001185	TRINITY_DN23183_c1_g1	TRINITY_DN40723_c0_g1	TRINITY_DN31137_c0_g3	TRINITY_DN14837_c0_g3	TRINITY_DN18372_c1_g4		TRINITY_DN20031_c3_g1	TRINITY_DN6433_c0_g1	TRINITY_DN18443_c9_g5
OG0001186	NA	NA	UP	NA	NA	NA	NA	NA	NA	8	0	1	1	1	OG0001186	TRINITY_DN2323_c1_g1	TRINITY_DN18942_c2_g1	TRINITY_DN47287_c0_g4	TRINITY_DN21151_c0_g1	TRINITY_DN21169_c14_g2	TRINITY_DN19520_c1_g2	TRINITY_DN19911_c0_g4	TRINITY_DN1123_c1_g2	TRINITY_DN22398_c2_g1
OG0001192	NA	NA	NA	NA	NA	NA	NA	NA	DW	8	1	0	1	1	OG0001192	TRINITY_DN239_c4_g1	TRINITY_DN18665_c6_g1	TRINITY_DN46776_c0_g1	TRINITY_DN23395_c0_g1	TRINITY_DN24345_c4_g2	TRINITY_DN19267_c2_g1	TRINITY_DN20872_c7_g1	TRINITY_DN348_c0_g1	TRINITY_DN23368_c2_g1
OG0001193	NA	NA	NA	NA	UP	NA	NA	NA	NA	8	0	1	1	1	OG0001193	TRINITY_DN8892_c1_g1		TRINITY_DN47984_c0_g1	TRINITY_DN21811_c4_g2	TRINITY_DN20497_c5_g1		TRINITY_DN17559_c5_g1	TRINITY_DN78_c0_g2	TRINITY_DN63187_c0_g1
OG0001203	NA	NA	UP	NA	NA	NA	NA	NA	NA	8	0	1	1	1	OG0001203	TRINITY_DN26939_c1_g1	TRINITY_DN15184_c0_g4	TRINITY_DN43977_c0_g2		TRINITY_DN18899_c1_g1	TRINITY_DN11973_c0_g1	TRINITY_DN21509_c0_g1	TRINITY_DN22210_c1_g1	TRINITY_DN20449_c4_g1
OG0001204	NA	NA	NA	NA	DW	NA	NA	NA	NA	8	1	0	1	1	OG0001204	TRINITY_DN2708_c2_g2	TRINITY_DN15844_c0_g1	TRINITY_DN48209_c2_g2	TRINITY_DN22582_c7_g1	TRINITY_DN22075_c7_g6	TRINITY_DN14487_c7_g3	TRINITY_DN44222_c0_g1	TRINITY_DN8055_c0_g1	TRINITY_DN23472_c8_g1
OG0001210	NA	NA	NA	NA	NA	NA	NA	UP	NA	8	0	1	1	1	OG0001210	TRINITY_DN278_c2_g6	TRINITY_DN18917_c2_g4	TRINITY_DN47409_c6_g1	TRINITY_DN22938_c8_g1	TRINITY_DN23097_c2_g1	TRINITY_DN16998_c4_g1	TRINITY_DN19595_c2_g2	TRINITY_DN31_c5_g1	TRINITY_DN20819_c4_g1
OG0001215	NA	NA	NA	NA	NA	NA	NA	DW	NA	8	1	0	1	1	OG0001215	TRINITY_DN28515_c1_g1	TRINITY_DN14836_c0_g1	TRINITY_DN26634_c0_g1	TRINITY_DN56984_c0_g1	TRINITY_DN19857_c4_g1	TRINITY_DN20269_c7_g5	TRINITY_DN21168_c2_g11	TRINITY_DN5396_c0_g1	TRINITY_DN21924_c9_g1
OG0001216	NA	NA	NA	NA	UP	NA	NA	NA	NA	8	0	1	1	1	OG0001216	TRINITY_DN2865_c0_g2	TRINITY_DN18810_c3_g10	TRINITY_DN44650_c4_g1	TRINITY_DN22361_c11_g1	TRINITY_DN20669_c2_g1	TRINITY_DN17708_c5_g1	TRINITY_DN20117_c8_g1	TRINITY_DN50611_c0_g1	TRINITY_DN21480_c6_g1
OG0001221	NA	NA	UP	NA	NA	NA	NA	NA	NA	8	0	1	1	1	OG0001221	TRINITY_DN30091_c0_g1	TRINITY_DN13559_c0_g1	TRINITY_DN2872_c0_g1	TRINITY_DN24595_c0_g7	TRINITY_DN20124_c4_g1		TRINITY_DN21033_c5_g3	TRINITY_DN1965_c1_g2	TRINITY_DN20664_c5_g1
OG0001222	NA	NA	NA	NA	NA	NA	NA	NA	UP	8	0	1	1	1	OG0001222	TRINITY_DN3078_c1_g2	TRINITY_DN15770_c0_g1	TRINITY_DN45281_c1_g1	TRINITY_DN23535_c5_g2	TRINITY_DN18331_c8_g1	TRINITY_DN15281_c4_g1	TRINITY_DN19842_c6_g1	TRINITY_DN1284_c0_g2	TRINITY_DN19480_c5_g2
OG0001224	NA	NA	NA	NA	NA	NA	NA	DW	NA	8	1	0	1	1	OG0001224	TRINITY_DN901_c6_g1	TRINITY_DN16142_c0_g5	TRINITY_DN48739_c1_g3	TRINITY_DN38729_c0_g1	TRINITY_DN29087_c0_g1	TRINITY_DN20770_c1_g1			TRINITY_DN23150_c3_g1
OG0001227	NA	NA	NA	DW	NA	NA	NA	NA	NA	8	1	0	1	1	OG0001227	TRINITY_DN333_c0_g1	TRINITY_DN17696_c3_g1	TRINITY_DN46636_c2_g1	TRINITY_DN59458_c0_g1	TRINITY_DN22049_c0_g1	TRINITY_DN19476_c3_g1	TRINITY_DN17554_c0_g1	TRINITY_DN643_c1_g2	TRINITY_DN23675_c2_g2
OG0001230	NA	NA	UP	NA	NA	NA	NA	NA	NA	8	0	1	1	1	OG0001230	TRINITY_DN33765_c2_g1	TRINITY_DN39542_c0_g1	TRINITY_DN18495_c0_g1	TRINITY_DN24625_c0_g1		TRINITY_DN18795_c1_g1	TRINITY_DN37655_c0_g1	TRINITY_DN7832_c1_g1
OG0001232	NA	NA	UP	NA	NA	NA	NA	NA	NA	8	0	1	1	1	OG0001232	TRINITY_DN340_c5_g1	TRINITY_DN19058_c5_g1	TRINITY_DN39250_c0_g1	TRINITY_DN24125_c5_g1	TRINITY_DN25162_c9_g1	TRINITY_DN14181_c5_g1	TRINITY_DN21153_c5_g1	TRINITY_DN2623_c1_g1	TRINITY_DN21166_c4_g1
OG0001235	NA	NA	UP	NA	NA	NA	NA	NA	NA	8	0	1	1	1	OG0001235	TRINITY_DN34227_c1_g1	TRINITY_DN17622_c6_g2	TRINITY_DN48977_c2_g2	TRINITY_DN21527_c12_g1	TRINITY_DN21039_c4_g2	TRINITY_DN16165_c4_g2	TRINITY_DN19458_c6_g5	TRINITY_DN430_c1_g4	TRINITY_DN23946_c2_g11
OG0001239	NA	NA	UP	NA	NA	NA	NA	NA	NA	8	0	1	1	1	OG0001239	TRINITY_DN34927_c2_g1	TRINITY_DN32659_c0_g1	TRINITY_DN16617_c0_g1		TRINITY_DN16684_c0_g3	TRINITY_DN34829_c0_g1	TRINITY_DN34731_c0_g1	TRINITY_DN5091_c3_g1
OG0001242	NA	NA	DW	NA	NA	NA	NA	NA	NA	8	1	0	1	1	OG0001242	TRINITY_DN35_c0_g3	TRINITY_DN19150_c4_g7	TRINITY_DN48243_c1_g3	TRINITY_DN23674_c3_g5	TRINITY_DN20865_c4_g1	TRINITY_DN16742_c1_g2		TRINITY_DN2240_c0_g2	TRINITY_DN22778_c2_g2
OG0001245	NA	NA	UP	NA	NA	NA	NA	NA	NA	8	0	1	1	1	OG0001245	TRINITY_DN3668_c0_g2	TRINITY_DN16815_c8_g1	TRINITY_DN46987_c0_g1	TRINITY_DN24294_c4_g1	TRINITY_DN25105_c6_g1	TRINITY_DN16101_c2_g1	TRINITY_DN20787_c5_g1	TRINITY_DN3847_c1_g2	TRINITY_DN20592_c6_g7
OG0001262	NA	NA	NA	NA	NA	NA	NA	UP	NA	8	0	1	1	1	OG0001262	TRINITY_DN40777_c0_g1	TRINITY_DN11975_c0_g1	TRINITY_DN32596_c0_g1	TRINITY_DN43109_c0_g1	TRINITY_DN8139_c0_g1	TRINITY_DN19965_c2_g2	TRINITY_DN6143_c0_g2	TRINITY_DN6437_c1_g2	TRINITY_DN22302_c2_g3
OG0001263	NA	NA	NA	NA	UP	NA	NA	NA	NA	8	0	1	1	1	OG0001263	TRINITY_DN4237_c0_g1	TRINITY_DN19538_c2_g2	TRINITY_DN40513_c0_g2	TRINITY_DN17610_c0_g1	TRINITY_DN24938_c7_g2		TRINITY_DN19693_c1_g2	TRINITY_DN14627_c1_g1	TRINITY_DN19017_c8_g4
OG0001265	NA	NA	NA	NA	NA	NA	NA	DW	NA	8	1	0	1	1	OG0001265	TRINITY_DN4276_c0_g2	TRINITY_DN18577_c0_g1	TRINITY_DN42678_c9_g2	TRINITY_DN22705_c6_g1	TRINITY_DN24819_c6_g1	TRINITY_DN19086_c8_g1	TRINITY_DN20575_c4_g10		TRINITY_DN23398_c7_g3
OG0001266	NA	NA	DW	NA	NA	NA	NA	NA	NA	8	1	0	1	1	OG0001266	TRINITY_DN42_c2_g1	TRINITY_DN18333_c4_g1	TRINITY_DN43845_c10_g2	TRINITY_DN24568_c5_g1	TRINITY_DN23696_c9_g1	TRINITY_DN20565_c11_g2	TRINITY_DN20332_c2_g1	TRINITY_DN6700_c0_g2	TRINITY_DN23838_c9_g5
OG0001271	NA	NA	DW	NA	NA	NA	NA	NA	NA	8	1	0	1	1	OG0001271	TRINITY_DN4407_c2_g2	TRINITY_DN16705_c2_g7	TRINITY_DN48487_c1_g13	TRINITY_DN23149_c10_g1	TRINITY_DN21012_c6_g6	TRINITY_DN13304_c6_g1	TRINITY_DN18495_c7_g1	TRINITY_DN206_c5_g2	TRINITY_DN18245_c7_g2
OG0001272	NA	NA	NA	NA	NA	NA	DW	NA	NA	8	1	0	1	1	OG0001272	TRINITY_DN44856_c1_g1	TRINITY_DN4287_c0_g1	TRINITY_DN55558_c0_g1		TRINITY_DN22245_c0_g1	TRINITY_DN11124_c0_g3	TRINITY_DN1808_c0_g1	TRINITY_DN37237_c0_g1	TRINITY_DN19479_c6_g4
OG0001273	NA	NA	DW	NA	NA	NA	NA	NA	NA	8	1	0	1	1	OG0001273	TRINITY_DN449_c28_g1	TRINITY_DN16969_c9_g9	TRINITY_DN44947_c12_g1	TRINITY_DN23026_c6_g4	TRINITY_DN22863_c3_g1	TRINITY_DN18430_c4_g3	TRINITY_DN18335_c12_g1	TRINITY_DN2960_c3_g3	TRINITY_DN21127_c5_g3
OG0001274	NA	NA	DW	NA	NA	NA	NA	NA	NA	8	1	0	1	1	OG0001274	TRINITY_DN4534_c10_g1	TRINITY_DN17064_c4_g1	TRINITY_DN31495_c0_g1	TRINITY_DN19693_c0_g1	TRINITY_DN23123_c3_g2	TRINITY_DN20095_c6_g2	TRINITY_DN17932_c2_g1	TRINITY_DN57620_c1_g1	TRINITY_DN22612_c6_g1
OG0001282	NA	NA	NA	UP	NA	NA	NA	NA	NA	8	0	1	1	1	OG0001282	TRINITY_DN46837_c1_g1	TRINITY_DN8128_c0_g1	TRINITY_DN52944_c0_g1	TRINITY_DN5472_c0_g1	TRINITY_DN12545_c0_g2	TRINITY_DN15810_c6_g2	TRINITY_DN19254_c4_g1	TRINITY_DN662_c5_g1	TRINITY_DN18556_c7_g1
OG0001287	NA	NA	UP	NA	NA	NA	NA	NA	NA	8	0	1	1	1	OG0001287	TRINITY_DN49117_c0_g1		TRINITY_DN57485_c0_g1	TRINITY_DN19269_c0_g2	TRINITY_DN23186_c1_g1	TRINITY_DN2988_c0_g1	TRINITY_DN7795_c0_g1	TRINITY_DN20163_c2_g6	TRINITY_DN20132_c4_g2
OG0001290	NA	NA	NA	NA	NA	NA	NA	DW	NA	8	1	0	1	1	OG0001290	TRINITY_DN497_c2_g1	TRINITY_DN19085_c3_g1	TRINITY_DN44551_c3_g1	TRINITY_DN24328_c4_g3	TRINITY_DN22169_c5_g2	TRINITY_DN18707_c1_g1	TRINITY_DN20771_c3_g2		TRINITY_DN19312_c1_g4
OG0001292	NA	NA	UP	NA	NA	NA	NA	NA	NA	8	0	1	1	1	OG0001292	TRINITY_DN5060_c10_g1	TRINITY_DN19366_c5_g9	TRINITY_DN18693_c0_g1	TRINITY_DN12827_c0_g1	TRINITY_DN17443_c0_g1	TRINITY_DN15685_c2_g3	TRINITY_DN15717_c0_g1	TRINITY_DN16010_c1_g1	TRINITY_DN19961_c5_g1
OG0001293	NA	NA	UP	NA	NA	NA	NA	NA	NA	8	0	1	1	1	OG0001293	TRINITY_DN5082_c0_g1	TRINITY_DN17411_c6_g2	TRINITY_DN47669_c0_g1	TRINITY_DN24212_c6_g1	TRINITY_DN22774_c1_g1	TRINITY_DN19538_c2_g2	TRINITY_DN19050_c7_g1	TRINITY_DN1143_c3_g2	TRINITY_DN22907_c1_g2
OG0001297	NA	NA	NA	NA	NA	NA	NA	DW	NA	8	1	0	1	1	OG0001297	TRINITY_DN5272_c0_g2	TRINITY_DN16994_c5_g1	TRINITY_DN43739_c8_g2	TRINITY_DN24665_c4_g1	TRINITY_DN21563_c9_g1	TRINITY_DN20529_c7_g2	TRINITY_DN19312_c4_g1		TRINITY_DN36676_c0_g1
OG0001307	NA	NA	NA	DW	NA	NA	NA	NA	NA	8	1	0	1	1	OG0001307	TRINITY_DN5676_c1_g1	TRINITY_DN16468_c4_g2	TRINITY_DN47164_c0_g2	TRINITY_DN29635_c0_g1	TRINITY_DN21641_c5_g1	TRINITY_DN13603_c5_g1	TRINITY_DN19604_c3_g8	TRINITY_DN2788_c1_g3	TRINITY_DN44226_c0_g1
OG0001309	NA	NA	NA	NA	UP	NA	NA	NA	NA	8	0	1	1	1	OG0001309	TRINITY_DN5814_c5_g1	TRINITY_DN33053_c0_g1	TRINITY_DN46940_c0_g1	TRINITY_DN23459_c3_g2	TRINITY_DN22827_c4_g1		TRINITY_DN18728_c5_g1	TRINITY_DN4155_c0_g1	TRINITY_DN20544_c2_g1
OG0001312	NA	NA	DW	NA	NA	NA	NA	NA	NA	8	1	0	1	1	OG0001312	TRINITY_DN589_c2_g2	TRINITY_DN19736_c6_g2	TRINITY_DN41765_c1_g3	TRINITY_DN21394_c9_g1	TRINITY_DN21696_c7_g1	TRINITY_DN18867_c2_g4	TRINITY_DN17798_c3_g3	TRINITY_DN2635_c0_g3	TRINITY_DN20600_c1_g2
OG0001314	NA	NA	UP	NA	NA	NA	NA	NA	NA	8	0	1	1	1	OG0001314	TRINITY_DN5919_c1_g1	TRINITY_DN17968_c5_g1	TRINITY_DN44841_c3_g1	TRINITY_DN17578_c1_g1	TRINITY_DN47734_c0_g1	TRINITY_DN26364_c0_g1	TRINITY_DN19556_c8_g1	TRINITY_DN4807_c0_g1	TRINITY_DN18522_c6_g1
OG0001315	NA	NA	UP	NA	NA	NA	NA	NA	NA	8	0	1	1	1	OG0001315	TRINITY_DN6075_c0_g1	TRINITY_DN18884_c4_g2	TRINITY_DN45978_c5_g2	TRINITY_DN23666_c9_g1	TRINITY_DN20715_c5_g1	TRINITY_DN17441_c3_g1	TRINITY_DN18582_c2_g3	TRINITY_DN1506_c6_g1	TRINITY_DN22111_c8_g3
OG0001318	NA	NA	DW	NA	NA	NA	NA	NA	NA	8	1	0	1	1	OG0001318	TRINITY_DN61_c1_g1	TRINITY_DN19791_c5_g1	TRINITY_DN38709_c0_g1		TRINITY_DN24148_c3_g4	TRINITY_DN20323_c7_g1	TRINITY_DN19959_c7_g1	TRINITY_DN697_c0_g1	TRINITY_DN20520_c5_g1
OG0001330	NA	NA	NA	NA	NA	NA	NA	DW	NA	8	1	0	1	1	OG0001330	TRINITY_DN6949_c0_g1	TRINITY_DN11531_c0_g1	TRINITY_DN87102_c0_g1	TRINITY_DN51462_c0_g1	TRINITY_DN40507_c0_g1	TRINITY_DN12939_c4_g1	TRINITY_DN46902_c0_g1		TRINITY_DN22289_c7_g5
OG0001333	NA	NA	NA	NA	UP	NA	NA	NA	NA	8	0	1	1	1	OG0001333	TRINITY_DN935_c7_g2	TRINITY_DN18060_c3_g2	TRINITY_DN44561_c0_g2	TRINITY_DN23682_c8_g1	TRINITY_DN24196_c3_g1	TRINITY_DN18410_c5_g1	TRINITY_DN20575_c4_g2	TRINITY_DN4125_c0_g1	TRINITY_DN20018_c1_g1
OG0001337	NA	NA	UP	NA	NA	NA	NA	NA	NA	8	0	1	1	1	OG0001337	TRINITY_DN7132_c0_g2	TRINITY_DN16922_c7_g1	TRINITY_DN46861_c0_g1	TRINITY_DN23064_c7_g5	TRINITY_DN22869_c4_g1	TRINITY_DN16888_c6_g1	TRINITY_DN16189_c0_g1	TRINITY_DN1609_c0_g1	TRINITY_DN23832_c1_g3
OG0001343	NA	NA	UP	NA	NA	NA	NA	NA	NA	8	0	1	1	1	OG0001343	TRINITY_DN770_c0_g1		TRINITY_DN48188_c2_g1	TRINITY_DN24054_c4_g2	TRINITY_DN21983_c3_g1	TRINITY_DN19779_c2_g1	TRINITY_DN19620_c2_g4	TRINITY_DN14403_c1_g2	TRINITY_DN23785_c6_g2
OG0001362	NA	NA	NA	NA	NA	NA	UP	NA	NA	8	0	1	1	1	OG0001362	TRINITY_DN912_c2_g1	TRINITY_DN19653_c12_g1	TRINITY_DN74189_c0_g1	TRINITY_DN16869_c0_g1	TRINITY_DN25207_c6_g1	TRINITY_DN12036_c0_g2	TRINITY_DN17015_c0_g1	TRINITY_DN1311_c0_g4
OG0001364	NA	NA	NA	NA	NA	NA	NA	DW	NA	8	1	0	1	1	OG0001364	TRINITY_DN921_c2_g1	TRINITY_DN18078_c0_g2	TRINITY_DN44686_c0_g2	TRINITY_DN22952_c2_g1	TRINITY_DN24318_c4_g1	TRINITY_DN21245_c4_g1	TRINITY_DN17854_c1_g1		TRINITY_DN18968_c4_g4
OG0001371	NA	NA	DW	NA	NA	NA	NA	NA	NA	8	1	0	1	1	OG0001371	TRINITY_DN97_c1_g1	TRINITY_DN19081_c7_g2	TRINITY_DN46882_c1_g4	TRINITY_DN24363_c7_g1	TRINITY_DN21254_c6_g3	TRINITY_DN20331_c6_g1	TRINITY_DN19154_c4_g1	TRINITY_DN3311_c1_g1	TRINITY_DN22528_c4_g2
OG0001373	NA	NA	NA	DW	NA	NA	NA	NA	NA	8	1	0	1	1	OG0001373		TRINITY_DN11059_c0_g1	TRINITY_DN39103_c1_g1	TRINITY_DN14691_c0_g1	TRINITY_DN3313_c0_g1	TRINITY_DN14222_c2_g1	TRINITY_DN31214_c0_g1	TRINITY_DN21152_c1_g1	TRINITY_DN18653_c3_g1
OG0001375	NA	NA	NA	NA	NA	NA	NA	DW	NA	8	1	0	1	1	OG0001375		TRINITY_DN13410_c0_g2	TRINITY_DN61940_c0_g1	TRINITY_DN59296_c0_g1	TRINITY_DN23184_c8_g1	TRINITY_DN18784_c2_g5	TRINITY_DN14347_c0_g1		TRINITY_DN60739_c0_g1
OG0001385	NA	NA	DW	NA	NA	NA	NA	NA	NA	8	1	0	1	1	OG0001385		TRINITY_DN17544_c0_g1	TRINITY_DN82877_c0_g1	TRINITY_DN46726_c0_g1	TRINITY_DN41305_c0_g1	TRINITY_DN15416_c1_g1	TRINITY_DN14160_c0_g1	TRINITY_DN9125_c6_g1	TRINITY_DN20743_c5_g1
OG0001395	NA	NA	UP	NA	NA	NA	NA	NA	NA	8	0	1	1	1	OG0001395		TRINITY_DN19537_c7_g4	TRINITY_DN42159_c7_g6	TRINITY_DN23326_c3_g1	TRINITY_DN23980_c1_g3	TRINITY_DN12545_c2_g10	TRINITY_DN20437_c2_g1	TRINITY_DN3513_c3_g1	TRINITY_DN22178_c6_g2
OG0001400	NA	NA	DW	NA	NA	NA	NA	NA	NA	8	1	0	1	1	OG0001400		TRINITY_DN27893_c0_g1	TRINITY_DN16065_c0_g1	TRINITY_DN41978_c0_g1	TRINITY_DN23973_c5_g4	TRINITY_DN15469_c3_g4		TRINITY_DN12012_c0_g2	TRINITY_DN38388_c0_g1
OG0001401	NA	NA	NA	NA	NA	NA	NA	NA	UP	8	0	1	1	1	OG0001401		TRINITY_DN45717_c0_g1	TRINITY_DN69777_c0_g1	TRINITY_DN58978_c0_g1	TRINITY_DN18760_c7_g4	TRINITY_DN12416_c2_g2	TRINITY_DN2340_c0_g2	TRINITY_DN11335_c2_g1	TRINITY_DN18237_c1_g2
OG0001402	NA	NA	NA	NA	NA	NA	NA	NA	DW	8	1	0	1	1	OG0001402		TRINITY_DN33196_c0_g1	TRINITY_DN46476_c0_g1	TRINITY_DN18018_c0_g1	TRINITY_DN13333_c0_g1	TRINITY_DN20607_c5_g1	TRINITY_DN22313_c0_g1	TRINITY_DN29361_c2_g1	TRINITY_DN18891_c5_g1
OG0001405	NA	NA	DW	NA	NA	NA	NA	NA	NA	8	1	0	1	1	OG0001405			TRINITY_DN13189_c0_g1	TRINITY_DN22286_c1_g1	TRINITY_DN37843_c0_g1	TRINITY_DN21142_c9_g3	TRINITY_DN38675_c0_g1	TRINITY_DN16299_c0_g1	TRINITY_DN20016_c19_g1
OG0001407	NA	NA	NA	NA	UP	NA	NA	NA	NA	8	0	1	1	1	OG0001407			TRINITY_DN39713_c0_g1	TRINITY_DN1740_c0_g1	TRINITY_DN15362_c0_g1	TRINITY_DN11711_c0_g1	TRINITY_DN7302_c0_g1	TRINITY_DN23632_c1_g1	TRINITY_DN22075_c10_g1
OG0001413	NA	NA	DW	NA	NA	NA	NA	NA	NA	8	1	0	1	1	OG0001413	TRINITY_DN10107_c0_g2	TRINITY_DN18274_c4_g1	TRINITY_DN45024_c8_g1	TRINITY_DN22752_c0_g1	TRINITY_DN18595_c8_g1	TRINITY_DN19162_c2_g4	TRINITY_DN21002_c5_g8	TRINITY_DN1486_c1_g3	TRINITY_DN23460_c7_g1
OG0001414	NA	NA	NA	DW	NA	NA	NA	NA	NA	8	1	0	1	1	OG0001414	TRINITY_DN1017_c0_g2	TRINITY_DN18977_c1_g4	TRINITY_DN41368_c0_g1	TRINITY_DN7582_c0_g1	TRINITY_DN13464_c0_g1	TRINITY_DN19396_c3_g1		TRINITY_DN14439_c0_g1	TRINITY_DN4871_c0_g1
OG0001415	UP	NA	NA	NA	NA	NA	NA	NA	NA	8	0	1	1	1	OG0001415	TRINITY_DN1023_c3_g1	TRINITY_DN19544_c2_g1	TRINITY_DN47736_c4_g2	TRINITY_DN23558_c2_g1	TRINITY_DN22458_c7_g1	TRINITY_DN20196_c9_g1	TRINITY_DN17872_c0_g1	TRINITY_DN471_c4_g3	TRINITY_DN21418_c4_g1
OG0001419	NA	NA	DW	NA	NA	NA	NA	NA	NA	8	1	0	1	1	OG0001419	TRINITY_DN10430_c2_g1	TRINITY_DN15265_c0_g1	TRINITY_DN17063_c0_g1	TRINITY_DN24889_c6_g1	TRINITY_DN43472_c0_g1	TRINITY_DN19291_c4_g1	TRINITY_DN19403_c6_g2	TRINITY_DN4683_c1_g1	TRINITY_DN18634_c15_g1
OG0001426	NA	NA	DW	NA	NA	NA	NA	NA	NA	8	1	0	1	1	OG0001426	TRINITY_DN1086_c0_g1	TRINITY_DN19351_c5_g8	TRINITY_DN42043_c10_g1	TRINITY_DN22581_c6_g1	TRINITY_DN21282_c3_g1	TRINITY_DN20282_c6_g1	TRINITY_DN18913_c2_g4	TRINITY_DN15458_c1_g1	TRINITY_DN18599_c2_g1
OG0001428	UP	NA	NA	NA	NA	NA	NA	NA	NA	8	0	1	1	1	OG0001428	TRINITY_DN1202_c11_g1	TRINITY_DN17290_c6_g1	TRINITY_DN47548_c0_g2	TRINITY_DN21823_c11_g2	TRINITY_DN20490_c8_g1	TRINITY_DN19954_c5_g5	TRINITY_DN20419_c8_g1	TRINITY_DN1004_c1_g1	TRINITY_DN20568_c4_g1
OG0001430	NA	NA	UP	NA	NA	NA	NA	NA	NA	8	0	1	1	1	OG0001430	TRINITY_DN1104_c0_g2	TRINITY_DN19756_c12_g1	TRINITY_DN48662_c1_g2	TRINITY_DN23551_c0_g2	TRINITY_DN23832_c5_g1	TRINITY_DN17734_c9_g1	TRINITY_DN18074_c0_g2	TRINITY_DN2476_c1_g4	TRINITY_DN22611_c11_g1
OG0001442	NA	DW	NA	NA	NA	NA	NA	NA	NA	8	1	0	1	1	OG0001442	TRINITY_DN1156_c1_g1	TRINITY_DN22302_c0_g1	TRINITY_DN37564_c0_g1	TRINITY_DN20784_c0_g1	TRINITY_DN22405_c3_g2	TRINITY_DN17574_c2_g3	TRINITY_DN24896_c0_g1	TRINITY_DN1004_c3_g4	TRINITY_DN56666_c0_g1
OG0001448	NA	NA	DW	NA	NA	NA	NA	NA	NA	8	1	0	1	1	OG0001448	TRINITY_DN1194_c6_g2	TRINITY_DN19748_c7_g1	TRINITY_DN49029_c1_g2	TRINITY_DN21893_c10_g4	TRINITY_DN22609_c2_g1	TRINITY_DN17104_c4_g1	TRINITY_DN18314_c9_g2	TRINITY_DN2318_c0_g1	TRINITY_DN19037_c9_g2
OG0001449	NA	NA	DW	NA	NA	NA	NA	NA	NA	8	1	0	1	1	OG0001449	TRINITY_DN1194_c7_g1	TRINITY_DN17086_c2_g1	TRINITY_DN47678_c5_g2	TRINITY_DN21631_c0_g1	TRINITY_DN20635_c7_g1	TRINITY_DN13871_c1_g1	TRINITY_DN18519_c10_g1	TRINITY_DN1288_c1_g1	TRINITY_DN18968_c4_g3
OG0001460	UP	NA	NA	NA	NA	NA	NA	NA	NA	8	0	1	1	1	OG0001460	TRINITY_DN12822_c2_g2	TRINITY_DN17611_c3_g1	TRINITY_DN45222_c2_g2	TRINITY_DN21584_c4_g1	TRINITY_DN21330_c3_g1	TRINITY_DN16259_c4_g1	TRINITY_DN19285_c12_g1	TRINITY_DN2423_c3_g1	TRINITY_DN22380_c5_g2
OG0001463	NA	NA	NA	DW	NA	NA	NA	NA	NA	8	1	0	1	1	OG0001463	TRINITY_DN12914_c1_g2	TRINITY_DN18962_c6_g4	TRINITY_DN48336_c1_g1	TRINITY_DN29465_c0_g1	TRINITY_DN22269_c13_g2	TRINITY_DN16564_c6_g1	TRINITY_DN18790_c4_g3	TRINITY_DN2317_c9_g1	TRINITY_DN18312_c9_g1
OG0001464	NA	NA	UP	NA	NA	NA	NA	NA	NA	8	0	1	1	1	OG0001464	TRINITY_DN1309_c1_g2	TRINITY_DN17631_c3_g1	TRINITY_DN41437_c0_g1	TRINITY_DN24045_c10_g1	TRINITY_DN24943_c7_g1	TRINITY_DN13503_c2_g1	TRINITY_DN20362_c10_g1	TRINITY_DN4063_c0_g1	TRINITY_DN19274_c4_g1
OG0001466	NA	NA	DW	NA	NA	NA	NA	NA	NA	8	1	0	1	1	OG0001466	TRINITY_DN130_c1_g1	TRINITY_DN16462_c2_g7	TRINITY_DN46503_c8_g1	TRINITY_DN23346_c8_g3	TRINITY_DN20184_c6_g1	TRINITY_DN13382_c6_g1	TRINITY_DN17828_c12_g2	TRINITY_DN325_c0_g1	TRINITY_DN20717_c0_g1
OG0001468	NA	NA	DW	NA	NA	NA	NA	NA	NA	8	1	0	1	1	OG0001468	TRINITY_DN1313_c1_g2	TRINITY_DN19323_c0_g6	TRINITY_DN44057_c0_g4	TRINITY_DN23946_c3_g4		TRINITY_DN16216_c2_g4	TRINITY_DN19529_c5_g1	TRINITY_DN2811_c1_g1	TRINITY_DN19124_c5_g1
OG0001473	NA	NA	NA	NA	NA	NA	NA	NA	DW	8	1	0	1	1	OG0001473	TRINITY_DN1340_c0_g1	TRINITY_DN18758_c10_g1	TRINITY_DN48417_c5_g1	TRINITY_DN23489_c0_g1	TRINITY_DN19803_c5_g1	TRINITY_DN16360_c3_g1	TRINITY_DN18242_c3_g2	TRINITY_DN1760_c0_g2	TRINITY_DN21768_c2_g1
OG0001475	NA	NA	NA	NA	NA	NA	NA	DW	NA	8	1	0	1	1	OG0001475	TRINITY_DN1344_c5_g2	TRINITY_DN43691_c0_g1	TRINITY_DN89052_c0_g1	TRINITY_DN25411_c0_g1	TRINITY_DN23767_c2_g1		TRINITY_DN33362_c0_g1		TRINITY_DN21481_c5_g2
OG0001483	NA	NA	NA	NA	UP	NA	NA	NA	NA	8	0	1	1	1	OG0001483	TRINITY_DN14013_c0_g1	TRINITY_DN57_c0_g1	TRINITY_DN43445_c0_g1	TRINITY_DN20218_c0_g2	TRINITY_DN23940_c10_g1	TRINITY_DN15305_c10_g1	TRINITY_DN12692_c0_g3	TRINITY_DN2020_c0_g1	TRINITY_DN18587_c3_g1
OG0001485	NA	NA	DW	NA	NA	NA	NA	NA	NA	8	1	0	1	1	OG0001485	TRINITY_DN14050_c2_g1	TRINITY_DN14712_c0_g1	TRINITY_DN16990_c0_g1	TRINITY_DN10313_c0_g2	TRINITY_DN23420_c7_g1	TRINITY_DN13609_c3_g1		TRINITY_DN29780_c0_g1	TRINITY_DN22309_c0_g1
OG0001486	NA	DW	NA	NA	NA	NA	NA	NA	NA	8	1	0	1	1	OG0001486	TRINITY_DN1410_c0_g2	TRINITY_DN38740_c0_g1	TRINITY_DN40957_c0_g1	TRINITY_DN20571_c0_g1	TRINITY_DN25310_c1_g1	TRINITY_DN13150_c10_g2		TRINITY_DN3080_c0_g2	TRINITY_DN17928_c0_g1
OG0001488	DW	NA	NA	NA	NA	NA	NA	NA	NA	8	1	0	1	1	OG0001488	TRINITY_DN1423_c16_g1	TRINITY_DN17544_c7_g1	TRINITY_DN45847_c3_g1	TRINITY_DN23334_c13_g1	TRINITY_DN23445_c3_g1	TRINITY_DN15965_c0_g1	TRINITY_DN20923_c6_g5	TRINITY_DN6271_c0_g3	TRINITY_DN21875_c7_g1
OG0001489	NA	NA	DW	NA	NA	NA	NA	NA	NA	8	1	0	1	1	OG0001489	TRINITY_DN14316_c0_g2	TRINITY_DN17685_c6_g1	TRINITY_DN45802_c7_g6	TRINITY_DN22861_c3_g5	TRINITY_DN20288_c4_g2	TRINITY_DN15237_c3_g1	TRINITY_DN20631_c6_g6	TRINITY_DN825_c1_g2	TRINITY_DN23856_c6_g3
OG0001490	NA	NA	UP	NA	NA	NA	NA	NA	NA	8	0	1	1	1	OG0001490	TRINITY_DN14374_c0_g1	TRINITY_DN16622_c9_g4	TRINITY_DN35446_c0_g1	TRINITY_DN8678_c0_g1	TRINITY_DN23418_c5_g2	TRINITY_DN14235_c6_g2	TRINITY_DN35281_c0_g1	TRINITY_DN1097_c0_g1	TRINITY_DN23273_c7_g2
OG0001493	NA	NA	DW	NA	NA	NA	NA	NA	NA	8	1	0	1	1	OG0001493	TRINITY_DN1486_c0_g2	TRINITY_DN18000_c4_g1	TRINITY_DN43147_c4_g1	TRINITY_DN19675_c0_g1	TRINITY_DN24939_c5_g1	TRINITY_DN13720_c6_g4	TRINITY_DN21286_c3_g1	TRINITY_DN3755_c2_g3	TRINITY_DN18263_c4_g1
OG0001495	NA	NA	NA	NA	NA	NA	NA	NA	UP	8	0	1	1	1	OG0001495	TRINITY_DN15010_c2_g1	TRINITY_DN19146_c1_g1	TRINITY_DN5873_c0_g1	TRINITY_DN24284_c0_g1	TRINITY_DN19372_c3_g1	TRINITY_DN21108_c4_g1	TRINITY_DN17697_c0_g1	TRINITY_DN1962_c0_g2	TRINITY_DN18294_c4_g3
OG0001497	NA	NA	UP	NA	NA	NA	NA	NA	NA	8	0	1	1	1	OG0001497	TRINITY_DN1517_c1_g1	TRINITY_DN19788_c0_g2	TRINITY_DN39436_c0_g1	TRINITY_DN14823_c0_g1	TRINITY_DN19750_c1_g6	TRINITY_DN21321_c6_g2	TRINITY_DN18891_c0_g1	TRINITY_DN12273_c1_g2	TRINITY_DN23387_c2_g4
OG0001499	NA	NA	DW	NA	NA	NA	NA	NA	NA	8	1	0	1	1	OG0001499	TRINITY_DN1560_c0_g2	TRINITY_DN19584_c3_g1	TRINITY_DN40039_c0_g2	TRINITY_DN22347_c11_g2	TRINITY_DN20741_c0_g2	TRINITY_DN14203_c9_g1	TRINITY_DN17976_c1_g3	TRINITY_DN3477_c1_g1	TRINITY_DN23144_c4_g1
OG0001504	NA	NA	DW	NA	NA	NA	NA	NA	NA	8	1	0	1	1	OG0001504	TRINITY_DN159_c0_g3	TRINITY_DN18242_c4_g3	TRINITY_DN42790_c8_g1	TRINITY_DN22027_c4_g1	TRINITY_DN24015_c1_g1	TRINITY_DN19909_c6_g1	TRINITY_DN18214_c8_g1	TRINITY_DN4904_c0_g2	TRINITY_DN22725_c5_g2
OG0001505	NA	NA	DW	NA	NA	NA	NA	NA	NA	8	1	0	1	1	OG0001505	TRINITY_DN15_c18_g1	TRINITY_DN16683_c7_g2	TRINITY_DN46695_c0_g1	TRINITY_DN24188_c3_g2	TRINITY_DN24416_c1_g1	TRINITY_DN15222_c10_g1	TRINITY_DN18607_c9_g1	TRINITY_DN2105_c1_g5	TRINITY_DN22902_c5_g1
OG0001508	NA	NA	DW	NA	NA	NA	NA	NA	NA	8	1	0	1	1	OG0001508	TRINITY_DN16549_c2_g1	TRINITY_DN18862_c2_g7	TRINITY_DN6025_c0_g1	TRINITY_DN19315_c0_g1	TRINITY_DN15508_c0_g1	TRINITY_DN8640_c0_g1		TRINITY_DN7264_c0_g2	TRINITY_DN18539_c1_g1
OG0001509	NA	NA	NA	NA	NA	NA	NA	NA	UP	8	0	1	1	1	OG0001509	TRINITY_DN16564_c0_g2	TRINITY_DN16965_c6_g2	TRINITY_DN46395_c0_g1	TRINITY_DN23832_c8_g1	TRINITY_DN25324_c6_g1	TRINITY_DN19789_c3_g1	TRINITY_DN18605_c10_g1	TRINITY_DN9812_c0_g1	TRINITY_DN23522_c3_g1
OG0001516	NA	NA	NA	NA	NA	NA	NA	DW	NA	8	1	0	1	1	OG0001516	TRINITY_DN16978_c0_g1	TRINITY_DN15837_c0_g1	TRINITY_DN43402_c0_g1	TRINITY_DN22485_c2_g1	TRINITY_DN19343_c5_g2	TRINITY_DN11974_c0_g1	TRINITY_DN16150_c0_g1	TRINITY_DN297_c1_g1	TRINITY_DN22632_c2_g3
OG0001517	NA	NA	UP	NA	NA	NA	NA	NA	NA	8	0	1	1	1	OG0001517	TRINITY_DN17146_c0_g1	TRINITY_DN45385_c0_g1	TRINITY_DN44500_c3_g1	TRINITY_DN21304_c0_g1	TRINITY_DN37451_c0_g1	TRINITY_DN12417_c9_g1	TRINITY_DN31664_c0_g1	TRINITY_DN1899_c0_g2	TRINITY_DN21463_c3_g2
OG0001521	NA	NA	DW	NA	NA	NA	NA	NA	NA	8	1	0	1	1	OG0001521	TRINITY_DN1725_c1_g2	TRINITY_DN17182_c1_g5	TRINITY_DN47265_c8_g1	TRINITY_DN23388_c8_g1	TRINITY_DN19926_c9_g1	TRINITY_DN13987_c2_g3	TRINITY_DN18215_c7_g2	TRINITY_DN4022_c0_g1	TRINITY_DN18564_c7_g4
OG0001524	NA	NA	NA	NA	UP	NA	NA	NA	NA	8	0	1	1	1	OG0001524	TRINITY_DN1772_c2_g1	TRINITY_DN16625_c2_g3	TRINITY_DN44393_c2_g4	TRINITY_DN24161_c6_g2	TRINITY_DN20570_c11_g1	TRINITY_DN17279_c2_g1	TRINITY_DN19052_c5_g2	TRINITY_DN11090_c0_g1	TRINITY_DN18792_c3_g5
OG0001525	NA	NA	NA	NA	NA	NA	NA	DW	NA	8	1	0	1	1	OG0001525	TRINITY_DN17843_c2_g1	TRINITY_DN16929_c6_g1	TRINITY_DN27446_c0_g1	TRINITY_DN23436_c4_g1	TRINITY_DN20566_c5_g1	TRINITY_DN16383_c1_g1	TRINITY_DN16476_c0_g1	TRINITY_DN4766_c0_g2	TRINITY_DN19191_c2_g2
OG0001535	NA	NA	DW	NA	NA	NA	NA	NA	NA	8	1	0	1	1	OG0001535	TRINITY_DN1880_c0_g1	TRINITY_DN19698_c2_g1	TRINITY_DN35743_c0_g1	TRINITY_DN24273_c2_g1	TRINITY_DN24828_c8_g1	TRINITY_DN17949_c11_g1	TRINITY_DN20140_c4_g1	TRINITY_DN5493_c0_g1	TRINITY_DN23667_c3_g1
OG0001539	NA	NA	NA	DW	NA	NA	NA	NA	NA	8	1	0	1	1	OG0001539	TRINITY_DN19339_c0_g1	TRINITY_DN19375_c5_g1	TRINITY_DN44817_c2_g1	TRINITY_DN35250_c0_g1	TRINITY_DN24700_c5_g1	TRINITY_DN19416_c4_g2	TRINITY_DN18890_c9_g1	TRINITY_DN1646_c0_g2	TRINITY_DN65162_c0_g1
OG0001546	NA	NA	UP	NA	NA	NA	NA	NA	NA	8	0	1	1	1	OG0001546	TRINITY_DN20211_c0_g1	TRINITY_DN14733_c0_g1	TRINITY_DN36641_c0_g1	TRINITY_DN19604_c0_g1	TRINITY_DN20363_c12_g1	TRINITY_DN16758_c3_g1	TRINITY_DN11850_c0_g1	TRINITY_DN329_c0_g3
OG0001551	NA	NA	NA	NA	UP	NA	NA	NA	NA	8	0	1	1	1	OG0001551	TRINITY_DN20912_c23_g1	TRINITY_DN18816_c4_g3	TRINITY_DN41321_c1_g3	TRINITY_DN23307_c0_g1	TRINITY_DN23248_c3_g1	TRINITY_DN20255_c2_g1	TRINITY_DN18192_c0_g1	TRINITY_DN2069_c0_g2	TRINITY_DN16805_c0_g1
OG0001554	NA	NA	UP	NA	NA	NA	NA	NA	NA	8	0	1	1	1	OG0001554	TRINITY_DN2107_c2_g1	TRINITY_DN16517_c3_g1	TRINITY_DN38627_c0_g1	TRINITY_DN23484_c8_g1	TRINITY_DN19635_c3_g1	TRINITY_DN16682_c10_g1	TRINITY_DN7545_c0_g1	TRINITY_DN141_c0_g1	TRINITY_DN21013_c6_g2
OG0001556	NA	NA	NA	NA	NA	NA	NA	UP	NA	8	0	1	1	1	OG0001556	TRINITY_DN21118_c2_g1	TRINITY_DN19040_c5_g4	TRINITY_DN11112_c0_g1	TRINITY_DN31020_c0_g1	TRINITY_DN22846_c1_g1	TRINITY_DN17594_c6_g2	TRINITY_DN20994_c10_g2	TRINITY_DN6824_c0_g2	TRINITY_DN18811_c7_g1
OG0001566	NA	NA	NA	NA	NA	NA	NA	DW	NA	8	1	0	1	1	OG0001566	TRINITY_DN220_c1_g1	TRINITY_DN15377_c0_g1	TRINITY_DN42478_c0_g1	TRINITY_DN21391_c7_g4	TRINITY_DN20412_c8_g1	TRINITY_DN14412_c7_g1	TRINITY_DN20536_c0_g1		TRINITY_DN20978_c1_g1
OG0001577	DW	NA	NA	NA	NA	NA	NA	NA	NA	8	1	0	1	1	OG0001577	TRINITY_DN2357_c7_g1	TRINITY_DN19645_c8_g2	TRINITY_DN41184_c0_g1	TRINITY_DN23612_c9_g1	TRINITY_DN22008_c4_g1	TRINITY_DN13631_c2_g1	TRINITY_DN19746_c1_g2	TRINITY_DN6684_c0_g2	TRINITY_DN19422_c4_g2
OG0001582	NA	NA	NA	NA	UP	NA	NA	NA	NA	8	0	1	1	1	OG0001582	TRINITY_DN23869_c2_g1	TRINITY_DN16227_c0_g1	TRINITY_DN47665_c1_g1	TRINITY_DN22508_c3_g4	TRINITY_DN17915_c0_g1	TRINITY_DN12729_c0_g1	TRINITY_DN13077_c0_g1	TRINITY_DN2966_c1_g2	TRINITY_DN21754_c5_g1
OG0001583	DW	NA	NA	NA	NA	NA	NA	NA	NA	8	1	0	1	1	OG0001583	TRINITY_DN238_c1_g1	TRINITY_DN18510_c2_g1	TRINITY_DN48474_c2_g2	TRINITY_DN23296_c3_g2		TRINITY_DN14411_c3_g1	TRINITY_DN20134_c3_g1	TRINITY_DN9008_c0_g1	TRINITY_DN22607_c3_g1
OG0001584	NA	NA	NA	NA	NA	NA	NA	DW	NA	8	1	0	1	1	OG0001584	TRINITY_DN23969_c4_g1	TRINITY_DN16469_c1_g3	TRINITY_DN42435_c6_g1	TRINITY_DN23593_c3_g2	TRINITY_DN19093_c5_g1	TRINITY_DN19926_c10_g4	TRINITY_DN20412_c0_g1		TRINITY_DN18528_c2_g1
OG0001586	NA	NA	DW	NA	NA	NA	NA	NA	NA	8	1	0	1	1	OG0001586	TRINITY_DN23_c0_g1	TRINITY_DN18997_c3_g1	TRINITY_DN39366_c0_g1	TRINITY_DN23643_c10_g3	TRINITY_DN21580_c4_g1	TRINITY_DN19405_c5_g1	TRINITY_DN21170_c6_g1	TRINITY_DN610_c1_g1	TRINITY_DN21152_c2_g2
OG0001587	NA	NA	DW	NA	NA	NA	NA	NA	NA	8	1	0	1	1	OG0001587	TRINITY_DN24217_c0_g2	TRINITY_DN19359_c8_g1	TRINITY_DN43111_c3_g2	TRINITY_DN21959_c1_g1	TRINITY_DN21713_c5_g1	TRINITY_DN15993_c4_g1	TRINITY_DN18744_c1_g1	TRINITY_DN3522_c1_g1	TRINITY_DN20882_c8_g1
OG0001590	NA	NA	UP	NA	NA	NA	NA	NA	NA	8	0	1	1	1	OG0001590	TRINITY_DN24300_c0_g1	TRINITY_DN16039_c0_g1	TRINITY_DN91926_c0_g1	TRINITY_DN20903_c0_g1	TRINITY_DN20759_c0_g1		TRINITY_DN15031_c0_g1	TRINITY_DN2545_c0_g1	TRINITY_DN23401_c1_g1
OG0001591	NA	NA	NA	NA	NA	NA	NA	DW	NA	8	1	0	1	1	OG0001591	TRINITY_DN24310_c5_g1	TRINITY_DN19395_c1_g2	TRINITY_DN36546_c0_g1	TRINITY_DN23044_c0_g3	TRINITY_DN27358_c0_g1	TRINITY_DN2216_c0_g1	TRINITY_DN25801_c0_g1		TRINITY_DN30420_c0_g1
OG0001595	NA	NA	DW	NA	NA	NA	NA	NA	NA	8	1	0	1	1	OG0001595	TRINITY_DN244_c4_g2	TRINITY_DN19503_c3_g1	TRINITY_DN46366_c0_g1	TRINITY_DN24432_c4_g1	TRINITY_DN25048_c5_g1	TRINITY_DN20877_c8_g1	TRINITY_DN20743_c1_g1	TRINITY_DN1612_c0_g1	TRINITY_DN18498_c4_g2
OG0001603	NA	NA	NA	NA	NA	NA	NA	UP	NA	8	0	1	1	1	OG0001603	TRINITY_DN25154_c1_g1	TRINITY_DN11364_c0_g2	TRINITY_DN44612_c3_g2	TRINITY_DN22416_c4_g1	TRINITY_DN19211_c4_g4	TRINITY_DN12822_c5_g3	TRINITY_DN20113_c11_g1	TRINITY_DN12442_c1_g1	TRINITY_DN18723_c5_g5
OG0001608	NA	NA	NA	NA	NA	NA	NA	NA	UP	8	0	1	1	1	OG0001608	TRINITY_DN2636_c1_g1	TRINITY_DN19423_c4_g2	TRINITY_DN41486_c9_g1	TRINITY_DN21804_c7_g2	TRINITY_DN23943_c6_g1	TRINITY_DN17650_c4_g1	TRINITY_DN20264_c5_g4	TRINITY_DN4150_c3_g2	TRINITY_DN22020_c0_g4
OG0001610	NA	NA	UP	NA	NA	NA	NA	NA	NA	8	0	1	1	1	OG0001610	TRINITY_DN2670_c3_g2		TRINITY_DN43797_c1_g1	TRINITY_DN24787_c3_g1	TRINITY_DN20727_c10_g2	TRINITY_DN13963_c7_g5	TRINITY_DN44486_c0_g1	TRINITY_DN8842_c0_g2	TRINITY_DN19528_c10_g2
OG0001613	NA	NA	NA	NA	NA	NA	NA	DW	NA	8	1	0	1	1	OG0001613	TRINITY_DN2737_c0_g3	TRINITY_DN15900_c0_g2	TRINITY_DN93446_c0_g1	TRINITY_DN24951_c12_g2	TRINITY_DN36693_c0_g1	TRINITY_DN12030_c0_g2	TRINITY_DN27742_c0_g1
OG0001617	NA	NA	UP	NA	NA	NA	NA	NA	NA	8	0	1	1	1	OG0001617	TRINITY_DN27772_c1_g1	TRINITY_DN46071_c0_g1	TRINITY_DN40499_c0_g1	TRINITY_DN20354_c0_g1	TRINITY_DN17248_c0_g1	TRINITY_DN11482_c0_g1		TRINITY_DN19490_c0_g2	TRINITY_DN20719_c2_g2
OG0001621	NA	NA	UP	NA	NA	NA	NA	NA	NA	8	0	1	1	1	OG0001621	TRINITY_DN280_c2_g2	TRINITY_DN18146_c10_g2	TRINITY_DN41191_c1_g1	TRINITY_DN23355_c15_g1	TRINITY_DN20543_c8_g1	TRINITY_DN15603_c4_g1	TRINITY_DN21083_c3_g2	TRINITY_DN1351_c0_g1	TRINITY_DN19757_c5_g1
OG0001626	NA	NA	UP	NA	NA	NA	NA	NA	NA	8	0	1	1	1	OG0001626	TRINITY_DN286_c19_g1	TRINITY_DN17191_c9_g1	TRINITY_DN47542_c0_g3	TRINITY_DN24383_c5_g1	TRINITY_DN22192_c2_g1	TRINITY_DN12339_c8_g1	TRINITY_DN17656_c5_g1	TRINITY_DN5299_c0_g1	TRINITY_DN18687_c5_g1
OG0001632	DW	NA	NA	NA	NA	NA	NA	NA	NA	8	1	0	1	1	OG0001632	TRINITY_DN29537_c3_g1	TRINITY_DN16571_c3_g1	TRINITY_DN40611_c0_g1	TRINITY_DN23156_c6_g2		TRINITY_DN20152_c8_g1	TRINITY_DN17652_c5_g10	TRINITY_DN3685_c3_g2	TRINITY_DN20904_c3_g1
OG0001633	NA	NA	NA	NA	NA	NA	NA	DW	NA	8	1	0	1	1	OG0001633	TRINITY_DN29905_c0_g1	TRINITY_DN2946_c0_g1	TRINITY_DN91524_c0_g1	TRINITY_DN50151_c0_g1	TRINITY_DN35955_c0_g1	TRINITY_DN6475_c0_g2			TRINITY_DN66235_c0_g1
OG0001640	NA	NA	UP	NA	NA	NA	NA	NA	NA	8	0	1	1	1	OG0001640	TRINITY_DN30_c0_g1	TRINITY_DN18769_c6_g1	TRINITY_DN47409_c8_g1	TRINITY_DN23464_c1_g3	TRINITY_DN24542_c4_g2	TRINITY_DN16273_c0_g1	TRINITY_DN18457_c5_g2	TRINITY_DN732_c0_g2	TRINITY_DN21499_c2_g2
OG0001644	NA	NA	DW	NA	NA	NA	NA	NA	NA	8	1	0	1	1	OG0001644	TRINITY_DN315_c0_g2	TRINITY_DN17598_c0_g7	TRINITY_DN41628_c2_g1	TRINITY_DN24648_c1_g1	TRINITY_DN25219_c3_g1	TRINITY_DN21079_c4_g1	TRINITY_DN21331_c3_g2	TRINITY_DN970_c0_g1	TRINITY_DN22540_c4_g1
OG0001645	NA	NA	DW	NA	NA	NA	NA	NA	NA	8	1	0	1	1	OG0001645	TRINITY_DN3163_c1_g2	TRINITY_DN16919_c0_g1	TRINITY_DN44917_c2_g2	TRINITY_DN24444_c2_g2	TRINITY_DN19770_c0_g1	TRINITY_DN20435_c6_g1	TRINITY_DN20939_c3_g1	TRINITY_DN4362_c1_g2	TRINITY_DN22026_c2_g3
OG0001648	NA	NA	UP	NA	NA	NA	NA	NA	NA	8	0	1	1	1	OG0001648	TRINITY_DN32041_c1_g1	TRINITY_DN16905_c6_g4	TRINITY_DN20830_c0_g1	TRINITY_DN21716_c11_g3	TRINITY_DN17528_c0_g1	TRINITY_DN16912_c4_g4	TRINITY_DN21002_c5_g2	TRINITY_DN13140_c0_g5	TRINITY_DN23652_c3_g1
OG0001650	NA	NA	UP	NA	NA	NA	NA	NA	NA	8	0	1	1	1	OG0001650	TRINITY_DN324_c3_g1	TRINITY_DN17610_c2_g4	TRINITY_DN41190_c0_g1	TRINITY_DN24049_c1_g2	TRINITY_DN20452_c9_g3	TRINITY_DN15372_c7_g2	TRINITY_DN17591_c6_g1	TRINITY_DN2648_c0_g2	TRINITY_DN21547_c2_g1
OG0001651	NA	NA	DW	NA	NA	NA	NA	NA	NA	8	1	0	1	1	OG0001651	TRINITY_DN3261_c6_g1	TRINITY_DN19790_c2_g2	TRINITY_DN47355_c0_g2	TRINITY_DN24116_c6_g1	TRINITY_DN24909_c5_g2	TRINITY_DN21374_c6_g2	TRINITY_DN19360_c1_g2	TRINITY_DN671_c2_g2	TRINITY_DN19669_c2_g1
OG0001652	NA	NA	NA	NA	NA	NA	NA	DW	NA	8	1	0	1	1	OG0001652	TRINITY_DN32690_c0_g1	TRINITY_DN4530_c0_g1	TRINITY_DN36662_c0_g1	TRINITY_DN19651_c0_g1	TRINITY_DN23060_c15_g1	TRINITY_DN15896_c7_g2	TRINITY_DN38168_c0_g1		TRINITY_DN19075_c4_g1
OG0001656	NA	NA	NA	NA	NA	NA	NA	DW	NA	8	1	0	1	1	OG0001656	TRINITY_DN3331_c0_g2	TRINITY_DN18250_c5_g2	TRINITY_DN47302_c1_g2	TRINITY_DN23275_c2_g2	TRINITY_DN20598_c6_g1	TRINITY_DN13439_c1_g1	TRINITY_DN19087_c3_g1		TRINITY_DN19616_c8_g1
OG0001658	NA	NA	DW	NA	NA	NA	NA	NA	NA	8	1	0	1	1	OG0001658	TRINITY_DN335_c0_g4	TRINITY_DN17518_c1_g5	TRINITY_DN48829_c0_g2	TRINITY_DN24619_c4_g1	TRINITY_DN24425_c7_g1	TRINITY_DN12771_c0_g3	TRINITY_DN21339_c4_g4	TRINITY_DN2691_c0_g2	TRINITY_DN21766_c1_g2
OG0001662	NA	NA	NA	NA	NA	NA	NA	NA	DW	8	1	0	1	1	OG0001662	TRINITY_DN34280_c5_g1	TRINITY_DN32326_c0_g1	TRINITY_DN4238_c0_g1	TRINITY_DN22878_c9_g3	TRINITY_DN5961_c0_g1		TRINITY_DN20309_c6_g3	TRINITY_DN23582_c0_g2	TRINITY_DN19112_c4_g2
OG0001670	NA	NA	NA	NA	NA	NA	UP	NA	NA	8	0	1	1	1	OG0001670	TRINITY_DN356_c1_g1	TRINITY_DN15561_c0_g1	TRINITY_DN49015_c1_g1	TRINITY_DN21375_c0_g1	TRINITY_DN20894_c0_g1	TRINITY_DN17434_c1_g1	TRINITY_DN14041_c0_g1	TRINITY_DN674_c0_g2	TRINITY_DN20445_c1_g3
OG0001671	NA	NA	NA	NA	UP	NA	NA	NA	NA	8	0	1	1	1	OG0001671	TRINITY_DN36205_c1_g1	TRINITY_DN23321_c0_g1	TRINITY_DN82518_c0_g1	TRINITY_DN54060_c0_g1	TRINITY_DN25342_c5_g1	TRINITY_DN18938_c8_g1	TRINITY_DN14708_c0_g1	TRINITY_DN52142_c1_g1
OG0001672	NA	NA	NA	NA	UP	NA	NA	NA	NA	8	0	1	1	1	OG0001672	TRINITY_DN37329_c1_g1	TRINITY_DN18792_c13_g1	TRINITY_DN17993_c0_g1	TRINITY_DN14994_c0_g2	TRINITY_DN20133_c0_g1	TRINITY_DN16423_c4_g1	TRINITY_DN19125_c5_g7	TRINITY_DN7147_c0_g1	TRINITY_DN21307_c4_g1
OG0001674	NA	NA	NA	NA	NA	NA	NA	DW	NA	8	1	0	1	1	OG0001674	TRINITY_DN367_c0_g3	TRINITY_DN19091_c0_g1	TRINITY_DN43105_c6_g2	TRINITY_DN22379_c5_g2	TRINITY_DN23576_c6_g2	TRINITY_DN14143_c10_g1	TRINITY_DN20953_c2_g8		TRINITY_DN22199_c6_g3
OG0001675	NA	NA	UP	NA	NA	NA	NA	NA	NA	8	0	1	1	1	OG0001675	TRINITY_DN3688_c0_g3		TRINITY_DN88602_c0_g1	TRINITY_DN38060_c0_g1	TRINITY_DN46157_c0_g1	TRINITY_DN4645_c0_g1	TRINITY_DN19781_c2_g4	TRINITY_DN13711_c0_g1	TRINITY_DN22460_c11_g5
OG0001678	NA	NA	UP	NA	NA	NA	NA	NA	NA	8	0	1	1	1	OG0001678	TRINITY_DN37895_c1_g1	TRINITY_DN16721_c7_g20	TRINITY_DN45032_c8_g1	TRINITY_DN24122_c6_g1	TRINITY_DN5622_c0_g1	TRINITY_DN16134_c1_g1	TRINITY_DN30698_c0_g1	TRINITY_DN731_c1_g2	TRINITY_DN23128_c6_g1
OG0001680	NA	NA	UP	NA	NA	NA	NA	NA	NA	8	0	1	1	1	OG0001680	TRINITY_DN3850_c0_g1	TRINITY_DN16849_c2_g1	TRINITY_DN45142_c0_g1	TRINITY_DN23623_c4_g2	TRINITY_DN18093_c2_g1	TRINITY_DN12887_c7_g2	TRINITY_DN20135_c7_g1	TRINITY_DN3886_c0_g1	TRINITY_DN20663_c5_g5
OG0001681	NA	NA	DW	NA	NA	NA	NA	NA	NA	8	1	0	1	1	OG0001681	TRINITY_DN3887_c0_g1	TRINITY_DN17723_c3_g1	TRINITY_DN38697_c0_g1	TRINITY_DN24677_c3_g1	TRINITY_DN19195_c1_g1	TRINITY_DN13068_c8_g1	TRINITY_DN20952_c4_g1	TRINITY_DN3591_c0_g1	TRINITY_DN22011_c1_g1
OG0001682	NA	NA	NA	NA	NA	NA	NA	DW	NA	8	1	0	1	1	OG0001682	TRINITY_DN3974_c0_g3	TRINITY_DN15743_c0_g1	TRINITY_DN40554_c0_g1	TRINITY_DN21972_c9_g1	TRINITY_DN24294_c3_g1	TRINITY_DN21383_c7_g2	TRINITY_DN18125_c9_g4	TRINITY_DN5374_c0_g2	TRINITY_DN20698_c5_g1
OG0001684	NA	NA	DW	NA	NA	NA	NA	NA	NA	8	1	0	1	1	OG0001684	TRINITY_DN40534_c0_g1	TRINITY_DN18701_c2_g2	TRINITY_DN79641_c0_g1	TRINITY_DN50233_c0_g1	TRINITY_DN18252_c1_g1	TRINITY_DN12894_c4_g1	TRINITY_DN3147_c0_g1	TRINITY_DN12442_c0_g1	TRINITY_DN18505_c7_g1
OG0001685	NA	NA	NA	NA	NA	NA	NA	NA	UP	8	0	1	1	1	OG0001685	TRINITY_DN4066_c0_g1	TRINITY_DN18426_c1_g5	TRINITY_DN46959_c4_g1	TRINITY_DN23794_c4_g1	TRINITY_DN19689_c9_g1	TRINITY_DN12945_c5_g1	TRINITY_DN20337_c9_g1	TRINITY_DN1771_c1_g2	TRINITY_DN21390_c3_g8
OG0001694	DW	NA	NA	NA	NA	NA	NA	NA	NA	8	1	0	1	1	OG0001694	TRINITY_DN42903_c0_g1	TRINITY_DN1626_c0_g1	TRINITY_DN37586_c0_g1	TRINITY_DN17733_c0_g1		TRINITY_DN15457_c2_g10	TRINITY_DN15648_c0_g1	TRINITY_DN1563_c1_g3	TRINITY_DN15149_c0_g1
OG0001698	DW	NA	NA	NA	NA	NA	NA	NA	NA	8	1	0	1	1	OG0001698	TRINITY_DN44069_c1_g1	TRINITY_DN17916_c9_g1	TRINITY_DN44929_c4_g2	TRINITY_DN24738_c5_g4	TRINITY_DN25055_c8_g2	TRINITY_DN14204_c4_g1	TRINITY_DN20802_c7_g3	TRINITY_DN1952_c0_g1	TRINITY_DN20844_c2_g1
OG0001700	NA	NA	DW	NA	NA	NA	NA	NA	NA	8	1	0	1	1	OG0001700	TRINITY_DN449_c17_g1	TRINITY_DN16537_c0_g1	TRINITY_DN35602_c0_g1	TRINITY_DN24758_c4_g15	TRINITY_DN18585_c5_g5			TRINITY_DN25372_c0_g1	TRINITY_DN22167_c8_g6
OG0001701	NA	NA	UP	NA	NA	NA	NA	NA	NA	8	0	1	1	1	OG0001701	TRINITY_DN44_c2_g2	TRINITY_DN16544_c7_g4	TRINITY_DN44930_c6_g1	TRINITY_DN23420_c4_g1	TRINITY_DN24859_c10_g1	TRINITY_DN12868_c5_g5	TRINITY_DN17984_c3_g2	TRINITY_DN3773_c2_g1	TRINITY_DN23523_c8_g1
OG0001705	NA	NA	DW	NA	NA	NA	NA	NA	NA	8	1	0	1	1	OG0001705	TRINITY_DN45866_c4_g1	TRINITY_DN16529_c12_g1	TRINITY_DN88870_c0_g1		TRINITY_DN20710_c1_g2	TRINITY_DN20966_c4_g4	TRINITY_DN8660_c0_g2	TRINITY_DN8905_c0_g1	TRINITY_DN16658_c0_g1
OG0001708	NA	NA	UP	NA	NA	NA	NA	NA	NA	8	0	1	1	1	OG0001708	TRINITY_DN4635_c0_g2	TRINITY_DN19017_c2_g2	TRINITY_DN38244_c0_g1	TRINITY_DN24542_c7_g1	TRINITY_DN24866_c1_g1	TRINITY_DN18539_c2_g1	TRINITY_DN20537_c3_g3	TRINITY_DN609_c2_g1	TRINITY_DN22709_c5_g1
OG0001715	NA	NA	UP	NA	NA	NA	NA	NA	NA	8	0	1	1	1	OG0001715	TRINITY_DN4786_c0_g2	TRINITY_DN19746_c8_g1	TRINITY_DN81266_c0_g1	TRINITY_DN24470_c12_g5	TRINITY_DN20534_c6_g1	TRINITY_DN16247_c7_g3		TRINITY_DN2740_c1_g1	TRINITY_DN20593_c5_g1
OG0001716	NA	NA	UP	NA	NA	NA	NA	NA	NA	8	0	1	1	1	OG0001716	TRINITY_DN4792_c0_g2	TRINITY_DN19682_c2_g1	TRINITY_DN47012_c3_g4		TRINITY_DN24156_c5_g1	TRINITY_DN20182_c9_g5	TRINITY_DN17596_c8_g2	TRINITY_DN1925_c1_g1	TRINITY_DN23287_c3_g3
OG0001728	NA	NA	NA	NA	NA	NA	NA	DW	NA	8	1	0	1	1	OG0001728	TRINITY_DN51_c0_g3	TRINITY_DN19484_c10_g2	TRINITY_DN43104_c1_g4	TRINITY_DN24685_c5_g1	TRINITY_DN22888_c1_g2	TRINITY_DN16165_c6_g1	TRINITY_DN20890_c6_g1		TRINITY_DN18994_c5_g1
OG0001732	DW	NA	NA	NA	NA	NA	NA	NA	NA	8	1	0	1	1	OG0001732	TRINITY_DN5274_c1_g2		TRINITY_DN41432_c8_g4	TRINITY_DN21800_c0_g5	TRINITY_DN22980_c9_g1	TRINITY_DN12718_c7_g1	TRINITY_DN20428_c3_g2	TRINITY_DN27270_c0_g1
OG0001746	DW	NA	NA	NA	NA	NA	NA	NA	NA	8	1	0	1	1	OG0001746	TRINITY_DN5646_c0_g1	TRINITY_DN17601_c1_g1	TRINITY_DN44934_c0_g1	TRINITY_DN23374_c5_g1	TRINITY_DN18591_c9_g2	TRINITY_DN20088_c4_g2	TRINITY_DN20701_c0_g2	TRINITY_DN5262_c0_g2	TRINITY_DN23622_c0_g1
OG0001754	NA	NA	NA	NA	NA	NA	UP	NA	NA	8	0	1	1	1	OG0001754	TRINITY_DN582_c3_g1	TRINITY_DN17962_c10_g2	TRINITY_DN36881_c0_g2	TRINITY_DN20979_c0_g1	TRINITY_DN24195_c3_g1	TRINITY_DN9845_c0_g2	TRINITY_DN13125_c0_g1	TRINITY_DN7275_c0_g1	TRINITY_DN20465_c4_g1
OG0001755	NA	NA	NA	NA	NA	NA	NA	UP	NA	8	0	1	1	1	OG0001755	TRINITY_DN585_c2_g4	TRINITY_DN19366_c5_g1	TRINITY_DN48659_c1_g1	TRINITY_DN23411_c1_g2	TRINITY_DN20373_c6_g1	TRINITY_DN16942_c2_g1	TRINITY_DN19039_c5_g1	TRINITY_DN3216_c2_g2	TRINITY_DN19620_c8_g3
OG0001760	NA	NA	UP	NA	NA	NA	NA	NA	NA	8	0	1	1	1	OG0001760	TRINITY_DN6087_c0_g1	TRINITY_DN18167_c5_g6	TRINITY_DN44961_c1_g1	TRINITY_DN21964_c0_g2	TRINITY_DN18625_c8_g1	TRINITY_DN13782_c8_g1	TRINITY_DN20578_c0_g2	TRINITY_DN9473_c9_g1	TRINITY_DN17535_c1_g1
OG0001763	NA	NA	DW	NA	NA	NA	NA	NA	NA	8	1	0	1	1	OG0001763	TRINITY_DN6254_c0_g2	TRINITY_DN17461_c6_g2	TRINITY_DN42458_c0_g1	TRINITY_DN21499_c0_g1	TRINITY_DN23059_c0_g2	TRINITY_DN13426_c0_g1	TRINITY_DN17698_c0_g1	TRINITY_DN1382_c1_g2	TRINITY_DN21522_c0_g1
OG0001777	NA	NA	DW	NA	NA	NA	NA	NA	NA	8	1	0	1	1	OG0001777	TRINITY_DN6827_c1_g1	TRINITY_DN16609_c0_g1	TRINITY_DN38905_c0_g1	TRINITY_DN22232_c4_g1	TRINITY_DN21119_c6_g1	TRINITY_DN18122_c6_g1	TRINITY_DN18948_c0_g1	TRINITY_DN948_c0_g1	TRINITY_DN19509_c8_g1
OG0001785	NA	NA	DW	NA	NA	NA	NA	NA	NA	8	1	0	1	1	OG0001785	TRINITY_DN7205_c5_g1	TRINITY_DN16550_c4_g19	TRINITY_DN35688_c0_g1	TRINITY_DN22070_c7_g12	TRINITY_DN20994_c5_g1	TRINITY_DN16341_c2_g3	TRINITY_DN18794_c3_g1	TRINITY_DN5036_c0_g2
OG0001789	NA	NA	DW	NA	NA	NA	NA	NA	NA	8	1	0	1	1	OG0001789	TRINITY_DN730_c1_g1	TRINITY_DN18647_c5_g1	TRINITY_DN37397_c0_g1	TRINITY_DN24658_c6_g2	TRINITY_DN24735_c4_g2	TRINITY_DN20806_c7_g1	TRINITY_DN20965_c2_g1	TRINITY_DN1393_c0_g1	TRINITY_DN23028_c9_g1
OG0001792	NA	NA	UP	NA	NA	NA	NA	NA	NA	8	0	1	1	1	OG0001792	TRINITY_DN7421_c0_g1	TRINITY_DN18769_c4_g1	TRINITY_DN38901_c0_g1	TRINITY_DN22066_c1_g2	TRINITY_DN17868_c0_g1	TRINITY_DN16742_c1_g3	TRINITY_DN10868_c0_g1	TRINITY_DN1989_c0_g1	TRINITY_DN18157_c9_g1
OG0001795	NA	NA	DW	NA	NA	NA	NA	NA	NA	8	1	0	1	1	OG0001795	TRINITY_DN751_c2_g2	TRINITY_DN18691_c3_g1	TRINITY_DN41823_c9_g1	TRINITY_DN22233_c7_g2	TRINITY_DN24854_c4_g2	TRINITY_DN21434_c8_g2	TRINITY_DN20350_c5_g1	TRINITY_DN2090_c1_g2	TRINITY_DN21377_c8_g4
OG0001796	NA	NA	UP	NA	NA	NA	NA	NA	NA	8	0	1	1	1	OG0001796	TRINITY_DN7596_c0_g1	TRINITY_DN19656_c0_g1	TRINITY_DN40090_c0_g1	TRINITY_DN20872_c0_g1	TRINITY_DN9317_c0_g1	TRINITY_DN12219_c0_g1	TRINITY_DN11840_c0_g1	TRINITY_DN349_c1_g2	TRINITY_DN21602_c2_g4
OG0001801	NA	NA	DW	NA	NA	NA	NA	NA	NA	8	1	0	1	1	OG0001801	TRINITY_DN7814_c1_g1	TRINITY_DN15481_c0_g1	TRINITY_DN11994_c0_g1	TRINITY_DN53934_c0_g1	TRINITY_DN18168_c3_g1	TRINITY_DN13030_c6_g1	TRINITY_DN16260_c0_g1	TRINITY_DN1394_c0_g1	TRINITY_DN23669_c11_g1
OG0001803	NA	NA	DW	NA	NA	NA	NA	NA	NA	8	1	0	1	1	OG0001803	TRINITY_DN7_c3_g1		TRINITY_DN39766_c0_g3	TRINITY_DN23076_c10_g1	TRINITY_DN22345_c6_g1	TRINITY_DN17157_c7_g1	TRINITY_DN20214_c4_g4	TRINITY_DN1337_c0_g2	TRINITY_DN14750_c0_g1
OG0001804	NA	NA	DW	NA	NA	NA	NA	NA	NA	8	1	0	1	1	OG0001804	TRINITY_DN7_c4_g1	TRINITY_DN18697_c2_g1	TRINITY_DN45754_c0_g1	TRINITY_DN21864_c8_g2	TRINITY_DN24903_c4_g1	TRINITY_DN20736_c7_g2	TRINITY_DN19049_c0_g2	TRINITY_DN1751_c0_g1	TRINITY_DN19063_c6_g3
OG0001808	NA	NA	NA	NA	NA	NA	NA	DW	NA	8	1	0	1	1	OG0001808	TRINITY_DN815_c0_g2	TRINITY_DN19160_c3_g2	TRINITY_DN48125_c5_g1	TRINITY_DN24797_c11_g1	TRINITY_DN25147_c8_g2	TRINITY_DN21113_c3_g2	TRINITY_DN20510_c1_g1		TRINITY_DN22025_c2_g1
OG0001822	NA	NA	UP	NA	NA	NA	NA	NA	NA	8	0	1	1	1	OG0001822	TRINITY_DN8760_c0_g2	TRINITY_DN17743_c1_g1	TRINITY_DN44530_c0_g3	TRINITY_DN21800_c0_g1	TRINITY_DN23724_c1_g1	TRINITY_DN12964_c4_g3	TRINITY_DN17879_c5_g1	TRINITY_DN338_c1_g2	TRINITY_DN18663_c4_g1
OG0001825	NA	NA	NA	NA	NA	NA	NA	DW	NA	8	1	0	1	1	OG0001825	TRINITY_DN880_c5_g1	TRINITY_DN35555_c0_g1	TRINITY_DN41931_c13_g3	TRINITY_DN22410_c2_g3	TRINITY_DN22827_c5_g2	TRINITY_DN21294_c7_g1	TRINITY_DN17811_c3_g2		TRINITY_DN17569_c0_g1
OG0001827	NA	NA	NA	NA	UP	NA	NA	NA	NA	8	0	1	1	1	OG0001827	TRINITY_DN8823_c6_g1	TRINITY_DN16287_c10_g6	TRINITY_DN41086_c0_g1	TRINITY_DN24446_c6_g6	TRINITY_DN21678_c5_g1	TRINITY_DN16919_c5_g6	TRINITY_DN18062_c8_g1	TRINITY_DN19777_c0_g1	TRINITY_DN18364_c0_g2
OG0001834	NA	NA	NA	NA	NA	NA	NA	UP	NA	8	0	1	1	1	OG0001834	TRINITY_DN8_c2_g1	TRINITY_DN19286_c1_g1	TRINITY_DN48224_c1_g1	TRINITY_DN23729_c2_g6	TRINITY_DN24383_c6_g3	TRINITY_DN19488_c5_g1	TRINITY_DN20015_c3_g1	TRINITY_DN975_c0_g1	TRINITY_DN22473_c5_g1
OG0001835	NA	NA	NA	NA	NA	NA	NA	DW	NA	8	1	0	1	1	OG0001835	TRINITY_DN973_c10_g7	TRINITY_DN17040_c10_g11	TRINITY_DN46151_c6_g4	TRINITY_DN24757_c10_g1	TRINITY_DN20172_c5_g2	TRINITY_DN15413_c1_g1	TRINITY_DN20106_c2_g1
OG0001837	NA	NA	NA	NA	UP	NA	NA	NA	NA	8	0	1	1	1	OG0001837	TRINITY_DN906_c2_g2	TRINITY_DN18568_c3_g3	TRINITY_DN44693_c0_g1	TRINITY_DN21799_c9_g1	TRINITY_DN21176_c5_g1	TRINITY_DN19060_c0_g1	TRINITY_DN16860_c0_g1	TRINITY_DN2976_c1_g2	TRINITY_DN7178_c0_g1
OG0001838	NA	NA	NA	NA	NA	NA	NA	UP	NA	8	0	1	1	1	OG0001838	TRINITY_DN9073_c0_g1	TRINITY_DN28211_c0_g1	TRINITY_DN68699_c0_g1	TRINITY_DN16670_c0_g1	TRINITY_DN526_c0_g1	TRINITY_DN17634_c5_g1	TRINITY_DN37953_c0_g1	TRINITY_DN9316_c1_g1	TRINITY_DN20034_c5_g3
OG0001841	NA	NA	NA	NA	NA	NA	NA	UP	NA	8	0	1	1	1	OG0001841	TRINITY_DN929_c6_g1	TRINITY_DN16551_c4_g2	TRINITY_DN42183_c0_g1	TRINITY_DN23254_c8_g4	TRINITY_DN25376_c6_g1	TRINITY_DN17768_c3_g2	TRINITY_DN17106_c0_g1	TRINITY_DN226_c0_g2	TRINITY_DN19584_c4_g2
OG0001844	NA	NA	DW	NA	NA	NA	NA	NA	NA	8	1	0	1	1	OG0001844	TRINITY_DN9386_c0_g4	TRINITY_DN18035_c6_g3	TRINITY_DN42274_c3_g2	TRINITY_DN21571_c2_g1	TRINITY_DN18561_c0_g1	TRINITY_DN14676_c10_g1	TRINITY_DN17993_c4_g1	TRINITY_DN2739_c0_g1	TRINITY_DN23848_c9_g3
OG0001848	NA	NA	NA	NA	NA	NA	NA	DW	NA	8	1	0	1	1	OG0001848	TRINITY_DN956_c0_g2	TRINITY_DN18523_c0_g1	TRINITY_DN40454_c0_g2	TRINITY_DN22671_c4_g1	TRINITY_DN21015_c3_g1	TRINITY_DN15362_c6_g2	TRINITY_DN16406_c0_g1		TRINITY_DN20650_c8_g3
OG0001849	NA	NA	DW	NA	NA	NA	NA	NA	NA	8	1	0	1	1	OG0001849	TRINITY_DN961_c3_g2	TRINITY_DN17005_c8_g1	TRINITY_DN42661_c6_g1	TRINITY_DN23037_c11_g1	TRINITY_DN24821_c2_g1	TRINITY_DN13242_c5_g1	TRINITY_DN19109_c4_g1	TRINITY_DN576_c1_g2	TRINITY_DN23510_c6_g2
OG0001862	NA	NA	DW	NA	NA	NA	NA	NA	NA	8	1	0	1	1	OG0001862		TRINITY_DN17255_c6_g1	TRINITY_DN40104_c0_g1	TRINITY_DN22942_c7_g17		TRINITY_DN12059_c0_g2	TRINITY_DN16574_c0_g1	TRINITY_DN7998_c0_g1	TRINITY_DN21970_c7_g1
OG0001867	NA	NA	DW	NA	NA	NA	NA	NA	NA	8	1	0	1	1	OG0001867		TRINITY_DN14891_c0_g1	TRINITY_DN52075_c0_g1	TRINITY_DN1314_c0_g2	TRINITY_DN30376_c0_g1	TRINITY_DN11725_c0_g2	TRINITY_DN14837_c0_g2	TRINITY_DN113_c2_g2	TRINITY_DN23629_c8_g1
OG0001869	NA	NA	NA	NA	NA	NA	DW	NA	NA	8	1	0	1	1	OG0001869		TRINITY_DN32679_c0_g1	TRINITY_DN48055_c0_g1	TRINITY_DN22159_c3_g5	TRINITY_DN33221_c0_g1	TRINITY_DN12158_c0_g1	TRINITY_DN17445_c0_g2	TRINITY_DN2340_c1_g1
OG0001871	NA	NA	DW	NA	NA	NA	NA	NA	NA	8	1	0	1	1	OG0001871		TRINITY_DN16492_c3_g5	TRINITY_DN46901_c3_g7	TRINITY_DN24689_c2_g6	TRINITY_DN22571_c4_g7	TRINITY_DN13563_c2_g1	TRINITY_DN18475_c1_g7	TRINITY_DN26_c8_g1	TRINITY_DN18833_c9_g3
OG0001872	NA	NA	NA	NA	UP	NA	NA	NA	NA	8	0	1	1	1	OG0001872		TRINITY_DN17059_c1_g2	TRINITY_DN43533_c12_g1	TRINITY_DN24918_c0_g1	TRINITY_DN18836_c3_g1	TRINITY_DN18804_c3_g7	TRINITY_DN19658_c2_g1	TRINITY_DN906_c2_g2	TRINITY_DN19085_c3_g4
OG0001875	NA	NA	NA	NA	NA	NA	NA	DW	NA	8	1	0	1	1	OG0001875		TRINITY_DN18767_c7_g1	TRINITY_DN44611_c4_g1	TRINITY_DN22599_c9_g4	TRINITY_DN22299_c3_g1	TRINITY_DN13565_c5_g1	TRINITY_DN21329_c5_g2		TRINITY_DN21779_c3_g2
OG0001882	NA	NA	UP	NA	NA	NA	NA	NA	NA	8	0	1	1	1	OG0001882		TRINITY_DN18425_c8_g4	TRINITY_DN45588_c3_g1	TRINITY_DN22500_c7_g1	TRINITY_DN17660_c0_g1	TRINITY_DN11984_c0_g1	TRINITY_DN1033_c0_g1	TRINITY_DN34419_c1_g1	TRINITY_DN19835_c2_g4
OG0001885	NA	NA	DW	NA	NA	NA	NA	NA	NA	8	1	0	1	1	OG0001885		TRINITY_DN18623_c7_g1	TRINITY_DN40246_c0_g1	TRINITY_DN22788_c15_g1	TRINITY_DN22925_c1_g1	TRINITY_DN17548_c1_g1	TRINITY_DN19179_c9_g1	TRINITY_DN2865_c1_g2	TRINITY_DN21361_c2_g1
OG0001889	NA	NA	UP	NA	NA	NA	NA	NA	NA	8	0	1	1	1	OG0001889		TRINITY_DN19796_c0_g1	TRINITY_DN48486_c2_g1	TRINITY_DN22488_c0_g5		TRINITY_DN12192_c12_g2	TRINITY_DN17774_c1_g3	TRINITY_DN2768_c1_g1	TRINITY_DN22027_c9_g1
OG0001890	NA	NA	UP	NA	NA	NA	NA	NA	NA	8	0	1	1	1	OG0001890		TRINITY_DN20065_c0_g1	TRINITY_DN53634_c0_g1	TRINITY_DN61399_c0_g1	TRINITY_DN35643_c0_g1	TRINITY_DN9084_c0_g1		TRINITY_DN10283_c0_g1	TRINITY_DN17836_c0_g1
OG0001895	NA	NA	DW	NA	NA	NA	NA	NA	NA	8	1	0	1	1	OG0001895		TRINITY_DN32573_c0_g1	TRINITY_DN60538_c0_g1	TRINITY_DN26785_c0_g1	TRINITY_DN10197_c0_g1	TRINITY_DN12629_c3_g1	TRINITY_DN23713_c0_g1	TRINITY_DN12216_c0_g1	TRINITY_DN19291_c4_g3
OG0001897	NA	NA	DW	NA	NA	NA	NA	NA	NA	8	1	0	1	1	OG0001897		TRINITY_DN35690_c0_g1	TRINITY_DN85510_c0_g1	TRINITY_DN11198_c0_g1	TRINITY_DN23433_c3_g1	TRINITY_DN15842_c3_g1	TRINITY_DN11494_c0_g1	TRINITY_DN14686_c3_g1	TRINITY_DN20118_c6_g2
OG0001906	NA	NA	DW	NA	NA	NA	NA	NA	NA	8	1	0	1	1	OG0001906			TRINITY_DN34109_c0_g1	TRINITY_DN15269_c0_g1	TRINITY_DN49230_c0_g1	TRINITY_DN24136_c0_g1	TRINITY_DN12001_c0_g1	TRINITY_DN851_c0_g2	TRINITY_DN16185_c0_g1
OG0001917	NA	NA	DW	NA	NA	NA	NA	NA	NA	8	1	0	1	1	OG0001917	TRINITY_DN10054_c0_g1	TRINITY_DN19057_c4_g2	TRINITY_DN46545_c0_g1	TRINITY_DN23261_c7_g1	TRINITY_DN24185_c4_g1	TRINITY_DN21155_c4_g1	TRINITY_DN18122_c3_g1	TRINITY_DN629_c0_g2	TRINITY_DN23329_c7_g1
OG0001925	NA	NA	UP	NA	NA	NA	NA	NA	NA	8	0	1	1	1	OG0001925	TRINITY_DN1042_c1_g1	TRINITY_DN18489_c1_g3	TRINITY_DN47302_c1_g1	TRINITY_DN24049_c2_g1	TRINITY_DN24807_c0_g1	TRINITY_DN17712_c5_g1	TRINITY_DN17656_c8_g1	TRINITY_DN1057_c1_g2	TRINITY_DN20721_c7_g1
OG0001927	NA	NA	UP	NA	NA	NA	NA	NA	NA	8	0	1	1	1	OG0001927	TRINITY_DN1048_c4_g2	TRINITY_DN18931_c5_g1	TRINITY_DN40887_c0_g2	TRINITY_DN21312_c0_g1	TRINITY_DN19135_c0_g1	TRINITY_DN18747_c3_g1	TRINITY_DN17149_c0_g1	TRINITY_DN1314_c0_g1	TRINITY_DN20610_c0_g1
OG0001950	NA	NA	NA	NA	NA	NA	NA	DW	NA	8	1	0	1	1	OG0001950	TRINITY_DN11261_c0_g2	TRINITY_DN17926_c4_g4	TRINITY_DN42191_c4_g1	TRINITY_DN22959_c1_g1	TRINITY_DN21762_c6_g1	TRINITY_DN15393_c6_g1	TRINITY_DN18757_c2_g2
OG0001957	NA	NA	NA	NA	NA	NA	NA	DW	NA	8	1	0	1	1	OG0001957	TRINITY_DN11497_c6_g1	TRINITY_DN18399_c4_g1	TRINITY_DN44168_c6_g1	TRINITY_DN24072_c7_g1	TRINITY_DN19677_c13_g1	TRINITY_DN13471_c4_g4	TRINITY_DN17849_c4_g4		TRINITY_DN19573_c6_g1
OG0001971	NA	NA	NA	NA	NA	NA	NA	DW	NA	8	1	0	1	1	OG0001971	TRINITY_DN120_c1_g2	TRINITY_DN16696_c7_g2	TRINITY_DN42809_c2_g1	TRINITY_DN22014_c5_g5	TRINITY_DN21307_c5_g2	TRINITY_DN18394_c10_g1	TRINITY_DN18326_c5_g1		TRINITY_DN19535_c6_g6
OG0001974	NA	NA	UP	NA	NA	NA	NA	NA	NA	8	0	1	1	1	OG0001974	TRINITY_DN12150_c1_g1	TRINITY_DN11601_c0_g1	TRINITY_DN91859_c0_g1	TRINITY_DN46423_c0_g1	TRINITY_DN6280_c0_g1	TRINITY_DN15752_c6_g2	TRINITY_DN13932_c0_g1	TRINITY_DN9750_c5_g1	TRINITY_DN18719_c2_g1
OG0001975	NA	NA	DW	NA	NA	NA	NA	NA	NA	8	1	0	1	1	OG0001975	TRINITY_DN12162_c1_g1	TRINITY_DN18115_c5_g1	TRINITY_DN40095_c0_g2	TRINITY_DN20775_c0_g1	TRINITY_DN17699_c0_g1	TRINITY_DN15564_c5_g2	TRINITY_DN17539_c8_g2	TRINITY_DN3986_c0_g1	TRINITY_DN21472_c8_g2
OG0001980	NA	NA	NA	NA	NA	NA	NA	DW	NA	8	1	0	1	1	OG0001980	TRINITY_DN121_c6_g1	TRINITY_DN16598_c8_g2	TRINITY_DN46742_c7_g1	TRINITY_DN24280_c3_g1	TRINITY_DN23648_c4_g4	TRINITY_DN14439_c5_g3	TRINITY_DN20417_c5_g1		TRINITY_DN18514_c6_g1
OG0001987	NA	NA	NA	NA	NA	NA	NA	DW	NA	8	1	0	1	1	OG0001987	TRINITY_DN125_c1_g1	TRINITY_DN18399_c6_g1	TRINITY_DN48774_c3_g1	TRINITY_DN24878_c5_g1	TRINITY_DN24943_c5_g1	TRINITY_DN18772_c7_g2	TRINITY_DN20253_c5_g2		TRINITY_DN21446_c7_g2
OG0001992	NA	NA	UP	NA	NA	NA	NA	NA	NA	8	0	1	1	1	OG0001992	TRINITY_DN31941_c0_g1	TRINITY_DN18505_c0_g1	TRINITY_DN24356_c0_g1	TRINITY_DN23155_c5_g2			TRINITY_DN6343_c0_g1	TRINITY_DN1326_c0_g1	TRINITY_DN18615_c1_g1
OG0001994	NA	NA	UP	NA	NA	NA	NA	NA	NA	8	0	1	1	1	OG0001994	TRINITY_DN1271_c1_g1	TRINITY_DN17118_c3_g1	TRINITY_DN48806_c6_g1	TRINITY_DN23445_c11_g1	TRINITY_DN22042_c7_g1	TRINITY_DN12699_c5_g3	TRINITY_DN20105_c3_g1	TRINITY_DN3014_c0_g3	TRINITY_DN23342_c5_g2
OG0001995	NA	NA	DW	NA	NA	NA	NA	NA	NA	8	1	0	1	1	OG0001995	TRINITY_DN1275_c0_g2	TRINITY_DN18338_c2_g1	TRINITY_DN35561_c0_g1	TRINITY_DN22105_c8_g1	TRINITY_DN24638_c4_g1	TRINITY_DN19389_c2_g2	TRINITY_DN19687_c7_g1	TRINITY_DN323_c0_g2	TRINITY_DN21370_c3_g1
OG0001997	NA	NA	NA	NA	UP	NA	NA	NA	NA	8	0	1	1	1	OG0001997	TRINITY_DN12771_c0_g1	TRINITY_DN19730_c9_g6	TRINITY_DN11473_c0_g1	TRINITY_DN19189_c0_g1	TRINITY_DN22504_c1_g2	TRINITY_DN17667_c1_g1	TRINITY_DN17672_c11_g3	TRINITY_DN68123_c1_g1	TRINITY_DN19434_c7_g1
OG0002004	NA	NA	NA	NA	NA	NA	NA	DW	NA	8	1	0	1	1	OG0002004	TRINITY_DN1299_c4_g3	TRINITY_DN18218_c7_g9	TRINITY_DN41637_c12_g3	TRINITY_DN24208_c5_g3	TRINITY_DN20024_c6_g1	TRINITY_DN19030_c3_g4	TRINITY_DN20278_c1_g2
OG0002005	NA	NA	UP	NA	NA	NA	NA	NA	NA	8	0	1	1	1	OG0002005	TRINITY_DN1306_c1_g1	TRINITY_DN16525_c5_g3	TRINITY_DN48243_c0_g1	TRINITY_DN23695_c4_g4	TRINITY_DN24136_c6_g1	TRINITY_DN19610_c7_g1	TRINITY_DN19817_c11_g1	TRINITY_DN4537_c0_g1	TRINITY_DN22206_c3_g2
OG0002006	NA	NA	DW	NA	NA	NA	NA	NA	NA	8	1	0	1	1	OG0002006	TRINITY_DN13073_c1_g1	TRINITY_DN16607_c1_g2	TRINITY_DN85942_c0_g1	TRINITY_DN30743_c0_g1		TRINITY_DN14672_c8_g3	TRINITY_DN17808_c2_g2	TRINITY_DN19079_c1_g2	TRINITY_DN20149_c6_g1
OG0002021	NA	NA	DW	NA	NA	NA	NA	NA	NA	8	1	0	1	1	OG0002021	TRINITY_DN13673_c0_g2	TRINITY_DN19536_c1_g1	TRINITY_DN44816_c2_g2	TRINITY_DN23405_c7_g2	TRINITY_DN22010_c7_g1	TRINITY_DN19934_c2_g1	TRINITY_DN20362_c9_g1	TRINITY_DN1058_c0_g1	TRINITY_DN19438_c4_g1
OG0002022	NA	NA	DW	NA	NA	NA	NA	NA	NA	8	1	0	1	1	OG0002022	TRINITY_DN1369_c2_g1	TRINITY_DN17978_c1_g2	TRINITY_DN40177_c0_g2	TRINITY_DN21090_c0_g1	TRINITY_DN21434_c7_g1	TRINITY_DN15589_c4_g1	TRINITY_DN18033_c8_g1	TRINITY_DN3017_c0_g1	TRINITY_DN20773_c4_g2
OG0002033	NA	DW	NA	NA	NA	NA	NA	NA	NA	8	1	0	1	1	OG0002033	TRINITY_DN14190_c0_g1	TRINITY_DN21067_c0_g1	TRINITY_DN39539_c0_g1	TRINITY_DN17169_c0_g1	TRINITY_DN23402_c1_g4	TRINITY_DN18957_c6_g1	TRINITY_DN16227_c0_g1	TRINITY_DN5245_c0_g1	TRINITY_DN4626_c0_g1
OG0002037	NA	NA	DW	NA	NA	NA	NA	NA	NA	8	1	0	1	1	OG0002037	TRINITY_DN1425_c1_g1	TRINITY_DN16447_c9_g1	TRINITY_DN43191_c9_g2	TRINITY_DN21103_c1_g1	TRINITY_DN18352_c7_g2	TRINITY_DN17896_c7_g1	TRINITY_DN15278_c0_g1	TRINITY_DN1080_c1_g1	TRINITY_DN19586_c0_g1
OG0002044	NA	NA	NA	NA	NA	NA	NA	UP	NA	8	0	1	1	1	OG0002044	TRINITY_DN1459_c0_g1	TRINITY_DN18551_c0_g5		TRINITY_DN22408_c7_g1	TRINITY_DN23477_c6_g1	TRINITY_DN18060_c4_g1	TRINITY_DN19961_c4_g2	TRINITY_DN328_c1_g1	TRINITY_DN18887_c5_g3
OG0002046	NA	NA	UP	NA	NA	NA	NA	NA	NA	8	0	1	1	1	OG0002046	TRINITY_DN14640_c0_g2	TRINITY_DN18675_c1_g1	TRINITY_DN44537_c0_g1	TRINITY_DN20624_c0_g1	TRINITY_DN18717_c3_g1	TRINITY_DN12451_c0_g1	TRINITY_DN17427_c0_g2	TRINITY_DN2544_c1_g2	TRINITY_DN18589_c2_g2
OG0002054	NA	NA	UP	NA	NA	NA	NA	NA	NA	8	0	1	1	1	OG0002054	TRINITY_DN1500_c0_g2	TRINITY_DN16802_c5_g5	TRINITY_DN43868_c0_g1	TRINITY_DN24853_c4_g2	TRINITY_DN24233_c6_g1	TRINITY_DN21123_c6_g1	TRINITY_DN18886_c2_g9	TRINITY_DN1347_c0_g2	TRINITY_DN18407_c9_g3
OG0002056	NA	NA	UP	NA	NA	NA	NA	NA	NA	8	0	1	1	1	OG0002056	TRINITY_DN15134_c1_g1	TRINITY_DN17155_c10_g1	TRINITY_DN52940_c0_g1	TRINITY_DN20638_c0_g1	TRINITY_DN18357_c0_g1	TRINITY_DN15212_c1_g3	TRINITY_DN20504_c1_g1	TRINITY_DN3597_c4_g1	TRINITY_DN21764_c4_g1
OG0002059	NA	NA	NA	NA	UP	NA	NA	NA	NA	8	0	1	1	1	OG0002059	TRINITY_DN15361_c1_g1	TRINITY_DN17381_c6_g2	TRINITY_DN44296_c4_g1	TRINITY_DN23509_c6_g1	TRINITY_DN19409_c4_g1		TRINITY_DN17563_c2_g2	TRINITY_DN2508_c1_g1	TRINITY_DN18889_c9_g2
OG0002065	NA	NA	DW	NA	NA	NA	NA	NA	NA	8	1	0	1	1	OG0002065	TRINITY_DN154_c0_g1	TRINITY_DN19136_c3_g3	TRINITY_DN48901_c10_g2	TRINITY_DN22787_c1_g2	TRINITY_DN24286_c2_g1	TRINITY_DN21323_c6_g1	TRINITY_DN20607_c6_g2	TRINITY_DN1214_c0_g1	TRINITY_DN18790_c10_g1
OG0002070	NA	NA	NA	NA	NA	NA	NA	DW	NA	8	1	0	1	1	OG0002070	TRINITY_DN1560_c10_g1	TRINITY_DN43239_c0_g1	TRINITY_DN39485_c0_g1	TRINITY_DN22347_c11_g1		TRINITY_DN12401_c6_g1	TRINITY_DN17022_c0_g2		TRINITY_DN51632_c0_g1
OG0002071	NA	NA	UP	NA	NA	NA	NA	NA	NA	8	0	1	1	1	OG0002071	TRINITY_DN15650_c13_g1	TRINITY_DN1502_c0_g2	TRINITY_DN43733_c8_g2	TRINITY_DN23303_c7_g4	TRINITY_DN22050_c6_g1	TRINITY_DN12319_c4_g7	TRINITY_DN34393_c0_g1	TRINITY_DN24401_c0_g1	TRINITY_DN18293_c6_g6
OG0002074	UP	NA	NA	NA	NA	NA	NA	NA	NA	8	0	1	1	1	OG0002074	TRINITY_DN1575_c2_g1	TRINITY_DN18421_c5_g2	TRINITY_DN46239_c0_g1	TRINITY_DN23138_c9_g2	TRINITY_DN25337_c7_g1	TRINITY_DN20415_c1_g4	TRINITY_DN19593_c10_g1	TRINITY_DN1688_c2_g2	TRINITY_DN19181_c5_g1
OG0002080	NA	NA	UP	NA	NA	NA	NA	NA	NA	8	0	1	1	1	OG0002080	TRINITY_DN16238_c0_g1	TRINITY_DN17945_c8_g1	TRINITY_DN47587_c11_g1	TRINITY_DN24437_c4_g1	TRINITY_DN22138_c1_g1	TRINITY_DN13477_c8_g1	TRINITY_DN21000_c5_g2	TRINITY_DN2717_c0_g4	TRINITY_DN21153_c8_g1
OG0002081	NA	NA	NA	NA	NA	NA	NA	NA	DW	8	1	0	1	1	OG0002081	TRINITY_DN16349_c0_g2		TRINITY_DN48440_c0_g1	TRINITY_DN22097_c5_g1	TRINITY_DN20343_c1_g1	TRINITY_DN19590_c6_g1	TRINITY_DN17320_c0_g2	TRINITY_DN550_c1_g1	TRINITY_DN20125_c0_g2
OG0002083	UP	NA	NA	NA	NA	NA	NA	NA	NA	8	0	1	1	1	OG0002083	TRINITY_DN16436_c0_g2	TRINITY_DN16968_c8_g4	TRINITY_DN40831_c0_g1	TRINITY_DN20296_c0_g1	TRINITY_DN24452_c4_g4	TRINITY_DN13991_c7_g1	TRINITY_DN16908_c0_g1	TRINITY_DN6167_c0_g2	TRINITY_DN22676_c1_g2
OG0002087	NA	NA	DW	NA	NA	NA	NA	NA	NA	8	1	0	1	1	OG0002087	TRINITY_DN16617_c0_g2	TRINITY_DN17440_c9_g1	TRINITY_DN77095_c0_g1	TRINITY_DN20472_c0_g1	TRINITY_DN20706_c2_g1	TRINITY_DN13657_c4_g1	TRINITY_DN17081_c0_g1	TRINITY_DN1271_c0_g1	TRINITY_DN21646_c0_g1
OG0002097	NA	DW	NA	NA	NA	NA	NA	NA	NA	8	1	0	1	1	OG0002097	TRINITY_DN16_c5_g2	TRINITY_DN15559_c1_g1	TRINITY_DN47417_c0_g2		TRINITY_DN22811_c2_g1		TRINITY_DN19582_c4_g1	TRINITY_DN494_c0_g1	TRINITY_DN18620_c7_g1
OG0002099	NA	NA	NA	NA	NA	NA	NA	DW	NA	8	1	0	1	1	OG0002099	TRINITY_DN172_c1_g4	TRINITY_DN18297_c3_g1	TRINITY_DN46648_c6_g6	TRINITY_DN23873_c3_g2	TRINITY_DN22998_c3_g1	TRINITY_DN18260_c8_g2	TRINITY_DN20943_c3_g1		TRINITY_DN20670_c2_g1
OG0002106	NA	NA	NA	DW	NA	NA	NA	NA	NA	8	1	0	1	1	OG0002106	TRINITY_DN17733_c0_g1	TRINITY_DN15981_c0_g1	TRINITY_DN42745_c0_g1	TRINITY_DN24855_c4_g1	TRINITY_DN17958_c0_g1	TRINITY_DN16298_c0_g1	TRINITY_DN19975_c9_g3	TRINITY_DN1572_c0_g1	TRINITY_DN18504_c5_g1
OG0002107	NA	NA	UP	NA	NA	NA	NA	NA	NA	8	0	1	1	1	OG0002107	TRINITY_DN17761_c3_g1	TRINITY_DN19020_c9_g1	TRINITY_DN62163_c0_g1	TRINITY_DN11005_c0_g1	TRINITY_DN17367_c0_g1	TRINITY_DN15023_c5_g1	TRINITY_DN19364_c4_g2	TRINITY_DN5237_c0_g1	TRINITY_DN19549_c2_g1
OG0002117	NA	NA	NA	NA	NA	NA	NA	UP	NA	8	0	1	1	1	OG0002117	TRINITY_DN182_c2_g3	TRINITY_DN18312_c8_g10	TRINITY_DN46454_c5_g1	TRINITY_DN22033_c6_g1	TRINITY_DN23444_c6_g2	TRINITY_DN16027_c10_g1	TRINITY_DN20722_c7_g1	TRINITY_DN1802_c4_g1	TRINITY_DN23421_c12_g2
OG0002121	NA	NA	NA	NA	UP	NA	NA	NA	NA	8	0	1	1	1	OG0002121	TRINITY_DN18710_c2_g1	TRINITY_DN22661_c0_g1	TRINITY_DN1385_c0_g1	TRINITY_DN49297_c0_g1	TRINITY_DN21628_c5_g2	TRINITY_DN13988_c5_g1	TRINITY_DN9130_c0_g1	TRINITY_DN299_c0_g2
OG0002123	NA	NA	DW	NA	NA	NA	NA	NA	NA	8	1	0	1	1	OG0002123	TRINITY_DN187_c1_g3		TRINITY_DN38931_c0_g1	TRINITY_DN23315_c8_g8	TRINITY_DN24910_c0_g1	TRINITY_DN17564_c5_g1	TRINITY_DN21319_c3_g1	TRINITY_DN4253_c1_g2	TRINITY_DN20952_c6_g2
OG0002124	NA	NA	UP	NA	NA	NA	NA	NA	NA	8	0	1	1	1	OG0002124	TRINITY_DN18866_c3_g1	TRINITY_DN19615_c1_g1	TRINITY_DN42161_c0_g1	TRINITY_DN20846_c0_g1	TRINITY_DN17504_c0_g1	TRINITY_DN11519_c0_g1	TRINITY_DN19565_c3_g1	TRINITY_DN2612_c0_g2	TRINITY_DN22668_c8_g1
OG0002127	NA	NA	UP	NA	NA	NA	NA	NA	NA	8	0	1	1	1	OG0002127	TRINITY_DN18972_c2_g1	TRINITY_DN14646_c0_g1	TRINITY_DN82318_c0_g1	TRINITY_DN43081_c0_g1	TRINITY_DN19687_c2_g2	TRINITY_DN12252_c7_g1	TRINITY_DN10496_c0_g1	TRINITY_DN2237_c1_g1	TRINITY_DN23664_c1_g5
OG0002128	NA	NA	NA	NA	NA	NA	NA	DW	NA	8	1	0	1	1	OG0002128	TRINITY_DN18977_c0_g2	TRINITY_DN18263_c1_g2	TRINITY_DN44017_c0_g1	TRINITY_DN23716_c4_g1	TRINITY_DN24884_c5_g1	TRINITY_DN18966_c3_g1	TRINITY_DN17158_c0_g1		TRINITY_DN59178_c0_g1
OG0002132	NA	NA	NA	NA	UP	NA	NA	NA	NA	8	0	1	1	1	OG0002132	TRINITY_DN1919_c0_g1	TRINITY_DN16638_c6_g2	TRINITY_DN41435_c0_g1	TRINITY_DN22013_c8_g1	TRINITY_DN17655_c0_g1	TRINITY_DN16049_c1_g1	TRINITY_DN16798_c0_g1	TRINITY_DN5431_c0_g3	TRINITY_DN21264_c5_g1
OG0002137	DW	NA	NA	NA	NA	NA	NA	NA	NA	8	1	0	1	1	OG0002137	TRINITY_DN1941_c3_g6	TRINITY_DN18553_c1_g3	TRINITY_DN47522_c1_g1	TRINITY_DN23112_c4_g6	TRINITY_DN20085_c3_g3	TRINITY_DN20954_c8_g1	TRINITY_DN20918_c2_g4	TRINITY_DN4747_c0_g1	TRINITY_DN20585_c2_g1
OG0002138	NA	NA	DW	NA	NA	NA	NA	NA	NA	8	1	0	1	1	OG0002138	TRINITY_DN1947_c0_g2	TRINITY_DN15802_c0_g1	TRINITY_DN20274_c0_g1	TRINITY_DN20676_c0_g1	TRINITY_DN20680_c5_g1	TRINITY_DN20181_c7_g1	TRINITY_DN17012_c0_g1	TRINITY_DN5759_c0_g1	TRINITY_DN18607_c1_g1
OG0002144	NA	NA	NA	NA	NA	NA	NA	DW	NA	8	1	0	1	1	OG0002144	TRINITY_DN19613_c0_g2	TRINITY_DN16267_c1_g3	TRINITY_DN45898_c1_g1	TRINITY_DN23850_c6_g2	TRINITY_DN20338_c3_g1	TRINITY_DN13348_c13_g1	TRINITY_DN18739_c2_g4		TRINITY_DN18759_c14_g1
OG0002147	DW	NA	NA	NA	NA	NA	NA	NA	NA	8	1	0	1	1	OG0002147	TRINITY_DN196_c22_g1	TRINITY_DN19683_c10_g3	TRINITY_DN43113_c3_g1	TRINITY_DN23023_c1_g5	TRINITY_DN20821_c8_g1	TRINITY_DN18275_c1_g1	TRINITY_DN17582_c13_g1	TRINITY_DN24416_c0_g1	TRINITY_DN22261_c6_g1
OG0002148	NA	NA	UP	NA	NA	NA	NA	NA	NA	8	0	1	1	1	OG0002148	TRINITY_DN3459_c2_g1	TRINITY_DN17723_c2_g2	TRINITY_DN45035_c6_g1	TRINITY_DN22198_c6_g1	TRINITY_DN23464_c10_g3	TRINITY_DN20198_c10_g1	TRINITY_DN18708_c2_g1	TRINITY_DN12483_c0_g2	TRINITY_DN19248_c6_g1
OG0002153	NA	NA	UP	NA	NA	NA	NA	NA	NA	8	0	1	1	1	OG0002153	TRINITY_DN2016_c1_g1	TRINITY_DN17966_c1_g1	TRINITY_DN45631_c13_g5	TRINITY_DN24216_c4_g2	TRINITY_DN23698_c3_g2	TRINITY_DN20021_c7_g1	TRINITY_DN19235_c3_g1	TRINITY_DN1155_c4_g2	TRINITY_DN20509_c4_g1
OG0002154	NA	NA	NA	DW	NA	NA	NA	NA	NA	8	1	0	1	1	OG0002154	TRINITY_DN201_c0_g2	TRINITY_DN16295_c0_g1	TRINITY_DN44219_c0_g1	TRINITY_DN54322_c0_g1	TRINITY_DN18899_c4_g1		TRINITY_DN17929_c1_g4	TRINITY_DN616_c0_g2	TRINITY_DN22348_c0_g1
OG0002157	UP	NA	NA	NA	NA	NA	NA	NA	NA	8	0	1	1	1	OG0002157	TRINITY_DN20352_c11_g1	TRINITY_DN3410_c0_g1	TRINITY_DN22715_c0_g1	TRINITY_DN34026_c0_g1	TRINITY_DN19630_c4_g1	TRINITY_DN21523_c0_g1	TRINITY_DN19274_c3_g1	TRINITY_DN1848_c3_g1	TRINITY_DN20126_c7_g3
OG0002161	NA	NA	UP	NA	NA	NA	NA	NA	NA	8	0	1	1	1	OG0002161	TRINITY_DN2063_c0_g3	TRINITY_DN17461_c7_g1	TRINITY_DN42650_c4_g2	TRINITY_DN21191_c0_g2	TRINITY_DN21436_c1_g1	TRINITY_DN13099_c5_g1	TRINITY_DN19860_c2_g2	TRINITY_DN28383_c0_g1	TRINITY_DN21101_c1_g1
OG0002168	NA	NA	NA	NA	NA	NA	NA	DW	NA	8	1	0	1	1	OG0002168	TRINITY_DN2113_c0_g1	TRINITY_DN19795_c8_g2	TRINITY_DN47233_c7_g1	TRINITY_DN22161_c6_g2	TRINITY_DN23777_c4_g1	TRINITY_DN12356_c8_g1	TRINITY_DN21369_c3_g1		TRINITY_DN21593_c4_g1
OG0002169	NA	NA	UP	NA	NA	NA	NA	NA	NA	8	0	1	1	1	OG0002169	TRINITY_DN2129_c0_g2	TRINITY_DN17016_c6_g2	TRINITY_DN41400_c0_g1	TRINITY_DN23699_c1_g1	TRINITY_DN23363_c9_g1	TRINITY_DN19282_c6_g1	TRINITY_DN20412_c1_g1	TRINITY_DN2838_c0_g1	TRINITY_DN23576_c8_g1
OG0002173	NA	NA	UP	NA	NA	NA	NA	NA	NA	8	0	1	1	1	OG0002173	TRINITY_DN214_c9_g1	TRINITY_DN17111_c3_g1	TRINITY_DN47041_c3_g3	TRINITY_DN24426_c7_g1	TRINITY_DN19529_c8_g2	TRINITY_DN16635_c4_g1	TRINITY_DN18318_c5_g4	TRINITY_DN1441_c0_g1	TRINITY_DN19276_c5_g1
OG0002176	NA	NA	UP	NA	NA	NA	NA	NA	NA	8	0	1	1	1	OG0002176	TRINITY_DN21645_c2_g1	TRINITY_DN1538_c0_g1	TRINITY_DN40006_c0_g1	TRINITY_DN22593_c5_g1	TRINITY_DN24342_c7_g2	TRINITY_DN18477_c10_g1	TRINITY_DN19519_c0_g2	TRINITY_DN37234_c0_g1	TRINITY_DN23476_c2_g3
OG0002182	NA	NA	NA	NA	NA	NA	NA	DW	NA	8	1	0	1	1	OG0002182	TRINITY_DN2205_c0_g1	TRINITY_DN41540_c0_g1	TRINITY_DN48311_c4_g1		TRINITY_DN21404_c5_g2	TRINITY_DN20386_c9_g3	TRINITY_DN18991_c4_g3		TRINITY_DN23217_c2_g1
OG0002192	NA	NA	UP	NA	NA	NA	NA	NA	NA	8	0	1	1	1	OG0002192	TRINITY_DN2247_c1_g2	TRINITY_DN17020_c3_g4	TRINITY_DN46609_c5_g2	TRINITY_DN24266_c5_g1	TRINITY_DN19722_c3_g2	TRINITY_DN23837_c0_g1	TRINITY_DN19854_c1_g3	TRINITY_DN12102_c1_g2	TRINITY_DN18308_c6_g2
OG0002193	NA	NA	NA	NA	UP	NA	NA	NA	NA	8	0	1	1	1	OG0002193	TRINITY_DN22491_c0_g1	TRINITY_DN13235_c0_g1	TRINITY_DN38481_c0_g1	TRINITY_DN20992_c0_g1	TRINITY_DN20223_c4_g1	TRINITY_DN14048_c3_g1	TRINITY_DN13184_c0_g1	TRINITY_DN4321_c0_g2
OG0002198	NA	NA	NA	NA	NA	NA	NA	DW	NA	8	1	0	1	1	OG0002198	TRINITY_DN2285_c3_g2	TRINITY_DN18082_c7_g1	TRINITY_DN45293_c3_g2	TRINITY_DN24803_c8_g1	TRINITY_DN24935_c3_g3	TRINITY_DN18500_c5_g1	TRINITY_DN18289_c7_g1		TRINITY_DN19866_c11_g1
OG0002202	NA	NA	NA	NA	NA	NA	NA	NA	DW	8	1	0	1	1	OG0002202	TRINITY_DN229_c4_g2	TRINITY_DN17723_c2_g3	TRINITY_DN47914_c3_g1	TRINITY_DN23361_c6_g1	TRINITY_DN23448_c1_g2	TRINITY_DN13915_c3_g1	TRINITY_DN19064_c9_g1	TRINITY_DN5514_c0_g3	TRINITY_DN23281_c2_g1
OG0002206	NA	NA	NA	NA	NA	NA	NA	UP	NA	8	0	1	1	1	OG0002206	TRINITY_DN2310_c1_g1	TRINITY_DN17549_c3_g3	TRINITY_DN30370_c0_g1	TRINITY_DN24581_c4_g2	TRINITY_DN22058_c5_g1		TRINITY_DN18786_c2_g1	TRINITY_DN1932_c0_g2	TRINITY_DN20019_c5_g1
OG0002208	NA	NA	DW	NA	NA	NA	NA	NA	NA	8	1	0	1	1	OG0002208	TRINITY_DN23270_c0_g2	TRINITY_DN15650_c0_g1	TRINITY_DN36684_c1_g1	TRINITY_DN20254_c0_g1	TRINITY_DN17313_c0_g1	TRINITY_DN18418_c2_g1	TRINITY_DN20137_c7_g1	TRINITY_DN6637_c0_g1	TRINITY_DN22308_c4_g1
OG0002209	NA	NA	DW	NA	NA	NA	NA	NA	NA	8	1	0	1	1	OG0002209	TRINITY_DN2338_c1_g1	TRINITY_DN18828_c5_g1	TRINITY_DN41964_c6_g4	TRINITY_DN21576_c6_g1	TRINITY_DN21296_c8_g1	TRINITY_DN16917_c3_g1	TRINITY_DN19785_c2_g7	TRINITY_DN2436_c2_g2	TRINITY_DN18767_c6_g1
OG0002212	NA	NA	NA	NA	NA	NA	NA	DW	NA	8	1	0	1	1	OG0002212	TRINITY_DN2352_c0_g4	TRINITY_DN18092_c4_g1	TRINITY_DN45605_c4_g3	TRINITY_DN22399_c4_g1	TRINITY_DN24725_c3_g1	TRINITY_DN15545_c4_g2	TRINITY_DN15682_c0_g1	TRINITY_DN433_c9_g1	TRINITY_DN20055_c4_g3
OG0002215	NA	NA	NA	NA	NA	NA	NA	NA	DW	8	1	0	1	1	OG0002215	TRINITY_DN2379_c0_g2		TRINITY_DN44777_c0_g1	TRINITY_DN22288_c6_g3	TRINITY_DN18515_c5_g1	TRINITY_DN19482_c4_g1	TRINITY_DN17075_c0_g2	TRINITY_DN5208_c1_g2	TRINITY_DN20731_c5_g1
OG0002217	NA	NA	DW	NA	NA	NA	NA	NA	NA	8	1	0	1	1	OG0002217	TRINITY_DN24280_c0_g1	TRINITY_DN16565_c1_g6	TRINITY_DN45100_c0_g1	TRINITY_DN22874_c7_g2	TRINITY_DN18191_c0_g1	TRINITY_DN16542_c9_g1	TRINITY_DN18930_c4_g1	TRINITY_DN68154_c0_g1	TRINITY_DN20435_c3_g1
OG0002218	NA	NA	UP	NA	NA	NA	NA	NA	NA	8	0	1	1	1	OG0002218	TRINITY_DN2434_c0_g1	TRINITY_DN15213_c0_g1	TRINITY_DN41358_c0_g1	TRINITY_DN19319_c0_g1	TRINITY_DN24125_c9_g2		TRINITY_DN11299_c0_g1	TRINITY_DN13658_c0_g1	TRINITY_DN43824_c0_g1
OG0002220	NA	NA	NA	NA	NA	NA	NA	UP	NA	8	0	1	1	1	OG0002220	TRINITY_DN24697_c0_g1	TRINITY_DN17695_c8_g2	TRINITY_DN95015_c0_g1	TRINITY_DN24552_c2_g1	TRINITY_DN19307_c2_g1	TRINITY_DN17595_c2_g1	TRINITY_DN19039_c4_g2	TRINITY_DN20372_c0_g1	TRINITY_DN21503_c0_g3
OG0002223	NA	NA	UP	NA	NA	NA	NA	NA	NA	8	0	1	1	1	OG0002223	TRINITY_DN2477_c0_g2	TRINITY_DN16946_c6_g1	TRINITY_DN42262_c0_g1	TRINITY_DN23247_c10_g3	TRINITY_DN17874_c0_g1	TRINITY_DN16269_c5_g1	TRINITY_DN20758_c6_g1	TRINITY_DN108_c2_g2	TRINITY_DN23796_c7_g3
OG0002224	NA	NA	UP	NA	NA	NA	NA	NA	NA	8	0	1	1	1	OG0002224	TRINITY_DN2482_c1_g1	TRINITY_DN17582_c4_g2	TRINITY_DN40863_c0_g1	TRINITY_DN22003_c0_g1	TRINITY_DN19637_c9_g2	TRINITY_DN17948_c6_g1	TRINITY_DN18171_c5_g2	TRINITY_DN4080_c1_g2	TRINITY_DN20245_c4_g1
OG0002225	NA	NA	DW	NA	NA	NA	NA	NA	NA	8	1	0	1	1	OG0002225	TRINITY_DN25045_c0_g1	TRINITY_DN14450_c0_g2	TRINITY_DN91244_c0_g1	TRINITY_DN21746_c3_g4	TRINITY_DN17500_c0_g1	TRINITY_DN16726_c5_g1	TRINITY_DN14464_c0_g1	TRINITY_DN3699_c0_g1	TRINITY_DN22308_c4_g2
OG0002230	NA	NA	DW	NA	NA	NA	NA	NA	NA	8	1	0	1	1	OG0002230	TRINITY_DN2534_c2_g3	TRINITY_DN18433_c2_g1	TRINITY_DN46295_c2_g1	TRINITY_DN22102_c0_g3	TRINITY_DN18544_c1_g3	TRINITY_DN19531_c2_g1	TRINITY_DN21353_c6_g3	TRINITY_DN321_c2_g1	TRINITY_DN23272_c6_g1
OG0002232	NA	NA	UP	NA	NA	NA	NA	NA	NA	8	0	1	1	1	OG0002232	TRINITY_DN2556_c4_g3	TRINITY_DN19177_c5_g1	TRINITY_DN46244_c2_g1	TRINITY_DN23121_c0_g1	TRINITY_DN24131_c6_g1	TRINITY_DN20597_c4_g1	TRINITY_DN21281_c4_g3	TRINITY_DN1559_c1_g1	TRINITY_DN20579_c4_g1
OG0002233	NA	NA	UP	NA	NA	NA	NA	NA	NA	8	0	1	1	1	OG0002233	TRINITY_DN2561_c0_g1	TRINITY_DN17965_c1_g5	TRINITY_DN42607_c0_g1	TRINITY_DN23513_c8_g1	TRINITY_DN19872_c8_g2	TRINITY_DN20011_c4_g2	TRINITY_DN16976_c0_g1	TRINITY_DN826_c2_g2	TRINITY_DN18281_c1_g2
OG0002235	NA	NA	NA	NA	UP	NA	NA	NA	NA	8	0	1	1	1	OG0002235	TRINITY_DN2569_c3_g1	TRINITY_DN18295_c6_g1	TRINITY_DN47409_c12_g1		TRINITY_DN25014_c6_g2	TRINITY_DN19169_c9_g1	TRINITY_DN17671_c5_g1	TRINITY_DN3429_c0_g1	TRINITY_DN21548_c3_g2
OG0002237	NA	NA	DW	NA	NA	NA	NA	NA	NA	8	1	0	1	1	OG0002237	TRINITY_DN25755_c1_g1	TRINITY_DN13193_c0_g1	TRINITY_DN13199_c0_g2	TRINITY_DN51619_c0_g1	TRINITY_DN15829_c0_g1	TRINITY_DN11509_c0_g1	TRINITY_DN16188_c0_g1	TRINITY_DN3068_c1_g1	TRINITY_DN22633_c6_g1
OG0002242	NA	NA	DW	NA	NA	NA	NA	NA	NA	8	1	0	1	1	OG0002242	TRINITY_DN26172_c2_g1	TRINITY_DN22277_c0_g1	TRINITY_DN38951_c1_g1	TRINITY_DN59030_c0_g1	TRINITY_DN24285_c3_g2	TRINITY_DN19109_c3_g5	TRINITY_DN20645_c1_g3	TRINITY_DN11565_c0_g1	TRINITY_DN23489_c9_g8
OG0002244	NA	NA	DW	NA	NA	NA	NA	NA	NA	8	1	0	1	1	OG0002244	TRINITY_DN2629_c5_g1	TRINITY_DN18590_c1_g3	TRINITY_DN47788_c5_g1	TRINITY_DN22830_c5_g4	TRINITY_DN24325_c6_g4	TRINITY_DN14554_c8_g1	TRINITY_DN19418_c9_g1	TRINITY_DN723_c4_g1	TRINITY_DN22485_c7_g2
OG0002245	NA	NA	DW	NA	NA	NA	NA	NA	NA	8	1	0	1	1	OG0002245	TRINITY_DN50028_c2_g1		TRINITY_DN81467_c0_g1	TRINITY_DN2610_c0_g2	TRINITY_DN44150_c0_g1	TRINITY_DN16169_c5_g4		TRINITY_DN1623_c2_g1	TRINITY_DN18847_c3_g2
OG0002259	NA	NA	DW	NA	NA	NA	NA	NA	NA	8	1	0	1	1	OG0002259	TRINITY_DN2719_c0_g1	TRINITY_DN16599_c7_g1	TRINITY_DN33485_c0_g2	TRINITY_DN24616_c1_g10	TRINITY_DN19883_c4_g6	TRINITY_DN13861_c3_g1	TRINITY_DN3446_c0_g1	TRINITY_DN8451_c0_g1	TRINITY_DN20404_c4_g2
OG0002263	NA	NA	DW	NA	NA	NA	NA	NA	NA	8	1	0	1	1	OG0002263	TRINITY_DN272_c2_g1	TRINITY_DN16855_c7_g1	TRINITY_DN48038_c1_g1	TRINITY_DN22476_c2_g2	TRINITY_DN22875_c2_g1	TRINITY_DN21103_c14_g2	TRINITY_DN19512_c4_g2	TRINITY_DN132_c2_g2	TRINITY_DN21430_c0_g1
OG0002264	NA	NA	UP	NA	NA	NA	NA	NA	NA	8	0	1	1	1	OG0002264	TRINITY_DN27352_c0_g1	TRINITY_DN19448_c2_g2	TRINITY_DN41161_c0_g1	TRINITY_DN22136_c5_g1	TRINITY_DN16633_c0_g1	TRINITY_DN14221_c0_g1	TRINITY_DN20953_c2_g1	TRINITY_DN375_c0_g1	TRINITY_DN21399_c0_g2
OG0002265	NA	NA	UP	NA	NA	NA	NA	NA	NA	8	0	1	1	1	OG0002265	TRINITY_DN27492_c1_g1	TRINITY_DN19382_c5_g2	TRINITY_DN43188_c0_g1	TRINITY_DN22724_c2_g1	TRINITY_DN23550_c4_g1	TRINITY_DN12955_c3_g1	TRINITY_DN17657_c5_g1	TRINITY_DN13258_c0_g1	TRINITY_DN19886_c5_g1
OG0002270	NA	NA	DW	NA	NA	NA	NA	NA	NA	8	1	0	1	1	OG0002270	TRINITY_DN2785_c0_g2	TRINITY_DN19662_c4_g3	TRINITY_DN46113_c3_g2	TRINITY_DN22189_c8_g4	TRINITY_DN17793_c0_g1	TRINITY_DN20319_c8_g1	TRINITY_DN18731_c9_g1	TRINITY_DN6039_c0_g1	TRINITY_DN22597_c6_g2
OG0002271	NA	NA	DW	NA	NA	NA	NA	NA	NA	8	1	0	1	1	OG0002271	TRINITY_DN27873_c0_g2	TRINITY_DN17559_c6_g1	TRINITY_DN47730_c5_g1	TRINITY_DN21647_c5_g1	TRINITY_DN18559_c10_g1	TRINITY_DN18795_c1_g11	TRINITY_DN20680_c5_g2	TRINITY_DN2602_c1_g1	TRINITY_DN19801_c3_g3
OG0002283	NA	NA	DW	NA	NA	NA	NA	NA	NA	8	1	0	1	1	OG0002283	TRINITY_DN2866_c8_g2		TRINITY_DN39790_c1_g2	TRINITY_DN24256_c9_g1	TRINITY_DN24242_c2_g1	TRINITY_DN16629_c7_g1		TRINITY_DN1894_c0_g2	TRINITY_DN23169_c10_g1
OG0002284	NA	NA	DW	NA	NA	NA	NA	NA	NA	8	1	0	1	1	OG0002284	TRINITY_DN286_c1_g4	TRINITY_DN17756_c8_g1	TRINITY_DN45636_c8_g5	TRINITY_DN22100_c2_g1	TRINITY_DN20452_c9_g1	TRINITY_DN15213_c11_g1	TRINITY_DN20656_c2_g1	TRINITY_DN1782_c1_g2	TRINITY_DN19551_c5_g5
OG0002285	NA	NA	NA	NA	NA	NA	NA	DW	NA	8	1	0	1	1	OG0002285	TRINITY_DN286_c23_g2	TRINITY_DN18215_c6_g6	TRINITY_DN40777_c1_g1	TRINITY_DN24662_c1_g2	TRINITY_DN24547_c3_g2	TRINITY_DN8142_c0_g2	TRINITY_DN18639_c5_g1		TRINITY_DN25368_c0_g1
OG0002293	NA	NA	NA	NA	NA	NA	NA	DW	NA	8	1	0	1	1	OG0002293	TRINITY_DN2947_c0_g1	TRINITY_DN18340_c8_g2	TRINITY_DN47215_c0_g1	TRINITY_DN24319_c6_g2	TRINITY_DN21516_c5_g1	TRINITY_DN15632_c8_g5	TRINITY_DN18684_c6_g3		TRINITY_DN21150_c5_g2
OG0002294	NA	NA	UP	NA	NA	NA	NA	NA	NA	8	0	1	1	1	OG0002294	TRINITY_DN2953_c4_g2	TRINITY_DN19183_c3_g1	TRINITY_DN41940_c0_g1	TRINITY_DN23994_c5_g1	TRINITY_DN22469_c5_g1	TRINITY_DN12809_c4_g2	TRINITY_DN17552_c5_g1	TRINITY_DN346_c0_g1	TRINITY_DN23261_c2_g4
OG0002295	NA	NA	UP	NA	NA	NA	NA	NA	NA	8	0	1	1	1	OG0002295	TRINITY_DN295_c25_g1	TRINITY_DN2637_c0_g1	TRINITY_DN39739_c0_g2	TRINITY_DN49733_c0_g1	TRINITY_DN16203_c0_g2	TRINITY_DN15398_c8_g1	TRINITY_DN15472_c0_g1	TRINITY_DN35974_c0_g1	TRINITY_DN21912_c7_g4
OG0002297	NA	NA	NA	NA	NA	NA	NA	DW	NA	8	1	0	1	1	OG0002297	TRINITY_DN29636_c2_g1	TRINITY_DN16551_c5_g1	TRINITY_DN3211_c0_g1	TRINITY_DN1071_c0_g1	TRINITY_DN25080_c4_g2	TRINITY_DN12555_c0_g1	TRINITY_DN21108_c3_g1	TRINITY_DN5153_c0_g2	TRINITY_DN18432_c1_g1
OG0002298	NA	NA	NA	NA	NA	NA	NA	UP	NA	8	0	1	1	1	OG0002298	TRINITY_DN296_c8_g1	TRINITY_DN15782_c0_g1	TRINITY_DN43801_c0_g1	TRINITY_DN22537_c5_g1	TRINITY_DN19301_c3_g1	TRINITY_DN16620_c10_g1	TRINITY_DN19952_c3_g1	TRINITY_DN262_c2_g2	TRINITY_DN23844_c10_g1
OG0002302	NA	NA	NA	NA	NA	NA	NA	DW	NA	8	1	0	1	1	OG0002302	TRINITY_DN29_c12_g2	TRINITY_DN18495_c0_g10	TRINITY_DN44677_c0_g1	TRINITY_DN22563_c0_g2	TRINITY_DN21021_c5_g1	TRINITY_DN14172_c3_g2	TRINITY_DN18982_c5_g3		TRINITY_DN55119_c0_g1
OG0002304	NA	NA	NA	NA	NA	NA	UP	NA	NA	8	0	1	1	1	OG0002304	TRINITY_DN3010_c0_g1	TRINITY_DN16335_c3_g6	TRINITY_DN47733_c1_g1	TRINITY_DN22378_c3_g1	TRINITY_DN21963_c6_g1	TRINITY_DN16471_c4_g1	TRINITY_DN18452_c4_g1	TRINITY_DN4315_c0_g1	TRINITY_DN23939_c8_g1
OG0002311	NA	NA	UP	NA	NA	NA	NA	NA	NA	8	0	1	1	1	OG0002311	TRINITY_DN3092_c0_g2		TRINITY_DN40955_c0_g1	TRINITY_DN21461_c0_g1	TRINITY_DN21313_c3_g3	TRINITY_DN15616_c10_g2	TRINITY_DN17499_c4_g1	TRINITY_DN30807_c0_g1	TRINITY_DN21726_c5_g1
OG0002312	NA	NA	NA	NA	UP	NA	NA	NA	NA	8	0	1	1	1	OG0002312	TRINITY_DN309_c2_g2	TRINITY_DN16666_c5_g2	TRINITY_DN45961_c12_g1	TRINITY_DN23042_c3_g3	TRINITY_DN24435_c7_g1	TRINITY_DN19366_c4_g3	TRINITY_DN21012_c11_g2	TRINITY_DN2907_c0_g3	TRINITY_DN22524_c6_g2
OG0002313	NA	NA	DW	NA	NA	NA	NA	NA	NA	8	1	0	1	1	OG0002313	TRINITY_DN309_c4_g1	TRINITY_DN19790_c2_g4	TRINITY_DN44661_c3_g2	TRINITY_DN24470_c10_g1	TRINITY_DN23066_c5_g3	TRINITY_DN17747_c4_g2	TRINITY_DN19023_c3_g2	TRINITY_DN1088_c0_g6	TRINITY_DN21431_c5_g1
OG0002314	NA	NA	NA	NA	NA	NA	NA	UP	NA	8	0	1	1	1	OG0002314	TRINITY_DN3104_c4_g1	TRINITY_DN19435_c2_g3	TRINITY_DN44737_c0_g3	TRINITY_DN22113_c10_g1	TRINITY_DN24957_c6_g1	TRINITY_DN18851_c3_g2	TRINITY_DN18326_c5_g2	TRINITY_DN2147_c0_g2	TRINITY_DN20878_c12_g1
OG0002317	NA	NA	DW	NA	NA	NA	NA	NA	NA	8	1	0	1	1	OG0002317	TRINITY_DN314_c2_g1	TRINITY_DN18884_c6_g1	TRINITY_DN38519_c0_g1	TRINITY_DN23320_c10_g1	TRINITY_DN25105_c7_g1	TRINITY_DN21336_c2_g1	TRINITY_DN19418_c10_g1	TRINITY_DN500_c0_g2	TRINITY_DN19251_c6_g2
OG0002325	NA	NA	DW	NA	NA	NA	NA	NA	NA	8	1	0	1	1	OG0002325	TRINITY_DN3218_c0_g3	TRINITY_DN19501_c0_g1	TRINITY_DN38499_c0_g1	TRINITY_DN24130_c0_g2	TRINITY_DN25251_c0_g1	TRINITY_DN20905_c2_g1	TRINITY_DN20313_c6_g1	TRINITY_DN2006_c0_g2	TRINITY_DN23931_c1_g1
OG0002327	UP	NA	NA	NA	NA	NA	NA	NA	NA	8	0	1	1	1	OG0002327	TRINITY_DN3264_c1_g1	TRINITY_DN19013_c9_g1	TRINITY_DN43832_c0_g1	TRINITY_DN20189_c0_g1	TRINITY_DN15664_c0_g1		TRINITY_DN21285_c5_g1	TRINITY_DN504_c0_g2	TRINITY_DN11720_c0_g1
OG0002328	NA	NA	NA	NA	NA	NA	NA	DW	NA	8	1	0	1	1	OG0002328	TRINITY_DN32811_c5_g1	TRINITY_DN16369_c0_g1	TRINITY_DN1865_c0_g1	TRINITY_DN3948_c0_g1	TRINITY_DN24360_c15_g1	TRINITY_DN15085_c4_g1	TRINITY_DN19908_c7_g11		TRINITY_DN18640_c1_g4
OG0002332	NA	NA	UP	NA	NA	NA	NA	NA	NA	8	0	1	1	1	OG0002332	TRINITY_DN3324_c0_g2	TRINITY_DN17402_c5_g1	TRINITY_DN46171_c4_g2	TRINITY_DN24311_c10_g1	TRINITY_DN24160_c1_g1	TRINITY_DN15762_c5_g1	TRINITY_DN1677_c0_g2	TRINITY_DN15102_c0_g2	TRINITY_DN21333_c2_g1
OG0002333	NA	NA	UP	NA	NA	NA	NA	NA	NA	8	0	1	1	1	OG0002333	TRINITY_DN33312_c3_g1	TRINITY_DN17786_c0_g1	TRINITY_DN60658_c0_g1	TRINITY_DN35376_c0_g1	TRINITY_DN17756_c0_g2	TRINITY_DN5150_c0_g2	TRINITY_DN5119_c0_g1	TRINITY_DN4149_c4_g1	TRINITY_DN19284_c2_g2
OG0002334	NA	NA	DW	NA	NA	NA	NA	NA	NA	8	1	0	1	1	OG0002334	TRINITY_DN33428_c3_g1	TRINITY_DN17628_c8_g11	TRINITY_DN42160_c3_g1	TRINITY_DN22844_c5_g4	TRINITY_DN17770_c0_g1	TRINITY_DN19503_c3_g6	TRINITY_DN18319_c1_g1	TRINITY_DN3324_c1_g1	TRINITY_DN19317_c6_g3
OG0002338	NA	NA	NA	NA	NA	NA	NA	UP	NA	8	0	1	1	1	OG0002338	TRINITY_DN3376_c0_g2	TRINITY_DN18900_c0_g1	TRINITY_DN40586_c1_g1	TRINITY_DN20384_c0_g1	TRINITY_DN22266_c10_g1	TRINITY_DN13402_c4_g1	TRINITY_DN7602_c0_g1	TRINITY_DN1005_c0_g3	TRINITY_DN19973_c1_g1
OG0002340	NA	NA	NA	NA	NA	NA	NA	NA	DW	8	1	0	1	1	OG0002340	TRINITY_DN33887_c1_g1	TRINITY_DN17662_c5_g1	TRINITY_DN40409_c0_g1	TRINITY_DN22161_c5_g1	TRINITY_DN24116_c1_g1	TRINITY_DN20725_c7_g1	TRINITY_DN4326_c0_g1	TRINITY_DN17987_c0_g3	TRINITY_DN22585_c2_g2
OG0002347	NA	NA	NA	NA	NA	NA	NA	DW	NA	8	1	0	1	1	OG0002347	TRINITY_DN344_c3_g2	TRINITY_DN17081_c6_g1	TRINITY_DN48780_c1_g2	TRINITY_DN24422_c4_g2	TRINITY_DN22489_c5_g1	TRINITY_DN13712_c5_g10	TRINITY_DN18880_c1_g1		TRINITY_DN23199_c2_g1
OG0002360	NA	NA	NA	NA	NA	NA	NA	DW	NA	8	1	0	1	1	OG0002360	TRINITY_DN35813_c1_g1	TRINITY_DN18320_c9_g1	TRINITY_DN50990_c0_g1	TRINITY_DN52816_c0_g1	TRINITY_DN50335_c0_g1	TRINITY_DN3194_c0_g1	TRINITY_DN9333_c0_g2		TRINITY_DN51016_c0_g1
OG0002362	NA	NA	NA	NA	NA	NA	NA	DW	NA	8	1	0	1	1	OG0002362	TRINITY_DN3602_c0_g2	TRINITY_DN16131_c0_g1	TRINITY_DN42726_c8_g1	TRINITY_DN22780_c10_g2	TRINITY_DN20623_c0_g1	TRINITY_DN19865_c4_g1	TRINITY_DN17825_c4_g1		TRINITY_DN23348_c4_g2
OG0002374	NA	NA	NA	NA	NA	NA	NA	DW	NA	8	1	0	1	1	OG0002374	TRINITY_DN37105_c1_g2	TRINITY_DN16592_c7_g1	TRINITY_DN42565_c1_g1	TRINITY_DN23629_c9_g1	TRINITY_DN25187_c0_g2	TRINITY_DN21336_c3_g1	TRINITY_DN19126_c7_g2		TRINITY_DN22841_c1_g1
OG0002379	UP	NA	NA	NA	NA	NA	NA	NA	NA	8	0	1	1	1	OG0002379	TRINITY_DN38045_c0_g1	TRINITY_DN18815_c13_g7	TRINITY_DN43548_c5_g1	TRINITY_DN23516_c4_g1	TRINITY_DN24465_c6_g2	TRINITY_DN16932_c7_g1	TRINITY_DN18782_c3_g2	TRINITY_DN806_c1_g6	TRINITY_DN19765_c6_g3
OG0002382	NA	NA	DW	NA	NA	NA	NA	NA	NA	8	1	0	1	1	OG0002382	TRINITY_DN381_c1_g2	TRINITY_DN16701_c0_g1	TRINITY_DN37089_c0_g1	TRINITY_DN24019_c0_g1	TRINITY_DN23815_c0_g1	TRINITY_DN18459_c0_g1	TRINITY_DN20269_c1_g1	TRINITY_DN1317_c4_g1	TRINITY_DN22372_c2_g1
OG0002387	NA	DW	NA	NA	NA	NA	NA	NA	NA	8	1	0	1	1	OG0002387	TRINITY_DN38484_c1_g1	TRINITY_DN17610_c2_g1	TRINITY_DN40133_c0_g1	TRINITY_DN20025_c0_g1	TRINITY_DN41469_c0_g1	TRINITY_DN11874_c0_g1	TRINITY_DN13947_c0_g1	TRINITY_DN3153_c1_g2	TRINITY_DN20740_c5_g2
OG0002388	NA	NA	NA	NA	NA	NA	NA	DW	NA	8	1	0	1	1	OG0002388	TRINITY_DN3862_c0_g1	TRINITY_DN15183_c0_g1	TRINITY_DN30816_c0_g2	TRINITY_DN20169_c0_g1	TRINITY_DN17278_c0_g1	TRINITY_DN12588_c0_g1	TRINITY_DN43323_c0_g1		TRINITY_DN18516_c5_g1
OG0002392	NA	NA	UP	NA	NA	NA	NA	NA	NA	8	0	1	1	1	OG0002392	TRINITY_DN3902_c0_g1	TRINITY_DN17439_c4_g1	TRINITY_DN45388_c7_g1	TRINITY_DN20771_c0_g1	TRINITY_DN19067_c2_g2	TRINITY_DN14184_c9_g1	TRINITY_DN21019_c8_g1	TRINITY_DN1160_c1_g2	TRINITY_DN19399_c2_g1
OG0002395	NA	NA	NA	NA	NA	NA	NA	UP	NA	8	0	1	1	1	OG0002395	TRINITY_DN3933_c1_g2	TRINITY_DN26401_c0_g1	TRINITY_DN73682_c0_g1	TRINITY_DN25877_c0_g1	TRINITY_DN19162_c4_g1	TRINITY_DN20508_c3_g2	TRINITY_DN26719_c0_g1	TRINITY_DN5441_c0_g2	TRINITY_DN20210_c4_g1
OG0002397	NA	NA	DW	NA	NA	NA	NA	NA	NA	8	1	0	1	1	OG0002397	TRINITY_DN3944_c2_g1	TRINITY_DN16147_c5_g2	TRINITY_DN44680_c9_g1	TRINITY_DN24565_c1_g1	TRINITY_DN19252_c4_g2	TRINITY_DN17399_c9_g3	TRINITY_DN20771_c3_g6	TRINITY_DN4787_c0_g2	TRINITY_DN21990_c4_g2
OG0002399	NA	NA	NA	NA	UP	NA	NA	NA	NA	8	0	1	1	1	OG0002399	TRINITY_DN3998_c0_g2	TRINITY_DN19236_c1_g5	TRINITY_DN48840_c0_g1	TRINITY_DN24067_c8_g1	TRINITY_DN24034_c1_g1	TRINITY_DN18249_c5_g3	TRINITY_DN18783_c5_g1	TRINITY_DN3118_c0_g2	TRINITY_DN20806_c1_g4
OG0002404	NA	NA	NA	NA	DW	NA	NA	NA	NA	8	1	0	1	1	OG0002404	TRINITY_DN402_c0_g1	TRINITY_DN16520_c3_g1	TRINITY_DN43102_c6_g1	TRINITY_DN22512_c5_g1	TRINITY_DN19332_c0_g1	TRINITY_DN12339_c7_g1	TRINITY_DN17576_c5_g2	TRINITY_DN764_c1_g1	TRINITY_DN23665_c24_g2
OG0002407	NA	NA	NA	NA	NA	NA	NA	DW	NA	8	1	0	1	1	OG0002407	TRINITY_DN40778_c0_g1	TRINITY_DN17461_c8_g1	TRINITY_DN44856_c0_g1	TRINITY_DN17323_c0_g1	TRINITY_DN23448_c0_g1	TRINITY_DN18839_c4_g1	TRINITY_DN19617_c0_g1		TRINITY_DN20942_c6_g1
OG0002410	NA	NA	UP	NA	NA	NA	NA	NA	NA	8	0	1	1	1	OG0002410	TRINITY_DN4157_c2_g1	TRINITY_DN16663_c10_g2	TRINITY_DN40320_c0_g1	TRINITY_DN19787_c0_g1	TRINITY_DN17065_c0_g1	TRINITY_DN14149_c1_g2	TRINITY_DN17377_c0_g1	TRINITY_DN1753_c0_g1	TRINITY_DN20061_c3_g2
OG0002414	UP	NA	NA	NA	NA	NA	NA	NA	NA	8	0	1	1	1	OG0002414	TRINITY_DN4255_c0_g2	TRINITY_DN19511_c3_g1	TRINITY_DN48285_c2_g3	TRINITY_DN20345_c0_g1	TRINITY_DN17422_c0_g1	TRINITY_DN19447_c5_g1	TRINITY_DN19674_c0_g1	TRINITY_DN10086_c0_g1	TRINITY_DN23002_c8_g4
OG0002424	NA	NA	NA	NA	NA	NA	NA	NA	UP	8	0	1	1	1	OG0002424	TRINITY_DN4400_c1_g2	TRINITY_DN19135_c3_g1	TRINITY_DN45571_c7_g1	TRINITY_DN20736_c0_g1	TRINITY_DN22254_c4_g1	TRINITY_DN21316_c6_g1	TRINITY_DN19461_c0_g2	TRINITY_DN986_c1_g2	TRINITY_DN23851_c0_g3
OG0002425	NA	NA	NA	NA	NA	NA	NA	DW	NA	8	1	0	1	1	OG0002425	TRINITY_DN441_c2_g1	TRINITY_DN17456_c0_g1	TRINITY_DN48755_c4_g1	TRINITY_DN24731_c4_g1	TRINITY_DN23516_c4_g1	TRINITY_DN18913_c5_g1	TRINITY_DN19659_c1_g2		TRINITY_DN18185_c6_g1
OG0002433	NA	NA	NA	NA	NA	NA	NA	DW	NA	8	1	0	1	1	OG0002433	TRINITY_DN4504_c1_g1	TRINITY_DN18462_c7_g11	TRINITY_DN28755_c0_g1	TRINITY_DN20379_c0_g1	TRINITY_DN24826_c5_g5		TRINITY_DN18184_c2_g6		TRINITY_DN19245_c7_g3
OG0002437	NA	NA	NA	NA	NA	NA	NA	DW	NA	8	1	0	1	1	OG0002437	TRINITY_DN462_c7_g1	TRINITY_DN17414_c5_g5	TRINITY_DN45605_c3_g2	TRINITY_DN22192_c7_g1	TRINITY_DN25090_c3_g2	TRINITY_DN16610_c6_g2	TRINITY_DN19053_c5_g1		TRINITY_DN23554_c2_g1
OG0002441	NA	NA	DW	NA	NA	NA	NA	NA	NA	8	1	0	1	1	OG0002441	TRINITY_DN468_c0_g2	TRINITY_DN16423_c6_g4	TRINITY_DN70419_c0_g1	TRINITY_DN23273_c1_g3	TRINITY_DN24751_c5_g2	TRINITY_DN20537_c0_g1	TRINITY_DN19466_c3_g1	TRINITY_DN1879_c0_g1	TRINITY_DN19440_c8_g1
OG0002442	NA	NA	DW	NA	NA	NA	NA	NA	NA	8	1	0	1	1	OG0002442	TRINITY_DN46904_c1_g1	TRINITY_DN12448_c0_g2	TRINITY_DN14110_c0_g1	TRINITY_DN55237_c0_g1	TRINITY_DN21300_c4_g1	TRINITY_DN13452_c3_g1	TRINITY_DN11363_c0_g1	TRINITY_DN10791_c0_g1	TRINITY_DN18987_c7_g1
OG0002446	NA	NA	UP	NA	NA	NA	NA	NA	NA	8	0	1	1	1	OG0002446	TRINITY_DN471_c0_g1	TRINITY_DN16963_c5_g9	TRINITY_DN46215_c4_g1		TRINITY_DN15742_c0_g2		TRINITY_DN20708_c0_g4	TRINITY_DN7911_c0_g2	TRINITY_DN18838_c6_g2
OG0002452	DW	NA	NA	NA	NA	NA	NA	NA	NA	8	1	0	1	1	OG0002452	TRINITY_DN485_c0_g2	TRINITY_DN19383_c5_g2	TRINITY_DN48344_c5_g1	TRINITY_DN24479_c8_g1	TRINITY_DN23084_c2_g1	TRINITY_DN20650_c5_g1	TRINITY_DN19857_c4_g1	TRINITY_DN684_c0_g1	TRINITY_DN20594_c5_g1
OG0002453	NA	NA	UP	NA	NA	NA	NA	NA	NA	8	0	1	1	1	OG0002453	TRINITY_DN48820_c0_g1	TRINITY_DN22374_c0_g1	TRINITY_DN83625_c0_g1	TRINITY_DN24267_c6_g1	TRINITY_DN24077_c0_g2	TRINITY_DN16588_c1_g1	TRINITY_DN14923_c0_g1	TRINITY_DN2171_c0_g1
OG0002459	NA	NA	NA	NA	NA	NA	NA	NA	DW	8	1	0	1	1	OG0002459	TRINITY_DN491_c0_g1	TRINITY_DN19331_c2_g1	TRINITY_DN42438_c1_g2	TRINITY_DN21822_c6_g1	TRINITY_DN19757_c1_g1	TRINITY_DN19565_c8_g1	TRINITY_DN20166_c4_g1	TRINITY_DN3161_c0_g1	TRINITY_DN21633_c1_g1
OG0002465	NA	NA	UP	NA	NA	NA	NA	NA	NA	8	0	1	1	1	OG0002465	TRINITY_DN4953_c0_g5	TRINITY_DN19440_c2_g3	TRINITY_DN44134_c7_g1	TRINITY_DN22189_c9_g1	TRINITY_DN25153_c5_g1	TRINITY_DN16591_c2_g1	TRINITY_DN19995_c3_g1	TRINITY_DN662_c3_g2	TRINITY_DN20375_c4_g2
OG0002468	NA	NA	DW	NA	NA	NA	NA	NA	NA	8	1	0	1	1	OG0002468	TRINITY_DN500_c2_g2	TRINITY_DN16875_c4_g1	TRINITY_DN45894_c3_g1	TRINITY_DN23503_c2_g2	TRINITY_DN20281_c4_g2	TRINITY_DN21428_c5_g2	TRINITY_DN19683_c0_g1	TRINITY_DN4_c0_g3	TRINITY_DN23712_c9_g1
OG0002474	NA	NA	UP	NA	NA	NA	NA	NA	NA	8	0	1	1	1	OG0002474	TRINITY_DN509_c1_g1	TRINITY_DN17873_c6_g1	TRINITY_DN46603_c1_g1	TRINITY_DN22275_c4_g1	TRINITY_DN20599_c5_g1	TRINITY_DN20078_c7_g1	TRINITY_DN21115_c9_g2	TRINITY_DN1009_c1_g3	TRINITY_DN26540_c6_g1
OG0002478	NA	NA	DW	NA	NA	NA	NA	NA	NA	8	1	0	1	1	OG0002478	TRINITY_DN515_c0_g4	TRINITY_DN18264_c3_g8	TRINITY_DN45279_c3_g2	TRINITY_DN24600_c3_g1	TRINITY_DN18802_c1_g1	TRINITY_DN15606_c7_g2	TRINITY_DN18747_c3_g1	TRINITY_DN512_c0_g2	TRINITY_DN22706_c1_g1
OG0002486	NA	NA	UP	NA	NA	NA	NA	NA	NA	8	0	1	1	1	OG0002486	TRINITY_DN52254_c1_g1	TRINITY_DN25357_c0_g1	TRINITY_DN37408_c0_g1	TRINITY_DN14330_c0_g1	TRINITY_DN23577_c6_g2	TRINITY_DN21868_c0_g1		TRINITY_DN20279_c1_g1	TRINITY_DN21752_c0_g1
OG0002493	NA	NA	NA	NA	NA	NA	NA	DW	NA	8	1	0	1	1	OG0002493	TRINITY_DN5323_c0_g2	TRINITY_DN15451_c0_g1	TRINITY_DN41641_c0_g1	TRINITY_DN20627_c0_g1		TRINITY_DN17615_c5_g1	TRINITY_DN16604_c0_g1		TRINITY_DN51452_c0_g1
OG0002504	NA	NA	UP	NA	NA	NA	NA	NA	NA	8	0	1	1	1	OG0002504	TRINITY_DN54888_c1_g1		TRINITY_DN1911_c0_g1	TRINITY_DN24188_c3_g3	TRINITY_DN30836_c0_g1	TRINITY_DN26677_c0_g1	TRINITY_DN25773_c0_g1	TRINITY_DN3315_c0_g1	TRINITY_DN6461_c0_g1
OG0002505	NA	NA	NA	NA	NA	NA	NA	NA	DW	8	1	0	1	1	OG0002505	TRINITY_DN54972_c1_g1	TRINITY_DN17993_c5_g3	TRINITY_DN49270_c0_g1	TRINITY_DN17879_c0_g2		TRINITY_DN20954_c11_g4	TRINITY_DN7291_c0_g1	TRINITY_DN25149_c0_g1	TRINITY_DN22718_c5_g3
OG0002511	NA	NA	DW	NA	NA	NA	NA	NA	NA	8	1	0	1	1	OG0002511	TRINITY_DN5604_c0_g4	TRINITY_DN19364_c10_g4	TRINITY_DN48539_c1_g2	TRINITY_DN23774_c2_g14	TRINITY_DN19382_c2_g3	TRINITY_DN20183_c10_g1		TRINITY_DN747_c0_g3	TRINITY_DN18454_c5_g2
OG0002522	NA	NA	UP	NA	NA	NA	NA	NA	NA	8	0	1	1	1	OG0002522	TRINITY_DN5885_c1_g2	TRINITY_DN19507_c2_g2	TRINITY_DN48483_c0_g2	TRINITY_DN22344_c6_g1	TRINITY_DN21215_c3_g1	TRINITY_DN18286_c2_g2	TRINITY_DN19415_c5_g1	TRINITY_DN241_c6_g2	TRINITY_DN20145_c3_g1
OG0002526	NA	NA	NA	NA	DW	NA	NA	NA	NA	8	1	0	1	1	OG0002526	TRINITY_DN5996_c0_g1	TRINITY_DN19342_c0_g1	TRINITY_DN48536_c0_g1	TRINITY_DN24401_c7_g2	TRINITY_DN23127_c0_g2	TRINITY_DN19830_c3_g1	TRINITY_DN20853_c3_g1	TRINITY_DN2657_c0_g1	TRINITY_DN20732_c3_g1
OG0002535	NA	NA	DW	NA	NA	NA	NA	NA	NA	8	1	0	1	1	OG0002535	TRINITY_DN6361_c8_g1	TRINITY_DN16974_c9_g1	TRINITY_DN25541_c0_g1	TRINITY_DN57397_c0_g1	TRINITY_DN14913_c0_g1	TRINITY_DN19836_c5_g1	TRINITY_DN5960_c0_g1	TRINITY_DN69223_c2_g1	TRINITY_DN19516_c4_g1
OG0002554	NA	NA	DW	NA	NA	NA	NA	NA	NA	8	1	0	1	1	OG0002554	TRINITY_DN6696_c0_g2	TRINITY_DN18940_c14_g2	TRINITY_DN44699_c0_g1	TRINITY_DN24325_c4_g5	TRINITY_DN19849_c6_g1	TRINITY_DN21319_c10_g1	TRINITY_DN20641_c7_g2	TRINITY_DN18_c1_g2	TRINITY_DN18390_c4_g1
OG0002555	NA	NA	NA	NA	NA	NA	NA	NA	DW	8	1	0	1	1	OG0002555	TRINITY_DN6709_c2_g1	TRINITY_DN19265_c9_g3	TRINITY_DN41981_c3_g2	TRINITY_DN21910_c5_g3	TRINITY_DN24467_c2_g1	TRINITY_DN17056_c2_g2	TRINITY_DN19184_c7_g1	TRINITY_DN5619_c1_g1	TRINITY_DN21817_c3_g1
OG0002556	NA	NA	UP	NA	NA	NA	NA	NA	NA	8	0	1	1	1	OG0002556	TRINITY_DN6733_c0_g2		TRINITY_DN84596_c0_g1	TRINITY_DN19121_c0_g1	TRINITY_DN17649_c0_g1	TRINITY_DN12647_c7_g4	TRINITY_DN19615_c0_g1	TRINITY_DN6007_c0_g1	TRINITY_DN21265_c5_g1
OG0002565	NA	DW	NA	NA	NA	NA	NA	NA	NA	8	1	0	1	1	OG0002565	TRINITY_DN691_c0_g2	TRINITY_DN22819_c0_g1	TRINITY_DN42153_c2_g1	TRINITY_DN22231_c5_g1	TRINITY_DN19359_c7_g1	TRINITY_DN14575_c13_g1	TRINITY_DN21174_c3_g1	TRINITY_DN6581_c1_g1	TRINITY_DN19139_c6_g1
OG0002581	NA	NA	DW	NA	NA	NA	NA	NA	NA	8	1	0	1	1	OG0002581	TRINITY_DN7375_c0_g2	TRINITY_DN18449_c6_g3	TRINITY_DN47863_c3_g1	TRINITY_DN24483_c3_g2	TRINITY_DN22912_c4_g3	TRINITY_DN18906_c1_g2	TRINITY_DN19482_c0_g1	TRINITY_DN1231_c1_g3	TRINITY_DN22074_c1_g2
OG0002588	NA	NA	NA	NA	NA	NA	NA	DW	NA	8	1	0	1	1	OG0002588	TRINITY_DN7531_c1_g3	TRINITY_DN17755_c3_g1	TRINITY_DN44582_c1_g1	TRINITY_DN21159_c0_g2	TRINITY_DN23185_c6_g1		TRINITY_DN18666_c6_g2		TRINITY_DN59591_c0_g1
OG0002601	NA	NA	NA	NA	NA	NA	NA	NA	DW	8	1	0	1	1	OG0002601	TRINITY_DN785_c0_g1	TRINITY_DN17003_c5_g1	TRINITY_DN47415_c4_g2	TRINITY_DN23688_c9_g2	TRINITY_DN22306_c8_g2	TRINITY_DN11659_c0_g1	TRINITY_DN18802_c9_g2	TRINITY_DN19882_c0_g1	TRINITY_DN22625_c10_g1
OG0002611	NA	NA	DW	NA	NA	NA	NA	NA	NA	8	1	0	1	1	OG0002611	TRINITY_DN803_c2_g1	TRINITY_DN18500_c1_g1	TRINITY_DN42155_c0_g1	TRINITY_DN21423_c10_g6	TRINITY_DN24899_c1_g1	TRINITY_DN12343_c0_g1	TRINITY_DN18381_c6_g1	TRINITY_DN4021_c1_g2	TRINITY_DN23141_c0_g1
OG0002615	NA	NA	NA	NA	NA	NA	NA	NA	DW	8	1	0	1	1	OG0002615	TRINITY_DN816_c2_g1	TRINITY_DN18765_c1_g1	TRINITY_DN44597_c5_g2	TRINITY_DN23565_c4_g3	TRINITY_DN19150_c2_g1	TRINITY_DN12657_c11_g2	TRINITY_DN18151_c6_g3	TRINITY_DN3574_c0_g1	TRINITY_DN22066_c0_g1
OG0002618	NA	NA	NA	NA	NA	NA	NA	NA	DW	8	1	0	1	1	OG0002618	TRINITY_DN822_c9_g1	TRINITY_DN19538_c3_g4	TRINITY_DN45681_c1_g1	TRINITY_DN24513_c2_g2	TRINITY_DN20802_c11_g1	TRINITY_DN19485_c6_g1	TRINITY_DN17179_c0_g1	TRINITY_DN5212_c0_g1	TRINITY_DN20336_c0_g1
OG0002631	NA	NA	NA	NA	NA	NA	NA	DW	NA	8	1	0	1	1	OG0002631	TRINITY_DN880_c1_g3		TRINITY_DN41735_c8_g2	TRINITY_DN23476_c4_g1	TRINITY_DN19338_c8_g1	TRINITY_DN20161_c2_g2	TRINITY_DN18434_c0_g6		TRINITY_DN21589_c1_g1
OG0002632	NA	NA	NA	NA	NA	NA	NA	DW	NA	8	1	0	1	1	OG0002632	TRINITY_DN882_c4_g1	TRINITY_DN17928_c4_g9	TRINITY_DN41335_c7_g1	TRINITY_DN24389_c13_g3	TRINITY_DN21533_c3_g2	TRINITY_DN13803_c5_g1	TRINITY_DN19610_c3_g4		TRINITY_DN15200_c0_g1
OG0002635	NA	NA	NA	NA	NA	NA	NA	DW	NA	8	1	0	1	1	OG0002635	TRINITY_DN889_c5_g1	TRINITY_DN18421_c6_g1	TRINITY_DN43382_c2_g1	TRINITY_DN22393_c12_g1	TRINITY_DN19772_c7_g1	TRINITY_DN14087_c7_g1	TRINITY_DN18372_c8_g4		TRINITY_DN23546_c6_g1
OG0002641	NA	NA	UP	NA	NA	NA	NA	NA	NA	8	0	1	1	1	OG0002641	TRINITY_DN9009_c1_g1	TRINITY_DN16153_c0_g1	TRINITY_DN39698_c0_g1	TRINITY_DN21179_c0_g1	TRINITY_DN23402_c1_g2	TRINITY_DN19960_c2_g1	TRINITY_DN18538_c6_g1	TRINITY_DN1834_c0_g1	TRINITY_DN40611_c0_g1
OG0002642	NA	NA	NA	NA	NA	NA	NA	UP	NA	8	0	1	1	1	OG0002642	TRINITY_DN905_c4_g3	TRINITY_DN17631_c4_g3	TRINITY_DN48244_c4_g1	TRINITY_DN23449_c7_g1		TRINITY_DN12850_c3_g1	TRINITY_DN20427_c3_g6	TRINITY_DN2514_c0_g1	TRINITY_DN23489_c9_g4
OG0002650	NA	NA	NA	NA	NA	NA	NA	UP	NA	8	0	1	1	1	OG0002650	TRINITY_DN937_c4_g1	TRINITY_DN17746_c3_g2	TRINITY_DN48985_c0_g1	TRINITY_DN22543_c0_g4	TRINITY_DN23723_c6_g3	TRINITY_DN20438_c2_g1	TRINITY_DN19211_c3_g2	TRINITY_DN3279_c0_g5	TRINITY_DN20458_c4_g2
OG0002651	NA	NA	DW	NA	NA	NA	NA	NA	NA	8	1	0	1	1	OG0002651	TRINITY_DN9496_c9_g1	TRINITY_DN17458_c3_g3	TRINITY_DN39997_c0_g1	TRINITY_DN22443_c5_g6	TRINITY_DN20890_c2_g1	TRINITY_DN17849_c5_g1	TRINITY_DN18603_c5_g9	TRINITY_DN13556_c3_g1	TRINITY_DN23134_c7_g2
OG0002655	NA	NA	NA	DW	NA	NA	NA	NA	NA	8	1	0	1	1	OG0002655	TRINITY_DN9568_c0_g1	TRINITY_DN15828_c0_g1	TRINITY_DN42135_c0_g1	TRINITY_DN9211_c0_g2	TRINITY_DN18241_c8_g1	TRINITY_DN13161_c8_g1	TRINITY_DN17102_c0_g1	TRINITY_DN1900_c0_g2	TRINITY_DN20385_c6_g1
OG0002658	NA	NA	UP	NA	NA	NA	NA	NA	NA	8	0	1	1	1	OG0002658	TRINITY_DN966_c0_g2	TRINITY_DN17926_c5_g3	TRINITY_DN45264_c4_g1	TRINITY_DN23966_c6_g2	TRINITY_DN22595_c0_g1	TRINITY_DN16809_c9_g1	TRINITY_DN19169_c2_g1	TRINITY_DN1880_c2_g2	TRINITY_DN18575_c6_g3
OG0002674	NA	NA	DW	NA	NA	NA	NA	NA	NA	8	1	0	1	1	OG0002674		TRINITY_DN12517_c0_g1	TRINITY_DN64486_c0_g1	TRINITY_DN48775_c0_g1		TRINITY_DN9418_c0_g2	TRINITY_DN19654_c4_g6	TRINITY_DN8804_c0_g1	TRINITY_DN19347_c4_g4
OG0002683	NA	NA	DW	NA	NA	NA	NA	NA	NA	8	1	0	1	1	OG0002683		TRINITY_DN16232_c7_g1	TRINITY_DN40429_c0_g2	TRINITY_DN49722_c0_g1	TRINITY_DN19950_c8_g1	TRINITY_DN16540_c7_g6		TRINITY_DN2382_c2_g1	TRINITY_DN21748_c0_g1
OG0002690	NA	NA	UP	NA	NA	NA	NA	NA	NA	8	0	1	1	1	OG0002690		TRINITY_DN16712_c2_g1	TRINITY_DN42605_c2_g1	TRINITY_DN24600_c7_g1	TRINITY_DN20523_c7_g5	TRINITY_DN17107_c2_g1	TRINITY_DN21094_c6_g1	TRINITY_DN49157_c0_g1	TRINITY_DN20666_c6_g1
OG0002698	NA	NA	DW	NA	NA	NA	NA	NA	NA	8	1	0	1	1	OG0002698		TRINITY_DN17438_c7_g2	TRINITY_DN84565_c0_g1	TRINITY_DN23303_c6_g1	TRINITY_DN16396_c0_g1	TRINITY_DN16975_c3_g2	TRINITY_DN16887_c0_g1	TRINITY_DN4935_c2_g1	TRINITY_DN18745_c4_g1
OG0002700	NA	NA	NA	NA	UP	NA	NA	NA	NA	8	0	1	1	1	OG0002700		TRINITY_DN19736_c6_g1	TRINITY_DN46697_c3_g7	TRINITY_DN23138_c6_g1	TRINITY_DN25167_c4_g1	TRINITY_DN16165_c5_g2	TRINITY_DN20921_c3_g3	TRINITY_DN1020_c7_g1
OG0002702	NA	NA	NA	NA	NA	NA	NA	DW	NA	8	1	0	1	1	OG0002702		TRINITY_DN17744_c2_g6	TRINITY_DN45913_c0_g1	TRINITY_DN24554_c8_g4	TRINITY_DN24794_c2_g1	TRINITY_DN19754_c2_g1	TRINITY_DN19265_c1_g2		TRINITY_DN20968_c6_g1
OG0002704	NA	NA	NA	NA	NA	NA	NA	DW	NA	8	1	0	1	1	OG0002704		TRINITY_DN17870_c3_g1	TRINITY_DN48562_c2_g1	TRINITY_DN22214_c8_g2	TRINITY_DN24414_c2_g3	TRINITY_DN19983_c3_g1	TRINITY_DN20568_c1_g1		TRINITY_DN20004_c5_g3
OG0002710	NA	NA	DW	NA	NA	NA	NA	NA	NA	8	1	0	1	1	OG0002710		TRINITY_DN18342_c5_g2	TRINITY_DN47184_c0_g3	TRINITY_DN22645_c4_g3	TRINITY_DN20253_c3_g1	TRINITY_DN19104_c10_g1	TRINITY_DN20983_c4_g1	TRINITY_DN163_c0_g6	TRINITY_DN23274_c5_g2
OG0002712	NA	NA	NA	NA	NA	NA	NA	DW	NA	8	1	0	1	1	OG0002712		TRINITY_DN18580_c1_g1	TRINITY_DN46839_c4_g1	TRINITY_DN23669_c8_g2	TRINITY_DN24009_c5_g1	TRINITY_DN15000_c4_g1	TRINITY_DN18782_c5_g1		TRINITY_DN22991_c5_g1
OG0002729	NA	NA	NA	NA	NA	NA	NA	DW	NA	8	1	0	1	1	OG0002729		TRINITY_DN30456_c0_g1	TRINITY_DN56016_c0_g1	TRINITY_DN60876_c0_g1	TRINITY_DN21726_c4_g1	TRINITY_DN19916_c0_g1	TRINITY_DN17998_c6_g2		TRINITY_DN18454_c1_g1
OG0002734	NA	NA	DW	NA	NA	NA	NA	NA	NA	8	1	0	1	1	OG0002734		TRINITY_DN36432_c0_g1	TRINITY_DN65964_c0_g1	TRINITY_DN35311_c0_g1		TRINITY_DN11800_c0_g2	TRINITY_DN3731_c0_g1	TRINITY_DN16952_c0_g1	TRINITY_DN18705_c7_g1
OG0002739	NA	NA	NA	NA	UP	NA	NA	NA	NA	8	0	1	1	1	OG0002739			TRINITY_DN4918_c0_g1	TRINITY_DN16768_c0_g2	TRINITY_DN14111_c0_g1	TRINITY_DN9105_c0_g1	TRINITY_DN12549_c0_g1	TRINITY_DN1663_c6_g1	TRINITY_DN21085_c7_g1
OG0002741	NA	NA	DW	NA	NA	NA	NA	NA	NA	8	1	0	1	1	OG0002741			TRINITY_DN30909_c0_g1	TRINITY_DN18082_c0_g1	TRINITY_DN13849_c0_g1	TRINITY_DN16289_c2_g2	TRINITY_DN5740_c0_g1	TRINITY_DN2105_c6_g1	TRINITY_DN22499_c8_g1
OG0002757	NA	NA	NA	NA	NA	NA	NA	UP	NA	8	0	1	1	1	OG0002757	TRINITY_DN10013_c0_g2	TRINITY_DN19213_c6_g2	TRINITY_DN45473_c0_g1	TRINITY_DN20861_c0_g1	TRINITY_DN17977_c0_g1	TRINITY_DN12439_c9_g2	TRINITY_DN15572_c0_g1	TRINITY_DN2033_c3_g1	TRINITY_DN21995_c2_g5
OG0002773	NA	NA	NA	NA	NA	NA	NA	DW	NA	8	1	0	1	1	OG0002773	TRINITY_DN1016_c0_g2	TRINITY_DN18032_c8_g1	TRINITY_DN48080_c0_g2	TRINITY_DN23516_c9_g1	TRINITY_DN23708_c2_g1	TRINITY_DN16724_c1_g1	TRINITY_DN19897_c2_g1	TRINITY_DN2753_c1_g1	TRINITY_DN23270_c10_g1
OG0002796	UP	NA	NA	NA	NA	NA	NA	NA	NA	8	0	1	1	1	OG0002796	TRINITY_DN10383_c0_g1	TRINITY_DN16095_c0_g1	TRINITY_DN41761_c0_g1	TRINITY_DN21060_c0_g1	TRINITY_DN19058_c0_g1	TRINITY_DN17365_c2_g1	TRINITY_DN19098_c4_g1	TRINITY_DN2985_c0_g1	TRINITY_DN20192_c5_g1
OG0002812	NA	NA	DW	NA	NA	NA	NA	NA	NA	8	1	0	1	1	OG0002812	TRINITY_DN1047_c0_g1	TRINITY_DN19417_c3_g1	TRINITY_DN46314_c0_g1	TRINITY_DN21833_c0_g1	TRINITY_DN24560_c4_g1	TRINITY_DN20820_c0_g1	TRINITY_DN20701_c0_g1	TRINITY_DN614_c0_g2	TRINITY_DN23700_c2_g1
OG0002822	NA	NA	DW	NA	NA	NA	NA	NA	NA	8	1	0	1	1	OG0002822	TRINITY_DN1054_c1_g1	TRINITY_DN19279_c3_g1	TRINITY_DN33138_c0_g1		TRINITY_DN24668_c2_g1	TRINITY_DN17601_c0_g1	TRINITY_DN17712_c5_g1	TRINITY_DN282_c4_g1	TRINITY_DN19565_c5_g1
OG0002823	NA	NA	DW	NA	NA	NA	NA	NA	NA	8	1	0	1	1	OG0002823	TRINITY_DN10552_c0_g2	TRINITY_DN17716_c3_g5	TRINITY_DN42304_c6_g2	TRINITY_DN21958_c10_g1	TRINITY_DN18494_c7_g1	TRINITY_DN12996_c6_g1	TRINITY_DN19632_c5_g3	TRINITY_DN719_c0_g2	TRINITY_DN20946_c7_g3
OG0002824	NA	NA	UP	NA	NA	NA	NA	NA	NA	8	0	1	1	1	OG0002824	TRINITY_DN10558_c0_g1	TRINITY_DN16393_c4_g1	TRINITY_DN42240_c6_g2	TRINITY_DN22201_c5_g1	TRINITY_DN24630_c5_g1	TRINITY_DN20534_c5_g4	TRINITY_DN18769_c5_g4	TRINITY_DN2896_c1_g1	TRINITY_DN21382_c3_g1
OG0002826	NA	NA	NA	NA	NA	NA	NA	NA	DW	8	1	0	1	1	OG0002826	TRINITY_DN10621_c0_g1	TRINITY_DN16209_c0_g1	TRINITY_DN48644_c1_g1	TRINITY_DN23157_c10_g1	TRINITY_DN22946_c9_g1	TRINITY_DN20364_c3_g1	TRINITY_DN20108_c3_g1	TRINITY_DN1830_c2_g1	TRINITY_DN22846_c3_g3
OG0002834	NA	NA	NA	NA	NA	NA	NA	NA	DW	8	1	0	1	1	OG0002834	TRINITY_DN1071_c0_g2	TRINITY_DN15443_c0_g1	TRINITY_DN42726_c4_g1	TRINITY_DN24512_c12_g2	TRINITY_DN19669_c8_g1	TRINITY_DN16444_c2_g1	TRINITY_DN11828_c0_g1	TRINITY_DN2374_c1_g2	TRINITY_DN19224_c11_g2
OG0002839	NA	NA	UP	NA	NA	NA	NA	NA	NA	8	0	1	1	1	OG0002839	TRINITY_DN10750_c0_g1		TRINITY_DN39332_c0_g2	TRINITY_DN21721_c3_g1	TRINITY_DN17613_c1_g1	TRINITY_DN11186_c0_g1	TRINITY_DN10298_c0_g1	TRINITY_DN3965_c6_g1	TRINITY_DN22112_c5_g1
OG0002859	NA	NA	UP	NA	NA	NA	NA	NA	NA	8	0	1	1	1	OG0002859	TRINITY_DN10908_c17_g1	TRINITY_DN18170_c4_g2	TRINITY_DN42669_c11_g1	TRINITY_DN22776_c6_g2	TRINITY_DN37746_c0_g1	TRINITY_DN15958_c2_g6	TRINITY_DN18618_c0_g1	TRINITY_DN11425_c2_g1	TRINITY_DN23782_c3_g3
OG0002871	NA	NA	NA	NA	NA	NA	NA	DW	NA	8	1	0	1	1	OG0002871	TRINITY_DN109_c7_g1	TRINITY_DN17483_c7_g1	TRINITY_DN48606_c0_g4	TRINITY_DN22820_c5_g6	TRINITY_DN20710_c1_g1	TRINITY_DN15574_c0_g2	TRINITY_DN19051_c1_g2		TRINITY_DN19215_c3_g1
OG0002876	NA	NA	UP	NA	NA	NA	NA	NA	NA	8	0	1	1	1	OG0002876	TRINITY_DN11033_c0_g2	TRINITY_DN16568_c9_g1	TRINITY_DN48533_c0_g2	TRINITY_DN24820_c8_g2	TRINITY_DN21660_c0_g1	TRINITY_DN20317_c5_g1	TRINITY_DN21344_c1_g1	TRINITY_DN865_c1_g1
OG0002881	NA	NA	NA	NA	NA	NA	NA	DW	NA	8	1	0	1	1	OG0002881	TRINITY_DN110_c0_g2	TRINITY_DN18766_c3_g1	TRINITY_DN48750_c3_g1	TRINITY_DN24924_c9_g1	TRINITY_DN21160_c4_g5	TRINITY_DN20191_c1_g1	TRINITY_DN20807_c2_g1
OG0002882	NA	NA	NA	NA	NA	NA	NA	NA	UP	8	0	1	1	1	OG0002882	TRINITY_DN11111_c1_g1	TRINITY_DN15869_c0_g1	TRINITY_DN41514_c0_g1	TRINITY_DN24034_c2_g1	TRINITY_DN23998_c2_g1	TRINITY_DN18390_c9_g1	TRINITY_DN19966_c4_g1	TRINITY_DN6477_c0_g3	TRINITY_DN20406_c0_g4
OG0002883	NA	NA	UP	NA	NA	NA	NA	NA	NA	8	0	1	1	1	OG0002883	TRINITY_DN11120_c0_g1	TRINITY_DN17633_c2_g4	TRINITY_DN40774_c0_g1	TRINITY_DN23297_c5_g2	TRINITY_DN21829_c0_g2	TRINITY_DN17505_c2_g1	TRINITY_DN21345_c2_g5	TRINITY_DN203_c0_g2	TRINITY_DN23029_c1_g1
OG0002892	NA	NA	NA	NA	NA	NA	NA	UP	NA	8	0	1	1	1	OG0002892	TRINITY_DN1120_c1_g1	TRINITY_DN19265_c9_g1	TRINITY_DN48334_c0_g1	TRINITY_DN24458_c5_g1	TRINITY_DN24929_c9_g1	TRINITY_DN15300_c2_g2	TRINITY_DN20797_c7_g1	TRINITY_DN182_c0_g4	TRINITY_DN19598_c7_g1
OG0002898	NA	NA	UP	NA	NA	NA	NA	NA	NA	8	0	1	1	1	OG0002898	TRINITY_DN11258_c0_g1	TRINITY_DN18069_c4_g2	TRINITY_DN44033_c0_g1	TRINITY_DN24087_c7_g1	TRINITY_DN18170_c4_g1	TRINITY_DN19164_c6_g1	TRINITY_DN20622_c5_g1	TRINITY_DN7_c1_g1	TRINITY_DN23766_c4_g1
OG0002903	DW	NA	NA	NA	NA	NA	NA	NA	NA	8	1	0	1	1	OG0002903	TRINITY_DN1127_c1_g1	TRINITY_DN18194_c3_g1	TRINITY_DN40880_c0_g1	TRINITY_DN22899_c2_g2	TRINITY_DN20426_c3_g1	TRINITY_DN18005_c1_g1	TRINITY_DN18008_c3_g1	TRINITY_DN2103_c0_g1	TRINITY_DN19846_c5_g3
OG0002909	NA	NA	UP	NA	NA	NA	NA	NA	NA	8	0	1	1	1	OG0002909	TRINITY_DN11307_c0_g1	TRINITY_DN19046_c10_g3	TRINITY_DN44308_c1_g1	TRINITY_DN22651_c4_g7	TRINITY_DN17391_c0_g1	TRINITY_DN13420_c5_g1	TRINITY_DN16311_c0_g1	TRINITY_DN513_c0_g3	TRINITY_DN23954_c5_g1
OG0002932	NA	NA	NA	NA	NA	NA	NA	DW	NA	8	1	0	1	1	OG0002932	TRINITY_DN11556_c5_g1	TRINITY_DN16915_c3_g6	TRINITY_DN53010_c0_g1	TRINITY_DN22092_c11_g4	TRINITY_DN21569_c7_g5	TRINITY_DN17456_c7_g2	TRINITY_DN20367_c5_g5
OG0002934	NA	NA	NA	NA	NA	NA	NA	NA	DW	8	1	0	1	1	OG0002934	TRINITY_DN11577_c2_g1	TRINITY_DN15493_c0_g1	TRINITY_DN48274_c0_g1	TRINITY_DN22546_c0_g1	TRINITY_DN18216_c0_g1	TRINITY_DN17648_c2_g2	TRINITY_DN12448_c0_g1	TRINITY_DN7403_c0_g2	TRINITY_DN22185_c4_g2
OG0002937	NA	NA	DW	NA	NA	NA	NA	NA	NA	8	1	0	1	1	OG0002937	TRINITY_DN1163_c15_g1	TRINITY_DN19781_c5_g1	TRINITY_DN44712_c3_g2	TRINITY_DN22876_c5_g1	TRINITY_DN18932_c6_g3	TRINITY_DN17673_c6_g1	TRINITY_DN19978_c8_g1	TRINITY_DN232_c0_g1	TRINITY_DN20442_c4_g1
OG0002950	NA	NA	NA	NA	NA	NA	NA	DW	NA	8	1	0	1	1	OG0002950	TRINITY_DN11809_c0_g1	TRINITY_DN17491_c4_g1	TRINITY_DN43760_c0_g1	TRINITY_DN19233_c0_g1	TRINITY_DN12079_c0_g1	TRINITY_DN18410_c6_g1	TRINITY_DN16491_c0_g1	TRINITY_DN5301_c0_g3
OG0002951	NA	NA	NA	NA	NA	NA	NA	UP	NA	8	0	1	1	1	OG0002951	TRINITY_DN11818_c0_g1	TRINITY_DN16852_c6_g1	TRINITY_DN44916_c0_g1	TRINITY_DN21418_c0_g1	TRINITY_DN19181_c6_g1	TRINITY_DN19348_c3_g1	TRINITY_DN16996_c0_g1	TRINITY_DN7102_c0_g1	TRINITY_DN18362_c7_g1
OG0002971	NA	NA	DW	NA	NA	NA	NA	NA	NA	8	1	0	1	1	OG0002971	TRINITY_DN1213_c2_g2	TRINITY_DN19483_c3_g1	TRINITY_DN46717_c1_g1	TRINITY_DN22831_c0_g1	TRINITY_DN22554_c3_g1	TRINITY_DN18662_c1_g2	TRINITY_DN17787_c2_g1	TRINITY_DN344_c0_g1	TRINITY_DN22405_c2_g1
OG0002974	NA	NA	NA	UP	NA	NA	NA	NA	NA	8	0	1	1	1	OG0002974	TRINITY_DN12149_c1_g3	TRINITY_DN19082_c0_g2	TRINITY_DN30986_c0_g2	TRINITY_DN16266_c0_g1	TRINITY_DN22398_c8_g1		TRINITY_DN14222_c0_g1	TRINITY_DN20532_c0_g1	TRINITY_DN21424_c1_g1
OG0002979	UP	NA	NA	NA	NA	NA	NA	NA	NA	8	0	1	1	1	OG0002979	TRINITY_DN121_c1_g2	TRINITY_DN16342_c2_g1	TRINITY_DN42012_c0_g7	TRINITY_DN22605_c17_g1	TRINITY_DN21523_c2_g2		TRINITY_DN21382_c9_g2	TRINITY_DN10647_c0_g1	TRINITY_DN18663_c5_g4
OG0002989	NA	NA	NA	NA	NA	NA	NA	DW	NA	8	1	0	1	1	OG0002989	TRINITY_DN1227_c1_g2	TRINITY_DN18766_c2_g1	TRINITY_DN44477_c4_g1	TRINITY_DN24372_c8_g2	TRINITY_DN23426_c7_g2	TRINITY_DN16387_c6_g3	TRINITY_DN19152_c3_g2		TRINITY_DN19017_c8_g1
OG0002998	NA	NA	NA	NA	NA	NA	NA	NA	DW	8	1	0	1	1	OG0002998	TRINITY_DN1234_c0_g2	TRINITY_DN16883_c3_g1	TRINITY_DN48609_c5_g1	TRINITY_DN22843_c6_g1	TRINITY_DN24415_c9_g1	TRINITY_DN21075_c8_g2	TRINITY_DN20114_c6_g1	TRINITY_DN1159_c0_g2	TRINITY_DN23135_c6_g1
OG0003006	NA	NA	UP	NA	NA	NA	NA	NA	NA	8	0	1	1	1	OG0003006	TRINITY_DN1243_c1_g1	TRINITY_DN18833_c2_g1	TRINITY_DN40232_c0_g1	TRINITY_DN20989_c0_g1	TRINITY_DN24726_c2_g1	TRINITY_DN16434_c0_g1	TRINITY_DN16539_c0_g1	TRINITY_DN6516_c0_g3	TRINITY_DN23762_c14_g3
OG0003008	NA	NA	UP	NA	NA	NA	NA	NA	NA	8	0	1	1	1	OG0003008	TRINITY_DN12451_c0_g1	TRINITY_DN15452_c0_g1	TRINITY_DN41943_c0_g1	TRINITY_DN23170_c5_g1	TRINITY_DN20031_c0_g1	TRINITY_DN13962_c4_g1	TRINITY_DN20736_c5_g2	TRINITY_DN61_c0_g3	TRINITY_DN21423_c1_g3
OG0003011	NA	NA	UP	NA	NA	NA	NA	NA	NA	8	0	1	1	1	OG0003011	TRINITY_DN1245_c0_g3	TRINITY_DN14795_c0_g1	TRINITY_DN39516_c0_g1	TRINITY_DN21792_c1_g1	TRINITY_DN25287_c4_g1	TRINITY_DN14599_c6_g1	TRINITY_DN18546_c5_g1	TRINITY_DN11151_c0_g1	TRINITY_DN18907_c12_g1
OG0003013	NA	NA	DW	NA	NA	NA	NA	NA	NA	8	1	0	1	1	OG0003013	TRINITY_DN12468_c6_g1		TRINITY_DN44037_c5_g3	TRINITY_DN22247_c7_g2	TRINITY_DN21265_c2_g1	TRINITY_DN19468_c5_g1	TRINITY_DN19069_c7_g3	TRINITY_DN4569_c0_g1	TRINITY_DN23333_c0_g2
OG0003023	NA	NA	DW	NA	NA	NA	NA	NA	NA	8	1	0	1	1	OG0003023	TRINITY_DN12539_c0_g3	TRINITY_DN19288_c10_g4	TRINITY_DN42897_c7_g1	TRINITY_DN22623_c2_g1	TRINITY_DN19705_c6_g2	TRINITY_DN18779_c3_g1		TRINITY_DN5342_c0_g2	TRINITY_DN20276_c5_g3
OG0003037	NA	NA	NA	NA	NA	NA	NA	DW	NA	8	1	0	1	1	OG0003037	TRINITY_DN126_c2_g6	TRINITY_DN18509_c5_g3	TRINITY_DN46075_c0_g1	TRINITY_DN22272_c12_g1	TRINITY_DN21572_c9_g1	TRINITY_DN14937_c6_g1	TRINITY_DN20756_c8_g1		TRINITY_DN39967_c0_g1
OG0003038	NA	NA	NA	NA	NA	NA	NA	DW	NA	8	1	0	1	1	OG0003038	TRINITY_DN126_c4_g1	TRINITY_DN18030_c6_g3	TRINITY_DN48611_c0_g2	TRINITY_DN24015_c4_g1	TRINITY_DN23839_c2_g1	TRINITY_DN19360_c7_g1	TRINITY_DN18163_c0_g1		TRINITY_DN23673_c7_g1
OG0003042	NA	NA	NA	NA	NA	NA	NA	DW	NA	8	1	0	1	1	OG0003042	TRINITY_DN1276_c1_g1	TRINITY_DN19428_c11_g8	TRINITY_DN47066_c0_g2	TRINITY_DN22092_c12_g1	TRINITY_DN19170_c3_g2		TRINITY_DN19742_c2_g1	TRINITY_DN3537_c0_g1	TRINITY_DN20298_c4_g4
OG0003054	UP	NA	NA	NA	NA	NA	NA	NA	NA	8	0	1	1	1	OG0003054	TRINITY_DN1291_c7_g2	TRINITY_DN16340_c4_g1	TRINITY_DN43210_c3_g1	TRINITY_DN23500_c0_g1	TRINITY_DN19580_c0_g2	TRINITY_DN19656_c6_g1	TRINITY_DN15233_c0_g1	TRINITY_DN984_c1_g1	TRINITY_DN20689_c3_g2
OG0003065	NA	NA	UP	NA	NA	NA	NA	NA	NA	8	0	1	1	1	OG0003065	TRINITY_DN13012_c0_g1	TRINITY_DN15972_c0_g1	TRINITY_DN45680_c4_g1	TRINITY_DN23240_c0_g4	TRINITY_DN20181_c2_g1	TRINITY_DN20071_c9_g2	TRINITY_DN17440_c0_g2	TRINITY_DN4665_c0_g1	TRINITY_DN20493_c2_g1
OG0003066	NA	NA	UP	NA	NA	NA	NA	NA	NA	8	0	1	1	1	OG0003066	TRINITY_DN13013_c1_g1	TRINITY_DN16696_c6_g3	TRINITY_DN35137_c0_g1	TRINITY_DN57580_c0_g1	TRINITY_DN18938_c1_g1	TRINITY_DN16386_c7_g1	TRINITY_DN17037_c0_g4	TRINITY_DN2647_c0_g2
OG0003077	NA	NA	NA	NA	NA	NA	NA	UP	NA	8	0	1	1	1	OG0003077	TRINITY_DN1311_c0_g1	TRINITY_DN19116_c5_g1	TRINITY_DN46860_c1_g1	TRINITY_DN24303_c8_g1	TRINITY_DN21295_c3_g5	TRINITY_DN21359_c7_g1	TRINITY_DN18793_c3_g1	TRINITY_DN3776_c2_g2	TRINITY_DN23026_c8_g1
OG0003089	DW	NA	NA	NA	NA	NA	NA	NA	NA	8	1	0	1	1	OG0003089	TRINITY_DN13207_c0_g1	TRINITY_DN38781_c0_g1	TRINITY_DN44971_c0_g1	TRINITY_DN24118_c5_g4	TRINITY_DN22122_c3_g5	TRINITY_DN17319_c14_g3	TRINITY_DN16747_c0_g1	TRINITY_DN13247_c2_g2	TRINITY_DN22871_c0_g1
OG0003107	NA	NA	NA	DW	NA	NA	NA	NA	NA	8	1	0	1	1	OG0003107	TRINITY_DN13447_c2_g1	TRINITY_DN16865_c2_g5	TRINITY_DN45122_c2_g1	TRINITY_DN22281_c9_g1	TRINITY_DN18228_c13_g1	TRINITY_DN12585_c5_g5	TRINITY_DN2122_c0_g1	TRINITY_DN7957_c0_g5	TRINITY_DN19262_c2_g1
OG0003117	NA	NA	NA	NA	NA	NA	NA	UP	NA	8	0	1	1	1	OG0003117	TRINITY_DN1357_c0_g1	TRINITY_DN19451_c9_g1	TRINITY_DN43899_c0_g1	TRINITY_DN21057_c0_g1	TRINITY_DN17943_c0_g1	TRINITY_DN19466_c7_g2	TRINITY_DN19022_c6_g3	TRINITY_DN3741_c0_g1	TRINITY_DN21935_c3_g1
OG0003119	NA	NA	NA	NA	NA	NA	NA	UP	NA	8	0	1	1	1	OG0003119	TRINITY_DN135_c0_g2	TRINITY_DN18844_c7_g4	TRINITY_DN44745_c0_g1	TRINITY_DN23081_c6_g1	TRINITY_DN23509_c5_g2	TRINITY_DN20987_c4_g1	TRINITY_DN18277_c3_g5	TRINITY_DN2567_c2_g3	TRINITY_DN22535_c9_g1
OG0003136	NA	NA	NA	NA	NA	NA	NA	UP	NA	8	0	1	1	1	OG0003136	TRINITY_DN1383_c1_g2	TRINITY_DN17044_c6_g1	TRINITY_DN40129_c0_g1	TRINITY_DN22404_c1_g1	TRINITY_DN17378_c0_g1	TRINITY_DN12517_c4_g1	TRINITY_DN17652_c6_g2	TRINITY_DN4238_c0_g2	TRINITY_DN20937_c6_g2
OG0003143	NA	NA	DW	NA	NA	NA	NA	NA	NA	8	1	0	1	1	OG0003143	TRINITY_DN1393_c0_g2	TRINITY_DN18237_c0_g1	TRINITY_DN46994_c5_g1	TRINITY_DN22444_c5_g1	TRINITY_DN21610_c7_g1	TRINITY_DN20004_c4_g1	TRINITY_DN20836_c9_g3	TRINITY_DN2284_c0_g1	TRINITY_DN23643_c9_g1
OG0003148	NA	NA	NA	NA	NA	NA	NA	NA	UP	8	0	1	1	1	OG0003148	TRINITY_DN13_c0_g4	TRINITY_DN17983_c3_g1	TRINITY_DN41830_c3_g1	TRINITY_DN23484_c7_g3	TRINITY_DN18166_c7_g1	TRINITY_DN13333_c7_g2	TRINITY_DN20596_c2_g1	TRINITY_DN2898_c0_g1	TRINITY_DN22848_c3_g1
OG0003153	NA	NA	DW	NA	NA	NA	NA	NA	NA	8	1	0	1	1	OG0003153	TRINITY_DN1404_c0_g1	TRINITY_DN19517_c2_g1	TRINITY_DN47398_c0_g1	TRINITY_DN22718_c1_g2	TRINITY_DN22141_c13_g1	TRINITY_DN19155_c6_g1	TRINITY_DN20623_c3_g2	TRINITY_DN1715_c1_g2	TRINITY_DN20734_c1_g2
OG0003159	NA	NA	UP	NA	NA	NA	NA	NA	NA	8	0	1	1	1	OG0003159	TRINITY_DN14116_c3_g1	TRINITY_DN17710_c10_g5	TRINITY_DN38989_c0_g1	TRINITY_DN24330_c2_g1	TRINITY_DN18266_c7_g1	TRINITY_DN19601_c5_g6	TRINITY_DN18372_c6_g5	TRINITY_DN432_c0_g4	TRINITY_DN21451_c3_g1
OG0003165	NA	NA	UP	NA	NA	NA	NA	NA	NA	8	0	1	1	1	OG0003165	TRINITY_DN1418_c7_g1	TRINITY_DN16621_c0_g1	TRINITY_DN45938_c2_g1	TRINITY_DN22523_c12_g1	TRINITY_DN22928_c2_g2	TRINITY_DN21209_c8_g1	TRINITY_DN17846_c7_g2	TRINITY_DN795_c3_g2	TRINITY_DN22066_c1_g1
OG0003167	NA	NA	UP	NA	NA	NA	NA	NA	NA	8	0	1	1	1	OG0003167	TRINITY_DN1419_c0_g2	TRINITY_DN18474_c1_g1	TRINITY_DN47532_c4_g3	TRINITY_DN20212_c0_g1	TRINITY_DN19703_c6_g2	TRINITY_DN15714_c5_g3	TRINITY_DN16782_c0_g1	TRINITY_DN10896_c0_g2	TRINITY_DN22402_c4_g1
OG0003168	UP	NA	NA	NA	NA	NA	NA	NA	NA	8	0	1	1	1	OG0003168	TRINITY_DN141_c1_g2	TRINITY_DN19126_c4_g1	TRINITY_DN48791_c1_g3	TRINITY_DN21621_c0_g1	TRINITY_DN22824_c2_g3	TRINITY_DN15592_c4_g1	TRINITY_DN18815_c2_g1	TRINITY_DN1009_c2_g4	TRINITY_DN21915_c1_g1
OG0003171	DW	NA	NA	NA	NA	NA	NA	NA	NA	8	1	0	1	1	OG0003171	TRINITY_DN14222_c8_g1	TRINITY_DN16705_c2_g9	TRINITY_DN42561_c5_g2	TRINITY_DN24616_c1_g5	TRINITY_DN24489_c1_g1	TRINITY_DN19263_c7_g4	TRINITY_DN17564_c8_g9	TRINITY_DN6452_c1_g2	TRINITY_DN19461_c5_g1
OG0003184	NA	NA	NA	NA	NA	NA	NA	NA	DW	8	1	0	1	1	OG0003184	TRINITY_DN1434_c0_g2	TRINITY_DN18169_c1_g2	TRINITY_DN48276_c4_g1	TRINITY_DN24271_c6_g1	TRINITY_DN24049_c5_g2	TRINITY_DN15718_c6_g1	TRINITY_DN18536_c8_g2	TRINITY_DN2239_c0_g2	TRINITY_DN21684_c3_g1
OG0003196	NA	NA	NA	NA	NA	NA	NA	DW	NA	8	1	0	1	1	OG0003196	TRINITY_DN1445_c5_g3	TRINITY_DN16958_c1_g12	TRINITY_DN42784_c1_g1	TRINITY_DN22557_c8_g2	TRINITY_DN20204_c5_g3	TRINITY_DN16618_c8_g1	TRINITY_DN20376_c5_g1		TRINITY_DN54498_c0_g1
OG0003199	NA	NA	NA	NA	NA	NA	NA	DW	NA	8	1	0	1	1	OG0003199	TRINITY_DN1446_c0_g1	TRINITY_DN18075_c4_g2	TRINITY_DN46235_c1_g1	TRINITY_DN24391_c4_g1	TRINITY_DN19786_c0_g3	TRINITY_DN16818_c2_g3	TRINITY_DN20333_c7_g4
OG0003202	NA	NA	NA	NA	NA	NA	NA	DW	NA	8	1	0	1	1	OG0003202	TRINITY_DN144_c5_g1	TRINITY_DN18352_c4_g1	TRINITY_DN47566_c5_g1	TRINITY_DN22602_c6_g2	TRINITY_DN21976_c0_g1	TRINITY_DN19571_c2_g1	TRINITY_DN19041_c5_g2		TRINITY_DN19784_c7_g3
OG0003212	NA	NA	UP	NA	NA	NA	NA	NA	NA	8	0	1	1	1	OG0003212	TRINITY_DN1459_c1_g1	TRINITY_DN20041_c0_g1	TRINITY_DN43734_c3_g1	TRINITY_DN21910_c4_g2	TRINITY_DN16693_c0_g1	TRINITY_DN32962_c0_g1	TRINITY_DN1425_c0_g1	TRINITY_DN16586_c2_g1	TRINITY_DN21573_c6_g3
OG0003213	NA	NA	NA	NA	NA	NA	NA	DW	NA	8	1	0	1	1	OG0003213	TRINITY_DN145_c2_g2	TRINITY_DN16223_c12_g3	TRINITY_DN44287_c6_g1	TRINITY_DN21491_c11_g1	TRINITY_DN23362_c8_g1	TRINITY_DN14410_c7_g1	TRINITY_DN19149_c8_g5	TRINITY_DN3979_c0_g2	TRINITY_DN22845_c4_g4
OG0003218	NA	NA	NA	NA	NA	NA	NA	NA	DW	8	1	0	1	1	OG0003218	TRINITY_DN14710_c1_g1	TRINITY_DN17791_c2_g2	TRINITY_DN32442_c0_g1	TRINITY_DN11018_c0_g2	TRINITY_DN18013_c0_g1	TRINITY_DN16811_c4_g1	TRINITY_DN17038_c0_g2	TRINITY_DN5603_c1_g1	TRINITY_DN19426_c2_g3
OG0003219	UP	NA	NA	NA	NA	NA	NA	NA	NA	8	0	1	1	1	OG0003219	TRINITY_DN14720_c0_g2	TRINITY_DN18226_c5_g2	TRINITY_DN45044_c7_g1	TRINITY_DN23376_c12_g1	TRINITY_DN17896_c0_g1	TRINITY_DN16659_c4_g1	TRINITY_DN19751_c6_g1	TRINITY_DN15268_c0_g2	TRINITY_DN19407_c5_g2
OG0003222	NA	NA	NA	NA	NA	NA	NA	DW	NA	8	1	0	1	1	OG0003222	TRINITY_DN14742_c0_g2	TRINITY_DN14816_c0_g1	TRINITY_DN40451_c0_g1	TRINITY_DN18092_c0_g2	TRINITY_DN21489_c4_g2	TRINITY_DN14404_c3_g2	TRINITY_DN43183_c0_g1	TRINITY_DN6408_c0_g2	TRINITY_DN23408_c5_g1
OG0003224	NA	NA	UP	NA	NA	NA	NA	NA	NA	8	0	1	1	1	OG0003224	TRINITY_DN14757_c1_g1	TRINITY_DN16344_c7_g1	TRINITY_DN45325_c2_g1	TRINITY_DN22745_c6_g2	TRINITY_DN25640_c0_g1	TRINITY_DN18798_c5_g2	TRINITY_DN18710_c3_g3	TRINITY_DN2062_c0_g2	TRINITY_DN22751_c2_g4
OG0003229	NA	NA	NA	NA	NA	NA	NA	UP	NA	8	0	1	1	1	OG0003229	TRINITY_DN1481_c3_g2	TRINITY_DN16247_c4_g1	TRINITY_DN41206_c0_g1	TRINITY_DN21685_c12_g9	TRINITY_DN23840_c2_g4	TRINITY_DN15769_c0_g1	TRINITY_DN21175_c8_g2	TRINITY_DN3022_c1_g3	TRINITY_DN18044_c6_g6
OG0003241	NA	NA	NA	NA	NA	NA	NA	DW	NA	8	1	0	1	1	OG0003241	TRINITY_DN1498_c0_g2	TRINITY_DN17253_c8_g1	TRINITY_DN47987_c0_g1	TRINITY_DN22020_c2_g1	TRINITY_DN23165_c6_g1	TRINITY_DN21309_c7_g1	TRINITY_DN19712_c4_g1		TRINITY_DN22614_c10_g1
OG0003254	NA	NA	NA	NA	NA	NA	NA	UP	NA	8	0	1	1	1	OG0003254	TRINITY_DN150_c4_g1	TRINITY_DN18646_c2_g1	TRINITY_DN48149_c3_g2	TRINITY_DN23746_c6_g1	TRINITY_DN23620_c4_g1	TRINITY_DN21052_c9_g1	TRINITY_DN20349_c6_g1	TRINITY_DN1743_c0_g2	TRINITY_DN20295_c3_g2
OG0003257	NA	NA	NA	NA	NA	NA	NA	NA	DW	8	1	0	1	1	OG0003257	TRINITY_DN15155_c6_g1	TRINITY_DN14452_c0_g1	TRINITY_DN62914_c0_g1	TRINITY_DN19858_c0_g1	TRINITY_DN19562_c1_g1	TRINITY_DN21048_c6_g1	TRINITY_DN35828_c0_g1	TRINITY_DN3731_c0_g1	TRINITY_DN21118_c8_g10
OG0003260	NA	NA	NA	NA	UP	NA	NA	NA	NA	8	0	1	1	1	OG0003260	TRINITY_DN15198_c0_g1	TRINITY_DN17785_c6_g4	TRINITY_DN46812_c16_g1	TRINITY_DN22660_c7_g2	TRINITY_DN24204_c7_g1	TRINITY_DN16039_c8_g1	TRINITY_DN21222_c4_g1	TRINITY_DN40306_c0_g1	TRINITY_DN22114_c10_g1
OG0003267	NA	NA	NA	NA	NA	NA	NA	DW	NA	8	1	0	1	1	OG0003267	TRINITY_DN1529_c0_g2	TRINITY_DN15900_c0_g1	TRINITY_DN42022_c0_g2	TRINITY_DN21289_c0_g1	TRINITY_DN19698_c3_g3	TRINITY_DN21422_c8_g1	TRINITY_DN18230_c4_g1		TRINITY_DN22105_c6_g1
OG0003272	NA	NA	DW	NA	NA	NA	NA	NA	NA	8	1	0	1	1	OG0003272	TRINITY_DN15404_c0_g2	TRINITY_DN16542_c3_g2	TRINITY_DN43895_c0_g1	TRINITY_DN21677_c9_g1	TRINITY_DN24754_c7_g1	TRINITY_DN18582_c4_g1	TRINITY_DN18845_c6_g1	TRINITY_DN1105_c1_g1	TRINITY_DN18773_c5_g1
OG0003273	NA	NA	UP	NA	NA	NA	NA	NA	NA	8	0	1	1	1	OG0003273	TRINITY_DN1541_c1_g2	TRINITY_DN15950_c0_g1	TRINITY_DN41088_c1_g1	TRINITY_DN21983_c1_g1	TRINITY_DN19823_c1_g1	TRINITY_DN13859_c1_g1	TRINITY_DN18929_c7_g1	TRINITY_DN1930_c0_g2	TRINITY_DN19115_c6_g2
OG0003290	NA	NA	NA	NA	NA	NA	NA	NA	DW	8	1	0	1	1	OG0003290	TRINITY_DN15646_c0_g1	TRINITY_DN18790_c5_g1	TRINITY_DN43890_c3_g1	TRINITY_DN23994_c6_g3	TRINITY_DN20173_c6_g1	TRINITY_DN19010_c6_g1	TRINITY_DN18295_c7_g2	TRINITY_DN18113_c0_g1	TRINITY_DN20078_c1_g2
OG0003301	NA	NA	NA	NA	UP	NA	NA	NA	NA	8	0	1	1	1	OG0003301	TRINITY_DN15831_c8_g1	TRINITY_DN13525_c0_g1	TRINITY_DN73067_c0_g1		TRINITY_DN20306_c1_g1	TRINITY_DN31518_c0_g1		TRINITY_DN35942_c0_g1	TRINITY_DN21334_c4_g2
OG0003307	NA	NA	DW	NA	NA	NA	NA	NA	NA	8	1	0	1	1	OG0003307	TRINITY_DN15940_c2_g4	TRINITY_DN18200_c4_g1	TRINITY_DN43727_c2_g1	TRINITY_DN21307_c0_g1	TRINITY_DN21974_c9_g1	TRINITY_DN16439_c5_g1	TRINITY_DN19501_c3_g1	TRINITY_DN695_c0_g1	TRINITY_DN22017_c8_g1
OG0003316	NA	NA	NA	NA	NA	NA	NA	DW	NA	8	1	0	1	1	OG0003316	TRINITY_DN16006_c0_g1	TRINITY_DN15494_c0_g1	TRINITY_DN42355_c1_g1	TRINITY_DN23561_c4_g1	TRINITY_DN22343_c3_g1	TRINITY_DN21371_c7_g1	TRINITY_DN12237_c0_g1		TRINITY_DN30064_c0_g1
OG0003320	NA	NA	UP	NA	NA	NA	NA	NA	NA	8	0	1	1	1	OG0003320	TRINITY_DN16020_c0_g2	TRINITY_DN14053_c0_g1	TRINITY_DN44500_c3_g4	TRINITY_DN21422_c0_g1	TRINITY_DN19437_c0_g1	TRINITY_DN19474_c9_g4	TRINITY_DN15408_c0_g1	TRINITY_DN1482_c0_g1	TRINITY_DN22731_c5_g1
OG0003321	NA	NA	UP	NA	NA	NA	NA	NA	NA	8	0	1	1	1	OG0003321	TRINITY_DN16022_c1_g1	TRINITY_DN19052_c4_g2	TRINITY_DN46124_c1_g1	TRINITY_DN24567_c2_g3	TRINITY_DN17518_c0_g1	TRINITY_DN16648_c6_g1	TRINITY_DN19634_c2_g2	TRINITY_DN3111_c0_g1	TRINITY_DN21849_c5_g1
OG0003328	NA	NA	NA	NA	NA	NA	NA	DW	NA	8	1	0	1	1	OG0003328	TRINITY_DN160_c0_g1	TRINITY_DN19084_c4_g4	TRINITY_DN46398_c0_g1	TRINITY_DN24511_c1_g1	TRINITY_DN24344_c2_g7	TRINITY_DN8041_c0_g1			TRINITY_DN35151_c0_g1
OG0003339	NA	NA	NA	NA	NA	NA	NA	NA	DW	8	1	0	1	1	OG0003339	TRINITY_DN16270_c0_g2	TRINITY_DN15531_c0_g1	TRINITY_DN45449_c3_g1	TRINITY_DN20782_c0_g1	TRINITY_DN25043_c5_g4	TRINITY_DN13768_c1_g1	TRINITY_DN19256_c5_g1	TRINITY_DN5450_c0_g2	TRINITY_DN21131_c7_g1
OG0003346	NA	NA	DW	NA	NA	NA	NA	NA	NA	8	1	0	1	1	OG0003346	TRINITY_DN1631_c1_g3	TRINITY_DN18491_c3_g1	TRINITY_DN45742_c6_g2	TRINITY_DN23617_c2_g1		TRINITY_DN19903_c4_g5		TRINITY_DN62_c0_g2	TRINITY_DN21241_c4_g1
OG0003347	NA	NA	NA	NA	NA	NA	NA	DW	NA	8	1	0	1	1	OG0003347	TRINITY_DN1632_c1_g2	TRINITY_DN18259_c3_g10	TRINITY_DN43680_c9_g1	TRINITY_DN23509_c8_g4	TRINITY_DN19678_c2_g1	TRINITY_DN17921_c6_g1	TRINITY_DN18186_c4_g1
OG0003348	NA	NA	DW	NA	NA	NA	NA	NA	NA	8	1	0	1	1	OG0003348	TRINITY_DN1632_c4_g1	TRINITY_DN19062_c6_g1	TRINITY_DN48925_c3_g1	TRINITY_DN24263_c8_g1	TRINITY_DN24610_c5_g1	TRINITY_DN20173_c4_g1	TRINITY_DN19702_c0_g1	TRINITY_DN1666_c0_g1	TRINITY_DN23090_c3_g1
OG0003353	NA	NA	DW	NA	NA	NA	NA	NA	NA	8	1	0	1	1	OG0003353	TRINITY_DN163_c1_g3	TRINITY_DN18072_c8_g1	TRINITY_DN47514_c6_g1	TRINITY_DN23005_c11_g1	TRINITY_DN21646_c6_g2	TRINITY_DN16154_c6_g1	TRINITY_DN20005_c4_g5	TRINITY_DN3112_c3_g1	TRINITY_DN23707_c5_g3
OG0003354	NA	NA	DW	NA	NA	NA	NA	NA	NA	8	1	0	1	1	OG0003354	TRINITY_DN16445_c0_g1	TRINITY_DN15955_c0_g2	TRINITY_DN43204_c7_g1	TRINITY_DN22502_c8_g2	TRINITY_DN23351_c3_g1	TRINITY_DN12818_c6_g1	TRINITY_DN21112_c10_g8	TRINITY_DN1757_c0_g1	TRINITY_DN18468_c8_g4
OG0003355	NA	NA	NA	NA	NA	NA	NA	DW	NA	8	1	0	1	1	OG0003355	TRINITY_DN1645_c0_g2	TRINITY_DN17642_c8_g1	TRINITY_DN47490_c0_g1	TRINITY_DN24879_c6_g3	TRINITY_DN24822_c10_g1	TRINITY_DN20788_c4_g1	TRINITY_DN18751_c6_g1		TRINITY_DN21869_c3_g2
OG0003356	DW	NA	NA	NA	NA	NA	NA	NA	NA	8	1	0	1	1	OG0003356	TRINITY_DN16464_c0_g1	TRINITY_DN15201_c0_g1	TRINITY_DN43771_c0_g1	TRINITY_DN22020_c1_g1	TRINITY_DN20979_c6_g4	TRINITY_DN15848_c1_g1	TRINITY_DN16257_c0_g1	TRINITY_DN10429_c3_g1	TRINITY_DN47530_c0_g1
OG0003362	UP	NA	NA	NA	NA	NA	NA	NA	NA	8	0	1	1	1	OG0003362	TRINITY_DN16533_c1_g1	TRINITY_DN2052_c0_g1	TRINITY_DN43004_c0_g1	TRINITY_DN22925_c7_g1	TRINITY_DN17791_c0_g1	TRINITY_DN18509_c2_g2	TRINITY_DN16267_c0_g3	TRINITY_DN278_c0_g4	TRINITY_DN20989_c0_g3
OG0003368	NA	NA	NA	NA	NA	NA	NA	UP	NA	8	0	1	1	1	OG0003368	TRINITY_DN16615_c0_g1	TRINITY_DN15492_c0_g1	TRINITY_DN42992_c0_g1	TRINITY_DN18206_c0_g1	TRINITY_DN21454_c4_g1	TRINITY_DN21340_c7_g1	TRINITY_DN16818_c0_g1	TRINITY_DN4222_c0_g2	TRINITY_DN21698_c4_g1
OG0003375	NA	NA	NA	NA	NA	NA	NA	DW	NA	8	1	0	1	1	OG0003375	TRINITY_DN1675_c0_g1	TRINITY_DN17111_c4_g2	TRINITY_DN44090_c0_g1	TRINITY_DN21128_c0_g1	TRINITY_DN22613_c7_g1	TRINITY_DN15974_c8_g1	TRINITY_DN17269_c0_g1		TRINITY_DN21559_c6_g1
OG0003377	NA	NA	NA	NA	NA	NA	NA	UP	NA	8	0	1	1	1	OG0003377	TRINITY_DN16786_c0_g2	TRINITY_DN18958_c1_g2	TRINITY_DN31110_c0_g1	TRINITY_DN37055_c0_g1	TRINITY_DN7941_c0_g1	TRINITY_DN21249_c3_g2	TRINITY_DN20477_c6_g3	TRINITY_DN7089_c0_g1
OG0003386	NA	NA	DW	NA	NA	NA	NA	NA	NA	8	1	0	1	1	OG0003386	TRINITY_DN1696_c0_g2	TRINITY_DN18912_c8_g1	TRINITY_DN41883_c0_g1	TRINITY_DN23519_c2_g1	TRINITY_DN24763_c7_g1	TRINITY_DN18479_c1_g1	TRINITY_DN16671_c0_g1	TRINITY_DN1437_c1_g1	TRINITY_DN18262_c10_g1
OG0003395	NA	NA	NA	NA	NA	NA	NA	DW	NA	8	1	0	1	1	OG0003395	TRINITY_DN17009_c0_g2	TRINITY_DN1960_c0_g1	TRINITY_DN47186_c1_g5	TRINITY_DN14345_c0_g1	TRINITY_DN49173_c0_g1	TRINITY_DN14490_c10_g1	TRINITY_DN18128_c5_g2		TRINITY_DN21520_c5_g1
OG0003396	NA	NA	NA	NA	NA	NA	NA	UP	NA	8	0	1	1	1	OG0003396	TRINITY_DN17015_c2_g1	TRINITY_DN16230_c0_g3	TRINITY_DN46657_c0_g1	TRINITY_DN20420_c0_g1	TRINITY_DN20283_c0_g1	TRINITY_DN13508_c0_g1	TRINITY_DN17121_c0_g1	TRINITY_DN667_c1_g3	TRINITY_DN18985_c1_g9
OG0003397	NA	NA	NA	NA	NA	NA	UP	NA	NA	8	0	1	1	1	OG0003397	TRINITY_DN1702_c3_g1	TRINITY_DN17393_c0_g1	TRINITY_DN47949_c1_g1	TRINITY_DN23089_c8_g5	TRINITY_DN21028_c6_g1	TRINITY_DN12169_c0_g2	TRINITY_DN17877_c0_g1	TRINITY_DN4029_c0_g1	TRINITY_DN22892_c4_g2
OG0003411	NA	NA	UP	NA	NA	NA	NA	NA	NA	8	0	1	1	1	OG0003411	TRINITY_DN172_c6_g2	TRINITY_DN18827_c5_g8	TRINITY_DN46482_c5_g1	TRINITY_DN24008_c3_g2		TRINITY_DN13226_c7_g5	TRINITY_DN20568_c2_g3	TRINITY_DN965_c1_g5	TRINITY_DN21001_c8_g1
OG0003425	NA	NA	UP	NA	NA	NA	NA	NA	NA	8	0	1	1	1	OG0003425	TRINITY_DN1758_c0_g1		TRINITY_DN44332_c1_g1	TRINITY_DN22468_c6_g3	TRINITY_DN22445_c4_g1	TRINITY_DN16371_c0_g1	TRINITY_DN17494_c0_g1	TRINITY_DN5481_c1_g1	TRINITY_DN20180_c2_g3
OG0003430	NA	NA	NA	NA	NA	NA	NA	UP	NA	8	0	1	1	1	OG0003430	TRINITY_DN17648_c1_g1	TRINITY_DN15988_c0_g1	TRINITY_DN46708_c2_g1	TRINITY_DN22407_c3_g2	TRINITY_DN24327_c4_g1	TRINITY_DN15339_c4_g1	TRINITY_DN19228_c4_g1	TRINITY_DN10739_c0_g2	TRINITY_DN18803_c5_g1
OG0003434	NA	NA	NA	NA	NA	NA	NA	UP	NA	8	0	1	1	1	OG0003434	TRINITY_DN17689_c1_g2	TRINITY_DN17552_c6_g2	TRINITY_DN42507_c6_g1	TRINITY_DN21811_c5_g3	TRINITY_DN21022_c2_g1	TRINITY_DN19430_c1_g1	TRINITY_DN20678_c5_g1	TRINITY_DN1049_c2_g2	TRINITY_DN18291_c6_g2
OG0003440	NA	NA	NA	DW	NA	NA	NA	NA	NA	8	1	0	1	1	OG0003440	TRINITY_DN17715_c1_g1		TRINITY_DN41130_c0_g1	TRINITY_DN22250_c6_g1	TRINITY_DN20676_c4_g1	TRINITY_DN14246_c3_g1	TRINITY_DN16589_c0_g1	TRINITY_DN1595_c2_g1	TRINITY_DN22152_c2_g2
OG0003443	NA	NA	DW	NA	NA	NA	NA	NA	NA	8	1	0	1	1	OG0003443	TRINITY_DN1773_c0_g1	TRINITY_DN18322_c3_g3	TRINITY_DN45864_c8_g1	TRINITY_DN22207_c2_g1	TRINITY_DN24576_c5_g3	TRINITY_DN17765_c5_g2	TRINITY_DN19904_c4_g1	TRINITY_DN4029_c1_g2	TRINITY_DN20333_c6_g1
OG0003447	NA	NA	NA	NA	NA	NA	NA	DW	NA	8	1	0	1	1	OG0003447	TRINITY_DN17798_c20_g1	TRINITY_DN47686_c0_g1	TRINITY_DN40757_c0_g1	TRINITY_DN24831_c4_g4	TRINITY_DN18985_c13_g1	TRINITY_DN15627_c1_g1	TRINITY_DN19033_c14_g1		TRINITY_DN22412_c7_g1
OG0003451	NA	NA	NA	NA	NA	NA	NA	DW	NA	8	1	0	1	1	OG0003451	TRINITY_DN1784_c0_g1	TRINITY_DN18766_c0_g1	TRINITY_DN40762_c0_g1	TRINITY_DN24277_c11_g1	TRINITY_DN17226_c0_g1	TRINITY_DN16254_c6_g2	TRINITY_DN18041_c7_g1	TRINITY_DN1106_c2_g1	TRINITY_DN18129_c9_g2
OG0003453	NA	NA	NA	NA	NA	NA	NA	NA	DW	8	1	0	1	1	OG0003453	TRINITY_DN17874_c0_g1	TRINITY_DN15811_c0_g1	TRINITY_DN43971_c0_g1	TRINITY_DN21807_c2_g3	TRINITY_DN12722_c0_g1	TRINITY_DN17206_c4_g4	TRINITY_DN21228_c1_g6	TRINITY_DN6855_c0_g1	TRINITY_DN19023_c6_g3
OG0003455	NA	NA	NA	NA	NA	NA	UP	NA	NA	8	0	1	1	1	OG0003455	TRINITY_DN17946_c0_g2	TRINITY_DN16289_c10_g3	TRINITY_DN42513_c1_g1	TRINITY_DN21323_c0_g1	TRINITY_DN18597_c6_g1	TRINITY_DN18827_c6_g2	TRINITY_DN15944_c0_g1	TRINITY_DN23527_c0_g1	TRINITY_DN18428_c5_g2
OG0003458	NA	NA	NA	NA	NA	NA	NA	DW	NA	8	1	0	1	1	OG0003458	TRINITY_DN1796_c0_g1	TRINITY_DN17348_c0_g2	TRINITY_DN40728_c0_g1	TRINITY_DN23370_c8_g1	TRINITY_DN21643_c4_g1	TRINITY_DN19785_c3_g1	TRINITY_DN18856_c3_g1		TRINITY_DN20981_c6_g2
OG0003460	NA	NA	DW	NA	NA	NA	NA	NA	NA	8	1	0	1	1	OG0003460	TRINITY_DN1798_c1_g1	TRINITY_DN18182_c2_g9	TRINITY_DN46481_c3_g1	TRINITY_DN24673_c6_g1	TRINITY_DN18059_c3_g2	TRINITY_DN14530_c7_g4	TRINITY_DN21025_c3_g3	TRINITY_DN503_c2_g10	TRINITY_DN18912_c4_g1
OG0003464	NA	NA	NA	NA	NA	NA	NA	DW	NA	8	1	0	1	1	OG0003464	TRINITY_DN1802_c4_g1	TRINITY_DN18392_c4_g3	TRINITY_DN48605_c2_g1	TRINITY_DN24170_c11_g1	TRINITY_DN17468_c0_g1	TRINITY_DN20654_c3_g1	TRINITY_DN21086_c8_g4		TRINITY_DN18509_c1_g3
OG0003482	NA	NA	NA	NA	NA	NA	NA	UP	NA	8	0	1	1	1	OG0003482	TRINITY_DN1822_c0_g1	TRINITY_DN19266_c1_g8	TRINITY_DN44194_c2_g2	TRINITY_DN23114_c10_g1	TRINITY_DN18056_c0_g1	TRINITY_DN20532_c6_g1	TRINITY_DN19016_c9_g1	TRINITY_DN3_c4_g2	TRINITY_DN23560_c2_g1
OG0003487	DW	NA	NA	NA	NA	NA	NA	NA	NA	8	1	0	1	1	OG0003487	TRINITY_DN1826_c0_g2	TRINITY_DN17351_c0_g1	TRINITY_DN47486_c0_g2	TRINITY_DN23444_c0_g1	TRINITY_DN21850_c3_g1	TRINITY_DN17398_c5_g1	TRINITY_DN18650_c0_g1	TRINITY_DN125_c0_g1	TRINITY_DN23236_c1_g1
OG0003491	NA	NA	DW	NA	NA	NA	NA	NA	NA	8	1	0	1	1	OG0003491	TRINITY_DN18371_c0_g1	TRINITY_DN19538_c2_g6	TRINITY_DN60512_c0_g1	TRINITY_DN32052_c0_g1	TRINITY_DN24588_c6_g4	TRINITY_DN19574_c8_g3	TRINITY_DN4532_c0_g1	TRINITY_DN679_c0_g4	TRINITY_DN18365_c2_g1
OG0003500	NA	NA	NA	NA	NA	NA	NA	UP	NA	8	0	1	1	1	OG0003500	TRINITY_DN1847_c4_g2	TRINITY_DN19251_c1_g3	TRINITY_DN48140_c0_g2	TRINITY_DN24163_c5_g2	TRINITY_DN23706_c3_g1	TRINITY_DN14961_c4_g1	TRINITY_DN19306_c5_g1	TRINITY_DN3808_c0_g2	TRINITY_DN21919_c5_g1
OG0003501	NA	NA	UP	NA	NA	NA	NA	NA	NA	8	0	1	1	1	OG0003501	TRINITY_DN18497_c0_g2	TRINITY_DN15165_c0_g1	TRINITY_DN25409_c0_g1	TRINITY_DN11254_c0_g1	TRINITY_DN16899_c0_g1	TRINITY_DN12044_c0_g1	TRINITY_DN19240_c4_g2	TRINITY_DN3597_c3_g1	TRINITY_DN17567_c0_g1
OG0003511	NA	NA	UP	NA	NA	NA	NA	NA	NA	8	0	1	1	1	OG0003511	TRINITY_DN1872_c3_g1	TRINITY_DN14471_c0_g1	TRINITY_DN39513_c0_g3	TRINITY_DN43259_c0_g1	TRINITY_DN17693_c0_g1	TRINITY_DN20619_c1_g2	TRINITY_DN18004_c6_g3	TRINITY_DN7477_c0_g1	TRINITY_DN22297_c0_g1
OG0003518	NA	NA	NA	NA	NA	NA	NA	UP	NA	8	0	1	1	1	OG0003518	TRINITY_DN1887_c0_g2	TRINITY_DN17060_c6_g1	TRINITY_DN45815_c3_g2	TRINITY_DN21884_c9_g1	TRINITY_DN18860_c12_g1	TRINITY_DN16620_c9_g1	TRINITY_DN20507_c7_g1	TRINITY_DN2731_c0_g2	TRINITY_DN19135_c13_g3
OG0003521	NA	NA	NA	NA	NA	NA	NA	DW	NA	8	1	0	1	1	OG0003521	TRINITY_DN188_c0_g2	TRINITY_DN18277_c8_g3	TRINITY_DN44377_c8_g1	TRINITY_DN24359_c7_g1	TRINITY_DN20675_c3_g1	TRINITY_DN21038_c10_g1	TRINITY_DN19710_c5_g4		TRINITY_DN22968_c1_g1
OG0003523	NA	NA	UP	NA	NA	NA	NA	NA	NA	8	0	1	1	1	OG0003523	TRINITY_DN18905_c2_g1	TRINITY_DN18516_c7_g3	TRINITY_DN47470_c6_g2	TRINITY_DN23650_c9_g1	TRINITY_DN17150_c0_g1	TRINITY_DN16937_c6_g2	TRINITY_DN18605_c7_g1	TRINITY_DN4577_c0_g1	TRINITY_DN20807_c3_g1
OG0003526	NA	NA	NA	NA	NA	NA	NA	DW	NA	8	1	0	1	1	OG0003526	TRINITY_DN18939_c2_g1	TRINITY_DN16864_c9_g1	TRINITY_DN80206_c0_g1	TRINITY_DN7848_c0_g1	TRINITY_DN23221_c0_g6	TRINITY_DN12642_c2_g3	TRINITY_DN19151_c6_g1	TRINITY_DN1765_c7_g1	TRINITY_DN22949_c7_g3
OG0003527	NA	NA	UP	NA	NA	NA	NA	NA	NA	8	0	1	1	1	OG0003527	TRINITY_DN1893_c13_g1	TRINITY_DN17423_c8_g3	TRINITY_DN44865_c0_g2	TRINITY_DN21519_c0_g2	TRINITY_DN19908_c4_g1	TRINITY_DN19269_c3_g1	TRINITY_DN17794_c7_g13	TRINITY_DN2258_c0_g1	TRINITY_DN23008_c1_g1
OG0003528	NA	NA	DW	NA	NA	NA	NA	NA	NA	8	1	0	1	1	OG0003528	TRINITY_DN1893_c1_g2	TRINITY_DN16254_c0_g2	TRINITY_DN43314_c2_g1		TRINITY_DN24220_c3_g2	TRINITY_DN21111_c5_g2	TRINITY_DN21165_c5_g1	TRINITY_DN1105_c2_g1	TRINITY_DN22776_c0_g1
OG0003532	UP	NA	NA	NA	NA	NA	NA	NA	NA	8	0	1	1	1	OG0003532	TRINITY_DN18_c6_g1	TRINITY_DN18150_c4_g1	TRINITY_DN45857_c2_g3	TRINITY_DN24241_c7_g1	TRINITY_DN21598_c4_g4	TRINITY_DN14918_c10_g1	TRINITY_DN17549_c11_g1	TRINITY_DN9544_c0_g1	TRINITY_DN20411_c8_g1
OG0003534	NA	NA	UP	NA	NA	NA	NA	NA	NA	8	0	1	1	1	OG0003534	TRINITY_DN1901_c0_g2	TRINITY_DN17700_c5_g1	TRINITY_DN41627_c0_g1	TRINITY_DN20874_c1_g1	TRINITY_DN25210_c7_g1	TRINITY_DN16929_c2_g2	TRINITY_DN19286_c8_g2	TRINITY_DN1728_c0_g1	TRINITY_DN19163_c3_g1
OG0003535	UP	NA	NA	NA	NA	NA	NA	NA	NA	8	0	1	1	1	OG0003535	TRINITY_DN19027_c1_g1	TRINITY_DN14861_c0_g1	TRINITY_DN39913_c0_g1	TRINITY_DN22939_c8_g3	TRINITY_DN24412_c5_g1	TRINITY_DN12056_c0_g1	TRINITY_DN10504_c0_g1	TRINITY_DN338_c0_g1	TRINITY_DN23850_c5_g1
OG0003549	NA	NA	NA	NA	NA	NA	NA	DW	NA	8	1	0	1	1	OG0003549	TRINITY_DN19254_c6_g1	TRINITY_DN16574_c6_g9	TRINITY_DN41057_c4_g2	TRINITY_DN22719_c5_g2	TRINITY_DN21047_c1_g1	TRINITY_DN12684_c4_g3	TRINITY_DN17965_c5_g5		TRINITY_DN15002_c0_g2
OG0003551	NA	NA	NA	NA	NA	NA	NA	DW	NA	8	1	0	1	1	OG0003551	TRINITY_DN1931_c10_g1	TRINITY_DN19143_c6_g1	TRINITY_DN43964_c1_g1	TRINITY_DN22643_c8_g11	TRINITY_DN21713_c3_g1	TRINITY_DN17002_c6_g1	TRINITY_DN18913_c2_g3		TRINITY_DN22127_c1_g4
OG0003560	NA	NA	UP	NA	NA	NA	NA	NA	NA	8	0	1	1	1	OG0003560	TRINITY_DN1948_c0_g1	TRINITY_DN15670_c0_g1	TRINITY_DN43507_c0_g1	TRINITY_DN21226_c0_g1	TRINITY_DN18038_c0_g1	TRINITY_DN14117_c7_g1	TRINITY_DN18818_c8_g1	TRINITY_DN6708_c0_g2	TRINITY_DN19560_c2_g1
OG0003588	NA	NA	NA	NA	NA	NA	NA	DW	NA	8	1	0	1	1	OG0003588	TRINITY_DN1982_c0_g2	TRINITY_DN16890_c6_g6	TRINITY_DN44874_c0_g1	TRINITY_DN23343_c3_g2	TRINITY_DN22503_c4_g1	TRINITY_DN14759_c6_g1	TRINITY_DN17051_c0_g1		TRINITY_DN60428_c0_g1
OG0003589	NA	NA	NA	NA	NA	NA	NA	DW	NA	8	1	0	1	1	OG0003589	TRINITY_DN1986_c0_g2	TRINITY_DN15325_c0_g1	TRINITY_DN41379_c0_g1	TRINITY_DN20433_c0_g1	TRINITY_DN23304_c3_g1		TRINITY_DN15082_c0_g1		TRINITY_DN23401_c0_g2
OG0003596	NA	NA	UP	NA	NA	NA	NA	NA	NA	8	0	1	1	1	OG0003596	TRINITY_DN1993_c0_g1	TRINITY_DN17941_c0_g1	TRINITY_DN44527_c1_g3	TRINITY_DN22649_c6_g1	TRINITY_DN21743_c3_g1	TRINITY_DN15713_c2_g1	TRINITY_DN19099_c2_g2	TRINITY_DN4253_c0_g1	TRINITY_DN22969_c0_g1
OG0003598	NA	NA	UP	NA	NA	NA	NA	NA	NA	8	0	1	1	1	OG0003598	TRINITY_DN1995_c0_g3	TRINITY_DN17443_c0_g1	TRINITY_DN47433_c1_g1	TRINITY_DN23530_c0_g1	TRINITY_DN25100_c3_g1	TRINITY_DN17935_c1_g1	TRINITY_DN20995_c3_g1	TRINITY_DN3022_c0_g3	TRINITY_DN23656_c3_g1
OG0003640	NA	NA	DW	NA	NA	NA	NA	NA	NA	8	1	0	1	1	OG0003640	TRINITY_DN2069_c0_g1	TRINITY_DN18441_c5_g1	TRINITY_DN40669_c0_g1	TRINITY_DN20840_c0_g1	TRINITY_DN18066_c0_g1	TRINITY_DN13597_c4_g4	TRINITY_DN17702_c0_g2	TRINITY_DN7868_c0_g1	TRINITY_DN20353_c6_g1
OG0003645	NA	NA	NA	NA	NA	NA	NA	DW	NA	8	1	0	1	1	OG0003645	TRINITY_DN2092_c0_g3	TRINITY_DN16283_c6_g2	TRINITY_DN46461_c2_g4	TRINITY_DN23446_c10_g2	TRINITY_DN19944_c4_g1	TRINITY_DN20460_c4_g1	TRINITY_DN19236_c6_g1		TRINITY_DN19577_c5_g1
OG0003651	NA	NA	NA	NA	NA	NA	NA	DW	NA	8	1	0	1	1	OG0003651	TRINITY_DN20_c19_g1	TRINITY_DN19753_c10_g1	TRINITY_DN46878_c5_g1	TRINITY_DN23299_c13_g1	TRINITY_DN20818_c5_g1	TRINITY_DN19939_c3_g1	TRINITY_DN20504_c3_g2	TRINITY_DN1891_c1_g3	TRINITY_DN19842_c6_g2
OG0003655	UP	NA	NA	NA	NA	NA	NA	NA	NA	8	0	1	1	1	OG0003655	TRINITY_DN21004_c0_g1	TRINITY_DN19369_c3_g2	TRINITY_DN44192_c0_g1	TRINITY_DN14811_c0_g1	TRINITY_DN17020_c0_g1	TRINITY_DN11731_c0_g1	TRINITY_DN15189_c0_g1	TRINITY_DN13236_c0_g2	TRINITY_DN19280_c2_g1
OG0003675	NA	NA	NA	NA	NA	NA	NA	NA	UP	8	0	1	1	1	OG0003675	TRINITY_DN213_c15_g2	TRINITY_DN16675_c6_g7	TRINITY_DN46576_c3_g1	TRINITY_DN22468_c4_g1	TRINITY_DN21888_c4_g2	TRINITY_DN20697_c4_g1	TRINITY_DN18075_c3_g1	TRINITY_DN935_c0_g1	TRINITY_DN18993_c4_g1
OG0003676	NA	NA	NA	NA	NA	NA	NA	DW	NA	8	1	0	1	1	OG0003676	TRINITY_DN213_c28_g1	TRINITY_DN18353_c3_g4	TRINITY_DN43181_c4_g1	TRINITY_DN21577_c8_g8	TRINITY_DN23952_c6_g1	TRINITY_DN18597_c5_g9	TRINITY_DN20780_c8_g1
OG0003681	DW	NA	NA	NA	NA	NA	NA	NA	NA	8	1	0	1	1	OG0003681	TRINITY_DN2146_c1_g2		TRINITY_DN45335_c0_g1	TRINITY_DN21736_c7_g3	TRINITY_DN18273_c8_g1	TRINITY_DN17261_c2_g1	TRINITY_DN19441_c6_g2	TRINITY_DN3388_c1_g1	TRINITY_DN21196_c9_g2
OG0003689	NA	NA	UP	NA	NA	NA	NA	NA	NA	8	0	1	1	1	OG0003689	TRINITY_DN2163_c0_g2	TRINITY_DN11967_c0_g1	TRINITY_DN42573_c2_g1	TRINITY_DN21722_c4_g3	TRINITY_DN18790_c3_g6	TRINITY_DN19612_c1_g1	TRINITY_DN21105_c5_g1	TRINITY_DN620_c0_g1
OG0003712	NA	NA	NA	NA	NA	NA	NA	UP	NA	8	0	1	1	1	OG0003712	TRINITY_DN2195_c0_g2	TRINITY_DN18729_c6_g4	TRINITY_DN46973_c0_g1	TRINITY_DN23448_c11_g1	TRINITY_DN24356_c12_g1	TRINITY_DN16539_c7_g1	TRINITY_DN17566_c7_g1	TRINITY_DN4892_c0_g3	TRINITY_DN22489_c6_g1
OG0003714	NA	NA	NA	NA	NA	NA	NA	DW	NA	8	1	0	1	1	OG0003714	TRINITY_DN219_c0_g2	TRINITY_DN18610_c6_g1	TRINITY_DN48094_c7_g1	TRINITY_DN21819_c8_g1	TRINITY_DN22344_c2_g4	TRINITY_DN17891_c7_g3	TRINITY_DN19900_c5_g3		TRINITY_DN20360_c6_g1
OG0003717	NA	NA	NA	NA	NA	NA	NA	UP	NA	8	0	1	1	1	OG0003717	TRINITY_DN21_c1_g3	TRINITY_DN17760_c2_g1	TRINITY_DN45014_c0_g1		TRINITY_DN24637_c4_g1	TRINITY_DN20798_c4_g1	TRINITY_DN18277_c3_g2	TRINITY_DN6582_c2_g1	TRINITY_DN19263_c7_g1
OG0003719	NA	DW	NA	NA	NA	NA	NA	NA	NA	8	1	0	1	1	OG0003719	TRINITY_DN22025_c0_g2	TRINITY_DN16997_c4_g2	TRINITY_DN38960_c0_g1	TRINITY_DN21204_c0_g1	TRINITY_DN24743_c4_g2	TRINITY_DN17254_c9_g1	TRINITY_DN17232_c0_g1	TRINITY_DN4450_c0_g1	TRINITY_DN23035_c8_g2
OG0003731	NA	NA	NA	NA	NA	NA	NA	UP	NA	8	0	1	1	1	OG0003731	TRINITY_DN22204_c0_g2		TRINITY_DN47599_c8_g1		TRINITY_DN20803_c0_g3	TRINITY_DN13938_c5_g1	TRINITY_DN21213_c12_g2	TRINITY_DN16414_c0_g1	TRINITY_DN20112_c2_g1
OG0003737	NA	NA	UP	NA	NA	NA	NA	NA	NA	8	0	1	1	1	OG0003737	TRINITY_DN2230_c14_g1		TRINITY_DN70686_c0_g1	TRINITY_DN11034_c0_g1	TRINITY_DN2030_c0_g2		TRINITY_DN22416_c0_g1	TRINITY_DN23662_c0_g1	TRINITY_DN8486_c0_g1
OG0003755	NA	NA	NA	NA	NA	NA	NA	UP	NA	8	0	1	1	1	OG0003755	TRINITY_DN225_c6_g3	TRINITY_DN17917_c8_g1	TRINITY_DN48419_c1_g1	TRINITY_DN21684_c5_g1	TRINITY_DN18424_c7_g2	TRINITY_DN19306_c6_g3	TRINITY_DN21300_c15_g1	TRINITY_DN1052_c0_g1	TRINITY_DN20341_c8_g1
OG0003756	NA	NA	NA	NA	UP	NA	NA	NA	NA	8	0	1	1	1	OG0003756	TRINITY_DN2264_c0_g1	TRINITY_DN16683_c5_g1	TRINITY_DN46117_c3_g1	TRINITY_DN22495_c12_g1	TRINITY_DN20336_c2_g1	TRINITY_DN18516_c4_g1	TRINITY_DN20059_c2_g2	TRINITY_DN2740_c0_g2	TRINITY_DN21488_c2_g1
OG0003778	NA	NA	DW	NA	NA	NA	NA	NA	NA	8	1	0	1	1	OG0003778	TRINITY_DN2303_c2_g1	TRINITY_DN18726_c2_g4	TRINITY_DN45601_c8_g3	TRINITY_DN22439_c11_g1	TRINITY_DN22883_c5_g1	TRINITY_DN13480_c9_g1	TRINITY_DN18047_c3_g4	TRINITY_DN4314_c3_g3	TRINITY_DN18499_c5_g3
OG0003779	NA	NA	DW	NA	NA	NA	NA	NA	NA	8	1	0	1	1	OG0003779	TRINITY_DN2304_c0_g1	TRINITY_DN17959_c5_g4	TRINITY_DN45692_c0_g1	TRINITY_DN21428_c0_g1	TRINITY_DN20256_c9_g1	TRINITY_DN12215_c0_g1	TRINITY_DN17607_c0_g1	TRINITY_DN2560_c0_g2	TRINITY_DN22493_c3_g1
OG0003780	NA	NA	NA	NA	NA	NA	NA	DW	NA	8	1	0	1	1	OG0003780	TRINITY_DN2313_c0_g1	TRINITY_DN19325_c2_g1	TRINITY_DN46831_c3_g1	TRINITY_DN23531_c6_g1	TRINITY_DN22167_c7_g1	TRINITY_DN20215_c0_g1	TRINITY_DN19200_c0_g2		TRINITY_DN22391_c7_g2
OG0003785	NA	NA	UP	NA	NA	NA	NA	NA	NA	8	0	1	1	1	OG0003785	TRINITY_DN2322_c0_g1	TRINITY_DN16889_c6_g4	TRINITY_DN47844_c1_g1	TRINITY_DN23348_c2_g2	TRINITY_DN20915_c2_g1	TRINITY_DN19635_c0_g1	TRINITY_DN17530_c0_g1	TRINITY_DN733_c1_g4	TRINITY_DN23760_c3_g2
OG0003802	NA	NA	NA	NA	NA	NA	NA	DW	NA	8	1	0	1	1	OG0003802	TRINITY_DN234_c2_g4	TRINITY_DN18113_c6_g1	TRINITY_DN45937_c4_g1	TRINITY_DN24319_c6_g3	TRINITY_DN24112_c4_g1	TRINITY_DN21304_c7_g1	TRINITY_DN20858_c4_g1		TRINITY_DN20149_c7_g1
OG0003803	NA	NA	DW	NA	NA	NA	NA	NA	NA	8	1	0	1	1	OG0003803	TRINITY_DN2350_c0_g2	TRINITY_DN18979_c2_g5	TRINITY_DN49042_c7_g3	TRINITY_DN24950_c4_g1	TRINITY_DN24730_c8_g2	TRINITY_DN17016_c8_g2	TRINITY_DN19316_c2_g1	TRINITY_DN2054_c1_g1	TRINITY_DN22869_c8_g3
OG0003805	NA	NA	UP	NA	NA	NA	NA	NA	NA	8	0	1	1	1	OG0003805	TRINITY_DN2355_c0_g1	TRINITY_DN15756_c0_g1	TRINITY_DN42939_c1_g1	TRINITY_DN22644_c9_g1	TRINITY_DN22781_c3_g1	TRINITY_DN18438_c9_g1	TRINITY_DN21005_c5_g1	TRINITY_DN6251_c0_g3	TRINITY_DN23415_c4_g1
OG0003814	NA	NA	UP	NA	NA	NA	NA	NA	NA	8	0	1	1	1	OG0003814	TRINITY_DN23660_c1_g1	TRINITY_DN19208_c3_g3	TRINITY_DN46459_c4_g1	TRINITY_DN22908_c4_g7	TRINITY_DN24284_c7_g2	TRINITY_DN17320_c7_g2	TRINITY_DN20137_c4_g1	TRINITY_DN12291_c0_g2	TRINITY_DN18869_c9_g1
OG0003815	NA	NA	UP	NA	NA	NA	NA	NA	NA	8	0	1	1	1	OG0003815	TRINITY_DN23675_c0_g1	TRINITY_DN16793_c5_g5	TRINITY_DN42340_c6_g5	TRINITY_DN22025_c13_g1	TRINITY_DN20936_c8_g1	TRINITY_DN12373_c9_g3	TRINITY_DN18520_c6_g1	TRINITY_DN11911_c0_g1	TRINITY_DN20787_c10_g2
OG0003820	NA	NA	NA	NA	NA	NA	NA	DW	NA	8	1	0	1	1	OG0003820	TRINITY_DN236_c9_g1	TRINITY_DN16404_c1_g1	TRINITY_DN42371_c5_g2	TRINITY_DN24026_c3_g2	TRINITY_DN21424_c3_g5	TRINITY_DN12870_c6_g1	TRINITY_DN20293_c2_g1		TRINITY_DN20102_c11_g2
OG0003832	NA	NA	NA	NA	NA	NA	NA	UP	NA	8	0	1	1	1	OG0003832	TRINITY_DN238_c2_g2	TRINITY_DN17279_c7_g1	TRINITY_DN48449_c3_g1	TRINITY_DN24427_c7_g1	TRINITY_DN24669_c6_g1	TRINITY_DN19665_c1_g2	TRINITY_DN19740_c9_g1	TRINITY_DN3028_c0_g1	TRINITY_DN19944_c3_g1
OG0003835	NA	NA	NA	NA	NA	NA	NA	NA	UP	8	0	1	1	1	OG0003835	TRINITY_DN2390_c1_g1	TRINITY_DN15437_c0_g1	TRINITY_DN40682_c0_g1	TRINITY_DN16160_c0_g1	TRINITY_DN17336_c0_g1		TRINITY_DN16159_c0_g2	TRINITY_DN59088_c0_g1	TRINITY_DN22687_c6_g1
OG0003837	NA	NA	UP	NA	NA	NA	NA	NA	NA	8	0	1	1	1	OG0003837	TRINITY_DN23963_c0_g1	TRINITY_DN17205_c5_g1	TRINITY_DN38438_c0_g1	TRINITY_DN23621_c10_g1	TRINITY_DN18336_c5_g6	TRINITY_DN16361_c3_g4	TRINITY_DN3278_c0_g1	TRINITY_DN1259_c1_g2	TRINITY_DN21716_c1_g2
OG0003841	UP	NA	NA	NA	NA	NA	NA	NA	NA	8	0	1	1	1	OG0003841	TRINITY_DN239_c13_g1	TRINITY_DN18013_c7_g1	TRINITY_DN43931_c2_g1	TRINITY_DN24158_c3_g5	TRINITY_DN17978_c0_g3	TRINITY_DN20855_c3_g1	TRINITY_DN20766_c4_g1	TRINITY_DN9453_c0_g1	TRINITY_DN18943_c8_g3
OG0003844	DW	NA	NA	NA	NA	NA	NA	NA	NA	8	1	0	1	1	OG0003844	TRINITY_DN2401_c4_g1	TRINITY_DN19410_c4_g1	TRINITY_DN44112_c7_g2	TRINITY_DN24801_c3_g2	TRINITY_DN19585_c6_g5	TRINITY_DN21225_c6_g1	TRINITY_DN18365_c9_g4	TRINITY_DN2974_c2_g2	TRINITY_DN19992_c9_g2
OG0003851	NA	NA	UP	NA	NA	NA	NA	NA	NA	8	0	1	1	1	OG0003851	TRINITY_DN2423_c0_g2	TRINITY_DN15294_c0_g2	TRINITY_DN43698_c3_g1	TRINITY_DN23312_c4_g4	TRINITY_DN24905_c1_g1	TRINITY_DN18080_c5_g1	TRINITY_DN16904_c0_g1	TRINITY_DN55_c0_g1	TRINITY_DN21682_c9_g2
OG0003854	NA	NA	UP	NA	NA	NA	NA	NA	NA	8	0	1	1	1	OG0003854	TRINITY_DN2432_c0_g2	TRINITY_DN17127_c5_g1	TRINITY_DN46180_c3_g1	TRINITY_DN24225_c2_g1	TRINITY_DN22852_c2_g1	TRINITY_DN20671_c3_g1	TRINITY_DN19172_c1_g2	TRINITY_DN21959_c0_g1	TRINITY_DN21447_c1_g1
OG0003861	NA	NA	NA	NA	NA	NA	NA	DW	NA	8	1	0	1	1	OG0003861	TRINITY_DN24420_c0_g1	TRINITY_DN16848_c7_g9	TRINITY_DN48273_c0_g2	TRINITY_DN20258_c0_g2	TRINITY_DN17299_c0_g1	TRINITY_DN20181_c7_g2	TRINITY_DN14843_c0_g1		TRINITY_DN22799_c5_g1
OG0003874	NA	NA	DW	NA	NA	NA	NA	NA	NA	8	1	0	1	1	OG0003874	TRINITY_DN24627_c10_g1	TRINITY_DN14497_c0_g1	TRINITY_DN41739_c0_g1	TRINITY_DN17919_c0_g2	TRINITY_DN17595_c0_g1	TRINITY_DN19107_c4_g1	TRINITY_DN19058_c9_g2	TRINITY_DN7698_c0_g1	TRINITY_DN19760_c10_g1
OG0003876	NA	NA	NA	NA	NA	NA	NA	UP	NA	8	0	1	1	1	OG0003876	TRINITY_DN246_c2_g1	TRINITY_DN17067_c5_g3	TRINITY_DN42595_c9_g1	TRINITY_DN21717_c14_g1	TRINITY_DN20579_c8_g1	TRINITY_DN17205_c5_g2	TRINITY_DN19501_c2_g1	TRINITY_DN3625_c0_g2	TRINITY_DN21217_c3_g1
OG0003879	NA	NA	NA	NA	NA	NA	NA	NA	UP	8	0	1	1	1	OG0003879	TRINITY_DN2487_c1_g1	TRINITY_DN18390_c1_g5	TRINITY_DN46864_c1_g1	TRINITY_DN24942_c5_g1	TRINITY_DN19150_c3_g1	TRINITY_DN14637_c0_g2	TRINITY_DN18663_c0_g2	TRINITY_DN2980_c1_g1	TRINITY_DN19819_c0_g1
OG0003880	NA	NA	NA	NA	NA	NA	NA	NA	DW	8	1	0	1	1	OG0003880	TRINITY_DN24884_c0_g2	TRINITY_DN14541_c0_g1	TRINITY_DN41083_c1_g1	TRINITY_DN20221_c0_g1	TRINITY_DN20980_c8_g1	TRINITY_DN12137_c0_g1	TRINITY_DN11351_c0_g1	TRINITY_DN31_c1_g1	TRINITY_DN22409_c7_g1
OG0003892	NA	NA	NA	NA	NA	NA	NA	NA	UP	8	0	1	1	1	OG0003892	TRINITY_DN2507_c0_g2	TRINITY_DN17648_c6_g2	TRINITY_DN43690_c5_g2	TRINITY_DN24227_c6_g1	TRINITY_DN24660_c2_g1	TRINITY_DN16966_c1_g3	TRINITY_DN17180_c0_g2	TRINITY_DN4424_c1_g1	TRINITY_DN22215_c9_g4
OG0003904	NA	NA	NA	NA	NA	NA	NA	NA	DW	8	1	0	1	1	OG0003904	TRINITY_DN25332_c1_g2	TRINITY_DN14984_c0_g1	TRINITY_DN44851_c5_g2	TRINITY_DN24153_c7_g3	TRINITY_DN21405_c7_g1	TRINITY_DN19182_c3_g1	TRINITY_DN18441_c3_g1	TRINITY_DN791_c2_g2	TRINITY_DN19296_c5_g3
OG0003924	NA	NA	NA	NA	NA	NA	NA	UP	NA	8	0	1	1	1	OG0003924	TRINITY_DN2596_c0_g2	TRINITY_DN17982_c5_g1	TRINITY_DN48715_c0_g1	TRINITY_DN23509_c9_g1	TRINITY_DN23221_c0_g7	TRINITY_DN20295_c2_g2	TRINITY_DN19520_c5_g6	TRINITY_DN1941_c0_g5	TRINITY_DN23257_c1_g1
OG0003929	NA	NA	NA	NA	NA	NA	NA	DW	NA	8	1	0	1	1	OG0003929	TRINITY_DN259_c0_g4	TRINITY_DN17349_c6_g4	TRINITY_DN44623_c9_g1	TRINITY_DN23475_c1_g1	TRINITY_DN24085_c4_g1	TRINITY_DN13066_c3_g6	TRINITY_DN20203_c8_g1		TRINITY_DN19078_c2_g3
OG0003933	NA	NA	NA	NA	NA	NA	NA	UP	NA	8	0	1	1	1	OG0003933	TRINITY_DN2600_c0_g2	TRINITY_DN18937_c2_g1	TRINITY_DN48505_c1_g2	TRINITY_DN23794_c5_g1	TRINITY_DN22949_c2_g1	TRINITY_DN19739_c9_g1	TRINITY_DN20421_c4_g2	TRINITY_DN1788_c1_g2	TRINITY_DN21097_c10_g1
OG0003949	NA	NA	UP	NA	NA	NA	NA	NA	NA	8	0	1	1	1	OG0003949	TRINITY_DN26302_c0_g1	TRINITY_DN15047_c0_g1	TRINITY_DN45414_c1_g2		TRINITY_DN18388_c4_g1	TRINITY_DN16547_c7_g1	TRINITY_DN18837_c3_g2	TRINITY_DN1013_c2_g1	TRINITY_DN19880_c4_g1
OG0003951	NA	NA	NA	NA	NA	NA	NA	NA	UP	8	0	1	1	1	OG0003951	TRINITY_DN2631_c4_g1	TRINITY_DN17501_c6_g3	TRINITY_DN46046_c6_g1	TRINITY_DN22450_c3_g1	TRINITY_DN21550_c8_g1	TRINITY_DN14743_c2_g1	TRINITY_DN19329_c6_g3	TRINITY_DN4112_c1_g1	TRINITY_DN23881_c7_g5
OG0003954	NA	NA	UP	NA	NA	NA	NA	NA	NA	8	0	1	1	1	OG0003954	TRINITY_DN26434_c0_g1	TRINITY_DN15792_c0_g1	TRINITY_DN36347_c0_g1	TRINITY_DN21739_c6_g1	TRINITY_DN23366_c9_g4	TRINITY_DN12379_c0_g1	TRINITY_DN18026_c11_g1	TRINITY_DN3543_c0_g1	TRINITY_DN23144_c3_g2
OG0003968	NA	NA	UP	NA	NA	NA	NA	NA	NA	8	0	1	1	1	OG0003968	TRINITY_DN267_c5_g2	TRINITY_DN17493_c1_g2	TRINITY_DN48360_c11_g2	TRINITY_DN22851_c3_g1	TRINITY_DN18415_c0_g1	TRINITY_DN18356_c2_g1	TRINITY_DN18201_c1_g3	TRINITY_DN2325_c0_g1	TRINITY_DN21719_c4_g1
OG0003995	NA	NA	NA	UP	NA	NA	NA	NA	NA	8	0	1	1	1	OG0003995	TRINITY_DN27371_c1_g1	TRINITY_DN43069_c0_g1		TRINITY_DN20922_c0_g2		TRINITY_DN14375_c2_g2	TRINITY_DN14119_c0_g2	TRINITY_DN23869_c0_g1	TRINITY_DN22125_c5_g2
OG0003998	NA	NA	NA	NA	NA	NA	NA	UP	NA	8	0	1	1	1	OG0003998	TRINITY_DN2746_c0_g2	TRINITY_DN17436_c3_g2	TRINITY_DN46474_c0_g1	TRINITY_DN22668_c4_g1	TRINITY_DN20042_c11_g1	TRINITY_DN13078_c0_g1	TRINITY_DN19665_c6_g2	TRINITY_DN3991_c2_g1	TRINITY_DN19101_c6_g1
OG0004009	NA	NA	NA	NA	NA	NA	NA	DW	NA	8	1	0	1	1	OG0004009	TRINITY_DN2763_c0_g2	TRINITY_DN18179_c5_g1	TRINITY_DN47342_c10_g1	TRINITY_DN24613_c6_g2	TRINITY_DN23574_c3_g1	TRINITY_DN13965_c6_g4	TRINITY_DN21102_c6_g1		TRINITY_DN23138_c4_g2
OG0004012	DW	NA	NA	NA	NA	NA	NA	NA	NA	8	1	0	1	1	OG0004012	TRINITY_DN2769_c0_g2	TRINITY_DN17023_c9_g2	TRINITY_DN44143_c0_g1	TRINITY_DN21335_c1_g1	TRINITY_DN17726_c0_g1	TRINITY_DN16388_c6_g1	TRINITY_DN21375_c3_g1	TRINITY_DN198_c3_g1	TRINITY_DN23044_c1_g3
OG0004018	NA	NA	DW	NA	NA	NA	NA	NA	NA	8	1	0	1	1	OG0004018	TRINITY_DN27792_c0_g1	TRINITY_DN16292_c6_g1	TRINITY_DN46819_c2_g1	TRINITY_DN24335_c2_g1	TRINITY_DN19134_c5_g1	TRINITY_DN16343_c3_g2	TRINITY_DN20067_c7_g2	TRINITY_DN782_c6_g1	TRINITY_DN23768_c3_g2
OG0004021	NA	NA	NA	NA	NA	NA	NA	UP	NA	8	0	1	1	1	OG0004021	TRINITY_DN27909_c0_g1	TRINITY_DN17196_c3_g1	TRINITY_DN42333_c3_g3	TRINITY_DN21020_c0_g1	TRINITY_DN18526_c9_g1	TRINITY_DN14449_c5_g1	TRINITY_DN19059_c4_g2	TRINITY_DN10147_c0_g1	TRINITY_DN19050_c6_g1
OG0004024	NA	NA	NA	NA	NA	NA	NA	DW	NA	8	1	0	1	1	OG0004024	TRINITY_DN27_c0_g1	TRINITY_DN18367_c2_g3	TRINITY_DN47270_c0_g1	TRINITY_DN22767_c6_g3	TRINITY_DN21476_c9_g1	TRINITY_DN19042_c4_g2	TRINITY_DN18339_c0_g6		TRINITY_DN22942_c2_g1
OG0004033	NA	NA	NA	NA	NA	NA	NA	UP	NA	8	0	1	1	1	OG0004033	TRINITY_DN2819_c5_g1	TRINITY_DN16556_c3_g2	TRINITY_DN41676_c0_g1	TRINITY_DN24738_c5_g3	TRINITY_DN22173_c2_g1	TRINITY_DN20650_c5_g4	TRINITY_DN17639_c8_g1	TRINITY_DN29469_c0_g2	TRINITY_DN18282_c4_g1
OG0004041	NA	NA	NA	NA	NA	NA	NA	UP	NA	8	0	1	1	1	OG0004041	TRINITY_DN2833_c0_g1	TRINITY_DN16063_c0_g1	TRINITY_DN43210_c1_g2	TRINITY_DN24454_c10_g2		TRINITY_DN18759_c7_g1	TRINITY_DN17584_c6_g9	TRINITY_DN1317_c2_g2	TRINITY_DN23867_c7_g1
OG0004049	NA	NA	NA	NA	NA	NA	NA	DW	NA	8	1	0	1	1	OG0004049	TRINITY_DN283_c30_g1	TRINITY_DN68_c0_g1	TRINITY_DN380_c0_g1	TRINITY_DN17372_c0_g1	TRINITY_DN23012_c6_g1	TRINITY_DN18815_c5_g1	TRINITY_DN44008_c0_g1		TRINITY_DN21727_c4_g2
OG0004058	NA	NA	NA	NA	NA	NA	NA	UP	NA	8	0	1	1	1	OG0004058	TRINITY_DN285_c2_g2	TRINITY_DN16819_c3_g1	TRINITY_DN47356_c0_g1	TRINITY_DN23797_c2_g1	TRINITY_DN23699_c8_g1	TRINITY_DN18700_c0_g3	TRINITY_DN20376_c6_g1	TRINITY_DN1759_c2_g4	TRINITY_DN22238_c7_g1
OG0004072	NA	NA	NA	NA	NA	NA	NA	DW	NA	8	1	0	1	1	OG0004072	TRINITY_DN28_c0_g1	TRINITY_DN17395_c6_g5	TRINITY_DN46720_c1_g2	TRINITY_DN23054_c0_g1	TRINITY_DN19708_c7_g1	TRINITY_DN19911_c3_g1	TRINITY_DN19145_c5_g2		TRINITY_DN20064_c1_g1
OG0004078	NA	NA	UP	NA	NA	NA	NA	NA	NA	8	0	1	1	1	OG0004078	TRINITY_DN290_c4_g2	TRINITY_DN19334_c9_g1	TRINITY_DN46867_c4_g4			TRINITY_DN18450_c8_g1	TRINITY_DN21095_c5_g2	TRINITY_DN6_c0_g1	TRINITY_DN22440_c5_g2
OG0004095	NA	NA	NA	NA	UP	NA	NA	NA	NA	8	0	1	1	1	OG0004095	TRINITY_DN29365_c0_g1	TRINITY_DN17130_c7_g1	TRINITY_DN40235_c0_g1	TRINITY_DN22828_c6_g1	TRINITY_DN23591_c10_g1	TRINITY_DN14811_c6_g1	TRINITY_DN19974_c7_g3	TRINITY_DN17410_c0_g2	TRINITY_DN18906_c2_g3
OG0004096	UP	NA	NA	NA	NA	NA	NA	NA	NA	8	0	1	1	1	OG0004096	TRINITY_DN2936_c3_g2	TRINITY_DN18494_c1_g1	TRINITY_DN43655_c0_g1	TRINITY_DN23744_c6_g3	TRINITY_DN24642_c5_g2	TRINITY_DN19174_c7_g1	TRINITY_DN17278_c0_g1	TRINITY_DN618_c0_g1	TRINITY_DN20749_c7_g2
OG0004099	NA	NA	NA	NA	NA	NA	NA	DW	NA	8	1	0	1	1	OG0004099	TRINITY_DN2948_c0_g1	TRINITY_DN16582_c1_g1	TRINITY_DN43903_c7_g1	TRINITY_DN23415_c1_g5	TRINITY_DN20591_c3_g1	TRINITY_DN12473_c7_g1	TRINITY_DN19555_c2_g1		TRINITY_DN17445_c0_g1
OG0004100	NA	NA	DW	NA	NA	NA	NA	NA	NA	8	1	0	1	1	OG0004100	TRINITY_DN2948_c4_g2	TRINITY_DN19704_c2_g2	TRINITY_DN44484_c0_g1	TRINITY_DN22527_c9_g1	TRINITY_DN21653_c0_g1	TRINITY_DN21434_c9_g1	TRINITY_DN19067_c5_g1	TRINITY_DN3413_c2_g1	TRINITY_DN20167_c6_g3
OG0004110	NA	NA	NA	NA	NA	NA	NA	DW	NA	8	1	0	1	1	OG0004110	TRINITY_DN29786_c1_g1	TRINITY_DN19593_c8_g2	TRINITY_DN42461_c2_g1		TRINITY_DN18482_c5_g1	TRINITY_DN13998_c7_g1	TRINITY_DN17833_c9_g3		TRINITY_DN19544_c5_g1
OG0004119	NA	NA	UP	NA	NA	NA	NA	NA	NA	8	0	1	1	1	OG0004119	TRINITY_DN298_c5_g2	TRINITY_DN19607_c5_g1	TRINITY_DN40262_c0_g1	TRINITY_DN24354_c5_g1	TRINITY_DN20866_c11_g1	TRINITY_DN19385_c5_g1	TRINITY_DN18115_c9_g1	TRINITY_DN35214_c0_g1	TRINITY_DN20713_c1_g1
OG0004120	NA	NA	NA	NA	NA	NA	NA	UP	NA	8	0	1	1	1	OG0004120	TRINITY_DN2991_c0_g2	TRINITY_DN19482_c1_g1	TRINITY_DN46768_c2_g1	TRINITY_DN21624_c6_g4	TRINITY_DN16804_c0_g1	TRINITY_DN12998_c2_g1	TRINITY_DN16200_c0_g1	TRINITY_DN3657_c0_g1	TRINITY_DN18035_c0_g1
OG0004125	DW	NA	NA	NA	NA	NA	NA	NA	NA	8	1	0	1	1	OG0004125	TRINITY_DN3000_c0_g2	TRINITY_DN19753_c7_g1	TRINITY_DN43023_c0_g1	TRINITY_DN23359_c5_g3	TRINITY_DN17612_c0_g1	TRINITY_DN20026_c5_g1	TRINITY_DN18040_c4_g1	TRINITY_DN390_c1_g3	TRINITY_DN23807_c4_g2
OG0004129	NA	NA	NA	NA	NA	NA	NA	UP	NA	8	0	1	1	1	OG0004129	TRINITY_DN3007_c1_g1	TRINITY_DN16735_c7_g3	TRINITY_DN47827_c6_g1	TRINITY_DN21812_c11_g1	TRINITY_DN25043_c5_g1	TRINITY_DN13956_c1_g1	TRINITY_DN19485_c4_g1	TRINITY_DN2367_c6_g1	TRINITY_DN19272_c7_g1
OG0004138	NA	NA	NA	NA	NA	NA	NA	UP	NA	8	0	1	1	1	OG0004138	TRINITY_DN3038_c7_g2	TRINITY_DN18623_c6_g1	TRINITY_DN41851_c1_g1	TRINITY_DN22911_c1_g1	TRINITY_DN19246_c3_g1	TRINITY_DN17811_c9_g6	TRINITY_DN17733_c10_g7	TRINITY_DN9709_c0_g2	TRINITY_DN21580_c4_g1
OG0004140	NA	DW	NA	NA	NA	NA	NA	NA	NA	8	1	0	1	1	OG0004140	TRINITY_DN3041_c0_g2	TRINITY_DN32774_c0_g1	TRINITY_DN30823_c0_g1	TRINITY_DN19617_c0_g1	TRINITY_DN20079_c5_g3			TRINITY_DN57781_c1_g1	TRINITY_DN16514_c0_g1
OG0004145	NA	NA	NA	DW	NA	NA	NA	NA	NA	8	1	0	1	1	OG0004145	TRINITY_DN3051_c0_g1	TRINITY_DN16629_c8_g2	TRINITY_DN42879_c0_g1	TRINITY_DN22125_c7_g1	TRINITY_DN15630_c0_g1	TRINITY_DN18702_c3_g1	TRINITY_DN20266_c1_g1	TRINITY_DN46_c0_g1	TRINITY_DN23588_c5_g1
OG0004146	NA	NA	NA	NA	NA	NA	NA	DW	NA	8	1	0	1	1	OG0004146	TRINITY_DN3054_c0_g2	TRINITY_DN18991_c7_g1	TRINITY_DN41954_c0_g1	TRINITY_DN21216_c0_g1	TRINITY_DN17911_c0_g1	TRINITY_DN14147_c1_g1	TRINITY_DN17689_c0_g1		TRINITY_DN20910_c3_g4
OG0004157	NA	NA	UP	NA	NA	NA	NA	NA	NA	8	0	1	1	1	OG0004157	TRINITY_DN30981_c1_g1	TRINITY_DN2721_c0_g2	TRINITY_DN8599_c0_g1	TRINITY_DN17346_c0_g1	TRINITY_DN20441_c3_g2	TRINITY_DN12865_c6_g2	TRINITY_DN10806_c0_g2	TRINITY_DN5760_c0_g3	TRINITY_DN21575_c1_g4
OG0004165	NA	NA	DW	NA	NA	NA	NA	NA	NA	8	1	0	1	1	OG0004165	TRINITY_DN3115_c1_g1	TRINITY_DN17392_c10_g1	TRINITY_DN46745_c1_g1	TRINITY_DN24485_c10_g2	TRINITY_DN24492_c6_g2	TRINITY_DN20236_c6_g1	TRINITY_DN19526_c4_g1	TRINITY_DN1129_c2_g3	TRINITY_DN23221_c2_g3
OG0004168	NA	NA	NA	NA	NA	NA	NA	NA	DW	8	1	0	1	1	OG0004168	TRINITY_DN3117_c0_g1	TRINITY_DN17612_c5_g2	TRINITY_DN47092_c8_g3	TRINITY_DN23364_c4_g1		TRINITY_DN13914_c8_g2	TRINITY_DN18886_c2_g4	TRINITY_DN1082_c4_g1	TRINITY_DN18741_c3_g2
OG0004169	NA	NA	DW	NA	NA	NA	NA	NA	NA	8	1	0	1	1	OG0004169	TRINITY_DN31187_c0_g1	TRINITY_DN17701_c2_g1	TRINITY_DN20195_c0_g1	TRINITY_DN20364_c0_g1	TRINITY_DN16621_c0_g1	TRINITY_DN17716_c0_g1	TRINITY_DN16660_c0_g1	TRINITY_DN2349_c0_g2
OG0004177	NA	NA	NA	NA	NA	NA	NA	NA	DW	8	1	0	1	1	OG0004177	TRINITY_DN31323_c0_g1	TRINITY_DN18901_c1_g2	TRINITY_DN92957_c0_g1	TRINITY_DN46494_c0_g1	TRINITY_DN47642_c0_g1	TRINITY_DN13570_c1_g1	TRINITY_DN19480_c5_g1	TRINITY_DN4292_c8_g1	TRINITY_DN22693_c8_g1
OG0004195	NA	NA	UP	NA	NA	NA	NA	NA	NA	8	0	1	1	1	OG0004195	TRINITY_DN31947_c0_g1	TRINITY_DN12167_c0_g1	TRINITY_DN31694_c0_g1	TRINITY_DN5736_c0_g1	TRINITY_DN22522_c4_g3	TRINITY_DN17807_c0_g1	TRINITY_DN43619_c0_g1	TRINITY_DN6064_c0_g2	TRINITY_DN19850_c0_g2
OG0004202	NA	NA	NA	NA	UP	NA	NA	NA	NA	8	0	1	1	1	OG0004202	TRINITY_DN31_c4_g1	TRINITY_DN19352_c2_g2	TRINITY_DN47460_c0_g1	TRINITY_DN22319_c9_g3	TRINITY_DN23749_c4_g2	TRINITY_DN17056_c5_g2	TRINITY_DN21273_c12_g1	TRINITY_DN1940_c0_g1	TRINITY_DN21985_c1_g2
OG0004212	NA	NA	NA	NA	NA	NA	NA	NA	DW	8	1	0	1	1	OG0004212	TRINITY_DN3220_c2_g1	TRINITY_DN16244_c1_g1	TRINITY_DN45152_c9_g1	TRINITY_DN23232_c7_g1	TRINITY_DN22075_c6_g1	TRINITY_DN17879_c8_g2	TRINITY_DN19882_c0_g5	TRINITY_DN128_c0_g6	TRINITY_DN19539_c4_g3
OG0004225	NA	NA	UP	NA	NA	NA	NA	NA	NA	8	0	1	1	1	OG0004225	TRINITY_DN3244_c0_g1	TRINITY_DN16335_c3_g3	TRINITY_DN46765_c3_g4	TRINITY_DN22584_c3_g6	TRINITY_DN24659_c4_g1	TRINITY_DN15172_c3_g1	TRINITY_DN18135_c5_g1	TRINITY_DN2139_c0_g1	TRINITY_DN19877_c6_g1
OG0004231	NA	NA	UP	NA	NA	NA	NA	NA	NA	8	0	1	1	1	OG0004231	TRINITY_DN3265_c0_g1	TRINITY_DN17973_c5_g2	TRINITY_DN44182_c11_g1	TRINITY_DN21654_c5_g3	TRINITY_DN22687_c7_g1	TRINITY_DN13086_c6_g2	TRINITY_DN19359_c8_g2	TRINITY_DN1747_c0_g1	TRINITY_DN19408_c2_g2
OG0004232	NA	NA	NA	NA	NA	NA	NA	UP	NA	8	0	1	1	1	OG0004232	TRINITY_DN326_c0_g1	TRINITY_DN19232_c5_g1	TRINITY_DN41988_c0_g1	TRINITY_DN43764_c0_g1	TRINITY_DN17893_c0_g1		TRINITY_DN17327_c0_g1	TRINITY_DN133_c0_g3	TRINITY_DN23804_c10_g1
OG0004247	NA	NA	NA	NA	NA	NA	NA	DW	NA	8	1	0	1	1	OG0004247	TRINITY_DN3300_c0_g1	TRINITY_DN18133_c2_g3	TRINITY_DN40928_c0_g1	TRINITY_DN19430_c0_g1	TRINITY_DN21291_c6_g1	TRINITY_DN14855_c8_g1	TRINITY_DN17540_c0_g1		TRINITY_DN41257_c0_g1
OG0004258	NA	NA	DW	NA	NA	NA	NA	NA	NA	8	1	0	1	1	OG0004258	TRINITY_DN33305_c0_g1	TRINITY_DN16637_c5_g4	TRINITY_DN22615_c0_g1	TRINITY_DN28793_c0_g1	TRINITY_DN22048_c5_g3	TRINITY_DN17639_c6_g1	TRINITY_DN16852_c0_g1	TRINITY_DN7782_c0_g1	TRINITY_DN21535_c2_g1
OG0004261	NA	NA	NA	NA	NA	NA	NA	UP	NA	8	0	1	1	1	OG0004261	TRINITY_DN3343_c0_g1	TRINITY_DN17482_c2_g1	TRINITY_DN48871_c4_g1	TRINITY_DN23237_c3_g1	TRINITY_DN24769_c4_g1	TRINITY_DN20712_c7_g1	TRINITY_DN20804_c11_g1	TRINITY_DN1315_c1_g2	TRINITY_DN21939_c1_g1
OG0004274	NA	NA	UP	NA	NA	NA	NA	NA	NA	8	0	1	1	1	OG0004274	TRINITY_DN3379_c0_g1	TRINITY_DN17671_c0_g1	TRINITY_DN46690_c0_g1	TRINITY_DN23407_c2_g1	TRINITY_DN19829_c5_g1	TRINITY_DN18411_c9_g1	TRINITY_DN17600_c0_g1	TRINITY_DN9118_c0_g1	TRINITY_DN18854_c3_g1
OG0004276	NA	NA	UP	NA	NA	NA	NA	NA	NA	8	0	1	1	1	OG0004276	TRINITY_DN4558_c0_g2		TRINITY_DN41241_c0_g1	TRINITY_DN20966_c0_g2	TRINITY_DN24115_c6_g1	TRINITY_DN13618_c1_g3	TRINITY_DN17629_c9_g1	TRINITY_DN1827_c1_g1	TRINITY_DN21680_c2_g1
OG0004292	DW	NA	NA	NA	NA	NA	NA	NA	NA	8	1	0	1	1	OG0004292	TRINITY_DN341_c1_g1	TRINITY_DN19627_c2_g2	TRINITY_DN48412_c5_g2	TRINITY_DN24685_c7_g2	TRINITY_DN24722_c3_g1	TRINITY_DN14361_c3_g1	TRINITY_DN21146_c4_g3	TRINITY_DN3210_c2_g1	TRINITY_DN20922_c0_g2
OG0004294	DW	NA	NA	NA	NA	NA	NA	NA	NA	8	1	0	1	1	OG0004294	TRINITY_DN3425_c0_g1	TRINITY_DN19407_c3_g4	TRINITY_DN44265_c8_g3	TRINITY_DN21721_c9_g3	TRINITY_DN19973_c4_g1	TRINITY_DN17600_c5_g1	TRINITY_DN17705_c6_g3	TRINITY_DN2307_c0_g3	TRINITY_DN18818_c5_g2
OG0004296	NA	NA	DW	NA	NA	NA	NA	NA	NA	8	1	0	1	1	OG0004296	TRINITY_DN3428_c0_g2	TRINITY_DN18791_c2_g1	TRINITY_DN42807_c0_g1	TRINITY_DN24094_c6_g2	TRINITY_DN21635_c0_g1	TRINITY_DN17627_c4_g1	TRINITY_DN20097_c4_g1	TRINITY_DN265_c6_g1	TRINITY_DN19640_c5_g4
OG0004297	NA	NA	UP	NA	NA	NA	NA	NA	NA	8	0	1	1	1	OG0004297	TRINITY_DN3428_c1_g1	TRINITY_DN16722_c4_g1	TRINITY_DN47524_c1_g1	TRINITY_DN23962_c1_g1	TRINITY_DN23288_c4_g2	TRINITY_DN14156_c8_g1	TRINITY_DN17713_c11_g4	TRINITY_DN4409_c1_g3	TRINITY_DN22390_c3_g1
OG0004298	NA	NA	NA	NA	DW	NA	NA	NA	NA	8	1	0	1	1	OG0004298	TRINITY_DN3429_c3_g2	TRINITY_DN16259_c5_g1	TRINITY_DN42902_c0_g1	TRINITY_DN21415_c0_g1	TRINITY_DN24071_c0_g1	TRINITY_DN14662_c3_g1	TRINITY_DN2101_c0_g1	TRINITY_DN4234_c0_g2	TRINITY_DN23015_c6_g1
OG0004299	NA	NA	UP	NA	NA	NA	NA	NA	NA	8	0	1	1	1	OG0004299	TRINITY_DN3436_c2_g1	TRINITY_DN17737_c3_g2	TRINITY_DN45766_c6_g1	TRINITY_DN24523_c6_g1	TRINITY_DN17956_c5_g1	TRINITY_DN19575_c11_g1	TRINITY_DN19235_c5_g1	TRINITY_DN950_c5_g1
OG0004301	DW	NA	NA	NA	NA	NA	NA	NA	NA	8	1	0	1	1	OG0004301	TRINITY_DN3449_c0_g1	TRINITY_DN17293_c11_g1	TRINITY_DN40294_c0_g1		TRINITY_DN19931_c1_g1	TRINITY_DN19931_c6_g2	TRINITY_DN16300_c0_g1	TRINITY_DN227_c0_g2	TRINITY_DN61797_c0_g1
OG0004304	NA	NA	DW	NA	NA	NA	NA	NA	NA	8	1	0	1	1	OG0004304	TRINITY_DN3456_c2_g1	TRINITY_DN19311_c1_g1	TRINITY_DN47026_c0_g3	TRINITY_DN23421_c0_g2	TRINITY_DN19180_c5_g1	TRINITY_DN17210_c3_g7	TRINITY_DN18880_c1_g3	TRINITY_DN2962_c1_g1	TRINITY_DN23874_c4_g1
OG0004308	NA	NA	NA	NA	NA	NA	NA	UP	NA	8	0	1	1	1	OG0004308	TRINITY_DN3465_c0_g2	TRINITY_DN19080_c7_g3	TRINITY_DN43205_c5_g1	TRINITY_DN23283_c7_g1	TRINITY_DN18332_c5_g5	TRINITY_DN14920_c7_g1	TRINITY_DN19545_c3_g1	TRINITY_DN7833_c0_g1	TRINITY_DN22265_c3_g5
OG0004316	NA	NA	UP	NA	NA	NA	NA	NA	NA	8	0	1	1	1	OG0004316	TRINITY_DN348_c0_g1	TRINITY_DN18531_c0_g2	TRINITY_DN48102_c0_g1	TRINITY_DN22147_c2_g4	TRINITY_DN24970_c6_g1	TRINITY_DN17887_c7_g1	TRINITY_DN20090_c4_g1	TRINITY_DN5815_c0_g1
OG0004321	NA	NA	NA	NA	UP	NA	NA	NA	NA	8	0	1	1	1	OG0004321	TRINITY_DN3508_c2_g1	TRINITY_DN16462_c2_g5	TRINITY_DN45262_c1_g3	TRINITY_DN24930_c4_g3	TRINITY_DN22158_c0_g3	TRINITY_DN17460_c4_g1	TRINITY_DN19861_c9_g1	TRINITY_DN1861_c2_g3	TRINITY_DN22260_c5_g1
OG0004331	DW	NA	NA	NA	NA	NA	NA	NA	NA	8	1	0	1	1	OG0004331	TRINITY_DN351_c0_g4	TRINITY_DN17398_c3_g1	TRINITY_DN42977_c6_g1	TRINITY_DN24864_c9_g1	TRINITY_DN21464_c2_g1	TRINITY_DN19888_c7_g1	TRINITY_DN18254_c8_g3	TRINITY_DN2592_c4_g4	TRINITY_DN21576_c6_g6
OG0004336	NA	NA	NA	NA	NA	NA	NA	DW	NA	8	1	0	1	1	OG0004336	TRINITY_DN35283_c5_g1	TRINITY_DN19237_c3_g6	TRINITY_DN22593_c0_g1	TRINITY_DN16848_c0_g1	TRINITY_DN17540_c0_g2	TRINITY_DN12811_c5_g4	TRINITY_DN20188_c2_g2
OG0004342	NA	NA	DW	NA	NA	NA	NA	NA	NA	8	1	0	1	1	OG0004342	TRINITY_DN3555_c0_g2		TRINITY_DN23499_c0_g1	TRINITY_DN22107_c0_g1	TRINITY_DN17926_c0_g1	TRINITY_DN21179_c6_g1	TRINITY_DN20529_c1_g1	TRINITY_DN5146_c0_g1	TRINITY_DN19974_c7_g1
OG0004343	NA	NA	NA	NA	NA	NA	NA	DW	NA	8	1	0	1	1	OG0004343	TRINITY_DN35597_c1_g1	TRINITY_DN26037_c0_g1	TRINITY_DN49732_c0_g1	TRINITY_DN2488_c0_g2	TRINITY_DN36503_c0_g1	TRINITY_DN13681_c3_g1	TRINITY_DN14326_c0_g1		TRINITY_DN9396_c0_g1
OG0004351	NA	NA	DW	NA	NA	NA	NA	NA	NA	8	1	0	1	1	OG0004351	TRINITY_DN3575_c0_g2	TRINITY_DN16920_c5_g1	TRINITY_DN43213_c1_g2	TRINITY_DN24713_c8_g4	TRINITY_DN19254_c4_g1	TRINITY_DN13857_c6_g2	TRINITY_DN20857_c4_g1	TRINITY_DN3539_c0_g2	TRINITY_DN22577_c3_g1
OG0004352	NA	NA	NA	NA	NA	NA	NA	UP	NA	8	0	1	1	1	OG0004352	TRINITY_DN3577_c0_g1	TRINITY_DN18479_c8_g4	TRINITY_DN47890_c0_g1	TRINITY_DN24779_c7_g1	TRINITY_DN22292_c6_g2	TRINITY_DN12318_c0_g1	TRINITY_DN16255_c0_g1	TRINITY_DN17046_c0_g1	TRINITY_DN22128_c3_g1
OG0004361	NA	NA	DW	NA	NA	NA	NA	NA	NA	8	1	0	1	1	OG0004361	TRINITY_DN3601_c0_g1	TRINITY_DN19335_c1_g1	TRINITY_DN48718_c0_g1	TRINITY_DN23180_c0_g2	TRINITY_DN21679_c5_g1	TRINITY_DN20363_c2_g1	TRINITY_DN20226_c4_g1	TRINITY_DN680_c1_g3	TRINITY_DN21887_c0_g1
OG0004386	NA	NA	NA	NA	NA	NA	NA	DW	NA	8	1	0	1	1	OG0004386	TRINITY_DN367_c0_g2		TRINITY_DN44908_c7_g2	TRINITY_DN24569_c9_g9	TRINITY_DN25081_c7_g1	TRINITY_DN15182_c8_g4	TRINITY_DN19741_c4_g1		TRINITY_DN20943_c6_g1
OG0004399	NA	NA	NA	NA	NA	NA	NA	UP	NA	8	0	1	1	1	OG0004399	TRINITY_DN372_c5_g1	TRINITY_DN19697_c5_g1	TRINITY_DN48071_c4_g1	TRINITY_DN24166_c9_g2	TRINITY_DN20431_c4_g2	TRINITY_DN16736_c3_g2	TRINITY_DN18816_c0_g1	TRINITY_DN837_c2_g2	TRINITY_DN22948_c0_g1
OG0004402	NA	NA	NA	NA	NA	NA	NA	DW	NA	8	1	0	1	1	OG0004402	TRINITY_DN46_c1_g1	TRINITY_DN19749_c5_g1	TRINITY_DN46970_c0_g1		TRINITY_DN18479_c3_g1	TRINITY_DN14121_c7_g2	TRINITY_DN18368_c0_g1		TRINITY_DN20413_c0_g1
OG0004405	NA	NA	UP	NA	NA	NA	NA	NA	NA	8	0	1	1	1	OG0004405	TRINITY_DN3743_c0_g1	TRINITY_DN15686_c0_g1	TRINITY_DN45905_c6_g2	TRINITY_DN21192_c0_g1	TRINITY_DN17966_c0_g1	TRINITY_DN12168_c0_g1	TRINITY_DN16711_c0_g1	TRINITY_DN1283_c1_g2
OG0004414	NA	NA	DW	NA	NA	NA	NA	NA	NA	8	1	0	1	1	OG0004414	TRINITY_DN375_c2_g2	TRINITY_DN19363_c9_g1	TRINITY_DN45417_c3_g1	TRINITY_DN22819_c6_g1	TRINITY_DN20712_c9_g1	TRINITY_DN20257_c7_g1	TRINITY_DN18630_c10_g1	TRINITY_DN1412_c5_g1	TRINITY_DN21858_c4_g3
OG0004422	NA	NA	NA	NA	NA	NA	NA	DW	NA	8	1	0	1	1	OG0004422	TRINITY_DN3771_c2_g1	TRINITY_DN19716_c7_g1	TRINITY_DN47136_c4_g1	TRINITY_DN22677_c8_g2	TRINITY_DN18509_c13_g2	TRINITY_DN13933_c9_g1	TRINITY_DN20944_c5_g3		TRINITY_DN18562_c5_g1
OG0004431	NA	NA	UP	NA	NA	NA	NA	NA	NA	8	0	1	1	1	OG0004431	TRINITY_DN37_c3_g1		TRINITY_DN47910_c5_g2	TRINITY_DN22174_c4_g2	TRINITY_DN20529_c6_g1	TRINITY_DN18937_c6_g1	TRINITY_DN20407_c10_g1	TRINITY_DN1552_c1_g1	TRINITY_DN20161_c5_g1
OG0004439	NA	NA	NA	NA	UP	NA	NA	NA	NA	8	0	1	1	1	OG0004439	TRINITY_DN3832_c0_g2	TRINITY_DN19507_c3_g1	TRINITY_DN47675_c0_g1	TRINITY_DN22602_c6_g1	TRINITY_DN22987_c0_g1	TRINITY_DN20674_c4_g1	TRINITY_DN18658_c5_g1	TRINITY_DN360_c0_g3	TRINITY_DN22798_c3_g1
OG0004440	DW	NA	NA	NA	NA	NA	NA	NA	NA	8	1	0	1	1	OG0004440	TRINITY_DN3834_c0_g2	TRINITY_DN16100_c0_g1	TRINITY_DN43855_c0_g1	TRINITY_DN20470_c0_g1	TRINITY_DN20282_c0_g2	TRINITY_DN15156_c9_g1	TRINITY_DN20675_c3_g3	TRINITY_DN8427_c0_g2	TRINITY_DN18395_c5_g1
OG0004445	NA	NA	UP	NA	NA	NA	NA	NA	NA	8	0	1	1	1	OG0004445	TRINITY_DN3849_c3_g1	TRINITY_DN16224_c6_g5	TRINITY_DN45281_c1_g2	TRINITY_DN21421_c0_g2	TRINITY_DN25039_c7_g1	TRINITY_DN15199_c6_g2	TRINITY_DN18924_c8_g1	TRINITY_DN2170_c0_g2	TRINITY_DN21204_c1_g3
OG0004450	NA	NA	DW	NA	NA	NA	NA	NA	NA	8	1	0	1	1	OG0004450	TRINITY_DN38543_c0_g1	TRINITY_DN18812_c7_g2	TRINITY_DN48166_c5_g1	TRINITY_DN22569_c11_g1	TRINITY_DN22293_c2_g2	TRINITY_DN15999_c1_g2	TRINITY_DN19735_c6_g1	TRINITY_DN3344_c2_g1	TRINITY_DN23105_c3_g2
OG0004456	NA	NA	NA	NA	NA	NA	NA	UP	NA	8	0	1	1	1	OG0004456	TRINITY_DN3866_c0_g1	TRINITY_DN6501_c0_g1	TRINITY_DN45379_c2_g1	TRINITY_DN23928_c9_g1	TRINITY_DN24627_c5_g1	TRINITY_DN21373_c10_g3	TRINITY_DN19327_c6_g1	TRINITY_DN1051_c0_g3	TRINITY_DN18857_c4_g3
OG0004459	NA	NA	NA	NA	NA	NA	NA	UP	NA	8	0	1	1	1	OG0004459	TRINITY_DN38749_c0_g1	TRINITY_DN6141_c0_g1	TRINITY_DN41391_c0_g1	TRINITY_DN57803_c0_g1	TRINITY_DN24339_c10_g2	TRINITY_DN19869_c2_g3	TRINITY_DN38746_c0_g1	TRINITY_DN9384_c0_g1	TRINITY_DN21943_c3_g1
OG0004467	NA	NA	NA	NA	NA	NA	NA	UP	NA	8	0	1	1	1	OG0004467	TRINITY_DN3897_c0_g1	TRINITY_DN15530_c0_g1	TRINITY_DN41106_c0_g1	TRINITY_DN20807_c0_g1	TRINITY_DN23649_c6_g1	TRINITY_DN17754_c1_g2	TRINITY_DN17070_c0_g1	TRINITY_DN8924_c0_g3	TRINITY_DN18156_c6_g1
OG0004470	NA	NA	NA	NA	NA	NA	NA	UP	NA	8	0	1	1	1	OG0004470	TRINITY_DN39008_c0_g2	TRINITY_DN18550_c6_g1	TRINITY_DN38965_c0_g1	TRINITY_DN22710_c4_g1	TRINITY_DN21286_c10_g1	TRINITY_DN14991_c3_g1	TRINITY_DN16752_c0_g1	TRINITY_DN440_c4_g2	TRINITY_DN20337_c1_g1
OG0004476	NA	NA	NA	NA	NA	NA	NA	DW	NA	8	1	0	1	1	OG0004476	TRINITY_DN3919_c0_g1	TRINITY_DN19485_c5_g1	TRINITY_DN48366_c0_g1	TRINITY_DN24589_c7_g1	TRINITY_DN23024_c7_g1	TRINITY_DN20978_c4_g1	TRINITY_DN20283_c0_g1		TRINITY_DN18096_c0_g1
OG0004479	NA	NA	DW	NA	NA	NA	NA	NA	NA	8	1	0	1	1	OG0004479	TRINITY_DN3931_c0_g2	TRINITY_DN17954_c5_g1	TRINITY_DN43890_c2_g1	TRINITY_DN23475_c4_g1	TRINITY_DN18080_c5_g1	TRINITY_DN14143_c12_g1	TRINITY_DN16305_c0_g1	TRINITY_DN7594_c5_g1	TRINITY_DN21999_c6_g1
OG0004481	NA	NA	NA	NA	UP	NA	NA	NA	NA	8	0	1	1	1	OG0004481	TRINITY_DN3935_c0_g1	TRINITY_DN17877_c4_g1	TRINITY_DN40374_c0_g1	TRINITY_DN20722_c0_g1	TRINITY_DN25196_c6_g2	TRINITY_DN16394_c6_g2	TRINITY_DN19229_c6_g4	TRINITY_DN1180_c0_g3	TRINITY_DN21917_c13_g2
OG0004483	NA	NA	DW	NA	NA	NA	NA	NA	NA	8	1	0	1	1	OG0004483	TRINITY_DN3945_c2_g1	TRINITY_DN16946_c6_g2	TRINITY_DN42100_c1_g1	TRINITY_DN19156_c0_g1	TRINITY_DN18719_c0_g1	TRINITY_DN19479_c0_g3	TRINITY_DN19661_c7_g3	TRINITY_DN1536_c3_g1	TRINITY_DN20988_c12_g1
OG0004494	NA	NA	DW	NA	NA	NA	NA	NA	NA	8	1	0	1	1	OG0004494	TRINITY_DN3982_c0_g2	TRINITY_DN19802_c9_g1	TRINITY_DN39817_c0_g1	TRINITY_DN23428_c11_g2	TRINITY_DN19892_c2_g2	TRINITY_DN13217_c5_g1	TRINITY_DN18638_c4_g2	TRINITY_DN403_c0_g2	TRINITY_DN18320_c10_g1
OG0004498	DW	NA	NA	NA	NA	NA	NA	NA	NA	8	1	0	1	1	OG0004498	TRINITY_DN39_c3_g1	TRINITY_DN18471_c7_g2	TRINITY_DN47427_c2_g1	TRINITY_DN24307_c4_g1	TRINITY_DN24941_c10_g2	TRINITY_DN16634_c5_g3	TRINITY_DN17772_c3_g5	TRINITY_DN8957_c0_g2	TRINITY_DN21855_c6_g1
OG0004504	NA	NA	NA	NA	NA	NA	NA	UP	NA	8	0	1	1	1	OG0004504	TRINITY_DN4009_c2_g1	TRINITY_DN17968_c3_g2	TRINITY_DN45198_c0_g3	TRINITY_DN20925_c0_g1	TRINITY_DN19410_c4_g1	TRINITY_DN16277_c6_g1	TRINITY_DN17741_c9_g2	TRINITY_DN199_c8_g2	TRINITY_DN22293_c2_g1
OG0004505	UP	NA	NA	NA	NA	NA	NA	NA	NA	8	0	1	1	1	OG0004505	TRINITY_DN40128_c0_g1	TRINITY_DN15401_c0_g1		TRINITY_DN58841_c0_g1	TRINITY_DN28642_c0_g1	TRINITY_DN35642_c0_g1	TRINITY_DN21274_c0_g1	TRINITY_DN6946_c4_g1
OG0004507	NA	NA	NA	NA	NA	NA	NA	UP	NA	8	0	1	1	1	OG0004507	TRINITY_DN4017_c2_g2	TRINITY_DN17774_c2_g2	TRINITY_DN47137_c4_g2	TRINITY_DN24186_c3_g1	TRINITY_DN22846_c2_g1	TRINITY_DN15743_c4_g1	TRINITY_DN18038_c10_g2	TRINITY_DN5143_c0_g1	TRINITY_DN22757_c6_g1
OG0004509	NA	NA	NA	NA	NA	NA	NA	UP	NA	8	0	1	1	1	OG0004509	TRINITY_DN4034_c0_g1	TRINITY_DN15856_c0_g1	TRINITY_DN45459_c1_g1	TRINITY_DN21447_c1_g1	TRINITY_DN19428_c0_g1	TRINITY_DN13044_c5_g1	TRINITY_DN17490_c0_g1	TRINITY_DN524_c0_g3	TRINITY_DN19853_c7_g1
OG0004512	NA	NA	NA	NA	NA	NA	NA	DW	NA	8	1	0	1	1	OG0004512	TRINITY_DN4041_c0_g1	TRINITY_DN17093_c8_g2	TRINITY_DN44991_c0_g1	TRINITY_DN21363_c0_g1	TRINITY_DN21544_c6_g1	TRINITY_DN18622_c6_g1	TRINITY_DN19536_c6_g1	TRINITY_DN3042_c0_g1	TRINITY_DN22989_c0_g2
OG0004514	NA	NA	NA	NA	UP	NA	NA	NA	NA	8	0	1	1	1	OG0004514	TRINITY_DN4042_c0_g2	TRINITY_DN18453_c1_g1	TRINITY_DN35975_c0_g1	TRINITY_DN14745_c0_g1	TRINITY_DN23104_c5_g2	TRINITY_DN12626_c1_g1	TRINITY_DN41506_c0_g1	TRINITY_DN5085_c0_g2	TRINITY_DN22531_c6_g1
OG0004517	NA	NA	DW	NA	NA	NA	NA	NA	NA	8	1	0	1	1	OG0004517	TRINITY_DN4060_c0_g1	TRINITY_DN16681_c7_g12	TRINITY_DN41117_c0_g1		TRINITY_DN24554_c2_g1	TRINITY_DN17376_c2_g1		TRINITY_DN13094_c1_g1	TRINITY_DN19143_c5_g1
OG0004525	NA	NA	UP	NA	NA	NA	NA	NA	NA	8	0	1	1	1	OG0004525	TRINITY_DN4070_c1_g2	TRINITY_DN19327_c5_g1	TRINITY_DN44323_c4_g1	TRINITY_DN24677_c3_g2	TRINITY_DN22457_c7_g3	TRINITY_DN18671_c3_g1		TRINITY_DN1332_c0_g1	TRINITY_DN19605_c1_g2
OG0004531	DW	NA	NA	NA	NA	NA	NA	NA	NA	8	1	0	1	1	OG0004531	TRINITY_DN408_c0_g2	TRINITY_DN19415_c11_g1	TRINITY_DN45842_c0_g1	TRINITY_DN22853_c4_g3	TRINITY_DN24771_c10_g1	TRINITY_DN16703_c4_g2	TRINITY_DN18066_c3_g2	TRINITY_DN2658_c0_g1	TRINITY_DN22020_c0_g3
OG0004535	NA	NA	NA	NA	UP	NA	NA	NA	NA	8	0	1	1	1	OG0004535	TRINITY_DN409_c0_g1	TRINITY_DN18725_c3_g2	TRINITY_DN47574_c0_g1	TRINITY_DN22019_c10_g1	TRINITY_DN21647_c4_g1	TRINITY_DN14281_c3_g2		TRINITY_DN3040_c0_g2	TRINITY_DN19854_c7_g2
OG0004546	NA	NA	DW	NA	NA	NA	NA	NA	NA	8	1	0	1	1	OG0004546	TRINITY_DN41261_c1_g1	TRINITY_DN18301_c3_g2	TRINITY_DN39095_c0_g3	TRINITY_DN24188_c2_g2	TRINITY_DN8518_c0_g1			TRINITY_DN20480_c3_g1	TRINITY_DN18979_c4_g2
OG0004550	NA	NA	UP	NA	NA	NA	NA	NA	NA	8	0	1	1	1	OG0004550	TRINITY_DN4139_c6_g1	TRINITY_DN19788_c1_g2	TRINITY_DN45440_c3_g1	TRINITY_DN24867_c6_g5	TRINITY_DN22328_c1_g1	TRINITY_DN18731_c5_g1	TRINITY_DN11937_c0_g1	TRINITY_DN1114_c0_g2	TRINITY_DN23880_c5_g1
OG0004567	NA	NA	NA	NA	UP	NA	NA	NA	NA	8	0	1	1	1	OG0004567	TRINITY_DN42193_c1_g1	TRINITY_DN15357_c0_g1	TRINITY_DN86183_c0_g1	TRINITY_DN6206_c0_g1	TRINITY_DN21677_c2_g3		TRINITY_DN20123_c7_g2	TRINITY_DN6575_c3_g1	TRINITY_DN23712_c12_g1
OG0004571	NA	NA	NA	NA	NA	NA	NA	DW	NA	8	1	0	1	1	OG0004571	TRINITY_DN4238_c0_g1	TRINITY_DN16408_c0_g2	TRINITY_DN42533_c4_g3	TRINITY_DN22876_c0_g1	TRINITY_DN22714_c0_g1	TRINITY_DN12619_c5_g2	TRINITY_DN11515_c0_g1		TRINITY_DN19839_c5_g6
OG0004580	UP	NA	NA	NA	NA	NA	NA	NA	NA	8	0	1	1	1	OG0004580	TRINITY_DN425_c10_g2	TRINITY_DN19768_c10_g1	TRINITY_DN44883_c6_g3	TRINITY_DN24362_c10_g1	TRINITY_DN24882_c12_g1	TRINITY_DN12810_c0_g1	TRINITY_DN18146_c10_g3	TRINITY_DN599_c0_g1	TRINITY_DN5222_c0_g2
OG0004581	NA	NA	DW	NA	NA	NA	NA	NA	NA	8	1	0	1	1	OG0004581	TRINITY_DN425_c1_g2	TRINITY_DN16674_c6_g2	TRINITY_DN46074_c2_g1	TRINITY_DN23973_c9_g1	TRINITY_DN24588_c6_g2	TRINITY_DN21180_c8_g1	TRINITY_DN19535_c8_g1	TRINITY_DN2145_c0_g1	TRINITY_DN20432_c3_g1
OG0004587	NA	NA	NA	NA	NA	NA	NA	DW	NA	8	1	0	1	1	OG0004587	TRINITY_DN42731_c1_g1	TRINITY_DN18560_c4_g6	TRINITY_DN60236_c0_g1	TRINITY_DN51809_c0_g1		TRINITY_DN16128_c1_g2	TRINITY_DN11113_c0_g1		TRINITY_DN22272_c10_g1
OG0004588	NA	NA	NA	NA	NA	NA	NA	UP	NA	8	0	1	1	1	OG0004588	TRINITY_DN4276_c1_g5	TRINITY_DN17767_c7_g7	TRINITY_DN40222_c0_g1	TRINITY_DN21850_c9_g2	TRINITY_DN18088_c10_g3	TRINITY_DN21359_c5_g1	TRINITY_DN18934_c9_g5	TRINITY_DN17358_c0_g1	TRINITY_DN22521_c4_g2
OG0004595	NA	NA	NA	NA	NA	NA	NA	UP	NA	8	0	1	1	1	OG0004595	TRINITY_DN4290_c0_g2	TRINITY_DN15542_c0_g1	TRINITY_DN44838_c8_g1	TRINITY_DN15246_c0_g1	TRINITY_DN18177_c9_g1	TRINITY_DN16250_c6_g1	TRINITY_DN16815_c0_g1	TRINITY_DN13034_c0_g2	TRINITY_DN23385_c5_g1
OG0004601	NA	NA	UP	NA	NA	NA	NA	NA	NA	8	0	1	1	1	OG0004601	TRINITY_DN4312_c0_g1	TRINITY_DN17119_c6_g1	TRINITY_DN41230_c0_g1	TRINITY_DN24879_c6_g2	TRINITY_DN20194_c5_g1	TRINITY_DN12110_c0_g1	TRINITY_DN16851_c0_g1	TRINITY_DN5345_c0_g1	TRINITY_DN22699_c0_g3
OG0004606	NA	NA	DW	NA	NA	NA	NA	NA	NA	8	1	0	1	1	OG0004606	TRINITY_DN43288_c1_g1	TRINITY_DN14827_c0_g1	TRINITY_DN12695_c0_g1	TRINITY_DN52466_c0_g1	TRINITY_DN6085_c0_g2	TRINITY_DN10920_c0_g1	TRINITY_DN3662_c0_g1	TRINITY_DN17262_c0_g1	TRINITY_DN18465_c9_g1
OG0004611	NA	NA	UP	NA	NA	NA	NA	NA	NA	8	0	1	1	1	OG0004611	TRINITY_DN4341_c0_g1	TRINITY_DN18345_c0_g1	TRINITY_DN40293_c0_g1	TRINITY_DN20936_c0_g2	TRINITY_DN18808_c5_g1	TRINITY_DN15926_c1_g1	TRINITY_DN16882_c0_g1	TRINITY_DN1184_c1_g1	TRINITY_DN20014_c3_g1
OG0004616	NA	NA	NA	NA	NA	NA	NA	UP	NA	8	0	1	1	1	OG0004616	TRINITY_DN4360_c0_g2	TRINITY_DN18741_c4_g4	TRINITY_DN47212_c4_g3	TRINITY_DN22288_c6_g4	TRINITY_DN20967_c4_g1	TRINITY_DN13214_c5_g1		TRINITY_DN1518_c5_g1	TRINITY_DN23601_c2_g1
OG0004618	NA	NA	UP	NA	NA	NA	NA	NA	NA	8	0	1	1	1	OG0004618	TRINITY_DN4360_c8_g1	TRINITY_DN16452_c10_g6	TRINITY_DN35069_c0_g1	TRINITY_DN22288_c6_g10	TRINITY_DN17701_c0_g2	TRINITY_DN19310_c4_g1	TRINITY_DN23540_c0_g1	TRINITY_DN3620_c0_g1	TRINITY_DN21126_c0_g2
OG0004619	NA	NA	DW	NA	NA	NA	NA	NA	NA	8	1	0	1	1	OG0004619	TRINITY_DN4363_c0_g1	TRINITY_DN19597_c6_g5	TRINITY_DN48784_c3_g2	TRINITY_DN23503_c2_g5	TRINITY_DN21899_c2_g1	TRINITY_DN20784_c6_g1	TRINITY_DN19782_c1_g1	TRINITY_DN2334_c0_g1	TRINITY_DN22818_c9_g1
OG0004654	UP	NA	NA	NA	NA	NA	NA	NA	NA	8	0	1	1	1	OG0004654	TRINITY_DN446_c1_g1	TRINITY_DN17465_c6_g1	TRINITY_DN47446_c5_g2	TRINITY_DN23965_c6_g3	TRINITY_DN21961_c6_g1	TRINITY_DN16884_c4_g1	TRINITY_DN18569_c8_g1	TRINITY_DN176_c1_g4	TRINITY_DN19406_c1_g4
OG0004669	NA	NA	NA	NA	NA	NA	NA	DW	NA	8	1	0	1	1	OG0004669	TRINITY_DN4507_c0_g1	TRINITY_DN19357_c1_g1	TRINITY_DN47303_c1_g1	TRINITY_DN22697_c5_g1	TRINITY_DN22286_c2_g1	TRINITY_DN15303_c4_g1	TRINITY_DN18867_c3_g1	TRINITY_DN1623_c0_g4	TRINITY_DN21659_c9_g1
OG0004672	UP	NA	NA	NA	NA	NA	NA	NA	NA	8	0	1	1	1	OG0004672	TRINITY_DN4519_c0_g1	TRINITY_DN15687_c0_g2	TRINITY_DN43126_c0_g1	TRINITY_DN24123_c6_g3	TRINITY_DN19197_c7_g1	TRINITY_DN12415_c10_g2	TRINITY_DN16930_c0_g1	TRINITY_DN999_c0_g2	TRINITY_DN23793_c1_g2
OG0004674	NA	NA	NA	NA	NA	NA	NA	UP	NA	8	0	1	1	1	OG0004674	TRINITY_DN4520_c3_g1	TRINITY_DN19540_c5_g5	TRINITY_DN40167_c1_g1	TRINITY_DN22833_c0_g2	TRINITY_DN23187_c6_g1	TRINITY_DN16611_c12_g2	TRINITY_DN20809_c5_g3	TRINITY_DN1748_c1_g3	TRINITY_DN23691_c9_g1
OG0004675	DW	NA	NA	NA	NA	NA	NA	NA	NA	8	1	0	1	1	OG0004675	TRINITY_DN4524_c1_g1	TRINITY_DN17488_c8_g1	TRINITY_DN47050_c4_g1	TRINITY_DN22392_c6_g4	TRINITY_DN27448_c0_g1	TRINITY_DN20849_c3_g1	TRINITY_DN19528_c2_g1	TRINITY_DN753_c6_g2	TRINITY_DN19838_c7_g1
OG0004690	NA	NA	NA	NA	NA	NA	NA	DW	NA	8	1	0	1	1	OG0004690	TRINITY_DN4583_c0_g1	TRINITY_DN18103_c6_g1	TRINITY_DN44085_c5_g1	TRINITY_DN24008_c3_g4	TRINITY_DN19880_c1_g1	TRINITY_DN21076_c8_g1	TRINITY_DN20555_c3_g1		TRINITY_DN23033_c2_g1
OG0004701	NA	NA	NA	NA	NA	NA	NA	UP	NA	8	0	1	1	1	OG0004701	TRINITY_DN4603_c0_g1	TRINITY_DN15635_c0_g1	TRINITY_DN45971_c0_g2	TRINITY_DN23417_c3_g1	TRINITY_DN17623_c0_g1	TRINITY_DN15661_c3_g1	TRINITY_DN17402_c0_g1	TRINITY_DN7220_c0_g1	TRINITY_DN21357_c8_g1
OG0004705	DW	NA	NA	NA	NA	NA	NA	NA	NA	8	1	0	1	1	OG0004705	TRINITY_DN4619_c1_g2	TRINITY_DN17944_c4_g1	TRINITY_DN39912_c0_g1	TRINITY_DN29620_c0_g1	TRINITY_DN24852_c4_g2	TRINITY_DN13910_c5_g1	TRINITY_DN17906_c13_g1	TRINITY_DN2131_c5_g1	TRINITY_DN19551_c5_g8
OG0004706	NA	NA	NA	NA	NA	NA	NA	NA	DW	8	1	0	1	1	OG0004706	TRINITY_DN461_c2_g1	TRINITY_DN17504_c1_g2	TRINITY_DN48311_c5_g1	TRINITY_DN23924_c7_g1	TRINITY_DN21625_c7_g1	TRINITY_DN14036_c2_g5	TRINITY_DN17559_c4_g1	TRINITY_DN567_c0_g1	TRINITY_DN21978_c5_g7
OG0004714	NA	NA	UP	NA	NA	NA	NA	NA	NA	8	0	1	1	1	OG0004714	TRINITY_DN4631_c4_g1	TRINITY_DN17955_c5_g9	TRINITY_DN41901_c5_g1	TRINITY_DN23738_c11_g2	TRINITY_DN24613_c6_g2	TRINITY_DN12728_c6_g1	TRINITY_DN17492_c8_g7	TRINITY_DN1391_c1_g2	TRINITY_DN18975_c4_g2
OG0004745	NA	NA	NA	NA	NA	NA	NA	DW	NA	8	1	0	1	1	OG0004745	TRINITY_DN4725_c1_g1	TRINITY_DN19207_c2_g1	TRINITY_DN46578_c0_g1	TRINITY_DN22157_c1_g1	TRINITY_DN21269_c3_g1	TRINITY_DN20381_c5_g1	TRINITY_DN20796_c6_g1		TRINITY_DN22589_c5_g1
OG0004751	NA	NA	DW	NA	NA	NA	NA	NA	NA	8	1	0	1	1	OG0004751	TRINITY_DN4740_c0_g1	TRINITY_DN18689_c11_g1	TRINITY_DN39655_c0_g1	TRINITY_DN22547_c6_g1	TRINITY_DN18241_c7_g1	TRINITY_DN16248_c7_g1	TRINITY_DN17248_c0_g1	TRINITY_DN4460_c2_g2	TRINITY_DN22211_c1_g2
OG0004759	NA	NA	DW	NA	NA	NA	NA	NA	NA	8	1	0	1	1	OG0004759	TRINITY_DN475_c2_g1	TRINITY_DN18740_c5_g1	TRINITY_DN47529_c4_g2	TRINITY_DN22977_c7_g1	TRINITY_DN23018_c0_g1	TRINITY_DN20068_c8_g2	TRINITY_DN19634_c4_g1	TRINITY_DN574_c3_g1	TRINITY_DN18633_c0_g1
OG0004760	NA	NA	NA	NA	NA	NA	NA	UP	NA	8	0	1	1	1	OG0004760	TRINITY_DN4765_c0_g2	TRINITY_DN17075_c3_g2	TRINITY_DN40839_c0_g1	TRINITY_DN17612_c0_g1	TRINITY_DN17704_c0_g1	TRINITY_DN14351_c2_g1	TRINITY_DN16106_c0_g1	TRINITY_DN6788_c1_g2	TRINITY_DN20697_c8_g2
OG0004765	NA	NA	UP	NA	NA	NA	NA	NA	NA	8	0	1	1	1	OG0004765	TRINITY_DN477_c0_g2	TRINITY_DN19704_c2_g3	TRINITY_DN43755_c1_g3	TRINITY_DN24382_c8_g1	TRINITY_DN21578_c9_g1	TRINITY_DN16855_c4_g1	TRINITY_DN19760_c16_g1	TRINITY_DN2634_c2_g4	TRINITY_DN21005_c5_g1
OG0004794	NA	NA	NA	NA	NA	NA	NA	DW	NA	8	1	0	1	1	OG0004794	TRINITY_DN489_c4_g1	TRINITY_DN18044_c5_g8	TRINITY_DN48935_c4_g4	TRINITY_DN23205_c8_g2	TRINITY_DN25276_c6_g1	TRINITY_DN18174_c2_g2	TRINITY_DN21033_c4_g6		TRINITY_DN19509_c1_g1
OG0004807	NA	NA	NA	NA	NA	NA	NA	NA	DW	8	1	0	1	1	OG0004807	TRINITY_DN494_c7_g1	TRINITY_DN16486_c4_g8	TRINITY_DN44891_c4_g1	TRINITY_DN22449_c8_g3	TRINITY_DN18152_c6_g6	TRINITY_DN18155_c7_g4	TRINITY_DN20249_c4_g9	TRINITY_DN2911_c0_g2	TRINITY_DN23888_c2_g2
OG0004810	UP	NA	NA	NA	NA	NA	NA	NA	NA	8	0	1	1	1	OG0004810	TRINITY_DN4969_c0_g2	TRINITY_DN18888_c4_g2	TRINITY_DN46437_c0_g1	TRINITY_DN23644_c5_g2	TRINITY_DN17800_c0_g2	TRINITY_DN19046_c6_g1	TRINITY_DN19103_c4_g1	TRINITY_DN3613_c0_g3	TRINITY_DN18185_c5_g1
OG0004811	NA	DW	NA	NA	NA	NA	NA	NA	NA	8	1	0	1	1	OG0004811	TRINITY_DN496_c0_g1	TRINITY_DN15817_c0_g1	TRINITY_DN43337_c0_g1	TRINITY_DN21240_c11_g1	TRINITY_DN18063_c4_g1	TRINITY_DN14172_c3_g1	TRINITY_DN16964_c0_g2	TRINITY_DN2202_c0_g2	TRINITY_DN18411_c2_g4
OG0004844	NA	NA	NA	NA	NA	NA	NA	NA	UP	8	0	1	1	1	OG0004844	TRINITY_DN5101_c14_g1	TRINITY_DN18845_c2_g4	TRINITY_DN63420_c0_g1	TRINITY_DN18406_c0_g1	TRINITY_DN4915_c0_g1	TRINITY_DN12826_c3_g6	TRINITY_DN19085_c1_g1	TRINITY_DN4431_c2_g3	TRINITY_DN21882_c7_g1
OG0004853	NA	NA	DW	NA	NA	NA	NA	NA	NA	8	1	0	1	1	OG0004853	TRINITY_DN5143_c0_g1	TRINITY_DN17489_c10_g1	TRINITY_DN47719_c7_g2	TRINITY_DN24469_c13_g1	TRINITY_DN24196_c2_g2	TRINITY_DN20128_c10_g4	TRINITY_DN18207_c5_g6	TRINITY_DN1536_c3_g5	TRINITY_DN20529_c4_g2
OG0004865	NA	NA	DW	NA	NA	NA	NA	NA	NA	8	1	0	1	1	OG0004865	TRINITY_DN519_c1_g1	TRINITY_DN18615_c1_g9	TRINITY_DN40441_c0_g1	TRINITY_DN22653_c1_g3	TRINITY_DN20402_c3_g1	TRINITY_DN12902_c6_g1	TRINITY_DN20551_c4_g2	TRINITY_DN2513_c5_g1	TRINITY_DN21034_c7_g3
OG0004868	UP	NA	NA	NA	NA	NA	NA	NA	NA	8	0	1	1	1	OG0004868	TRINITY_DN5205_c0_g1	TRINITY_DN16176_c7_g1	TRINITY_DN43195_c11_g1	TRINITY_DN22492_c4_g1	TRINITY_DN16812_c0_g1	TRINITY_DN17205_c5_g1	TRINITY_DN17574_c8_g1	TRINITY_DN2985_c0_g4	TRINITY_DN57332_c0_g1
OG0004894	DW	NA	NA	NA	NA	NA	NA	NA	NA	8	1	0	1	1	OG0004894	TRINITY_DN5299_c0_g1	TRINITY_DN19645_c8_g1	TRINITY_DN41499_c0_g1	TRINITY_DN22793_c7_g3	TRINITY_DN21702_c3_g1	TRINITY_DN20093_c2_g1	TRINITY_DN17986_c9_g1	TRINITY_DN650_c0_g1	TRINITY_DN20100_c5_g2
OG0004906	NA	NA	NA	NA	UP	NA	NA	NA	NA	8	0	1	1	1	OG0004906	TRINITY_DN535_c0_g3	TRINITY_DN18890_c5_g2	TRINITY_DN47488_c2_g2	TRINITY_DN24305_c12_g5	TRINITY_DN18423_c7_g2	TRINITY_DN17910_c8_g2	TRINITY_DN18916_c1_g1	TRINITY_DN805_c1_g2	TRINITY_DN22712_c8_g1
OG0004910	DW	NA	NA	NA	NA	NA	NA	NA	NA	8	1	0	1	1	OG0004910	TRINITY_DN537_c7_g2	TRINITY_DN17222_c8_g3	TRINITY_DN47499_c0_g1	TRINITY_DN22158_c5_g1	TRINITY_DN22615_c0_g1	TRINITY_DN18167_c6_g2	TRINITY_DN19493_c6_g2	TRINITY_DN674_c5_g1	TRINITY_DN20215_c4_g1
OG0004916	NA	NA	NA	NA	NA	NA	NA	NA	UP	8	0	1	1	1	OG0004916	TRINITY_DN53_c6_g2	TRINITY_DN18768_c0_g2	TRINITY_DN42149_c2_g4	TRINITY_DN22171_c6_g2	TRINITY_DN21311_c7_g1	TRINITY_DN14179_c6_g1	TRINITY_DN12211_c0_g1	TRINITY_DN11261_c0_g1	TRINITY_DN18588_c3_g2
OG0004918	NA	NA	DW	NA	NA	NA	NA	NA	NA	8	1	0	1	1	OG0004918	TRINITY_DN540_c0_g1		TRINITY_DN39471_c0_g1	TRINITY_DN24903_c4_g2	TRINITY_DN23945_c4_g2	TRINITY_DN20583_c1_g1	TRINITY_DN20284_c6_g1	TRINITY_DN111_c2_g2	TRINITY_DN23074_c4_g1
OG0004921	NA	NA	DW	NA	NA	NA	NA	NA	NA	8	1	0	1	1	OG0004921	TRINITY_DN5426_c0_g2	TRINITY_DN11819_c0_g1	TRINITY_DN37758_c0_g1	TRINITY_DN18195_c0_g1	TRINITY_DN17406_c0_g1	TRINITY_DN18509_c3_g1		TRINITY_DN905_c3_g3	TRINITY_DN21233_c0_g2
OG0004926	NA	NA	DW	NA	NA	NA	NA	NA	NA	8	1	0	1	1	OG0004926	TRINITY_DN5447_c0_g2	TRINITY_DN19654_c4_g1	TRINITY_DN45348_c5_g2	TRINITY_DN21587_c7_g1	TRINITY_DN19945_c9_g2	TRINITY_DN16951_c5_g1	TRINITY_DN21268_c10_g2	TRINITY_DN2333_c0_g2	TRINITY_DN21164_c8_g1
OG0004933	UP	NA	NA	NA	NA	NA	NA	NA	NA	8	0	1	1	1	OG0004933	TRINITY_DN54761_c1_g1	TRINITY_DN13569_c0_g1	TRINITY_DN37857_c0_g1	TRINITY_DN15227_c0_g1	TRINITY_DN4827_c0_g2	TRINITY_DN8336_c0_g2	TRINITY_DN44928_c0_g1	TRINITY_DN15028_c0_g1	TRINITY_DN19047_c6_g11
OG0004936	NA	NA	DW	NA	NA	NA	NA	NA	NA	8	1	0	1	1	OG0004936	TRINITY_DN5485_c1_g1		TRINITY_DN42108_c1_g1	TRINITY_DN23552_c7_g1	TRINITY_DN19376_c3_g1	TRINITY_DN19902_c7_g2	TRINITY_DN17716_c6_g3	TRINITY_DN8010_c0_g1	TRINITY_DN23086_c10_g1
OG0004940	NA	NA	NA	NA	UP	NA	NA	NA	NA	8	0	1	1	1	OG0004940	TRINITY_DN54_c1_g2	TRINITY_DN18752_c3_g2	TRINITY_DN41855_c0_g1	TRINITY_DN23512_c9_g1	TRINITY_DN22378_c5_g2	TRINITY_DN19951_c5_g1	TRINITY_DN18508_c6_g3	TRINITY_DN845_c0_g1	TRINITY_DN21352_c7_g1
OG0004955	NA	NA	NA	NA	NA	NA	NA	NA	UP	8	0	1	1	1	OG0004955	TRINITY_DN555_c0_g2	TRINITY_DN17594_c2_g2	TRINITY_DN47592_c0_g2	TRINITY_DN23418_c2_g1	TRINITY_DN21109_c8_g1	TRINITY_DN21328_c4_g1	TRINITY_DN20862_c3_g1	TRINITY_DN4688_c0_g1	TRINITY_DN23626_c9_g2
OG0004974	NA	NA	DW	NA	NA	NA	NA	NA	NA	8	1	0	1	1	OG0004974	TRINITY_DN5688_c1_g1	TRINITY_DN16913_c4_g5	TRINITY_DN41221_c0_g1	TRINITY_DN24739_c3_g1		TRINITY_DN14001_c2_g2	TRINITY_DN17776_c6_g3	TRINITY_DN5958_c0_g1	TRINITY_DN19374_c1_g1
OG0004976	NA	NA	UP	NA	NA	NA	NA	NA	NA	8	0	1	1	1	OG0004976	TRINITY_DN5696_c0_g2	TRINITY_DN19527_c6_g1	TRINITY_DN46170_c5_g1	TRINITY_DN21760_c8_g1	TRINITY_DN22909_c8_g1	TRINITY_DN20414_c5_g1	TRINITY_DN19545_c5_g1	TRINITY_DN1538_c1_g1	TRINITY_DN21212_c1_g1
OG0004977	NA	NA	NA	NA	UP	NA	NA	NA	NA	8	0	1	1	1	OG0004977	TRINITY_DN569_c5_g1	TRINITY_DN16181_c8_g1	TRINITY_DN40527_c0_g1	TRINITY_DN23441_c11_g3	TRINITY_DN23513_c8_g1	TRINITY_DN13816_c4_g1	TRINITY_DN17141_c1_g1	TRINITY_DN2724_c1_g1	TRINITY_DN18389_c3_g1
OG0004979	NA	NA	NA	NA	NA	NA	NA	UP	NA	8	0	1	1	1	OG0004979	TRINITY_DN5708_c0_g1	TRINITY_DN16955_c4_g4	TRINITY_DN41296_c0_g1	TRINITY_DN21496_c14_g1	TRINITY_DN19899_c6_g1	TRINITY_DN16235_c5_g1	TRINITY_DN20558_c2_g1	TRINITY_DN2524_c0_g3	TRINITY_DN18969_c5_g1
OG0004997	UP	NA	NA	NA	NA	NA	NA	NA	NA	8	0	1	1	1	OG0004997	TRINITY_DN579_c0_g2	TRINITY_DN17988_c3_g2	TRINITY_DN48915_c3_g1	TRINITY_DN24444_c2_g3	TRINITY_DN25113_c3_g1	TRINITY_DN21066_c6_g1	TRINITY_DN20795_c4_g1	TRINITY_DN3383_c0_g1	TRINITY_DN23884_c2_g1
OG0005003	NA	NA	DW	NA	NA	NA	NA	NA	NA	8	1	0	1	1	OG0005003	TRINITY_DN5811_c2_g1	TRINITY_DN17573_c1_g3	TRINITY_DN47371_c0_g1	TRINITY_DN21600_c0_g1	TRINITY_DN22538_c5_g1	TRINITY_DN20633_c1_g1	TRINITY_DN18859_c0_g2	TRINITY_DN3021_c0_g2	TRINITY_DN21629_c1_g2
OG0005006	DW	NA	NA	NA	NA	NA	NA	NA	NA	8	1	0	1	1	OG0005006	TRINITY_DN5822_c2_g1	TRINITY_DN19260_c7_g1	TRINITY_DN43871_c1_g1	TRINITY_DN23221_c8_g1	TRINITY_DN24057_c0_g1	TRINITY_DN19507_c3_g1	TRINITY_DN20978_c5_g1	TRINITY_DN815_c0_g2	TRINITY_DN20731_c6_g2
OG0005013	NA	NA	DW	NA	NA	NA	NA	NA	NA	8	1	0	1	1	OG0005013	TRINITY_DN5857_c1_g1	TRINITY_DN19576_c2_g1	TRINITY_DN43378_c3_g1	TRINITY_DN21660_c0_g3	TRINITY_DN22532_c5_g1	TRINITY_DN12433_c4_g1	TRINITY_DN19155_c8_g2	TRINITY_DN1724_c3_g1	TRINITY_DN18958_c5_g13
OG0005024	NA	NA	UP	NA	NA	NA	NA	NA	NA	8	0	1	1	1	OG0005024	TRINITY_DN5890_c0_g1	TRINITY_DN19685_c5_g2	TRINITY_DN38392_c0_g1	TRINITY_DN20717_c0_g2	TRINITY_DN17775_c1_g2	TRINITY_DN15315_c6_g2	TRINITY_DN20645_c0_g2	TRINITY_DN2112_c0_g1	TRINITY_DN20582_c9_g1
OG0005025	UP	NA	NA	NA	NA	NA	NA	NA	NA	8	0	1	1	1	OG0005025	TRINITY_DN5897_c2_g2	TRINITY_DN16500_c6_g4	TRINITY_DN46427_c0_g1	TRINITY_DN23603_c2_g1	TRINITY_DN24763_c4_g1	TRINITY_DN19331_c12_g1	TRINITY_DN19062_c0_g1	TRINITY_DN2108_c0_g1	TRINITY_DN18478_c3_g1
OG0005028	NA	NA	UP	NA	NA	NA	NA	NA	NA	8	0	1	1	1	OG0005028	TRINITY_DN5912_c4_g1	TRINITY_DN17890_c2_g3	TRINITY_DN36191_c0_g1	TRINITY_DN20118_c0_g1	TRINITY_DN21555_c2_g1	TRINITY_DN15067_c7_g2	TRINITY_DN16226_c0_g1	TRINITY_DN57588_c0_g1	TRINITY_DN17829_c0_g1
OG0005055	NA	NA	NA	NA	UP	NA	NA	NA	NA	8	0	1	1	1	OG0005055	TRINITY_DN604_c0_g1	TRINITY_DN18144_c5_g1	TRINITY_DN47957_c0_g2	TRINITY_DN22699_c4_g1	TRINITY_DN24420_c6_g2	TRINITY_DN18280_c2_g1	TRINITY_DN18769_c5_g5	TRINITY_DN1638_c2_g1	TRINITY_DN22285_c3_g1
OG0005057	UP	NA	NA	NA	NA	NA	NA	NA	NA	8	0	1	1	1	OG0005057	TRINITY_DN605_c7_g1	TRINITY_DN18787_c3_g2	TRINITY_DN43767_c8_g1	TRINITY_DN20885_c0_g4	TRINITY_DN20775_c2_g1	TRINITY_DN13011_c5_g2	TRINITY_DN19718_c5_g1	TRINITY_DN6378_c2_g1	TRINITY_DN18946_c2_g6
OG0005058	NA	NA	DW	NA	NA	NA	NA	NA	NA	8	1	0	1	1	OG0005058	TRINITY_DN6067_c0_g2	TRINITY_DN17730_c3_g1	TRINITY_DN30084_c0_g1	TRINITY_DN1372_c0_g1		TRINITY_DN14786_c3_g1	TRINITY_DN20448_c5_g3	TRINITY_DN634_c1_g4	TRINITY_DN22480_c1_g1
OG0005068	NA	NA	UP	NA	NA	NA	NA	NA	NA	8	0	1	1	1	OG0005068	TRINITY_DN612_c1_g2	TRINITY_DN16372_c5_g6	TRINITY_DN44054_c5_g3	TRINITY_DN22491_c8_g3	TRINITY_DN22187_c11_g1	TRINITY_DN17397_c7_g1	TRINITY_DN20030_c6_g3	TRINITY_DN4776_c1_g1
OG0005070	NA	NA	DW	NA	NA	NA	NA	NA	NA	8	1	0	1	1	OG0005070	TRINITY_DN614_c1_g1	TRINITY_DN17889_c5_g5	TRINITY_DN46036_c7_g2	TRINITY_DN21003_c0_g1	TRINITY_DN22012_c7_g1	TRINITY_DN21318_c8_g1	TRINITY_DN20365_c4_g1	TRINITY_DN1780_c1_g1	TRINITY_DN21235_c7_g1
OG0005075	NA	NA	NA	NA	NA	NA	NA	DW	NA	8	1	0	1	1	OG0005075	TRINITY_DN615_c1_g1	TRINITY_DN17152_c1_g5	TRINITY_DN48768_c6_g1	TRINITY_DN21784_c6_g2	TRINITY_DN23764_c3_g1	TRINITY_DN19329_c1_g1	TRINITY_DN18699_c6_g3		TRINITY_DN23244_c3_g2
OG0005080	NA	NA	NA	NA	NA	NA	NA	NA	DW	8	1	0	1	1	OG0005080	TRINITY_DN6176_c0_g2	TRINITY_DN17607_c7_g1	TRINITY_DN43045_c0_g1	TRINITY_DN23975_c2_g1	TRINITY_DN21659_c5_g4	TRINITY_DN18930_c0_g2	TRINITY_DN19648_c2_g1	TRINITY_DN580_c0_g6	TRINITY_DN19118_c9_g1
OG0005090	NA	NA	DW	NA	NA	NA	NA	NA	NA	8	1	0	1	1	OG0005090	TRINITY_DN6232_c0_g1	TRINITY_DN17041_c3_g1	TRINITY_DN40835_c0_g1	TRINITY_DN24780_c13_g2	TRINITY_DN20000_c0_g1	TRINITY_DN13114_c6_g1	TRINITY_DN19867_c9_g2	TRINITY_DN2905_c0_g2	TRINITY_DN61319_c0_g1
OG0005093	UP	NA	NA	NA	NA	NA	NA	NA	NA	8	0	1	1	1	OG0005093	TRINITY_DN6267_c0_g2	TRINITY_DN15558_c0_g1	TRINITY_DN40741_c0_g1	TRINITY_DN22066_c2_g1	TRINITY_DN23177_c1_g1	TRINITY_DN16965_c4_g2	TRINITY_DN20139_c1_g1	TRINITY_DN3000_c0_g2	TRINITY_DN18869_c10_g2
OG0005107	NA	NA	NA	NA	NA	NA	NA	UP	NA	8	0	1	1	1	OG0005107	TRINITY_DN6355_c1_g2	TRINITY_DN15627_c0_g1	TRINITY_DN43949_c0_g1	TRINITY_DN23662_c2_g2	TRINITY_DN18891_c3_g1	TRINITY_DN12730_c5_g1	TRINITY_DN16416_c0_g1	TRINITY_DN2378_c0_g1	TRINITY_DN20889_c1_g1
OG0005115	NA	NA	UP	NA	NA	NA	NA	NA	NA	8	0	1	1	1	OG0005115	TRINITY_DN6411_c0_g2	TRINITY_DN16182_c0_g1	TRINITY_DN39692_c0_g1	TRINITY_DN21064_c0_g1	TRINITY_DN21357_c7_g1	TRINITY_DN12203_c0_g1	TRINITY_DN17109_c0_g1	TRINITY_DN1665_c1_g3	TRINITY_DN21864_c3_g1
OG0005149	NA	NA	NA	NA	NA	NA	NA	UP	NA	8	0	1	1	1	OG0005149	TRINITY_DN6577_c0_g1	TRINITY_DN19438_c3_g1	TRINITY_DN45950_c0_g1	TRINITY_DN22457_c8_g2	TRINITY_DN23432_c3_g1	TRINITY_DN15633_c3_g1	TRINITY_DN17000_c0_g1	TRINITY_DN8278_c0_g2	TRINITY_DN19950_c5_g1
OG0005162	NA	NA	NA	NA	NA	NA	NA	UP	NA	8	0	1	1	1	OG0005162	TRINITY_DN6688_c0_g2	TRINITY_DN16432_c0_g1	TRINITY_DN47842_c5_g1	TRINITY_DN24159_c4_g2	TRINITY_DN22440_c2_g1	TRINITY_DN17169_c2_g1	TRINITY_DN20012_c3_g1	TRINITY_DN2929_c2_g2	TRINITY_DN21269_c2_g1
OG0005178	NA	NA	NA	NA	NA	NA	NA	NA	DW	8	1	0	1	1	OG0005178	TRINITY_DN6752_c1_g1	TRINITY_DN14833_c0_g1	TRINITY_DN40886_c0_g1	TRINITY_DN19314_c0_g1	TRINITY_DN20482_c9_g1	TRINITY_DN12058_c0_g1	TRINITY_DN20682_c14_g1	TRINITY_DN4881_c0_g1	TRINITY_DN17840_c0_g1
OG0005189	NA	NA	NA	NA	NA	NA	NA	DW	NA	8	1	0	1	1	OG0005189	TRINITY_DN6856_c0_g1	TRINITY_DN19695_c6_g1	TRINITY_DN44437_c0_g1	TRINITY_DN23129_c5_g2	TRINITY_DN24691_c4_g1	TRINITY_DN20589_c4_g1	TRINITY_DN18901_c5_g2		TRINITY_DN23619_c5_g1
OG0005196	UP	NA	NA	NA	NA	NA	NA	NA	NA	8	0	1	1	1	OG0005196	TRINITY_DN687_c2_g1	TRINITY_DN18419_c4_g1	TRINITY_DN41440_c0_g2	TRINITY_DN20826_c0_g1	TRINITY_DN19645_c10_g1	TRINITY_DN15861_c2_g1	TRINITY_DN19297_c9_g1	TRINITY_DN2175_c2_g2	TRINITY_DN22739_c5_g1
OG0005222	NA	NA	NA	NA	NA	NA	NA	UP	NA	8	0	1	1	1	OG0005222	TRINITY_DN6980_c0_g1	TRINITY_DN15902_c1_g1	TRINITY_DN41043_c0_g1	TRINITY_DN20522_c0_g1	TRINITY_DN24607_c6_g1	TRINITY_DN12032_c0_g1	TRINITY_DN19871_c4_g3	TRINITY_DN6204_c0_g1	TRINITY_DN19414_c7_g1
OG0005224	UP	NA	NA	NA	NA	NA	NA	NA	NA	8	0	1	1	1	OG0005224	TRINITY_DN7009_c1_g1	TRINITY_DN19158_c5_g2	TRINITY_DN43185_c0_g1	TRINITY_DN20285_c0_g1	TRINITY_DN23576_c8_g2	TRINITY_DN14268_c0_g1	TRINITY_DN18917_c1_g1	TRINITY_DN15290_c2_g2	TRINITY_DN20753_c12_g1
OG0005226	NA	NA	NA	NA	NA	NA	NA	DW	NA	8	1	0	1	1	OG0005226	TRINITY_DN700_c0_g3	TRINITY_DN19554_c2_g1	TRINITY_DN44114_c5_g2	TRINITY_DN24751_c3_g1	TRINITY_DN19844_c7_g1	TRINITY_DN20952_c5_g2	TRINITY_DN19673_c4_g2		TRINITY_DN23567_c2_g1
OG0005239	NA	NA	NA	NA	NA	NA	NA	UP	NA	8	0	1	1	1	OG0005239	TRINITY_DN7103_c0_g2	TRINITY_DN15525_c0_g1	TRINITY_DN40745_c0_g1	TRINITY_DN21532_c10_g5	TRINITY_DN19659_c4_g1	TRINITY_DN14722_c5_g3	TRINITY_DN16591_c0_g1	TRINITY_DN12263_c0_g1	TRINITY_DN18296_c3_g1
OG0005241	NA	NA	NA	NA	NA	NA	NA	DW	NA	8	1	0	1	1	OG0005241	TRINITY_DN7104_c0_g1	TRINITY_DN17061_c4_g1	TRINITY_DN45236_c0_g1	TRINITY_DN21902_c6_g1	TRINITY_DN22482_c5_g1	TRINITY_DN16636_c7_g1	TRINITY_DN19648_c3_g3		TRINITY_DN19792_c6_g1
OG0005257	NA	NA	NA	NA	NA	NA	NA	DW	NA	8	1	0	1	1	OG0005257	TRINITY_DN717_c0_g2	TRINITY_DN15600_c0_g1	TRINITY_DN42849_c2_g3	TRINITY_DN20959_c0_g1	TRINITY_DN23662_c9_g1	TRINITY_DN14745_c6_g1	TRINITY_DN17832_c6_g1		TRINITY_DN21707_c4_g1
OG0005271	NA	NA	NA	NA	NA	NA	NA	DW	NA	8	1	0	1	1	OG0005271	TRINITY_DN726_c0_g2	TRINITY_DN18584_c2_g2	TRINITY_DN45570_c6_g1	TRINITY_DN24441_c5_g3	TRINITY_DN20605_c4_g1	TRINITY_DN12859_c10_g1	TRINITY_DN21252_c7_g3		TRINITY_DN22629_c12_g1
OG0005280	UP	NA	NA	NA	NA	NA	NA	NA	NA	8	0	1	1	1	OG0005280	TRINITY_DN7340_c0_g1	TRINITY_DN18878_c2_g1	TRINITY_DN46793_c1_g1	TRINITY_DN21682_c4_g1	TRINITY_DN19427_c13_g1	TRINITY_DN13484_c4_g1	TRINITY_DN18034_c6_g1	TRINITY_DN346_c2_g4	TRINITY_DN21690_c13_g1
OG0005299	NA	NA	DW	NA	NA	NA	NA	NA	NA	8	1	0	1	1	OG0005299	TRINITY_DN743_c14_g4	TRINITY_DN19804_c4_g1	TRINITY_DN43929_c10_g1	TRINITY_DN24623_c4_g1	TRINITY_DN22654_c6_g1	TRINITY_DN17512_c4_g3	TRINITY_DN20416_c6_g3	TRINITY_DN417_c2_g1	TRINITY_DN22019_c2_g1
OG0005301	NA	NA	UP	NA	NA	NA	NA	NA	NA	8	0	1	1	1	OG0005301	TRINITY_DN7452_c3_g1	TRINITY_DN20426_c0_g1	TRINITY_DN4044_c0_g1		TRINITY_DN20892_c0_g3	TRINITY_DN19990_c1_g1	TRINITY_DN17358_c0_g1	TRINITY_DN1185_c0_g1
OG0005313	NA	NA	UP	NA	NA	NA	NA	NA	NA	8	0	1	1	1	OG0005313	TRINITY_DN7501_c0_g4	TRINITY_DN16866_c4_g1	TRINITY_DN48136_c3_g2	TRINITY_DN22333_c9_g1	TRINITY_DN17560_c0_g1	TRINITY_DN20707_c9_g4	TRINITY_DN20882_c3_g11	TRINITY_DN4536_c0_g1	TRINITY_DN18696_c3_g3
OG0005315	DW	NA	NA	NA	NA	NA	NA	NA	NA	8	1	0	1	1	OG0005315	TRINITY_DN751_c1_g2	TRINITY_DN16117_c0_g1	TRINITY_DN46338_c0_g1	TRINITY_DN22030_c10_g1	TRINITY_DN19298_c3_g2	TRINITY_DN18180_c2_g1	TRINITY_DN16971_c0_g1	TRINITY_DN911_c1_g1	TRINITY_DN20418_c1_g2
OG0005316	NA	NA	NA	NA	UP	NA	NA	NA	NA	8	0	1	1	1	OG0005316	TRINITY_DN751_c4_g1	TRINITY_DN17621_c8_g7	TRINITY_DN46293_c0_g1	TRINITY_DN24294_c3_g6	TRINITY_DN21661_c1_g1	TRINITY_DN15975_c4_g1	TRINITY_DN20598_c3_g3	TRINITY_DN5527_c0_g2	TRINITY_DN35124_c0_g1
OG0005317	NA	NA	NA	NA	DW	NA	NA	NA	NA	8	1	0	1	1	OG0005317	TRINITY_DN752_c3_g1	TRINITY_DN18777_c2_g1	TRINITY_DN46620_c1_g1	TRINITY_DN24863_c10_g1	TRINITY_DN23507_c9_g1	TRINITY_DN16718_c11_g1	TRINITY_DN18097_c4_g2	TRINITY_DN2694_c0_g5	TRINITY_DN22758_c8_g1
OG0005318	NA	NA	NA	NA	NA	NA	NA	NA	UP	8	0	1	1	1	OG0005318	TRINITY_DN7534_c0_g2	TRINITY_DN16514_c5_g1	TRINITY_DN43593_c0_g1	TRINITY_DN21564_c9_g1	TRINITY_DN20924_c3_g1	TRINITY_DN16120_c10_g1	TRINITY_DN19260_c2_g1	TRINITY_DN619_c8_g3	TRINITY_DN21905_c6_g2
OG0005326	NA	NA	NA	NA	NA	NA	NA	UP	NA	8	0	1	1	1	OG0005326	TRINITY_DN759_c0_g2	TRINITY_DN19307_c4_g1	TRINITY_DN46296_c0_g1	TRINITY_DN24184_c4_g1	TRINITY_DN22254_c3_g1	TRINITY_DN18802_c2_g2	TRINITY_DN19545_c4_g1	TRINITY_DN3317_c0_g4	TRINITY_DN22847_c1_g4
OG0005330	NA	NA	DW	NA	NA	NA	NA	NA	NA	8	1	0	1	1	OG0005330	TRINITY_DN7620_c0_g2	TRINITY_DN18116_c1_g1	TRINITY_DN1410_c0_g1	TRINITY_DN1114_c0_g1	TRINITY_DN18181_c3_g1	TRINITY_DN34481_c0_g1		TRINITY_DN1131_c1_g1	TRINITY_DN22143_c4_g1
OG0005333	NA	NA	DW	NA	NA	NA	NA	NA	NA	8	1	0	1	1	OG0005333	TRINITY_DN765_c1_g2		TRINITY_DN40677_c0_g1	TRINITY_DN21945_c0_g1	TRINITY_DN23030_c10_g1	TRINITY_DN14491_c5_g1	TRINITY_DN17076_c0_g1	TRINITY_DN2556_c0_g1	TRINITY_DN20156_c9_g3
OG0005361	NA	NA	NA	NA	UP	NA	NA	NA	NA	8	0	1	1	1	OG0005361	TRINITY_DN7861_c0_g5	TRINITY_DN16642_c4_g1	TRINITY_DN41658_c5_g5	TRINITY_DN21678_c9_g6	TRINITY_DN19945_c8_g6	TRINITY_DN19030_c2_g1	TRINITY_DN18602_c9_g1	TRINITY_DN6442_c0_g2	TRINITY_DN22852_c10_g1
OG0005373	NA	NA	NA	NA	NA	NA	NA	DW	NA	8	1	0	1	1	OG0005373	TRINITY_DN791_c0_g1	TRINITY_DN16474_c0_g1	TRINITY_DN45058_c0_g1	TRINITY_DN23232_c4_g1	TRINITY_DN25126_c4_g1	TRINITY_DN13307_c10_g1	TRINITY_DN19586_c0_g1		TRINITY_DN19382_c7_g1
OG0005383	NA	NA	NA	NA	NA	NA	NA	DW	NA	8	1	0	1	1	OG0005383	TRINITY_DN799_c2_g1	TRINITY_DN19073_c6_g1	TRINITY_DN46977_c2_g1	TRINITY_DN21997_c5_g1		TRINITY_DN19277_c3_g2	TRINITY_DN19809_c3_g1		TRINITY_DN64528_c0_g1
OG0005392	NA	NA	UP	NA	NA	NA	NA	NA	NA	8	0	1	1	1	OG0005392	TRINITY_DN8044_c0_g2	TRINITY_DN17207_c8_g1	TRINITY_DN44719_c1_g1	TRINITY_DN22200_c5_g1		TRINITY_DN17068_c4_g1	TRINITY_DN20919_c3_g4	TRINITY_DN4373_c0_g2	TRINITY_DN18466_c5_g1
OG0005396	NA	NA	DW	NA	NA	NA	NA	NA	NA	8	1	0	1	1	OG0005396	TRINITY_DN8061_c0_g1	TRINITY_DN17738_c2_g1	TRINITY_DN47619_c4_g1	TRINITY_DN21516_c5_g2	TRINITY_DN22916_c7_g1	TRINITY_DN17535_c2_g2	TRINITY_DN18440_c3_g2	TRINITY_DN405_c2_g4	TRINITY_DN20877_c2_g1
OG0005398	NA	NA	NA	NA	NA	NA	NA	UP	NA	8	0	1	1	1	OG0005398	TRINITY_DN8086_c0_g1	TRINITY_DN17207_c7_g4	TRINITY_DN42437_c4_g1	TRINITY_DN22982_c14_g1	TRINITY_DN22377_c9_g1	TRINITY_DN13641_c0_g1	TRINITY_DN16775_c0_g1	TRINITY_DN3908_c1_g1	TRINITY_DN19378_c0_g2
OG0005399	NA	NA	DW	NA	NA	NA	NA	NA	NA	8	1	0	1	1	OG0005399	TRINITY_DN8087_c5_g1	TRINITY_DN18246_c7_g4	TRINITY_DN43717_c8_g5	TRINITY_DN22909_c4_g5		TRINITY_DN19711_c4_g1	TRINITY_DN20449_c4_g5	TRINITY_DN5120_c2_g1	TRINITY_DN20186_c4_g3
OG0005416	NA	NA	NA	NA	NA	NA	NA	UP	NA	8	0	1	1	1	OG0005416	TRINITY_DN8205_c0_g1	TRINITY_DN16083_c0_g1	TRINITY_DN42586_c0_g1	TRINITY_DN24889_c8_g1	TRINITY_DN24454_c5_g2	TRINITY_DN14559_c2_g1	TRINITY_DN16173_c0_g1	TRINITY_DN1771_c2_g2	TRINITY_DN23915_c11_g1
OG0005418	NA	NA	NA	NA	NA	NA	NA	UP	NA	8	0	1	1	1	OG0005418	TRINITY_DN8217_c4_g1	TRINITY_DN16380_c6_g6	TRINITY_DN41939_c0_g1	TRINITY_DN23603_c0_g1	TRINITY_DN24453_c6_g1	TRINITY_DN18620_c5_g2	TRINITY_DN16164_c0_g1	TRINITY_DN859_c9_g2	TRINITY_DN19109_c4_g2
OG0005420	NA	NA	DW	NA	NA	NA	NA	NA	NA	8	1	0	1	1	OG0005420	TRINITY_DN8227_c0_g1	TRINITY_DN17137_c2_g1	TRINITY_DN35992_c0_g1			TRINITY_DN20562_c5_g1	TRINITY_DN20336_c4_g4	TRINITY_DN392_c2_g1	TRINITY_DN22203_c1_g1
OG0005422	NA	NA	NA	NA	NA	NA	NA	UP	NA	8	0	1	1	1	OG0005422	TRINITY_DN822_c10_g3	TRINITY_DN19199_c5_g1	TRINITY_DN47821_c5_g1	TRINITY_DN23704_c9_g1	TRINITY_DN20591_c2_g1	TRINITY_DN19558_c14_g2	TRINITY_DN20046_c7_g1	TRINITY_DN1203_c0_g2	TRINITY_DN21949_c5_g1
OG0005423	NA	NA	NA	DW	NA	NA	NA	NA	NA	8	1	0	1	1	OG0005423	TRINITY_DN8235_c2_g1	TRINITY_DN17528_c6_g1	TRINITY_DN42380_c0_g2	TRINITY_DN21239_c0_g1	TRINITY_DN20526_c1_g2	TRINITY_DN15274_c8_g2	TRINITY_DN20161_c4_g1	TRINITY_DN3_c0_g1	TRINITY_DN20191_c1_g1
OG0005424	NA	NA	NA	NA	NA	NA	NA	UP	NA	8	0	1	1	1	OG0005424	TRINITY_DN8239_c1_g1	TRINITY_DN18494_c0_g1	TRINITY_DN43541_c0_g1	TRINITY_DN16173_c0_g1	TRINITY_DN21579_c1_g5	TRINITY_DN12413_c9_g2	TRINITY_DN16934_c0_g1	TRINITY_DN1970_c0_g2	TRINITY_DN21734_c2_g1
OG0005426	NA	NA	NA	NA	NA	NA	NA	UP	NA	8	0	1	1	1	OG0005426	TRINITY_DN8240_c4_g1	TRINITY_DN16159_c6_g5	TRINITY_DN76021_c0_g1	TRINITY_DN29887_c0_g1	TRINITY_DN18626_c10_g1	TRINITY_DN13664_c8_g1	TRINITY_DN11917_c0_g1	TRINITY_DN6993_c1_g1
OG0005428	NA	NA	UP	NA	NA	NA	NA	NA	NA	8	0	1	1	1	OG0005428	TRINITY_DN8267_c0_g3	TRINITY_DN19786_c1_g1	TRINITY_DN47995_c1_g1	TRINITY_DN24749_c1_g1	TRINITY_DN22035_c6_g1	TRINITY_DN13091_c2_g4	TRINITY_DN19353_c3_g1	TRINITY_DN4771_c0_g1	TRINITY_DN21818_c8_g2
OG0005434	NA	NA	DW	NA	NA	NA	NA	NA	NA	8	1	0	1	1	OG0005434	TRINITY_DN8349_c0_g1	TRINITY_DN18627_c2_g1	TRINITY_DN38607_c0_g2	TRINITY_DN24524_c8_g1	TRINITY_DN18368_c7_g1	TRINITY_DN15118_c2_g1	TRINITY_DN18035_c5_g1	TRINITY_DN6177_c0_g1	TRINITY_DN20262_c6_g1
OG0005438	NA	NA	NA	DW	NA	NA	NA	NA	NA	8	1	0	1	1	OG0005438	TRINITY_DN835_c0_g3	TRINITY_DN18662_c3_g2	TRINITY_DN47397_c0_g1	TRINITY_DN22080_c6_g2	TRINITY_DN18606_c11_g2	TRINITY_DN14580_c3_g2	TRINITY_DN18978_c3_g1	TRINITY_DN348_c1_g1	TRINITY_DN21179_c3_g1
OG0005442	NA	NA	DW	NA	NA	NA	NA	NA	NA	8	1	0	1	1	OG0005442	TRINITY_DN8386_c2_g1	TRINITY_DN16443_c9_g9	TRINITY_DN45355_c8_g1	TRINITY_DN24343_c8_g2	TRINITY_DN21938_c5_g1	TRINITY_DN16722_c4_g1	TRINITY_DN19241_c3_g1	TRINITY_DN10923_c0_g3	TRINITY_DN19914_c2_g1
OG0005454	NA	NA	NA	NA	NA	NA	NA	DW	NA	8	1	0	1	1	OG0005454	TRINITY_DN842_c0_g2	TRINITY_DN17748_c2_g1	TRINITY_DN48594_c0_g1	TRINITY_DN22922_c7_g1	TRINITY_DN19588_c8_g3	TRINITY_DN19398_c8_g1	TRINITY_DN18686_c7_g1		TRINITY_DN22110_c3_g4
OG0005470	NA	NA	NA	NA	NA	NA	NA	UP	NA	8	0	1	1	1	OG0005470	TRINITY_DN8556_c0_g1	TRINITY_DN16403_c9_g1	TRINITY_DN40307_c0_g1	TRINITY_DN23425_c2_g1	TRINITY_DN24392_c1_g1	TRINITY_DN14770_c6_g1	TRINITY_DN20255_c9_g2	TRINITY_DN2320_c7_g2	TRINITY_DN19740_c6_g2
OG0005472	NA	NA	NA	NA	UP	NA	NA	NA	NA	8	0	1	1	1	OG0005472	TRINITY_DN8568_c2_g1	TRINITY_DN16427_c3_g1	TRINITY_DN47330_c5_g3	TRINITY_DN23205_c13_g1	TRINITY_DN23097_c3_g3	TRINITY_DN18210_c4_g2	TRINITY_DN19263_c1_g1	TRINITY_DN13293_c0_g1	TRINITY_DN18228_c4_g2
OG0005477	NA	NA	DW	NA	NA	NA	NA	NA	NA	8	1	0	1	1	OG0005477	TRINITY_DN8589_c10_g1	TRINITY_DN19476_c2_g2	TRINITY_DN11378_c0_g1	TRINITY_DN28897_c0_g1		TRINITY_DN17262_c1_g1		TRINITY_DN29508_c0_g1	TRINITY_DN62601_c0_g1
OG0005482	NA	NA	NA	NA	NA	NA	NA	NA	DW	8	1	0	1	1	OG0005482	TRINITY_DN8638_c0_g1	TRINITY_DN17789_c6_g1	TRINITY_DN44724_c10_g1	TRINITY_DN20875_c0_g2	TRINITY_DN20604_c7_g1	TRINITY_DN16677_c10_g1	TRINITY_DN18986_c9_g3	TRINITY_DN571_c0_g1	TRINITY_DN18227_c10_g3
OG0005495	NA	NA	DW	NA	NA	NA	NA	NA	NA	8	1	0	1	1	OG0005495	TRINITY_DN8728_c0_g1	TRINITY_DN17710_c10_g1	TRINITY_DN45885_c0_g1	TRINITY_DN22702_c4_g1	TRINITY_DN20928_c1_g2	TRINITY_DN15837_c2_g1	TRINITY_DN18014_c9_g1	TRINITY_DN687_c1_g1	TRINITY_DN18390_c5_g1
OG0005496	NA	NA	NA	NA	NA	NA	NA	UP	NA	8	0	1	1	1	OG0005496	TRINITY_DN8737_c0_g1	TRINITY_DN15556_c0_g1	TRINITY_DN45862_c0_g1	TRINITY_DN20550_c0_g1	TRINITY_DN24524_c1_g1	TRINITY_DN15549_c7_g1	TRINITY_DN16963_c0_g1	TRINITY_DN1904_c0_g1	TRINITY_DN19933_c9_g1
OG0005497	NA	NA	UP	NA	NA	NA	NA	NA	NA	8	0	1	1	1	OG0005497	TRINITY_DN8739_c0_g2	TRINITY_DN19468_c6_g7	TRINITY_DN40569_c0_g1	TRINITY_DN21186_c0_g1	TRINITY_DN19194_c3_g1	TRINITY_DN20997_c11_g1	TRINITY_DN18370_c8_g3	TRINITY_DN93_c0_g1	TRINITY_DN19077_c0_g2
OG0005504	NA	NA	NA	NA	NA	NA	NA	DW	NA	8	1	0	1	1	OG0005504	TRINITY_DN8817_c0_g1	TRINITY_DN15724_c0_g2	TRINITY_DN46933_c1_g1	TRINITY_DN24111_c2_g1	TRINITY_DN16726_c0_g1	TRINITY_DN13533_c4_g1	TRINITY_DN973_c0_g1		TRINITY_DN20188_c3_g1
OG0005507	UP	NA	NA	NA	NA	NA	NA	NA	NA	8	0	1	1	1	OG0005507	TRINITY_DN882_c5_g2	TRINITY_DN16526_c0_g1	TRINITY_DN44181_c0_g1	TRINITY_DN24389_c13_g1	TRINITY_DN24409_c4_g1	TRINITY_DN20963_c0_g1	TRINITY_DN19610_c3_g2	TRINITY_DN1210_c0_g2	TRINITY_DN23297_c0_g1
OG0005520	NA	NA	NA	NA	NA	NA	NA	DW	NA	8	1	0	1	1	OG0005520	TRINITY_DN8976_c0_g2	TRINITY_DN19493_c4_g1	TRINITY_DN48207_c0_g1	TRINITY_DN22103_c0_g2	TRINITY_DN22908_c2_g1	TRINITY_DN16634_c6_g1	TRINITY_DN6375_c0_g2		TRINITY_DN23170_c2_g1
OG0005522	NA	NA	DW	NA	NA	NA	NA	NA	NA	8	1	0	1	1	OG0005522	TRINITY_DN898_c2_g1	TRINITY_DN19289_c3_g3	TRINITY_DN48331_c1_g3	TRINITY_DN23738_c12_g1	TRINITY_DN24579_c1_g1	TRINITY_DN16629_c9_g1	TRINITY_DN20504_c4_g1	TRINITY_DN2939_c3_g1	TRINITY_DN22579_c2_g1
OG0005556	NA	NA	DW	NA	NA	NA	NA	NA	NA	8	1	0	1	1	OG0005556	TRINITY_DN9218_c0_g2	TRINITY_DN17171_c0_g2	TRINITY_DN42057_c0_g1	TRINITY_DN24214_c7_g3	TRINITY_DN18846_c4_g1	TRINITY_DN18230_c4_g3	TRINITY_DN19733_c9_g1	TRINITY_DN4268_c1_g4	TRINITY_DN21113_c5_g1
OG0005560	NA	NA	NA	NA	NA	NA	NA	UP	NA	8	0	1	1	1	OG0005560	TRINITY_DN9258_c1_g1	TRINITY_DN17863_c7_g1	TRINITY_DN46956_c6_g1	TRINITY_DN24387_c3_g2	TRINITY_DN22303_c10_g1	TRINITY_DN19394_c4_g2	TRINITY_DN20860_c6_g1	TRINITY_DN8022_c0_g2	TRINITY_DN22910_c3_g8
OG0005563	NA	NA	NA	NA	NA	NA	NA	UP	NA	8	0	1	1	1	OG0005563	TRINITY_DN9295_c0_g1	TRINITY_DN15867_c0_g1	TRINITY_DN47859_c0_g1	TRINITY_DN22243_c5_g1	TRINITY_DN18248_c7_g2	TRINITY_DN12923_c0_g1	TRINITY_DN17601_c5_g2	TRINITY_DN338_c2_g2	TRINITY_DN19332_c8_g3
OG0005564	NA	NA	DW	NA	NA	NA	NA	NA	NA	8	1	0	1	1	OG0005564	TRINITY_DN92_c0_g1	TRINITY_DN19801_c7_g1	TRINITY_DN48259_c4_g2	TRINITY_DN23686_c11_g3	TRINITY_DN24785_c5_g1	TRINITY_DN19958_c8_g1	TRINITY_DN20788_c1_g1	TRINITY_DN1506_c0_g1	TRINITY_DN21683_c5_g2
OG0005565	NA	NA	NA	NA	UP	NA	NA	NA	NA	8	0	1	1	1	OG0005565	TRINITY_DN92_c17_g1	TRINITY_DN17758_c0_g2	TRINITY_DN47573_c4_g1	TRINITY_DN24376_c2_g2	TRINITY_DN22926_c5_g1	TRINITY_DN16553_c1_g1	TRINITY_DN17213_c0_g1	TRINITY_DN5865_c0_g1	TRINITY_DN51532_c0_g1
OG0005566	NA	NA	NA	NA	UP	NA	NA	NA	NA	8	0	1	1	1	OG0005566	TRINITY_DN9302_c0_g1	TRINITY_DN13400_c0_g1	TRINITY_DN44668_c3_g1	TRINITY_DN21027_c0_g1	TRINITY_DN22843_c4_g1	TRINITY_DN18993_c1_g1	TRINITY_DN17466_c2_g1	TRINITY_DN859_c4_g1	TRINITY_DN23390_c10_g2
OG0005577	NA	NA	NA	NA	NA	NA	NA	UP	NA	8	0	1	1	1	OG0005577	TRINITY_DN941_c1_g2	TRINITY_DN16352_c10_g1	TRINITY_DN45649_c0_g1	TRINITY_DN23343_c3_g3	TRINITY_DN21424_c4_g1	TRINITY_DN17334_c5_g1	TRINITY_DN18248_c7_g6	TRINITY_DN364_c2_g2	TRINITY_DN19860_c4_g3
OG0005579	NA	NA	NA	NA	NA	NA	NA	UP	NA	8	0	1	1	1	OG0005579	TRINITY_DN9422_c0_g1	TRINITY_DN3991_c0_g1	TRINITY_DN38663_c0_g2	TRINITY_DN24425_c6_g1	TRINITY_DN29433_c0_g1	TRINITY_DN20473_c2_g1	TRINITY_DN18599_c11_g1	TRINITY_DN3686_c0_g1	TRINITY_DN44123_c0_g1
OG0005593	NA	NA	DW	NA	NA	NA	NA	NA	NA	8	1	0	1	1	OG0005593	TRINITY_DN9527_c0_g2	TRINITY_DN16674_c6_g4	TRINITY_DN46440_c4_g6	TRINITY_DN22197_c8_g1	TRINITY_DN24851_c6_g1	TRINITY_DN12487_c5_g4	TRINITY_DN21210_c8_g4	TRINITY_DN4726_c0_g1	TRINITY_DN18974_c10_g2
OG0005596	NA	NA	NA	NA	NA	NA	NA	DW	NA	8	1	0	1	1	OG0005596	TRINITY_DN9531_c0_g2	TRINITY_DN17070_c3_g2	TRINITY_DN43741_c0_g1	TRINITY_DN20675_c0_g1	TRINITY_DN21112_c6_g2	TRINITY_DN16996_c0_g2	TRINITY_DN18673_c0_g1	TRINITY_DN1463_c5_g1	TRINITY_DN20212_c6_g2
OG0005604	NA	DW	NA	NA	NA	NA	NA	NA	NA	8	1	0	1	1	OG0005604	TRINITY_DN9655_c0_g1	TRINITY_DN17108_c1_g1	TRINITY_DN43378_c0_g1	TRINITY_DN13733_c0_g1	TRINITY_DN17413_c0_g1	TRINITY_DN16250_c7_g4	TRINITY_DN17067_c0_g1	TRINITY_DN2168_c3_g1	TRINITY_DN22219_c3_g2
OG0005607	NA	NA	UP	NA	NA	NA	NA	NA	NA	8	0	1	1	1	OG0005607	TRINITY_DN9672_c0_g1	TRINITY_DN18519_c1_g2	TRINITY_DN42374_c1_g1	TRINITY_DN23673_c7_g3	TRINITY_DN24325_c5_g1	TRINITY_DN15387_c3_g1	TRINITY_DN18679_c4_g5	TRINITY_DN1885_c2_g2	TRINITY_DN21297_c3_g2
OG0005612	NA	NA	NA	NA	NA	NA	NA	NA	UP	8	0	1	1	1	OG0005612	TRINITY_DN9711_c0_g2	TRINITY_DN17450_c4_g1	TRINITY_DN45029_c5_g2	TRINITY_DN24231_c2_g1	TRINITY_DN19606_c0_g1	TRINITY_DN18293_c7_g1	TRINITY_DN20678_c8_g2	TRINITY_DN3337_c1_g1	TRINITY_DN23434_c8_g1
OG0005618	NA	NA	UP	NA	NA	NA	NA	NA	NA	8	0	1	1	1	OG0005618	TRINITY_DN9747_c2_g1	TRINITY_DN15896_c0_g1	TRINITY_DN47764_c0_g3	TRINITY_DN24178_c4_g1	TRINITY_DN22342_c7_g1	TRINITY_DN20089_c2_g1	TRINITY_DN19849_c0_g1	TRINITY_DN3282_c1_g1	TRINITY_DN23569_c2_g1
OG0005620	NA	NA	UP	NA	NA	NA	NA	NA	NA	8	0	1	1	1	OG0005620	TRINITY_DN975_c0_g1	TRINITY_DN19523_c6_g3	TRINITY_DN45364_c1_g1	TRINITY_DN24112_c4_g1	TRINITY_DN19071_c8_g1		TRINITY_DN16951_c0_g2	TRINITY_DN10149_c1_g2	TRINITY_DN23853_c1_g3
OG0005632	NA	NA	DW	NA	NA	NA	NA	NA	NA	8	1	0	1	1	OG0005632	TRINITY_DN9801_c0_g1	TRINITY_DN19222_c5_g2	TRINITY_DN41581_c0_g1	TRINITY_DN23672_c0_g2	TRINITY_DN18512_c6_g1	TRINITY_DN15492_c5_g1	TRINITY_DN17400_c0_g1	TRINITY_DN1899_c2_g1	TRINITY_DN20825_c2_g1
OG0005641	NA	NA	UP	NA	NA	NA	NA	NA	NA	8	0	1	1	1	OG0005641	TRINITY_DN9882_c0_g1	TRINITY_DN19045_c6_g1	TRINITY_DN44964_c4_g4	TRINITY_DN21608_c3_g1	TRINITY_DN20550_c1_g1	TRINITY_DN14712_c3_g1	TRINITY_DN17597_c7_g1	TRINITY_DN1934_c0_g4	TRINITY_DN20251_c2_g6
OG0005648	UP	NA	NA	NA	NA	NA	NA	NA	NA	8	0	1	1	1	OG0005648	TRINITY_DN994_c0_g2	TRINITY_DN26661_c0_g1	TRINITY_DN46336_c1_g1	TRINITY_DN24504_c3_g1	TRINITY_DN25237_c4_g1		TRINITY_DN17629_c8_g1	TRINITY_DN249_c1_g2	TRINITY_DN20960_c12_g1
OG0005650	DW	NA	NA	NA	NA	NA	NA	NA	NA	8	1	0	1	1	OG0005650	TRINITY_DN9970_c0_g2	TRINITY_DN16234_c9_g3	TRINITY_DN43481_c3_g1	TRINITY_DN20404_c0_g2	TRINITY_DN20945_c4_g1	TRINITY_DN20212_c10_g1	TRINITY_DN21040_c5_g2	TRINITY_DN210_c2_g3	TRINITY_DN19306_c5_g1
OG0005678	NA	NA	NA	NA	NA	NA	NA	DW	NA	8	1	0	1	1	OG0005678		TRINITY_DN16058_c0_g2	TRINITY_DN22587_c0_g1	TRINITY_DN10463_c0_g1	TRINITY_DN16246_c0_g1	TRINITY_DN8486_c0_g3	TRINITY_DN24636_c0_g1		TRINITY_DN51732_c0_g1
OG0005679	NA	NA	DW	NA	NA	NA	NA	NA	NA	8	1	0	1	1	OG0005679		TRINITY_DN16180_c0_g2	TRINITY_DN81071_c0_g1	TRINITY_DN29354_c0_g1	TRINITY_DN19761_c6_g1	TRINITY_DN15954_c4_g2	TRINITY_DN33453_c0_g1	TRINITY_DN67842_c0_g1	TRINITY_DN21369_c6_g5
OG0005682	NA	NA	DW	NA	NA	NA	NA	NA	NA	8	1	0	1	1	OG0005682		TRINITY_DN16313_c0_g1	TRINITY_DN44621_c9_g3	TRINITY_DN22758_c10_g1	TRINITY_DN24735_c3_g2	TRINITY_DN14655_c0_g1	TRINITY_DN20177_c6_g1	TRINITY_DN1757_c1_g2	TRINITY_DN6268_c0_g1
OG0005691	NA	NA	NA	NA	NA	NA	NA	DW	NA	8	1	0	1	1	OG0005691		TRINITY_DN16801_c7_g6	TRINITY_DN38934_c0_g1	TRINITY_DN19122_c0_g1	TRINITY_DN16636_c0_g1	TRINITY_DN15014_c6_g2	TRINITY_DN15597_c0_g1		TRINITY_DN23037_c2_g2
OG0005695	NA	NA	NA	NA	NA	NA	NA	DW	NA	8	1	0	1	1	OG0005695		TRINITY_DN16989_c2_g1	TRINITY_DN46953_c2_g1	TRINITY_DN23379_c8_g1	TRINITY_DN25216_c8_g2	TRINITY_DN19113_c2_g4	TRINITY_DN20951_c5_g3		TRINITY_DN23877_c4_g1
OG0005704	NA	NA	NA	NA	NA	NA	NA	NA	UP	8	0	1	1	1	OG0005704		TRINITY_DN17646_c4_g4	TRINITY_DN41559_c5_g2	TRINITY_DN23506_c7_g1	TRINITY_DN21057_c10_g2	TRINITY_DN16420_c2_g2	TRINITY_DN17809_c6_g1	TRINITY_DN8790_c0_g2	TRINITY_DN21044_c6_g8
OG0005709	NA	NA	NA	NA	NA	NA	NA	NA	UP	8	0	1	1	1	OG0005709		TRINITY_DN17920_c6_g1	TRINITY_DN45019_c6_g1	TRINITY_DN22038_c5_g1	TRINITY_DN19632_c2_g1	TRINITY_DN18033_c4_g1	TRINITY_DN20330_c10_g2	TRINITY_DN41227_c0_g1	TRINITY_DN19129_c0_g1
OG0005728	NA	NA	NA	NA	NA	NA	NA	DW	NA	8	1	0	1	1	OG0005728		TRINITY_DN19216_c2_g2	TRINITY_DN42581_c1_g3	TRINITY_DN24276_c7_g2	TRINITY_DN21087_c1_g1	TRINITY_DN12598_c5_g1	TRINITY_DN20401_c6_g4		TRINITY_DN21951_c5_g1
OG0005729	NA	NA	UP	NA	NA	NA	NA	NA	NA	8	0	1	1	1	OG0005729		TRINITY_DN19222_c4_g1	TRINITY_DN42071_c2_g1	TRINITY_DN23232_c5_g1	TRINITY_DN23449_c7_g1	TRINITY_DN17691_c12_g2	TRINITY_DN20362_c11_g1	TRINITY_DN5633_c0_g1	TRINITY_DN20345_c10_g1
OG0005738	NA	NA	NA	NA	NA	NA	NA	DW	NA	8	1	0	1	1	OG0005738		TRINITY_DN19683_c11_g4	TRINITY_DN45706_c5_g1	TRINITY_DN23522_c9_g2	TRINITY_DN22580_c2_g3	TRINITY_DN17348_c6_g1	TRINITY_DN19970_c8_g1		TRINITY_DN20668_c3_g1
OG0005747	NA	NA	UP	NA	NA	NA	NA	NA	NA	8	0	1	1	1	OG0005747		TRINITY_DN6668_c0_g1	TRINITY_DN56751_c0_g1	TRINITY_DN42186_c0_g1		TRINITY_DN21463_c0_g1	TRINITY_DN11974_c0_g1	TRINITY_DN14935_c0_g1	TRINITY_DN22119_c3_g3
OG0005749	NA	NA	NA	NA	DW	NA	NA	NA	NA	8	1	0	1	1	OG0005749		TRINITY_DN36913_c0_g1	TRINITY_DN20857_c0_g1	TRINITY_DN24055_c4_g1	TRINITY_DN16393_c0_g2	TRINITY_DN12966_c1_g4	TRINITY_DN12720_c0_g1	TRINITY_DN299_c4_g1	TRINITY_DN16299_c0_g1
OG0005752	NA	NA	NA	NA	NA	NA	NA	DW	NA	8	1	0	1	1	OG0005752		TRINITY_DN4050_c0_g2	TRINITY_DN95663_c0_g1	TRINITY_DN49755_c0_g1	TRINITY_DN29784_c0_g1	TRINITY_DN32331_c0_g1	TRINITY_DN27565_c0_g1		TRINITY_DN17458_c0_g1
OG0005753	NA	NA	NA	NA	NA	NA	NA	DW	NA	8	1	0	1	1	OG0005753		TRINITY_DN43796_c0_g1	TRINITY_DN95068_c0_g1	TRINITY_DN30474_c0_g1	TRINITY_DN2881_c0_g1	TRINITY_DN15140_c4_g1	TRINITY_DN11275_c0_g1		TRINITY_DN22899_c6_g1
OG0005756	NA	NA	UP	NA	NA	NA	NA	NA	NA	8	0	1	1	1	OG0005756		TRINITY_DN44270_c0_g1	TRINITY_DN45013_c6_g1	TRINITY_DN23999_c2_g2		TRINITY_DN14054_c3_g3	TRINITY_DN11967_c0_g2	TRINITY_DN16418_c2_g2	TRINITY_DN14253_c0_g1
OG0005757	NA	NA	NA	NA	NA	NA	DW	NA	NA	8	1	0	1	1	OG0005757		TRINITY_DN44470_c0_g1	TRINITY_DN2695_c0_g1	TRINITY_DN30101_c0_g1	TRINITY_DN7965_c0_g1	TRINITY_DN16849_c7_g1	TRINITY_DN18713_c8_g1	TRINITY_DN43719_c0_g2	TRINITY_DN23810_c1_g1
OG0005777	NA	NA	NA	NA	NA	NA	NA	DW	NA	8	1	0	1	1	OG0005777	TRINITY_DN1006_c0_g2	TRINITY_DN18258_c1_g1	TRINITY_DN48798_c0_g1	TRINITY_DN23801_c5_g4	TRINITY_DN24370_c7_g2	TRINITY_DN18847_c3_g1	TRINITY_DN20642_c0_g2		TRINITY_DN23366_c5_g1
OG0005780	NA	NA	NA	NA	NA	NA	NA	DW	NA	8	1	0	1	1	OG0005780	TRINITY_DN10145_c0_g1	TRINITY_DN16261_c0_g1	TRINITY_DN47531_c0_g1	TRINITY_DN21683_c0_g1	TRINITY_DN25354_c5_g1	TRINITY_DN20042_c0_g1	TRINITY_DN17444_c0_g1		TRINITY_DN20033_c11_g1
OG0005784	NA	NA	NA	NA	NA	NA	NA	DW	NA	8	1	0	1	1	OG0005784	TRINITY_DN1017_c7_g1	TRINITY_DN18126_c1_g1	TRINITY_DN41655_c0_g1	TRINITY_DN22216_c0_g1	TRINITY_DN20540_c1_g2	TRINITY_DN14019_c7_g1	TRINITY_DN17927_c7_g1		TRINITY_DN58300_c0_g1
OG0005790	UP	NA	NA	NA	NA	NA	NA	NA	NA	8	0	1	1	1	OG0005790	TRINITY_DN10237_c1_g1	TRINITY_DN16975_c4_g4	TRINITY_DN43380_c0_g1		TRINITY_DN19326_c11_g1	TRINITY_DN14863_c4_g11	TRINITY_DN20974_c4_g7	TRINITY_DN2917_c1_g3	TRINITY_DN22512_c2_g5
OG0005802	NA	NA	NA	NA	NA	NA	NA	UP	NA	8	0	1	1	1	OG0005802	TRINITY_DN10445_c0_g1	TRINITY_DN17153_c2_g1	TRINITY_DN43367_c0_g1	TRINITY_DN23310_c9_g1	TRINITY_DN22308_c6_g1		TRINITY_DN17096_c0_g1	TRINITY_DN2330_c2_g1	TRINITY_DN21747_c3_g4
OG0005803	NA	NA	NA	NA	NA	NA	NA	DW	NA	8	1	0	1	1	OG0005803	TRINITY_DN10472_c5_g1	TRINITY_DN18907_c2_g1	TRINITY_DN41503_c0_g1	TRINITY_DN21735_c7_g3	TRINITY_DN19912_c0_g2	TRINITY_DN18618_c6_g1	TRINITY_DN20002_c5_g1		TRINITY_DN18223_c1_g1
OG0005809	NA	NA	NA	NA	NA	NA	NA	DW	NA	8	1	0	1	1	OG0005809	TRINITY_DN10583_c4_g2	TRINITY_DN15532_c0_g1	TRINITY_DN42882_c8_g1	TRINITY_DN461_c0_g1	TRINITY_DN22924_c5_g1		TRINITY_DN11549_c0_g1		TRINITY_DN23826_c2_g1
OG0005814	NA	NA	NA	NA	NA	NA	NA	DW	NA	8	1	0	1	1	OG0005814	TRINITY_DN1061_c0_g2	TRINITY_DN17681_c2_g1	TRINITY_DN46581_c1_g1	TRINITY_DN21444_c0_g1	TRINITY_DN21228_c5_g1	TRINITY_DN17813_c5_g1	TRINITY_DN17475_c0_g1		TRINITY_DN23655_c4_g1
OG0005818	NA	NA	NA	NA	NA	NA	NA	DW	NA	8	1	0	1	1	OG0005818	TRINITY_DN10701_c0_g1	TRINITY_DN11204_c0_g1	TRINITY_DN38175_c0_g1	TRINITY_DN24530_c0_g2	TRINITY_DN21121_c8_g1	TRINITY_DN16008_c6_g1	TRINITY_DN20175_c0_g2		TRINITY_DN30556_c0_g1
OG0005823	NA	NA	NA	NA	NA	NA	NA	DW	NA	8	1	0	1	1	OG0005823	TRINITY_DN108_c10_g2	TRINITY_DN19124_c8_g1	TRINITY_DN48196_c1_g2	TRINITY_DN24181_c5_g1	TRINITY_DN22619_c3_g1	TRINITY_DN16729_c7_g1	TRINITY_DN20046_c8_g5		TRINITY_DN20404_c6_g1
OG0005827	NA	NA	UP	NA	NA	NA	NA	NA	NA	8	0	1	1	1	OG0005827	TRINITY_DN10959_c0_g2	TRINITY_DN36326_c0_g1	TRINITY_DN31443_c0_g1	TRINITY_DN21569_c13_g3	TRINITY_DN18397_c6_g2	TRINITY_DN21694_c0_g1		TRINITY_DN6734_c5_g1	TRINITY_DN45983_c0_g1
OG0005828	NA	NA	NA	NA	NA	NA	NA	DW	NA	8	1	0	1	1	OG0005828	TRINITY_DN10986_c0_g1	TRINITY_DN19712_c4_g1	TRINITY_DN19945_c0_g1	TRINITY_DN19242_c0_g2	TRINITY_DN27642_c0_g1	TRINITY_DN12984_c12_g1	TRINITY_DN14284_c0_g1
OG0005829	NA	NA	NA	NA	NA	NA	NA	DW	NA	8	1	0	1	1	OG0005829	TRINITY_DN10996_c0_g1	TRINITY_DN17344_c10_g1	TRINITY_DN45748_c0_g1	TRINITY_DN24255_c12_g1	TRINITY_DN22019_c9_g1	TRINITY_DN21139_c6_g1	TRINITY_DN20468_c3_g3		TRINITY_DN21362_c1_g2
OG0005835	NA	NA	DW	NA	NA	NA	NA	NA	NA	8	1	0	1	1	OG0005835	TRINITY_DN1115_c0_g1	TRINITY_DN17825_c4_g3	TRINITY_DN47674_c0_g1	TRINITY_DN21570_c3_g4	TRINITY_DN18581_c5_g1	TRINITY_DN16877_c3_g1	TRINITY_DN17865_c2_g2	TRINITY_DN3226_c0_g2
OG0005841	DW	NA	NA	NA	NA	NA	NA	NA	NA	8	1	0	1	1	OG0005841	TRINITY_DN1122_c11_g1	TRINITY_DN17129_c6_g2	TRINITY_DN44862_c0_g1		TRINITY_DN21853_c6_g1	TRINITY_DN16101_c1_g1	TRINITY_DN19344_c11_g1	TRINITY_DN2989_c0_g1	TRINITY_DN19325_c1_g1
OG0005843	NA	NA	NA	NA	NA	NA	NA	UP	NA	8	0	1	1	1	OG0005843	TRINITY_DN1122_c7_g1		TRINITY_DN41727_c6_g1	TRINITY_DN23796_c5_g2	TRINITY_DN18904_c0_g1		TRINITY_DN18167_c13_g1	TRINITY_DN2989_c0_g2	TRINITY_DN23067_c9_g1
OG0005845	NA	NA	NA	NA	NA	NA	NA	DW	NA	8	1	0	1	1	OG0005845	TRINITY_DN1125_c8_g1	TRINITY_DN17340_c3_g6	TRINITY_DN45552_c1_g1	TRINITY_DN22224_c0_g2	TRINITY_DN21411_c3_g2	TRINITY_DN16502_c4_g2	TRINITY_DN17860_c0_g1		TRINITY_DN19302_c8_g3
OG0005847	NA	NA	NA	NA	NA	NA	NA	DW	NA	8	1	0	1	1	OG0005847	TRINITY_DN11292_c0_g2	TRINITY_DN18959_c0_g1	TRINITY_DN42646_c0_g1	TRINITY_DN22282_c7_g2	TRINITY_DN23944_c11_g1	TRINITY_DN16440_c6_g1	TRINITY_DN18739_c2_g1		TRINITY_DN20891_c10_g1
OG0005848	NA	NA	NA	NA	NA	NA	NA	DW	NA	8	1	0	1	1	OG0005848	TRINITY_DN1129_c2_g2	TRINITY_DN18634_c3_g1	TRINITY_DN35111_c0_g1	TRINITY_DN22726_c3_g5	TRINITY_DN20288_c3_g1	TRINITY_DN12895_c8_g1	TRINITY_DN19861_c8_g1		TRINITY_DN23167_c3_g1
OG0005850	NA	NA	NA	NA	NA	NA	NA	DW	NA	8	1	0	1	1	OG0005850	TRINITY_DN1132_c3_g1	TRINITY_DN17580_c3_g2	TRINITY_DN39052_c0_g1	TRINITY_DN20153_c0_g1	TRINITY_DN17160_c0_g1	TRINITY_DN17231_c7_g1	TRINITY_DN11890_c0_g1		TRINITY_DN23700_c1_g1
OG0005863	NA	NA	NA	NA	NA	NA	NA	DW	NA	8	1	0	1	1	OG0005863	TRINITY_DN1162_c0_g1	TRINITY_DN17057_c2_g1	TRINITY_DN47363_c3_g1	TRINITY_DN21893_c9_g1	TRINITY_DN23768_c4_g1	TRINITY_DN14884_c9_g1	TRINITY_DN17688_c7_g1		TRINITY_DN19017_c7_g4
OG0005868	NA	NA	NA	NA	NA	NA	NA	DW	NA	8	1	0	1	1	OG0005868	TRINITY_DN1176_c4_g2	TRINITY_DN18364_c7_g1	TRINITY_DN46278_c3_g1	TRINITY_DN24582_c1_g1	TRINITY_DN22458_c5_g1	TRINITY_DN12407_c4_g2	TRINITY_DN21297_c3_g5		TRINITY_DN23342_c5_g1
OG0005874	NA	NA	DW	NA	NA	NA	NA	NA	NA	8	1	0	1	1	OG0005874	TRINITY_DN11891_c2_g1	TRINITY_DN16823_c5_g1	TRINITY_DN42137_c8_g1	TRINITY_DN23340_c6_g1	TRINITY_DN19054_c5_g1	TRINITY_DN19311_c8_g3	TRINITY_DN16448_c0_g1	TRINITY_DN827_c1_g1
OG0005875	NA	NA	UP	NA	NA	NA	NA	NA	NA	8	0	1	1	1	OG0005875	TRINITY_DN1189_c0_g1	TRINITY_DN17136_c5_g1	TRINITY_DN45487_c0_g1		TRINITY_DN22829_c6_g1	TRINITY_DN17644_c0_g2	TRINITY_DN19637_c1_g3	TRINITY_DN3325_c0_g1	TRINITY_DN20945_c0_g1
OG0005878	NA	NA	NA	NA	NA	NA	NA	UP	NA	8	0	1	1	1	OG0005878	TRINITY_DN1192_c0_g2	TRINITY_DN29605_c0_g1	TRINITY_DN40776_c0_g1	TRINITY_DN22079_c12_g1	TRINITY_DN22912_c3_g1		TRINITY_DN16371_c0_g1	TRINITY_DN5857_c0_g1	TRINITY_DN34305_c0_g1
OG0005882	NA	NA	NA	NA	NA	NA	NA	DW	NA	8	1	0	1	1	OG0005882	TRINITY_DN11_c20_g2	TRINITY_DN16996_c7_g1	TRINITY_DN47865_c0_g2	TRINITY_DN23022_c3_g1	TRINITY_DN22644_c6_g8	TRINITY_DN17241_c6_g1	TRINITY_DN21039_c7_g1		TRINITY_DN19141_c5_g1
OG0005883	NA	NA	NA	NA	NA	NA	NA	DW	NA	8	1	0	1	1	OG0005883	TRINITY_DN12000_c1_g1	TRINITY_DN16940_c6_g3	TRINITY_DN45612_c4_g1	TRINITY_DN23968_c9_g2	TRINITY_DN18865_c7_g5	TRINITY_DN16208_c4_g2	TRINITY_DN19650_c4_g3		TRINITY_DN19540_c2_g3
OG0005884	NA	NA	NA	NA	NA	NA	NA	DW	NA	8	1	0	1	1	OG0005884	TRINITY_DN1202_c4_g1	TRINITY_DN19012_c3_g6	TRINITY_DN46274_c4_g1	TRINITY_DN24276_c7_g4	TRINITY_DN22208_c7_g1	TRINITY_DN20664_c4_g2	TRINITY_DN18687_c4_g4		TRINITY_DN20590_c4_g1
OG0005886	NA	NA	NA	NA	NA	NA	NA	DW	NA	8	1	0	1	1	OG0005886	TRINITY_DN1206_c0_g2	TRINITY_DN19268_c0_g1	TRINITY_DN46341_c0_g1	TRINITY_DN21969_c6_g1	TRINITY_DN24535_c8_g1	TRINITY_DN15291_c8_g1	TRINITY_DN18845_c6_g2		TRINITY_DN21878_c6_g1
OG0005891	NA	DW	NA	NA	NA	NA	NA	NA	NA	8	1	0	1	1	OG0005891	TRINITY_DN12144_c0_g1	TRINITY_DN43113_c0_g1	TRINITY_DN39092_c0_g1	TRINITY_DN24259_c5_g3		TRINITY_DN20645_c10_g2	TRINITY_DN15695_c0_g1	TRINITY_DN1183_c0_g1	TRINITY_DN44668_c0_g1
OG0005898	NA	NA	NA	NA	NA	NA	NA	DW	NA	8	1	0	1	1	OG0005898	TRINITY_DN1223_c1_g2	TRINITY_DN16043_c0_g1	TRINITY_DN43324_c0_g1	TRINITY_DN23287_c7_g1	TRINITY_DN18011_c0_g1	TRINITY_DN12448_c0_g1	TRINITY_DN18652_c6_g1		TRINITY_DN20266_c3_g1
OG0005902	NA	NA	NA	NA	NA	NA	NA	DW	NA	8	1	0	1	1	OG0005902	TRINITY_DN1228_c1_g1	TRINITY_DN16999_c0_g1	TRINITY_DN47740_c0_g2	TRINITY_DN23528_c0_g1	TRINITY_DN21216_c5_g1	TRINITY_DN21244_c3_g1		TRINITY_DN2571_c0_g2
OG0005912	NA	NA	NA	NA	NA	NA	NA	DW	NA	8	1	0	1	1	OG0005912	TRINITY_DN12445_c0_g1	TRINITY_DN16390_c5_g3	TRINITY_DN40130_c0_g1	TRINITY_DN20284_c0_g1	TRINITY_DN23908_c6_g1	TRINITY_DN12856_c6_g4	TRINITY_DN16566_c0_g1		TRINITY_DN21071_c7_g1
OG0005929	NA	NA	NA	NA	NA	NA	NA	DW	NA	8	1	0	1	1	OG0005929	TRINITY_DN126_c0_g2	TRINITY_DN16891_c3_g1	TRINITY_DN46561_c6_g1	TRINITY_DN21211_c0_g1	TRINITY_DN24713_c11_g1	TRINITY_DN18314_c8_g1	TRINITY_DN19453_c8_g1		TRINITY_DN23241_c2_g2
OG0005930	NA	NA	DW	NA	NA	NA	NA	NA	NA	8	1	0	1	1	OG0005930	TRINITY_DN12702_c0_g2	TRINITY_DN15462_c0_g1	TRINITY_DN37821_c0_g1	TRINITY_DN18762_c0_g2	TRINITY_DN24250_c4_g1		TRINITY_DN38188_c0_g1	TRINITY_DN4387_c2_g1
OG0005932	NA	NA	NA	NA	NA	NA	NA	DW	NA	8	1	0	1	1	OG0005932	TRINITY_DN1276_c2_g2	TRINITY_DN16640_c3_g1	TRINITY_DN47269_c0_g1	TRINITY_DN22060_c0_g1	TRINITY_DN19495_c7_g1	TRINITY_DN19545_c2_g1	TRINITY_DN19507_c7_g2		TRINITY_DN23795_c5_g2
OG0005934	NA	NA	UP	NA	NA	NA	NA	NA	NA	8	0	1	1	1	OG0005934	TRINITY_DN12801_c1_g1		TRINITY_DN44177_c6_g2	TRINITY_DN23506_c3_g1	TRINITY_DN18946_c5_g2	TRINITY_DN14690_c6_g1	TRINITY_DN16543_c0_g1	TRINITY_DN634_c0_g1	TRINITY_DN22894_c5_g1
OG0005944	NA	NA	UP	NA	NA	NA	NA	NA	NA	8	0	1	1	1	OG0005944	TRINITY_DN13069_c2_g1	TRINITY_DN19347_c5_g2	TRINITY_DN22364_c0_g1	TRINITY_DN20202_c0_g1	TRINITY_DN20204_c5_g1		TRINITY_DN16600_c0_g1	TRINITY_DN3127_c0_g1	TRINITY_DN19595_c6_g1
OG0005949	NA	NA	NA	NA	NA	NA	NA	DW	NA	8	1	0	1	1	OG0005949	TRINITY_DN1321_c0_g5	TRINITY_DN16961_c2_g7	TRINITY_DN45918_c6_g1	TRINITY_DN22908_c4_g4	TRINITY_DN22509_c5_g1	TRINITY_DN16251_c6_g1	TRINITY_DN20784_c6_g3		TRINITY_DN20358_c11_g1
OG0005950	NA	NA	NA	NA	NA	NA	NA	DW	NA	8	1	0	1	1	OG0005950	TRINITY_DN1324_c1_g1	TRINITY_DN17233_c7_g1	TRINITY_DN42914_c0_g1	TRINITY_DN19393_c0_g1	TRINITY_DN20104_c6_g1	TRINITY_DN20135_c7_g1	TRINITY_DN19694_c8_g4		TRINITY_DN19188_c8_g1
OG0005960	NA	NA	NA	NA	NA	NA	NA	DW	NA	8	1	0	1	1	OG0005960	TRINITY_DN1346_c0_g2	TRINITY_DN18239_c5_g2	TRINITY_DN46377_c3_g1	TRINITY_DN22462_c0_g1	TRINITY_DN19312_c11_g1		TRINITY_DN20072_c6_g1		TRINITY_DN22738_c8_g1
OG0005969	NA	NA	NA	NA	NA	NA	NA	NA	DW	8	1	0	1	1	OG0005969	TRINITY_DN1359_c4_g1	TRINITY_DN14141_c0_g1		TRINITY_DN22092_c7_g1	TRINITY_DN18680_c3_g2	TRINITY_DN15750_c4_g1	TRINITY_DN17602_c9_g1	TRINITY_DN6057_c0_g1	TRINITY_DN21632_c4_g1
OG0005970	NA	NA	NA	NA	NA	NA	NA	DW	NA	8	1	0	1	1	OG0005970	TRINITY_DN1360_c0_g2	TRINITY_DN17643_c5_g2	TRINITY_DN48283_c1_g2	TRINITY_DN24427_c8_g1	TRINITY_DN23906_c5_g1	TRINITY_DN19884_c0_g1	TRINITY_DN19332_c7_g1		TRINITY_DN23495_c4_g2
OG0005979	NA	NA	NA	NA	NA	NA	NA	DW	NA	8	1	0	1	1	OG0005979	TRINITY_DN1383_c0_g3	TRINITY_DN18046_c0_g3	TRINITY_DN40984_c0_g1	TRINITY_DN22054_c0_g2	TRINITY_DN24741_c10_g2	TRINITY_DN21257_c5_g1	TRINITY_DN13549_c0_g1		TRINITY_DN23227_c0_g2
OG0005982	NA	NA	NA	NA	NA	NA	NA	DW	NA	8	1	0	1	1	OG0005982	TRINITY_DN1390_c0_g1	TRINITY_DN16189_c5_g1	TRINITY_DN46810_c6_g2	TRINITY_DN21030_c0_g1	TRINITY_DN19941_c6_g1	TRINITY_DN18612_c9_g1	TRINITY_DN19789_c7_g1		TRINITY_DN21227_c4_g2
OG0005984	NA	NA	NA	NA	UP	NA	NA	NA	NA	8	0	1	1	1	OG0005984	TRINITY_DN1395_c0_g2	TRINITY_DN16422_c0_g1	TRINITY_DN42475_c0_g2	TRINITY_DN21362_c0_g1	TRINITY_DN23407_c0_g1		TRINITY_DN20839_c1_g1	TRINITY_DN3463_c0_g1	TRINITY_DN18890_c5_g3
OG0005986	NA	NA	NA	NA	NA	NA	NA	DW	NA	8	1	0	1	1	OG0005986	TRINITY_DN13_c1_g1		TRINITY_DN45831_c2_g1	TRINITY_DN24295_c8_g1	TRINITY_DN18924_c3_g1	TRINITY_DN18507_c5_g2	TRINITY_DN21262_c3_g2		TRINITY_DN22669_c7_g6
OG0005987	NA	NA	NA	NA	NA	NA	NA	DW	NA	8	1	0	1	1	OG0005987	TRINITY_DN1400_c0_g1	TRINITY_DN18674_c2_g4	TRINITY_DN47520_c0_g1	TRINITY_DN23074_c9_g1	TRINITY_DN23591_c12_g1	TRINITY_DN18065_c8_g1	TRINITY_DN17691_c0_g2		TRINITY_DN20043_c5_g1
OG0005999	NA	NA	NA	NA	NA	NA	NA	DW	NA	8	1	0	1	1	OG0005999	TRINITY_DN1430_c0_g1	TRINITY_DN16987_c3_g1	TRINITY_DN47578_c0_g1	TRINITY_DN21379_c0_g1	TRINITY_DN24630_c5_g2	TRINITY_DN14795_c1_g3	TRINITY_DN17750_c0_g1
OG0006002	NA	NA	NA	NA	NA	NA	NA	DW	NA	8	1	0	1	1	OG0006002	TRINITY_DN14424_c0_g2	TRINITY_DN16359_c0_g2	TRINITY_DN48054_c0_g1	TRINITY_DN23975_c3_g2	TRINITY_DN19862_c0_g1	TRINITY_DN19557_c1_g1	TRINITY_DN18779_c3_g2		TRINITY_DN19361_c3_g2
OG0006005	NA	NA	NA	NA	NA	NA	NA	DW	NA	8	1	0	1	1	OG0006005	TRINITY_DN1445_c3_g1	TRINITY_DN16454_c4_g6	TRINITY_DN40824_c0_g1	TRINITY_DN20247_c0_g1	TRINITY_DN20703_c7_g1	TRINITY_DN16855_c4_g5	TRINITY_DN18357_c5_g1		TRINITY_DN22464_c11_g1
OG0006008	NA	NA	NA	NA	NA	NA	NA	DW	NA	8	1	0	1	1	OG0006008	TRINITY_DN1464_c0_g2	TRINITY_DN18077_c7_g1	TRINITY_DN44624_c0_g1	TRINITY_DN24485_c9_g1	TRINITY_DN21618_c5_g3	TRINITY_DN20145_c2_g1	TRINITY_DN17663_c10_g2		TRINITY_DN9198_c0_g1
OG0006009	NA	NA	NA	NA	NA	NA	NA	DW	NA	8	1	0	1	1	OG0006009	TRINITY_DN1466_c0_g1	TRINITY_DN17274_c6_g2	TRINITY_DN46330_c3_g1		TRINITY_DN18682_c0_g1	TRINITY_DN20159_c2_g1	TRINITY_DN20322_c8_g2	TRINITY_DN1327_c0_g1	TRINITY_DN22182_c7_g1
OG0006011	NA	NA	NA	NA	NA	NA	NA	DW	NA	8	1	0	1	1	OG0006011	TRINITY_DN1472_c1_g2	TRINITY_DN19089_c3_g1	TRINITY_DN47556_c8_g2	TRINITY_DN24319_c6_g1	TRINITY_DN18174_c8_g1	TRINITY_DN16295_c4_g1	TRINITY_DN21108_c4_g2		TRINITY_DN20127_c5_g3
OG0006017	NA	NA	NA	NA	NA	NA	NA	DW	NA	8	1	0	1	1	OG0006017	TRINITY_DN1487_c0_g1	TRINITY_DN18409_c10_g3	TRINITY_DN44202_c8_g1	TRINITY_DN21313_c9_g1	TRINITY_DN18605_c5_g2	TRINITY_DN14696_c4_g1	TRINITY_DN18681_c8_g4		TRINITY_DN19452_c7_g2
OG0006019	NA	NA	NA	NA	NA	NA	NA	DW	NA	8	1	0	1	1	OG0006019	TRINITY_DN1492_c0_g2	TRINITY_DN17270_c7_g2	TRINITY_DN48746_c0_g1	TRINITY_DN23715_c4_g1	TRINITY_DN23922_c7_g1	TRINITY_DN21395_c9_g2	TRINITY_DN20892_c1_g1		TRINITY_DN20619_c3_g3
OG0006020	NA	NA	DW	NA	NA	NA	NA	NA	NA	8	1	0	1	1	OG0006020	TRINITY_DN1499_c1_g2	TRINITY_DN19382_c6_g6	TRINITY_DN47926_c0_g2	TRINITY_DN24892_c2_g2	TRINITY_DN19014_c10_g1	TRINITY_DN20782_c5_g2	TRINITY_DN20490_c7_g3	TRINITY_DN1203_c6_g1
OG0006025	NA	NA	NA	NA	NA	NA	NA	DW	NA	8	1	0	1	1	OG0006025	TRINITY_DN15127_c0_g1	TRINITY_DN17459_c4_g1	TRINITY_DN45802_c7_g10	TRINITY_DN24203_c5_g6	TRINITY_DN24827_c7_g1	TRINITY_DN13937_c9_g8	TRINITY_DN17605_c7_g6		TRINITY_DN18621_c4_g4
OG0006030	NA	NA	NA	NA	NA	NA	NA	DW	NA	8	1	0	1	1	OG0006030	TRINITY_DN1528_c0_g1	TRINITY_DN16735_c6_g1	TRINITY_DN40867_c0_g1	TRINITY_DN22018_c2_g2	TRINITY_DN21886_c5_g1	TRINITY_DN12162_c0_g1	TRINITY_DN19042_c3_g3		TRINITY_DN18365_c6_g1
OG0006032	UP	NA	NA	NA	NA	NA	NA	NA	NA	8	0	1	1	1	OG0006032	TRINITY_DN1530_c0_g2	TRINITY_DN19465_c4_g1	TRINITY_DN41111_c0_g1		TRINITY_DN17675_c0_g1	TRINITY_DN17312_c11_g2	TRINITY_DN16505_c0_g1	TRINITY_DN3066_c0_g2	TRINITY_DN63994_c0_g1
OG0006035	NA	NA	NA	NA	NA	NA	NA	DW	NA	8	1	0	1	1	OG0006035	TRINITY_DN15361_c0_g1	TRINITY_DN17381_c6_g1	TRINITY_DN47028_c1_g1	TRINITY_DN23256_c7_g3	TRINITY_DN22073_c6_g2	TRINITY_DN13142_c0_g2	TRINITY_DN18086_c1_g1		TRINITY_DN19739_c9_g1
OG0006036	NA	NA	DW	NA	NA	NA	NA	NA	NA	8	1	0	1	1	OG0006036	TRINITY_DN15413_c0_g1	TRINITY_DN16111_c0_g3	TRINITY_DN42172_c1_g1	TRINITY_DN19194_c0_g2	TRINITY_DN22651_c4_g1		TRINITY_DN20398_c6_g2	TRINITY_DN255_c0_g2	TRINITY_DN19169_c4_g1
OG0006043	NA	NA	DW	NA	NA	NA	NA	NA	NA	8	1	0	1	1	OG0006043	TRINITY_DN1554_c0_g1		TRINITY_DN35316_c0_g1	TRINITY_DN20768_c0_g1	TRINITY_DN19618_c2_g1	TRINITY_DN19047_c1_g2		TRINITY_DN2114_c1_g1	TRINITY_DN20268_c6_g1
OG0006047	NA	NA	NA	NA	NA	NA	NA	DW	NA	8	1	0	1	1	OG0006047	TRINITY_DN15653_c1_g1	TRINITY_DN15211_c0_g1	TRINITY_DN42753_c4_g2	TRINITY_DN4623_c0_g1	TRINITY_DN21956_c2_g1	TRINITY_DN11953_c0_g1	TRINITY_DN16654_c0_g1		TRINITY_DN20526_c7_g1
OG0006050	NA	NA	NA	NA	NA	NA	NA	DW	NA	8	1	0	1	1	OG0006050	TRINITY_DN15718_c3_g1	TRINITY_DN18746_c3_g1	TRINITY_DN33803_c0_g2	TRINITY_DN13819_c0_g1	TRINITY_DN16856_c0_g1	TRINITY_DN13439_c1_g2	TRINITY_DN17468_c4_g2		TRINITY_DN23296_c1_g1
OG0006052	NA	NA	NA	NA	NA	NA	NA	DW	NA	8	1	0	1	1	OG0006052	TRINITY_DN15783_c2_g3	TRINITY_DN16305_c1_g1	TRINITY_DN43561_c0_g1	TRINITY_DN23695_c4_g3	TRINITY_DN21160_c4_g1	TRINITY_DN12371_c2_g2	TRINITY_DN19881_c1_g1		TRINITY_DN21080_c4_g2
OG0006055	NA	NA	DW	NA	NA	NA	NA	NA	NA	8	1	0	1	1	OG0006055	TRINITY_DN15831_c9_g1	TRINITY_DN17682_c0_g9	TRINITY_DN23066_c0_g1	TRINITY_DN61416_c0_g1	TRINITY_DN30553_c0_g1	TRINITY_DN34861_c0_g1		TRINITY_DN35942_c2_g1	TRINITY_DN22466_c4_g1
OG0006059	NA	NA	DW	NA	NA	NA	NA	NA	NA	8	1	0	1	1	OG0006059	TRINITY_DN16015_c1_g2	TRINITY_DN17987_c9_g3	TRINITY_DN46039_c3_g6		TRINITY_DN20967_c5_g1	TRINITY_DN12295_c9_g1	TRINITY_DN18941_c5_g8	TRINITY_DN7442_c0_g1	TRINITY_DN20439_c10_g4
OG0006065	NA	NA	UP	NA	NA	NA	NA	NA	NA	8	0	1	1	1	OG0006065	TRINITY_DN16118_c1_g1	TRINITY_DN15595_c0_g1	TRINITY_DN39694_c0_g1	TRINITY_DN20006_c0_g1	TRINITY_DN17199_c0_g1	TRINITY_DN15026_c2_g1	TRINITY_DN15672_c0_g1	TRINITY_DN6366_c0_g2
OG0006066	NA	NA	NA	NA	NA	NA	NA	DW	NA	8	1	0	1	1	OG0006066	TRINITY_DN16175_c0_g2	TRINITY_DN18138_c5_g1	TRINITY_DN48385_c11_g1	TRINITY_DN23873_c6_g1	TRINITY_DN23504_c3_g1	TRINITY_DN20154_c3_g1	TRINITY_DN17823_c6_g1
OG0006068	NA	NA	DW	NA	NA	NA	NA	NA	NA	8	1	0	1	1	OG0006068	TRINITY_DN161_c0_g3	TRINITY_DN17037_c8_g1	TRINITY_DN44617_c5_g2	TRINITY_DN21851_c6_g3		TRINITY_DN18009_c7_g3		TRINITY_DN3806_c0_g2	TRINITY_DN21509_c1_g2
OG0006069	NA	NA	UP	NA	NA	NA	NA	NA	NA	8	0	1	1	1	OG0006069	TRINITY_DN161_c11_g1	TRINITY_DN16806_c5_g2	TRINITY_DN39608_c0_g1	TRINITY_DN22440_c9_g5	TRINITY_DN17782_c0_g1		TRINITY_DN43479_c0_g1	TRINITY_DN7747_c0_g1	TRINITY_DN21509_c1_g4
OG0006078	NA	NA	NA	NA	NA	NA	NA	UP	NA	8	0	1	1	1	OG0006078	TRINITY_DN16490_c0_g2	TRINITY_DN19293_c4_g3	TRINITY_DN44056_c0_g1	TRINITY_DN20198_c0_g1	TRINITY_DN20537_c9_g1		TRINITY_DN15606_c0_g1	TRINITY_DN9126_c0_g2	TRINITY_DN20934_c0_g1
OG0006086	NA	NA	NA	NA	NA	NA	NA	DW	NA	8	1	0	1	1	OG0006086	TRINITY_DN16601_c0_g2	TRINITY_DN19377_c2_g5	TRINITY_DN41823_c7_g1	TRINITY_DN24562_c7_g2	TRINITY_DN24719_c5_g1	TRINITY_DN20946_c2_g1	TRINITY_DN20032_c7_g2		TRINITY_DN18735_c5_g2
OG0006092	NA	NA	NA	NA	NA	NA	NA	DW	NA	8	1	0	1	1	OG0006092	TRINITY_DN1694_c0_g2	TRINITY_DN17676_c2_g1	TRINITY_DN38944_c0_g1	TRINITY_DN20926_c0_g1	TRINITY_DN20100_c7_g2	TRINITY_DN17544_c5_g3	TRINITY_DN16557_c0_g1		TRINITY_DN19133_c0_g2
OG0006095	NA	NA	NA	NA	NA	NA	NA	DW	NA	8	1	0	1	1	OG0006095	TRINITY_DN17079_c0_g1	TRINITY_DN15526_c0_g1	TRINITY_DN73909_c0_g1	TRINITY_DN43725_c0_g1	TRINITY_DN37666_c0_g1	TRINITY_DN16140_c5_g1	TRINITY_DN26004_c0_g1
OG0006098	NA	NA	UP	NA	NA	NA	NA	NA	NA	8	0	1	1	1	OG0006098	TRINITY_DN17106_c0_g1	TRINITY_DN18534_c1_g2	TRINITY_DN48119_c4_g3	TRINITY_DN22499_c0_g2	TRINITY_DN22120_c6_g1	TRINITY_DN19218_c5_g3		TRINITY_DN2715_c0_g2	TRINITY_DN21613_c7_g3
OG0006102	NA	NA	DW	NA	NA	NA	NA	NA	NA	8	1	0	1	1	OG0006102	TRINITY_DN1722_c2_g1	TRINITY_DN16346_c2_g1	TRINITY_DN45858_c10_g1	TRINITY_DN22056_c6_g1	TRINITY_DN24233_c8_g1	TRINITY_DN14900_c7_g1		TRINITY_DN1506_c1_g3	TRINITY_DN21936_c6_g7
OG0006105	NA	NA	NA	NA	NA	NA	NA	DW	NA	8	1	0	1	1	OG0006105	TRINITY_DN1726_c0_g2	TRINITY_DN19469_c1_g1	TRINITY_DN45444_c0_g1	TRINITY_DN23770_c4_g1	TRINITY_DN24608_c0_g1	TRINITY_DN19872_c5_g1			TRINITY_DN22862_c7_g1
OG0006114	NA	NA	UP	NA	NA	NA	NA	NA	NA	8	0	1	1	1	OG0006114	TRINITY_DN1745_c0_g1	TRINITY_DN19688_c5_g6	TRINITY_DN37259_c0_g1	TRINITY_DN24246_c12_g1	TRINITY_DN16831_c0_g1	TRINITY_DN12299_c4_g1	TRINITY_DN21375_c1_g3	TRINITY_DN6180_c0_g2
OG0006115	NA	NA	NA	NA	NA	NA	NA	DW	NA	8	1	0	1	1	OG0006115	TRINITY_DN1757_c0_g2	TRINITY_DN12364_c0_g1	TRINITY_DN46382_c3_g3	TRINITY_DN23066_c1_g1	TRINITY_DN21858_c6_g1	TRINITY_DN17760_c5_g1	TRINITY_DN19654_c4_g2		TRINITY_DN23349_c0_g1
OG0006125	NA	NA	NA	NA	NA	NA	NA	UP	NA	8	0	1	1	1	OG0006125	TRINITY_DN1791_c0_g1	TRINITY_DN14619_c0_g1	TRINITY_DN40038_c0_g1	TRINITY_DN24087_c5_g3		TRINITY_DN18749_c5_g4	TRINITY_DN20209_c7_g1	TRINITY_DN446_c0_g1
OG0006128	NA	NA	UP	NA	NA	NA	NA	NA	NA	8	0	1	1	1	OG0006128	TRINITY_DN1807_c0_g1		TRINITY_DN40653_c0_g2	TRINITY_DN20965_c0_g1	TRINITY_DN17690_c0_g1	TRINITY_DN12334_c0_g2	TRINITY_DN16842_c0_g1	TRINITY_DN281_c2_g1	TRINITY_DN20869_c5_g1
OG0006135	NA	NA	NA	NA	NA	NA	NA	UP	NA	8	0	1	1	1	OG0006135	TRINITY_DN18343_c5_g1	TRINITY_DN16516_c1_g4		TRINITY_DN22995_c4_g12	TRINITY_DN25130_c5_g5	TRINITY_DN15361_c5_g3	TRINITY_DN17935_c9_g2	TRINITY_DN1568_c1_g1	TRINITY_DN22389_c2_g1
OG0006142	NA	NA	NA	NA	NA	NA	NA	DW	NA	8	1	0	1	1	OG0006142	TRINITY_DN1850_c0_g2	TRINITY_DN18416_c3_g3	TRINITY_DN46865_c0_g1	TRINITY_DN21454_c8_g1	TRINITY_DN24452_c4_g5	TRINITY_DN14673_c7_g1	TRINITY_DN17704_c9_g1		TRINITY_DN18996_c2_g2
OG0006145	NA	NA	NA	NA	NA	NA	NA	UP	NA	8	0	1	1	1	OG0006145	TRINITY_DN18599_c1_g1	TRINITY_DN15471_c0_g1	TRINITY_DN39848_c0_g1	TRINITY_DN20804_c0_g1	TRINITY_DN17702_c0_g1	TRINITY_DN17178_c6_g1	TRINITY_DN16616_c0_g1	TRINITY_DN3150_c0_g1
OG0006152	NA	NA	NA	NA	NA	NA	NA	DW	NA	8	1	0	1	1	OG0006152	TRINITY_DN1891_c0_g1	TRINITY_DN15909_c0_g1	TRINITY_DN40578_c0_g2	TRINITY_DN21618_c9_g1	TRINITY_DN21885_c4_g2	TRINITY_DN17478_c7_g2	TRINITY_DN17384_c0_g1		TRINITY_DN22433_c1_g3
OG0006153	NA	NA	UP	NA	NA	NA	NA	NA	NA	8	0	1	1	1	OG0006153	TRINITY_DN18939_c0_g1	TRINITY_DN27850_c0_g1	TRINITY_DN48977_c7_g1	TRINITY_DN30404_c0_g1	TRINITY_DN18094_c2_g3	TRINITY_DN15950_c2_g5		TRINITY_DN17280_c4_g1	TRINITY_DN18904_c9_g1
OG0006154	NA	NA	NA	NA	NA	NA	NA	DW	NA	8	1	0	1	1	OG0006154	TRINITY_DN18972_c0_g1	TRINITY_DN13059_c0_g1	TRINITY_DN81225_c0_g1	TRINITY_DN10533_c0_g1	TRINITY_DN16337_c0_g1		TRINITY_DN43542_c0_g1		TRINITY_DN20672_c2_g2
OG0006155	NA	NA	NA	NA	NA	NA	NA	DW	NA	8	1	0	1	1	OG0006155	TRINITY_DN18_c5_g1	TRINITY_DN19746_c10_g1	TRINITY_DN46142_c6_g1	TRINITY_DN23233_c5_g4	TRINITY_DN23202_c9_g1	TRINITY_DN19573_c5_g1	TRINITY_DN20588_c10_g2		TRINITY_DN22506_c0_g3
OG0006157	NA	NA	NA	NA	NA	NA	NA	DW	NA	8	1	0	1	1	OG0006157	TRINITY_DN190_c1_g1	TRINITY_DN17595_c6_g1	TRINITY_DN48051_c5_g1	TRINITY_DN22268_c8_g1	TRINITY_DN24260_c7_g1	TRINITY_DN19678_c5_g1	TRINITY_DN21299_c4_g1		TRINITY_DN21268_c3_g2
OG0006162	NA	NA	UP	NA	NA	NA	NA	NA	NA	8	0	1	1	1	OG0006162	TRINITY_DN1928_c0_g2		TRINITY_DN31742_c0_g1	TRINITY_DN18252_c0_g1	TRINITY_DN14968_c0_g1	TRINITY_DN16907_c7_g2	TRINITY_DN11976_c0_g1	TRINITY_DN2409_c2_g1	TRINITY_DN20047_c0_g3
OG0006164	NA	NA	UP	NA	NA	NA	NA	NA	NA	8	0	1	1	1	OG0006164	TRINITY_DN1935_c0_g2	TRINITY_DN18662_c2_g1	TRINITY_DN45159_c0_g1	TRINITY_DN22909_c3_g1	TRINITY_DN17384_c0_g1	TRINITY_DN17407_c9_g1	TRINITY_DN17084_c0_g1	TRINITY_DN10110_c0_g1
OG0006165	NA	NA	NA	NA	NA	NA	NA	DW	NA	8	1	0	1	1	OG0006165	TRINITY_DN19474_c0_g1	TRINITY_DN18212_c8_g1	TRINITY_DN45553_c0_g1	TRINITY_DN23390_c3_g2	TRINITY_DN21754_c9_g1	TRINITY_DN18637_c5_g1	TRINITY_DN19888_c9_g1		TRINITY_DN19198_c11_g1
OG0006166	NA	NA	NA	NA	NA	NA	NA	DW	NA	8	1	0	1	1	OG0006166	TRINITY_DN1950_c0_g2	TRINITY_DN17540_c2_g1	TRINITY_DN44540_c0_g1	TRINITY_DN22012_c4_g1	TRINITY_DN19718_c0_g1	TRINITY_DN18742_c10_g1	TRINITY_DN17452_c2_g1		TRINITY_DN23105_c3_g1
OG0006169	NA	NA	NA	NA	NA	NA	NA	UP	NA	8	0	1	1	1	OG0006169	TRINITY_DN1958_c0_g2		TRINITY_DN43990_c0_g1	TRINITY_DN24738_c4_g1	TRINITY_DN21870_c9_g1	TRINITY_DN16599_c8_g3	TRINITY_DN18117_c4_g1	TRINITY_DN859_c6_g2
OG0006184	NA	NA	NA	DW	NA	NA	NA	NA	NA	8	1	0	1	1	OG0006184	TRINITY_DN19765_c1_g1	TRINITY_DN14591_c0_g1	TRINITY_DN41298_c3_g2	TRINITY_DN24244_c6_g1	TRINITY_DN22331_c6_g1		TRINITY_DN16816_c0_g1	TRINITY_DN1211_c0_g1	TRINITY_DN21167_c4_g1
OG0006189	NA	NA	UP	NA	NA	NA	NA	NA	NA	8	0	1	1	1	OG0006189	TRINITY_DN1990_c1_g1	TRINITY_DN16108_c0_g1	TRINITY_DN40599_c0_g1	TRINITY_DN23031_c5_g3	TRINITY_DN22491_c5_g1	TRINITY_DN17663_c5_g1		TRINITY_DN2421_c0_g1	TRINITY_DN22236_c3_g2
OG0006192	NA	NA	NA	NA	NA	NA	NA	DW	NA	8	1	0	1	1	OG0006192	TRINITY_DN2007_c0_g1	TRINITY_DN19142_c7_g1	TRINITY_DN48369_c0_g1	TRINITY_DN23926_c2_g1	TRINITY_DN22494_c6_g1	TRINITY_DN20405_c2_g2	TRINITY_DN19589_c1_g1		TRINITY_DN20909_c5_g5
OG0006193	NA	NA	NA	NA	NA	NA	NA	UP	NA	8	0	1	1	1	OG0006193	TRINITY_DN200_c7_g2		TRINITY_DN48053_c3_g1	TRINITY_DN24390_c7_g1	TRINITY_DN23988_c6_g1	TRINITY_DN19987_c1_g1	TRINITY_DN21182_c6_g3	TRINITY_DN257_c0_g1	TRINITY_DN23780_c6_g1
OG0006195	NA	NA	UP	NA	NA	NA	NA	NA	NA	8	0	1	1	1	OG0006195	TRINITY_DN20188_c0_g1	TRINITY_DN16889_c6_g5	TRINITY_DN18246_c0_g1	TRINITY_DN23348_c2_g3	TRINITY_DN18380_c5_g2		TRINITY_DN20611_c11_g1	TRINITY_DN733_c1_g2	TRINITY_DN19843_c4_g1
OG0006199	NA	NA	NA	NA	NA	NA	NA	DW	NA	8	1	0	1	1	OG0006199	TRINITY_DN2027_c0_g2	TRINITY_DN16098_c0_g1	TRINITY_DN45879_c0_g1	TRINITY_DN21258_c0_g1	TRINITY_DN23236_c12_g1	TRINITY_DN19521_c5_g1	TRINITY_DN17463_c0_g1		TRINITY_DN22891_c0_g1
OG0006202	NA	NA	NA	DW	NA	NA	NA	NA	NA	8	1	0	1	1	OG0006202	TRINITY_DN2031_c0_g2	TRINITY_DN17330_c4_g1	TRINITY_DN47104_c1_g1	TRINITY_DN21595_c0_g1	TRINITY_DN19880_c2_g1	TRINITY_DN17067_c0_g1	TRINITY_DN21059_c8_g1	TRINITY_DN2241_c1_g2
OG0006203	NA	NA	NA	NA	NA	NA	NA	DW	NA	8	1	0	1	1	OG0006203	TRINITY_DN2036_c0_g1	TRINITY_DN16777_c4_g1	TRINITY_DN43235_c0_g1	TRINITY_DN24832_c2_g2	TRINITY_DN21060_c2_g1	TRINITY_DN19494_c2_g1	TRINITY_DN20742_c7_g1		TRINITY_DN18258_c7_g1
OG0006204	NA	NA	NA	NA	NA	NA	NA	DW	NA	8	1	0	1	1	OG0006204	TRINITY_DN20385_c3_g1	TRINITY_DN14511_c0_g2	TRINITY_DN46091_c10_g1	TRINITY_DN23437_c2_g1	TRINITY_DN18861_c4_g1	TRINITY_DN16319_c1_g1	TRINITY_DN17973_c12_g1		TRINITY_DN20394_c4_g2
OG0006223	NA	NA	DW	NA	NA	NA	NA	NA	NA	8	1	0	1	1	OG0006223	TRINITY_DN20975_c2_g1	TRINITY_DN18147_c2_g1	TRINITY_DN31841_c0_g1	TRINITY_DN4992_c0_g1	TRINITY_DN21173_c1_g1	TRINITY_DN19209_c2_g1	TRINITY_DN7739_c0_g2	TRINITY_DN3442_c1_g2
OG0006224	NA	NA	NA	NA	NA	NA	NA	UP	NA	8	0	1	1	1	OG0006224	TRINITY_DN20985_c0_g1	TRINITY_DN14587_c0_g1	TRINITY_DN44848_c0_g1	TRINITY_DN15286_c0_g1	TRINITY_DN22997_c8_g1	TRINITY_DN12163_c0_g1		TRINITY_DN12669_c0_g1	TRINITY_DN20840_c0_g1
OG0006228	NA	NA	NA	NA	NA	NA	NA	DW	NA	8	1	0	1	1	OG0006228	TRINITY_DN2104_c0_g1	TRINITY_DN16685_c7_g1	TRINITY_DN43984_c0_g1	TRINITY_DN22437_c4_g1	TRINITY_DN20270_c6_g1	TRINITY_DN19854_c5_g1	TRINITY_DN20556_c9_g1		TRINITY_DN20930_c1_g1
OG0006230	NA	NA	NA	NA	NA	NA	NA	DW	NA	8	1	0	1	1	OG0006230	TRINITY_DN2109_c2_g2	TRINITY_DN19175_c11_g1	TRINITY_DN43118_c8_g1	TRINITY_DN23084_c1_g2	TRINITY_DN19278_c2_g1		TRINITY_DN18402_c2_g1		TRINITY_DN21873_c8_g1
OG0006231	NA	NA	UP	NA	NA	NA	NA	NA	NA	8	0	1	1	1	OG0006231	TRINITY_DN21101_c0_g1	TRINITY_DN18508_c4_g1	TRINITY_DN37957_c0_g1	TRINITY_DN22569_c10_g1	TRINITY_DN22587_c4_g1		TRINITY_DN20867_c3_g1	TRINITY_DN4493_c0_g1	TRINITY_DN23732_c3_g1
OG0006233	NA	NA	NA	NA	NA	NA	NA	DW	NA	8	1	0	1	1	OG0006233	TRINITY_DN2114_c0_g2	TRINITY_DN18027_c6_g3	TRINITY_DN44134_c8_g1	TRINITY_DN23133_c6_g1	TRINITY_DN23792_c8_g1	TRINITY_DN14370_c7_g1	TRINITY_DN19717_c2_g1		TRINITY_DN20027_c6_g2
OG0006236	NA	NA	UP	NA	NA	NA	NA	NA	NA	8	0	1	1	1	OG0006236	TRINITY_DN21340_c1_g1	TRINITY_DN15096_c0_g1	TRINITY_DN38947_c0_g1	TRINITY_DN23424_c4_g1	TRINITY_DN27505_c0_g1	TRINITY_DN19053_c1_g1	TRINITY_DN180_c0_g1	TRINITY_DN1096_c0_g1
OG0006237	NA	NA	NA	NA	NA	NA	NA	DW	NA	8	1	0	1	1	OG0006237	TRINITY_DN21363_c3_g1	TRINITY_DN17109_c4_g5	TRINITY_DN47841_c5_g1	TRINITY_DN21766_c8_g1	TRINITY_DN24343_c10_g2	TRINITY_DN18520_c5_g1	TRINITY_DN19710_c5_g9		TRINITY_DN22605_c9_g1
OG0006240	NA	NA	UP	NA	NA	NA	NA	NA	NA	8	0	1	1	1	OG0006240	TRINITY_DN2146_c1_g1	TRINITY_DN16897_c1_g1	TRINITY_DN48218_c8_g1	TRINITY_DN21736_c7_g2	TRINITY_DN24303_c1_g1		TRINITY_DN19441_c6_g5	TRINITY_DN3388_c0_g1	TRINITY_DN19022_c7_g1
OG0006241	NA	NA	DW	NA	NA	NA	NA	NA	NA	8	1	0	1	1	OG0006241	TRINITY_DN214_c3_g1		TRINITY_DN37434_c0_g1	TRINITY_DN23095_c3_g1	TRINITY_DN21337_c0_g1	TRINITY_DN20972_c4_g1		TRINITY_DN8598_c0_g1	TRINITY_DN25338_c0_g1
OG0006245	DW	NA	NA	NA	NA	NA	NA	NA	NA	8	1	0	1	1	OG0006245	TRINITY_DN2187_c0_g1	TRINITY_DN16636_c0_g1	TRINITY_DN42034_c0_g1	TRINITY_DN20714_c0_g1	TRINITY_DN22556_c6_g1		TRINITY_DN21128_c5_g1	TRINITY_DN2580_c1_g2	TRINITY_DN22223_c1_g1
OG0006247	NA	NA	NA	NA	NA	NA	NA	NA	DW	8	1	0	1	1	OG0006247	TRINITY_DN22250_c0_g2	TRINITY_DN19638_c2_g1		TRINITY_DN24414_c6_g2	TRINITY_DN22331_c7_g4		TRINITY_DN20131_c4_g3	TRINITY_DN11626_c0_g1	TRINITY_DN19969_c6_g1
OG0006254	NA	NA	NA	NA	NA	NA	NA	DW	NA	8	1	0	1	1	OG0006254	TRINITY_DN224_c0_g1	TRINITY_DN17063_c5_g1	TRINITY_DN47714_c0_g2	TRINITY_DN22493_c1_g2	TRINITY_DN22351_c7_g1	TRINITY_DN17147_c0_g1	TRINITY_DN20486_c10_g2		TRINITY_DN23275_c7_g1
OG0006263	NA	NA	NA	NA	NA	NA	NA	DW	NA	8	1	0	1	1	OG0006263	TRINITY_DN2277_c0_g2	TRINITY_DN19467_c9_g5	TRINITY_DN46681_c6_g1	TRINITY_DN50959_c0_g1	TRINITY_DN23629_c1_g1	TRINITY_DN13241_c5_g3	TRINITY_DN44680_c0_g1		TRINITY_DN21557_c4_g3
OG0006267	NA	NA	NA	NA	NA	NA	NA	DW	NA	8	1	0	1	1	OG0006267	TRINITY_DN2284_c0_g1	TRINITY_DN2716_c0_g1	TRINITY_DN45410_c2_g1	TRINITY_DN22692_c4_g1	TRINITY_DN20028_c2_g1		TRINITY_DN17477_c1_g1		TRINITY_DN57490_c0_g1
OG0006271	NA	NA	NA	NA	NA	NA	NA	DW	NA	8	1	0	1	1	OG0006271	TRINITY_DN2286_c5_g2	TRINITY_DN17130_c5_g1	TRINITY_DN47271_c4_g2	TRINITY_DN22365_c7_g5	TRINITY_DN23667_c2_g1		TRINITY_DN20752_c2_g6		TRINITY_DN23601_c3_g3
OG0006274	NA	NA	NA	NA	NA	NA	NA	DW	NA	8	1	0	1	1	OG0006274	TRINITY_DN22917_c3_g1	TRINITY_DN16249_c6_g6	TRINITY_DN39138_c0_g1	TRINITY_DN19612_c0_g1	TRINITY_DN19153_c10_g2	TRINITY_DN19034_c3_g1	TRINITY_DN19330_c7_g3		TRINITY_DN12598_c0_g1
OG0006279	NA	NA	UP	NA	NA	NA	NA	NA	NA	8	0	1	1	1	OG0006279	TRINITY_DN2302_c1_g2	TRINITY_DN19299_c2_g4	TRINITY_DN40608_c0_g1	TRINITY_DN24284_c1_g1	TRINITY_DN18616_c5_g2		TRINITY_DN19445_c2_g3	TRINITY_DN2466_c0_g2
OG0006282	DW	NA	NA	NA	NA	NA	NA	NA	NA	8	1	0	1	1	OG0006282	TRINITY_DN23201_c1_g2	TRINITY_DN16331_c9_g1	TRINITY_DN41006_c0_g2	TRINITY_DN23626_c10_g5	TRINITY_DN22405_c2_g1	TRINITY_DN13348_c11_g1	TRINITY_DN16906_c0_g1	TRINITY_DN3918_c1_g1
OG0006284	NA	NA	NA	NA	NA	NA	NA	UP	NA	8	0	1	1	1	OG0006284	TRINITY_DN23253_c0_g1	TRINITY_DN18301_c2_g3	TRINITY_DN47640_c0_g2		TRINITY_DN24198_c1_g1	TRINITY_DN17485_c5_g1	TRINITY_DN18259_c7_g1	TRINITY_DN182_c0_g5	TRINITY_DN23199_c2_g3
OG0006294	NA	NA	NA	NA	NA	NA	NA	DW	NA	8	1	0	1	1	OG0006294	TRINITY_DN23646_c3_g1	TRINITY_DN18424_c10_g3	TRINITY_DN44890_c0_g1	TRINITY_DN19012_c0_g1	TRINITY_DN20349_c8_g1	TRINITY_DN18040_c8_g3	TRINITY_DN19645_c4_g2		TRINITY_DN20959_c3_g2
OG0006298	NA	NA	NA	NA	NA	NA	NA	DW	NA	8	1	0	1	1	OG0006298	TRINITY_DN23790_c1_g1	TRINITY_DN18845_c1_g1	TRINITY_DN41209_c13_g1	TRINITY_DN24423_c7_g1	TRINITY_DN18417_c5_g2	TRINITY_DN12585_c4_g1	TRINITY_DN19624_c2_g7	TRINITY_DN1604_c0_g5
OG0006301	NA	NA	NA	NA	NA	NA	NA	DW	NA	8	1	0	1	1	OG0006301	TRINITY_DN23_c1_g2		TRINITY_DN47040_c3_g1	TRINITY_DN23053_c7_g5	TRINITY_DN20462_c6_g1	TRINITY_DN13525_c3_g1	TRINITY_DN17594_c4_g1		TRINITY_DN23711_c8_g4
OG0006310	NA	NA	NA	NA	NA	NA	NA	UP	NA	8	0	1	1	1	OG0006310	TRINITY_DN24496_c0_g1	TRINITY_DN18073_c7_g2	TRINITY_DN43963_c0_g1	TRINITY_DN21873_c0_g1	TRINITY_DN22380_c5_g1	TRINITY_DN13857_c6_g1		TRINITY_DN84_c3_g2	TRINITY_DN20766_c0_g1
OG0006311	NA	NA	UP	NA	NA	NA	NA	NA	NA	8	0	1	1	1	OG0006311	TRINITY_DN2462_c0_g2		TRINITY_DN42431_c0_g1	TRINITY_DN20119_c0_g1	TRINITY_DN17650_c0_g1		TRINITY_DN16995_c0_g1	TRINITY_DN1262_c1_g2	TRINITY_DN23728_c2_g1
OG0006313	NA	NA	NA	NA	NA	NA	NA	DW	NA	8	1	0	1	1	OG0006313	TRINITY_DN2465_c0_g1	TRINITY_DN17372_c2_g1	TRINITY_DN47974_c0_g1	TRINITY_DN21429_c1_g1	TRINITY_DN21664_c3_g1	TRINITY_DN15776_c6_g2	TRINITY_DN18258_c8_g1		TRINITY_DN22490_c9_g1
OG0006316	NA	NA	DW	NA	NA	NA	NA	NA	NA	8	1	0	1	1	OG0006316	TRINITY_DN2473_c2_g1	TRINITY_DN17016_c6_g3	TRINITY_DN40875_c0_g1	TRINITY_DN24197_c14_g1		TRINITY_DN18436_c6_g1	TRINITY_DN18824_c3_g1	TRINITY_DN2807_c1_g1	TRINITY_DN21202_c2_g1
OG0006324	NA	NA	UP	NA	NA	NA	NA	NA	NA	8	0	1	1	1	OG0006324	TRINITY_DN2509_c0_g2		TRINITY_DN3459_c0_g1	TRINITY_DN20578_c0_g1	TRINITY_DN17626_c0_g1	TRINITY_DN21101_c8_g1	TRINITY_DN16891_c0_g1	TRINITY_DN3295_c0_g2	TRINITY_DN22708_c2_g1
OG0006326	NA	NA	NA	NA	NA	NA	NA	DW	NA	8	1	0	1	1	OG0006326	TRINITY_DN2512_c7_g2	TRINITY_DN19018_c8_g1	TRINITY_DN46969_c4_g1	TRINITY_DN24851_c6_g1	TRINITY_DN19238_c7_g1	TRINITY_DN13715_c7_g1	TRINITY_DN20262_c3_g1		TRINITY_DN19213_c4_g2
OG0006330	NA	NA	NA	NA	NA	NA	NA	UP	NA	8	0	1	1	1	OG0006330	TRINITY_DN2524_c8_g1	TRINITY_DN16157_c9_g3	TRINITY_DN40892_c0_g1	TRINITY_DN7831_c0_g1	TRINITY_DN21683_c2_g1	TRINITY_DN18892_c8_g2	TRINITY_DN16113_c0_g1	TRINITY_DN1808_c2_g2
OG0006331	NA	NA	DW	NA	NA	NA	NA	NA	NA	8	1	0	1	1	OG0006331	TRINITY_DN25295_c5_g1	TRINITY_DN8147_c0_g2	TRINITY_DN45329_c0_g1			TRINITY_DN18061_c2_g2	TRINITY_DN19157_c1_g1	TRINITY_DN28211_c0_g1	TRINITY_DN22171_c1_g1
OG0006332	NA	NA	NA	NA	NA	NA	NA	DW	NA	8	1	0	1	1	OG0006332	TRINITY_DN2532_c0_g2	TRINITY_DN19745_c1_g18	TRINITY_DN46773_c13_g1	TRINITY_DN23976_c5_g2	TRINITY_DN24983_c3_g11	TRINITY_DN16292_c2_g1	TRINITY_DN20354_c8_g1		TRINITY_DN22481_c1_g6
OG0006334	NA	NA	NA	NA	NA	NA	NA	DW	NA	8	1	0	1	1	OG0006334	TRINITY_DN25345_c1_g1	TRINITY_DN16358_c11_g5	TRINITY_DN39970_c0_g1	TRINITY_DN21979_c9_g4	TRINITY_DN17607_c0_g1	TRINITY_DN18639_c1_g1	TRINITY_DN19126_c1_g1		TRINITY_DN8986_c1_g1
OG0006335	NA	NA	NA	NA	NA	NA	NA	DW	NA	8	1	0	1	1	OG0006335	TRINITY_DN25345_c6_g1	TRINITY_DN17403_c2_g4	TRINITY_DN39970_c1_g1		TRINITY_DN525_c0_g1	TRINITY_DN18639_c1_g2	TRINITY_DN12137_c0_g1		TRINITY_DN37563_c0_g1
OG0006346	DW	NA	NA	NA	NA	NA	NA	NA	NA	8	1	0	1	1	OG0006346	TRINITY_DN2599_c0_g4	TRINITY_DN17818_c5_g6	TRINITY_DN46115_c0_g2		TRINITY_DN24572_c1_g4	TRINITY_DN17125_c8_g1		TRINITY_DN374_c0_g2	TRINITY_DN19012_c5_g1
OG0006351	NA	NA	NA	NA	NA	NA	NA	DW	NA	8	1	0	1	1	OG0006351	TRINITY_DN2618_c2_g2	TRINITY_DN16369_c5_g3	TRINITY_DN43159_c9_g2	TRINITY_DN24951_c16_g3	TRINITY_DN21956_c6_g3	TRINITY_DN19898_c8_g1	TRINITY_DN21305_c6_g4		TRINITY_DN18708_c4_g2
OG0006353	NA	NA	NA	NA	NA	NA	NA	UP	NA	8	0	1	1	1	OG0006353	TRINITY_DN2624_c0_g2	TRINITY_DN15926_c0_g2	TRINITY_DN43674_c0_g1	TRINITY_DN20961_c0_g1	TRINITY_DN19777_c2_g1		TRINITY_DN16617_c0_g1	TRINITY_DN5803_c2_g2	TRINITY_DN20764_c3_g1
OG0006356	NA	NA	NA	NA	NA	NA	NA	DW	NA	8	1	0	1	1	OG0006356	TRINITY_DN2642_c1_g2	TRINITY_DN16428_c4_g1	TRINITY_DN46428_c2_g1	TRINITY_DN24249_c2_g1	TRINITY_DN21332_c8_g1	TRINITY_DN20575_c3_g3			TRINITY_DN20914_c6_g1
OG0006357	NA	NA	DW	NA	NA	NA	NA	NA	NA	8	1	0	1	1	OG0006357	TRINITY_DN26526_c8_g1	TRINITY_DN18581_c8_g1	TRINITY_DN39360_c0_g1	TRINITY_DN16552_c0_g2	TRINITY_DN18328_c9_g1	TRINITY_DN20077_c8_g1	TRINITY_DN17656_c7_g7	TRINITY_DN5071_c0_g1
OG0006358	NA	NA	NA	NA	NA	NA	NA	DW	NA	8	1	0	1	1	OG0006358	TRINITY_DN26607_c0_g1	TRINITY_DN16379_c8_g1	TRINITY_DN45373_c2_g1	TRINITY_DN22525_c10_g1	TRINITY_DN20298_c1_g3	TRINITY_DN20905_c2_g2	TRINITY_DN18209_c1_g1		TRINITY_DN21388_c4_g1
OG0006360	NA	NA	NA	NA	NA	NA	NA	DW	NA	8	1	0	1	1	OG0006360	TRINITY_DN2670_c2_g1	TRINITY_DN18170_c9_g1	TRINITY_DN43797_c1_g3	TRINITY_DN21735_c8_g1	TRINITY_DN24717_c1_g2	TRINITY_DN14287_c5_g1	TRINITY_DN19220_c5_g1		TRINITY_DN20521_c7_g3
OG0006361	NA	NA	NA	NA	NA	NA	NA	DW	NA	8	1	0	1	1	OG0006361	TRINITY_DN2671_c0_g2	TRINITY_DN16872_c4_g2	TRINITY_DN46443_c0_g1	TRINITY_DN22860_c2_g1	TRINITY_DN24066_c8_g1	TRINITY_DN20651_c4_g1	TRINITY_DN18206_c7_g1		TRINITY_DN67_c0_g1
OG0006362	NA	NA	DW	NA	NA	NA	NA	NA	NA	8	1	0	1	1	OG0006362	TRINITY_DN2684_c0_g1		TRINITY_DN45002_c0_g1	TRINITY_DN23031_c5_g2	TRINITY_DN23305_c8_g1	TRINITY_DN16283_c6_g1	TRINITY_DN18518_c9_g1	TRINITY_DN16170_c0_g2	TRINITY_DN21899_c4_g2
OG0006365	NA	NA	DW	NA	NA	NA	NA	NA	NA	8	1	0	1	1	OG0006365	TRINITY_DN2699_c0_g1	TRINITY_DN16812_c5_g1	TRINITY_DN44196_c7_g1	TRINITY_DN23330_c8_g1	TRINITY_DN15486_c0_g1		TRINITY_DN18229_c8_g1	TRINITY_DN2744_c0_g2	TRINITY_DN23800_c6_g1
OG0006366	NA	NA	NA	NA	NA	NA	NA	DW	NA	8	1	0	1	1	OG0006366	TRINITY_DN269_c6_g1	TRINITY_DN14686_c0_g1	TRINITY_DN40430_c0_g1	TRINITY_DN10395_c0_g1	TRINITY_DN21935_c6_g1	TRINITY_DN19085_c3_g1	TRINITY_DN16545_c0_g1		TRINITY_DN22976_c5_g1
OG0006367	NA	NA	NA	NA	NA	NA	NA	DW	NA	8	1	0	1	1	OG0006367	TRINITY_DN2704_c0_g1		TRINITY_DN39992_c0_g1	TRINITY_DN24820_c4_g1	TRINITY_DN17865_c0_g1	TRINITY_DN16785_c7_g1	TRINITY_DN18763_c5_g1		TRINITY_DN21324_c6_g1
OG0006370	NA	NA	NA	NA	NA	NA	NA	DW	NA	8	1	0	1	1	OG0006370	TRINITY_DN27093_c1_g1	TRINITY_DN15778_c0_g2	TRINITY_DN45436_c0_g1	TRINITY_DN42986_c0_g1	TRINITY_DN17085_c0_g1	TRINITY_DN13248_c8_g1	TRINITY_DN17880_c2_g3		TRINITY_DN23793_c1_g1
OG0006378	NA	NA	NA	NA	NA	NA	NA	DW	NA	8	1	0	1	1	OG0006378	TRINITY_DN2751_c2_g1	TRINITY_DN16546_c8_g3	TRINITY_DN45310_c2_g1	TRINITY_DN21974_c12_g1	TRINITY_DN22644_c6_g2	TRINITY_DN19643_c6_g2	TRINITY_DN20060_c5_g1		TRINITY_DN50981_c0_g1
OG0006379	NA	NA	NA	NA	NA	NA	NA	DW	NA	8	1	0	1	1	OG0006379	TRINITY_DN2757_c1_g1	TRINITY_DN17514_c5_g1	TRINITY_DN46259_c3_g1	TRINITY_DN23017_c1_g3	TRINITY_DN19217_c4_g1	TRINITY_DN15984_c5_g1	TRINITY_DN21154_c7_g1		TRINITY_DN23230_c8_g2
OG0006381	DW	NA	NA	NA	NA	NA	NA	NA	NA	8	1	0	1	1	OG0006381	TRINITY_DN27711_c1_g1	TRINITY_DN20612_c0_g1	TRINITY_DN39678_c0_g1	TRINITY_DN21143_c0_g4	TRINITY_DN18947_c5_g1	TRINITY_DN14262_c0_g4		TRINITY_DN6624_c2_g1
OG0006391	NA	NA	NA	NA	NA	NA	NA	DW	NA	8	1	0	1	1	OG0006391	TRINITY_DN2827_c0_g2	TRINITY_DN17746_c2_g2	TRINITY_DN45664_c0_g1	TRINITY_DN21242_c0_g1	TRINITY_DN20695_c4_g1	TRINITY_DN13755_c2_g1	TRINITY_DN17654_c8_g2		TRINITY_DN19077_c0_g1
OG0006392	NA	NA	NA	NA	NA	NA	NA	DW	NA	8	1	0	1	1	OG0006392	TRINITY_DN282_c5_g2	TRINITY_DN19052_c2_g1	TRINITY_DN45982_c2_g1	TRINITY_DN21969_c6_g2	TRINITY_DN19513_c8_g1	TRINITY_DN19140_c3_g4	TRINITY_DN19375_c2_g2		TRINITY_DN34243_c0_g1
OG0006394	UP	NA	NA	NA	NA	NA	NA	NA	NA	8	0	1	1	1	OG0006394	TRINITY_DN28411_c1_g1	TRINITY_DN18619_c4_g2	TRINITY_DN42217_c0_g1	TRINITY_DN20363_c0_g1	TRINITY_DN23325_c2_g1	TRINITY_DN16563_c0_g2	TRINITY_DN4266_c0_g1	TRINITY_DN1969_c1_g1
OG0006403	NA	NA	DW	NA	NA	NA	NA	NA	NA	8	1	0	1	1	OG0006403	TRINITY_DN288_c0_g1	TRINITY_DN15903_c0_g1	TRINITY_DN41923_c0_g3	TRINITY_DN20738_c0_g1	TRINITY_DN22814_c5_g2			TRINITY_DN705_c0_g1	TRINITY_DN26098_c0_g1
OG0006407	NA	NA	NA	NA	NA	NA	NA	DW	NA	8	1	0	1	1	OG0006407	TRINITY_DN28_c2_g1	TRINITY_DN18415_c1_g2	TRINITY_DN45695_c0_g1	TRINITY_DN22573_c7_g3	TRINITY_DN19528_c7_g1	TRINITY_DN18541_c7_g1	TRINITY_DN18880_c1_g2		TRINITY_DN22801_c7_g1
OG0006410	NA	NA	UP	NA	NA	NA	NA	NA	NA	8	0	1	1	1	OG0006410	TRINITY_DN2911_c1_g1	TRINITY_DN19117_c11_g2	TRINITY_DN46062_c5_g1		TRINITY_DN21904_c5_g3	TRINITY_DN16207_c0_g4	TRINITY_DN20606_c8_g1	TRINITY_DN3113_c0_g2	TRINITY_DN20233_c3_g1
[truncated: 61,222 more rows]

## Sheet: Agelaia
	logFC	unshrunk.logFC	logCPM	PValue	fdr			logFC	unshrunk.logFC	logCPM	PValue	fdr
[truncated: 57,963 more rows]

[truncated: 12 more sheets: Angiopolybia, Brachygastra, Metapolybia, Mischocyttarus, Polybia, Polistes, Vespa, Vespula, DEGs_4+ species, GO RESULT 4+ species, DEGs_2+ species, GO RESULT 2+ species]
