# Supplementary material for: Social complexity, life-history and lineage influence the molecular basis of castes in vespid wasps
Source: Nat Commun. 2023 Feb 24;14:1046. doi: 10.1038/s41467-023-36456-6 (PMC9958023; doi:10.1038/s41467-023-36456-6)
Supplement: Supplementary file 7 — Supplementary Data 4 [file 41467_2023_36456_MOESM7_ESM.xlsx]

## Sheet: Figure 4 a left (singletons)
#Using only true single copy orthogroups across all nine species.
	Row.names	V_cra Queen.x	V_cra Worker.x	V_vul Queen.x	V_vul Worker.x	A_caj Queen.x	A_caj Worker.x	P_can Queen.x	P_can Worker.x	A_pal Queen.x	A_pal Worker.x	M_cin Queen.x	M_cin Worker.x	M_bas Queen.x	M_bas Worker.x	P_qua Queen.x	P_qua Worker.x	B_mel Queen.x	B_mel Worker.x	V_cra Queen.y	V_cra Worker.y	V_vul Queen.y	V_vul Worker.y	A_caj Queen.y	A_caj Worker.y	P_can Queen.y	P_can Worker.y	A_pal Queen.y	A_pal Worker.y	M_cin Queen.y	M_cin Worker.y	M_bas Queen.y	M_bas Worker.y	P_qua Queen.y	P_qua Worker.y	B_mel Queen.y	B_mel Worker.y	p.coeffs	q.coeffs
1141	OG0005471	513.568	474.135	876.997	655.575	898.323	713.206	778.754	497.434	337.134	274.729	640.726	359.653	1771.57	1241.69	249.648	226.569	547.289	472.204	0.252626	-0.252626	0.914196	-0.914196	0.726851	-0.726851	1.39484	-1.39484	0.645366	-0.645366	1.77784	-1.77784	1.1127	-1.1127	0.306652	-0.306652	0.46602	-0.46602	3.03188e-06	0.00370193
1211	OG0005640	596.24	550.559	258.803	208.134	302.464	294.262	201.917	172.576	139.23	125.228	229.524	182.168	265.6	199.129	229.457	195.867	294.331	201.216	0.371492	-0.371492	1.01202	-1.01202	0.128183	-0.128183	0.730701	-0.730701	0.493773	-0.493773	1.07276	-1.07276	1.33394	-1.33394	0.736521	-0.736521	1.75242	-1.75242	4.47254e-06	0.0054565
438	OG0003772	131.679	67.0037	182.131	110.182	171.216	91.7264	206.83	104.921	419.663	293.676	285.64	135.338	594.685	372.362	70.124	57.5938	259.33	261.69	1.23981	-1.23981	0.937456	-0.937456	1.1514	-1.1514	1.24503	-1.24503	0.67268	-0.67268	1.35982	-1.35982	0.875613	-0.875613	0.373666	-0.373666	-0.0172523	0.0172523	5.51677e-06	0.00672494
17	OG0002788	500.22	428.033	520.043	426.324	324.934	268.7	216.093	195.5	192.004	169.042	151.325	147.978	292.455	285.753	147.127	137.01	167.848	145.965	1.16668	-1.16668	1.48569	-1.48569	1.42114	-1.42114	0.750585	-0.750585	0.954101	-0.954101	0.167773	-0.167773	0.173908	-0.173908	0.534201	-0.534201	1.04618	-1.04618	1.55581e-05	0.0189497
628	OG0004256	208.878	115.08	255.869	213.489	336.22	327.918	369.04	364.341	289.133	262.292	445.249	402.268	422.681	376.981	264.743	250.421	631.619	583.859	2.63401	-2.63401	0.82141	-0.82141	0.113721	-0.113721	0.0582923	-0.0582923	0.442804	-0.442804	0.461351	-0.461351	0.519899	-0.519899	0.252898	-0.252898	0.35746	-0.35746	2.27525e-05	0.0276898
801	OG0004652	245.96	439.274	521.916	319.186	164.448	183.035	652.741	496.474	254.889	202.489	209.285	126.441	184.208	98.6823	515.722	260.316	227.518	161.666	-1.21087	1.21087	1.03452	-1.03452	-0.22958	0.22958	0.583627	-0.583627	0.491726	-0.491726	1.05913	-1.05913	1.29762	-1.29762	1.4126	-1.4126	0.726246	-0.726246	3.05701e-05	0.0371732
421	OG0003736	682.921	727.249	415.336	448.092	216.832	338.373	172.6	228.017	252.082	352.878	489.87	582.09	394.902	582.708	358.682	409.776	435.133	439.639	-0.239848	0.239848	-0.289467	0.289467	-1.67033	1.67033	-1.05547	1.05547	-1.27132	1.27132	-0.65642	0.65642	-1.46581	1.46581	-0.507322	0.507322	-0.0393022	0.0393022	3.57657e-05	0.0434554
631	OG0004261	145.748	857.114	1061.19	1225.86	1198.6	1392.4	1123.14	1400.82	1241.31	1452.97	1131.71	1073.75	918.37	1136.55	1306.4	1394.68	1115.27	1433.44	-2.76151	2.76151	-0.280312	0.280312	-0.291194	0.291194	-0.428309	0.428309	-0.305844	0.305844	0.102314	-0.102314	-0.413343	0.413343	-0.127244	0.127244	-0.485996	0.485996	4.06998e-05	0.0494096
817	OG0004685	463.865	415.987	304.01	286.626	517.98	500.526	270.538	273.356	481.42	413.865	390.508	377.912	398.53	369.171	588.731	538.388	488.399	436.202	1.22565	-1.22565	0.662943	-0.662943	0.385985	-0.385985	-0.116708	0.116708	1.69956	-1.69956	0.369205	-0.369205	0.861357	-0.861357	1.00604	-1.00604	1.27155	-1.27155	9.83293e-05	0.119273
372	OG0003618	279.835	250.989	940.225	813.537	234.817	227.476	180.573	176.013	204.077	161.046	104.408	91.7818	221.107	188.487	83.219	74.8466	163.863	112.236	0.595714	-0.595714	0.791903	-0.791903	0.174066	-0.174066	0.140176	-0.140176	1.29195	-1.29195	0.705509	-0.705509	0.873049	-0.873049	0.580659	-0.580659	2.04983	-2.04983	0.00010608	0.128569
1146	OG0005483	196.899	201.697	174.888	141.093	205.635	188.931	329.251	290.328	200.147	165.783	167.428	168.119	220.838	146.959	136.697	110.618	190.122	176.204	-0.124828	0.124828	1.109	-1.109	0.438977	-0.438977	0.651392	-0.651392	0.973742	-0.973742	-0.0213504	0.0213504	2.08283	-2.08283	1.0934	-1.0934	0.393942	-0.393942	0.000116324	0.140869
541	OG0004051	603.33	587.935	476.65	453.359	355.553	400.493	748.146	788.769	385.414	443.771	414.803	466.43	400.863	435.551	526.152	560.715	299.9	342.528	0.262871	-0.262871	0.509382	-0.509382	-1.20902	1.20902	-0.537608	0.537608	-1.43151	1.43151	-1.1916	1.1916	-0.843546	0.843546	-0.646816	0.646816	-1.34967	1.34967	0.000116481	0.140942
263	OG0003311	508.882	464.614	481.083	696.844	2619.95	2437.88	130.557	157.733	534.196	626.719	773.201	1172.15	523.332	665.573	167.765	191.049	403.305	674.002	0.316133	-0.316133	-1.27341	1.27341	0.250262	-0.250262	-0.655339	0.655339	-0.554061	0.554061	-1.4257	1.4257	-0.831746	0.831746	-0.451127	0.451127	-1.74685	1.74685	0.000116559	0.140942
57	OG0002878	731.62	782.96	387.175	468.858	634.791	659.598	543.251	594.683	339.38	426.296	319.677	369.028	542.046	544.883	341.524	352.669	196.494	215.749	-0.542943	0.542943	-1.52838	1.52838	-0.306971	0.306971	-0.723954	0.723954	-1.81823	1.81823	-1.14777	1.14777	-0.0418039	0.0418039	-0.257163	0.257163	-0.748131	0.748131	0.000136891	0.165364
732	OG0004488	226.306	190.251	230.956	180.926	280.05	257.068	148.196	135.012	150.181	131.738	118.672	103.494	179.056	141.989	144.467	145.636	143.984	141.894	1.1448	-1.1448	1.60654	-1.60654	0.565918	-0.565918	0.615683	-0.615683	0.865219	-0.865219	0.903573	-0.903573	1.52706	-1.52706	-0.0533232	0.0533232	0.0966784	-0.0966784	0.000152954	0.184616
1147	OG0005485	1191.44	1218.48	1283.41	1824.85	992.286	1086.72	312.42	328.797	530.261	731.511	412.591	580.222	209.712	346.098	685.265	720.559	517.068	558.271	-0.0845927	0.0845927	-1.31373	1.31373	-0.342558	0.342558	-0.192628	0.192628	-1.20289	1.20289	-1.27338	1.27338	-1.8506	1.8506	-0.189341	0.189341	-0.288971	0.288971	0.000156451	0.18868
63	OG0002896	183.915	224.411	946.929	1005.84	517.915	554.446	2382.17	2362.67	310.467	383.37	262.646	313.287	302.767	377.694	2309.87	2370.74	235.465	296.582	-1.21986	1.21986	-0.371088	0.371088	-0.419011	0.419011	0.050552	-0.050552	-1.29239	1.29239	-1.08151	1.08151	-1.35436	1.35436	-0.15994	0.15994	-1.4129	1.4129	0.000160361	0.193235
258	OG0003306	275.916	253.666	139.8	96.7753	300.046	264.116	629.351	606.193	212.776	159.267	157.769	169.519	153.823	97.9759	115.838	89.0573	132.051	93.6267	0.309647	-0.309647	1.34035	-1.34035	0.46938	-0.46938	0.13814	-0.13814	1.06	-1.06	-0.264604	0.264604	1.63462	-1.63462	0.963296	-0.963296	1.25485	-1.25485	0.000171876	0.206938
245	OG0003278	307.409	138.043	153.035	140.265	175.048	119.865	258.624	244.281	602.962	535.538	209.745	167.183	190.722	112.885	226.128	192.318	178.985	165.155	2.12384	-2.12384	0.243204	-0.243204	1.04522	-1.04522	0.159321	-0.159321	0.33081	-0.33081	0.630764	-0.630764	1.43209	-1.43209	0.451341	-0.451341	0.224481	-0.224481	0.000201065	0.241881
1179	OG0005573	1600.16	1667.73	1536.9	1750.4	460.326	482.974	385.874	459.467	1061.09	1108.97	338.992	516.065	222.463	251.675	1304.4	1426.14	315.022	365.202	-0.232187	0.232187	-0.729349	0.729349	-0.269626	0.269626	-0.977648	0.977648	-0.247767	0.247767	-2.32562	2.32562	-0.691887	0.691887	-0.50072	0.50072	-0.828446	0.828446	0.000202448	0.243343
115	OG0003002	366.806	255.199	795.831	604.29	623.631	479.878	1250	1195.22	818.832	716.416	574.959	513.264	634.024	594.217	972.192	884.963	648.992	654.224	1.85745	-1.85745	1.41617	-1.41617	1.34853	-1.34853	0.231915	-0.231915	0.690572	-0.690572	0.586884	-0.586884	0.335502	-0.335502	0.48622	-0.48622	-0.0415593	0.0415593	0.000231324	0.27782
1098	OG0005360	869.199	992.141	911.651	1365.17	471.43	528.733	837.629	924.992	455.314	502.085	408.451	508.099	798.405	968.116	854.359	835.996	346.038	383.811	-0.698461	0.698461	-2.10639	2.10639	-0.605861	0.605861	-0.524128	0.524128	-0.516607	0.516607	-1.14969	1.14969	-1.01592	1.01592	0.114882	-0.114882	-0.547299	0.547299	0.000245538	0.294646
796	OG0004638	390.707	391.171	389.674	336.472	576.446	638.215	447.488	354.95	316.645	232.688	286.1	255.227	452.255	339.357	357.719	296.849	237.851	216.912	-0.0061622	0.0061622	0.760112	-0.760112	-0.527582	0.527582	1.19642	-1.19642	1.5856	-1.5856	0.591679	-0.591679	1.4796	-1.4796	0.964766	-0.964766	0.477704	-0.477704	0.000257965	0.3093
192	OG0003172	527.432	648.59	334.79	199.995	250.943	173.095	268.446	242.862	179.655	163.116	183.067	154.075	256.617	266.858	87.655	73.8368	310.233	232.613	-0.78016	0.78016	1.90871	-1.90871	1.39025	-1.39025	0.378904	-0.378904	0.3654	-0.3654	0.651202	-0.651202	-0.14814	0.14814	0.647962	-0.647962	1.08279	-1.08279	0.000271392	0.325127
437	OG0003771	5988.78	6326.66	3266.59	4422.83	2077.95	2123.38	1132.85	1377.76	1936.55	2482.86	2404.75	3283.71	1093.05	1535.25	3632.25	4016.85	3221.75	2983.26	-0.24748	0.24748	-1.35638	1.35638	-0.0975468	0.0975468	-0.879938	0.879938	-1.11508	1.11508	-1.39379	1.39379	-1.51764	1.51764	-0.453553	0.453553	0.346703	-0.346703	0.000296369	0.354754
844	OG0004769	127.891	142.704	655.907	596.541	441.796	422.206	692.976	656.787	569.282	503.868	579.099	597.549	365.166	311.666	420.527	406.711	786.747	661.202	-1.02001	1.02001	0.883196	-0.883196	0.422477	-0.422477	0.499581	-0.499581	1.13579	-1.13579	-0.292159	0.292159	1.47283	-1.47283	0.311185	-0.311185	1.61557	-1.61557	0.000335145	0.400833
610	OG0004211	180.641	127.942	421.953	329.159	543.446	573.515	114.046	93.3081	349.769	315.58	245.163	210.739	132.938	127.794	411.648	343.533	359.561	241.923	1.49935	-1.49935	1.08466	-1.08466	-0.236345	0.236345	0.878059	-0.878059	0.451149	-0.451149	0.662926	-0.662926	0.173235	-0.173235	0.791898	-0.791898	1.71712	-1.71712	0.000355937	0.425344
135	OG0003047	372.853	332.109	366.383	259.636	141.33	158.746	515.705	425.435	186.395	167.559	314.162	244.452	261.259	237.122	186.854	159.334	428.769	316.935	0.547996	-0.547996	1.61681	-1.61681	-0.550311	0.550311	0.909449	-0.909449	0.504578	-0.504578	1.18325	-1.18325	0.459216	-0.459216	0.753732	-0.753732	1.42198	-1.42198	0.000390521	0.466282
851	OG0004784	869.63	1168.6	1843.85	2124.44	130.622	189.922	438.305	542.573	471.033	625.534	510.647	534.066	280.513	772.75	655.746	738.571	360.357	669.35	-0.6725	0.6725	-0.324184	0.324184	-0.848166	0.848166	-0.487363	0.487363	-0.645966	0.645966	-0.102776	0.102776	-2.14265	2.14265	-0.27234	0.27234	-1.37578	1.37578	0.000450901	0.537925
12	OG0002778	196.25	189.623	586.415	349.488	622.688	653.507	544.54	500.767	566.47	461.229	603.022	496.86	705.101	563.341	474.447	396.816	847.204	773.444	0.151636	-0.151636	2.2353	-2.2353	-0.213235	0.213235	0.369758	-0.369758	0.904215	-0.904215	0.852269	-0.852269	0.986812	-0.986812	0.786749	-0.786749	0.40187	-0.40187	0.000513253	0.611798
301	OG0003423	101.929	118.074	595.219	455.317	515.712	475.022	648.116	624.876	501.628	431.036	601.628	576.007	653.828	571.154	456.028	399.605	499.567	517.564	-1.06238	1.06238	1.92786	-1.92786	0.594555	-0.594555	0.264297	-0.264297	1.09572	-1.09572	0.314962	-0.314962	0.977026	-0.977026	0.954639	-0.954639	-0.256141	0.256141	0.00055857	0.665257
368	OG0003609	913.34	531.888	604.184	371.334	181.774	162.858	339.643	240.337	307.943	228.248	712.205	485.049	290.83	232.862	371.926	303.446	525.023	642.593	1.53985	-1.53985	1.39256	-1.39256	0.320225	-0.320225	0.998925	-0.998925	0.867139	-0.867139	1.1069	-1.1069	0.645787	-0.645787	0.591556	-0.591556	-0.587451	0.587451	0.000601665	0.715982
756	OG0004549	601.304	678.924	314.997	596.792	559.704	540.729	785.031	819.458	635.814	806.412	465.947	609.261	938.682	1087.64	558.995	642.161	495.582	702.485	-0.426553	0.426553	-2.17433	2.17433	0.121309	-0.121309	-0.150956	0.150956	-0.832199	0.832199	-0.937735	0.937735	-0.517175	0.517175	-0.487113	0.487113	-1.21499	1.21499	0.000647563	0.769953
707	OG0004442	78.9671	96.9024	599.652	576.385	431.915	387.651	503.074	426.65	456.436	391.366	387.753	384.473	353.497	219.369	424.519	374.74	431.155	376.252	-0.992751	0.992751	0.1926	-0.1926	0.525758	-0.525758	0.800201	-0.800201	0.747156	-0.747156	0.0413442	-0.0413442	2.27923	-2.27923	0.606287	-0.606287	0.66196	-0.66196	0.000720418	0.855856
1150	OG0005491	179.939	180.51	342.033	727.577	753.058	1597.03	422.841	467.444	723.544	769.893	1041.3	1349.36	1138.63	1634.65	1180.13	1357.64	949.814	990.931	-0.0082079	0.0082079	-1.86854	1.86854	-1.86165	1.86165	-0.259712	0.259712	-0.16088	0.16088	-0.667996	0.667996	-0.927167	0.927167	-0.362609	0.362609	-0.109827	0.109827	0.000739062	0.877267
1169	OG0005533	279.954	342.706	838.35	629.104	771.355	768.871	825.217	797.075	476.367	399.063	453.988	388.688	443.57	461.464	484.211	355.712	674.575	572.228	-1.07197	1.07197	1.51668	-1.51668	0.0171534	-0.0171534	0.18451	-0.18451	0.939251	-0.939251	0.824247	-0.824247	-0.210298	0.210298	1.62729	-1.62729	0.873131	-0.873131	0.000766201	0.908715
810	OG0004665	278.999	245.096	1326.99	1589.94	2347.18	2271.46	718.509	900.655	954.46	1160.28	950.137	1039.49	618.286	848.029	1772.9	1893.47	1439.46	1424.17	0.755104	-0.755104	-1.05226	1.05226	0.191384	-0.191384	-1.31313	1.31313	-1.13608	1.13608	-0.524204	0.524204	-1.82891	1.82891	-0.38384	0.38384	0.0623451	-0.0623451	0.000791556	0.937994
191	OG0003166	81.7516	76.2064	561.877	255.368	173.265	134.36	99.3058	76.1886	229.818	212.735	237.674	238.528	167.667	127.08	157.011	145.106	116.937	88.3988	0.219935	-0.219935	2.34966	-2.34966	0.792328	-0.792328	0.825248	-0.825248	0.241836	-0.241836	-0.0112263	0.0112263	0.862679	-0.862679	0.246877	-0.246877	0.870714	-0.870714	0.000792441	0.93825
836	OG0004740	1217.42	1389.67	2107.02	2451.07	495.529	528.31	1401.42	1502.71	697	827.727	647.644	743.194	1352.14	1494.44	1271.33	1218.34	1134.38	1125.28	-1.1649	1.1649	-1.33086	1.33086	-0.564517	0.564517	-0.614954	0.614954	-1.51168	1.51168	-1.21128	1.21128	-0.881349	0.881349	0.375238	-0.375238	0.0709958	-0.0709958	0.000822842	0.973422
152	OG0003079	758.91	464.971	323.552	196.816	183.623	105.769	544.781	526.215	880.591	777.995	683.516	479.538	247.42	262.325	1016.31	922.952	1619.61	806.004	1.20096	-1.20096	1.21787	-1.21787	1.34524	-1.34524	0.0866825	-0.0866825	0.309314	-0.309314	0.876987	-0.876987	-0.146209	0.146209	0.240737	-0.240737	1.67726	-1.67726	0.000898475	1
958	OG0005035	793.531	660.268	1130.68	727.796	247.279	244.134	635.389	543.281	199.305	153.941	887.705	700.537	460.662	407.86	188.401	148.173	548.888	604.794	0.797653	-0.797653	1.8864	-1.8864	0.0556965	-0.0556965	0.680006	-0.680006	1.11748	-1.11748	1.02547	-1.02547	0.529032	-0.529032	1.04004	-1.04004	-0.421679	0.421679	0.000918244	1
1164	OG0005525	125.471	96.8929	409.87	320.406	1111.3	1091.93	329.414	302.844	309.908	264.365	387.725	301.247	536.628	477.796	426.96	394.784	1437.45	755.405	0.945502	-0.945502	0.901262	-0.901262	0.0646835	-0.0646835	0.309162	-0.309162	0.583445	-0.583445	0.923413	-0.923413	0.426661	-0.426661	0.288063	-0.288063	2.2882	-2.2882	0.00100804	1
54	OG0002869	238.227	239.102	736.763	730.801	235.391	251.235	567.975	598.216	190.884	219.665	280.125	298.774	1077.59	1150.47	416.526	404.674	148.757	168.639	-0.0470567	0.0470567	0.104244	-0.104244	-0.835555	0.835555	-0.665471	0.665471	-1.79905	1.79905	-0.826716	0.826716	-0.839414	0.839414	0.370365	-0.370365	-1.60751	1.60751	0.00105472	1
680	OG0004376	501.535	522.872	403.782	355.755	759.271	859.455	655.202	555.901	1245.24	1069.01	1395.55	1137.49	673.899	476.376	536.36	465.825	507.53	472.78	-0.234844	0.234844	0.712955	-0.712955	-0.697834	0.697834	0.924483	-0.924483	0.858627	-0.858627	1.14869	-1.14869	1.93615	-1.93615	0.793567	-0.793567	0.399684	-0.399684	0.00106633	1
1038	OG0005220	182.455	163.52	240.073	223.241	446.015	367.596	277.706	241.346	331.52	281.239	478.251	552.035	416.441	346.808	354.617	312.326	286.376	241.336	0.71356	-0.71356	0.473672	-0.473672	1.25666	-1.25666	0.913325	-0.913325	1.06986	-1.06986	-0.933711	0.933711	1.18948	-1.18948	0.826742	-0.826742	1.11279	-1.11279	0.0010724	1
905	OG0004914	983.464	880.681	285.276	397.07	419.728	412.611	175.822	202.065	303.449	333.937	134.311	227.125	166.85	217.953	387.018	489.928	360.349	345.43	0.437724	-0.437724	-1.30069	1.30069	0.0678814	-0.0678814	-0.551347	0.551347	-0.379744	0.379744	-2.03866	2.03866	-1.05431	1.05431	-0.931633	0.931633	0.167809	-0.167809	0.00108632	1
1129	OG0005441	288.625	385.521	393.046	491.017	254.038	255.989	391.35	457.548	366.609	422.45	632.915	721.175	634.835	577.189	757.386	832.956	513.091	637.36	-1.65024	1.65024	-1.27237	1.27237	-0.0439261	0.0439261	-0.895336	0.895336	-0.81254	0.81254	-0.748361	0.748361	0.546081	-0.546081	-0.545576	0.545576	-1.2402	1.2402	0.00111734	1
684	OG0004385	276.96	281.09	235.764	311.308	1127.2	958.181	529.882	890.155	715.808	796.353	589.683	801.732	324.74	581.445	964.206	1030.6	794.686	1035.12	-0.0465631	0.0465631	-0.868774	0.868774	0.50991	-0.50991	-1.59618	1.59618	-0.335112	0.335112	-0.9588	0.9588	-1.78224	1.78224	-0.2094	0.2094	-0.826692	0.826692	0.00115608	1
359	OG0003585	146.665	223.242	311.689	331.29	108.451	135.429	172.6	170.153	137.265	165.78	175.248	256.628	173.359	252.03	218.583	216.674	200.463	215.161	-1.63717	1.63717	-0.241091	0.241091	-0.87482	0.87482	0.0564568	-0.0564568	-0.744141	0.744141	-1.49021	1.49021	-1.46259	1.46259	0.034674	-0.034674	-0.279668	0.279668	0.0012366	1
30	OG0002813	333.617	314.923	1430.51	2307.97	1441.02	1606.49	2961.34	3108.12	2363.88	3148.1	1673.36	2197.72	2112.32	2791.51	2683.8	2851.27	1700.75	1543.97	0.242115	-0.242115	-1.97147	1.97147	-0.456071	0.456071	-0.203127	0.203127	-1.19507	1.19507	-1.13778	1.13778	-1.16336	1.16336	-0.254152	0.254152	0.405855	-0.405855	0.00141562	1
148	OG0003075	97.2862	119.005	635.678	1391.47	2060.74	2062.88	367.48	529.108	1066.9	1336.68	309.314	436.922	311.72	471.758	934.913	961.081	588.567	569.902	-0.568054	0.568054	-2.10917	2.10917	-0.00294442	0.00294442	-1.01981	1.01981	-0.634949	0.634949	-0.967378	0.967378	-1.15556	1.15556	-0.0780765	0.0780765	0.0911456	-0.0911456	0.0014325	1
246	OG0003282	128.717	132.169	536.838	520.924	152.546	78.6754	507.652	442.803	490.967	490.25	547.808	490.781	412.371	263.389	417.198	382.101	807.43	566.407	-0.0881587	0.0881587	0.100242	-0.100242	2.12875	-2.12875	0.45463	-0.45463	0.00486991	-0.00486991	0.365857	-0.365857	1.469	-1.469	0.292582	-0.292582	1.16897	-1.16897	0.00144804	1
576	OG0004128	84.4145	93.2817	150.912	107.267	197.709	143.964	187.42	180.354	124.358	86.1479	641.199	572.724	171.457	177.841	139.36	125.336	456.619	450.112	-0.470775	0.470775	1.59484	-1.59484	1.48398	-1.48398	0.181259	-0.181259	1.71244	-1.71244	0.532163	-0.532163	-0.172431	0.172431	0.499839	-0.499839	0.0677018	-0.0677018	0.00148571	1
420	OG0003735	966.542	940.295	1281.28	1472.09	694.391	622.102	1397.07	1542.09	1061.1	1334.02	988.47	1401.15	642.165	688.146	903.843	1077.28	597.413	996.747	0.11357	-0.11357	-0.571784	0.571784	0.453061	-0.453061	-0.407111	0.407111	-0.940158	0.940158	-1.4249	1.4249	-0.285183	0.285183	-0.722326	0.722326	-2.06684	2.06684	0.00152038	1
1082	OG0005319	178.502	168.212	751.437	606.205	194.232	216.029	316.526	364.141	327.242	438.475	354.18	510.445	235.754	336.844	219.249	255.749	178.325	283.788	0.214328	-0.214328	0.772574	-0.772574	-0.383709	0.383709	-0.505205	0.505205	-1.04913	1.04913	-1.30527	1.30527	-1.27503	1.27503	-0.554977	0.554977	-1.64822	1.64822	0.00153978	1
964	OG0005048	105.122	100.632	170.141	240.439	530.34	434.81	805.354	1010.61	686.625	997.957	315.533	628.475	467.713	559.788	1026.83	1239.59	361.685	415.208	0.136277	-0.136277	-1.06911	1.06911	0.618053	-0.618053	-0.705772	0.705772	-1.15401	1.15401	-2.06998	2.06998	-0.559548	0.559548	-0.586176	0.586176	-0.430189	0.430189	0.00154753	1
531	OG0004029	366.513	334.537	476.774	536.79	337.461	450.019	1364.45	1290.54	826.697	994.401	962.708	1202.59	818.774	798.333	1151.27	1189.68	863.361	1118.86	0.523251	-0.523251	-0.67928	0.67928	-1.63971	1.63971	0.319333	-0.319333	-1.05643	1.05643	-1.27093	1.27093	0.145011	-0.145011	-0.188216	0.188216	-1.47865	1.47865	0.00162381	1
387	OG0003652	1385.39	1318.8	854.77	940.759	878.943	881.586	892.305	998.147	759.88	856.446	990.572	1105.62	817.146	1041.14	1391.64	1521.86	1201.57	1121.19	0.412188	-0.412188	-0.801557	0.801557	-0.0251292	0.0251292	-0.93708	0.93708	-0.999954	0.999954	-0.918602	0.918602	-2.01744	2.01744	-0.748069	0.748069	0.579168	-0.579168	0.0017002	1
923	OG0004963	353.91	323.075	337.601	319.972	448.905	429.016	292.929	259.018	290.929	284.984	333.936	296.901	410.469	310.601	340.856	287.208	361.956	379.741	0.684016	-0.684016	0.402619	-0.402619	0.340225	-0.340225	0.92267	-0.92267	0.155035	-0.155035	0.881669	-0.881669	2.07998	-2.07998	1.2828	-1.2828	-0.360111	0.360111	0.00198749	1
906	OG0004915	986.878	913.939	663.774	979.186	666.951	631.284	991.878	1117.77	954.14	1295.06	580.663	686.582	1484.27	1496.21	1210.08	1414.22	618.095	642.524	0.397914	-0.397914	-1.99077	1.99077	0.28489	-0.28489	-0.618793	0.618793	-1.57178	1.57178	-0.866724	0.866724	-0.0415529	0.0415529	-0.806631	0.806631	-0.200946	0.200946	0.00199515	1
529	OG0004026	154.95	171.522	251.84	274.398	187.823	216.817	162.291	168.841	120.706	145.652	84.6386	112.392	193.977	183.521	106.739	107.576	82.7309	92.4637	-0.718529	0.718529	-0.606778	0.606778	-1.01426	1.01426	-0.280032	0.280032	-1.32575	1.32575	-1.99388	1.99388	0.392101	-0.392101	-0.0552603	0.0552603	-0.786391	0.786391	0.00208155	1
898	OG0004900	536.028	635.567	515.614	683.26	271.495	234.855	267.397	356.061	296.995	413.273	306.03	364.336	255.29	345.385	780.685	854.263	378.653	371.024	-0.742721	0.742721	-1.22244	1.22244	0.632576	-0.632576	-1.24323	1.24323	-1.43115	1.43115	-0.760344	0.760344	-1.31119	1.31119	-0.39342	0.39342	0.0889667	-0.0889667	0.00217966	1
289	OG0003392	484.52	544.708	1211.45	855.303	959.295	1161.45	563.364	521.932	711.954	594.474	574.495	466.889	624.797	452.231	823.827	727.582	869.47	723.432	-0.538217	0.538217	1.58598	-1.58598	-0.877309	0.877309	0.351358	-0.351358	0.827627	-0.827627	0.951003	-0.951003	1.47463	-1.47463	0.570958	-0.570958	0.843784	-0.843784	0.00220454	1
1124	OG0005432	658.394	690.624	915.835	882.776	407.517	451.005	652.063	730.197	550.472	562.481	496.765	606.432	573.248	725.212	531.698	521.64	521.046	585.016	-0.378864	0.378864	0.291476	-0.291476	-0.803269	0.803269	-0.896384	0.896384	-0.171104	0.171104	-1.5764	1.5764	-1.8559	1.8559	0.151417	-0.151417	-0.91715	0.91715	0.00221284	1
491	OG0003919	303.337	337.524	325.112	270.953	238.588	256.791	254.27	238.922	248.707	220.844	242.872	226.104	284.319	233.224	185.516	178.366	277.626	264.597	-0.9144	0.9144	1.55743	-1.55743	-0.629851	0.629851	0.53342	-0.53342	1.01716	-1.01716	0.612873	-0.612873	1.69226	-1.69226	0.336809	-0.336809	0.411861	-0.411861	0.00221732	1
411	OG0003711	282.894	282.696	214.661	137.044	152.667	92.5673	152.061	150.868	239.727	246.01	163.748	176.544	258.549	193.46	125.602	100.726	213.987	169.226	0.00257481	-0.00257481	1.62474	-1.62474	1.80428	-1.80428	0.0290064	-0.0290064	-0.0952241	0.0952241	-0.276828	0.276828	1.06016	-1.06016	0.809202	-0.809202	0.85994	-0.85994	0.00227773	1
336	OG0003530	364.212	379.853	106.456	197.251	212.006	242.155	164.626	210.849	352.018	454.124	142.135	229.293	88.9881	172.872	257.417	301.926	329.333	246.564	-0.110058	0.110058	-1.56521	1.56521	-0.347562	0.347562	-0.644521	0.644521	-0.663144	0.663144	-1.22857	1.22857	-1.67716	1.67716	-0.416612	0.416612	0.752468	-0.752468	0.00239982	1
992	OG0005117	2249.12	1912.4	1738.96	2730.33	1707.89	1998.85	361.631	519.549	1042.77	1041.23	307.263	396.653	379.816	637.172	960.659	981.381	486.848	437.9	0.560534	-0.560534	-1.53669	1.53669	-0.543801	0.543801	-1.24152	1.24152	0.00511012	-0.00511012	-0.879749	0.879749	-1.7531	1.7531	-0.0739173	0.0739173	0.366689	-0.366689	0.0025844	1
410	OG0003710	91.1279	76.036	395.36	319.277	153.755	176.395	227.287	228.623	192.846	167.266	206.535	168.583	191.536	141.992	128.267	113.922	224.32	148.872	0.808747	-0.808747	0.953702	-0.953702	-0.614303	0.614303	-0.026267	0.026267	0.636315	-0.636315	0.906316	-0.906316	1.33065	-1.33065	0.53061	-0.53061	1.81103	-1.81103	0.0026529	1
502	OG0003951	177.423	188.717	40.459	121.633	360.393	376.695	387.09	384.853	135.019	188.578	195.486	297.838	124.794	166.482	386.79	420.919	187.728	225.053	-0.151337	0.151337	-2.45697	2.45697	-0.108507	0.108507	0.0142175	-0.0142175	-0.812029	0.812029	-1.01791	1.01791	-0.70219	0.70219	-0.207312	0.207312	-0.443642	0.443642	0.00273027	1
1028	OG0005197	1133.44	1286.96	1412.15	1441.05	1191.14	1198.96	914.707	1037.38	635.25	698.953	704.206	846.215	664.406	817.856	408.537	532.806	864.697	801.358	-0.841005	0.841005	-0.13432	0.13432	-0.0433696	0.0433696	-0.833297	0.833297	-0.633102	0.633102	-1.21451	1.21451	-1.37271	1.37271	-1.75046	1.75046	0.504104	-0.504104	0.00287438	1
1165	OG0005527	53.707	114.044	165.647	153.543	270.416	193.023	370.328	345.373	261.586	227.241	284.715	295.028	332.331	276.878	338.861	315.119	293.536	295.413	-2.50832	2.50832	0.264449	-0.264449	1.16459	-1.16459	0.243155	-0.243155	0.489981	-0.489981	-0.124051	0.124051	0.634772	-0.634772	0.253172	-0.253172	-0.0222267	0.0222267	0.00304299	1
1219	OG0005654	467.622	527.716	67.1504	97.1222	83.6431	165.108	374.919	475.321	246.821	314.807	620.956	718.374	523.606	695.387	807.267	811.294	605.36	507.684	-0.388162	0.388162	-1.17301	1.17301	-2.10552	2.10552	-0.759195	0.759195	-0.778258	0.778258	-0.467633	0.467633	-0.906	0.906	-0.0159927	0.0159927	0.564193	-0.564193	0.00307921	1
69	OG0002911	165.019	121.173	78.7351	79.9704	323.762	307.581	261.516	214.685	320.289	266.437	173.412	184.983	326.913	211.918	394.556	352.165	290.346	242.493	1.41134	-1.41134	-0.0717046	0.0717046	0.23611	-0.23611	0.905948	-0.905948	0.845526	-0.845526	-0.297398	0.297398	1.966	-1.966	0.52298	-0.52298	0.827311	-0.827311	0.0034833	1
1195	OG0005610	1804.77	1037.77	1203.84	785.215	235.097	106.386	955.461	1001.33	448.015	418.602	579.095	352.16	1309.82	1335.41	571.205	533.737	619.678	481.509	1.35465	-1.35465	1.05663	-1.05663	1.89228	-1.89228	-0.117693	0.117693	0.170395	-0.170395	1.22341	-1.22341	-0.0485691	0.0485691	0.170237	-0.170237	0.629927	-0.629927	0.00364392	1
1183	OG0005582	271.139	243.142	211.414	133.822	405.211	441.994	198.615	210.345	144.85	103.608	448.478	271.618	287.843	209.419	153.121	126.354	459.793	471.629	0.375905	-0.375905	1.55195	-1.55195	-0.299795	0.299795	-0.198058	0.198058	1.14618	-1.14618	1.69595	-1.69595	1.08902	-1.08902	0.661361	-0.661361	-0.0877454	0.0877454	0.00376681	1
782	OG0004600	222.963	182.077	141.734	102.957	619.038	624.737	262.726	247.203	364.08	313.214	271.841	274.423	372.222	275.104	167.767	148.683	350.007	351.833	1.12803	-1.12803	1.77092	-1.77092	-0.0512017	0.0512017	0.340187	-0.340187	0.839246	-0.839246	-0.0528199	0.0528199	1.67657	-1.67657	0.673917	-0.673917	-0.0290674	0.0290674	0.00377908	1
346	OG0003556	579.639	658.623	361.202	393.239	469.316	618.782	425.74	446.44	1075.68	1065.45	623.707	617.681	562.941	620.847	383.019	390.978	501.158	637.36	-0.905699	0.905699	-0.602963	0.602963	-1.95043	1.95043	-0.336985	0.336985	0.0678504	-0.0678504	0.0689249	-0.0689249	-0.694548	0.694548	-0.146006	0.146006	-1.69862	1.69862	0.00409995	1
182	OG0003148	93.3262	257.337	114.948	588.837	3497.82	3291.31	99.065	191.46	334.886	635.005	341.048	592.899	693.977	1814.26	554.333	689.35	475.703	311.114	-1.24599	1.24599	-1.79378	1.79378	0.0810307	-0.0810307	-0.847223	0.847223	-0.824333	0.824333	-0.718379	0.718379	-1.18985	1.18985	-0.289208	0.289208	0.55726	-0.55726	0.00419957	1
591	OG0004159	258.703	279.854	194.056	162.597	484.551	505.231	181.838	161.114	163.093	160.454	239.464	239.446	123.985	119.267	229.015	192.571	233.874	218.65	-0.764028	0.764028	1.71603	-1.71603	-0.406489	0.406489	1.17561	-1.17561	0.158687	-0.158687	0.000734708	-0.000734708	0.377355	-0.377355	1.68175	-1.68175	0.654485	-0.654485	0.0042504	1
1054	OG0005264	852.287	757.314	1623.38	1409.23	1175.43	1042.32	411.485	343.944	1588.82	1309.1	248.847	293.155	432.181	326.926	1356.77	1299.53	398.548	237.265	0.496384	-0.496384	0.594079	-0.594079	0.504948	-0.504948	0.752173	-0.752173	0.812039	-0.812039	-0.687729	0.687729	1.16649	-1.16649	0.181261	-0.181261	2.13401	-2.13401	0.00438565	1
188	OG0003162	128.209	110.911	118.943	141.05	118.902	142.317	154.398	151.271	182.182	189.759	120.971	148.924	124.797	115.721	183.523	191.81	84.3219	108.747	0.946439	-0.946439	-1.11244	1.11244	-1.17272	1.17272	0.133844	-0.133844	-0.266545	0.266545	-1.35497	1.35497	0.493672	-0.493672	-0.288868	0.288868	-1.65512	1.65512	0.00454285	1
369	OG0003613	668.671	573.853	461.665	434.422	912.867	934.135	479.704	428.666	572.654	603.032	338.541	259.906	313.896	244.221	535.029	462.526	369.099	357.648	1.00419	-1.00419	0.40006	-0.40006	-0.15153	0.15153	0.739366	-0.739366	-0.340022	0.340022	1.72911	-1.72911	1.64279	-1.64279	0.956413	-0.956413	0.207341	-0.207341	0.00455107	1
7	OG0002766	140.822	118.795	486.514	293.896	488.322	377.128	929.126	789.272	412.079	340.113	1056.55	761.453	651.658	879.621	627.785	533.062	1350.74	1086.3	0.604678	-0.604678	1.75904	-1.75904	0.915682	-0.915682	0.580034	-0.580034	0.68187	-0.68187	1.15685	-1.15685	-1.06099	1.06099	0.581544	-0.581544	0.773346	-0.773346	0.00469586	1
1134	OG0005460	417.779	378.027	248.627	186.107	200.23	195.901	149.808	140.566	94.0383	77.8617	123.731	121.758	158.437	100.102	92.759	69.5185	122.505	135.497	0.444825	-0.444825	1.28067	-1.28067	0.0973146	-0.0973146	0.283404	-0.283404	0.838012	-0.838012	0.0715963	-0.0715963	2.0093	-2.0093	1.27534	-1.27534	-0.448417	0.448417	0.00507623	1
738	OG0004499	235.105	223.137	354.271	257.11	153.111	148.451	238.402	218.928	131.376	133.81	245.986	234.795	209.441	199.853	198.165	176.841	229.896	218.075	0.418557	-0.418557	2.5469	-2.5469	0.247645	-0.247645	0.682425	-0.682425	-0.147145	0.147145	0.373026	-0.373026	0.375435	-0.375435	0.911298	-0.911298	0.422926	-0.422926	0.00509935	1
226	OG0003248	134.501	154.955	180.758	117.716	173.83	135.307	852.612	767.562	339.939	340.444	322.442	332.955	408.839	318.407	348.843	322.218	360.349	363.458	-0.705788	0.705788	2.10964	-2.10964	1.24465	-1.24465	0.524326	-0.524326	-0.00742159	0.00742159	-0.160225	0.160225	1.24202	-1.24202	0.39628	-0.39628	-0.0429033	0.0429033	0.00510071	1
555	OG0004082	240.387	170.602	269.541	621.138	152.709	132.075	57.8294	95.0237	131.092	174.072	233.199	540.416	12913.2	15964.3	166.88	191.303	334.106	293.092	0.740647	-0.740647	-1.72187	1.72187	0.316045	-0.316045	-1.0614	1.0614	-0.614341	0.614341	-1.7322	1.7322	-0.460863	0.460863	-0.297423	0.297423	0.285231	-0.285231	0.00513255	1
655	OG0004311	366.217	339.516	653.471	594.452	711.092	617.995	688.225	652.239	358.749	395.807	617.267	510.431	730.337	701.07	593.076	572.751	910.048	710.051	0.576228	-0.576228	0.720297	-0.720297	1.06682	-1.06682	0.40888	-0.40888	-0.747991	0.747991	1.44289	-1.44289	0.311397	-0.311397	0.265524	-0.265524	1.88014	-1.88014	0.00525024	1
1101	OG0005372	751.361	797.488	812.438	630.583	709.44	686.852	537.371	591.047	525.489	490.537	360.619	325.467	616.118	519.328	289.375	273.005	409.677	378.583	-0.479625	0.479625	2.02962	-2.02962	0.260533	-0.260533	-0.766065	0.766065	0.554021	-0.554021	0.825144	-0.825144	1.37285	-1.37285	0.468794	-0.468794	0.635275	-0.635275	0.00526253	1
790	OG0004621	3527.45	3324.84	1068.37	1159.65	1240.12	1219.45	2107.85	1731.03	1671.35	1655.46	1596.09	1319.2	1877.92	1156.5	1896.68	1753.95	2339.53	1571.89	0.251088	-0.251088	-0.347896	0.347896	0.0713534	-0.0713534	0.833558	-0.833558	0.0405709	-0.0405709	0.806557	-0.806557	2.01892	-2.01892	0.33201	-0.33201	1.66661	-1.66661	0.00540592	1
520	OG0003993	1507.54	1837.07	1232	2155.78	242.565	248.965	1617.11	1991.56	1237.65	1736.58	505.964	1278.46	902.879	985.755	2020.28	2299.43	580.715	515.232	-0.507618	0.507618	-1.40488	1.40488	-0.0670882	0.0670882	-0.534601	0.534601	-0.864262	0.864262	-2.2304	2.2304	-0.226081	0.226081	-0.332939	0.332939	0.30784	-0.30784	0.00548076	1
377	OG0003627	1131.92	1099.89	990.759	847.643	1773.93	1619.51	552.594	569.939	735.469	749.579	1262.62	1151.08	1084.92	1028.71	1078.49	1075.25	1122.44	1041.52	0.368238	-0.368238	1.99758	-1.99758	1.16769	-1.16769	-0.396507	0.396507	-0.243795	0.243795	1.18571	-1.18571	0.682436	-0.682436	0.0385864	-0.0385864	0.959592	-0.959592	0.00548789	1
91	OG0002956	411.505	318.798	91.5342	65.475	264.25	249.578	189.821	212.163	254.605	213.149	286.1	209.325	448.188	356.392	171.984	152.738	245.814	259.364	1.19026	-1.19026	1.5562	-1.5562	0.267745	-0.267745	-0.52113	0.52113	0.83099	-0.83099	1.45302	-1.45302	1.06975	-1.06975	0.555721	-0.555721	-0.25148	0.25148	0.00549357	1
1154	OG0005502	124.239	134.547	426.823	689.732	716.651	739.109	1231.4	1307.31	1565.81	2379.29	250.213	414.439	412.648	420.287	892.524	1018.16	367.516	331.479	-0.282639	0.282639	-1.67091	1.67091	-0.109473	0.109473	-0.212193	0.212193	-1.46323	1.46323	-1.75337	1.75337	-0.0650827	0.0650827	-0.466625	0.466625	0.365846	-0.365846	0.00589963	1
676	OG0004362	1641.04	1079.53	973.781	795.925	832.991	792.645	1273.76	983.663	1875.15	1735.39	1952.57	1634.36	831.256	518.615	1226.84	1129.29	819.354	953.132	1.60677	-1.60677	0.782392	-0.782392	0.19321	-0.19321	1.00043	-1.00043	0.301341	-0.301341	0.690626	-0.690626	1.80307	-1.80307	0.322313	-0.322313	-0.587568	0.587568	0.00590683	1
890	OG0004874	94.0652	89.4445	222.13	273.547	1013.38	1083.45	416.687	466.446	946.553	969.534	1650.81	1581.79	1021.98	1005.1	559.881	625.923	1087.43	1147.38	0.516822	-0.516822	-2.12913	2.12913	-0.685883	0.685883	-1.15648	1.15648	-0.246179	0.246179	0.438271	-0.438271	0.170905	-0.170905	-1.14315	1.14315	-0.550579	0.550579	0.00606087	1
1075	OG0005305	535.305	480.748	778.471	731.323	517.635	542.941	446.843	406.451	274.536	235.649	369.809	317.975	268.858	207.3	325.325	295.837	376.274	404.747	0.798309	-0.798309	0.464283	-0.464283	-0.35475	0.35475	0.703776	-0.703776	1.13323	-1.13323	1.12049	-1.12049	1.92208	-1.92208	0.705792	-0.705792	-0.541998	0.541998	0.00644709	1
92	OG0002958	1140.62	1085.96	1359.83	1053.51	799.697	664.133	843.105	776.449	371.097	260.217	494.465	442.542	528.218	467.854	330.648	250.419	392.972	498.955	0.228915	-0.228915	1.18355	-1.18355	0.863552	-0.863552	0.383778	-0.383778	1.63774	-1.63774	0.516718	-0.516718	0.565098	-0.565098	1.28748	-1.28748	-1.10801	1.10801	0.00659747	1
257	OG0003305	156.737	180.757	314.372	265.73	375.656	333.026	205.702	216.503	268.363	246.01	357.399	345.604	300.868	303.498	324.432	320.696	346.038	308.212	-1.40106	1.40106	1.65066	-1.65066	1.18415	-1.18415	-0.503566	0.503566	0.855459	-0.855459	0.330289	-0.330289	-0.0856497	0.0856497	0.114013	-0.114013	1.13812	-1.13812	0.0066766	1
145	OG0003068	347.359	327.258	230.02	298.118	474.875	377.648	305.907	272.954	380.644	343.108	215.725	180.758	167.933	128.855	296.92	241.285	261.716	207.026	0.296446	-0.296446	-1.2829	1.2829	1.13472	-1.13472	0.566396	-0.566396	0.516016	-0.516016	0.877465	-0.877465	1.31005	-1.31005	1.0285	-1.0285	1.16087	-1.16087	0.00670102	1
859	OG0004801	910.191	755.144	898.237	653.354	718.934	613.188	591.009	554.289	452.501	445.542	780.11	671.072	647.312	504.412	462.907	404.679	779.58	917.077	1.00409	-1.00409	1.70214	-1.70214	0.856117	-0.856117	0.345779	-0.345779	0.083577	-0.083577	0.810345	-0.810345	1.33812	-1.33812	0.72383	-0.72383	-0.874004	0.874004	0.00709189	1
1173	OG0005547	277.515	228.359	430.258	419.794	314.74	265.71	305.493	332.736	293.346	224.103	257.582	242.579	349.43	261.611	205.712	174.557	303.869	313.446	1.11148	-1.11148	0.140802	-0.140802	0.96618	-0.96618	-0.488247	0.488247	1.53065	-1.53065	0.34312	-0.34312	1.64395	-1.64395	0.937127	-0.937127	-0.177456	0.177456	0.00730448	1
166	OG0003116	95.2469	41.9915	173.078	109.489	878.672	843.921	264.657	234.075	342.748	295.147	330.721	310.959	462.944	320.544	250.318	207.543	296.71	351.827	2.21496	-2.21496	1.28451	-1.28451	0.115151	-0.115151	0.35	-0.35	0.42594	-0.42594	0.175786	-0.175786	1.03742	-1.03742	0.533254	-0.533254	-0.485101	0.485101	0.0074589	1
150	OG0003077	27.2308	105.309	354.396	340.607	365.434	255.474	269.008	254.776	164.216	170.813	90.1536	71.6497	181.5	128.855	269.401	230.375	255.352	280.299	-2.61904	2.61904	0.0882065	-0.0882065	0.787352	-0.787352	0.120803	-0.120803	-0.0875377	0.0875377	0.508438	-0.508438	0.754156	-0.754156	0.347162	-0.347162	-0.207056	0.207056	0.00782559	1
802	OG0004653	412.678	387.522	338.975	203.519	172.598	160.408	379.833	408.167	223.163	229.728	293.924	280.047	374.39	264.454	142.243	132.44	423.996	298.908	0.256585	-0.256585	2.038	-2.038	0.298774	-0.298774	-0.293486	0.293486	-0.118318	0.118318	0.197334	-0.197334	1.40457	-1.40457	0.291283	-0.291283	1.41234	-1.41234	0.00799015	1
636	OG0004275	425.462	310.355	904.159	825.789	726.882	709.673	700.306	649.515	533.635	578.461	677.988	618.617	602.008	450.818	778.241	662.202	658.88	646.379	1.87753	-1.87753	0.543714	-0.543714	0.143782	-0.143782	0.451613	-0.451613	-0.483773	0.483773	0.549559	-0.549559	1.72353	-1.72353	0.96686	-0.96686	0.114947	-0.114947	0.00813237	1
871	OG0004826	294.044	270.635	220.344	164.6	241.86	208.14	209.568	195.6	173.199	154.536	241.488	216.349	192.349	143.409	212.593	173.799	178.19	222.727	0.428879	-0.428879	1.49813	-1.49813	0.775221	-0.775221	0.356636	-0.356636	0.589117	-0.589117	0.568043	-0.568043	1.50798	-1.50798	1.03872	-1.03872	-1.14927	1.14927	0.00813691	1
492	OG0003928	515.894	533.678	272.603	260.679	1243.17	1281.82	617.494	621.048	434.819	405.283	792.993	731.487	639.173	455.426	681.273	628.201	741.388	490.813	-0.180299	0.180299	0.237922	-0.237922	-0.162874	0.162874	-0.0305386	0.0305386	0.37411	-0.37411	0.429319	-0.429319	1.78626	-1.78626	0.431266	-0.431266	2.16389	-2.16389	0.00817219	1
1153	OG0005500	340.414	424.395	330.795	428.111	1360.5	1283.37	790.351	1045.16	872.737	1106.6	737.779	799.854	1251.22	1280.03	1064.73	1243.72	774.011	707.149	-1.18984	1.18984	-1.38951	1.38951	0.316118	-0.316118	-1.50426	1.50426	-1.28029	1.28029	-0.437449	0.437449	-0.1233	0.1233	-0.840159	0.840159	0.489149	-0.489149	0.00841157	1
236	OG0003261	83.7472	75.734	400.842	384.391	253.23	284.794	216.335	205.497	126.317	146.534	252.067	345.604	106.891	186.712	91.4275	92.3505	114.543	261.108	0.285532	-0.285532	0.119055	-0.119055	-0.333377	0.333377	0.146015	-0.146015	-0.421063	0.421063	-0.889361	0.889361	-1.54494	1.54494	-0.0285399	0.0285399	-2.21719	2.21719	0.00891749	1
418	OG0003732	52.5657	67.2969	1054.26	1502.3	986.997	1008.31	1546.8	1639.84	483.949	499.421	508.264	490.777	1651.66	2326.49	553.669	539.91	461.384	583.277	-1.19512	1.19512	-1.70421	1.70421	-0.103891	0.103891	-0.283936	0.283936	-0.152999	0.152999	0.170217	-0.170217	-1.64959	1.64959	0.122348	-0.122348	-1.13466	1.13466	0.00893956	1
989	OG0005109	1578.51	1377.75	1265.68	1315.59	1403.73	1312.08	697.648	722.019	1070.35	993.22	1461.42	1424.56	625.613	508.324	848.587	768.763	1264.02	1169.99	1.31678	-1.31678	-0.374913	0.374913	0.654366	-0.654366	-0.332865	0.332865	0.72478	-0.72478	0.247623	-0.247623	2.00568	-2.00568	0.957025	-0.957025	0.74917	-0.74917	0.00898527	1
1001	OG0005139	178.982	162.31	182.318	167.716	235.162	243.444	207.232	185.804	236.64	224.103	173.872	171.87	188.283	150.153	220.8	219.717	179.781	173.872	0.979292	-0.979292	0.836304	-0.836304	-0.346881	0.346881	1.09293	-1.09293	0.545472	-0.545472	0.11609	-0.11609	2.25857	-2.25857	0.0492937	-0.0492937	0.33491	-0.33491	0.00902504	1
654	OG0004309	354.325	342.092	221.029	217.841	486.334	472.023	443.7	428.869	407.871	384.853	419.946	396.653	511.395	404.317	424.963	381.337	479.672	500.112	0.366092	-0.366092	0.151394	-0.151394	0.311241	-0.311241	0.354268	-0.354268	0.605193	-0.605193	0.594516	-0.594516	2.43724	-2.43724	1.12773	-1.12773	-0.434818	0.434818	0.0090302	1
396	OG0003671	269.732	213.145	620.131	420.535	793.433	739.177	279.961	265.683	355.383	315.284	281.04	319.848	328.001	278.657	203.939	181.408	271.262	251.222	1.27587	-1.27587	2.08817	-2.08817	0.385422	-0.385422	0.284891	-0.284891	0.650965	-0.650965	-0.703148	0.703148	0.885549	-0.885549	0.636582	-0.636582	0.417585	-0.417585	0.0093951	1
996	OG0005124	354.577	355.215	790.211	472.949	688.081	622.982	581.83	488.448	378.854	415.742	676.152	594.261	670.377	490.927	522.495	460.416	628.437	680.963	-0.00794342	0.00794342	2.21848	-2.21848	0.438578	-0.438578	0.77066	-0.77066	-0.410056	0.410056	0.569362	-0.569362	1.36489	-1.36489	0.557869	-0.557869	-0.354325	0.354325	0.00960379	1
846	OG0004773	359.089	377.641	748.004	435.161	658.129	621.193	429.849	437.653	329.552	275.321	324.733	298.77	300.594	299.952	304.906	274.017	373.872	340.197	-0.249899	0.249899	2.62403	-2.62403	0.286519	-0.286519	-0.0892846	0.0892846	0.88976	-0.88976	0.41324	-0.41324	0.0106193	-0.0106193	0.529511	-0.529511	0.468019	-0.468019	0.00967869	1
355	OG0003577	179.421	161.077	419.769	301.427	132.065	169.007	271.484	235.256	183.304	157.796	206.539	179.827	351.603	272.257	226.572	180.139	213.191	203.542	0.523234	-0.523234	1.59367	-1.59367	-1.19169	1.19169	0.694346	-0.694346	0.726303	-0.726303	0.671475	-0.671475	1.23525	-1.23525	1.10878	-1.10878	0.224871	-0.224871	0.00976684	1
316	OG0003453	783.279	337.723	537.276	139.962	549.552	658.626	335.294	352.526	209.972	203.975	345.891	176.08	275.909	175.356	253.867	212.615	221.942	151.78	1.37552	-1.37552	2.03033	-2.03033	-0.312437	0.312437	-0.0867022	0.0867022	0.0501364	-0.0501364	1.12588	-1.12588	0.771142	-0.771142	0.306042	-0.306042	0.649717	-0.649717	0.00984323	1
857	OG0004799	11693.9	6333.05	137.412	238.415	447.061	443.603	58.4722	71.0881	200.885	235.521	325.657	347.941	180.955	306.345	262.521	285.939	419.231	366.953	1.73398	-1.73398	-1.56705	1.56705	0.0226407	-0.0226407	-0.567779	0.567779	-0.462772	0.462772	-0.192896	0.192896	-1.50037	1.50037	-0.248964	0.248964	0.387729	-0.387729	0.00994948	1
946	OG0005011	112.369	104.085	549.203	508.734	1053.79	931.117	430.654	411.096	910.959	794.091	723.529	695.432	813.891	741.182	947.995	963.534	739.01	796.705	0.880964	-0.880964	0.880573	-0.880573	1.42263	-1.42263	0.534851	-0.534851	1.5778	-1.5778	0.455804	-0.455804	1.07629	-1.07629	-0.187131	0.187131	-0.864825	0.864825	0.0099613	1
325	OG0003479	87.9162	130.561	258.181	183.059	389.925	419.017	226.321	224.783	689.708	613.397	134.311	123.162	148.942	128.149	213.923	198.661	280.816	273.908	-2.0014	2.0014	1.74567	-1.74567	-0.368746	0.368746	0.0349541	-0.0349541	0.600451	-0.600451	0.443955	-0.443955	0.769441	-0.769441	0.379293	-0.379293	0.127689	-0.127689	0.0100133	1
360	OG0003586	371.995	401.708	338.473	386.143	321.96	324.379	438.949	459.267	366.331	383.965	365.219	479.069	344.007	394.729	361.935	411.278	513.886	461.155	-0.58385	0.58385	-1.00014	1.00014	-0.056893	0.056893	-0.343888	0.343888	-0.357311	0.357311	-2.05008	2.05008	-1.04384	1.04384	-0.970175	0.970175	0.822185	-0.822185	0.0105848	1
456	OG0003831	50.1305	91.6165	304.821	293.546	142.473	86.2289	371.134	328.796	167.307	162.822	234.583	198.086	286.728	259.439	186.625	166.695	223.541	241.336	-2.10322	2.10322	0.135405	-0.135405	1.76728	-1.76728	0.434681	-0.434681	0.0976111	-0.0976111	0.60619	-0.60619	0.359061	-0.359061	0.405368	-0.405368	-0.275086	0.275086	0.0106926	1
815	OG0004679	178.698	189.703	123.876	124.288	221.103	217.118	205.944	192.674	139.23	137.366	138.91	141.426	269.129	248.839	169.984	158.571	163.075	163.411	-1.23733	1.23733	-0.0686663	0.0686663	0.376695	-0.376695	1.3789	-1.3789	0.279144	-0.279144	-0.371734	0.371734	1.62256	-1.62256	1.4389	-1.4389	-0.0425388	0.0425388	0.0107562	1
870	OG0004823	621.659	563.287	194.93	154.281	139.598	149.156	246.377	223.371	78.0405	75.4934	114.077	116.611	128.323	102.583	81.8853	80.1746	146.37	98.279	0.538827	-0.538827	1.27321	-1.27321	-0.362049	0.362049	0.535681	-0.535681	0.181466	-0.181466	-0.120171	0.120171	1.21932	-1.21932	0.115465	-0.115465	2.15014	-2.15014	0.0110424	1
327	OG0003487	450.198	307.351	166.521	107.789	459.813	97.3308	970.04	580.142	341.064	374.791	447.544	486.094	1130.77	951.684	341.966	269.699	237.064	204.124	0.710441	-0.710441	0.806669	-0.806669	2.45125	-2.45125	0.947624	-0.947624	-0.177507	0.177507	-0.155565	0.155565	0.323998	-0.323998	0.445136	-0.445136	0.2813	-0.2813	0.0111376	1
774	OG0004586	260.989	259.932	120.505	111.054	133.124	166.61	349.227	383.831	191.164	215.814	196.406	256.159	195.062	245.641	215.92	207.284	101.027	241.918	0.0126174	-0.0126174	0.253767	-0.253767	-0.694674	0.694674	-0.293523	0.293523	-0.376606	0.376606	-0.820974	0.820974	-0.713624	0.713624	0.126878	-0.126878	-2.55451	2.55451	0.0111907	1
436	OG0003769	505.449	545.144	478.147	413.222	378.13	468.314	785.281	854.507	346.956	411.796	563.281	866.891	408.516	447.265	191.953	183.184	144.779	252.967	-0.285555	0.285555	0.550479	-0.550479	-0.805219	0.805219	-0.319054	0.319054	-0.645835	0.645835	-1.60439	1.60439	-0.3422	0.3422	0.176674	-0.176674	-2.05567	2.05567	0.0112672	1
22	OG0002798	98.7019	78.1499	346.964	282.011	1441	1671.92	200.95	189.242	276.501	219.067	168.804	119.884	101.734	113.24	179.08	152.103	405.7	297.75	1.04178	-1.04178	0.925766	-0.925766	-0.665018	0.665018	0.268992	-0.268992	1.03895	-1.03895	1.51909	-1.51909	-0.479819	0.479819	0.730226	-0.730226	1.37569	-1.37569	0.0117382	1
412	OG0003712	39.2325	128.941	681.445	838.589	472.835	447.758	444.427	440.987	275.097	319.724	1007.8	1056.01	393.38	522.878	347.067	342.516	334.106	357.648	-2.73498	2.73498	-0.530059	0.530059	0.139664	-0.139664	0.019919	-0.019919	-0.384672	0.384672	-0.119758	0.119758	-0.724638	0.724638	0.0338429	-0.0338429	-0.174495	0.174495	0.0122416	1
225	OG0003246	261.301	328.713	190.561	286.319	328.616	292.867	537.452	645.072	630.475	849.93	356.475	490.781	355.67	401.122	706.125	824.076	366.729	305.886	-0.924582	0.924582	-1.62494	1.62494	0.465485	-0.465485	-0.736465	0.736465	-1.1996	1.1996	-1.28278	1.28278	-0.486011	0.486011	-0.623769	0.623769	0.731998	-0.731998	0.0124384	1
891	OG0004875	530.905	170.302	761.197	767.531	2252.71	2396.25	2793.82	3028.34	2559.52	2515.16	2527.06	2675.38	2712.97	3382.18	2611.24	2656.67	2836.56	2844.32	2.83305	-2.83305	-0.0228275	0.0228275	-0.170105	0.170105	-0.221907	0.221907	0.0481554	-0.0481554	-0.157056	0.157056	-0.604853	0.604853	-0.047517	0.047517	-0.00752303	0.00752303	0.0124789	1
892	OG0004880	111.723	111.082	617.822	772.633	1062.6	1017.8	348.179	281.03	892.659	1029.93	613.597	753.028	1024.7	1797.58	707.01	784.237	208.426	312.865	0.0211266	-0.0211266	-0.817725	0.817725	0.15816	-0.15816	0.783802	-0.783802	-0.524386	0.524386	-0.749329	0.749329	-2.01128	2.01128	-0.380348	0.380348	-1.47143	1.47143	0.0124888	1
31	OG0002814	313.767	335.981	209.042	281.052	320.649	372.593	362.678	341.015	304.01	290.712	262.641	290.813	311.178	373.431	277.611	390.217	265.693	250.641	-0.376852	0.376852	-1.61957	1.61957	-0.825907	0.825907	0.339328	-0.339328	0.246467	-0.246467	-0.561068	0.561068	-1.00231	1.00231	-1.85857	1.85857	0.321347	-0.321347	0.0127234	1
918	OG0004946	502.642	535.356	121.816	111.747	330.399	284.113	187.66	163.692	456.439	477.218	197.772	204.913	274.013	231.083	400.553	424.723	191.697	153.525	-0.496154	0.496154	0.678707	-0.678707	1.18579	-1.18579	1.07393	-1.07393	-0.350359	0.350359	-0.279178	0.279178	1.33802	-1.33802	-0.461067	0.461067	1.74075	-1.74075	0.0127855	1
1026	OG0005191	524.784	662.232	432.255	652.221	772.503	855.669	451.58	438.664	233.83	295.742	376.713	378.385	252.303	390.47	607.15	586.85	419.239	414.54	-0.984574	0.984574	-1.72466	1.72466	-0.43432	0.43432	0.123356	-0.123356	-0.994073	0.994073	-0.0188236	0.0188236	-1.82772	1.82772	0.14456	-0.14456	0.0479227	-0.0479227	0.013327	1
699	OG0004425	3669.38	2752.36	975.064	636.781	1769.4	1618.36	615.123	569.27	864.032	549.452	1819.17	1079.9	1346.71	1525.67	765.817	660.175	2283.85	2613.98	0.939442	-0.939442	1.3807	-1.3807	0.293295	-0.293295	0.254694	-0.254694	1.46414	-1.46414	1.67761	-1.67761	-0.409869	0.409869	0.487373	-0.487373	-0.443432	0.443432	0.0134812	1
211	OG0003210	125.646	57.9601	2896.59	955.617	215.796	153.297	129.913	112.899	234.675	180.289	335.772	292.686	161.967	115.366	305.352	282.641	159.893	208.77	1.53144	-1.53144	2.09314	-2.09314	0.703442	-0.703442	0.291099	-0.291099	0.544457	-0.544457	0.284801	-0.284801	0.698043	-0.698043	0.160458	-0.160458	-0.550759	0.550759	0.0135952	1
565	OG0004104	112.877	90.502	110.701	81.495	546.886	253.131	180.494	213.979	271.933	222.327	306.343	282.852	291.308	263.223	154.825	140.879	500.363	444.867	0.722425	-0.722425	0.997858	-0.997858	2.41115	-2.41115	-0.557409	0.557409	0.659055	-0.659055	0.261803	-0.261803	0.332574	-0.332574	0.309701	-0.309701	0.385535	-0.385535	0.0138355	1
608	OG0004209	226.68	257.042	135.391	91.3706	332.593	252.018	221.568	238.823	474.688	434.686	257.117	275.359	232.233	185.647	160.442	158.827	426.374	389.051	-0.648285	0.648285	2.00498	-2.00498	1.42351	-1.42351	-0.387078	0.387078	0.45433	-0.45433	-0.353835	0.353835	1.15141	-1.15141	0.0522466	-0.0522466	0.472739	-0.472739	0.014147	1
647	OG0004288	502.982	553.286	397.916	383.531	121.245	180.959	242.428	266.895	167.02	170.224	268.621	244.452	295.171	456.849	184.408	190.288	234.669	314.609	-0.41138	0.41138	0.159008	-0.159008	-1.70684	1.70684	-0.414943	0.414943	-0.0820441	0.0820441	0.406914	-0.406914	-1.85712	1.85712	-0.135542	0.135542	-1.25715	1.25715	0.0142684	1
1039	OG0005221	94.0433	105.94	191.496	287.147	997.462	900.203	425.66	450.782	441.278	473.959	774.125	716.492	463.104	613.037	529.703	591.164	585.48	737.965	-0.59354	0.59354	-1.99386	1.99386	0.511363	-0.511363	-0.285992	0.285992	-0.356263	0.356263	0.385768	-0.385768	-1.3901	1.3901	-0.547093	0.547093	-1.14957	1.14957	0.0144713	1
1161	OG0005518	492.605	303.613	285.526	225.81	252.899	178.067	192.011	171.467	163.09	149.794	143.974	118.479	216.495	181.036	96.9753	88.0399	155.12	201.798	1.83671	-1.83671	0.903681	-0.903681	1.34361	-1.34361	0.437364	-0.437364	0.328844	-0.328844	0.751676	-0.751676	0.690216	-0.690216	0.373714	-0.373714	-1.01196	1.01196	0.014821	1
1104	OG0005379	331.203	328.235	303.571	335.513	153.811	165.94	215.396	203.686	394.683	403.208	454.908	516.065	440.044	494.831	304.019	354.443	260.921	514.081	0.0371426	-0.0371426	-0.412441	0.412441	-0.313018	0.313018	0.230569	-0.230569	-0.0881671	0.0881671	-0.519757	0.519757	-0.483607	0.483607	-0.631931	0.631931	-2.6956	2.6956	0.0148416	1
867	OG0004818	196.552	208.984	821.242	955.346	981.298	842.773	228.897	279.517	296.709	386.629	788.844	752.565	327.727	368.106	803.766	840.055	1010.26	1245.64	-0.381317	0.381317	-0.938996	0.938996	0.9447	-0.9447	-1.23854	1.23854	-1.63693	1.63693	0.292787	-0.292787	-0.721881	0.721881	-0.27462	0.27462	-1.29794	1.29794	0.01486	1
159	OG0003099	18369.3	26613.6	668.83	651.17	381.369	320.165	441.769	323.445	280.992	270.288	791.14	846.22	658.712	477.086	302.243	267.925	297.505	319.837	-1.71299	1.71299	0.125048	-0.125048	0.815424	-0.815424	1.44523	-1.44523	0.181472	-0.181472	-0.314413	0.314413	1.4946	-1.4946	0.562561	-0.562561	-0.338104	0.338104	0.0149941	1
1100	OG0005366	1050.41	999.342	1248.31	1279.63	886.084	1255.7	1283.5	1313.06	738.217	783.229	785.05	799.17	686.926	704.269	779.134	800.224	749.192	825.294	0.392173	-0.392173	-0.194963	0.194963	-2.71627	2.71627	-0.17919	0.17919	-0.465667	0.465667	-0.14029	0.14029	-0.196209	0.196209	-0.210188	0.210188	-0.760776	0.760776	0.0150006	1
331	OG0003498	628.93	572.326	276.458	428.476	217.271	233.056	210.454	246.899	284.644	290.12	460.303	402.629	246.609	277.237	221.474	237.558	295.127	581.533	0.33102	-0.33102	-1.51492	1.51492	-0.246239	0.246239	-0.559789	0.559789	-0.0669298	0.0669298	0.469513	-0.469513	-0.41073	0.41073	-0.246139	0.246139	-2.29505	2.29505	0.0151606	1
1148	OG0005487	92.5809	139.628	218.658	252.923	303.393	367.003	607.847	520.558	60.3529	73.7142	368.434	392.902	152.469	151.573	250.094	262.851	162.28	227.961	-1.85651	1.85651	-0.665773	0.665773	-0.869434	0.869434	0.708815	-0.708815	-0.913205	0.913205	-0.29449	0.29449	0.0269933	-0.0269933	-0.227883	0.227883	-1.54223	1.54223	0.0152436	1
976	OG0005078	588.214	657.241	854.12	957.456	1656.01	1521.63	809.197	923.607	2124.59	2045.58	1425.91	1532.74	1188.55	1303.81	1753.77	1856.45	1170.17	1606.77	-0.790316	0.790316	-0.813391	0.813391	0.60299	-0.60299	-0.941492	0.941492	0.27018	-0.27018	-0.514866	0.514866	-0.659458	0.659458	-0.405543	0.405543	-2.24195	2.24195	0.0155673	1
535	OG0004039	288.382	230.408	426.074	524.187	425.809	461.091	719.234	756.151	572.087	563.061	648.094	773.629	694.246	690.066	514.613	531.03	680.939	658.295	1.77322	-1.77322	-1.63835	1.63835	-0.63125	0.63125	-0.397043	0.397043	0.126171	-0.126171	-1.40111	1.40111	0.0479123	-0.0479123	-0.249139	0.249139	0.268302	-0.268302	0.0157108	1
764	OG0004562	1322.18	831.379	213.158	453.349	180.766	272.875	948.485	670.076	430.892	504.75	259.877	249.598	173.63	339.35	326.654	325.773	216.373	364.615	1.01477	-1.01477	-1.60461	1.60461	-0.90408	0.90408	0.765898	-0.765898	-0.351483	0.351483	0.0898325	-0.0898325	-1.43844	1.43844	0.00601173	-0.00601173	-1.13611	1.13611	0.015794	1
988	OG0005106	206.262	176.091	398.664	457.626	234.779	212.899	311.775	260.533	168.427	138.843	224.464	237.427	221.921	186.715	231.898	209.317	310.241	183.764	0.703248	-0.703248	-0.613659	0.613659	0.435578	-0.435578	0.797953	-0.797953	0.858038	-0.858038	-0.250118	0.250118	0.767801	-0.767801	0.456107	-0.456107	2.28168	-2.28168	0.0158101	1
173	OG0003134	509.562	399.346	644.604	645.736	529.089	449.601	868.797	785.336	494.897	493.207	500.9	473.918	545.581	446.2	643.326	585.582	571.161	626.892	1.78953	-1.78953	-0.0129408	0.0129408	1.1986	-1.1986	0.744604	-0.744604	0.0252353	-0.0252353	0.408477	-0.408477	1.47877	-1.47877	0.69343	-0.69343	-0.686486	0.686486	0.0158382	1
1050	OG0005246	175.574	114.366	387.801	314.225	148.182	83.7159	259.021	251.545	155.231	141.804	185.367	178.89	186.381	211.209	149.568	129.396	229.101	198.303	1.59059	-1.59059	0.789684	-0.789684	2.09458	-2.09458	0.110318	-0.110318	0.340592	-0.340592	0.133976	-0.133976	-0.470505	0.470505	0.544851	-0.544851	0.542943	-0.542943	0.0158468	1
495	OG0003938	447.139	383.192	180.445	259.112	96.7963	151.051	180.735	163.792	243.377	274.729	1962.66	2984.36	195.608	183.521	267.403	247.121	161.484	186.09	0.595438	-0.595438	-1.3837	1.3837	-1.69247	1.69247	0.380204	-0.380204	-0.46786	0.46786	-1.59678	1.59678	0.246491	-0.246491	0.304781	-0.304781	-0.547342	0.547342	0.0163079	1
773	OG0004583	224.762	294.42	141.733	373.873	1994.49	1911.71	465.368	587.613	640.861	831.579	416.275	677.164	348.888	518.256	375.474	437.411	623.664	433.248	-0.630626	0.630626	-2.11617	2.11617	0.0996068	-0.0996068	-0.545671	0.545671	-0.6088	0.6088	-1.12145	1.12145	-0.91804	0.91804	-0.358129	0.358129	0.84681	-0.84681	0.0169432	1
110	OG0002995	1782.96	1084.06	535.465	305.606	396.828	417.943	524.565	264.797	538.123	437.249	910.736	509.977	1628.32	747.93	420.545	285.483	354.788	667.599	0.916896	-0.916896	1.02793	-1.02793	-0.097472	0.097472	1.23778	-1.23778	0.388995	-0.388995	1.06099	-1.06099	1.39354	-1.39354	0.719527	-0.719527	-1.15081	1.15081	0.0172577	1
603	OG0004199	654.131	564.03	691.121	498.546	386.7	454.379	526.577	532.175	265.272	253.707	294.379	263.188	150.027	121.756	280.492	264.12	490.809	339.609	0.732453	-0.732453	1.60298	-1.60298	-0.796837	0.796837	-0.0523604	0.0523604	0.220674	-0.220674	0.553965	-0.553965	1.03011	-1.03011	0.297694	-0.297694	1.80305	-1.80305	0.0175962	1
271	OG0003338	71.4991	89.2	348.277	332.944	268.624	369.039	860.037	956.083	270.608	265.253	323.817	409.766	495.931	483.121	391.898	405.694	308.65	341.36	-1.34434	1.34434	0.274708	-0.274708	-1.92193	1.92193	-0.645455	0.645455	0.121984	-0.121984	-1.42994	1.42994	0.159686	-0.159686	-0.211104	0.211104	-0.614165	0.614165	0.0177665	1
812	OG0004667	127.033	80.3041	138.017	127.855	603.602	535.868	614.162	544.596	515.38	469.805	389.593	382.595	623.714	587.472	308.171	275.496	432.746	497.216	2.47558	-2.47558	0.419842	-0.419842	0.652932	-0.652932	0.659429	-0.659429	0.508131	-0.508131	0.0995367	-0.0995367	0.328676	-0.328676	0.614906	-0.614906	-0.761477	0.761477	0.0187652	1
475	OG0003888	2618.02	3411.8	1213.04	2406.41	2089.69	2221.51	2086.02	2211	2453.41	3088.89	1203.28	1604.86	2091.97	2713.05	2099.29	2215.97	1883.72	1486.4	-0.874179	0.874179	-2.18947	2.18947	-0.203055	0.203055	-0.193141	0.193141	-0.761405	0.761405	-0.949651	0.949651	-0.858342	0.858342	-0.17956	0.17956	0.782896	-0.782896	0.0188679	1
1062	OG0005277	789.384	253.982	15.4833	236.692	878.56	1041.06	438.063	364.948	680.722	968.35	503.66	351.692	536.894	1691.44	100.306	164.662	256.935	352.409	1.23721	-1.23721	-2.11495	2.11495	-0.204093	0.204093	0.219527	-0.219527	-0.420525	0.420525	0.428358	-0.428358	-1.2492	1.2492	-0.585593	0.585593	-0.377764	0.377764	0.0194223	1
512	OG0003978	319.195	248.056	393.482	220.325	421.548	518.623	317.415	288.302	221.2	162.825	266.317	197.149	272.113	245.996	186.854	154.004	229.093	249.477	0.893908	-0.893908	2.01078	-2.01078	-0.735963	0.735963	0.342591	-0.342591	1.08348	-1.08348	1.06376	-1.06376	0.35931	-0.35931	0.686942	-0.686942	-0.303605	0.303605	0.0199993	1
656	OG0004312	297.674	358.357	271.978	358.634	329.214	326.62	469.957	483.501	482.256	587.043	275.981	384.473	164.135	204.106	485.101	506.927	306.255	254.711	-0.92525	0.92525	-1.37453	1.37453	0.0395617	-0.0395617	-0.142087	0.142087	-0.980228	0.980228	-1.64315	1.64315	-1.08576	1.08576	-0.220076	0.220076	0.9191	-0.9191	0.0201157	1
968	OG0005059	98.705	111.8	352.023	239.827	258.906	302.652	163.901	156.723	167.02	175.552	129.251	133.465	190.722	144.829	144.91	109.352	240.238	170.971	-0.537427	0.537427	1.63768	-1.63768	-0.672983	0.672983	0.193432	-0.193432	-0.215156	0.215156	-0.138575	0.138575	1.18155	-1.18155	1.20815	-1.20815	1.45522	-1.45522	0.0201606	1
960	OG0005038	368.509	337.994	1227.62	1039.5	2626.25	2523.05	810.326	827.038	1075.69	829.196	1314.13	985.768	1201.58	1039.36	973.743	870.755	1377.79	1659.11	0.50041	-0.50041	0.961366	-0.961366	0.232189	-0.232189	-0.118253	0.118253	1.4992	-1.4992	1.65413	-1.65413	0.83868	-0.83868	0.646901	-0.646901	-1.07326	1.07326	0.0208018	1
452	OG0003818	3221.85	3411.07	2586.29	3271.03	1976.05	1503.93	3952.56	2568.97	3559.03	3388.55	2063.88	1290.17	1887.51	2361.56	3988.3	2967.1	4010.05	1672.49	-0.143715	0.143715	-0.588927	0.588927	0.68346	-0.68346	1.06878	-1.06878	0.123621	-0.123621	1.1621	-1.1621	-0.562036	0.562036	0.739638	-0.739638	2.07229	-2.07229	0.0210089	1
824	OG0004699	1143.95	1032.75	1072.55	937.133	958.044	942.753	145.569	153.574	456.436	490.537	701.455	893.509	759.903	948.479	584.732	626.428	692.871	1157.26	0.470759	-0.470759	0.620942	-0.620942	0.074131	-0.074131	-0.2466	0.2466	-0.331831	0.331831	-1.1096	1.1096	-1.01718	1.01718	-0.317236	0.317236	-2.31298	2.31298	0.0210957	1
760	OG0004557	266.692	135.16	1407.85	1257.12	1140.59	1141.78	1724.79	1676.9	1651.42	1603.65	1563.43	1510.18	1565.65	1603.76	1781.06	1805.45	1712.69	1478.29	2.79423	-2.79423	0.482823	-0.482823	-0.00445501	0.00445501	0.120185	-0.120185	0.125285	-0.125285	0.147879	-0.147879	-0.102666	0.102666	-0.0580537	0.0580537	0.627085	-0.627085	0.0215501	1
864	OG0004810	326.66	343.48	360.699	361.198	82.9616	376.467	273.68	290.929	233.277	241.865	291.159	362.463	408.844	742.606	233.671	271.48	367.516	355.898	-0.102288	0.102288	-0.00281736	0.00281736	-2.6035	2.6035	-0.124503	0.124503	-0.0736659	0.0736659	-0.444574	0.444574	-1.18127	1.18127	-0.305027	0.305027	0.0654505	-0.0654505	0.0220969	1
860	OG0004803	461.844	462.03	742.259	665.281	631.668	830.092	621.133	524.499	799.463	634.419	1659.56	1482.63	1198.86	694.326	1127.31	799.46	1068.34	1073.51	-0.00153961	0.00153961	0.418826	-0.418826	-1.03955	1.03955	0.645974	-0.645974	0.881483	-0.881483	0.431219	-0.431219	2.04091	-2.04091	1.30308	-1.30308	-0.0184735	0.0184735	0.0224231	1
571	OG0004112	1056.55	1135.96	1365.32	1064.18	874.565	870.961	617.832	601.345	577.423	433.105	738.708	517.933	942.111	596.424	490.205	382.608	567.192	794.955	-0.262545	0.262545	0.898511	-0.898511	0.014967	-0.014967	0.0980283	-0.0980283	1.03524	-1.03524	1.27352	-1.27352	1.62871	-1.62871	0.893606	-0.893606	-1.21207	1.21207	0.0229229	1
237	OG0003262	481.255	599.576	719.406	501.029	1243.81	1119.96	679.85	637.496	806.483	608.66	927.755	1128.6	938.145	674.799	598.941	675.903	2568.64	1066.53	-0.605426	0.605426	0.989582	-0.989582	0.28976	-0.28976	0.177806	-0.177806	0.773099	-0.773099	-0.540157	0.540157	0.902953	-0.902953	-0.333866	0.333866	2.28525	-2.28525	0.0230559	1
506	OG0003963	391.948	303.017	187.561	192.507	263.298	271.062	148.599	150.057	263.304	280.055	317.916	288.261	268.313	344.323	301.615	326.953	274.452	350.658	1.63601	-1.63601	-0.166362	0.166362	-0.185753	0.185753	-0.0623828	0.0623828	-0.394122	0.394122	0.625444	-0.625444	-1.58623	1.58623	-0.515347	0.515347	-1.55858	1.55858	0.0231422	1
465	OG0003864	1197.73	1544.52	749.875	1039.23	301.773	289.664	540.853	607.582	907.25	915.654	921.853	1140.52	597.124	955.944	1256.09	1306.74	1437.4	1272.25	-1.08867	1.08867	-1.39233	1.39233	0.176257	-0.176257	-0.50021	0.50021	-0.0396892	0.0396892	-0.912753	0.912753	-1.98897	1.98897	-0.170129	0.170129	0.524689	-0.524689	0.0233098	1
158	OG0003098	361.284	355.945	595.278	556.279	237.743	290.558	627.769	628.979	304.288	347.845	446.173	487.04	657.35	615.171	325.624	344.211	395.358	501.857	0.11851	-0.11851	0.539184	-0.539184	-1.59162	1.59162	-0.0153305	0.0153305	-1.06337	1.06337	-0.69719	0.69719	0.527711	-0.527711	-0.441766	0.441766	-1.88978	1.88978	0.0234069	1
1012	OG0005159	919.246	865.76	607.019	446.96	164.551	131.025	265.463	321.729	419.105	389.88	461.338	425.515	302.496	227.896	404.764	396.306	664.234	642.593	0.332298	-0.332298	1.68415	-1.68415	1.25789	-1.25789	-1.06266	1.06266	0.40063	-0.40063	0.447973	-0.447973	1.55983	-1.55983	0.117095	-0.117095	0.183644	-0.183644	0.024045	1
672	OG0004357	2600.06	2565.04	980.772	713.822	1038.34	956.232	809.441	749.99	761.57	706.351	1054.25	1032.59	913.457	740.82	694.137	646.979	968.127	1132.7	0.0904319	-0.0904319	2.10076	-2.10076	0.548976	-0.548976	0.508399	-0.508399	0.501649	-0.501649	0.138367	-0.138367	1.39167	-1.39167	0.468926	-0.468926	-1.04466	1.04466	0.0241319	1
113	OG0002999	101.365	82.8435	149.85	99.9097	152.257	126.403	177.835	176.011	147.654	162.236	133.851	113.792	102.548	90.5215	89.4303	77.13	100.232	111.073	1.03987	-1.03987	2.06798	-2.06798	0.959558	-0.959558	0.0533152	-0.0533152	-0.48667	0.48667	0.837719	-0.837719	0.644212	-0.644212	0.763772	-0.763772	-0.530618	0.530618	0.0242688	1
843	OG0004767	544.918	625.913	1304.6	864.899	433.026	355.862	357.441	386.154	421.339	407.355	522.059	476.259	427.838	382.66	327.319	293.807	615.709	667.018	-0.779586	0.779586	2.28404	-2.28404	1.1023	-1.1023	-0.435149	0.435149	0.190168	-0.190168	0.517002	-0.517002	0.628168	-0.628168	0.608036	-0.608036	-0.450778	0.450778	0.0243034	1
553	OG0004076	78.3622	110.726	393.983	229.248	333.517	275.986	133.86	127.944	248.152	132.925	248.847	88.9814	183.671	90.163	181.217	101.824	129.665	307.043	-0.563491	0.563491	0.870224	-0.870224	0.310759	-0.310759	0.0743935	-0.0743935	0.995483	-0.995483	1.55795	-1.55795	1.12423	-1.12423	0.923479	-0.923479	-1.33723	1.33723	0.024513	1
1185	OG0005585	598.784	520.472	453.733	370.644	169.415	175.909	144.572	155.187	169.833	158.086	218.945	234.622	148.131	110.748	205.934	189.014	351.598	254.136	0.783902	-0.783902	1.12922	-1.12922	-0.210705	0.210705	-0.396715	0.396715	0.401359	-0.401359	-0.387259	0.387259	1.61786	-1.61786	0.47997	-0.47997	1.80269	-1.80269	0.0245171	1
2	OG0002758	771.321	1031.51	875.938	1075.89	610.874	574.375	336.243	308.195	791.886	728.258	585.543	564.304	481.278	314.505	1131.75	995.327	867.879	609.312	-1.24116	1.24116	-0.880986	0.880986	0.264829	-0.264829	0.374291	-0.374291	0.359964	-0.359964	0.15885	-0.15885	1.80227	-1.80227	0.551556	-0.551556	1.50531	-1.50531	0.0258671	1
549	OG0004067	313.683	291.355	273.116	253.103	322.147	297.033	313.789	301.834	348.082	281.233	423.17	390.566	255.016	245.641	456.472	389.71	337.295	393.116	0.619775	-0.619775	0.638728	-0.638728	0.681194	-0.681194	0.326128	-0.326128	1.784	-1.784	0.67292	-0.67292	0.314501	-0.314501	1.32506	-1.32506	-1.28349	1.28349	0.0261687	1
50	OG0002853	1542.37	1373.06	935.905	972.377	1272.23	1296.85	1445.15	1298.63	934.768	957.988	528.043	540.885	1185.75	877.942	623.349	529.759	700.826	607.114	0.836766	-0.836766	-0.275384	0.275384	-0.138063	0.138063	0.769454	-0.769454	-0.176757	0.176757	-0.173097	0.173097	2.14904	-2.14904	1.16943	-1.16943	1.03233	-1.03233	0.0267698	1
910	OG0004928	159.197	180.572	282.469	218.236	256.386	274.737	269.895	266.288	237.762	216.69	267.241	257.1	345.092	308.467	224.128	183.689	322.969	345.425	-0.937444	0.937444	1.91161	-1.91161	-0.514867	0.514867	0.100243	-0.100243	0.690953	-0.690953	0.288189	-0.288189	0.835057	-0.835057	1.47763	-1.47763	-0.500634	0.500634	0.0275712	1
889	OG0004872	649.629	479.022	720.344	547.045	407.657	511.385	469.449	444.318	574.338	387.224	370.84	378.465	302.496	237.122	515.769	426.471	368.312	350.088	1.28668	-1.28668	1.16391	-1.16391	-0.960716	0.960716	0.234104	-0.234104	1.65639	-1.65639	-0.08662	0.08662	1.03123	-1.03123	0.806708	-0.806708	0.215921	-0.215921	0.0277025	1
106	OG0002985	1245.9	1209.08	954.046	800.367	1228.82	1337.59	1179.69	1151.69	701.781	625.83	822.422	659.359	992.401	860.094	587.622	503.626	855.151	969.99	0.218088	-0.218088	1.27364	-1.27364	-0.61628	0.61628	0.174578	-0.174578	0.831809	-0.831809	1.60005	-1.60005	1.03846	-1.03846	1.11917	-1.11917	-0.914867	0.914867	0.0279632	1
937	OG0004990	231.688	282.995	832.607	892.264	1385.46	1248.68	601.804	629.52	615.041	578.461	879.035	849.147	1247.42	1167.15	767.714	729.422	1318.12	1143.1	-1.94226	1.94226	-0.673868	0.673868	1.01172	-1.01172	-0.438543	0.438543	0.597157	-0.597157	0.336958	-0.336958	0.64771	-0.64771	0.498328	-0.498328	1.38551	-1.38551	0.0282659	1
623	OG0004248	1648.6	1925.01	700.051	1550.8	1044.05	1063.84	551.144	748.779	1173.37	1256.4	538.622	1035.41	694.52	1290.68	830.393	948.395	1254.49	754.248	-0.344124	0.344124	-1.68159	1.68159	-0.041768	0.041768	-0.676414	0.676414	-0.152022	0.152022	-1.40418	1.40418	-1.33606	1.33606	-0.295142	0.295142	1.10795	-1.10795	0.0283183	1
1096	OG0005354	75.93	39.9126	77.7349	48.5835	366.508	345.81	70.3125	68.1626	178.249	110.127	271.841	275.828	180.958	156.898	116.725	110.872	283.194	325.664	1.94383	-1.94383	1.4428	-1.4428	0.181662	-0.181662	0.0970648	-0.0970648	1.47686	-1.47686	-0.0455125	0.0455125	0.445223	-0.445223	0.160793	-0.160793	-0.436091	0.436091	0.0305931	1
1199	OG0005623	265.99	322.884	179.633	399.421	254.64	268.335	346.892	344.65	292.779	410.014	355.555	498.274	199.135	280.78	474.669	545.746	370.714	255.293	-0.534558	0.534558	-2.10011	2.10011	-0.144894	0.144894	0.0179352	-0.0179352	-0.922967	0.922967	-0.924845	0.924845	-0.94129	0.94129	-0.385398	0.385398	1.02015	-1.02015	0.0306536	1
579	OG0004139	428.381	373.418	80.7956	101.259	3189.16	2963.09	981.881	1193.5	1850.79	1951.63	685.802	1005.77	702.108	857.265	1719.01	1915.31	2269.54	1850.43	0.674486	-0.674486	-1.10598	1.10598	0.361557	-0.361557	-0.95719	0.95719	-0.260938	0.260938	-1.86118	1.86118	-0.97903	0.97903	-0.531481	0.531481	1.00094	-1.00094	0.0307805	1
768	OG0004577	478.302	460.379	555.817	388.931	695.829	679.415	464.24	560.448	497.142	400.247	456.743	418.195	472.171	402.379	305.574	290.765	315.809	298.902	0.223811	-0.223811	2.07053	-2.07053	0.1399	-0.1399	-1.10052	1.10052	1.26561	-1.26561	0.51642	-0.51642	0.935399	-0.935399	0.291086	-0.291086	0.322392	-0.322392	0.0307889	1
606	OG0004206	131	144.548	375.064	231.076	310.511	352.921	322.111	287.349	161.97	158.382	305.418	221.978	269.127	221.858	161.108	141.574	196.486	223.308	-0.434486	0.434486	2.09909	-2.09909	-0.564875	0.564875	0.504003	-0.504003	0.0989836	-0.0989836	1.39803	-1.39803	0.850714	-0.850714	0.570258	-0.570258	-0.5646	0.5646	0.031366	1
349	OG0003563	606.249	578.239	416.585	268.733	235.465	136.756	306.22	362.121	339.043	333.179	216.185	187.315	202.287	237.43	194.614	162.952	572.752	453.095	0.173747	-0.173747	1.58514	-1.58514	1.94845	-1.94845	-0.614543	0.614543	0.0640914	-0.0640914	0.525699	-0.525699	-0.587218	0.587218	0.650594	-0.650594	0.857013	-0.857013	0.0315524	1
1157	OG0005512	290.293	311.391	298.951	521.184	272.251	291.244	196.118	186.614	519.597	482.84	208.825	243.515	365.979	471.41	626.678	571.12	194.099	243.081	-0.302522	0.302522	-2.33787	2.33787	-0.290805	0.290805	0.214241	-0.214241	0.316357	-0.316357	-0.661658	0.661658	-1.08627	1.08627	0.400185	-0.400185	-0.966641	0.966641	0.0315846	1
157	OG0003093	69.753	52.9056	341.721	312.31	235.33	205.564	325.87	276.79	218.955	187.983	316.458	302.989	205.374	153.355	420.742	373.979	206.835	265.76	1.43034	-1.43034	0.468299	-0.468299	0.703063	-0.703063	0.848091	-0.848091	0.792585	-0.792585	0.226427	-0.226427	1.5101	-1.5101	0.612765	-0.612765	-1.29843	1.29843	0.0317377	1
903	OG0004911	73.5478	59.4959	198.614	174.612	214.844	264.534	162.362	165.308	167.018	243.349	105.333	108.645	106.62	112.53	93.8686	90.3233	54.8808	84.3222	0.942311	-0.942311	0.573758	-0.573758	-0.924799	0.924799	-0.0802046	0.0802046	-1.65953	1.65953	-0.138122	0.138122	-0.240608	0.240608	0.171724	-0.171724	-1.88697	1.88697	0.0322445	1
734	OG0004492	310.206	246.315	288.026	288.541	728.082	671.395	323.934	426.039	569.558	637.672	243.318	441.601	259.36	277.943	631.558	671.843	312.619	308.52	0.956143	-0.956143	-0.0074313	0.0074313	0.337352	-0.337352	-1.13387	1.13387	-0.469908	0.469908	-2.41106	2.41106	-0.288052	0.288052	-0.257413	0.257413	0.05496	-0.05496	0.0323485	1
1159	OG0005514	1346.52	1281.74	2131.37	2578.02	2717.74	2486.54	1038.18	1136.55	1161.87	1364.46	1019.75	1504.17	936.517	908.722	1694.74	1857.98	1505.34	1419.49	0.293131	-0.293131	-1.12799	1.12799	0.52835	-0.52835	-0.537995	0.537995	-0.953744	0.953744	-2.28274	2.28274	0.17915	-0.17915	-0.546477	0.546477	0.349075	-0.349075	0.0325879	1
1085	OG0005331	1550.11	1516.03	1121.31	1518.18	1351.6	961.511	591.495	707.476	1975.36	2162.87	697.771	817.649	1238.81	1524.14	2425.33	2585.49	1050.9	1437.48	0.100831	-0.100831	-1.36407	1.36407	1.52995	-1.52995	-0.810026	0.810026	-0.411072	0.411072	-0.717657	0.717657	-0.936866	0.936866	-0.289982	0.289982	-1.4094	1.4094	0.0327278	1
644	OG0004284	614.752	589.835	418.957	460.606	282.123	258.074	367.751	366.463	368.855	359.687	292.075	277.701	355.67	302.44	419.191	412.039	287.172	254.711	0.481999	-0.481999	-1.10339	1.10339	1.03735	-1.03735	0.0408771	-0.0408771	0.293229	-0.293229	0.587845	-0.587845	1.88475	-1.88475	0.200482	-0.200482	1.39586	-1.39586	0.0334034	1
251	OG0003291	422.129	391.691	2044.52	4640.87	363.689	351.585	344.684	299.589	428.851	475.539	205.141	199.5	181.734	244.931	565.905	594.815	167.053	246.564	0.232595	-0.232595	-2.41518	2.41518	0.105238	-0.105238	0.435283	-0.435283	-0.321045	0.321045	0.0866985	-0.0866985	-0.921138	0.921138	-0.154889	0.154889	-1.19548	1.19548	0.0335462	1
247	OG0003283	235.626	239.612	219.218	156.853	222.121	221.901	280.284	269.925	172.632	168.746	104.873	127.85	563.481	385.138	175.534	153.248	130.46	109.91	-0.0838394	0.0838394	1.6578	-1.6578	0.00495164	-0.00495164	0.188224	-0.188224	0.113784	-0.113784	-0.98703	0.98703	1.87945	-1.87945	0.677642	-0.677642	0.854695	-0.854695	0.0336994	1
315	OG0003452	210.204	236.65	476.242	410.524	539.143	682.161	414.789	406.954	1022.5	854.084	266.781	245.852	684.485	487.377	297.581	283.402	352.41	284.369	-0.639403	0.639403	0.800669	-0.800669	-1.26514	1.26514	0.10301	-0.10301	0.969569	-0.969569	0.441081	-0.441081	1.81719	-1.81719	0.263666	-0.263666	1.15438	-1.15438	0.0336995	1
120	OG0003017	376.189	445.345	284.902	208.09	99.9983	133.587	305.331	249.223	253.766	193.019	173.408	154.07	250.136	133.825	223.465	184.199	161.484	183.764	-0.563844	0.563844	1.04363	-1.04363	-0.963168	0.963168	0.677705	-0.677705	0.910718	-0.910718	0.395528	-0.395528	2.02904	-2.02904	0.645169	-0.645169	-0.432253	0.432253	0.0338005	1
951	OG0005021	285.226	317.087	487.824	436.251	391.993	378.834	372.267	337.115	227.093	214.63	308.174	262.715	400.163	300.307	232.783	211.6	268.08	327.403	-0.701621	0.701621	0.740261	-0.740261	0.226432	-0.226432	0.657262	-0.657262	0.374229	-0.374229	1.05616	-1.05616	1.89083	-1.89083	0.632255	-0.632255	-1.32135	1.32135	0.0340078	1
875	OG0004831	1288.67	1314.32	856.709	851.745	1498.7	1581.65	1095.68	1020.42	863.473	955.907	1218.91	1002.62	1107.17	855.838	1198.1	1084.89	1447.8	1322.41	-0.153425	0.153425	0.0452485	-0.0452485	-0.419368	0.419368	0.55383	-0.55383	-0.791111	0.791111	1.51604	-1.51604	1.99365	-1.99365	0.772139	-0.772139	0.704813	-0.704813	0.0341841	1
197	OG0003184	174.011	59.471	621.941	100.911	1701.48	1356.46	351.771	315.757	658.546	363.538	1852.29	1357.13	994.034	679.417	156.889	233.925	1306.99	1439.3	1.46014	-1.46014	2.14537	-2.14537	0.335815	-0.335815	0.160584	-0.160584	0.859086	-0.859086	0.459209	-0.459209	0.559577	-0.559577	-0.586693	0.586693	-0.143396	0.143396	0.0343349	1
993	OG0005118	113.307	86.5651	289.708	308.217	335.296	245.514	618.88	537.423	631.317	635.011	597.056	533.069	586.547	583.944	254.091	216.165	595.026	630.916	1.61557	-1.61557	-0.373798	0.373798	1.86653	-1.86653	0.850621	-0.850621	-0.0352224	0.0352224	0.683678	-0.683678	0.0268517	-0.0268517	0.973845	-0.973845	-0.353498	0.353498	0.0346599	1
858	OG0004800	183.413	151.624	244.194	224.677	326.586	428.228	430.574	367.27	259.658	219.07	844.036	761.921	265.057	197.72	746.51	617.548	937.087	891.484	1.00541	-1.00541	0.441077	-0.441077	-1.42692	1.42692	0.840765	-0.840765	0.898402	-0.898402	0.541816	-0.541816	1.54188	-1.54188	1.00184	-1.00184	0.26427	-0.26427	0.0346742	1
538	OG0004045	677.583	608.7	759.688	488.079	735.475	572.752	599.791	593.872	953.298	915.065	1093.53	772.177	777.507	785.614	581.628	585.326	677.717	771.118	0.493661	-0.493661	2.00662	-2.00662	1.14663	-1.14663	0.0457087	-0.0457087	0.188638	-0.188638	1.58778	-1.58778	-0.0478108	0.0478108	-0.0292101	0.0292101	-0.594272	0.594272	0.0348779	1
53	OG0002862	220.144	206.346	97.5888	67.1728	139.276	96.4947	125.484	106.638	156.359	146.537	124.191	133.933	228.972	180.681	791.336	837.264	105.8	121.54	0.303488	-0.303488	1.73163	-1.73163	1.70206	-1.70206	0.761596	-0.761596	0.304161	-0.304161	-0.354025	0.354025	1.10576	-1.10576	-0.264528	0.264528	-0.649448	0.649448	0.035187	1
181	OG0003147	419.718	441.505	587.413	527.323	282.253	294.559	223.341	209.335	387.946	431.921	165.588	154.07	237.385	193.815	175.088	170.752	205.236	178.525	-0.471806	0.471806	1.00536	-1.00536	-0.397887	0.397887	0.603736	-0.603736	-1.00037	1.00037	0.672039	-0.672039	1.88454	-1.88454	0.233864	-0.233864	1.29819	-1.29819	0.0353862	1
176	OG0003138	471.757	320.431	722.715	498.678	258.775	345.387	491.638	408.789	379.802	283.018	748.827	552.128	867.065	609.129	321.548	277.82	518.651	628.055	1.28346	-1.28346	1.23242	-1.23242	-0.963204	0.963204	0.61821	-0.61821	0.981079	-0.981079	1.01586	-1.01586	1.17399	-1.17399	0.490178	-0.490178	-0.641026	0.641026	0.035637	1
1182	OG0005576	264.428	264.498	418.082	238.52	416.26	427.173	758.778	772.612	247.304	269.101	275.534	261.31	306.3	221.858	121.383	115.693	344.447	298.326	-0.00116412	0.00116412	2.41711	-2.41711	-0.114369	0.114369	-0.0798398	0.0798398	-0.373075	0.373075	0.234181	-0.234181	1.41312	-1.41312	0.212165	-0.212165	0.634193	-0.634193	0.0360606	1
52	OG0002858	804.445	663.828	491.135	704.069	638.021	1225.14	447.789	631.535	683.532	650.994	762.176	884.147	681.224	912.634	656.192	695.178	1074.71	739.128	0.580419	-0.580419	-1.07972	1.07972	-1.90978	1.90978	-1.03175	1.03175	0.147766	-0.147766	-0.449008	0.449008	-0.879919	0.879919	-0.174838	0.174838	1.12128	-1.12128	0.0360896	1
1191	OG0005600	918.447	1166.53	553.01	781.212	1300.52	1224.59	175.257	223.211	1125.94	1335.73	478.375	590.993	264.935	425.789	1111.11	1270.62	511.5	361.126	-0.852557	0.852557	-1.22551	1.22551	0.215461	-0.215461	-0.862293	0.862293	-0.610655	0.610655	-0.754573	0.754573	-1.6686	1.6686	-0.479858	0.479858	1.23472	-1.23472	0.0361832	1
733	OG0004489	1711.46	2065	1124.38	1340.44	1335.98	1247.98	760.148	895	585.286	675.568	1088.05	871.803	528.486	640.37	677.942	741.359	517.864	878.114	-0.790198	0.790198	-0.739921	0.739921	0.287483	-0.287483	-0.687705	0.687705	-0.604395	0.604395	0.931353	-0.931353	-0.807956	0.807956	-0.37715	0.37715	-2.17825	2.17825	0.0362903	1
74	OG0002918	1128.3	782.306	283.842	396.94	432.885	702.372	280.929	355.556	741.395	750.937	408.447	487.972	328.269	593.507	461.576	546.256	828.892	507.678	0.987209	-0.987209	-0.905654	0.905654	-1.29407	1.29407	-0.639186	0.639186	-0.0348585	0.0348585	-0.483624	0.483624	-1.56865	1.56865	-0.458044	0.458044	1.31014	-1.31014	0.0367626	1
727	OG0004481	43.5792	115.711	66.3088	141.18	287.108	349.912	137.887	126.328	89.5469	112.792	115.912	117.543	106.891	455.075	212.591	190.542	155.916	152.943	-1.5274	1.5274	-1.21713	1.21713	-0.33255	0.33255	0.147559	-0.147559	-0.387492	0.387492	-0.0235659	0.0235659	-2.08985	2.08985	0.184489	-0.184489	0.0324664	-0.0324664	0.0368772	1
931	OG0004978	990.639	1130.05	552.948	688.311	663.781	618.442	687.177	936.404	849.707	923.938	1004.56	1048.99	978.576	2150.42	1232.44	1245.94	1252.1	1153.77	-0.445353	0.445353	-0.73879	0.73879	0.239548	-0.239548	-1.03992	1.03992	-0.283528	0.283528	-0.146552	0.146552	-2.53715	2.53715	-0.0368974	0.0368974	0.276894	-0.276894	0.0374163	1
439	OG0003775	155.256	199.971	353.647	371.124	590.981	440.866	453.609	551.058	434.541	477.218	429.15	471.572	365.437	477.793	345.292	396.814	241.033	465.232	-0.877911	0.877911	-0.16818	0.16818	1.01463	-1.01463	-0.676473	0.676473	-0.326445	0.326445	-0.328471	0.328471	-0.92928	0.92928	-0.484195	0.484195	-2.21392	2.21392	0.0376544	1
39	OG0002833	458.368	446.668	133.617	191.722	1680.8	1056.17	284.391	372.016	397.487	469.817	723.989	945.026	486.707	680.127	803.764	828.894	628.437	812.773	0.0912656	-0.0912656	-1.2609	1.2609	1.6112	-1.6112	-0.942445	0.942445	-0.588771	0.588771	-0.934987	0.934987	-1.17029	1.17029	-0.10867	0.10867	-0.902994	0.902994	0.0383141	1
575	OG0004127	410.56	392.679	678.822	965.88	357.779	476.753	597.696	574.284	410.678	407.648	417.651	413.039	615.03	551.627	301.356	315.878	254.557	353.572	0.227001	-0.227001	-1.77978	1.77978	-1.45375	1.45375	0.203708	-0.203708	0.0377503	-0.0377503	0.0566082	-0.0566082	0.554181	-0.554181	-0.239918	0.239918	-1.66032	1.66032	0.0386014	1
1210	OG0005638	471.149	496.303	142.417	221.493	397.883	357.476	235.982	217.917	288.29	380.114	1137.9	1032.08	291.042	463.196	502.405	540.42	316.621	350.083	-0.210614	0.210614	-1.76022	1.76022	0.433336	-0.433336	0.32239	-0.32239	-1.11283	1.11283	0.395017	-0.395017	-1.84895	1.84895	-0.295295	0.295295	-0.406568	0.406568	0.0391501	1
1149	OG0005490	611.469	631.796	625.502	545.651	694.489	713.046	279.894	265.441	663.321	378.334	471.922	471.572	217.849	192.04	578.077	557.924	576.722	586.772	-0.163501	0.163501	0.68182	-0.68182	-0.13184	0.13184	0.265022	-0.265022	2.73594	-2.73594	0.00371358	-0.00371358	0.629659	-0.629659	0.177407	-0.177407	-0.0863808	0.0863808	0.0392708	1
1044	OG0005233	329.251	299.152	292.459	340.913	1096.69	998.156	136.115	125.318	152.423	177.032	172.943	204.173	274.824	317.7	877.221	866.447	271.214	292.569	0.790449	-0.790449	-1.26249	1.26249	0.776195	-0.776195	0.681517	-0.681517	-1.23268	1.23268	-1.36664	1.36664	-1.19417	1.19417	0.101968	-0.101968	-0.625083	0.625083	0.0392882	1
103	OG0002977	156.531	145.929	357.313	367.562	506.773	438.951	390.947	325.362	293.624	250.451	344.511	336.234	371.948	318.769	292.701	254.227	264.898	320.424	0.503012	-0.503012	-0.202906	0.202906	1.02914	-1.02914	1.31392	-1.31392	1.13874	-1.13874	0.174496	-0.174496	1.10487	-1.10487	1.0095	-1.0095	-1.36136	1.36136	0.0399025	1
43	OG0002840	196.431	133.925	556.07	284.143	355.534	334.801	554.928	545.805	450.463	373.66	430.99	310.95	574.837	485.205	353.503	276.044	338.075	484.998	1.1489	-1.1489	1.96522	-1.96522	0.182376	-0.182376	0.0503267	-0.0503267	0.565894	-0.565894	0.982435	-0.982435	0.513443	-0.513443	0.747118	-0.747118	-1.08393	1.08393	0.0400208	1
306	OG0003431	258.494	272.276	707.149	592.022	113.908	173.775	210.775	171.568	287.446	233.573	197.786	170.461	144.33	89.453	240.332	174.811	202.85	191.324	-0.189598	0.189598	0.647087	-0.647087	-1.51959	1.51959	0.748793	-0.748793	0.755025	-0.755025	0.54185	-0.54185	1.71406	-1.71406	1.15248	-1.15248	0.213514	-0.213514	0.0403522	1
641	OG0004281	292.763	278.905	438.436	279.617	128.76	140.819	258.779	267.5	168.43	149.202	331.632	231.339	349.973	300.307	161.995	127.873	288.763	350.083	0.207425	-0.207425	1.89261	-1.89261	-0.382789	0.382789	-0.141801	0.141801	0.51799	-0.51799	1.52439	-1.52439	0.653545	-0.653545	1.00727	-1.00727	-0.821332	0.821332	0.0404387	1
1111	OG0005400	1385.84	1112.82	1250.96	808.759	210.27	246.613	768.203	725.957	330.678	240.977	1701.87	1561.31	679.604	577.898	1620.09	1462.91	1182.09	1317.17	0.989268	-0.989268	1.94374	-1.94374	-0.720179	0.720179	0.255986	-0.255986	1.42065	-1.42065	0.389995	-0.389995	0.732254	-0.732254	0.461565	-0.461565	-0.48934	0.48934	0.0412203	1
593	OG0004162	85.0631	48.0174	200.361	176.354	192.547	151.892	328.689	292.543	422.47	465.678	353.255	352.633	579.77	477.434	189.734	201.454	233.078	228.536	2.42941	-2.42941	0.556158	-0.556158	1.03009	-1.03009	0.50779	-0.50779	-0.424574	0.424574	0.00768702	-0.00768702	0.844781	-0.844781	-0.26146	0.26146	0.0858696	-0.0858696	0.0413618	1
221	OG0003235	2149.38	2178.79	376.243	254.785	233.799	234.719	237.598	222.029	289.138	282.42	495.868	446.05	369.232	330.834	203.493	191.049	391.373	437.69	-0.0901176	0.0901176	2.55325	-2.55325	-0.026033	0.026033	0.449336	-0.449336	0.155922	-0.155922	0.701609	-0.701609	0.727592	-0.727592	0.418386	-0.418386	-0.741098	0.741098	0.0415361	1
900	OG0004902	197.753	214.483	88.0995	215.317	70.5738	147.887	241.221	241.85	374.194	391.955	119.592	96.4695	115.301	228.247	407.43	432.334	214.782	177.367	-0.179863	0.179863	-1.85823	1.85823	-1.56845	1.56845	-0.00577038	0.00577038	-0.102744	0.102744	0.474288	-0.474288	-1.45705	1.45705	-0.131435	0.131435	0.422846	-0.422846	0.0418964	1
230	OG0003253	1549.84	1155.99	430.755	657.489	1943.06	2174.49	1270.78	1550.57	1480.19	1287.19	1243.75	1484.03	2062.67	1975.06	2127.91	2456.74	2521.73	2360.44	1.36313	-1.36313	-1.95117	1.95117	-0.526367	0.526367	-0.928717	0.928717	0.653136	-0.653136	-0.824921	0.824921	0.203193	-0.203193	-0.671689	0.671689	0.309375	-0.309375	0.0422886	1
688	OG0004399	14.5243	100.209	52.6974	108.835	222.933	213.317	66.2041	89.3688	190.325	222.623	191.811	131.597	49.9186	87.6782	167.765	174.552	196.478	234.939	-2.39628	2.39628	-1.11511	1.11511	0.0707275	-0.0707275	-0.477768	0.477768	-0.250958	0.250958	0.597415	-0.597415	-0.880528	0.880528	-0.0636194	0.0636194	-0.286055	0.286055	0.0425124	1
792	OG0004628	2577.75	2589.37	1713.54	1405.09	3373.48	3570.83	2520.06	2004.69	1597.8	1372.74	2650.34	2488.07	2549.92	1797.15	2100.39	1804.43	2410.35	3115.27	-0.0228429	0.0228429	1.00506	-1.00506	-0.288807	0.288807	1.15746	-1.15746	0.769908	-0.769908	0.320912	-0.320912	1.75972	-1.75972	0.770194	-0.770194	-1.2964	1.2964	0.0439996	1
1000	OG0005136	616.988	235.889	435.494	209.82	113.726	173.989	275.854	236.397	433.98	353.177	227.684	164.836	131.848	137.729	250.536	191.052	276.83	222.145	1.96716	-1.96716	1.53957	-1.53957	-0.922102	0.922102	0.339099	-0.339099	0.451911	-0.451911	0.704878	-0.704878	-0.0960521	0.0960521	0.593025	-0.593025	0.482476	-0.482476	0.044457	1
539	OG0004046	859.851	1183.95	879.558	1487.11	1368.57	1399.91	1234.29	1530.68	2072.57	2922.65	2022.47	2449.19	1039.61	1016.28	2376.67	2580.3	1836.79	1387.54	-1.1488	1.1488	-1.85972	1.85972	-0.0820088	0.0820088	-0.776547	0.776547	-1.23284	1.23284	-0.691314	0.691314	0.0822028	-0.0822028	-0.297595	0.297595	1.00937	-1.00937	0.0446473	1
1139	OG0005467	113.485	92.7435	87.3509	190.678	413.31	460.221	235.905	274.669	517.632	563.662	139.835	227.588	152.198	185.651	715.665	822.297	330.924	215.161	0.558868	-0.558868	-2.06511	2.06511	-0.298414	0.298414	-0.421884	0.421884	-0.236547	0.236547	-1.32714	1.32714	-0.550213	0.550213	-0.385268	0.385268	1.17794	-1.17794	0.0448254	1
1131	OG0005455	366.373	336.419	391.111	239.045	605.413	724.581	740.654	739.088	679.321	614.294	648.094	642.032	700.763	613.751	611.147	551.33	735.024	613.528	0.424287	-0.424287	2.40224	-2.40224	-0.891946	0.891946	0.0105384	-0.0105384	0.500407	-0.500407	0.0467748	-0.0467748	0.658939	-0.658939	0.512234	-0.512234	0.896861	-0.896861	0.0450442	1
6	OG0002764	281.572	168.961	62.1261	19.547	1019.02	1050.69	363.322	355.053	390.753	319.428	370.274	388.224	233.587	276.523	338.415	271.98	922.768	569.32	1.12401	-1.12401	2.34442	-2.34442	-0.0688177	0.0688177	0.051769	-0.051769	0.451637	-0.451637	-0.106422	0.106422	-0.378516	0.378516	0.489448	-0.489448	1.06524	-1.06524	0.0456053	1
609	OG0004210	451.043	513.896	503.746	379.743	924.05	821.731	466.092	554.085	430.611	391.958	688.576	660.301	639.718	616.935	327.539	325.773	871.061	725.177	-0.883953	0.883953	1.90476	-1.90476	0.795379	-0.795379	-1.17054	1.17054	0.637702	-0.637702	0.284475	-0.284475	0.246041	-0.246041	0.0366903	-0.0366903	1.24028	-1.24028	0.0456113	1
424	OG0003744	231.585	228.335	736.365	409.459	1599.37	1452.3	873.551	955.185	668.376	457.975	1634.28	1389.44	1239.01	912.982	580.962	569.083	1486.77	1941.73	0.0502733	-0.0502733	2.03008	-2.03008	0.342931	-0.342931	-0.317635	0.317635	1.32917	-1.32917	0.576173	-0.576173	1.07802	-1.07802	0.0735009	-0.0735009	-0.94423	0.94423	0.0457622	1
309	OG0003437	368.578	331.508	814.872	782.3	340.5	256.3	979.785	885.915	1017.16	1040.48	967.767	920.675	1656.26	1142.68	836.165	752.781	658.657	787.959	0.580109	-0.580109	0.22342	-0.22342	1.54569	-1.54569	0.551219	-0.551219	-0.124165	0.124165	0.273204	-0.273204	2.01024	-2.01024	0.574921	-0.574921	-0.979241	0.979241	0.0463821	1
49	OG0002852	117.261	107.632	92.1586	65.1268	577.539	463.104	169.298	153.896	173.199	176.144	137.99	116.138	145.686	137.019	156.002	156.039	100.232	119.79	0.501162	-0.501162	2.01167	-2.01167	1.28714	-1.28714	0.557796	-0.557796	-0.0986904	0.0986904	1.0065	-1.0065	0.358847	-0.358847	-0.00138922	0.00138922	-1.04048	1.04048	0.0473292	1
339	OG0003533	220.765	220.658	73.0801	105.419	252.53	204.023	156.894	234.478	358.213	366.386	163.293	248.198	146.772	245.282	330.202	413.808	213.199	150.617	0.00146056	-0.00146056	-1.09788	1.09788	0.643845	-0.643845	-1.2013	1.2013	-0.0683549	0.0683549	-1.25038	1.25038	-1.52267	1.52267	-0.680967	0.680967	1.04241	-1.04241	0.0478127	1
1125	OG0005435	3761.18	3564.9	1580.91	2366.48	120.354	175.967	888.692	957.003	593.982	1063.38	759.866	883.674	700.722	829.279	1258.68	1591.06	1458.14	840.896	0.154518	-0.154518	-1.14775	1.14775	-1.08241	1.08241	-0.213453	0.213453	-1.6334	1.6334	-0.434451	0.434451	-0.484594	0.484594	-0.672676	0.672676	1.5484	-1.5484	0.0483891	1
302	OG0003424	180.319	176.577	713.537	414.005	307.612	310.269	168.331	153.188	153.268	147.132	170.648	156.412	221.921	166.482	156.891	133.963	157.507	198.303	0.0901532	-0.0901532	2.28424	-2.28424	-0.0369657	0.0369657	0.404984	-0.404984	0.175637	-0.175637	0.374284	-0.374284	1.22733	-1.22733	0.677854	-0.677854	-0.985887	0.985887	0.0485585	1
84	OG0002944	1815.14	1870.51	690.935	1448.54	919.448	827.9	412.613	456.337	890.851	999.715	565.259	641.246	317.903	450.481	1406.18	1390.75	1012.67	906.609	-0.105918	0.105918	-2.49635	2.49635	0.369354	-0.369354	-0.35473	0.35473	-0.405942	0.405942	-0.443998	0.443998	-1.21637	1.21637	0.0388961	-0.0388961	0.389558	-0.389558	0.048631	1
604	OG0004200	5030.51	5325.74	3118.36	3972.24	1528.29	1434.62	1186.24	1245.84	1234.01	1712.3	1760.08	2335.26	1154.91	979.727	2683.23	2899.73	1717.71	1722.5	-0.311405	0.311405	-1.31547	1.31547	0.345356	-0.345356	-0.267674	0.267674	-1.77331	1.77331	-1.53419	1.53419	0.896466	-0.896466	-0.423586	0.423586	-0.0152126	0.0152126	0.0493427	1
950	OG0005017	338.556	338.198	184.378	346.833	416.647	367.761	280.525	305.975	108.077	142.1	49.2165	111.455	73.7928	143.764	155.56	190.795	171.03	96.5344	0.00227899	-0.00227899	-1.31582	1.31582	0.268149	-0.268149	-0.186705	0.186705	-0.58514	0.58514	-1.66668	1.66668	-1.38382	1.38382	-0.437714	0.437714	1.19794	-1.19794	0.0494284	1
98	OG0002966	122.041	137.014	124.813	113.884	171.968	167.942	159.551	153.593	197.34	169.338	150.409	180.763	255.83	224.697	122.495	108.845	207.631	190.161	-0.976497	0.976497	0.773528	-0.773528	0.200079	-0.200079	0.321462	-0.321462	1.29017	-1.29017	-1.54849	1.54849	1.09458	-1.09458	0.996888	-0.996888	0.741951	-0.741951	0.0495809	1
19	OG0002790	284.712	221.698	520.854	401.117	255.709	228.118	784.311	712.829	432.012	391.363	454.443	422.873	583.56	438.746	439.387	466.591	287.967	350.083	1.35145	-1.35145	1.41051	-1.41051	0.619363	-0.619363	0.518566	-0.518566	0.536187	-0.536187	0.390827	-0.390827	1.5385	-1.5385	-0.326123	0.326123	-1.05733	1.05733	0.0502356	1
21	OG0002797	89.3474	65.5551	513.3	461.632	589.982	625.252	330.62	328.291	220.639	219.662	318.288	287.058	418.068	445.494	268.511	243.059	525.819	405.916	2.00332	-2.00332	0.691227	-0.691227	-0.378541	0.378541	0.0460998	-0.0460998	0.0289322	-0.0289322	0.672901	-0.672901	-0.414218	0.414218	0.64892	-0.64892	1.67845	-1.67845	0.0505071	1
204	OG0003198	3828.47	5029.99	2085.46	1927.43	4282.99	3724.45	1143.85	1819.08	2226.32	2234.22	2609.4	3712.21	2089.53	3397.09	1166.59	1529.91	5174.65	4338.81	-0.907554	0.907554	0.263505	-0.263505	0.466722	-0.466722	-1.52487	1.52487	-0.0118457	0.0118457	-1.16727	1.16727	-1.59461	1.59461	-0.901566	0.901566	0.587871	-0.587871	0.0510353	1
283	OG0003369	295.123	328.866	262.013	513.478	900.278	594.722	593.59	765.946	897.153	1097.42	547.817	919.26	414.544	573.284	1259.92	1498.95	611.731	495.431	-0.29559	0.29559	-1.77254	1.77254	1.11723	-1.11723	-0.692993	0.692993	-0.548857	0.548857	-1.38399	1.38399	-0.87841	0.87841	-0.473604	0.473604	0.574201	-0.574201	0.0513673	1
780	OG0004598	405.238	528.221	329.296	611.822	160.691	188.197	252.416	281.033	318.607	432.22	171.108	310.95	254.748	488.087	256.088	286.957	565.593	280.299	-0.57955	0.57955	-1.32055	1.32055	-0.346802	0.346802	-0.235975	0.235975	-0.665619	0.665619	-1.27608	1.27608	-1.38177	1.38177	-0.250046	0.250046	1.4836	-1.4836	0.0517268	1
1032	OG0005202	623.312	702.576	619.351	1005.67	135.747	196.897	342.622	348.488	553.843	691.549	291.624	236.954	313.074	295.692	277.831	260.801	192.508	250.635	-0.472796	0.472796	-1.88014	1.88014	-1.45384	1.45384	-0.067126	0.067126	-0.874468	0.874468	0.817969	-0.817969	0.225812	-0.225812	0.250047	-0.250047	-1.03736	1.03736	0.0518288	1
921	OG0004955	2931.02	3173.85	346.895	1059.69	1831.17	1746.65	714.721	915.603	1178.43	1417.15	499.529	566.173	555.562	934.94	834.831	931.142	1144.72	768.792	-0.185028	0.185028	-2.35719	2.35719	0.109886	-0.109886	-0.573144	0.573144	-0.427824	0.427824	-0.290882	0.290882	-1.18396	1.18396	-0.253681	0.253681	0.913835	-0.913835	0.0519514	1
80	OG0002930	752.793	734.031	496.567	427.326	145.554	131.356	386.921	370.401	313.56	270.883	310.938	330.15	407.615	326.827	302.022	289.748	338.879	390.197	0.203774	-0.203774	1.21024	-1.21024	0.827985	-0.827985	0.352263	-0.352263	1.17917	-1.17917	-0.483937	0.483937	1.77633	-1.77633	0.334937	-0.334937	-1.13665	1.13665	0.0520096	1
876	OG0004836	339.613	268.688	440.249	383.618	293.964	295.584	303.962	267.197	169.269	150.685	195.951	183.573	170.646	105.427	167.099	137.517	163.075	209.933	1.03473	-1.03473	0.610009	-0.610009	-0.0243872	0.0243872	0.571233	-0.571233	0.515462	-0.515462	0.289433	-0.289433	2.09649	-2.09649	0.861823	-0.861823	-1.11482	1.11482	0.0520153	1
1166	OG0005528	79.4629	90.797	537.712	395.677	639.977	637.049	306.942	343.539	208.852	193.315	350.495	274.423	447.911	335.449	219.249	209.063	377.062	427.426	-0.722471	0.722471	1.6515	-1.6515	0.0248823	-0.0248823	-0.610595	0.610595	0.419291	-0.419291	1.32115	-1.32115	1.55809	-1.55809	0.258092	-0.258092	-0.679439	0.679439	0.0520349	1
468	OG0003872	204.862	174.865	144.544	251.406	302.175	317.04	301.604	378.885	429.208	499.125	193.651	190.597	124.799	184.582	281.084	321.713	193.312	136.66	0.559167	-0.559167	-1.91038	1.91038	-0.169926	0.169926	-0.803871	0.803871	-0.533112	0.533112	0.0562503	-0.0562503	-1.36779	1.36779	-0.477093	0.477093	1.21527	-1.21527	0.0522873	1
869	OG0004820	425.658	324.919	102.835	106.31	1933.18	2146.86	825.144	783.417	1366.5	1323.31	973.756	849.962	880.635	757.156	964.873	951.442	1370.63	1196.08	2.03624	-2.03624	-0.252093	0.252093	-0.794574	0.794574	0.393561	-0.393561	0.243627	-0.243627	1.02984	-1.02984	1.14383	-1.14383	0.106336	-0.106336	1.0317	-1.0317	0.0530248	1
855	OG0004796	654.269	480.729	281.095	440.081	253.73	235.992	503.476	593.47	304.294	291.304	404.307	460.337	127.778	101.522	540.355	649.262	396.949	598.979	1.16133	-1.16133	-1.67444	1.67444	0.275104	-0.275104	-0.623131	0.623131	0.165651	-0.165651	-0.492196	0.492196	0.869714	-0.869714	-0.69535	0.69535	-1.54077	1.54077	0.0533299	1
1068	OG0005288	173.684	161.655	103.078	183.228	417.693	388.273	175.177	177.124	489.558	457.972	301.739	313.765	235.209	409.638	544.129	632.771	481.271	457.678	0.259844	-0.259844	-2.02789	2.02789	0.264418	-0.264418	-0.0400253	0.0400253	0.241472	-0.241472	-0.141534	0.141534	-1.95946	1.95946	-0.545596	0.545596	0.182021	-0.182021	0.0538724	1
202	OG0003192	1339.26	1282.35	365.323	392.544	1213.97	1097.56	825.38	1054.35	624.302	802.561	474.236	979.207	800.603	1641.75	974.407	1125.48	785.944	514.069	0.111362	-0.111362	-0.184263	0.184263	0.258345	-0.258345	-0.624903	0.624903	-0.640906	0.640906	-1.78235	1.78235	-1.7668	1.7668	-0.369086	0.369086	1.07287	-1.07287	0.0540524	1
469	OG0003873	257.621	183.898	247.003	165.035	1255.83	1025.98	545.09	592.226	516.789	347.552	951.213	731.482	878.465	729.82	498.859	439.441	756.439	1117.71	1.1336	-1.1336	1.35057	-1.35057	0.683859	-0.683859	-0.281373	0.281373	1.32928	-1.32928	0.886526	-0.886526	0.627471	-0.627471	0.429919	-0.429919	-1.30867	1.30867	0.0543932	1
765	OG0004563	467.108	401.463	570.492	457.712	483.93	539.441	319.667	301.429	312.993	191.835	473.767	327.341	414.544	286.818	221.024	166.948	382.63	582.114	0.483253	-0.483253	0.701344	-0.701344	-0.346836	0.346836	0.18776	-0.18776	1.53458	-1.53458	1.16871	-1.16871	1.16444	-1.16444	0.891207	-0.891207	-1.32213	1.32213	0.0544064	1
294	OG0003407	336.155	361.329	89.0979	98.9084	98.0799	230.519	210.132	218.929	94.319	98.8777	316.918	260.379	212.154	193.105	196.168	217.692	121.718	336.126	-0.166118	0.166118	-0.24017	0.24017	-1.85502	1.85502	-0.0943664	0.0943664	-0.108602	0.108602	0.450763	-0.450763	0.216343	-0.216343	-0.239373	0.239373	-2.15537	2.15537	0.0545819	1
971	OG0005064	605.345	627.881	412.214	443.564	456.84	520.198	487.441	438.568	363.799	402.912	333.017	330.15	398.538	471.048	420.522	386.158	288.763	362.295	-0.294128	0.294128	-0.589619	0.589619	-1.04373	1.04373	0.849473	-0.849473	-0.821074	0.821074	0.0695628	-0.0695628	-1.3421	1.3421	0.685659	-0.685659	-1.81783	1.81783	0.0547292	1
568	OG0004107	408.362	647.062	434.066	843.037	599.77	1296.06	465.69	559.334	844.941	1270.29	441.569	1028.38	725.448	1331.15	1510.88	1505.43	892.539	320.43	-0.734484	0.734484	-1.03997	1.03997	-1.19275	1.19275	-0.296692	0.296692	-0.653044	0.653044	-1.29645	1.29645	-0.956455	0.956455	0.00587168	-0.00587168	1.53174	-1.53174	0.0549068	1
1017	OG0005171	840.416	847.229	847.279	782.387	1559.91	1645.83	1594.72	1526.34	891.545	848.755	708.81	731.946	1308.74	1133.43	776.246	753.03	711.168	710.633	-0.123744	0.123744	1.22056	-1.22056	-0.821601	0.821601	0.671578	-0.671578	0.753676	-0.753676	-0.492225	0.492225	2.20043	-2.20043	0.465352	-0.465352	0.0115308	-0.0115308	0.0559353	1
312	OG0003443	891.84	981.91	537.212	474.169	203.198	215.908	297.1	239.073	216.566	221.258	169.268	157.334	174.175	151.577	334.998	286.348	635.588	81.7984	-0.176969	0.176969	0.229482	-0.229482	-0.111641	0.111641	0.39843	-0.39843	-0.0394544	0.0394544	0.134521	-0.134521	0.255401	-0.255401	0.288255	-0.288255	2.84198	-2.84198	0.0565391	1
629	OG0004257	1442.38	1003.66	503.622	678.255	595.378	583.294	320.068	343.54	764.242	763.433	673.388	580.226	642.431	843.773	757.846	717.459	742.987	1129.34	1.49367	-1.49367	-1.23049	1.23049	0.085375	-0.085375	-0.294552	0.294552	0.00440882	-0.00440882	0.61887	-0.61887	-1.12819	1.12819	0.227973	-0.227973	-1.71843	1.71843	0.0568594	1
1187	OG0005594	165.973	130.752	312.686	224.721	510.913	476.85	245.813	216.909	188.074	181.473	248.387	215.417	225.174	184.586	178.419	163.901	190.122	250.059	1.21224	-1.21224	1.67166	-1.67166	0.352191	-0.352191	0.637941	-0.637941	0.182414	-0.182414	0.725975	-0.725975	1.0116	-1.0116	0.433119	-0.433119	-1.3906	1.3906	0.0579142	1
942	OG0005002	282.545	195.109	153.597	300.582	495.417	637.574	283.587	392.205	683.813	629.676	517.468	577.407	516.278	1112.84	543.674	628.711	914.821	548.391	0.858345	-0.858345	-1.51752	1.51752	-0.58834	0.58834	-0.753662	0.753662	0.193264	-0.193264	-0.256704	0.256704	-1.71708	1.71708	-0.340114	0.340114	1.17428	-1.17428	0.0581114	1
966	OG0005050	327.415	286.304	165.524	162.868	359.637	134.559	312.907	349.6	319.166	260.51	377.178	392.439	769.938	680.478	525.045	490.702	492.416	427.421	0.402333	-0.402333	0.0485778	-0.0485778	2.7355	-2.7355	-0.332653	0.332653	0.607755	-0.607755	-0.119097	0.119097	0.370456	-0.370456	0.203075	-0.203075	0.424399	-0.424399	0.0585701	1
1188	OG0005595	349.173	317.737	277.91	233.122	401.855	402.496	202.159	206.91	399.174	318.244	295.299	206.993	276.72	257.706	337.527	299.896	385.812	476.269	0.52155	-0.52155	0.969696	-0.969696	-0.00880589	0.00880589	-0.128503	0.128503	1.24814	-1.24814	1.94519	-1.94519	0.393645	-0.393645	0.653197	-0.653197	-1.16096	1.16096	0.0585936	1
185	OG0003153	1141.16	1017.52	847.538	720.961	362.172	384.001	441.527	336.976	735.75	799.609	543.213	517.474	345.627	254.515	842.6	778.148	5908.9	354.735	0.181994	-0.181994	0.256416	-0.256416	-0.0929536	0.0929536	0.426719	-0.426719	-0.132157	0.132157	0.0771014	-0.0771014	0.482383	-0.482383	0.126355	-0.126355	2.8175	-2.8175	0.0590765	1
1021	OG0005177	514.494	522.119	416.397	386.622	427.774	435.753	314.514	279.719	456.72	490.244	235.959	236.022	334.509	307.406	207.709	202.469	291.945	280.88	-0.232389	0.232389	1.17147	-1.17147	-0.291901	0.291901	1.84999	-1.84999	-1.1185	1.1185	-0.00425784	0.00425784	1.334	-1.334	0.403647	-0.403647	0.610271	-0.610271	0.0592054	1
1158	OG0005513	85.0475	81.1278	582.357	495.719	403.732	381.517	517.236	485.218	898.383	1001.56	256.63	278.385	360.828	316.639	370.592	362.311	274.444	194.813	0.318509	-0.318509	1.08518	-1.08518	0.382016	-0.382016	0.431294	-0.431294	-0.733285	0.733285	-0.549078	0.549078	0.880776	-0.880776	0.152583	-0.152583	2.29145	-2.29145	0.0594022	1
896	OG0004891	218.03	177.506	203.11	189.196	305.003	289.902	360.341	362.522	265.834	245.122	195.946	216.822	282.149	185.296	221.69	202.718	206.032	202.955	1.20357	-1.20357	0.416622	-0.416622	0.298189	-0.298189	-0.0354485	0.0354485	0.476178	-0.476178	-0.594124	0.594124	2.434	-2.434	0.525134	-0.525134	0.0883781	-0.0883781	0.0595747	1
1217	OG0005652	122.942	64.5854	166.209	137.959	310.007	215.096	608.086	502.787	254.889	211.08	600.708	364.331	306.297	301.02	109.4	91.0845	364.334	582.114	1.72283	-1.72283	0.514187	-0.514187	1.00066	-1.00066	0.524779	-0.524779	0.520496	-0.520496	1.35605	-1.35605	0.048103	-0.048103	0.505776	-0.505776	-1.2739	1.2739	0.0596073	1
136	OG0003052	5382.59	4882.06	1892.36	2569.75	11166.4	11326.7	16353.2	12822	7824.26	7474.14	3841.65	3192.86	6790.29	5385.64	10170.3	9216.54	6591.43	2745.68	0.293562	-0.293562	-0.913929	0.913929	-0.0428975	0.0428975	0.728642	-0.728642	0.137781	-0.137781	0.555241	-0.555241	0.694511	-0.694511	0.296179	-0.296179	2.47961	-2.47961	0.060098	1
239	OG0003266	118.589	128.832	333.042	265.251	926.576	948.426	684.602	753.224	676.795	579.349	619.121	679.515	709.436	588.541	638.881	655.864	928.36	601.776	-0.427919	0.427919	1.17126	-1.17126	-0.120461	0.120461	-0.493343	0.493343	0.801894	-0.801894	-0.480728	0.480728	0.9628	-0.9628	-0.135589	0.135589	2.20627	-2.20627	0.0601201	1
1080	OG0005317	616.458	271.326	124.437	41.0087	196.58	189.801	355.349	179.307	758.763	330.382	746.527	387.751	1276.18	166.127	64.5252	89.0725	175.016	540.837	0.882916	-0.882916	1.14525	-1.14525	0.0398468	-0.0398468	0.747796	-0.747796	0.893278	-0.893278	0.718367	-0.718367	1.74795	-1.74795	-0.362962	0.362962	-1.16061	1.16061	0.0601445	1
709	OG0004444	395.384	335.064	111.451	75.4442	276.452	349.733	291.076	279.515	309.905	285.383	253.902	214.949	169.287	147.314	179.305	173.796	221.146	201.792	0.886281	-0.886281	2.06764	-2.06764	-1.25598	1.25598	0.217451	-0.217451	0.442098	-0.442098	0.891666	-0.891666	0.744858	-0.744858	0.16742	-0.16742	0.491128	-0.491128	0.0602359	1
1093	OG0005350	355.703	349.387	57.4707	47.887	323.757	324.768	144.099	136.774	143.399	123.748	182.961	154.112	132.748	99.6088	249.693	230.317	180.576	233.195	0.106687	-0.106687	1.08345	-1.08345	-0.0185606	0.0185606	0.310635	-0.310635	0.876121	-0.876121	1.0194	-1.0194	1.69875	-1.69875	0.480783	-0.480783	-1.51467	1.51467	0.0613436	1
841	OG0004756	163.294	187.838	289.523	219.801	152.546	135.201	202.561	170.456	116.214	98.8777	169.273	138.612	175.803	152.638	133.593	114.934	117.732	174.46	-0.646435	0.646435	1.26598	-1.26598	0.557475	-0.557475	0.795974	-0.795974	0.745411	-0.745411	0.920982	-0.920982	0.652268	-0.652268	0.694334	-0.694334	-1.79546	1.79546	0.0616181	1
619	OG0004240	166.129	112.512	307.441	232.602	275.938	231.442	199.339	181.867	161.409	172.595	155.924	166.714	177.699	171.097	191.732	213.884	247.389	152.356	1.56731	-1.56731	1.12876	-1.12876	0.714301	-0.714301	0.373318	-0.373318	-0.272782	0.272782	-0.272393	0.272393	0.154189	-0.154189	-0.444834	0.444834	1.93639	-1.93639	0.0617087	1
795	OG0004634	275.641	227.448	353.301	404.563	783.673	735.741	1237.35	1263.18	1039.47	1124.95	1289.29	1229.75	1612.31	2162.85	1565.14	1573.81	1314.15	1370.09	1.42005	-1.42005	-1.0027	1.0027	0.467646	-0.467646	-0.153099	0.153099	-0.585418	0.585418	0.350366	-0.350366	-2.16179	2.16179	-0.0409253	0.0409253	-0.308946	0.308946	0.0617679	1
597	OG0004170	215.539	207.857	79.2946	60.4678	901.889	879.36	472.834	468.618	810.882	788.537	1227.65	990.938	953.372	1079.47	769.343	676.161	1493.26	1529.45	0.270003	-0.270003	2.00467	-2.00467	0.188222	-0.188222	0.0666457	-0.0666457	0.207907	-0.207907	1.58781	-1.58781	-0.923104	0.923104	0.959327	-0.959327	-0.178189	0.178189	0.0619761	1
849	OG0004781	2330.25	2624.79	816.872	1397.91	9658.74	9055.62	774.322	1057.48	2545.85	2803.29	1772.7	2758.27	2857.29	3323.96	4201.23	4544.83	2654.53	1823.1	-0.399014	0.399014	-1.761	1.761	0.21633	-0.21633	-1.03761	1.03761	-0.323056	0.323056	-1.46011	1.46011	-0.506778	0.506778	-0.263711	0.263711	1.24642	-1.24642	0.0622567	1
344	OG0003554	260.945	241.777	178.008	137.132	234.579	235.963	172.676	167.406	128.285	123.748	171.563	165.778	194.791	174.643	102.745	76.3714	147.158	173.297	0.494902	-0.494902	1.68357	-1.68357	-0.0381858	0.0381858	0.201139	-0.201139	0.233655	-0.233655	0.222613	-0.222613	0.707892	-0.707892	1.91117	-1.91117	-1.05874	1.05874	0.0627506	1
77	OG0002924	1227.85	1118.04	617.196	546.301	597.581	564.654	738.322	726.563	814.908	830.093	564.38	619.1	697.081	584.561	723.432	751.252	458.997	327.397	0.642908	-0.642908	0.836853	-0.836853	0.389105	-0.389105	0.110245	-0.110245	-0.126781	0.126781	-0.635014	0.635014	1.20577	-1.20577	-0.259096	0.259096	2.29836	-2.29836	0.0630696	1
308	OG0003436	275.707	278.056	96.2801	130.948	705.552	584.913	200.305	217.01	233.271	258.74	390.968	458.459	269.395	361.717	529.927	542.067	566.404	519.303	-0.0481313	0.0481313	-1.73092	1.73092	1.06059	-1.06059	-0.454121	0.454121	-0.587273	0.587273	-0.901429	0.901429	-1.65961	1.65961	-0.128478	0.128478	0.492189	-0.492189	0.0635511	1
443	OG0003789	70.4015	85.5461	332.731	189.764	153.433	132.469	188.628	169.445	231.025	216.995	211.585	177.017	295.711	231.438	230.566	218.199	164.674	233.782	-0.73809	0.73809	2.07964	-2.07964	0.557299	-0.557299	0.407176	-0.407176	0.238014	-0.238014	0.676091	-0.676091	0.926666	-0.926666	0.209444	-0.209444	-1.31819	1.31819	0.0640375	1
763	OG0004561	400.071	243.295	589.662	246.706	654.796	658.261	482.602	531.767	519.319	304.33	824.267	564.295	669.444	569.99	417.078	298.722	644.346	1058.96	1.08837	-1.08837	1.83145	-1.83145	-0.0117853	0.0117853	-0.216478	0.216478	1.16581	-1.16581	0.836212	-0.836212	0.35839	-0.35839	0.73851	-0.73851	-1.0872	1.0872	0.0645579	1
626	OG0004253	1330.03	1301.6	896.5	1310.06	1258.66	1387.63	997.584	1087.88	1885.53	2208.47	959.952	1228.82	975.619	1165.26	2025.16	2052.83	1323.69	950.8	0.101875	-0.101875	-1.76749	1.76749	-0.459603	0.459603	-0.408302	0.408302	-0.743887	0.743887	-1.15845	1.15845	-0.835348	0.835348	-0.0639734	0.0639734	1.54609	-1.54609	0.0648139	1
915	OG0004940	51.1501	64.9782	591.534	509.694	788.065	780.707	190.883	207.213	332.079	460.048	256.662	533.865	139.916	1129.74	948.226	1123.97	260.125	192.476	-0.386269	0.386269	0.241077	-0.241077	0.0152148	-0.0152148	-0.133069	0.133069	-0.524052	0.524052	-1.13748	1.13748	-2.52893	2.52893	-0.275111	0.275111	0.484856	-0.484856	0.0649343	1
97	OG0002965	265.688	246.016	831.98	688.875	509.784	545.517	756.143	725.202	441.553	314.398	637.966	576.012	701.842	506.897	363.709	335.16	571.965	725.171	0.38572	-0.38572	0.944052	-0.944052	-0.339722	0.339722	0.209562	-0.209562	1.6876	-1.6876	0.512023	-0.512023	1.61812	-1.61812	0.409837	-0.409837	-1.18501	1.18501	0.0650238	1
953	OG0005023	292.906	271.676	438.063	334.861	770.874	847.624	349.871	332.634	364.085	375.377	269.076	241.178	468.801	547.009	289.37	234.945	984.013	638.529	0.370858	-0.370858	1.31682	-1.31682	-0.46767	0.46767	0.249084	-0.249084	-0.150596	0.150596	0.539213	-0.539213	-0.759295	0.759295	1.02373	-1.02373	2.09993	-2.09993	0.0656464	1
645	OG0004286	122.908	139.757	476.774	318.796	182.843	189.169	207.958	177.929	156.07	124.929	126.951	122.685	174.173	128.851	129.82	130.157	129.665	166.318	-0.590907	0.590907	1.82919	-1.82919	-0.156638	0.156638	0.716837	-0.716837	1.02085	-1.02085	0.157427	-0.157427	1.37773	-1.37773	-0.0119219	0.0119219	-1.14075	1.14075	0.0664119	1
998	OG0005128	236.112	178.841	196.99	146.796	315.113	333.308	152.464	149.15	431.734	391.659	303.772	232.196	201.297	149.802	616.024	633.024	301.483	359.998	1.33392	-1.33392	1.41108	-1.41108	-0.271201	0.271201	0.106189	-0.106189	0.470386	-0.470386	1.29067	-1.29067	1.41751	-1.41751	-0.131543	0.131543	-0.854953	0.854953	0.0669339	1
873	OG0004829	298.045	225.844	287.274	179.837	169.438	145.107	131.041	141.172	165.336	163.119	170.188	164.775	103.692	108.263	163.549	130.411	133.642	140.149	1.31539	-1.31539	2.19524	-2.19524	0.738298	-0.738298	-0.355212	0.355212	0.0644399	-0.0644399	0.154225	-0.154225	-0.205817	0.205817	1.07595	-1.07595	-0.226839	0.226839	0.0678728	1
852	OG0004787	159.889	197.957	75.5495	154.283	171.59	138.224	117.752	129.66	284.083	302.255	105.793	196.217	104.449	201.269	272.947	321.97	326.827	214.591	-0.500984	0.500984	-1.6133	1.6133	0.507187	-0.507187	-0.226671	0.226671	-0.145958	0.145958	-1.41004	1.41004	-1.49146	1.49146	-0.388071	0.388071	0.976259	-0.976259	0.0683291	1
770	OG0004579	121.789	120.754	225.773	166.907	206.522	219.612	618.8	728.785	265.836	218.179	1345.4	860.728	338.581	275.455	248.543	239.76	422.389	471.623	0.0389512	-0.0389512	1.3686	-1.3686	-0.280437	0.280437	-0.745118	0.745118	0.898916	-0.898916	2.00571	-2.00571	0.938568	-0.938568	0.16421	-0.16421	-0.502772	0.502772	0.0684345	1
1122	OG0005421	243.343	147.663	212.427	228.203	1907.3	1757.16	898.115	839.762	1605.93	1467.76	2306.73	2546.14	1679.67	1359.2	4150.17	4289.07	1428.7	1120.6	2.32175	-2.32175	-0.339711	0.339711	0.388733	-0.388733	0.318579	-0.318579	0.426504	-0.426504	-0.46809	0.46809	1.0006	-1.0006	-0.156162	0.156162	1.14669	-1.14669	0.0698286	1
551	OG0004074	235.436	240.163	217.594	163.208	126.972	138.083	147.149	150.362	126.039	122.268	63.9355	74.9277	110.689	101.167	140.694	114.17	124.096	82.5776	-0.101149	0.101149	1.45343	-1.45343	-0.42659	0.42659	-0.109897	0.109897	0.154572	-0.154572	-0.805571	0.805571	0.457396	-0.457396	1.05909	-1.05909	2.04439	-2.04439	0.0699864	1
511	OG0003977	96.7156	104.256	211.852	171.088	185.266	196.523	510.715	440.584	467.659	376.863	562.545	461.742	515.176	330.831	552.114	457.703	477.286	704.242	-0.299484	0.299484	0.849693	-0.849693	-0.235365	0.235365	0.588454	-0.588454	0.85818	-0.85818	0.785547	-0.785547	1.73932	-1.73932	0.746274	-0.746274	-1.53327	1.53327	0.0708258	1
962	OG0005043	68.1347	72.5774	97.2766	120.893	327.66	386.105	1176.06	1199.36	323.66	347.253	223.084	269.74	276.18	279.012	292.699	280.104	263.307	228.542	-0.490495	0.490495	-1.68164	1.68164	-1.27208	1.27208	-0.152357	0.152357	-0.5463	0.5463	-1.47071	1.47071	-0.0792317	0.0792317	0.3416	-0.3416	1.09805	-1.09805	0.0709902	1
337	OG0003531	96.0015	56.1133	48.2743	51.2391	1291.69	1774.28	1500.89	1577.84	620.369	618.133	1445.68	1285.94	786.761	563.341	286.929	744.657	557.638	1509.08	1.04554	-1.04554	-0.11879	0.11879	-0.627597	0.627597	-0.0996584	0.0996584	0.00719741	-0.00719741	0.233156	-0.233156	0.659813	-0.659813	-1.76916	1.76916	-1.83555	1.83555	0.0721255	1
882	OG0004847	79.7996	56.1898	463.848	313.966	636.831	640.899	309.278	275.881	257.407	197.465	640.744	420.602	290.486	168.967	268.298	199.171	278.421	520.472	0.902515	-0.902515	1.0017	-1.0017	-0.0165496	0.0165496	0.296693	-0.296693	0.685022	-0.685022	1.07823	-1.07823	1.3749	-1.3749	0.768711	-0.768711	-1.57501	1.57501	0.0723978	1
569	OG0004108	88.7581	68.0149	521.163	456.385	874.859	836.318	884.907	965.586	924.099	902.333	844.248	889.533	1079.35	1042.75	762.703	718.268	1445.12	1153.77	1.95596	-1.95596	0.979594	-0.979594	0.33295	-0.33295	-0.644509	0.644509	0.17617	-0.17617	-0.386118	0.386118	0.254988	-0.254988	0.443543	-0.443543	1.65725	-1.65725	0.072894	1
1041	OG0005225	767.308	737.485	574.364	598.758	205.896	212.214	474.468	492.084	385.697	386.034	913.5	789.551	244.436	216.537	405.654	397.067	552.865	376.252	0.267679	-0.267679	-0.280855	0.280855	-0.204071	0.204071	-0.246164	0.246164	-0.00589997	0.00589997	0.983021	-0.983021	0.817452	-0.817452	0.144482	-0.144482	2.56744	-2.56744	0.0731604	1
832	OG0004727	474.283	615.394	536.027	1217.2	393.771	348.853	370.488	406.149	813.22	1100.97	341.761	623.31	510.038	752.9	1049.28	1196.63	707.994	404.741	-0.599395	0.599395	-1.79833	1.79833	0.279965	-0.279965	-0.212532	0.212532	-0.695796	0.695796	-1.35034	1.35034	-0.890073	0.890073	-0.303667	0.303667	1.26143	-1.26143	0.0732552	1
398	OG0003680	334	110.482	231.956	181.883	301.386	350.923	181.058	179.141	178.636	240.791	291.633	301.298	118.557	144.829	693.698	674.637	295.135	420.448	2.52796	-2.52796	0.608255	-0.608255	-0.381764	0.381764	0.0267418	-0.0267418	-0.744952	0.744952	-0.0819445	0.0819445	-0.501433	0.501433	0.0700272	-0.0700272	-0.880339	0.880339	0.073737	1
1033	OG0005203	397.159	317.712	121.004	179.316	184.986	173.605	634.584	479.158	153.268	161.635	97.0532	86.6352	208.899	130.275	158.223	123.814	101.823	76.1808	0.800507	-0.800507	-1.39859	1.39859	0.228603	-0.228603	1.0052	-1.0052	-0.191385	0.191385	0.408523	-0.408523	1.66973	-1.66973	0.878781	-0.878781	1.03762	-1.03762	0.0738045	1
281	OG0003366	545.801	566.068	691.248	826.476	777.554	581.107	688.385	622.855	753.713	759.937	569.026	602.517	533.125	444.07	1276.66	1268.08	1157.43	656.55	-0.155324	0.155324	-0.759215	0.759215	1.23204	-1.23204	0.425845	-0.425845	-0.0350402	0.0350402	-0.243593	0.243593	0.776546	-0.776546	0.0287224	-0.0287224	2.35283	-2.35283	0.0738403	1
1076	OG0005311	284.952	191.694	829.732	1081.03	327.309	350.335	733.329	710.71	262.746	266.736	280.58	284.725	606.62	574.697	147.795	146.902	283.998	323.332	2.29049	-2.29049	-1.53962	1.53962	-0.397788	0.397788	0.183373	-0.183373	-0.0882201	0.0882201	-0.0858415	0.0858415	0.316357	-0.316357	0.0354755	-0.0354755	-0.758202	0.758202	0.0747299	1
638	OG0004278	187.192	223.073	891.548	697.28	181.924	194.885	225.193	241.044	146.531	145.057	120.967	119.416	154.645	113.236	90.5399	82.7118	117.732	116.888	-1.12958	1.12958	1.57922	-1.57922	-0.444276	0.444276	-0.439101	0.439101	0.0652987	-0.0652987	0.0833239	-0.0833239	1.99649	-1.99649	0.583577	-0.583577	0.0464841	-0.0464841	0.0754373	1
940	OG0004998	685.294	653.237	424.699	373.78	361.817	414.54	444.667	416.043	366.892	361.466	264.941	265.53	493.486	392.241	511.937	500.85	374.676	344.267	0.438196	-0.438196	1.1668	-1.1668	-1.24257	1.24257	0.608475	-0.608475	0.136318	-0.136318	-0.0202995	0.0202995	2.09149	-2.09149	0.200282	-0.200282	0.773886	-0.773886	0.0761432	1
431	OG0003757	581.266	756.738	115.385	246.488	1307.62	1278.28	614.854	782.287	552.723	583.5	354.543	601.192	402.605	379.11	862.135	987.724	517.872	375.67	-0.748242	0.748242	-2.06703	2.06703	0.064735	-0.064735	-0.683743	0.683743	-0.154541	0.154541	-1.47243	1.47243	0.171476	-0.171476	-0.38735	0.38735	0.907991	-0.907991	0.0770879	1
121	OG0003018	1084.97	1022.41	652.037	830.187	182.572	293.932	592.46	540.453	505.28	508.897	641.655	622.378	658.123	684.678	483.101	418.377	266.489	383.23	0.260826	-0.260826	-1.05593	1.05593	-2.05316	2.05316	0.403302	-0.403302	-0.0313328	0.0313328	0.133981	-0.133981	-0.173739	0.173739	0.630776	-0.630776	-1.57856	1.57856	0.0776858	1
1079	OG0005315	383.13	352.64	537.401	483.746	597.175	36.2997	451.354	412.006	282.115	260.217	274.141	289.408	316.603	257.706	310.898	295.578	295.922	282.043	0.13469	-0.13469	0.170784	-0.170784	2.87782	-2.87782	0.148134	-0.148134	0.131239	-0.131239	-0.0880579	0.0880579	0.33333	-0.33333	0.0821055	-0.0821055	0.0780506	-0.0780506	0.0778888	1
708	OG0004443	75.0507	69.5668	535.777	530.544	304.592	249.612	395.458	337.986	256.289	248.378	318.298	295.965	400.16	315.212	232.119	228.853	252.17	307.631	0.533279	-0.533279	0.0690063	-0.0690063	1.39517	-1.39517	1.10199	-1.10199	0.220453	-0.220453	0.511305	-0.511305	1.66997	-1.66997	0.099655	-0.099655	-1.39328	1.39328	0.0778952	1
620	OG0004241	802.939	961.535	243.32	991.521	207.577	213.963	1059.2	1325.59	2222.24	3364.25	228.553	472.017	409.387	848.739	1420.46	2079.22	480.476	141.894	-0.261553	0.261553	-1.76316	1.76316	-0.0440882	0.0440882	-0.32505	0.32505	-0.594862	0.594862	-1.01127	1.01127	-1.01618	1.01618	-0.54775	0.54775	1.58306	-1.58306	0.0781615	1
1018	OG0005172	333.043	333.826	816.559	382.443	166.745	229.508	168.251	161.672	237.201	191.541	249.758	225.72	263.158	238.541	168.875	148.425	285.581	259.364	-0.0080776	0.0080776	2.49255	-2.49255	-1.09041	1.09041	0.137281	-0.137281	0.733149	-0.733149	0.348037	-0.348037	0.337785	-0.337785	0.443694	-0.443694	0.331201	-0.331201	0.0782558	1
270	OG0003335	363.015	271.366	227.086	244.355	124.862	200.669	285.594	239.226	348.927	358.805	280.12	274.891	215.952	298.173	313.341	280.609	262.519	344.267	1.16242	-1.16242	-0.294733	0.294733	-1.87371	1.87371	0.71088	-0.71088	-0.112298	0.112298	0.0758076	-0.0758076	-1.28677	1.28677	0.443422	-0.443422	-1.08399	1.08399	0.0784854	1
726	OG0004480	149.693	142.927	357.956	940.849	195.38	236.138	149.564	131.881	113.688	108.348	152.709	169.056	135.651	135.241	136.476	125.844	108.195	153.525	0.134926	-0.134926	-2.61887	2.61887	-0.551162	0.551162	0.366638	-0.366638	0.140343	-0.140343	-0.296452	0.296452	0.00883731	-0.00883731	0.236509	-0.236509	-1.01069	1.01069	0.0786562	1
287	OG0003380	381.028	316.844	427.324	293.808	247.797	224.871	299.614	272.854	291.375	246.898	662.349	580.69	334.238	263.382	211.036	172.02	344.439	526.88	0.753334	-0.753334	1.51653	-1.51653	0.397296	-0.397296	0.382872	-0.382872	0.676816	-0.676816	0.538087	-0.538087	0.97114	-0.97114	0.834273	-0.834273	-1.71506	1.71506	0.0786807	1
141	OG0003058	108.237	51.7846	306.196	364.944	47.3106	147.245	212.92	254.44	147.935	188.282	141.67	152.665	348.619	342.9	183.521	178.871	161.484	127.937	1.56247	-1.56247	-0.387693	0.387693	-2.27499	2.27499	-0.393478	0.393478	-0.531497	0.531497	-0.165451	0.165451	0.036632	-0.036632	0.0568331	-0.0568331	0.513373	-0.513373	0.0788564	1
785	OG0004609	328.163	217.184	388.362	367.685	403.89	424.85	236.55	212.97	209.411	231.208	189.507	200.432	242.537	165.066	194.17	178.868	217.964	184.346	1.93954	-1.93954	0.260656	-0.260656	-0.241042	0.241042	0.499935	-0.499935	-0.471488	0.471488	-0.267029	0.267029	1.81148	-1.81148	0.39096	-0.39096	0.796425	-0.796425	0.0791542	1
716	OG0004457	84.6733	75.1013	195.118	361.766	328.378	221.065	319.91	351.82	297.554	447.022	307.258	325.467	253.12	654.214	177.973	190.795	291.937	250.088	0.284371	-0.284371	-1.42046	1.42046	0.927092	-0.927092	-0.225489	0.225489	-0.952863	0.952863	-0.136604	0.136604	-2.09831	2.09831	-0.165046	0.165046	0.366483	-0.366483	0.079189	1
729	OG0004485	662.398	705.438	820.743	535.637	1009.19	657.746	381.04	455.63	745.288	620.801	1497.66	1239.11	587.9	642.855	730.533	645.459	1789.3	2106.28	-0.257182	0.257182	1.71802	-1.71802	1.72322	-1.72322	-0.728669	0.728669	0.744816	-0.744816	0.77215	-0.77215	-0.36495	0.36495	0.505337	-0.505337	-0.665059	0.665059	0.0795146	1
470	OG0003878	384.334	365.365	607.268	485.488	516.547	428.612	582.716	595.893	124.077	122.265	132.931	168.119	310.095	283.623	234.56	219.97	198.077	143.057	0.290252	-0.290252	1.27845	-1.27845	1.06731	-1.06731	-0.128254	0.128254	0.084396	-0.084396	-1.3409	1.3409	0.511496	-0.511496	0.36824	-0.36824	1.85024	-1.85024	0.0804231	1
85	OG0002945	181.894	183.063	1101.46	1197.7	1329.81	1033.07	1601.56	1553	1379.42	1254.61	935.11	1108	1491.58	1103.25	1273.69	1355.43	1347.57	613.517	-0.0213818	0.0213818	-0.279479	0.279479	0.838545	-0.838545	0.102801	-0.102801	0.316379	-0.316379	-0.565029	0.565029	0.999298	-0.999298	-0.20758	0.20758	2.49933	-2.49933	0.0808853	1
35	OG0002825	220.693	201.905	922.515	810.814	1491.3	1450.24	1081.02	1124.13	1084.95	873.614	1125.55	1116.43	1231.15	1041.85	878.326	843.615	1145.5	1299.72	0.752288	-0.752288	1.09047	-1.09047	0.236211	-0.236211	-0.330767	0.330767	1.82588	-1.82588	0.0688133	-0.0688133	1.40918	-1.40918	0.341104	-0.341104	-1.06725	1.06725	0.0813899	1
611	OG0004218	668.528	373.108	1201.05	453.491	196.995	206.838	251.53	234.882	168.707	174.371	178.472	165.314	250.402	213.693	185.072	168.976	143.984	149.454	1.51788	-1.51788	2.41813	-2.41813	-0.130439	0.130439	0.183177	-0.183177	-0.0883508	0.0883508	0.20484	-0.20484	0.423321	-0.423321	0.24332	-0.24332	-0.0997712	0.0997712	0.081805	1
799	OG0004645	280.206	280.294	1074.71	888.348	153.265	131.924	636.842	609.628	319.16	251.04	407.071	384.473	597.39	429.162	326.254	330.649	303.885	405.91	-0.00164805	0.00164805	0.992718	-0.992718	0.782457	-0.782457	0.228298	-0.228298	1.24923	-1.24923	0.298535	-0.298535	1.71361	-1.71361	-0.0699602	0.0699602	-1.50302	1.50302	0.0820407	1
1059	OG0005270	1118.51	1069.34	131.681	189.937	534.774	524.937	139.659	177.022	541.208	566.326	395.572	305.799	222.198	206.867	630.899	707.117	388.994	668.757	0.175939	-0.175939	-1.41801	1.41801	0.0726729	-0.0726729	-0.923645	0.923645	-0.177543	0.177543	1.00203	-1.00203	0.279711	-0.279711	-0.445944	0.445944	-2.07055	2.07055	0.0824002	1
973	OG0005071	1212.95	1110.73	980.583	723.871	1423.92	1474.28	702.481	659.207	597.354	485.208	766.301	705.73	608.519	387.268	618.243	541.94	677.765	944.985	0.371546	-0.371546	1.27202	-1.27202	-0.146771	0.146771	0.268399	-0.268399	0.874911	-0.874911	0.347523	-0.347523	1.87652	-1.87652	0.555459	-0.555459	-1.39076	1.39076	0.082459	1
605	OG0004201	2118.44	2003.24	1009.99	1711.09	1456.43	1540.77	580.3	767.36	513.14	526.358	399.542	543.694	215.844	193.432	846.812	564.774	645.93	1077	0.175239	-0.175239	-1.61531	1.61531	-0.176417	0.176417	-0.870201	0.870201	-0.0797165	0.0797165	-0.958125	0.958125	0.343313	-0.343313	1.25262	-1.25262	-1.56857	1.56857	0.0832372	1
1008	OG0005152	520.612	460.16	281.345	315.141	301.036	285.853	581.72	616.447	455.036	439.736	989.836	863.027	508.679	666.638	518.388	547.268	969.686	1289.26	0.785738	-0.785738	-0.722264	0.722264	0.329777	-0.329777	-0.369473	0.369473	0.217973	-0.217973	0.872456	-0.872456	-1.71327	1.71327	-0.34548	0.34548	-1.80343	1.80343	0.08414	1
560	OG0004094	379.762	383.583	385.863	260.551	152.91	170.766	551.714	511.993	241.409	177.331	273.221	234.617	618.432	392.425	197.945	171.508	202.85	300.071	-0.0360643	0.0360643	1.39684	-1.39684	-0.397507	0.397507	0.269067	-0.269067	1.10261	-1.10261	0.547724	-0.547724	1.611	-1.611	0.51561	-0.51561	-1.39291	1.39291	0.0857374	1
800	OG0004648	384.24	409.409	472.282	522.707	507.506	491.578	354.784	352.931	324.78	322.397	322.897	355.434	306.023	292.139	264.514	266.406	272.065	341.354	-0.662794	0.662794	-1.05918	1.05918	0.333207	-0.333207	0.0547334	-0.0547334	0.0769465	-0.0769465	-1.00247	1.00247	0.485117	-0.485117	-0.0744598	0.0744598	-2.36073	2.36073	0.0867492	1
648	OG0004292	1100.05	932.548	285.691	281.487	887.872	173.017	589.079	568.122	617.562	508.894	696.846	648.593	374.156	291.656	833.551	751.63	528.205	680.399	0.337862	-0.337862	0.0303895	-0.0303895	2.76258	-2.76258	0.0742486	-0.0742486	0.395506	-0.395506	0.147037	-0.147037	0.508009	-0.508009	0.211877	-0.211877	-0.516274	0.516274	0.0871679	1
232	OG0003256	700.988	443.047	345.654	219.184	165.713	195.575	427.996	433.918	403.657	294.114	455.828	464.547	399.892	396.863	195.504	210.078	603.777	440.22	1.65146	-1.65146	1.64003	-1.64003	-0.605419	0.605419	-0.050325	0.050325	1.1499	-1.1499	-0.0693922	0.0693922	0.027846	-0.027846	-0.263198	0.263198	1.14751	-1.14751	0.089669	1
1058	OG0005269	101.29	105.723	125.063	177.095	313.185	363.343	109.853	161.167	559.912	709.196	176.628	207.924	236.302	461.734	679.626	714.871	535.364	280.874	-0.115144	0.115144	-0.92583	0.92583	-0.3986	0.3986	-1.01795	1.01795	-0.632414	0.632414	-0.437558	0.437558	-1.7363	1.7363	-0.135883	0.135883	1.67626	-1.67626	0.0897966	1
1015	OG0005169	667.059	788.562	318.058	575.34	279.892	267.383	187.178	218.019	169.828	178.513	115.912	196.685	125.882	153.352	223.021	247.121	226.715	149.454	-0.521104	0.521104	-1.79784	1.79784	0.142693	-0.142693	-0.475176	0.475176	-0.155654	0.155654	-1.61313	1.61313	-0.61415	0.61415	-0.320011	0.320011	1.28222	-1.28222	0.0899875	1
984	OG0005098	300.898	473.502	275.725	358.809	1926.74	1784.21	2293.56	2742.25	3857.21	4147.41	2556.33	3867.12	2501.91	6129.65	2594.11	2956.7	7846.73	4934.55	-1.09525	1.09525	-0.643418	0.643418	0.188729	-0.188729	-0.437826	0.437826	-0.17815	0.17815	-1.00275	1.00275	-2.06526	2.06526	-0.320984	0.320984	1.11962	-1.11962	0.0905001	1
532	OG0004032	414.807	436.908	296.205	408.782	593.646	605.989	489.047	486.024	486.756	530.212	491.705	592.407	456.047	547.016	826.398	901.206	575.934	445.454	-0.301014	0.301014	-1.85246	1.85246	-0.119355	0.119355	0.0359733	-0.0359733	-0.495706	0.495706	-1.07756	1.07756	-1.05207	1.05207	-0.502322	0.502322	1.48196	-1.48196	0.090822	1
745	OG0004519	141.361	120.735	160.278	75.7921	173.844	196.426	400.613	369.49	433.977	422.74	216.645	174.198	130.22	84.132	122.054	94.3853	155.12	228.542	0.458148	-0.458148	2.08353	-2.08353	-0.355057	0.355057	0.235284	-0.235284	0.0763558	-0.0763558	0.63227	-0.63227	1.25174	-1.25174	0.744221	-0.744221	-1.11412	1.11412	0.0910068	1
161	OG0003102	80.5574	78.7232	214.287	212.678	163.179	135.196	685.97	876.32	203.516	213.149	223.084	285.189	167.116	136.313	141.358	192.064	167.856	240.754	0.103848	-0.103848	0.0339777	-0.0339777	0.845775	-0.845775	-1.09879	1.09879	-0.208513	0.208513	-1.10192	1.10192	0.915507	-0.915507	-1.37148	1.37148	-1.6089	1.6089	0.0912384	1
1097	OG0005355	615.99	465.031	1118.26	1090	2555.03	2526.59	874.275	848.414	1332.54	1008.02	1796.17	1608.6	1324.47	574.349	1197.84	1068.6	1575.06	2043.51	0.871477	-0.871477	0.0798698	-0.0798698	0.0349257	-0.0349257	0.0936879	-0.0936879	0.865263	-0.865263	0.343788	-0.343788	2.46535	-2.46535	0.355856	-0.355856	-0.807888	0.807888	0.0913787	1
233	OG0003258	188.907	176.031	269.778	175.932	348.342	414.244	307.587	263.156	885.644	733.882	373.038	295.969	274.55	221.51	314.231	255.998	318.204	451.845	0.281899	-0.281899	1.68237	-1.68237	-0.690508	0.690508	0.622015	-0.622015	0.748739	-0.748739	0.920461	-0.920461	0.854329	-0.854329	0.815974	-0.815974	-1.38669	1.38669	0.092563	1
47	OG0002849	944.646	1315.48	1578.55	476.955	2598.71	3271.78	795.344	826.537	1474.28	1369.18	2988.87	2232.84	1863.64	1734.37	723.651	720.308	5272.5	4448.13	-0.798979	0.798979	2.60968	-2.60968	-0.558303	0.558303	-0.0936521	0.0936521	0.179983	-0.179983	0.705032	-0.705032	0.174956	-0.174956	0.0112738	-0.0112738	0.412965	-0.412965	0.0930235	1
329	OG0003490	399.559	301.109	53.0083	42.9233	245.743	290.597	571.038	594.984	690.101	435.153	975.136	832.635	848.069	720.949	720.402	607.46	941.868	1125.85	1.19522	-1.19522	0.894242	-0.894242	-0.711376	0.711376	-0.174686	0.174686	1.92726	-1.92726	0.670527	-0.670527	0.68917	-0.68917	0.723512	-0.723512	-0.756867	0.756867	0.0933129	1
227	OG0003249	82.5062	60.7309	556.507	547.871	305.409	282.951	166.237	195.802	194.533	126.409	404.307	298.301	286.49	201.628	148.903	126.349	466.157	616.424	1.12461	-1.12461	0.0578479	-0.0578479	0.282369	-0.282369	-0.604113	0.604113	1.57023	-1.57023	1.11611	-1.11611	1.28612	-1.28612	0.60616	-0.60616	-1.02683	1.02683	0.0945838	1
1117	OG0005408	1037.53	776.408	647.98	248.882	977.009	1046.25	611.067	605.893	411.806	378.038	532.178	547.436	520.887	445.845	426.521	397.829	552.857	553.032	0.876643	-0.876643	2.70995	-2.70995	-0.208417	0.208417	0.0258896	-0.0258896	0.260357	-0.260357	-0.086068	0.086068	0.472721	-0.472721	0.211961	-0.211961	-0.000960311	0.000960311	0.0960312	1
313	OG0003448	111.134	95.0496	522.846	172.524	535.927	587.722	372.503	387.264	233.771	182.314	286.532	265.965	131.305	102.938	130.699	119.498	172.621	210.515	0.411465	-0.411465	2.65728	-2.65728	-0.243135	0.243135	-0.102471	0.102471	0.6523	-0.6523	0.196346	-0.196346	0.638741	-0.638741	0.236134	-0.236134	-0.521673	0.521673	0.0960987	1
59	OG0002885	321.731	296.426	291.022	249.881	433.912	467.576	211.904	208.929	193.127	174.066	231.368	248.198	510.847	516.13	430.511	398.595	273.648	243.668	0.897098	-0.897098	1.66687	-1.66687	-0.818354	0.818354	0.154928	-0.154928	1.13758	-1.13758	-0.769089	0.769089	-0.11274	0.11274	0.843609	-0.843609	1.27007	-1.27007	0.0965348	1
675	OG0004361	420.741	418.956	717.222	833.756	442.925	434.605	576.999	372.824	630.786	714.501	229.993	311.423	730.996	420.688	783.729	683.08	972.884	194.813	0.00800177	-0.00800177	-0.282862	0.282862	0.0356937	-0.0356937	0.809259	-0.809259	-0.234268	0.234268	-0.566215	0.566215	1.01435	-1.01435	0.258323	-0.258323	2.50851	-2.50851	0.0967498	1
480	OG0003898	109.89	92.9435	188.626	149.276	161.372	163.402	287.935	280.425	270.889	270.874	198.706	209.329	419.97	349.289	317.78	366.37	208.41	144.22	0.933714	-0.933714	1.30145	-1.30145	-0.0698558	0.0698558	0.14767	-0.14767	0.000303355	-0.000303355	-0.290966	0.290966	1.02685	-1.02685	-0.793743	0.793743	2.03436	-2.03436	0.0967648	1
275	OG0003352	236.802	231.881	500.873	328.984	286.622	290.325	285.518	272.954	218.674	211.077	288.4	280.506	219.208	166.131	229.232	196.885	211.592	268.656	0.106289	-0.106289	2.09713	-2.09713	-0.064981	0.064981	0.227766	-0.227766	0.178978	-0.178978	0.14048	-0.14048	1.39459	-1.39459	0.768591	-0.768591	-1.20303	1.20303	0.0968469	1
697	OG0004419	1145.4	1015.71	477.773	433.855	3038.39	2681.36	330.541	357.475	452.512	450.216	397.872	439.727	514.108	378.4	730.311	797.179	711.168	466.383	0.610599	-0.610599	0.490178	-0.490178	0.635122	-0.635122	-0.398328	0.398328	0.0258802	-0.0258802	-0.508448	0.508448	1.54711	-1.54711	-0.445425	0.445425	2.11512	-2.11512	0.0970744	1
1025	OG0005188	530.852	487.709	206.419	172.524	2777.63	2533.62	626.817	660.274	830.835	892.839	902.456	1409.11	549.382	708.883	1923.75	2317.96	1456.54	1423.04	0.419254	-0.419254	0.885359	-0.885359	0.45474	-0.45474	-0.257292	0.257292	-0.356056	0.356056	-2.16951	2.16951	-1.25473	1.25473	-0.919904	0.919904	0.115159	-0.115159	0.0971464	1
404	OG0003697	216.25	148.127	1476.71	808.769	1876.88	1827.7	1338.19	1162.8	1145.58	733.885	1217.99	1215.24	1680.41	1459.3	514.839	450.089	987.202	1495.7	1.14949	-1.14949	1.79691	-1.79691	0.081628	-0.081628	0.431177	-0.431177	1.3468	-1.3468	0.00695018	-0.00695018	0.432991	-0.432991	0.41258	-0.41258	-1.2592	1.2592	0.0974312	1
544	OG0004055	628.528	534.446	248.875	306.172	1894.58	1819.72	472.295	436.04	640.858	620.203	525.361	614.829	871.134	1047.17	723.427	751.257	479.68	466.971	1.26829	-1.26829	-1.61838	1.61838	0.315949	-0.315949	0.625749	-0.625749	0.256789	-0.256789	-1.23018	1.23018	-1.43868	1.43868	-0.295859	0.295859	0.210483	-0.210483	0.0986075	1
570	OG0004109	47.2555	76.2799	168.644	106.484	152.392	149.005	343.913	406.149	245.622	254.894	248.383	298.311	291.644	232.862	171.76	146.397	392.168	275.065	-1.65329	1.65329	1.58985	-1.58985	0.0790761	-0.0790761	-0.583881	0.583881	-0.130354	0.130354	-0.642658	0.642658	0.78863	-0.78863	0.560947	-0.560947	1.23501	-1.23501	0.0995028	1
526	OG0004017	168.308	140.911	410.714	344.218	353.602	123.175	411.083	375.146	347.523	321.796	317.828	283.789	257.189	251.675	204.381	199.675	268.088	340.202	0.496885	-0.496885	0.493971	-0.493971	2.7104	-2.7104	0.256334	-0.256334	0.21556	-0.21556	0.317307	-0.317307	0.0607694	-0.0607694	0.0653041	-0.0653041	-0.664855	0.664855	0.100643	1
926	OG0004967	817.706	797.461	2378.56	2624.86	300.004	652.535	750.886	745.649	887.609	1131.47	609.917	799.718	456.053	680.478	1293.97	1327.96	829.696	491.389	0.0694316	-0.0694316	-0.272678	0.272678	-2.05007	2.05007	0.0193868	-0.0193868	-0.669023	0.669023	-0.745841	0.745841	-1.09382	1.09382	-0.0718049	0.0718049	1.41852	-1.41852	0.104982	1
180	OG0003145	898.968	884.234	743.319	723.022	1771.21	1686.66	913.419	1019.01	1398.22	1510.4	761.946	1108.43	1333.79	1429.15	2063.77	2051.81	824.915	778.096	0.117965	-0.117965	0.197628	-0.197628	0.349064	-0.349064	-0.780092	0.780092	-0.550643	0.550643	-2.64481	2.64481	-0.492774	0.492774	0.0415121	-0.0415121	0.416983	-0.416983	0.105021	1
332	OG0003502	151.692	58.6782	196.198	165.209	233.547	231.078	315.318	289.01	253.078	238.325	170.188	158.753	269.669	238.186	278.497	234.181	175.795	223.902	2.67237	-2.67237	0.518255	-0.518255	0.0321203	-0.0321203	0.263124	-0.263124	0.181461	-0.181461	0.21011	-0.21011	0.374684	-0.374684	0.522453	-0.522453	-0.727454	0.727454	0.108058	1
26	OG0002804	217.235	259.165	90.2854	166.124	292.438	330.139	254.591	234.075	154.391	154.826	116.832	121.289	101.465	93.3577	144.023	136.754	77.958	100.605	-0.7423	0.7423	-2.49452	2.49452	-0.510732	0.510732	0.354079	-0.354079	-0.0118712	0.0118712	-0.15788	0.15788	0.350969	-0.350969	0.218353	-0.218353	-1.06968	1.06968	0.108552	1
262	OG0003310	317.901	409.594	788.213	1286.94	305.222	250.817	458.198	550.552	332.084	455.012	469.162	724.926	278.896	454.01	506.626	576.192	607.754	342.517	-0.669785	0.669785	-1.27716	1.27716	0.519956	-0.519956	-0.486521	0.486521	-0.829953	0.829953	-1.13824	1.13824	-1.26971	1.26971	-0.341405	0.341405	1.48326	-1.48326	0.108883	1
1073	OG0005303	95.1004	131.524	175.574	261.463	168.92	317.9	73.6155	82.2001	94.6025	121.38	523.448	261.779	103.25	126.672	145.574	127.366	171.03	380.91	-0.70087	0.70087	-0.857003	0.857003	-1.33451	1.33451	-0.240254	0.240254	-0.540643	0.540643	1.45318	-1.45318	-0.444223	0.444223	0.290908	-0.290908	-1.65822	1.65822	0.108901	1
959	OG0005036	304.11	264.161	239.885	252.799	114.234	172.536	338.515	340.512	391.755	359.255	382.541	365.394	455.233	510.326	417.191	473.436	394.563	380.322	0.858844	-0.858844	-0.320215	0.320215	-2.48375	2.48375	-0.0359338	0.0359338	0.528699	-0.528699	0.28008	-0.28008	-0.697072	0.697072	-0.771526	0.771526	0.224519	-0.224519	0.109369	1
624	OG0004249	805.293	883.761	483.141	812.294	410.308	402.957	240.871	314.178	304.569	405.28	197.326	237.896	402.876	372.366	317.333	319.179	309.445	230.287	-0.367099	0.367099	-2.00778	2.00778	0.0714252	-0.0714252	-1.04364	1.04364	-1.1211	1.1211	-0.736586	0.736586	0.310984	-0.310984	-0.0229084	0.0229084	1.15892	-1.15892	0.110443	1
637	OG0004277	65.7742	91.0142	157.44	98.5166	258.178	194.487	460.483	522.364	344.43	243.346	392.352	387.283	379.816	294.631	230.122	202.213	348.424	522.792	-1.0698	1.0698	1.52986	-1.52986	0.935048	-0.935048	-0.418406	0.418406	1.14288	-1.14288	0.0432128	-0.0432128	0.839355	-0.839355	0.429006	-0.429006	-1.33005	1.33005	0.111503	1
183	OG0003149	150.84	86.4618	400.288	247.836	476.252	509.154	283.344	302.643	726.206	683.558	506.884	323.126	255.29	217.594	186.408	194.601	332.515	386.143	1.79834	-1.79834	1.55922	-1.55922	-0.22133	0.22133	-0.218311	0.218311	0.200528	-0.200528	1.46756	-1.46756	0.528409	-0.528409	-0.142544	0.142544	-0.494661	0.494661	0.112107	1
1103	OG0005378	49.3416	95.0574	144.418	119.108	1419.43	1482.11	301.305	330.008	405.344	359.687	73.5948	105.367	273.467	251.679	132.259	161.11	121.71	326.827	-1.5224	1.5224	0.461839	-0.461839	-0.103882	0.103882	-0.218632	0.218632	0.286986	-0.286986	-0.853722	0.853722	0.199513	-0.199513	-0.472907	0.472907	-2.19903	2.19903	0.112483	1
72	OG0002916	3591.89	3533.83	2049.51	2218.47	2320.64	2149.78	1815.89	1656.2	1218.29	757.569	3935.36	2058.08	1822.2	797.91	1463.7	1149.82	1715.08	3426.4	0.0359886	-0.0359886	-0.174849	0.174849	0.168807	-0.168807	0.203131	-0.203131	1.02988	-1.02988	1.38342	-1.38342	1.72665	-1.72665	0.530442	-0.530442	-1.47009	1.47009	0.112782	1
1030	OG0005199	743.535	739.049	786.963	796.752	1628.87	1624.87	759.746	864.302	940.95	904.405	729.049	843.419	985.35	1571.82	728.982	743.391	979.248	865.896	0.0342447	-0.0342447	-0.0699626	0.0699626	0.0139262	-0.0139262	-0.72872	0.72872	0.224159	-0.224159	-0.823271	0.823271	-2.59594	2.59594	-0.110777	0.110777	0.695355	-0.695355	0.113038	1
632	OG0004264	182.059	179.794	196.929	185.845	309.003	296.984	181.621	178.637	128.285	114.568	345.436	369.492	162.236	110.396	173.757	183.691	161.484	162.248	0.088436	-0.088436	0.409068	-0.409068	0.280178	-0.280178	0.117009	-0.117009	0.797909	-0.797909	-0.475335	0.475335	2.68604	-2.68604	-0.392614	0.392614	-0.0333035	0.0333035	0.113617	1
793	OG0004630	346.804	386.143	1059.32	798.494	313.876	295.152	480.189	534.597	504.438	467.153	807.698	799.39	698.318	763.194	439.607	436.647	793.891	637.36	-0.764899	0.764899	2.00073	-2.00073	0.438145	-0.438145	-0.764077	0.764077	0.546895	-0.546895	0.0736764	-0.0736764	-0.632597	0.632597	0.0481309	-0.0481309	1.55859	-1.55859	0.11389	1
702	OG0004430	1098.02	1172.92	502.499	818.064	829.541	761.323	992.512	1165.73	1016.46	1037.33	345.9	398.517	390.393	307.051	1085.3	1199.22	531.395	603.055	-0.316472	0.316472	-2.29285	2.29285	0.411449	-0.411449	-0.7701	0.7701	-0.0975244	0.0975244	-0.678196	0.678196	1.14657	-1.14657	-0.478442	0.478442	-0.606091	0.606091	0.114242	1
728	OG0004484	156.11	152.698	332.104	200.516	595.849	561.946	328.93	387.263	333.763	261.407	332.561	291.745	406.948	298.883	183.521	174.05	322.961	428.589	0.0887954	-0.0887954	1.98555	-1.98555	0.235336	-0.235336	-0.654581	0.654581	0.977039	-0.977039	0.525426	-0.525426	1.23045	-1.23045	0.212866	-0.212866	-1.12954	1.12954	0.114368	1
235	OG0003260	2408.15	3750.08	1325.43	1522.94	330.46	347.054	653.995	1267.72	1384.47	2444.11	700.071	699.169	375.478	1732.26	1598.87	1228.75	660.256	398.35	-0.746542	0.746542	-0.23756	0.23756	-0.0839111	0.0839111	-1.09412	1.09412	-0.948205	0.948205	0.00220652	-0.00220652	-2.20533	2.20533	0.448436	-0.448436	0.847601	-0.847601	0.114417	1
1069	OG0005289	227.594	218.292	236.452	236.823	235.886	195.697	262.726	254.475	340.503	304.028	167.888	206.52	133.638	122.824	237.445	209.066	198.864	186.672	0.350964	-0.350964	-0.0131749	0.0131749	1.5667	-1.5667	0.268427	-0.268427	0.952123	-0.952123	-1.73597	1.73597	0.709439	-0.709439	1.06936	-1.06936	0.532074	-0.532074	0.115619	1
521	OG0003997	1225.43	925.015	847.779	604.421	417.361	637.078	1229.54	1105.65	1672.76	1229.45	1852.9	1443.04	1263.97	810.405	1666.33	1070.43	1306.99	1822.52	0.806573	-0.806573	0.967547	-0.967547	-1.20308	1.20308	0.30633	-0.30633	0.881905	-0.881905	0.71797	-0.71797	1.26243	-1.26243	1.25717	-1.25717	-0.951114	0.951114	0.115951	1
1064	OG0005283	433.541	418.887	433.985	406.987	754.248	787.828	660.355	761.707	315.797	349.029	251.138	317.511	292.732	271.199	280.94	304.461	272.853	252.385	0.301714	-0.301714	0.563455	-0.563455	-0.382189	0.382189	-1.25089	1.25089	-0.877316	0.877316	-2.04861	2.04861	0.670181	-0.670181	-0.705189	0.705189	0.683949	-0.683949	0.11667	1
1014	OG0005168	3855.28	4369.17	1858.33	3248.61	359.38	356.314	2227.64	2288.93	2031.23	1947.36	1668.77	1708.82	1957.95	2027.96	2285.47	2339.02	1418.36	1463.14	-0.646143	0.646143	-2.81516	2.81516	0.0443062	-0.0443062	-0.140333	0.140333	0.217991	-0.217991	-0.122631	0.122631	-0.181628	0.181628	-0.119751	0.119751	-0.160719	0.160719	0.117046	1
1196	OG0005612	593.384	944.657	295.953	1140.36	218.135	179.686	444.588	514.702	567.598	892.862	179.397	410.229	350.244	601.678	1411.35	1830.06	388.994	134.334	-0.687305	0.687305	-1.7692	1.7692	0.290851	-0.290851	-0.219954	0.219954	-0.670222	0.670222	-1.17813	1.17813	-0.794867	0.794867	-0.388732	0.388732	1.4644	-1.4644	0.11716	1
830	OG0004715	164.189	83.2548	385.865	234.167	515.329	509.086	163.257	173.587	186.957	181.473	189.967	109.114	377.914	346.102	94.5343	77.3837	194.099	273.32	1.79658	-1.79658	1.34387	-1.34387	0.033474	-0.033474	-0.168452	0.168452	0.0817502	-0.0817502	1.48491	-1.48491	0.241345	-0.241345	0.547958	-0.547958	-0.930943	0.930943	0.119111	1
353	OG0003572	126.799	76.2805	1204.79	801.585	106.958	154.138	336.179	308.902	291.94	433.111	301.279	549.314	164.135	122.462	273.173	317.398	124.9	219.877	1.20495	-1.20495	0.973416	-0.973416	-0.875269	0.875269	0.204819	-0.204819	-0.943102	0.943102	-1.41245	1.41245	0.704307	-0.704307	-0.362721	0.362721	-1.33433	1.33433	0.119114	1
256	OG0003304	154.669	240.787	323.114	217.799	505.149	494.669	577.963	506.624	594.162	636.843	301.283	262.711	262.887	188.142	332.421	308.518	256.148	344.849	-1.65999	1.65999	1.48414	-1.48414	0.0799002	-0.0799002	0.501393	-0.501393	-0.264297	0.264297	0.521337	-0.521337	1.26324	-1.26324	0.28429	-0.28429	-1.12505	1.12505	0.119754	1
509	OG0003970	864.556	1135.18	266.92	312.623	899.224	839.901	741.866	841.177	1677.5	2002.69	809.083	1374.45	705.912	1474.56	1793.49	2237.28	1619.62	899.631	-0.694712	0.694712	-0.404829	0.404829	0.175107	-0.175107	-0.322048	0.322048	-0.453604	0.453604	-1.32917	1.32917	-1.80963	1.80963	-0.5652	0.5652	1.46712	-1.46712	0.11983	1
823	OG0004698	203.805	207.646	765.36	860.913	1370.41	1470.42	1369.36	1492.21	1301.94	1281.56	1530.62	1804.32	1728.76	1509.44	854.137	1029.59	1898.03	1740.53	-0.16107	0.16107	-1.01372	1.01372	-0.60739	0.60739	-0.740653	0.740653	0.136086	-0.136086	-1.41597	1.41597	1.16852	-1.16852	-1.60695	1.60695	0.74681	-0.74681	0.119837	1
243	OG0003274	189.527	159.648	483.827	365.857	792.093	804.904	364.048	353.942	537.848	471.294	887.737	688.853	845.312	566.387	825.289	794.14	807.414	1150.28	0.728719	-0.728719	1.18236	-1.18236	-0.0683117	0.0683117	0.119871	-0.119871	0.56164	-0.56164	1.07428	-1.07428	1.6826	-1.6826	0.163801	-0.163801	-1.49146	1.49146	0.120795	1
205	OG0003200	158.845	190.283	338.698	314.661	447.453	379.947	115.335	137.738	202.676	260.516	704.716	625.183	275.912	284.688	220.15	249.029	149.544	437.888	-0.489114	0.489114	0.199836	-0.199836	0.443168	-0.443168	-0.480837	0.480837	-0.678273	0.678273	0.324841	-0.324841	-0.0850339	0.0850339	-0.334337	0.334337	-2.6662	2.6662	0.121597	1
341	OG0003539	1203.37	1148.02	918.334	776.204	175.235	229.8	1316.45	1290.85	1233.16	1023.71	957.197	978.271	1110.69	832.055	1094.24	1032.88	1060.39	930.452	0.279629	-0.279629	0.996425	-0.996425	-1.60041	1.60041	0.116634	-0.116634	1.10254	-1.10254	-0.129349	0.129349	1.70385	-1.70385	0.342696	-0.342696	0.775359	-0.775359	0.121705	1
384	OG0003643	79.0232	93.6538	244.696	211.67	137.18	146.915	224.47	236.902	546.545	839.566	194.562	187.324	214.051	192.402	166.214	167.966	95.4508	175.047	-0.640341	0.640341	0.546922	-0.546922	-0.258963	0.258963	-0.203642	0.203642	-1.59766	1.59766	0.143235	-0.143235	0.402532	-0.402532	-0.0396201	0.0396201	-2.22389	2.22389	0.123075	1
112	OG0002998	283.128	142.417	296.515	52.2399	434.239	454.408	179.453	165.682	275.653	196.278	542.716	389.624	271.571	238.9	154.448	191.049	418.42	555.945	1.15845	-1.15845	2.45387	-2.45387	-0.0795139	0.0795139	0.139793	-0.139793	0.589245	-0.589245	0.575266	-0.575266	0.224225	-0.224225	-0.371141	0.371141	-0.494486	0.494486	0.123349	1
1190	OG0005599	601.188	607.491	461.6	487.403	342.19	351.181	1137.31	1168.56	609.708	615.478	870.719	1034.94	861.37	713.849	758.045	789.058	455.808	837.413	-0.0469609	0.0469609	-0.244854	0.244854	-0.116779	0.116779	-0.122061	0.122061	-0.0424128	0.0424128	-0.776045	0.776045	0.843367	-0.843367	-0.180519	0.180519	-2.65733	2.65733	0.124928	1
279	OG0003361	496.238	447.65	607.145	437.645	605.334	525.476	331.427	315.062	416.856	392.55	248.838	238.827	611.774	498.026	340.632	306.998	194.107	268.087	0.548946	-0.548946	1.73008	-1.73008	0.753101	-0.753101	0.269958	-0.269958	0.320238	-0.320238	0.218905	-0.218905	1.09302	-1.09302	0.553835	-0.553835	-1.70691	1.70691	0.125677	1
650	OG0004294	116.491	98.519	363.824	347.791	420.213	37.3545	220.281	212.566	210.814	184.137	344.511	289.404	349.973	327.998	213.259	188.004	272.057	371.599	0.281588	-0.281588	0.075903	-0.075903	2.81877	-2.81877	0.0600435	-0.0600435	0.227544	-0.227544	0.292858	-0.292858	0.109193	-0.109193	0.212027	-0.212027	-0.520989	0.520989	0.125721	1
498	OG0003945	128.265	116.327	266.857	174.919	238.793	181.839	94.5522	96.4375	160.85	143.284	254.822	224.788	201.031	139.149	145.352	126.859	112.164	184.666	0.346395	-0.346395	1.47702	-1.47702	0.960985	-0.960985	-0.0700571	0.0700571	0.409933	-0.409933	0.444446	-0.444446	1.29106	-1.29106	0.482174	-0.482174	-1.73353	1.73353	0.126406	1
342	OG0003542	650.655	553.224	950.926	1295	429.263	683.138	1020.3	1096.56	1557.39	1540.9	896.472	1144.98	978.305	914.412	1337.91	1336.07	1171.94	907.197	0.693962	-0.693962	-1.31364	1.31364	-1.95696	1.95696	-0.308936	0.308936	0.0456383	-0.0456383	-1.04384	1.04384	0.28946	-0.28946	0.0058819	-0.0058819	1.09185	-1.09185	0.126449	1
95	OG0002962	1877.32	1653.3	511.051	464.576	319.608	549.493	411.249	485.923	578.546	719.678	385.908	434.581	428.378	480.278	571.422	605.877	602.981	437.906	0.517487	-0.517487	0.388498	-0.388498	-2.15721	2.15721	-0.678808	0.678808	-0.886603	0.886603	-0.483798	0.483798	-0.46582	0.46582	-0.238677	0.238677	1.29339	-1.29339	0.126933	1
210	OG0003209	219.758	272.355	350.273	312.093	345.816	248.09	158.907	185.401	298.671	240.385	1706.94	1272.37	313.348	353.197	208.153	180.903	466.952	550.705	-1.00589	1.00589	0.542499	-0.542499	1.54863	-1.54863	-0.724198	0.724198	1.01762	-1.01762	1.3728	-1.3728	-0.562663	0.562663	0.65919	-0.65919	-0.774558	0.774558	0.126978	1
357	OG0003581	490.057	475.839	338.973	174.569	180.332	143.585	231.476	218.221	109.475	96.5064	191.811	256.632	509.767	145.894	322.435	318.161	236.244	330.886	0.0621269	-0.0621269	1.35114	-1.35114	0.478796	-0.478796	0.124401	-0.124401	0.265716	-0.265716	-0.610062	0.610062	2.34227	-2.34227	0.0281579	-0.0281579	-0.704311	0.704311	0.127474	1
693	OG0004408	93.2732	63.3955	84.1029	74.093	280.704	233.708	240.659	209.941	225.975	181.47	236.456	231.33	257.192	185.995	306.682	291.262	198.077	290.766	1.55502	-1.55502	0.51595	-0.51595	0.744943	-0.744943	0.555872	-0.555872	0.890664	-0.890664	0.0893433	-0.0893433	1.30993	-1.30993	0.210272	-0.210272	-1.54608	1.54608	0.127614	1
558	OG0004090	646.077	671.195	626.378	430.243	672.612	550.417	1206.59	1171.79	657.704	582.606	643.035	587.719	745.697	664.867	464.017	464.812	513.091	696.089	-0.200481	0.200481	1.95168	-1.95168	1.05049	-1.05049	0.153829	-0.153829	0.636604	-0.636604	0.472549	-0.472549	0.602496	-0.602496	-0.00900432	0.00900432	-1.5912	1.5912	0.127685	1
755	OG0004547	377.015	330.538	311.002	337.865	124.05	139.731	166.64	166.014	191.442	198.347	142.585	123.631	112.046	79.5138	199.498	196.123	361.948	272.739	0.759264	-0.759264	-0.478547	0.478547	-0.687115	0.687115	0.0217533	-0.0217533	-0.204766	0.204766	0.822993	-0.822993	1.963	-1.963	0.0986093	-0.0986093	1.62467	-1.62467	0.127891	1
81	OG0002936	534.482	527.212	1072.68	668.721	267.891	335.714	494.121	510.358	252.926	196.275	379.473	328.741	404.504	378.404	240.048	221.688	370.698	397.193	0.0659366	-0.0659366	2.23381	-2.23381	-1.08201	1.08201	-0.155656	0.155656	1.21444	-1.21444	0.68981	-0.68981	0.32102	-0.32102	0.38291	-0.38291	-0.332249	0.332249	0.127974	1
761	OG0004558	517.959	451.394	303.885	229.38	383.47	321.934	291.64	331.825	263.869	172.296	496.76	434.59	339.124	287.538	172.427	147.668	424.783	630.381	0.544363	-0.544363	1.10755	-1.10755	0.691534	-0.691534	-0.510946	0.510946	1.66434	-1.66434	0.529169	-0.529169	0.65256	-0.65256	0.613166	-0.613166	-1.54463	1.54463	0.129613	1
144	OG0003063	1116.52	1058.84	751.188	704.94	506.629	251.605	1365.26	1457.57	1196.5	1123.04	1575.64	1673	1832.56	1484.11	772.976	805.22	1087.44	1132.83	0.214685	-0.214685	0.257139	-0.257139	2.72302	-2.72302	-0.264763	0.264763	0.256416	-0.256416	-0.242631	0.242631	0.850572	-0.850572	-0.165411	0.165411	-0.165487	0.165487	0.129918	1
700	OG0004427	74.5424	81.4281	176.198	139.699	193.63	190.613	149.485	134.811	106.109	102.43	102.568	125.036	113.945	102.232	156.674	141.574	120.914	120.959	-0.702401	0.702401	1.83826	-1.83826	0.124941	-0.124941	0.821224	-0.821224	0.280665	-0.280665	-1.57056	1.57056	0.862039	-0.862039	0.805514	-0.805514	-0.00291835	0.00291835	0.13026	1
493	OG0003930	500.238	455.303	421.204	280.66	735.728	754.989	477.778	505.842	474.399	427.782	1545.49	1790.77	570.803	488.442	475.559	422.437	421.562	425.251	0.555437	-0.555437	2.36512	-2.36512	-0.152613	0.152613	-0.336994	0.336994	0.610306	-0.610306	-0.868379	0.868379	0.91838	-0.91838	0.698709	-0.698709	-0.0514646	0.0514646	0.131887	1
378	OG0003629	687.923	409.455	1345.47	1024.26	1341.71	1331.7	648.761	585.29	814.896	817.961	1278.71	964.69	1101.46	797.974	1053.19	906.278	902.093	1339.85	1.77208	-1.77208	0.946567	-0.946567	0.0261307	-0.0261307	0.359175	-0.359175	-0.0131068	0.0131068	0.977507	-0.977507	1.11579	-1.11579	0.52358	-0.52358	-1.36354	1.36354	0.132322	1
58	OG0002879	939.448	895.899	694.244	1048.03	1613.07	1837.55	1403.59	1636.71	1886.32	2114.56	1567.56	2074.57	1475.55	1533.43	1582.89	1747.1	2686.36	1724.81	0.195776	-0.195776	-1.67543	1.67543	-0.536757	0.536757	-0.632658	0.632658	-0.470683	0.470683	-1.14858	1.14858	-0.158704	0.158704	-0.406859	0.406859	1.79854	-1.79854	0.132408	1
752	OG0004539	2180.52	2836.24	2137.74	2738.31	1620.7	1621.45	709.649	908.735	1110.77	1232.71	788.844	1004.03	983.991	2377.96	1238.27	1351.8	2304.46	1314.83	-0.68102	0.68102	-0.641742	0.641742	-0.00121708	0.00121708	-0.640948	0.640948	-0.271111	0.271111	-0.62536	0.62536	-2.16036	2.16036	-0.228391	0.228391	1.42466	-1.42466	0.132997	1
577	OG0004130	1648.57	1408.41	236.014	225.105	300.181	319.246	381.741	478.671	1602.58	1443.79	1685.32	1482.63	1072.17	870.034	1200.68	1198.64	3186.73	2241.38	0.876138	-0.876138	0.263834	-0.263834	-0.343241	0.343241	-1.25634	1.25634	0.581306	-0.581306	0.71354	-0.71354	1.16066	-1.16066	0.00944906	-0.00944906	1.94224	-1.94224	0.134786	1
595	OG0004164	2208.09	3205.86	1065.69	1919.96	2939.57	2954.45	2022.87	2281.18	2049.06	2390.73	1471.85	1835.26	1064.3	1975.42	2881.03	3046.36	2670.46	1485.23	-0.965967	0.965967	-1.49971	1.49971	-0.0132331	0.0132331	-0.314556	0.314556	-0.40336	0.40336	-0.575967	0.575967	-1.57105	1.57105	-0.146193	0.146193	1.49487	-1.49487	0.136075	1
429	OG0003753	823.812	865.431	278.458	422.129	420.456	450.675	580.608	667.686	491.214	712.144	321.057	341.38	515.738	894.885	1081.67	1378.32	803.85	403.584	-0.135734	0.135734	-1.12978	1.12978	-0.191111	0.191111	-0.384303	0.384303	-1.01145	1.01145	-0.169014	0.169014	-1.48075	1.48075	-0.664362	0.664362	1.8263	-1.8263	0.136418	1
214	OG0003217	1010.11	1097.78	792.271	886.173	300.289	324.049	1250	1241.57	942.631	1056.57	959.488	1252.23	553.443	647.47	788.895	870.757	482.075	357.643	-0.50522	0.50522	-0.679574	0.679574	-0.462265	0.462265	0.0411029	-0.0411029	-0.692281	0.692281	-1.60776	1.60776	-0.951057	0.951057	-0.599145	0.599145	1.79997	-1.79997	0.137556	1
772	OG0004582	145.586	143.385	208.792	382.009	872.063	951.551	657.297	842.995	1098.98	1384.59	1190.86	1519.62	438.147	811.108	1152.39	1253.62	2065.09	936.244	0.0368436	-0.0368436	-1.4177	1.4177	-0.210768	0.210768	-0.598502	0.598502	-0.556057	0.556057	-0.586506	0.586506	-1.4436	1.4436	-0.203446	0.203446	1.81868	-1.81868	0.137724	1
1055	OG0005265	183.834	163.995	110.327	100.606	1000.88	1059.71	112.113	106.031	96.5647	98.8777	197.786	192.939	200.217	242.808	165.324	166.946	79.5489	177.367	0.413785	-0.413785	0.334365	-0.334365	-0.207122	0.207122	0.202295	-0.202295	-0.0858593	0.0858593	0.0900008	-0.0900008	-0.697465	0.697465	-0.0354118	0.0354118	-2.76224	2.76224	0.138312	1
67	OG0002908	66.7284	107.414	43.1457	65.913	1947.02	1703.27	113.643	117.341	311.867	258.441	240.563	216.359	320.947	229.671	145.794	123.053	314.218	245.413	-1.68088	1.68088	-1.50195	1.50195	0.480414	-0.480414	-0.115176	0.115176	0.673988	-0.673988	0.381117	-0.381117	1.19265	-1.19265	0.608563	-0.608563	0.88456	-0.88456	0.139196	1
296	OG0003409	655.188	856.469	587.912	1441.31	173.172	198.754	991.947	977.806	465.141	578.742	863.355	438.8	554.799	610.552	1416.69	1513.17	291.945	671.083	-0.562736	0.562736	-1.77737	1.77737	-0.290696	0.290696	0.0303398	-0.0303398	-0.459923	0.459923	1.37793	-1.37793	-0.202193	0.202193	-0.139176	0.139176	-1.66385	1.66385	0.139514	1
222	OG0003236	110.713	267.723	325.05	475.691	210.583	208.077	1315.4	1144.22	1006.36	791.024	788.84	736.174	1094.95	829.219	1125.15	907.549	984.028	915.134	-2.37315	2.37315	-1.07607	1.07607	0.0342314	-0.0342314	0.39808	-0.39808	0.685261	-0.685261	0.197533	-0.197533	0.78994	-0.78994	0.612321	-0.612321	0.207495	-0.207495	0.139803	1
1214	OG0005644	577.456	568.554	264.61	250.057	355.077	360.037	423.728	460.374	268.638	251.336	203.775	206.393	293.815	285.039	259.861	257.269	379.441	271.576	0.127636	-0.127636	0.464628	-0.464628	-0.113979	0.113979	-0.68111	0.68111	0.546766	-0.546766	-0.104892	0.104892	0.249102	-0.249102	0.0823405	-0.0823405	2.72252	-2.72252	0.141741	1
1049	OG0005243	844.872	983.613	1517.67	904.235	2252.87	2112.7	307.507	409.48	465.139	373.308	1242.83	1132.82	817.415	958.78	1082.93	1087.18	2939.52	1984.22	-0.57254	0.57254	1.91119	-1.91119	0.242269	-0.242269	-1.07316	1.07316	0.826426	-0.826426	0.349426	-0.349426	-0.600541	0.600541	-0.014785	0.014785	1.46399	-1.46399	0.142007	1
379	OG0003631	76.5162	87.3579	402.66	364.943	380.361	256.689	423.648	433.313	422.47	369.462	461.343	440.205	407.493	275.462	333.975	338.202	344.447	471.036	-0.578559	0.578559	0.429706	-0.429706	1.6977	-1.6977	-0.0986328	0.0986328	0.585354	-0.585354	0.205037	-0.205037	1.69062	-1.69062	-0.0550047	0.0550047	-1.35751	1.35751	0.142876	1
132	OG0003040	1212.54	1246.79	659.092	295.029	369.047	614.379	454.414	433.413	945.994	604.809	904.296	585.841	1525.23	733.018	203.934	169.739	486.84	835.494	-0.0572078	0.0572078	1.56759	-1.56759	-1.02488	1.02488	0.0971767	-0.0971767	0.903844	-0.903844	0.877973	-0.877973	1.44122	-1.44122	0.375951	-0.375951	-1.08321	1.08321	0.143404	1
291	OG0003401	815.156	405.301	896.044	330.202	1251.52	561.883	568.058	430.788	101.617	56.5468	873.934	587.246	1230.33	1158.63	139.314	133.93	99.4362	337.87	1.02777	-1.02777	1.41223	-1.41223	1.1639	-1.1639	0.420597	-0.420597	0.872119	-0.872119	0.600475	-0.600475	0.0918599	-0.0918599	0.0603053	-0.0603053	-1.66868	1.66868	0.143527	1
1009	OG0005155	369.207	324.987	377.685	476.127	137.017	136.664	3239.05	2618.76	119.864	140.915	85.554	86.1669	134.563	162.577	127.601	129.396	80.3444	84.3222	0.879232	-0.879232	-1.5914	1.5914	0.0178159	-0.0178159	1.46159	-1.46159	-1.11425	1.11425	-0.0492666	0.0492666	-1.30131	1.30131	-0.0963747	0.0963747	-0.333427	0.333427	0.143794	1
435	OG0003765	291.793	310.012	417.646	404.601	389.458	408.003	414.143	440.281	454.469	418.605	180.307	178.89	285.947	257.71	263.853	277.82	262.512	167.784	-0.372399	0.372399	0.195152	-0.195152	-0.286051	0.286051	-0.376301	0.376301	0.505297	-0.505297	0.0485371	-0.0485371	0.638901	-0.638901	-0.317192	0.317192	2.70801	-2.70801	0.145362	1
983	OG0005096	303.009	351.943	489.2	435.076	1360.97	1203.72	705.624	634.771	559.744	474.26	788.384	613.471	581.118	344.32	424.963	358.754	478.081	828.102	-0.510051	0.510051	0.399757	-0.399757	0.418568	-0.418568	0.360863	-0.360863	0.56438	-0.56438	0.851791	-0.851791	1.7468	-1.7468	0.576729	-0.576729	-1.82937	1.82937	0.145943	1
399	OG0003682	84.0279	83.599	123.189	127.336	462.273	517.009	446.038	449.368	392.999	394.027	321.517	369.492	417.529	366.686	259.639	250.929	299.104	358.811	0.0515095	-0.0515095	-0.333252	0.333252	-1.12531	1.12531	-0.0748742	0.0748742	-0.0263205	0.0263205	-1.39776	1.39776	1.30525	-1.30525	0.343449	-0.343449	-1.8271	1.8271	0.146152	1
201	OG0003191	747.211	733.492	1211.98	1065.27	575.849	246.943	465.045	414.024	238.324	244.826	209.285	223.847	349.159	306.696	389.455	447.05	256.148	266.342	0.0640232	-0.0640232	0.445168	-0.445168	2.76217	-2.76217	0.401051	-0.401051	-0.0929893	0.0929893	-0.232301	0.232301	0.447376	-0.447376	-0.475758	0.475758	-0.134818	0.134818	0.148357	1
1040	OG0005223	68.8581	63.2572	689.376	580.259	314.735	224.273	422.518	406.353	398.893	391.363	395.568	368.551	346.169	274.749	395.446	373.221	313.431	436.149	0.437142	-0.437142	0.886213	-0.886213	1.73059	-1.73059	0.201096	-0.201096	0.098259	-0.098259	0.364581	-0.364581	1.18608	-1.18608	0.298155	-0.298155	-1.68817	1.68817	0.14958	1
432	OG0003758	2661.13	767.083	557.192	369.513	655.496	597.23	450.307	390.497	273.132	255.19	574.035	406.015	614.216	503.354	544.129	466.078	271.254	469.297	2.34617	-2.34617	0.860023	-0.860023	0.197514	-0.197514	0.302075	-0.302075	0.144213	-0.144213	0.72803	-0.72803	0.421253	-0.421253	0.328097	-0.328097	-1.13564	1.13564	0.15002	1
442	OG0003784	229.991	279.511	124.812	112.185	401.935	398.024	285.681	244.275	209.691	236.833	229.984	211.671	284.316	215.823	223.909	188.768	213.199	260.527	-1.1586	1.1586	0.63515	-0.63515	0.0582816	-0.0582816	0.931392	-0.931392	-0.724595	0.724595	0.494291	-0.494291	1.63254	-1.63254	1.0151	-1.0151	-1.19095	1.19095	0.150275	1
1010	OG0005157	694.505	622.834	1872.07	1912.74	1536.11	1585.08	1173.73	1447.56	991.472	1269.12	1416.23	1707.42	1372.98	1568.23	2177.29	2212.48	3115.92	2283.91	0.616388	-0.616388	-0.121742	0.121742	-0.177756	0.177756	-1.18351	1.18351	-1.39152	1.39152	-1.05614	1.05614	-0.752075	0.752075	-0.0908178	0.0908178	1.74566	-1.74566	0.151578	1
666	OG0004335	308.385	269.981	231.893	204.87	199.604	203.197	197.889	182.575	120.144	136.472	90.6136	92.7231	78.6761	81.9986	78.7786	85.249	41.3655	113.399	0.401278	-0.401278	0.37391	-0.37391	-0.0538993	0.0538993	0.243255	-0.243255	-0.384515	0.384515	-0.0695346	0.0695346	-0.124968	0.124968	-0.238392	0.238392	-2.81282	2.81282	0.151791	1
143	OG0003062	381.515	288.163	317.748	261.143	781.507	915.592	715.702	610.81	840.671	673.493	1115.88	1022.76	1031.47	623.683	812.198	652.558	605.368	906.598	0.991996	-0.991996	0.695844	-0.695844	-0.562244	0.562244	0.56271	-0.56271	0.785706	-0.785706	0.309849	-0.309849	1.75328	-1.75328	0.775587	-0.775587	-1.41778	1.41778	0.153122	1
1145	OG0005481	1921.4	1896.38	777.223	1338.61	184.425	596.472	239.611	237.914	257.693	219.964	319.677	285.662	251.489	221.148	197.501	165.677	231.487	322.169	0.0303375	-0.0303375	-1.22787	1.22787	-2.44186	2.44186	0.0164485	-0.0164485	0.365531	-0.365531	0.260044	-0.260044	0.297086	-0.297086	0.405511	-0.405511	-0.757963	0.757963	0.153684	1
660	OG0004319	423.404	320.316	957.042	506.165	1587.73	1432.34	629.511	643.152	795.816	702.511	1133.82	1097.22	1654.37	2085.1	703.684	664.478	1404.83	1352.64	1.09775	-1.09775	2.44038	-2.44038	0.407474	-0.407474	-0.0848902	0.0848902	0.49318	-0.49318	0.129927	-0.129927	-0.912231	0.912231	0.226944	-0.226944	0.149869	-0.149869	0.154569	1
1034	OG0005204	46.4885	67.4541	86.7259	107.484	385.552	239.239	261.114	289.01	258.254	348.739	259.417	305.799	158.437	177.128	226.421	233.864	85.9129	113.98	-1.36379	1.36379	-0.792218	0.792218	1.73569	-1.73569	-0.375838	0.375838	-1.10489	1.10489	-0.608217	0.608217	-0.412824	0.412824	-0.119854	0.119854	-1.04071	1.04071	0.154706	1
320	OG0003466	227.129	197.322	1023.29	810.727	262.183	246.423	201.515	200.447	113.405	123.15	192.266	201.364	195.605	157.963	105.186	130.664	187.736	107.584	0.595434	-0.595434	0.982729	-0.982729	0.262728	-0.262728	0.0225388	-0.0225388	-0.349316	0.349316	-0.195958	0.195958	0.902713	-0.902713	-0.915966	0.915966	2.30127	-2.30127	0.154792	1
446	OG0003796	116.731	130.837	1442.06	1161.96	616.186	761.255	553.641	549.644	799.468	674.973	1070.8	870.571	792.187	531.394	553.003	513.78	1015.84	1259.6	-0.538006	0.538006	1.01565	-1.01565	-0.994426	0.994426	0.0342031	-0.0342031	0.797255	-0.797255	0.973845	-0.973845	1.86045	-1.86045	0.347171	-0.347171	-1.01151	1.01151	0.154807	1
717	OG0004458	138.234	103.969	327.111	273.915	314.338	342.952	592.543	637.295	370.82	319.428	420.852	385.433	613.674	592.097	393.005	356.729	236.26	253.548	2.00196	-2.00196	1.25247	-1.25247	-0.616025	0.616025	-0.514932	0.514932	1.05358	-1.05358	0.621626	-0.621626	0.253216	-0.253216	0.684697	-0.684697	-0.499454	0.499454	0.154927	1
1221	OG0005657	450.887	509.776	289.211	511.999	429.758	416.344	433.796	448.863	550.755	623.758	174.323	336.707	448.454	702.132	387.458	450.604	420.814	210.509	-0.301357	0.301357	-1.36698	1.36698	0.0779416	-0.0779416	-0.0839195	0.0839195	-0.305562	0.305562	-1.56212	1.56212	-1.08388	1.08388	-0.370419	0.370419	1.63763	-1.63763	0.155052	1
1019	OG0005173	225.339	211.865	271.456	272.39	285.899	277.916	573.454	540.555	504.435	460.051	495.578	559.752	806.026	621.911	584.959	532.801	496.385	528.032	0.540882	-0.540882	-0.0301479	0.0301479	0.248487	-0.248487	0.518285	-0.518285	0.807631	-0.807631	-1.0672	1.0672	2.26284	-2.26284	0.818926	-0.818926	-0.542148	0.542148	0.155605	1
1127	OG0005438	223.468	257.399	404.221	404.429	306.959	295.696	242.094	224.483	235.239	234.763	2986.57	696.355	275.366	247.071	393.008	417.111	280.8	305.892	-0.325636	0.325636	-0.0011881	0.0011881	0.0862469	-0.0862469	0.174193	-0.174193	0.00466844	-0.00466844	2.86982	-2.86982	0.249946	-0.249946	-0.137311	0.137311	-0.197378	0.197378	0.155862	1
721	OG0004464	399.357	399.8	925.574	745.555	379.474	270.474	141.108	149.15	105.547	101.838	208.365	193.407	655.996	511.874	82.9949	70.0259	102.61	148.291	-0.00516726	0.00516726	1.00445	-1.00445	1.56376	-1.56376	-0.258332	0.258332	0.166779	-0.166779	0.347149	-0.347149	1.15069	-1.15069	0.790269	-0.790269	-1.69766	1.69766	0.15602	1
578	OG0004131	241.778	277.393	807.319	622.924	242.266	223.369	771.503	783.013	296.153	290.709	316.002	340.453	450.347	338.374	253.865	255.239	170.235	190.161	-0.915527	0.915527	1.72063	-1.72063	0.541629	-0.541629	-0.0988128	0.0988128	0.123802	-0.123802	-0.497087	0.497087	1.8947	-1.8947	-0.0360435	0.0360435	-0.7379	0.7379	0.15618	1
88	OG0002953	1136.69	1456.1	476.524	586.954	482.945	580.781	993.797	735.044	799.036	784.494	459.448	468.57	397.995	341.135	1093.36	956.26	714.246	388.83	-0.913981	0.913981	-0.770397	0.770397	-0.682378	0.682378	1.11042	-1.11042	0.0681352	-0.0681352	-0.0729285	0.0729285	0.570742	-0.570742	0.496258	-0.496258	2.18872	-2.18872	0.156624	1
240	OG0003269	137.292	107.422	106.956	98.9515	195.581	194.666	173.808	206.911	160.283	137.662	171.568	142.831	377.1	321.257	150.68	142.335	155.12	168.644	1.64071	-1.64071	0.522551	-0.522551	0.0315023	-0.0315023	-1.16875	1.16875	1.02055	-1.02055	1.2286	-1.2286	1.07484	-1.07484	0.382805	-0.382805	-0.561472	0.561472	0.15685	1
460	OG0003844	351.216	300.627	297.579	284.666	423.378	68.7061	300.822	285.881	232.712	242.754	336.696	289.418	211.069	171.452	227.681	223.271	317.4	432.079	0.300478	-0.300478	0.085867	-0.085867	2.79057	-2.79057	0.0985999	-0.0985999	-0.0817649	0.0817649	0.292358	-0.292358	0.400992	-0.400992	0.0378636	-0.0378636	-0.592417	0.592417	0.158774	1
71	OG0002915	335.784	347.384	381.431	485.313	650.451	728.498	558.312	584.987	469.352	441.397	455.373	548.846	493.758	681.898	687.928	736.036	793.899	574.56	-0.174529	0.174529	-1.23197	1.23197	-0.581784	0.581784	-0.239823	0.239823	0.31551	-0.31551	-0.956776	0.956776	-1.64495	1.64495	-0.347273	0.347273	1.64753	-1.64753	0.159262	1
911	OG0004931	306.922	308.957	454.421	421.276	1303.71	1057.18	443.016	502.57	977.58	1041.33	568.906	687.172	485.895	349.293	750.949	756.331	886.175	572.81	-0.0305995	0.0305995	0.350584	-0.350584	0.967216	-0.967216	-0.583368	0.583368	-0.292493	0.292493	-0.872115	0.872115	1.51498	-1.51498	-0.0330761	0.0330761	1.98945	-1.98945	0.1598	1
1220	OG0005655	343.109	414.57	288.276	502.856	469.213	425.501	586.218	750.8	727.806	749.475	763.9	1130.8	480.139	483.33	971.97	1067.39	922.776	639.128	-0.661305	0.661305	-1.90177	1.90177	0.342558	-0.342558	-0.863102	0.863102	-0.102849	0.102849	-1.35777	1.35777	-0.0232282	0.0232282	-0.328053	0.328053	1.27334	-1.27334	0.159983	1
643	OG0004283	975.84	939.183	863.201	746.819	209.528	356.081	144.49	211.658	113.405	126.706	220.32	236.022	215.147	168.963	101.855	83.4704	205.236	298.32	0.134949	-0.134949	0.509619	-0.509619	-1.82671	1.82671	-1.32959	1.32959	-0.390538	0.390538	-0.242588	0.242588	0.847656	-0.847656	0.699379	-0.699379	-1.30322	1.30322	0.160111	1
987	OG0005105	204.862	203.892	181.507	159.421	171.403	202.852	151.095	156.32	106.392	120.785	135.23	157.817	162.507	141.634	111.4	104.531	105.8	150.035	0.0289485	-0.0289485	0.790259	-0.790259	-1.02503	1.02503	-0.207297	0.207297	-0.772796	0.772796	-0.940162	0.940162	0.837156	-0.837156	0.38799	-0.38799	-2.10915	2.10915	0.160121	1
783	OG0004602	1183.03	1303.08	740.843	952.646	1455.62	1352.02	1033.47	1166.03	1295.2	1528.76	1016.07	1334.65	1502.71	1466.38	1356.1	1334.3	1129.6	924.637	-0.582802	0.582802	-1.50957	1.50957	0.445361	-0.445361	-0.727477	0.727477	-0.998271	0.998271	-1.63576	1.63576	0.147687	-0.147687	0.0977896	-0.0977896	1.2043	-1.2043	0.160409	1
402	OG0003692	62.4097	150.477	225.023	142.658	258.136	233.761	245.41	233.371	223.449	174.072	159.181	141.379	301.951	234.282	100.191	81.4102	116.937	206.444	-2.04872	2.04872	1.10939	-1.10939	0.245405	-0.245405	0.124533	-0.124533	0.615147	-0.615147	0.293322	-0.293322	0.624959	-0.624959	0.51216	-0.51216	-1.37075	1.37075	0.161825	1
45	OG0002843	601.357	638.652	596.466	578.649	664.276	671.161	710.053	563.175	1532.97	1628.51	390.977	405.542	534.072	561.328	575.863	594.711	685.028	334.951	-0.239191	0.239191	0.120579	-0.120579	-0.0410025	0.0410025	0.917427	-0.917427	-0.240339	0.240339	-0.14542	0.14542	-0.197883	0.197883	-0.128051	0.128051	2.72955	-2.72955	0.162222	1
370	OG0003615	129.244	130.815	563	516.266	907.854	926.669	849.631	876.773	449.419	476.925	810.017	988.11	1518.99	1433.38	696.358	691.636	669.007	747.851	-0.135469	0.135469	0.97098	-0.97098	-0.229986	0.229986	-0.35254	0.35254	-0.66584	0.66584	-2.22095	2.22095	0.650224	-0.650224	0.0762989	-0.0762989	-1.24783	1.24783	0.162543	1
834	OG0004737	126.893	97.3926	436.432	423.119	1573.81	1658.73	338.031	284.264	402.821	373.897	607.613	497.328	524.959	320.895	650.205	633.532	602.981	802.515	1.12801	-1.12801	0.132829	-0.132829	-0.225295	0.225295	0.740972	-0.740972	0.31936	-0.31936	0.855976	-0.855976	2.06899	-2.06899	0.111387	-0.111387	-1.21751	1.21751	0.16267	1
105	OG0002982	54.5894	98.7029	228.834	140.047	260.656	254.633	128.061	158.541	133.338	96.8054	188.127	158.753	153.283	111.106	96.0877	75.1003	151.143	236.102	-1.60525	1.60525	1.34262	-1.34262	0.065206	-0.065206	-0.593229	0.593229	0.885465	-0.885465	0.472355	-0.472355	0.889849	-0.889849	0.683873	-0.683873	-1.22381	1.22381	0.162744	1
488	OG0003915	713.688	915.817	128.71	531.257	147.519	167.738	634.182	778.772	979.963	1726.21	237.808	372.77	202.93	424.898	820.959	929.158	497.976	112.23	-0.352034	0.352034	-1.73103	1.73103	-0.182016	0.182016	-0.290415	0.290415	-0.782599	0.782599	-0.627309	0.627309	-1.00337	1.00337	-0.175455	0.175455	1.79405	-1.79405	0.162944	1
750	OG0004533	129.653	93.8348	288.961	205.522	173.858	143.114	306.22	339.095	264.337	194.283	347.276	314.228	368.418	312.731	177.971	157.812	282.399	426.845	1.23237	-1.23237	1.29751	-1.29751	0.745829	-0.745829	-0.391742	0.391742	1.17457	-1.17457	0.384148	-0.384148	0.628656	-0.628656	0.461636	-0.461636	-1.56605	1.56605	0.163372	1
147	OG0003071	97.202	117.087	104.708	72.8753	125.847	141.043	127.416	115.927	140.075	124.044	145.35	110.05	145.686	97.9724	79.0005	54.8029	106.596	187.835	-0.581877	0.581877	1.124	-1.124	-0.357015	0.357015	0.296055	-0.296055	0.380586	-0.380586	0.866655	-0.866655	1.22789	-1.22789	1.13397	-1.13397	-1.73014	1.73014	0.165629	1
1193	OG0005606	180.397	185.285	316.435	183.712	295.089	239.74	261.115	330.209	453.349	441.397	469.162	349.351	286.218	287.173	388.569	360.278	501.962	594.326	-0.110167	0.110167	2.18744	-2.18744	0.853076	-0.853076	-0.963176	0.963176	0.110108	-0.110108	1.2066	-1.2066	-0.0137204	0.0137204	0.311417	-0.311417	-0.694496	0.694496	0.166087	1
206	OG0003201	1331.11	1409.75	2196.56	2869.04	757.208	852.864	1197.18	1300.36	473.958	423.8	1513.75	1487.78	806.297	783.42	1622.32	1611.93	928.32	958.947	-0.505716	0.505716	-2.3399	2.3399	-1.04717	1.04717	-0.72814	0.72814	0.984758	-0.984758	0.152472	-0.152472	0.253642	-0.253642	0.0566117	-0.0566117	-0.286033	0.286033	0.166112	1
118	OG0003014	583.605	643.377	632.867	567.373	196.669	255.634	751.692	759.28	338.816	294.857	227.684	216.354	704.287	733.369	217.473	188.004	497.181	307.049	-0.474956	0.474956	0.532019	-0.532019	-1.27106	1.27106	-0.0489657	0.0489657	0.676362	-0.676362	0.248777	-0.248777	-0.197231	0.197231	0.708586	-0.708586	2.305	-2.305	0.166987	1
949	OG0005015	511.822	593.945	111.201	183.974	978.232	1071.06	620.813	711.718	569.844	697.475	572.204	845.279	395.874	580.224	1075.17	1175.98	442.292	212.841	-0.408756	0.408756	-1.35692	1.35692	-0.249315	0.249315	-0.375471	0.375471	-0.554291	0.554291	-1.0603	1.0603	-1.03948	1.03948	-0.246457	0.246457	1.92765	-1.92765	0.168425	1
540	OG0004047	1660.24	1520.78	907.531	970.496	1146.7	1092.22	1003.06	906.715	635.533	600.072	632.451	544.626	844.816	723.434	678.827	686.054	559.229	640.267	0.839922	-0.839922	-0.642342	0.642342	0.466225	-0.466225	0.966534	-0.966534	0.549845	-0.549845	1.42948	-1.42948	1.48288	-1.48288	-0.101438	0.101438	-1.29437	1.29437	0.168541	1
278	OG0003360	584.724	616.232	385.553	400.26	677.733	672.833	379.913	390.597	368.852	405.28	444.329	568.983	411.829	502.091	919.41	935.747	386.608	312.865	-0.384673	0.384673	-0.274406	0.274406	0.0531895	-0.0531895	-0.203307	0.203307	-0.689962	0.689962	-1.8037	1.8037	-1.4481	1.4481	-0.129117	0.129117	1.5458	-1.5458	0.169722	1
1176	OG0005562	220.868	210.271	684.503	672.856	219.143	236.42	268.766	280.095	318.043	334.23	372.569	335.775	326.37	378.046	374.141	374.489	411.268	418.703	0.673545	-0.673545	0.235141	-0.235141	-1.0393	1.0393	-0.565637	0.565637	-0.680085	0.680085	1.42351	-1.42351	-2.01038	2.01038	-0.012758	0.012758	-0.245506	0.245506	0.16974	1
545	OG0004056	449.815	541.253	148.976	113.578	182.736	187.137	140.706	118.855	88.7048	99.1767	114.992	121.758	157.352	203.399	80.3297	70.5359	540.137	200.635	-0.519213	0.519213	0.758716	-0.758716	-0.0669663	0.0669663	0.473738	-0.473738	-0.313664	0.313664	-0.160822	0.160822	-0.718316	0.718316	0.36533	-0.36533	2.57918	-2.57918	0.171426	1
89	OG0002954	771.742	646.226	63.4366	73.6154	200.435	216.442	1033.02	986.237	546.548	494.684	779.93	639.869	728.706	572.925	394.781	342.264	436.724	477.438	1.16633	-1.16633	-0.978592	0.978592	-0.505937	0.505937	0.305286	-0.305286	0.656304	-0.656304	1.29982	-1.29982	1.57695	-1.57695	0.938839	-0.938839	-0.586838	0.586838	0.173325	1
76	OG0002923	125.942	174.947	415.834	397.679	410.747	356.834	620.247	499.656	234.675	221.735	264.481	172.334	261.259	170.742	224.574	179.885	129.665	240.173	-0.981081	0.981081	0.134432	-0.134432	0.423095	-0.423095	0.64864	-0.64864	0.170784	-0.170784	1.27073	-1.27073	1.26216	-1.26216	0.66557	-0.66557	-1.79991	1.79991	0.174105	1
1053	OG0005256	438.661	439.358	1782.16	1457.94	371.437	337.693	528.43	513.086	1234.29	1243.67	471.936	489.849	509.504	417.092	905.841	781.462	724.683	904.481	-0.0115111	0.0115111	1.45113	-1.45113	0.690089	-0.690089	0.21366	-0.21366	-0.0549332	0.0549332	-0.270107	0.270107	1.44633	-1.44633	1.06902	-1.06902	-1.60049	1.60049	0.174523	1
426	OG0003746	266.187	317.191	107.393	99.7795	517.467	313.55	599.471	647.898	403.101	301.074	517.928	566.173	564.84	528.195	327.985	304.461	693.675	844.967	-0.783414	0.783414	0.32931	-0.32931	2.19877	-2.19877	-0.34788	0.34788	1.29829	-1.29829	-0.398763	0.398763	0.30041	-0.30041	0.333299	-0.333299	-0.881077	0.881077	0.175185	1
114	OG0003001	1153.38	961.028	2565.81	1626.59	1293.39	1208.85	557.345	496.426	809.568	843.418	1341.7	1201.74	852.955	770.293	628.678	548.029	1106.53	1539.9	0.836622	-0.836622	2.06027	-2.06027	0.310687	-0.310687	0.53165	-0.53165	-0.188321	0.188321	0.506061	-0.506061	0.468314	-0.468314	0.6303	-0.6303	-1.50599	1.50599	0.175821	1
1114	OG0005405	54.8482	78.6532	91.7203	82.9307	233.622	238.272	125.564	130.67	109.48	122.268	106.253	98.811	110.418	115.717	116.504	120.008	84.3219	102.35	-2.34184	2.34184	0.660956	-0.660956	-0.129415	0.129415	-0.261732	0.261732	-0.724688	0.724688	0.476598	-0.476598	-0.307788	0.307788	-0.194614	0.194614	-1.26836	1.26836	0.175838	1
913	OG0004935	182.281	210.316	333.416	260.636	903.933	1027.54	593.347	661.43	664.727	438.442	799.424	602.227	611.235	462.525	453.361	359.52	625.247	945.578	-0.515495	0.515495	0.884415	-0.884415	-0.461975	0.461975	-0.39169	0.39169	1.48075	-1.48075	1.01561	-1.01561	0.999769	-0.999769	0.833364	-0.833364	-1.47211	1.47211	0.176153	1
710	OG0004446	796.437	999.564	437.439	623.185	1891.08	1616.55	738.562	1323.36	1891.71	2379.57	1154.06	1942.51	959.846	2491.55	3736.74	4492.43	3526.13	1226.46	-0.409801	0.409801	-0.63456	0.63456	0.28359	-0.28359	-1.02766	1.02766	-0.41386	0.41386	-0.922585	0.922585	-1.60803	1.60803	-0.332738	0.332738	1.75327	-1.75327	0.176578	1
366	OG0003603	65.69	87.8101	200.738	579.794	362.032	248.538	82.7964	137.738	494.61	789.248	207.436	375.538	459.574	831.704	782.238	761.659	583.881	214.01	-0.473539	0.473539	-1.59584	1.59584	0.610824	-0.610824	-0.818658	0.818658	-0.754135	0.754135	-0.947547	0.947547	-0.947005	0.947005	0.0438011	-0.0438011	1.5233	-1.5233	0.17778	1
714	OG0004452	724.957	818.125	428.01	382.966	1221.22	1119.02	1142.32	1094.44	852.806	944.96	1298.01	1438.14	1687.44	1198.86	1062.79	1036.35	740.601	742.32	-0.847316	0.847316	0.779471	-0.779471	0.612884	-0.612884	0.300393	-0.300393	-0.71936	0.71936	-0.718694	0.718694	2.37552	-2.37552	0.176785	-0.176785	-0.0162749	0.0162749	0.17897	1
299	OG0003421	369.931	346.177	110.515	107.265	1337.59	1273.5	370.106	383.201	417.359	429.147	514.248	511.85	386.259	410.288	453.146	431.319	1176.54	684.964	0.356284	-0.356284	0.160261	-0.160261	0.263608	-0.263608	-0.186717	0.186717	-0.149571	0.149571	0.0251036	-0.0251036	-0.324005	0.324005	0.265053	-0.265053	2.83633	-2.83633	0.179724	1
171	OG0003126	1294.02	1334.43	900.288	1014.51	1018.32	1017.8	647.095	611.242	507.242	602.15	794.819	777.371	1103.09	900.217	774.469	837.518	373.077	618.157	-0.15378	0.15378	-0.596632	0.596632	0.00257325	-0.00257325	0.284983	-0.284983	-0.855667	0.855667	0.111007	-0.111007	1.0129	-1.0129	-0.391206	0.391206	-2.47299	2.47299	0.180175	1
381	OG0003638	1441.21	1436.87	748.002	1253.38	601.203	433.22	1220.12	1044.96	1976.04	1944.39	729.973	492.191	698.318	620.499	993.054	947.885	633.21	501.281	0.0112977	-0.0112977	-1.89091	1.89091	1.21606	-1.21606	0.579079	-0.579079	0.0604559	-0.0604559	1.45692	-1.45692	0.441866	-0.441866	0.174268	-0.174268	0.870812	-0.870812	0.180256	1
1027	OG0005195	865.305	685.635	232.083	263.932	806.614	844.655	529.318	481.163	576.303	626.423	289.315	323.117	531.59	429.162	365.71	312.075	606.163	350.658	1.00004	-1.00004	-0.554291	0.554291	-0.198868	0.198868	0.411382	-0.411382	-0.35973	0.35973	-0.476447	0.476447	0.920334	-0.920334	0.683119	-0.683119	2.30518	-2.30518	0.180502	1
64	OG0002898	53.18	75.5322	483.267	460.282	291.136	272.496	50.0967	60.8919	75.792	79.0459	243.323	328.272	193.977	171.803	117.502	93.7891	62.8437	270.413	-0.740056	0.740056	0.103808	-0.103808	0.140931	-0.140931	-0.414495	0.414495	-0.0895537	0.0895537	-0.63334	0.63334	0.25834	-0.25834	0.478267	-0.478267	-2.65429	2.65429	0.180749	1
749	OG0004532	591.201	662.114	597.091	622.835	278.048	384.603	289.546	330.413	475.241	484.323	534.482	531.05	564.569	474.598	251.648	256.762	448.656	465.22	-0.806116	0.806116	-0.300657	0.300657	-2.29099	2.29099	-0.939169	0.939169	-0.13484	0.13484	0.0458893	-0.0458893	1.23353	-1.23353	-0.143315	0.143315	-0.258234	0.258234	0.181491	1
303	OG0003426	683.339	735.014	728.085	485.878	726.551	543.748	548.681	712.922	376.992	334.227	400.172	395.712	509.224	533.165	272.064	274.015	519.455	485.58	-0.366243	0.366243	2.00565	-2.00565	1.44661	-1.44661	-1.30868	1.30868	0.60445	-0.60445	0.0563284	-0.0563284	-0.230876	0.230876	-0.035916	0.035916	0.338822	-0.338822	0.181737	1
87	OG0002952	343.18	310.688	200.238	219.758	97.0297	148.077	381.282	369.29	320.014	305.813	444.779	423.351	437.876	353.556	318.887	334.907	265.686	405.91	0.447258	-0.447258	-0.418325	0.418325	-1.87446	1.87446	0.143797	-0.143797	0.204225	-0.204225	0.22216	-0.22216	0.958912	-0.958912	-0.220536	0.220536	-1.87922	1.87922	0.181996	1
1118	OG0005412	1184.63	840.815	415.21	572.687	702.751	765.42	1201.87	1024.22	675.391	746.023	371.654	400.39	508.413	613.034	1169.7	961.842	372.297	396.605	1.69271	-1.69271	-1.58956	1.58956	-0.425647	0.425647	0.79576	-0.79576	-0.49551	0.49551	-0.371165	0.371165	-0.930276	0.930276	0.972384	-0.972384	-0.315249	0.315249	0.182008	1
20	OG0002793	97.7695	179.77	729.708	763.538	1607.16	1543.41	1543	1332.66	1533.52	1518.09	715.25	677.155	939.498	628.297	1396.93	1181.81	1225.85	1574.21	-2.17967	2.17967	-0.167135	0.167135	0.149255	-0.149255	0.539609	-0.539609	0.0372975	-0.0372975	0.201837	-0.201837	1.46437	-1.46437	0.615405	-0.615405	-0.917827	0.917827	0.182398	1
273	OG0003348	15048.8	14915.3	7807.14	9076.11	8013.53	7830.78	11962.6	11104.1	11515.9	11808.2	4280.91	4728.88	2565.93	1963.71	18084.7	19021.2	6830.07	1824.24	0.0215617	-0.0215617	-0.363858	0.363858	0.0558385	-0.0558385	0.180154	-0.180154	-0.0606643	0.0606643	-0.240693	0.240693	0.643615	-0.643615	-0.12218	0.12218	2.80014	-2.80014	0.182855	1
775	OG0004591	169.269	212.446	308.317	259.589	248.689	267.519	207.637	227.207	199.586	175.259	77.7345	55.2545	222.195	206.242	122.275	115.695	132.847	155.269	-1.29845	1.29845	0.984942	-0.984942	-0.418732	0.418732	-0.51661	0.51661	0.744972	-0.744972	1.9404	-1.9404	0.427415	-0.427415	0.317426	-0.317426	-0.893362	0.893362	0.183448	1
807	OG0004660	1063.6	954.211	786.029	713.995	657.48	858.566	1288.18	1320.03	881.433	806.122	1259.4	1034.47	926.75	570.799	912.5	902.896	669.794	663.523	0.523551	-0.523551	0.463761	-0.463761	-1.28092	1.28092	-0.117934	0.117934	0.430978	-0.430978	0.946964	-0.946964	2.29543	-2.29543	0.051092	-0.051092	0.0454239	-0.0454239	0.184607	1
510	OG0003976	460.862	484.494	338.037	289.498	417.758	347.847	839.722	826.132	573.21	434.884	967.772	808.278	688.549	570.788	547.4	538.763	564.002	855.429	-0.239158	0.239158	0.740013	-0.740013	0.873623	-0.873623	0.0780468	-0.0780468	1.31275	-1.31275	0.859151	-0.859151	0.894621	-0.894621	0.076075	-0.076075	-1.96425	1.96425	0.184916	1
600	OG0004190	581.99	507.341	257.742	425.02	888.974	720.211	647.068	662.137	452.313	465.646	618.661	746.463	609.336	1330.8	908.397	926.748	870.91	636.371	0.401655	-0.401655	-1.43602	1.43602	0.614696	-0.614696	-0.0674631	0.0674631	-0.0851312	0.0851312	-0.548725	0.548725	-2.17957	2.17957	-0.05861	0.05861	0.912032	-0.912032	0.18549	1
552	OG0004075	77.1461	104.648	654.971	568.465	135.201	173.527	211.797	227.008	186.392	232.386	259.891	259.442	214.053	141.989	180.638	205.765	39.7745	135.497	-0.697338	0.697338	0.325937	-0.325937	-0.572247	0.572247	-0.159789	0.159789	-0.50627	0.50627	0.00398452	-0.00398452	0.933008	-0.933008	-0.299749	0.299749	-2.5175	2.5175	0.185508	1
850	OG0004783	681.902	569.521	453.048	384.359	472.093	510.039	1147.55	1240.25	1166.64	900.847	1184.41	1207.28	1336.68	1318.73	870.339	916.68	1475.84	1275.18	1.30178	-1.30178	1.18906	-1.18906	-0.560069	0.560069	-0.562787	0.562787	1.86359	-1.86359	-0.138591	0.138591	0.0979783	-0.0979783	-0.375913	0.375913	1.05735	-1.05735	0.18603	1
748	OG0004523	271.613	212.796	356.269	564.196	1761.2	1764.35	1004.35	1090.91	1720.16	2063.64	855.084	1072.4	797.344	917.607	1931.52	2084.03	1837.58	1163.06	0.928608	-0.928608	-1.72761	1.72761	-0.00685136	0.00685136	-0.315943	0.315943	-0.694263	0.694263	-0.862282	0.862282	-0.536319	0.536319	-0.290477	0.290477	1.7192	-1.7192	0.187543	1
831	OG0004718	207.045	152.873	172.829	132.387	154.95	153.807	494.756	354.042	256.011	253.411	283.8	260.365	578.134	440.169	240.33	214.645	186.94	287.271	1.19036	-1.19036	1.04792	-1.04792	0.0292621	-0.0292621	1.31112	-1.31112	0.0403719	-0.0403719	0.340605	-0.340605	1.07151	-1.07151	0.446485	-0.446485	-1.67329	1.67329	0.187569	1
250	OG0003289	92.0664	89.727	440.31	452.712	2540.29	2461.5	330.864	374.037	1017.79	994.224	695.011	715.096	726.533	617.648	925.154	935.455	1239.37	693.768	0.124409	-0.124409	-0.134261	0.134261	0.152293	-0.152293	-0.59211	0.59211	0.11324	-0.11324	-0.137701	0.137701	0.783108	-0.783108	-0.0535264	0.0535264	2.72852	-2.72852	0.187794	1
592	OG0004160	217.51	207.912	348.652	299.293	1614.89	1584.71	641.51	691.926	691.92	579.932	879.2	848.875	1151.11	751.835	704.13	651.797	619.694	803.108	0.235464	-0.235464	0.795102	-0.795102	0.098447	-0.098447	-0.394635	0.394635	0.919035	-0.919035	0.183165	-0.183165	2.19	-2.19	0.402844	-0.402844	-1.34551	1.34551	0.188517	1
459	OG0003841	243.216	238.151	92.532	98.8649	21.8863	147.328	135.774	186.613	178.254	169.042	61.1757	80.0837	128.055	108.267	106.737	104.278	265.693	189.58	0.0386654	-0.0386654	-0.121601	0.121601	-2.7244	2.7244	-0.579542	0.579542	0.0974821	-0.0974821	-0.491919	0.491919	0.30773	-0.30773	0.0428342	-0.0428342	0.614408	-0.614408	0.188934	1
806	OG0004659	49.5941	71.2398	225.656	258.296	192.542	76.0846	379.109	418.67	382.615	391.366	304.959	336.229	402.333	382.302	310.01	289.489	385.812	289.615	-1.04108	1.04108	-0.391966	0.391966	2.51954	-2.51954	-0.288199	0.288199	-0.0657099	0.0657099	-0.283433	0.283433	0.148372	-0.148372	0.198941	-0.198941	0.827729	-0.827729	0.189241	1
32	OG0002815	1014.72	771.836	495.98	331.424	1242.04	1195.25	260.632	275.881	497.502	456.764	465.487	469.699	495.659	619.785	325.322	328.817	888.562	624.56	1.22959	-1.22959	1.79879	-1.79879	0.173654	-0.173654	-0.257072	0.257072	0.386106	-0.386106	-0.0407296	0.0407296	-1.00646	1.00646	-0.0483265	0.0483265	1.57803	-1.57803	0.18983	1
93	OG0002959	592.433	599.815	994.008	1032.88	292.839	261.122	300.822	301.127	361.834	374.788	298.979	255.691	239.826	203.399	195.504	175.319	253.769	296.582	-0.112274	0.112274	-0.347749	0.347749	1.03816	-1.03816	-0.0092074	0.0092074	-0.318859	0.318859	1.41508	-1.41508	1.49022	-1.49022	0.987006	-0.987006	-1.41052	1.41052	0.190428	1
839	OG0004750	176.571	413.084	315.559	94.5176	641.078	539.154	183.956	190.504	236.188	196.838	331.637	553.06	329.083	394.019	65.688	70.0285	1598.93	732.138	-1.42078	1.42078	1.90933	-1.90933	0.305901	-0.305901	-0.0619373	0.0619373	0.321887	-0.321887	-0.886546	0.886546	-0.318096	0.318096	-0.113285	0.113285	1.31714	-1.31714	0.192531	1
16	OG0002785	383.984	399.415	794.52	655.137	516.206	629.904	203.609	189.139	266.111	260.519	346.82	321.257	692.35	397.928	199.944	167.2	138.415	173.297	-0.16875	0.16875	0.823724	-0.823724	-0.849891	0.849891	0.315652	-0.315652	0.0909789	-0.0909789	0.327809	-0.327809	2.31352	-2.31352	0.764093	-0.764093	-0.958698	0.958698	0.192814	1
248	OG0003286	142.811	138.986	585.228	751.989	147.958	150.799	152.545	143.596	189.761	178.812	216.18	193.871	189.365	145.184	223.245	196.377	248.193	236.69	0.191528	-0.191528	-1.75979	1.75979	-0.134185	0.134185	0.426439	-0.426439	0.419205	-0.419205	0.767746	-0.767746	1.86359	-1.86359	0.903539	-0.903539	0.334772	-0.334772	0.193572	1
505	OG0003962	134.049	98.8798	248.377	168.519	190.232	166.956	326.756	298.199	343.871	355.841	240.103	240.701	210.258	172.158	133.369	117.471	145.567	203.536	1.34175	-1.34175	1.70225	-1.70225	0.579097	-0.579097	0.406066	-0.406066	-0.15202	0.15202	-0.0110452	0.0110452	0.885356	-0.885356	0.56321	-0.56321	-1.47564	1.47564	0.196025	1
956	OG0005032	2354.88	2584.6	526.533	947.727	660.001	456.114	2236.95	2721.05	1060.81	1611.65	1198.21	2026.32	1535	2082.26	4293.1	5073.58	2029.29	1052.52	-0.224296	0.224296	-1.37791	1.37791	0.881038	-0.881038	-0.470915	0.470915	-0.994095	0.994095	-1.23862	1.23862	-0.729674	0.729674	-0.401875	0.401875	1.52864	-1.52864	0.196215	1
503	OG0003958	103.479	63.84	194.368	231.73	147.538	238.86	334.489	339.299	373.907	295.742	500.44	466.893	761.151	1028.86	357.945	324.761	545.706	578.625	1.72599	-1.72599	-0.638832	0.638832	-1.72189	1.72189	-0.0520172	0.0520172	0.850414	-0.850414	0.25266	-0.25266	-1.08962	1.08962	0.354136	-0.354136	-0.213313	0.213313	0.197819	1
548	OG0004061	1686.28	1556.45	397.791	505.992	1327.79	1319.8	780.445	832.19	909.639	972.228	721.395	919.733	778.625	1385.1	1921.19	2056.63	1194.96	748.979	0.287339	-0.287339	-0.859165	0.859165	0.0216531	-0.0216531	-0.230272	0.230272	-0.23868	0.23868	-0.867308	0.867308	-2.0115	2.0115	-0.244356	0.244356	1.64643	-1.64643	0.198754	1
36	OG0002826	253.371	116.793	646.354	51.6309	238.196	342.728	480.669	346.769	364.925	319.431	1033.55	399.927	187.195	381.24	353.281	300.15	614.905	710.057	0.962612	-0.962612	2.22296	-2.22296	-0.469454	0.469454	0.422191	-0.422191	0.173432	-0.173432	1.15319	-1.15319	-0.890604	0.890604	0.212134	-0.212134	-0.187359	0.187359	0.199386	1
172	OG0003132	149.275	98.5558	446.179	579.565	500.117	493.347	343.025	343.136	364.644	382.488	269.541	350.751	269.946	245.996	693.467	670.575	380.252	358.806	2.11178	-2.11178	-1.34184	1.34184	0.0703211	-0.0703211	-0.00166044	0.00166044	-0.246446	0.246446	-1.35096	1.35096	0.478999	-0.478999	0.173177	-0.173177	0.299437	-0.299437	0.201066	1
804	OG0004657	540.335	514.395	392.607	252.844	282.062	281.858	132.167	107.242	68.4935	67.7904	229.984	209.325	196.145	150.867	167.987	142.079	108.982	175.041	0.192545	-0.192545	1.69529	-1.69529	0.00283511	-0.00283511	0.815127	-0.815127	0.0403936	-0.0403936	0.368177	-0.368177	1.02155	-1.02155	0.654174	-0.654174	-1.82093	1.82093	0.201179	1
151	OG0003078	119.316	159.007	1423.95	1514.75	732.759	1868.83	1513.93	1813.23	1627.84	1458	1349.08	1611.88	1203.2	1262.27	1273.67	1259.08	1821.67	1348.58	-0.825189	0.825189	-0.178785	0.178785	-2.52686	2.52686	-0.520518	0.520518	0.318473	-0.318473	-0.513573	0.513573	-0.138644	0.138644	0.0333394	-0.0333394	0.863505	-0.863505	0.202228	1
794	OG0004631	129.238	79.0561	180.571	144.551	168.014	180.225	112.194	116.836	127.159	127.298	211.125	214.012	247.968	198.426	175.976	171.005	237.064	245.994	2.41108	-2.41108	1.10875	-1.10875	-0.350925	0.350925	-0.202832	0.202832	-0.00543527	0.00543527	-0.0679664	0.0679664	1.1107	-1.1107	0.143361	-0.143361	-0.185015	0.185015	0.20544	1
508	OG0003967	331.422	411.622	481.207	1624.24	412.147	427.742	916.157	927.92	452.787	710.498	173.868	295.496	257.189	599.193	704.791	1028.32	540.137	108.165	-0.305457	0.305457	-1.5364	1.5364	-0.0525464	0.0525464	-0.0180529	0.0180529	-0.626954	0.626954	-0.733356	0.733356	-1.13019	1.13019	-0.528289	0.528289	1.88568	-1.88568	0.205934	1
129	OG0003032	714.361	720.967	435.129	325.335	184.846	223.865	2045.51	1657.41	338.251	393.145	851.4	824.669	548.831	493.049	557	503.885	740.593	714.808	-0.0585355	0.0585355	1.8364	-1.8364	-1.2143	1.2143	1.33309	-1.33309	-0.954633	0.954633	0.202859	-0.202859	0.680985	-0.680985	0.63682	-0.63682	0.225343	-0.225343	0.207363	1
400	OG0003688	394.517	387.073	256.617	200.647	179.156	171.058	158.828	150.059	81.9677	84.0756	80.9543	91.7865	231.69	227.179	82.3292	84.2366	126.483	115.725	0.184291	-0.184291	2.36817	-2.36817	0.44736	-0.44736	0.54928	-0.54928	-0.245616	0.245616	-1.21323	1.21323	0.190219	-0.190219	-0.221561	0.221561	0.859328	-0.859328	0.208715	1
265	OG0003319	77.0183	51.2737	148.935	127.96	768.648	392.949	92.3808	84.7236	35.9114	71.0291	280.175	342.565	211.614	239.961	311.122	397.321	50.9113	143.057	0.815426	-0.815426	0.307809	-0.307809	1.31426	-1.31426	0.175687	-0.175687	-1.33439	1.33439	-0.407101	0.407101	-0.255079	0.255079	-0.494418	0.494418	-1.93038	1.93038	0.209911	1
922	OG0004956	2483.6	1001.63	286.338	515.047	581.697	564.532	284.632	387.769	617.565	698.064	279.2	386.814	544.764	629.007	534.361	586.848	505.931	266.923	1.91555	-1.91555	-1.28566	1.28566	0.0674628	-0.0674628	-0.690987	0.690987	-0.275642	0.275642	-0.727899	0.727899	-0.323323	0.323323	-0.210888	0.210888	1.39316	-1.39316	0.211387	1
1135	OG0005461	1399.08	1693.45	1206.71	1587.67	2994.25	2997.11	1298	1580.67	1175	1563.39	701.911	991.388	1149.48	1479.52	2253.51	2381.89	1623.9	872.688	-0.63055	0.63055	-0.903119	0.903119	-0.00315955	0.00315955	-0.65047	0.65047	-0.939568	0.939568	-1.13248	1.13248	-0.831616	0.831616	-0.183475	0.183475	1.99327	-1.99327	0.213074	1
1143	OG0005475	78.7145	64.6702	61.2519	47.7116	150.123	163.028	101.483	84.3197	94.5997	77.5627	97.5131	80.079	117.203	114.301	101.192	82.7118	65.2301	97.6975	0.882698	-0.882698	1.11986	-1.11986	-0.37137	0.37137	0.832454	-0.832454	0.891804	-0.891804	0.884691	-0.884691	0.112963	-0.112963	0.905574	-0.905574	-1.79584	1.79584	0.214448	1
117	OG0003005	413.155	351.443	156.842	163.817	466.403	389.595	1248.39	1131.8	1461.1	1337.81	1286.53	1389.45	1084.64	888.496	808.865	715.231	618.891	758.9	1.11123	-1.11123	-0.299484	0.299484	1.2354	-1.2354	0.674406	-0.674406	0.606492	-0.606492	-0.529514	0.529514	1.36868	-1.36868	0.845852	-0.845852	-1.39909	1.39909	0.214467	1
602	OG0004198	126.98	128.28	380.308	371.645	229.164	261.992	453.429	421.396	355.667	298.412	298.059	252.413	267.23	233.231	327.093	257.52	295.922	378.578	-0.0637015	0.0637015	0.144139	-0.144139	-0.836243	0.836243	0.458119	-0.458119	1.09519	-1.09519	1.03748	-1.03748	0.849979	-0.849979	1.48895	-1.48895	-1.53321	1.53321	0.214832	1
174	OG0003135	446.095	290.517	195.43	241.655	263.424	308.587	394.519	375.244	257.409	279.454	138.91	159.221	341.02	291.077	231.898	190.034	137.62	179.694	1.92194	-1.92194	-0.962369	0.962369	-0.718461	0.718461	0.227857	-0.227857	-0.373649	0.373649	-0.619953	0.619953	0.718985	-0.718985	0.902864	-0.902864	-1.20658	1.20658	0.215493	1
724	OG0004473	592.76	557.25	573.554	311.003	520.146	478.848	365.577	346.267	269.766	224.103	320.142	310.014	405.592	290.009	216.144	216.17	213.191	350.083	0.20819	-0.20819	2.00125	-2.00125	0.278731	-0.278731	0.182896	-0.182896	0.623405	-0.623405	0.108371	-0.108371	1.12033	-1.12033	-0.000398493	0.000398493	-1.63859	1.63859	0.218846	1
664	OG0004332	209.047	72.0356	875.875	1101.99	586.701	585.948	1076.03	1043.64	692.795	696.584	1887.71	1884.44	1344.82	1482.72	3940.48	3607.86	1026.98	1064.79	2.81117	-2.81117	-0.659321	0.659321	0.00370155	-0.00370155	0.088118	-0.088118	-0.0157272	0.0157272	0.00499894	-0.00499894	-0.281264	0.281264	0.254139	-0.254139	-0.104243	0.104243	0.219942	1
364	OG0003598	738.066	302.322	468.47	1168.88	11495.7	11073.1	172.037	198.227	608.018	236.54	1592.33	1820.56	5935.98	5470.83	1799.21	2160.45	99.4362	611.766	1.16925	-1.16925	-1.19422	1.19422	0.0522676	-0.0522676	-0.197469	0.197469	1.22794	-1.22794	-0.186693	0.186693	0.113842	-0.113842	-0.25469	0.25469	-2.01108	2.01108	0.220344	1
1063	OG0005280	175.499	167.617	308.13	337.821	0	261.715	460.052	416.246	272.29	293.969	280.125	259.91	231.959	175.711	292.477	267.672	153.529	195.976	0.0655533	-0.0655533	-0.131172	0.131172	-2.85371	2.85371	0.142655	-0.142655	-0.109252	0.109252	0.10682	-0.10682	0.393736	-0.393736	0.126373	-0.126373	-0.346579	0.346579	0.220857	1
486	OG0003913	163.905	205.888	212.289	168.648	231.941	213.827	88.0316	81.4922	910.984	916.637	108.557	105.367	98.7521	97.6174	101.192	90.577	82.7309	102.35	-1.58304	1.58304	1.5974	-1.5974	0.566617	-0.566617	0.537884	-0.537884	-0.0431336	0.0431336	0.207916	-0.207916	0.0805711	-0.0805711	0.771805	-0.771805	-1.47806	1.47806	0.221434	1
842	OG0004759	1054.87	1496.03	717.889	1185.38	113.833	164.7	1077.08	1313.27	1528.75	1923.09	264.385	561.888	801.142	1344.98	1818.78	1981.28	1020.61	280.88	-0.618248	0.618248	-0.878062	0.878062	-0.652852	0.652852	-0.353224	0.353224	-0.408383	0.408383	-1.28713	1.28713	-0.90588	0.90588	-0.152862	0.152862	2.03183	-2.03183	0.221697	1
255	OG0003298	532.639	417.586	859.517	609.777	692.832	787.75	466.334	486.126	730.874	566.936	736.413	701.033	564.843	653.859	596.057	530.52	832.87	832.173	1.30319	-1.30319	1.82944	-1.82944	-0.690005	0.690005	-0.223653	0.223653	1.35958	-1.35958	0.264909	-0.264909	-0.786156	0.786156	0.626122	-0.626122	0.00450214	-0.00450214	0.221942	1
819	OG0004688	320.617	314.674	680.383	442.432	116.564	138.992	193.943	174.596	200.431	181.476	169.723	147.982	207	163.284	173.539	183.184	188.523	236.102	0.0909991	-0.0909991	2.0615	-2.0615	-0.853723	0.853723	0.510645	-0.510645	0.482794	-0.482794	0.665675	-0.665675	1.14844	-1.14844	-0.263	0.263	-1.08997	1.08997	0.222351	1
160	OG0003100	64.265	94.1529	1170.78	694.54	1241.23	726.471	830.703	764.835	723.954	634.709	1609.64	1524.26	909.661	1012.03	467.124	400.873	447.861	750.759	-1.10341	1.10341	1.4932	-1.4932	1.52999	-1.52999	0.241444	-0.241444	0.384169	-0.384169	0.159335	-0.159335	-0.311542	0.311542	0.446395	-0.446395	-1.47796	1.47796	0.222447	1
642	OG0004282	337.337	316.905	72.801	61.1652	159.669	134.068	280.607	307.186	581.914	575.207	504.584	514.192	304.938	294.272	445.598	445.527	301.491	314.028	0.66031	-0.66031	1.83641	-1.83641	1.84273	-1.84273	-0.956076	0.956076	0.12255	-0.12255	-0.199381	0.199381	0.376336	-0.376336	0.00168293	-0.00168293	-0.430648	0.430648	0.222509	1
827	OG0004706	103.968	143.49	206.232	44.9267	387.115	119.364	62.2737	85.4275	272.009	197.459	612.681	692.613	314.704	425.612	50.8177	107.576	2391.24	1277.05	-0.462384	0.462384	1.85938	-1.85938	1.53052	-1.53052	-0.453844	0.453844	0.459737	-0.459737	-0.177288	0.177288	-0.433723	0.433723	-1.03743	1.03743	0.879361	-0.879361	0.222953	1
582	OG0004144	202.558	159.596	287.151	187.804	157.676	202.721	169.941	161.368	117.057	106.276	139.37	140.958	217.04	158.673	85.882	66.2177	110.573	141.894	0.949372	-0.949372	1.67395	-1.67395	-1.00025	1.00025	0.207096	-0.207096	0.386318	-0.386318	-0.0453238	0.0453238	1.24325	-1.24325	1.03465	-1.03465	-0.992825	0.992825	0.224612	1
722	OG0004465	332.647	333.608	329.296	281.62	300.611	174.844	527.625	506.523	281.556	268.509	479.286	458.928	392.841	289.306	400.109	393.264	226.715	353.572	-0.0109121	0.0109121	0.590597	-0.590597	2.00183	-2.00183	0.154424	-0.154424	0.179503	-0.179503	0.164216	-0.164216	1.14863	-1.14863	0.0652884	-0.0652884	-1.65442	1.65442	0.22485	1
487	OG0003914	390.476	478.85	1241.84	1577.8	805.148	762.907	518.766	501.578	1384.47	1344.32	941.526	901.943	1316.33	1029.06	1497.9	1299.79	1135.95	1093.86	-1.3731	1.3731	-1.60936	1.60936	0.363863	-0.363863	0.227526	-0.227526	0.198747	-0.198747	0.290028	-0.290028	1.65437	-1.65437	0.956462	-0.956462	0.254951	-0.254951	0.2251	1
365	OG0003600	605.856	546.934	823.87	538.162	1703.36	1847.7	1114.13	1149.07	762.386	634.306	938.334	890.24	992.941	914.767	770.696	729.437	788.33	971.159	0.559892	-0.559892	2.29778	-2.29778	-0.445236	0.445236	-0.169118	0.169118	1.00451	-1.00451	0.288106	-0.288106	0.448873	-0.448873	0.301278	-0.301278	-1.13824	1.13824	0.227271	1
1120	OG0005417	78.9952	90.6688	331.92	259.458	1594.6	1275.05	3257.09	2459.41	1939.15	1902.65	2077.67	1383.83	2978.3	1944.19	1599.09	1456.08	824.119	1792.86	-0.382355	0.382355	0.680915	-0.680915	0.618806	-0.618806	0.775442	-0.775442	0.0527993	-0.0527993	1.11391	-1.11391	1.16744	-1.16744	0.260132	-0.260132	-2.05712	2.05712	0.227636	1
397	OG0003677	280.275	186.485	276.974	267.603	509.994	539.023	650.715	645.161	606.617	528.137	680.743	580.854	570.261	434.12	696.582	621.351	659.453	858.33	1.93872	-1.93872	0.166034	-0.166034	-0.266995	0.266995	0.0413574	-0.0413574	0.667282	-0.667282	0.763921	-0.763921	1.30779	-1.30779	0.550755	-0.550755	-1.26423	1.26423	0.228169	1
170	OG0003125	240.082	303.727	211.85	191.418	153.4	123.788	230.348	226.401	149.903	157.793	304.043	314.701	595.225	413.543	319.553	301.923	254.557	317.517	-1.25382	1.25382	0.542802	-0.542802	1.1445	-1.1445	0.0925809	-0.0925809	-0.274713	0.274713	-0.184536	0.184536	1.92947	-1.92947	0.303894	-0.303894	-1.17904	1.17904	0.228464	1
208	OG0003207	346.211	330.784	292.209	283.883	743.256	791.566	373.631	345.156	196.217	178.51	463.187	441.128	280.521	228.961	357.499	362.562	272.861	308.794	0.467184	-0.467184	0.29629	-0.29629	-0.645287	0.645287	0.812149	-0.812149	0.968767	-0.968767	0.5001	-0.5001	2.07474	-2.07474	-0.144134	0.144134	-1.2665	1.2665	0.228563	1
805	OG0004658	4254.97	4665.13	4824.24	6691.08	2534.27	1886.09	721.73	816.538	2580.3	2294.32	1112.66	1634.36	2168.75	1650.98	6755.55	8456.03	1236.19	1717.85	-0.345375	0.345375	-1.21769	1.21769	1.1014	-1.1014	-0.462933	0.462933	0.440656	-0.440656	-1.42647	1.42647	1.01815	-1.01815	-0.83966	0.83966	-1.2247	1.2247	0.228629	1
1121	OG0005419	404.018	404.954	492.882	492.365	677.877	663.797	383.617	322.332	1302.78	1347.28	630.616	457.528	737.382	433.073	372.143	326.28	370.698	573.973	-0.00866777	0.00866777	0.00393165	-0.00393165	0.078622	-0.078622	0.650376	-0.650376	-0.125781	0.125781	1.1917	-1.1917	1.9478	-1.9478	0.49196	-0.49196	-1.61208	1.61208	0.229232	1
116	OG0003004	215.152	172.635	250.125	221.934	106.141	159.558	3399.65	2451.33	100.211	82.2994	124.191	90.8452	140.26	97.2624	92.0933	60.3847	68.4041	109.328	0.645813	-0.645813	0.351765	-0.351765	-1.1842	1.1842	0.954689	-0.954689	0.578079	-0.578079	0.913418	-0.913418	1.0663	-1.0663	1.22492	-1.22492	-1.35628	1.35628	0.231658	1
657	OG0004313	938.959	780.147	113.824	31.4304	258.239	294.807	489.895	376.188	734.341	699.844	988.466	449.571	626.427	750.774	339.303	343.279	435.928	747.851	0.356576	-0.356576	2.18945	-2.18945	-0.255219	0.255219	0.506755	-0.506755	0.0928427	-0.0928427	1.44646	-1.44646	-0.348503	0.348503	-0.0224871	0.0224871	-1.01706	1.01706	0.231994	1
838	OG0004744	74.2961	101.732	473.529	351.012	180.915	173.634	116.059	117.845	155.573	151.141	122.351	128.782	102.279	145.539	114.504	97.4249	353.197	202.373	-1.14181	1.14181	1.08853	-1.08853	0.15045	-0.15045	-0.0559192	0.0559192	0.105864	-0.105864	-0.18759	0.18759	-1.27882	1.27882	0.590386	-0.590386	1.98879	-1.98879	0.232304	1
1042	OG0005229	294.069	367.331	345.404	281.401	198.568	122.397	423.325	377.064	339.941	362.357	342.676	359.185	457.404	704.616	398.544	375.981	648.324	437.312	-0.788329	0.788329	0.726715	-0.726715	1.68898	-1.68898	0.411341	-0.411341	-0.227156	0.227156	-0.167403	0.167403	-1.51409	1.51409	0.207329	-0.207329	1.3833	-1.3833	0.23308	1
685	OG0004387	502.686	565.726	443.808	321.626	271.98	350.632	274.968	268.51	286.603	253.112	503.665	317.033	413.72	373.072	239.436	235.45	378.653	461.731	-0.511427	0.511427	1.38359	-1.38359	-1.09496	1.09496	0.102991	-0.102991	0.537868	-0.537868	1.9711	-1.9711	0.447794	-0.447794	0.0727595	-0.0727595	-0.856871	0.856871	0.233351	1
818	OG0004686	356.127	363.396	753.996	550.699	420.19	462.418	482.926	491.881	400.853	418.904	309.558	227.593	335.323	388.695	308.233	302.177	393.767	355.898	-0.121659	0.121659	1.8765	-1.8765	-0.576193	0.576193	-0.110623	0.110623	-0.265181	0.265181	1.83764	-1.83764	-0.887749	0.887749	0.119473	-0.119473	0.608344	-0.608344	0.233384	1
934	OG0004987	1163.7	1090.61	1460.67	963.425	172.939	177.809	1247.1	1153.21	935.327	697.472	1721.19	1017.14	1062.67	706.75	1052.97	981.908	714.358	1559.68	0.169219	-0.169219	1.07059	-1.07059	-0.0724805	0.0724805	0.204155	-0.204155	0.7603	-0.7603	1.34191	-1.34191	1.04985	-1.04985	0.182265	-0.182265	-1.94012	1.94012	0.234072	1
4	OG0002762	203.331	241.46	1573.87	977.357	496.402	425.817	205.058	191.159	195.378	261.108	832.247	747.549	304.392	264.813	324.878	282.385	651.506	803.684	-0.742226	0.742226	2.02445	-2.02445	0.662697	-0.662697	0.303726	-0.303726	-1.24674	1.24674	0.464204	-0.464204	0.60206	-0.60206	0.605881	-0.605881	-0.905463	0.905463	0.234925	1
1065	OG0005284	344.724	218.86	355.77	167.082	621.022	769.916	599.066	364.948	229.903	99.4697	2585.94	666.857	1396.09	696.104	406.32	441.468	458.202	3021.64	0.547987	-0.547987	0.885511	-0.885511	-0.262664	0.262664	0.595911	-0.595911	0.971692	-0.971692	1.44766	-1.44766	0.820952	-0.820952	-0.101728	0.101728	-1.80756	1.80756	0.234985	1
1201	OG0005625	194.045	228.051	305.382	268.472	318.936	289.878	902.545	987.603	1011.68	1098.6	272.301	295.028	316.606	391.893	787.34	805.296	260.921	262.853	-1.36372	1.36372	1.08878	-1.08878	0.807929	-0.807929	-0.761742	0.761742	-0.697233	0.697233	-0.678115	0.678115	-1.79876	1.79876	-0.190847	0.190847	-0.0624441	0.0624441	0.235438	1
816	OG0004684	3293.04	3813.35	1673.08	3150.08	330.455	273.458	732.845	939.735	1244.11	1403.83	1248.81	1685.87	1244.98	2117.76	1691.9	1805.61	1465.29	734.476	-0.372743	0.372743	-1.55901	1.55901	0.480483	-0.480483	-0.62973	0.62973	-0.307068	0.307068	-0.758191	0.758191	-1.32134	1.32134	-0.165515	0.165515	1.69135	-1.69135	0.236082	1
1091	OG0005345	1942.35	2237.26	1578.61	1887.14	1902.21	1923.2	2093.97	2306.58	1180.39	1443.5	1275.95	1325.28	1030.62	904.704	2111.26	1996.75	1048.46	997.328	-1.16246	1.16246	-1.46662	1.46662	-0.0903942	0.0903942	-0.795961	0.795961	-1.65196	1.65196	-0.312458	0.312458	1.07188	-1.07188	0.459242	-0.459242	0.411729	-0.411729	0.236275	1
598	OG0004185	82.6995	54.3483	360.14	321.017	369.924	338.913	382.006	343.609	340.222	322.685	378.093	342.331	360.014	284.691	321.104	299.637	268.08	379.741	1.92145	-1.92145	0.533471	-0.533471	0.40636	-0.40636	0.491499	-0.491499	0.245722	-0.245722	0.461074	-0.461074	1.08516	-1.08516	0.321201	-0.321201	-1.60094	1.60094	0.23725	1
261	OG0003309	1558.89	984.11	595.842	535.072	518.167	548.088	1474.71	1372.04	540.366	664.908	425.47	358.248	216.226	373.786	450.039	391.996	352.402	484.998	1.57419	-1.57419	0.374245	-0.374245	-0.195444	0.195444	0.251195	-0.251195	-0.719662	0.719662	0.59738	-0.59738	-1.85988	1.85988	0.480089	-0.480089	-1.10281	1.10281	0.2373	1
133	OG0003045	354.24	351.071	344.031	352.013	1129.8	1120.48	1436.93	1418.39	1129.02	1119.92	1490.3	1454.07	1491.28	1365.62	1030.46	1060.61	473.324	1150.28	0.0311979	-0.0311979	-0.0796083	0.0796083	0.0287439	-0.0287439	0.0450993	-0.0450993	0.0280932	-0.0280932	0.0854203	-0.0854203	0.305355	-0.305355	-0.100111	0.100111	-2.89456	2.89456	0.237719	1
618	OG0004239	241.94	198.446	490.573	406.387	515.007	593.56	578.689	554.187	506.122	438.141	568.52	525.431	565.111	477.079	610.922	579.236	563.207	681.556	1.31882	-1.31882	1.25329	-1.25329	-0.946206	0.946206	0.288799	-0.288799	0.961354	-0.961354	0.525961	-0.525961	1.12792	-1.12792	0.355506	-0.355506	-1.26959	1.26959	0.23889	1
1156	OG0005509	449.369	535.951	1230.83	2948.26	0	295.852	1750.24	1545.63	1252.53	1829.53	557.012	617.686	534.726	758.586	1805.24	1502.01	1520.18	422.193	-0.204066	0.204066	-0.954367	0.954367	-2.32231	2.32231	0.144176	-0.144176	-0.434763	0.434763	-0.119949	0.119949	-0.401969	0.401969	0.212927	-0.212927	1.31276	-1.31276	0.240008	1
607	OG0004207	919.52	1157.94	1872.75	2754.25	307.995	339.71	2252.66	2447.19	2244.01	2887.86	1478.8	2327.44	2674.72	2690.69	2516.25	2570.92	1275.97	732.655	-0.762979	0.762979	-1.26654	1.26654	-0.325526	0.325526	-0.275172	0.275172	-0.834089	0.834089	-1.48228	1.48228	-0.0197899	0.0197899	-0.0714342	0.0714342	1.79825	-1.79825	0.240738	1
854	OG0004791	117.938	124.804	565.061	535.944	353.378	518.909	423.648	463.81	365.492	332.155	383.613	358.248	639.984	529.974	237.223	246.106	282.399	458.248	-0.250297	0.250297	0.234004	-0.234004	-1.67916	1.67916	-0.40044	0.40044	0.422823	-0.422823	0.302537	-0.302537	0.83202	-0.83202	-0.162612	0.162612	-2.10087	2.10087	0.241677	1
322	OG0003468	783.198	635.649	323.988	299.686	669.462	703.49	766.914	695.866	865.427	761.417	1294.35	1142.66	907.217	828.86	1525.28	1473.94	934.708	1161.91	1.56896	-1.56896	0.587883	-0.587883	-0.373933	0.373933	0.732803	-0.732803	0.964587	-0.964587	0.939111	-0.939111	0.680954	-0.680954	0.258298	-0.258298	-1.63498	1.63498	0.242582	1
293	OG0003405	295.526	322.881	223.027	256.673	179.291	207.489	250.321	257.805	153.83	169.927	155.009	118.479	177.157	157.253	113.175	117.978	110.573	169.232	-0.454133	0.454133	-0.720089	0.720089	-0.748464	0.748464	-0.151205	0.151205	-0.510463	0.510463	1.37128	-1.37128	0.611061	-0.611061	-0.213348	0.213348	-2.15227	2.15227	0.244901	1
820	OG0004691	306.826	331.039	61.0022	59.0756	653.928	746.546	791.48	757.463	2486.76	2356.75	1330.36	1535.6	989.42	1250.93	2669.61	2740.42	1308.58	1167.72	-0.645069	0.645069	0.272651	-0.272651	-1.12382	1.12382	0.373189	-0.373189	0.456155	-0.456155	-1.21692	1.21692	-1.98355	1.98355	-0.222414	0.222414	0.96665	-0.96665	0.24559	1
1152	OG0005493	961.459	1033.7	180.757	238.782	188.416	121.017	188.547	211.356	383.174	382.482	289.72	362.407	285.676	442.65	410.159	454.915	234.669	217.493	-0.28822	0.28822	-1.101	1.101	1.73393	-1.73393	-0.45403	0.45403	0.00719254	-0.00719254	-0.887292	0.887292	-1.71572	1.71572	-0.41185	0.41185	0.302396	-0.302396	0.246025	1
330	OG0003493	1315.44	1305.83	666.279	458.296	620.023	655.369	573.614	593.468	243.657	292.485	417.186	474.859	583.286	524.649	180.414	211.095	142.393	250.059	0.0294135	-0.0294135	1.48434	-1.48434	-0.22243	0.22243	-0.136535	0.136535	-0.730945	0.730945	-0.518899	0.518899	0.424766	-0.424766	-0.628964	0.628964	-2.20186	2.20186	0.247624	1
1167	OG0005529	154.055	137.211	744.13	669.025	428.213	428.039	350.837	329.604	422.052	479.583	223.544	240.71	453.88	380.882	266.738	282.387	256.943	208.764	0.946345	-0.946345	0.869687	-0.869687	0.00333786	-0.00333786	0.510624	-0.510624	-1.04413	1.04413	-0.605051	0.605051	1.43098	-1.43098	-0.466355	0.466355	1.69288	-1.69288	0.247969	1
430	OG0003754	309.249	391.715	222.084	295.966	206.536	394.344	363.222	329.506	277.343	275.022	526.667	494.987	295.714	359.587	661.343	669.047	318.196	240.754	-0.847105	0.847105	-1.02688	1.02688	-2.25052	2.25052	0.350448	-0.350448	0.0302519	-0.0302519	0.223279	-0.223279	-0.701834	0.701834	-0.0416972	0.0416972	0.997596	-0.997596	0.248059	1
735	OG0004496	301.157	360.548	509.554	346.484	186.363	258.458	136.919	129.963	274.255	328.309	104.413	117.075	112.046	90.5179	68.5707	72.5657	38.1835	101.768	-0.476865	0.476865	1.01209	-1.01209	-0.861118	0.861118	0.138476	-0.138476	-0.476613	0.476613	-0.303732	0.303732	0.564643	-0.564643	-0.150389	0.150389	-2.41386	2.41386	0.248833	1
798	OG0004642	1364.33	985	1280.35	975.111	996.095	1134.83	1161.16	1101.2	1091.96	735.07	2272.7	854.176	808.191	594.579	583.849	587.863	1138.35	2321.48	0.715035	-0.715035	0.599311	-0.599311	-0.288325	0.288325	0.117365	-0.117365	0.865057	-0.865057	2.00899	-2.00899	0.674358	-0.674358	-0.015169	0.015169	-1.51437	1.51437	0.248871	1
1092	OG0005347	172.05	186.829	403.972	355.539	65.6402	208.782	252.738	236.094	601.284	627.9	158.233	159.221	139.718	131.695	110.734	98.186	155.916	194.232	-0.220699	0.220699	0.341758	-0.341758	-2.7955	2.7955	0.182482	-0.182482	-0.116049	0.116049	-0.0166796	0.0166796	0.158426	-0.158426	0.321885	-0.321885	-0.586462	0.586462	0.250244	1
500	OG0003947	160.703	221.817	65.2492	55.3748	199.175	169.055	147.552	139.657	115.653	75.4875	169.728	170.934	141.346	115.011	86.3258	93.3679	125.679	182.02	-1.29459	1.29459	0.663321	-0.663321	0.662792	-0.662792	0.222741	-0.222741	1.70274	-1.70274	-0.0286753	0.0286753	0.832394	-0.832394	-0.317554	0.317554	-1.48368	1.48368	0.250574	1
298	OG0003413	989.073	1216.04	231.519	167.692	202.559	222.79	1074.26	1066.77	295.87	378.636	306.798	283.325	243.356	253.454	267.625	264.373	78.7535	201.792	-0.60275	0.60275	0.936276	-0.936276	-0.278537	0.278537	0.0204912	-0.0204912	-0.718576	0.718576	0.232934	-0.232934	-0.119025	0.119025	0.0357964	-0.0357964	-2.56827	2.56827	0.251065	1
242	OG0003271	377.608	380.937	412.275	578.553	1706.93	1698.59	300.015	271.339	544.302	552.116	502.28	490.772	363.535	294.631	607.372	601.307	455.028	220.982	-0.0318156	0.0318156	-1.21656	1.21656	0.0177466	-0.0177466	0.363848	-0.363848	-0.051667	0.051667	0.0840087	-0.0840087	0.758943	-0.758943	0.0363738	-0.0363738	2.50983	-2.50983	0.253159	1
388	OG0003653	158.648	109.406	858.58	831.771	663.039	255.031	449.178	416.651	645.355	643.3	817.827	893.05	277.811	334.384	815.749	769.268	543.892	542.581	1.08369	-1.08369	0.0935613	-0.0935613	2.62168	-2.62168	0.221612	-0.221612	0.00940882	-0.00940882	-0.259369	0.259369	-0.545142	0.545142	0.172993	-0.172993	0.00711597	-0.00711597	0.253479	1
981	OG0005091	676.738	480.563	930.555	1022.17	529.78	411.512	273.517	367.976	237.482	226.175	337.621	485.157	236.842	236.412	1541.84	1600.76	494.802	485.068	1.55043	-1.55043	-0.429123	0.429123	1.14921	-1.14921	-1.34681	1.34681	0.223042	-0.223042	-1.64011	1.64011	0.00832239	-0.00832239	-0.171476	0.171476	0.090866	-0.090866	0.253951	1
1198	OG0005622	1293.7	1424.91	396.355	620.632	586.22	473.817	801.76	1000.16	613.918	857.625	211.58	392.902	257.732	503.709	660.431	744.191	610.132	225.041	-0.19659	0.19659	-0.898333	0.898333	0.431943	-0.431943	-0.448519	0.448519	-0.674624	0.674624	-1.2219	1.2219	-1.31591	1.31591	-0.242909	0.242909	1.87825	-1.87825	0.254155	1
409	OG0003707	351.724	164.218	157.342	308.523	156.037	87.2059	107.764	132.185	292.568	287.734	243.327	319.375	325.016	283.974	554.386	606.077	209.222	304.142	1.7035	-1.7035	-1.52112	1.52112	1.3264	-1.3264	-0.477055	0.477055	0.0390505	-0.0390505	-0.633482	0.633482	0.315898	-0.315898	-0.208792	0.208792	-0.866684	0.866684	0.254444	1
927	OG0004968	733.388	683.717	580.046	485.66	893.338	900.135	811.937	784.728	481.139	392.55	701.704	641.04	779.71	509.392	394.115	407.724	487.643	696.676	0.32793	-0.32793	0.828598	-0.828598	-0.0354559	0.0354559	0.159425	-0.159425	0.948626	-0.948626	0.422679	-0.422679	1.96182	-1.96182	-0.158782	0.158782	-1.65127	1.65127	0.2554	1
522	OG0004002	883.06	764.9	846.217	841.549	534.256	472.509	1273.41	1299.67	582.195	511.26	735.488	741.789	533.101	426.322	669.065	661.692	971.293	1160.16	1.14195	-1.14195	0.0440502	-0.0440502	0.976808	-0.976808	-0.162572	0.162572	1.0332	-1.0332	-0.0679327	0.0679327	1.77255	-1.77255	0.0882469	-0.0882469	-1.41123	1.41123	0.259612	1
1178	OG0005564	345.385	199.033	264.922	769.762	981.868	909.681	808.473	1198.55	710.66	917.135	360.15	663.583	641.888	1058.53	1313.05	1498.2	1108.91	266.923	0.829654	-0.829654	-1.50583	1.50583	0.117779	-0.117779	-0.59983	0.59983	-0.391469	0.391469	-0.914758	0.914758	-0.756206	0.756206	-0.203255	0.203255	1.88873	-1.88873	0.260359	1
73	OG0002917	214.557	243.635	1054.01	930.579	501.798	517.587	360.1	355.959	478.051	504.454	412.126	456.591	495.776	496.038	717.216	690.364	458.21	330.904	-0.950378	0.950378	0.931396	-0.931396	-0.231961	0.231961	0.0865968	-0.0865968	-0.402429	0.402429	-0.766506	0.766506	-0.0039599	0.0039599	0.285675	-0.285675	2.41596	-2.41596	0.264086	1
1203	OG0005628	234.254	202.177	230.956	198.381	1126.75	1125.25	1047.68	1201.28	421.064	293.08	1021.27	891.083	549.108	480.281	370.592	313.343	733.441	1017.68	0.712692	-0.712692	0.7357	-0.7357	0.00646221	-0.00646221	-0.662256	0.662256	1.73778	-1.73778	0.66013	-0.66013	0.648341	-0.648341	0.81167	-0.81167	-1.57397	1.57397	0.266279	1
1052	OG0005254	1182.95	970.451	865.134	640.382	425.506	377.142	277.015	271.523	418.035	339.239	771.366	737.561	229.783	171.452	401.436	383.116	249.871	401.839	0.819859	-0.819859	1.24031	-1.24031	0.50062	-0.50062	0.0831945	-0.0831945	0.864497	-0.864497	0.186134	-0.186134	1.20786	-1.20786	0.194009	-0.194009	-1.93736	1.93736	0.266316	1
338	OG0003532	202.059	424.852	194.869	182.274	15.0016	176.638	127.255	120.976	193.974	175.552	216.189	136.275	167.168	210.321	184.408	170.244	171.022	240.754	-1.07056	1.07056	0.100603	-0.100603	-2.54079	2.54079	0.0762011	-0.0762011	0.150178	-0.150178	0.683008	-0.683008	-0.34437	0.34437	0.120311	-0.120311	-0.510137	0.510137	0.266836	1
1160	OG0005517	3855.32	3053.94	1909.93	2141.68	7369.77	6512.45	2391.57	2681.45	3111.68	3762.67	2902.4	3680.84	9255.52	4914.8	6234.53	5894.61	5682.32	2768.67	0.662871	-0.662871	-0.326897	0.326897	0.352948	-0.352948	-0.326569	0.326569	-0.541204	0.541204	-0.675788	0.675788	1.75067	-1.75067	0.160165	-0.160165	1.97039	-1.97039	0.268448	1
467	OG0003867	2250.45	2485.94	537.227	522.964	921.586	1006.28	342.945	302.843	202.935	209.739	717.306	760.507	388.226	352.839	557.886	531.54	281.595	664.104	-0.345494	0.345494	0.0934899	-0.0934899	-0.305287	0.305287	0.431511	-0.431511	-0.114579	0.114579	-0.203141	0.203141	0.331822	-0.331822	0.168046	-0.168046	-2.81065	2.81065	0.268738	1
212	OG0003211	421.842	343.861	270.4	168.457	104.236	147.202	113.483	124.61	156.637	136.179	172.028	166.714	175.258	128.149	115.394	103.77	175.008	183.183	0.828996	-0.828996	1.89085	-1.89085	-1.39094	1.39094	-0.380409	0.380409	0.568715	-0.568715	0.127688	-0.127688	1.26388	-1.26388	0.431715	-0.431715	-0.185781	0.185781	0.268746	1
779	OG0004597	208.716	178.825	180.568	147.839	271.807	194.929	330.139	285.173	302.741	273.231	170.648	171.402	350.51	329.773	125.38	134.724	120.119	165.155	0.804528	-0.804528	1.03955	-1.03955	1.71808	-1.71808	0.762258	-0.762258	0.534425	-0.534425	-0.0229902	0.0229902	0.317961	-0.317961	-0.374705	0.374705	-1.64669	1.64669	0.269556	1
635	OG0004272	288.326	290.908	300.544	413.17	860.095	815.349	755.156	757.161	576.191	705.001	329.332	550.255	766.414	1154.37	532.588	605.877	534.577	267.511	-0.0257602	0.0257602	-0.911736	0.911736	0.154303	-0.154303	-0.00766274	0.00766274	-0.58088	0.58088	-1.45115	1.45115	-1.16696	1.16696	-0.371938	0.371938	1.92375	-1.92375	0.271538	1
594	OG0004163	504.959	534.882	303.697	200.864	680.3	614.092	480.911	459.669	607.173	492.612	981.115	735.692	800.052	787.609	279.391	206.272	563.207	1081.65	-0.188139	0.188139	1.33248	-1.33248	0.334419	-0.334419	0.147658	-0.147658	0.681042	-0.681042	0.93463	-0.93463	0.0512394	-0.0512394	0.984329	-0.984329	-2.06072	2.06072	0.27201	1
766	OG0004573	40.8696	76.6669	201.986	183.217	351.184	299.4	95.2811	95.4287	479.545	519.638	145.35	222.446	162.504	190.982	614.242	688.594	229.093	208.183	-2.22647	2.22647	0.356195	-0.356195	0.581878	-0.581878	-0.00565598	0.00565598	-0.293334	0.293334	-1.53238	1.53238	-0.588948	0.588948	-0.417194	0.417194	0.349576	-0.349576	0.273983	1
376	OG0003625	424.13	440.967	213.974	178.924	410.374	430.056	225.05	246.31	212.215	196.864	251.142	261.31	364.352	336.514	251.87	294.053	407.299	271.576	-0.23118	0.23118	1.05971	-1.05971	-0.278187	0.278187	-0.53578	0.53578	0.445746	-0.445746	-0.235699	0.235699	0.471814	-0.471814	-0.917868	0.917868	2.37483	-2.37483	0.275775	1
46	OG0002844	210.843	237.93	975.775	895.354	267.994	129.883	307.587	333.54	395.519	371.531	271.33	288.968	235.488	261.618	389.899	344.802	314.226	351.821	-0.47147	0.47147	0.33573	-0.33573	2.71146	-2.71146	-0.316207	0.316207	0.244283	-0.244283	-0.245896	0.245896	-0.410591	0.410591	0.479468	-0.479468	-0.440909	0.440909	0.27647	1
282	OG0003367	139.905	121.28	838.224	996.614	538.779	362.881	186.132	178.132	349.483	256.368	227.679	228.544	257.032	295.341	230.34	224.39	207.615	208.77	0.736465	-0.736465	-0.891536	0.891536	2.01478	-2.01478	0.226844	-0.226844	1.5873	-1.5873	-0.0195657	0.0195657	-0.716259	0.716259	0.135129	-0.135129	-0.0286575	0.0286575	0.277184	1
108	OG0002990	146.534	162.852	120.255	114.624	260.101	233.557	155.203	143.494	172.076	159.862	142.13	144.704	99.2947	76.319	152.231	134.978	90.6858	123.285	-0.666955	0.666955	0.303153	-0.303153	0.679948	-0.679948	0.495709	-0.495709	0.465299	-0.465299	-0.113487	0.113487	1.65441	-1.65441	0.759661	-0.759661	-1.92657	1.92657	0.278052	1
361	OG0003591	371.68	552.148	540.024	930.488	732.47	721.747	396.103	376.56	313.838	434.881	370.729	445.352	540.969	767.099	502.574	500.214	443.088	249.483	-1.13477	1.13477	-1.54246	1.54246	0.0428331	-0.0428331	0.146928	-0.146928	-0.939121	0.939121	-0.531174	0.531174	-1.00422	1.00422	0.013674	-0.013674	1.62387	-1.62387	0.278927	1
694	OG0004410	170.379	136.881	662.964	719.205	637.69	711.252	487.515	427.858	369.7	295.449	373.498	410.229	388.492	308.116	314.453	273.253	396.154	437.318	1.34211	-1.34211	-0.500923	0.500923	-0.67134	0.67134	0.80231	-0.80231	1.37423	-1.37423	-0.576961	0.576961	1.42041	-1.42041	0.863	-0.863	-0.608009	0.608009	0.280728	1
1060	OG0005274	119.858	114.499	882.618	960.399	276.522	232.833	368.073	333.843	349.205	334.816	461.798	436.922	317.146	227.537	326.43	256.508	280.808	408.236	0.223596	-0.223596	-0.412663	0.412663	0.8387	-0.8387	0.476838	-0.476838	0.205684	-0.205684	0.270651	-0.270651	1.60865	-1.60865	1.17286	-1.17286	-1.80832	1.80832	0.282697	1
228	OG0003251	305.257	303.947	142.171	184.801	146.105	185.3	154.882	138.345	135.584	133.81	112.697	132.997	144.873	133.115	188.847	178.109	123.293	116.888	0.0297724	-0.0297724	-1.804	1.804	-1.63645	1.63645	0.780326	-0.780326	0.091067	-0.091067	-1.14323	1.14323	0.58524	-0.58524	0.404861	-0.404861	0.368978	-0.368978	0.283983	1
703	OG0004433	288.335	362.913	262.363	285.232	130.566	132.454	190.158	189.544	146.815	154.829	133.851	125.036	218.939	199.139	161.106	159.337	140.006	121.54	-2.15351	2.15351	-0.785366	0.785366	-0.134986	0.134986	0.030427	-0.030427	-0.499655	0.499655	0.640313	-0.640313	0.890609	-0.890609	0.103792	-0.103792	1.32771	-1.32771	0.288283	1
1172	OG0005546	89.8837	98.6489	535.488	415.186	663.142	689.729	342.543	397.263	310.461	223.508	490.325	435.049	342.208	302.429	233.154	203.671	440.709	600.136	-0.462361	0.462361	1.25848	-1.25848	-0.195445	0.195445	-0.735589	0.735589	1.61948	-1.61948	0.594057	-0.594057	0.613686	-0.613686	0.671208	-0.671208	-1.52329	1.52329	0.288537	1
122	OG0003020	88.7737	45.1421	300.138	266.947	182.591	241.14	253.786	225.593	256.573	239.5	206.061	142.363	324.197	253.805	249.875	213.886	182.955	243.081	2.08526	-2.08526	0.374588	-0.374588	-0.884336	0.884336	0.376407	-0.376407	0.220268	-0.220268	1.17007	-1.17007	0.779443	-0.779443	0.496662	-0.496662	-0.90325	0.90325	0.288541	1
1024	OG0005185	1002.46	1062.56	800.484	894.225	212.79	164.034	343.426	360.202	770.274	810.853	565.76	460.806	323.663	806.142	289.595	320.191	786.683	821.316	-0.181872	0.181872	-0.345648	0.345648	0.808523	-0.808523	-0.14898	0.14898	-0.160373	0.160373	0.638876	-0.638876	-2.66857	2.66857	-0.313544	0.313544	-0.134586	0.134586	0.289244	1
186	OG0003154	526.347	513.69	422.564	185.322	351.478	319.353	268.526	256.089	166.742	177.328	235.043	208.856	171.731	300.662	124.495	115.693	377.85	277.973	0.0697476	-0.0697476	2.23677	-2.23677	0.274461	-0.274461	0.135868	-0.135868	-0.176334	0.176334	0.338106	-0.338106	-1.56424	1.56424	0.210033	-0.210033	0.872832	-0.872832	0.28939	1
504	OG0003959	508.573	510.489	522.481	472.951	318.049	310.38	348.017	375.52	165.061	148.314	264.017	219.164	268.041	218.308	100.308	89.0522	260.921	352.99	-0.0240327	0.0240327	0.635982	-0.635982	0.155973	-0.155973	-0.485861	0.485861	0.683085	-0.683085	1.18651	-1.18651	1.30704	-1.30704	0.759788	-0.759788	-1.9169	1.9169	0.289922	1
1136	OG0005463	608.762	495.394	464.597	357.194	968.248	935.185	597.614	618.11	553.843	498.533	726.749	632.203	611.229	889.209	779.129	749.983	1115.29	849.038	1.00413	-1.00413	1.27816	-1.27816	0.169875	-0.169875	-0.164878	0.164878	0.514004	-0.514004	0.680409	-0.680409	-1.81187	1.81187	0.186411	-0.186411	1.3256	-1.3256	0.291234	1
130	OG0003036	147.117	180.418	221.341	229.64	380.879	414.502	379.914	347.174	721.989	691.845	343.596	355.907	348.345	323.38	287.819	317.903	279.217	319.261	-1.93037	1.93037	-0.349387	0.349387	-0.802589	0.802589	0.854937	-0.854937	0.404813	-0.404813	-0.334153	0.334153	0.70565	-0.70565	-0.942963	0.942963	-1.27039	1.27039	0.292471	1
723	OG0004472	267.515	292.813	289.023	654.263	764.662	623.366	690.332	579.131	546.823	731.816	478.822	708.062	619.371	1278.26	1344.4	1572.69	807.422	350.077	-0.184132	0.184132	-1.57914	1.57914	0.41516	-0.41516	0.357252	-0.357252	-0.590056	0.590056	-0.787713	0.787713	-1.41607	1.41607	-0.319162	0.319162	1.61142	-1.61142	0.292692	1
51	OG0002857	374.315	246.065	284.404	254.584	648.14	513.534	861.228	840.571	1046.95	864.179	1518.82	1159.54	676.072	725.918	853.332	798.443	1186.88	1730.6	1.71426	-1.71426	0.458787	-0.458787	0.960864	-0.960864	0.100653	-0.100653	0.793061	-0.793061	1.11233	-1.11233	-0.294828	0.294828	0.275558	-0.275558	-1.54543	1.54543	0.295349	1
663	OG0004331	4153.46	4276.2	1497.37	993.858	333.284	59.5728	920.402	928.386	734.714	862.474	391.271	681.721	635.646	895.592	532.81	476.227	1554.39	986.867	-0.0511801	0.0511801	0.71041	-0.71041	2.4489	-2.4489	-0.0151786	0.0151786	-0.281158	0.281158	-0.951451	0.951451	-0.596696	0.596696	0.1971	-0.1971	0.784957	-0.784957	0.296116	1
533	OG0004035	155.309	112.405	80.1075	100.084	392.049	372.116	212.548	205.598	335.725	311.402	371.198	299.716	218.937	240.682	259.193	261.075	337.288	608.283	1.26657	-1.26657	-0.876174	0.876174	0.206151	-0.206151	0.131375	-0.131375	0.297049	-0.297049	0.84206	-0.84206	-0.373918	0.373918	-0.0285943	0.0285943	-2.26504	2.26504	0.296612	1
1202	OG0005626	1025.62	1180.31	840.286	934.058	172.462	271.082	559.842	392.92	804.521	916.534	497.234	592.407	532.284	271.909	768.262	642.409	669.023	403.584	-0.390758	0.390758	-0.294495	0.294495	-1.23899	1.23899	0.97628	-0.97628	-0.362673	0.362673	-0.486712	0.486712	1.80419	-1.80419	0.497142	-0.497142	1.37901	-1.37901	0.296725	1
952	OG0005022	531.014	670.678	340.535	481.221	558.457	412.27	574.983	583.977	322.821	383.965	493.085	522.157	329.124	481.413	423.412	414.069	352.402	305.892	-1.00235	1.00235	-1.4765	1.4765	1.29879	-1.29879	-0.0669257	0.0669257	-0.746096	0.746096	-0.246964	0.246964	-1.62041	1.62041	0.09621	-0.09621	0.60933	-0.60933	0.297198	1
883	OG0004850	78.8798	63.1326	132.18	122.721	195.707	296.634	170.023	148.039	170.114	120.19	143.974	135.338	207.274	123.892	118.752	88.1819	104.209	144.22	0.719018	-0.719018	0.240626	-0.240626	-1.32925	1.32925	0.448191	-0.448191	1.11512	-1.11512	0.200492	-0.200492	1.63262	-1.63262	0.957903	-0.957903	-1.04433	1.04433	0.297227	1
382	OG0003641	677.773	634.614	521.515	555.744	782.912	742.424	985.1	959.729	417.979	449.979	802.179	749.741	368.695	925.768	1288.07	1335.98	1393.09	1154.8	0.214523	-0.214523	-0.207272	0.207272	0.173152	-0.173152	0.0851008	-0.0851008	-0.240503	0.240503	0.220416	-0.220416	-2.80731	2.80731	-0.119111	0.119111	0.610089	-0.610089	0.297342	1
762	OG0004560	1091.04	1427.01	1102.46	1402.03	1461.52	1453.17	868.139	1128.85	971.966	1051.92	522.408	727.061	822.713	1155.61	1017.91	994.061	1497.03	833.86	-0.899648	0.899648	-0.806539	0.806539	0.0193198	-0.0193198	-0.880282	0.880282	-0.266385	0.266385	-1.10442	1.10442	-1.13464	1.13464	0.0799187	-0.0799187	1.91843	-1.91843	0.298548	1
82	OG0002939	973.601	748.674	642.608	535.854	1132.23	1222.34	641.672	742.719	730.694	709.906	490.335	566.636	582.474	555.887	447.254	430.34	991.18	544.314	1.08529	-1.08529	0.752786	-0.752786	-0.318036	0.318036	-0.606554	0.606554	0.119916	-0.119916	-0.599897	0.599897	0.194092	-0.194092	0.160161	-0.160161	2.41843	-2.41843	0.298775	1
23	OG0002799	550.662	536.006	692.371	416.66	93.571	151.907	377.151	422.527	304.01	264.658	391.892	328.745	318.503	289.299	268.291	215.66	504.34	470.466	0.1017	-0.1017	1.87462	-1.87462	-1.79195	1.79195	-0.427879	0.427879	0.521816	-0.521816	0.66075	-0.66075	0.362308	-0.362308	0.82006	-0.82006	0.262035	-0.262035	0.29921	1
901	OG0004903	308.846	208.821	246.377	205.067	2418.35	2219.06	100.677	126.025	428.082	399.173	920.855	770.351	313.37	336.865	245.434	229.36	1159.04	1159.58	2.10456	-2.10456	0.99667	-0.99667	0.468076	-0.468076	-1.21783	1.21783	0.380628	-0.380628	0.969296	-0.969296	-0.393568	0.393568	0.368737	-0.368737	-0.00256279	0.00256279	0.302595	1
229	OG0003252	283.636	193.651	515.172	340.608	1081.79	1423.24	1101.81	1221.07	952.737	606.588	1347.25	1236.77	1171.8	926.797	886.763	807.074	921.972	1230.52	1.27497	-1.27497	1.37944	-1.37944	-0.921774	0.921774	-0.347215	0.347215	1.50119	-1.50119	0.289116	-0.289116	0.789509	-0.789509	0.31815	-0.31815	-0.969376	0.969376	0.302709	1
715	OG0004455	383.236	413.415	415.524	625.143	1019.53	961.632	493.451	453.089	366.325	462.41	226.773	345.6	584.376	496.248	735.632	761.405	245.814	193.65	-0.315866	0.315866	-1.67953	1.67953	0.243658	-0.243658	0.35556	-0.35556	-0.966736	0.966736	-1.73103	1.73103	0.680004	-0.680004	-0.14355	0.14355	0.989729	-0.989729	0.303176	1
119	OG0003015	637.518	443.543	485.578	455.101	2033.46	2033.31	845.666	788.263	973.507	861.775	1456.72	1367.43	990.508	797.268	1414.91	1338.36	952.996	1267.74	1.95325	-1.95325	0.352689	-0.352689	0.000411115	-0.000411115	0.382445	-0.382445	0.662729	-0.662729	0.344159	-0.344159	1.17665	-1.17665	0.302671	-0.302671	-1.54285	1.54285	0.304014	1
104	OG0002978	2009.96	1721.31	1057.51	526.757	895.335	1053.89	820.876	721.312	1006.21	994.842	1077.24	775.497	761.799	744.022	346.848	406.711	814.581	1000.82	0.542991	-0.542991	2.35144	-2.35144	-0.570933	0.570933	0.453145	-0.453145	0.0398811	-0.0398811	1.14313	-1.14313	0.0828622	-0.0828622	-0.557593	0.557593	-0.720053	0.720053	0.304017	1
41	OG0002837	713.679	730.855	163.15	294.725	822.176	728.187	716.978	628.51	585.912	649.449	432.825	647.198	632.526	493.049	1666.27	1726.65	475.695	468.698	-0.0899646	0.0899646	-2.17418	2.17418	0.458678	-0.458678	0.497475	-0.497475	-0.389133	0.389133	-1.50177	1.50177	0.937545	-0.937545	-0.134634	0.134634	0.0560562	-0.0560562	0.306339	1
530	OG0004028	1184.77	1392.13	922.327	786.807	490.474	412.47	262.807	320.92	480.013	417.717	252.058	298.774	473.413	468.208	1019.81	1010.49	378.653	899.613	-0.514054	0.514054	0.506518	-0.506518	0.551858	-0.551858	-0.635962	0.635962	0.443291	-0.443291	-0.541779	0.541779	0.0353083	-0.0353083	0.0293469	-0.0293469	-2.60347	2.60347	0.306538	1
1133	OG0005457	740.99	1070.8	270.043	590.055	171.804	156.33	993.638	1177.24	1385.03	1955.05	477.906	399.459	595.225	1024.81	676.608	859.086	816.968	367.534	-0.794269	0.794269	-1.62343	1.62343	0.205767	-0.205767	-0.369035	0.369035	-0.744654	0.744654	0.390136	-0.390136	-1.15701	1.15701	-0.518468	0.518468	1.65556	-1.65556	0.307444	1
494	OG0003931	95.6492	92.1987	217.223	110.14	225.029	233.411	264.74	249.223	135.586	113.085	200.555	194.807	224.363	155.478	116.06	104.534	127.286	236.091	0.108805	-0.108805	1.93759	-1.93759	-0.108306	0.108306	0.178836	-0.178836	0.535997	-0.535997	0.0861124	-0.0861124	1.07422	-1.07422	0.30949	-0.30949	-1.77362	1.77362	0.308387	1
944	OG0005004	74.4738	113.115	630.678	548.856	144.373	119.048	335.132	310.418	149.338	161.934	221.235	197.622	257.466	179.257	189.737	170.242	73.9805	113.399	-1.59357	1.59357	0.536648	-0.536648	0.743738	-0.743738	0.296178	-0.296178	-0.313055	0.313055	0.436134	-0.436134	1.38541	-1.38541	0.418961	-0.418961	-1.62744	1.62744	0.308597	1
878	OG0004840	92.0633	116.662	323.426	228.16	99.8442	137.446	263.369	282.142	256.289	201.012	217.105	173.27	337	329.287	163.99	130.411	354.796	425.1	-0.998111	0.998111	1.46275	-1.46275	-1.34206	1.34206	-0.29145	0.29145	1.02374	-1.02374	0.950987	-0.950987	0.0980409	-0.0980409	0.966008	-0.966008	-0.763459	0.763459	0.308832	1
679	OG0004373	989.787	943.114	380.994	471.642	1774.8	1805.03	1351	1261.77	850.552	836.022	1044.59	965.641	1075.14	1350.66	1313.05	1278.23	1003.11	990.99	0.421785	-0.421785	-1.85708	1.85708	-0.147491	0.147491	0.596569	-0.596569	0.150484	-0.150484	0.68603	-0.68603	-1.98394	1.98394	0.234727	-0.234727	0.10619	-0.10619	0.309245	1
737	OG0004498	207.048	152.776	405.157	165.036	675.007	104.593	362.221	394.433	543.738	576.688	1206.04	1005.91	255.29	276.165	311.342	214.898	215.57	705.405	0.426242	-0.426242	1.1901	-1.1901	2.06772	-2.06772	-0.12031	0.12031	-0.0831086	0.0831086	0.255683	-0.255683	-0.111	0.111	0.517919	-0.517919	-1.50306	1.50306	0.309261	1
1077	OG0005313	265.632	302.652	324.223	354.189	204.323	199.265	92.38	78.9677	153.552	188.578	236.883	214.481	324.742	283.981	111.4	94.3828	72.3895	396.018	-0.264881	0.264881	-0.179606	0.179606	0.0509669	-0.0509669	0.318281	-0.318281	-0.41628	0.41628	0.201816	-0.201816	0.272275	-0.272275	0.336243	-0.336243	-2.80935	2.80935	0.309956	1
66	OG0002904	295.264	425.932	420.33	498.633	286.314	352.581	901.015	449.369	429.769	424.819	189.502	238.359	175.529	393.65	564.543	317.908	43.7519	159.927	-0.619913	0.619913	-0.291538	0.291538	-0.35488	0.35488	1.14434	-1.14434	0.0198191	-0.0198191	-0.390696	0.390696	-1.31118	1.31118	0.956267	-0.956267	-1.95156	1.95156	0.310962	1
367	OG0003606	65.2098	79.5267	288.773	201.256	165.984	194.171	349.711	299.108	130.719	125.586	161.909	150.787	169.289	129.565	136.697	121.023	117.724	170.971	-0.86584	0.86584	1.56328	-1.56328	-0.685052	0.685052	0.682689	-0.682689	0.175277	-0.175277	0.311313	-0.311313	1.1635	-1.1635	0.532364	-0.532364	-1.61442	1.61442	0.311163	1
266	OG0003327	513.154	390.403	1268.73	913.597	166.983	250.054	554.243	481.449	264.991	272.95	483.426	238.364	267.773	159.738	230.122	226.569	278.421	423.356	0.709518	-0.709518	0.849899	-0.849899	-1.04033	1.04033	0.367078	-0.367078	-0.0772644	0.0772644	1.77321	-1.77321	1.31982	-1.31982	0.0406294	-0.0406294	-1.07862	1.07862	0.313048	1
311	OG0003441	208.854	187.943	368.507	298.335	841.35	1014.54	589.562	675.87	694.477	515.993	726.289	651.881	491.859	402.532	404.321	347.59	760.472	949.049	0.544207	-0.544207	1.08671	-1.08671	-0.963706	0.963706	-0.704345	0.704345	1.52271	-1.52271	0.557558	-0.557558	1.0314	-1.0314	0.779154	-0.779154	-1.13917	1.13917	0.315785	1
324	OG0003478	69.7717	44.2169	298.514	337.908	435.341	417.442	241.785	224.987	212.779	233.875	224.464	248.666	262.887	251.32	253.869	234.942	209.214	231.45	2.55923	-2.55923	-0.706624	0.706624	0.239593	-0.239593	0.410814	-0.410814	-0.539176	0.539176	-0.583948	0.583948	0.256776	-0.256776	0.442015	-0.442015	-0.57604	0.57604	0.31655	1
62	OG0002895	252.745	186.495	99.711	114.275	509.182	556.313	342.379	368.179	429.769	337.783	428.225	385.4	503.793	473.888	308.459	293.041	515.477	467.552	1.93285	-1.93285	-0.872212	0.872212	-0.566855	0.566855	-0.465301	0.465301	1.53579	-1.53579	0.674514	-0.674514	0.391978	-0.391978	0.32849	-0.32849	0.624761	-0.624761	0.316609	1
317	OG0003456	196.752	266.466	584.916	568.592	585.394	658.261	856.879	886.012	621.222	623.459	1031.25	847.152	789.2	808.623	1002.82	1000.91	790.717	1179.35	-1.59968	1.59968	0.150422	-0.150422	-0.622769	0.622769	-0.177667	0.177667	-0.0191009	0.0191009	1.04174	-1.04174	-0.129209	0.129209	0.0101108	-0.0101108	-2.09681	2.09681	0.316773	1
1002	OG0005141	692.226	732.257	742.894	733.48	344.08	287.739	438.386	464.212	352.194	436.956	377.633	527.772	437.057	461.105	545.907	614.242	389.798	316.941	-0.325264	0.325264	0.0738083	-0.0738083	1.03211	-1.03211	-0.331171	0.331171	-1.24319	1.24319	-1.91932	1.91932	-0.309912	0.309912	-0.681751	0.681751	1.19318	-1.19318	0.317874	1
363	OG0003595	543.001	583.283	146.79	118.107	300.597	299.264	649.646	554.994	177.968	166.671	196.406	192.471	464.726	316.639	176.642	157.561	143.188	227.961	-0.311988	0.311988	0.944545	-0.944545	0.019384	-0.019384	0.685391	-0.685391	0.285937	-0.285937	0.0882793	-0.0882793	1.65322	-1.65322	0.498025	-0.498025	-1.99239	1.99239	0.319012	1
559	OG0004092	587.047	683.083	974.961	1371.74	1134.94	993.086	163.821	237.34	213.06	305.81	135.69	167.183	139.175	243.511	339.303	362.308	735.828	299.536	-0.36335	0.36335	-0.812522	0.812522	0.320337	-0.320337	-0.880688	0.880688	-0.859007	0.859007	-0.499667	0.499667	-1.31018	1.31018	-0.15757	0.15757	2.025	-2.025	0.319839	1
986	OG0005103	901.145	846.324	603.272	493.018	262.444	291.113	248.47	220.544	267.24	282.423	218.025	179.822	178.513	245.641	195.948	180.139	94.6632	226.804	0.193646	-0.193646	0.620784	-0.620784	-0.319678	0.319678	0.367529	-0.367529	-0.170504	0.170504	0.59272	-0.59272	-0.976893	0.976893	0.259464	-0.259464	-2.53729	2.53729	0.325072	1
979	OG0005086	712.943	673.979	480.756	521.882	762.155	713.226	668.656	619.522	396.746	388.471	398.668	391.085	430.033	455.387	647.76	557.927	470.142	487.324	0.750116	-0.750116	-1.09519	1.09519	0.885486	-0.885486	1.0184	-1.0184	0.28139	-0.28139	0.256348	-0.256348	-0.764569	0.764569	1.98938	-1.98938	-0.479144	0.479144	0.325922	1
928	OG0004970	405.459	309.943	206.479	109.096	310.987	337.406	668.414	675.667	718.624	529.028	1020.21	864.474	1167.11	975.822	455.143	433.6	697.644	1218.32	0.816876	-0.816876	1.88804	-1.88804	-0.249291	0.249291	-0.0330151	0.0330151	0.929745	-0.929745	0.505562	-0.505562	0.546147	-0.546147	0.148303	-0.148303	-1.66267	1.66267	0.327237	1
821	OG0004692	213.465	198.011	171.017	148.232	110.094	148.077	120.408	114.917	108.635	125.817	79.5744	80.079	115.301	77.029	84.7702	74.5929	75.5715	64.5501	0.377962	-0.377962	0.7182	-0.7182	-1.48049	1.48049	0.23482	-0.23482	-0.737486	0.737486	-0.0318072	0.0318072	2.00248	-2.00248	0.642657	-0.642657	0.791523	-0.791523	0.327518	1
478	OG0003894	780.781	786.264	143.106	74.3555	212.114	231.943	171.795	194.086	130.534	114.864	128.791	114.733	147.586	106.133	85.2118	67.4888	108.187	185.509	-0.0216225	0.0216225	1.95382	-1.95382	-0.275972	0.275972	-0.376516	0.376516	0.39462	-0.39462	0.356751	-0.356751	1.00968	-1.00968	0.717276	-0.717276	-1.62703	1.62703	0.328777	1
701	OG0004429	116.653	211.915	307.504	517.614	374.732	345.013	330.433	368.213	492.084	717.6	298.054	527.304	172.816	236.412	906.065	920.486	318.991	126.198	-1.22365	1.22365	-1.07472	1.07472	0.174271	-0.174271	-0.228228	0.228228	-0.786812	0.786812	-1.17228	1.17228	-0.655883	0.655883	-0.0333224	0.0333224	1.82773	-1.82773	0.329974	1
999	OG0005131	201.049	174.811	98.3399	99.3015	267.331	222.275	134.182	132.083	206.045	190.949	171.568	164.368	160.884	198.784	235.894	232.664	200.471	177.362	1.17066	-1.17066	-0.081594	0.081594	1.54323	-1.54323	0.132182	-0.132182	0.637661	-0.637661	0.359413	-0.359413	-1.7671	1.7671	0.115617	-0.115617	1.0257	-1.0257	0.330414	1
880	OG0004842	1071.89	1112.55	158.028	288.845	936.228	1030.93	1013.13	1058.29	2119.37	1893.77	912.576	1144.05	1250.39	1503.48	1417.9	1490.06	1586.21	981.045	-0.131901	0.131901	-2.0743	2.0743	-0.341128	0.341128	-0.154485	0.154485	0.398326	-0.398326	-0.797525	0.797525	-0.651222	0.651222	-0.175832	0.175832	1.67031	-1.67031	0.33455	1
358	OG0003582	53.2954	98.1012	298.389	224.59	578.145	772.021	368.88	357.98	179.094	163.711	560.241	509.518	540.695	420.639	269.403	253.466	415.253	480.34	-2.19577	2.19577	1.04696	-1.04696	-1.06538	1.06538	0.11126	-0.11126	0.332942	-0.332942	0.351791	-0.351791	0.926573	-0.926573	0.22614	-0.22614	-0.5392	0.5392	0.33772	1
601	OG0004196	224.195	228.657	201.673	256.022	688.067	765.921	711.341	661.935	697.009	748.095	494.005	486.562	597.122	446.2	587.844	580.759	241.033	350.083	-0.105137	0.105137	-1.26701	1.26701	-0.571324	0.571324	0.383874	-0.383874	-0.377198	0.377198	0.0809922	-0.0809922	1.54346	-1.54346	0.0646893	-0.0646893	-1.9684	1.9684	0.338263	1
862	OG0004808	656.096	571.513	385.926	417.282	1107.53	964.884	1113.89	1164.22	1264.94	1130.24	406.607	480.942	510.038	719.174	1393.61	1447.96	1322.1	1196.79	0.868774	-0.868774	-0.492231	0.492231	0.867915	-0.867915	-0.278575	0.278575	0.709103	-0.709103	-1.05607	1.05607	-2.1453	2.1453	-0.241205	0.241205	0.627278	-0.627278	0.340062	1
547	OG0004059	164.498	141.822	209.977	109.357	191.086	210.935	171.15	199.136	151.581	125.524	168.808	168.587	171.728	143.409	102.745	94.3828	97.8452	130.263	0.553889	-0.553889	2.35761	-2.35761	-0.369423	0.369423	-0.565497	0.565497	0.703576	-0.703576	0.00489416	-0.00489416	0.672383	-0.672383	0.3174	-0.3174	-1.06336	1.06336	0.342187	1
997	OG0005125	597.206	626.883	533.716	584.787	645.302	878.932	847.616	943.248	635.25	668.161	310.014	332.482	1118.24	1154.27	719.437	660.426	920.381	711.79	-0.318368	0.318368	-0.599601	0.599601	-2.01279	2.01279	-0.701235	0.701235	-0.331583	0.331583	-0.459234	0.459234	-0.208202	0.208202	0.561593	-0.561593	1.67824	-1.67824	0.344687	1
343	OG0003545	263.736	281.245	312.19	188.805	348.169	264.048	402.949	491.276	302.887	244.829	466.867	547.441	519.534	345.033	245.214	248.643	389.79	582.114	-0.21613	0.21613	1.65682	-1.65682	0.924369	-0.924369	-0.664499	0.664499	0.713114	-0.713114	-0.534406	0.534406	1.35783	-1.35783	-0.0467023	0.0467023	-1.33125	1.33125	0.345712	1
213	OG0003216	22159.8	27806.1	1282.1	1386.27	2364.85	2455.61	806.783	764.43	1274.71	1445.87	931.43	1420.34	561.042	659.542	1313.94	1321.86	1837.9	1290.41	-1.0434	1.0434	-0.360477	0.360477	-0.173837	0.173837	0.248887	-0.248887	-0.580887	0.580887	-1.91953	1.91953	-0.745122	0.745122	-0.027765	0.027765	1.61592	-1.61592	0.345804	1
686	OG0004391	679.865	653.5	212.6	178.619	132.167	179.496	93.9917	85.0266	135.864	137.952	195.482	232.754	150.301	199.857	151.124	133.709	210.805	207.026	0.226144	-0.226144	0.993391	-0.993391	-1.73675	1.73675	0.572735	-0.572735	-0.0872039	0.0872039	-0.995397	0.995397	-1.61854	1.61854	0.699244	-0.699244	0.10344	-0.10344	0.347075	1
879	OG0004841	86.1887	35.3917	156.593	100.476	242.794	171.981	227.53	224.786	258.538	199.238	247.463	243.515	230.06	169.68	215.032	185.467	145.575	329.147	1.82388	-1.82388	0.952949	-0.952949	0.745275	-0.745275	0.02648	-0.02648	0.565482	-0.565482	0.0350972	-0.0350972	0.659376	-0.659376	0.322253	-0.322253	-1.68807	1.68807	0.347147	1
267	OG0003329	419.918	474.957	411.278	431.724	256.474	270.357	669.862	647.595	275.939	305.807	127.876	187.315	292.732	291.432	423.405	435.125	146.37	115.143	-0.744569	0.744569	-0.29362	0.29362	-0.319014	0.319014	0.204602	-0.204602	-0.621543	0.621543	-2.28295	2.28295	0.0269358	-0.0269358	-0.165261	0.165261	1.44553	-1.44553	0.34737	1
394	OG0003669	382.45	451.719	361.265	428.066	217.649	267.203	851.773	842.443	531.805	539.212	923.15	639.232	597.124	822.471	653.749	527.988	540.137	796.002	-0.66941	0.66941	-0.682231	0.682231	-0.823897	0.823897	0.0443962	-0.0443962	-0.0557527	0.0557527	1.46492	-1.46492	-1.27966	1.27966	0.857895	-0.857895	-1.54371	1.54371	0.347529	1
101	OG0002970	668.615	591.845	413.899	445.039	80.035	158.756	457.938	436.458	475.53	428.066	595.078	500.138	618.161	591.249	631.336	622.622	403.313	472.786	0.48989	-0.48989	-0.291606	0.291606	-2.65161	2.65161	0.193168	-0.193168	0.422503	-0.422503	0.697252	-0.697252	0.178981	-0.178981	0.0558953	-0.0558953	-0.637822	0.637822	0.350148	1
196	OG0003178	624.263	559.35	1014.99	737.069	395.19	285.085	507.571	476.33	654.624	717.603	707.89	787.205	482.908	420.994	1038.1	1014.86	432.738	565.831	0.555403	-0.555403	1.6064	-1.6064	1.63911	-1.63911	0.321555	-0.321555	-0.464789	0.464789	-0.537245	0.537245	0.693682	-0.693682	0.114633	-0.114633	-1.34978	1.34978	0.350448	1
513	OG0003979	45.1383	76.3648	448.737	335.6	279.733	389.785	301.886	294.059	288.855	300.487	269.076	303.457	311.717	280.78	266.296	260.314	112.164	164.58	-1.89239	1.89239	1.06213	-1.06213	-1.21035	1.21035	0.0967183	-0.0967183	-0.145342	0.145342	-0.442172	0.442172	0.384485	-0.384485	0.0836463	-0.0836463	-1.39462	1.39462	0.351264	1
351	OG0003569	240.213	230.533	302.136	246.053	229.575	240.935	341.174	314.976	262.746	292.192	218.025	214.481	261.796	324.448	171.313	152.481	174.212	275.646	0.209875	-0.209875	1.04419	-1.04419	-0.246437	0.246437	0.407511	-0.407511	-0.541589	0.541589	0.0836333	-0.0836333	-1.09078	1.09078	0.593615	-0.593615	-2.30137	2.30137	0.351598	1
681	OG0004377	96.8996	209.278	308.379	176.485	944.667	1158.2	527.533	597.047	429.483	458.271	615.897	766.6	408.844	426.325	314.89	252.702	784.353	488.482	-1.9464	1.9464	1.44254	-1.44254	-0.538496	0.538496	-0.327795	0.327795	-0.17197	0.17197	-0.578071	0.578071	-0.110997	0.110997	0.581021	-0.581021	1.23269	-1.23269	0.352317	1
887	OG0004860	1692.32	1812.26	833.481	1311.84	818.353	716.964	923.638	1103.29	1641.32	1822.13	665.118	1148.26	821.216	940.332	1609.55	1622.35	1443.81	777.509	-0.207445	0.207445	-1.35148	1.35148	0.400257	-0.400257	-0.5372	0.5372	-0.316421	0.316421	-1.61486	1.61486	-0.409848	0.409848	-0.0240011	0.0240011	1.81804	-1.81804	0.355451	1
231	OG0003255	1148.32	885.389	595.469	839.023	420.493	296.678	229.865	271.944	1141.09	1079.66	728.589	820.459	410.201	516.84	1205.2	1191.2	812.203	778.672	1.18975	-1.18975	-1.56243	1.56243	1.58874	-1.58874	-0.771665	0.771665	0.254544	-0.254544	-0.545774	0.545774	-1.05857	1.05857	0.0537487	-0.0537487	0.193959	-0.193959	0.359621	1
269	OG0003333	252.012	249.243	537.15	444.785	496.509	450.709	292.365	260.836	297.835	319.724	413.051	319.848	204.287	209.434	333.309	339.474	163.879	208.77	0.0745596	-0.0745596	1.26981	-1.26981	0.652722	-0.652722	0.769378	-0.769378	-0.478484	0.478484	1.71671	-1.71671	-0.167945	0.167945	-0.123694	0.123694	-1.62619	1.62619	0.362236	1
907	OG0004920	623.704	586.75	337.349	368.121	905.641	938.568	743.798	847.943	546.491	555.086	448.468	537.134	432.168	514.355	968.757	911.464	535.364	404.747	0.427447	-0.427447	-0.610711	0.610711	-0.249979	0.249979	-0.916076	0.916076	-0.109232	0.109232	-1.25955	1.25955	-1.21573	1.21573	0.426637	-0.426637	1.94531	-1.94531	0.3627	1
238	OG0003264	325.441	286.843	471.465	435.991	251.429	205.875	134.421	145.718	197.621	200.713	372.114	378.385	120.727	110.041	150.234	145.634	128.066	373.931	0.360831	-0.360831	0.223758	-0.223758	0.570167	-0.570167	-0.230813	0.230813	-0.0444309	0.0444309	-0.0478293	0.0478293	0.26504	-0.26504	0.0889992	-0.0889992	-2.80338	2.80338	0.36696	1
318	OG0003460	415.422	294.247	458.028	754.408	314.702	261.146	268.606	247.204	998.209	997.545	640.56	782.124	545.239	464.368	1181.68	1318.31	1310.97	222.145	0.630708	-0.630708	-0.902951	0.902951	0.343537	-0.343537	0.153262	-0.153262	0.00122874	-0.00122874	-0.36755	0.36755	0.29588	-0.29588	-0.201882	0.201882	2.62335	-2.62335	0.367399	1
1035	OG0005206	130.744	109.351	615.947	438.776	699.292	770.49	385.229	361.109	199.024	185.914	477.442	498.26	499.732	475.659	441.473	409.165	353.993	421.03	1.15374	-1.15374	2.1751	-2.1751	-0.627246	0.627246	0.418464	-0.418464	0.441019	-0.441019	-0.276283	0.276283	0.319568	-0.319568	0.491808	-0.491808	-1.12002	1.12002	0.369296	1
179	OG0003144	1058.55	1206.84	1953.86	3034.99	950.586	743.853	504.11	545.1	965.366	953.255	893.722	1079.43	1223.01	900.213	1237.16	1319.33	900.486	1158.99	-0.559255	0.559255	-1.8514	1.8514	1.04233	-1.04233	-0.333761	0.333761	0.0539294	-0.0539294	-0.80406	0.80406	1.29884	-1.29884	-0.274612	0.274612	-1.07233	1.07233	0.370941	1
1138	OG0005465	203.154	165.457	883.367	1451.85	1121.5	1224.68	641.994	749.586	1103.76	1446.46	429.15	617.217	929.463	833.475	650.866	741.869	1009.48	483.841	0.585711	-0.585711	-1.39425	1.39425	-0.25189	0.25189	-0.442816	0.442816	-0.769638	0.769638	-1.0294	1.0294	0.311842	-0.311842	-0.37423	0.37423	2.01598	-2.01598	0.371723	1
1181	OG0005575	203.3	198.43	245.568	237.911	433.614	429.686	217.945	191.865	444.647	407.355	310.478	289.881	209.167	187.074	273.841	254.225	187.736	247.151	0.201661	-0.201661	0.263455	-0.263455	0.0756759	-0.0756759	1.05863	-1.05863	0.728109	-0.728109	0.57071	-0.57071	0.92753	-0.92753	0.617959	-0.617959	-2.27276	2.27276	0.371879	1
450	OG0003810	628.126	606.561	904.972	695.624	1028.74	1198.32	1048.89	1028.4	701.22	576.688	846.34	616.285	844.005	871.453	492.2	490.687	717.532	918.821	0.188552	-0.188552	1.41199	-1.41199	-0.822029	0.822029	0.10649	-0.10649	1.05202	-1.05202	1.69802	-1.69802	-0.172739	0.172739	0.0166205	-0.0166205	-1.32797	1.32797	0.373757	1
787	OG0004613	357.025	340.941	418.832	245.443	753.716	690.147	388.61	402.11	215.867	170.525	426.845	326.872	410.743	334.38	237.667	218.704	84.3219	176.21	0.137464	-0.137464	1.55702	-1.55702	0.262627	-0.262627	-0.101843	0.101843	0.699983	-0.699983	0.791215	-0.791215	0.61133	-0.61133	0.247862	-0.247862	-2.10387	2.10387	0.37376	1
252	OG0003293	59.8684	91.9067	261.24	210.355	166.446	221.765	436.052	399.685	251.234	238.612	156.849	117.075	154.911	126.37	112.285	91.3407	105.8	148.291	-1.59442	1.59442	0.814999	-0.814999	-1.07632	1.07632	0.328676	-0.328676	0.194625	-0.194625	1.09675	-1.09675	0.766397	-0.766397	0.776904	-0.776904	-1.2631	1.2631	0.375992	1
127	OG0003030	195.243	213.039	861.451	1110.67	1199.5	1171.9	212.709	207.922	216.148	227.655	195.035	250.54	459.571	383.019	192.397	166.692	210.009	235.521	-0.562805	0.562805	-1.63175	1.63175	0.150265	-0.150265	0.146955	-0.146955	-0.334814	0.334814	-1.60845	1.60845	1.17313	-1.17313	0.924312	-0.924312	-0.739368	0.739368	0.376266	1
463	OG0003860	161.14	170.156	143.543	179.75	549.141	606.635	362.679	331.523	357.345	423.338	465.487	424.751	245.703	264.444	303.133	271.734	419.231	403.008	-0.445398	0.445398	-1.83292	1.83292	-0.814139	0.814139	0.734521	-0.734521	-1.38347	1.38347	0.748888	-0.748888	-0.601234	0.601234	0.893931	-0.893931	0.322909	-0.322909	0.376785	1
216	OG0003221	362.51	214.707	398.29	213.489	221.122	303.823	339.159	326.272	176.848	148.909	219.405	184.041	288.117	243.156	188.625	152.23	146.37	232.613	1.4437	-1.4437	1.7031	-1.7031	-0.888238	0.888238	0.109194	-0.109194	0.483567	-0.483567	0.494195	-0.494195	0.477147	-0.477147	0.602001	-0.602001	-1.28303	1.28303	0.376803	1
1205	OG0005631	139.74	113.921	160.277	97.6886	152.079	157.045	96.8911	97.3463	135.864	148.61	75.8947	101.157	140.534	186.002	81.4415	72.0531	62.0482	97.1159	0.733838	-0.733838	1.74922	-1.74922	-0.115807	0.115807	-0.016895	0.016895	-0.323015	0.323015	-1.0287	1.0287	-1.00388	1.00388	0.440972	-0.440972	-1.58846	1.58846	0.378074	1
902	OG0004909	550.497	557.5	228.831	318.665	503.665	421.486	305.977	283.579	233.313	210.666	194.392	248.053	272.255	309.284	786.013	712.187	812.203	284.375	-0.0341159	0.0341159	-0.885613	0.885613	0.479431	-0.479431	0.205056	-0.205056	0.275321	-0.275321	-0.654614	0.654614	-0.343675	0.343675	0.265964	-0.265964	2.59797	-2.59797	0.380435	1
909	OG0004926	154.504	164.986	132.679	130.296	288.237	279.602	278.351	286.689	155.517	226.471	90.6182	145.172	159.653	88.271	210.985	214.561	266.489	61.0609	-0.127147	0.127147	0.0351206	-0.0351206	0.0589316	-0.0589316	-0.0571902	0.0571902	-0.719866	0.719866	-0.896652	0.896652	1.11581	-1.11581	-0.0325706	0.0325706	2.43055	-2.43055	0.381445	1
234	OG0003259	645.266	546.741	586.165	310.656	174.115	181.888	527.624	528.337	589.777	557.445	626.471	523.558	673.834	634.314	341.298	332.372	440.693	654.224	0.623018	-0.623018	2.31559	-2.31559	-0.164573	0.164573	-0.00508812	0.00508812	0.212432	-0.212432	0.674524	-0.674524	0.227712	-0.227712	0.0998677	-0.0998677	-1.46998	1.46998	0.381647	1
904	OG0004913	44.1904	64.1688	477.711	533.94	512.519	438.241	471.973	445.027	576.017	568.396	292.999	301.584	524.959	480.636	317.777	266.149	269.663	311.126	-2.21002	2.21002	-0.666236	0.666236	0.93646	-0.93646	0.352222	-0.352222	0.0798247	-0.0798247	-0.173068	0.173068	0.528336	-0.528336	1.05981	-1.05981	-0.855737	0.855737	0.381862	1
572	OG0004114	634.11	598.238	387.304	413.221	439.723	481.91	392.155	376.862	193.971	214.337	207.445	191.066	346.172	265.867	232.565	242.554	116.141	183.764	0.305707	-0.305707	-0.340008	0.340008	-0.480731	0.480731	0.208868	-0.208868	-0.523826	0.523826	0.431671	-0.431671	1.37801	-1.37801	-0.220786	0.220786	-2.36808	2.36808	0.384101	1
977	OG0005079	67.0152	58.0052	816.81	651.263	649.592	841.067	582.635	545.201	393.835	409.422	892.047	627.988	734.669	632.916	900.737	843.356	693.667	841.326	0.734031	-0.734031	1.14852	-1.14852	-1.30829	1.30829	0.338053	-0.338053	-0.197634	0.197634	1.76936	-1.76936	0.757815	-0.757815	0.335092	-0.335092	-0.979767	0.979767	0.384185	1
587	OG0004152	534.419	482.019	374.313	360.415	457.605	456.24	475.194	449.771	378.963	342.812	257.582	371.361	325.011	269.42	519.495	517.327	239.442	366.36	0.496475	-0.496475	0.182167	-0.182167	0.0143806	-0.0143806	0.264694	-0.264694	0.482344	-0.482344	-1.74218	1.74218	0.900621	-0.900621	0.0201375	-0.0201375	-2.01759	2.01759	0.384604	1
975	OG0005077	104.199	99.4056	201.112	221.151	161.153	160.092	334.004	353.638	123.513	119.008	142.13	129.719	176.614	162.219	149.721	136.114	151.946	157.008	0.673028	-0.673028	-1.35658	1.35658	0.0943895	-0.0943895	-0.816218	0.816218	0.530956	-0.530956	1.30513	-1.30513	1.21451	-1.21451	1.36087	-1.36087	-0.468326	0.468326	0.386395	1
696	OG0004418	1988.13	1392.47	1191.55	1750.79	607.322	672.702	769.169	837.239	934.078	998.552	543.222	564.768	541.764	570.057	1735.79	1750.4	994.362	684.458	1.56454	-1.56454	-1.68768	1.68768	-0.453535	0.453535	-0.376257	0.376257	-0.296225	0.296225	-0.172671	0.172671	-0.225964	0.225964	-0.0372009	0.0372009	1.63911	-1.63911	0.388435	1
969	OG0005060	1547.79	595.194	369.631	214.317	683.763	750.979	822.408	696.269	356.927	361.919	989.749	615.208	689.135	526.31	408.759	337.19	303.081	693.774	1.80996	-1.80996	1.08298	-1.08298	-0.190755	0.190755	0.338193	-0.338193	-0.0282744	0.0282744	0.950201	-0.950201	0.545461	-0.545461	0.390655	-0.390655	-1.59582	1.59582	0.389591	1
746	OG0004521	1451.41	1132.43	515.359	599.197	1936.99	1990.05	954.324	935.178	1625.6	1383.99	2695.24	2089.44	2849.98	3104.58	1765.48	1639.79	1806.57	1829.5	1.66214	-1.66214	-1.01278	1.01278	-0.181903	0.181903	0.136427	-0.136427	1.08087	-1.08087	1.7047	-1.7047	-0.575701	0.575701	0.496969	-0.496969	-0.0849032	0.0849032	0.389769	1
123	OG0003024	274.484	182.288	272.603	261.463	275.313	220.734	249.678	228.219	148.785	153.414	466.872	455.654	323.95	314.537	173.757	177.599	155.924	183.177	2.35432	-2.35432	0.243306	-0.243306	1.28336	-1.28336	0.523761	-0.523761	-0.178664	0.178664	0.141828	-0.141828	0.171955	-0.171955	-0.12757	0.12757	-0.937424	0.937424	0.390668	1
102	OG0002971	1920.34	3023.44	1202.05	3133.16	430.813	230.524	3752.81	4202.64	3531.35	5646.98	982.026	1960.3	1417.52	3304.08	5429.51	6986.36	2497.05	571.646	-0.627177	0.627177	-1.25208	1.25208	0.851273	-0.851273	-0.158935	0.158935	-0.647903	0.647903	-0.93455	0.93455	-1.12309	1.12309	-0.352454	0.352454	1.76361	-1.76361	0.390974	1
109	OG0002993	1306.55	1389.17	1186.47	1347.32	1171.06	978.582	1911.41	1860.99	1462.23	1342.55	1422.22	1256.91	1580.57	1332.21	1323.74	1324.98	1051.64	1297.97	-0.464176	0.464176	-0.961483	0.961483	1.35612	-1.35612	0.202404	-0.202404	0.646287	-0.646287	0.934506	-0.934506	1.29138	-1.29138	-0.00711628	0.00711628	-1.58788	1.58788	0.391013	1
865	OG0004815	685.119	592.618	1154.66	930.565	355.058	377.303	723.499	701.421	259.38	245.116	394.657	369.956	365.437	408.57	198.165	206.526	225.919	399.519	0.666217	-0.666217	0.988961	-0.988961	-0.279512	0.279512	0.142588	-0.142588	0.260191	-0.260191	0.297291	-0.297291	-0.512824	0.512824	-0.190127	0.190127	-2.5543	2.5543	0.391136	1
131	OG0003039	83.9156	93.9903	270.981	280.966	1052.83	1002.48	567.737	548.127	889.015	948.518	563.46	575.539	396.631	350.006	734.463	726.679	235.465	333.218	-0.835174	0.835174	-0.266802	0.266802	0.361307	-0.361307	0.259174	-0.259174	-0.477568	0.477568	-0.156394	0.156394	0.920953	-0.920953	0.0785651	-0.0785651	-2.5351	2.5351	0.391817	1
743	OG0004516	1217.64	921.364	848.341	820.407	572.68	554.884	901.986	807.248	1735.08	1974.3	2193.13	1371.66	784.591	1326.89	2678.69	2751.56	2696.84	1350.28	0.79674	-0.79674	0.0962876	-0.0962876	0.090785	-0.090785	0.318827	-0.318827	-0.370967	0.370967	1.32553	-1.32553	-1.47735	1.47735	-0.077189	0.077189	1.91387	-1.91387	0.392714	1
414	OG0003722	392.59	491.479	252.685	239.652	316.271	322.309	604.061	556.506	360.433	325.645	179.392	178.422	411.555	278.653	395.666	345.817	136.029	198.303	-1.06452	1.06452	0.251924	-0.251924	-0.0899833	0.0899833	0.38996	-0.38996	0.48256	-0.48256	0.0258067	-0.0258067	1.83249	-1.83249	0.639811	-0.639811	-1.77264	1.77264	0.393063	1
415	OG0003724	561.953	513.314	779.096	694.275	187.777	236.118	571.119	532.274	321.134	322.69	655.454	664.979	553.174	452.59	408.541	436.396	473.316	397.768	0.674103	-0.674103	0.857929	-0.857929	-1.69951	1.69951	0.52464	-0.52464	-0.0360358	0.0360358	-0.107502	0.107502	1.49038	-1.49038	-0.491288	0.491288	1.29248	-1.29248	0.395216	1
822	OG0004697	400.994	357.792	42.8322	50.8908	2693.88	2426.08	458.02	500.038	905.836	871.512	946.618	944.08	832.065	869.682	1271.55	1412.44	1193.24	1089.21	1.14572	-1.14572	-1.73026	1.73026	1.05257	-1.05257	-0.882559	0.882559	0.388615	-0.388615	0.0270099	-0.0270099	-0.444826	0.444826	-1.05634	1.05634	0.917194	-0.917194	0.395797	1
55	OG0002873	372.74	291.333	130.869	60.3372	188.272	232.672	224.63	297.392	229.338	223.807	297.139	334.829	307.919	273.687	106.293	114.426	130.468	434.416	0.516028	-0.516028	1.55277	-1.55277	-0.444007	0.444007	-0.586728	0.586728	0.0513829	-0.0513829	-0.251044	0.251044	0.247758	-0.247758	-0.155109	0.155109	-2.26498	2.26498	0.395852	1
264	OG0003313	80.1458	66.9212	189.124	355.105	489.018	373.263	351.724	297.998	632.858	720.934	288.156	274.432	362.339	475.769	739.755	768.157	579.92	536.179	0.674672	-0.674672	-2.28826	2.28826	1.0072	-1.0072	0.620415	-0.620415	-0.488125	0.488125	0.183023	-0.183023	-1.01545	1.01545	-0.141315	0.141315	0.294044	-0.294044	0.39589	1
244	OG0003277	50.1804	64.9705	155.75	160.422	131.234	179.87	196.272	160.655	230.183	219.662	198.241	233.213	373.18	385.496	301.793	313.341	259.33	244.244	-1.53203	1.53203	-0.176265	0.176265	-1.86474	1.86474	1.19026	-1.19026	0.278965	-0.278965	-0.966799	0.966799	-0.193641	0.193641	-0.223917	0.223917	0.35733	-0.35733	0.395967	1
1067	OG0005287	134.476	165.982	90.597	47.3224	222.634	278.946	134.826	147.13	321.414	315.876	64.8554	135.807	201.574	382.302	327.319	295.581	178.19	154.688	-0.514954	0.514954	1.5409	-1.5409	-0.551346	0.551346	-0.214307	0.214307	0.0426815	-0.0426815	-1.73644	1.73644	-1.52009	1.52009	0.25023	-0.25023	0.346725	-0.346725	0.398064	1
528	OG0004022	227.774	205.821	557.444	332.422	150.796	183.808	166.157	147.838	122.674	134.702	149.945	127.382	126.97	81.2887	81.8853	79.1623	105.8	162.823	0.346098	-0.346098	1.72855	-1.72855	-0.674408	0.674408	0.398809	-0.398809	-0.319452	0.319452	0.556142	-0.556142	1.49939	-1.49939	0.11558	-0.11558	-1.45107	1.45107	0.399187	1
963	OG0005045	336.136	340.403	240.819	283.23	426.71	176.123	364.69	352.93	320.856	371.83	258.966	277.701	379.002	292.852	317.336	335.924	207.623	230.287	-0.0404937	0.0404937	-0.519577	0.519577	2.66878	-2.66878	0.105213	-0.105213	-0.472462	0.472462	-0.224124	0.224124	0.823243	-0.823243	-0.182686	0.182686	-0.33228	0.33228	0.399305	1
217	OG0003227	439.384	552.465	752.435	514.175	759.542	759.228	206.911	233.874	313.271	270.883	788.384	1100.03	443.299	527.84	1270.37	1292.02	1797.81	874.043	-0.722233	0.722233	1.19164	-1.19164	0.00130922	-0.00130922	-0.387505	0.387505	0.45967	-0.45967	-1.04543	1.04543	-0.551469	0.551469	-0.0535099	0.0535099	2.19021	-2.19021	0.400164	1
90	OG0002955	91.5987	91.3987	765.111	542.559	324.761	162.182	247.747	231.856	236.078	159.566	902.456	1132.81	316.875	279.367	128.487	104.534	158.302	367.529	0.00527694	-0.00527694	0.821749	-0.821749	1.6121	-1.6121	0.159981	-0.159981	0.933754	-0.933754	-0.546496	0.546496	0.303745	-0.303745	0.496327	-0.496327	-1.92122	1.92122	0.400951	1
965	OG0005049	259.742	201.516	374.375	612.17	162.889	160.53	1343.51	1266.61	353.693	439.328	228.149	365.746	216.769	125.305	436.768	509.667	369.903	325.071	0.781313	-0.781313	-1.49188	1.49188	0.0451566	-0.0451566	0.182344	-0.182344	-0.668363	0.668363	-1.434	1.434	1.65492	-1.65492	-0.476736	0.476736	0.39927	-0.39927	0.401658	1
646	OG0004287	448.527	218.723	496.629	615.943	2926.11	3134.66	1008.62	930.04	1127.57	1085.97	2280.03	1605.28	1209.71	1175.31	1181.01	1199.57	1318.66	2858.23	1.8345	-1.8345	-0.571233	0.571233	-0.183294	0.183294	0.215897	-0.215897	0.100105	-0.100105	0.92505	-0.92505	0.07682	-0.07682	-0.0415323	0.0415323	-1.96335	1.96335	0.402308	1
1031	OG0005201	138.474	133.473	640.548	619.833	314.684	329.93	175.339	177.627	218.677	213.739	202.39	220.569	344.004	272.619	150.012	150.708	140.802	230.874	0.195333	-0.195333	0.174591	-0.174591	-0.251252	0.251252	-0.0688473	0.0688473	0.121316	-0.121316	-0.456556	0.456556	1.22979	-1.22979	-0.0245799	0.0245799	-2.57436	2.57436	0.402482	1
519	OG0003992	140.388	122.167	360.702	435.424	920.886	897.262	537.048	688.189	405.628	423.637	144.885	381.19	330.727	205.746	443.603	473.69	252.051	194.656	0.367502	-0.367502	-0.497029	0.497029	0.068807	-0.068807	-0.653238	0.653238	-0.115007	0.115007	-2.37868	2.37868	1.2337	-1.2337	-0.173691	0.173691	0.68039	-0.68039	0.403671	1
187	OG0003156	295.092	264.155	98.0271	95.3426	175.818	200.106	224.469	234.075	181.062	153.346	247.918	225.252	306.02	293.559	192.843	200.439	179.773	280.88	0.627747	-0.627747	0.157537	-0.157537	-0.733132	0.733132	-0.237746	0.237746	0.940483	-0.940483	0.543592	-0.543592	0.235849	-0.235849	-0.219167	0.219167	-2.49067	2.49067	0.404437	1
422	OG0003742	648.032	716.716	1181.44	1078.81	164.612	175.977	634.826	674.961	167.865	162.526	799.414	640.009	425.399	427.745	545.237	593.701	628.429	1012.45	-0.533071	0.533071	0.480992	-0.480992	-0.353458	0.353458	-0.324569	0.324569	0.171161	-0.171161	1.173	-1.173	-0.0291298	0.0291298	-0.450717	0.450717	-2.47891	2.47891	0.405448	1
1005	OG0005145	325.376	263.4	415.835	268.471	1459.43	1533.04	761.355	728.985	657.984	606.295	821.498	654.213	582.477	640.729	461.798	401.381	611.079	889.873	0.906062	-0.906062	1.85365	-1.85365	-0.211738	0.211738	0.186961	-0.186961	0.351923	-0.351923	0.975759	-0.975759	-0.409916	0.409916	0.602487	-0.602487	-1.59883	1.59883	0.405768	1
138	OG0003055	318.263	303.536	618.694	640.901	586.258	590.454	451.03	483.197	456.717	416.234	407.996	411.634	410.469	300.662	633.56	609.68	365.13	403.584	0.392463	-0.392463	-0.292153	0.292153	-0.0590985	0.0590985	-0.570558	0.570558	0.768482	-0.768482	-0.0735593	0.0735593	2.55875	-2.55875	0.318286	-0.318286	-0.828933	0.828933	0.406693	1
933	OG0004986	138.945	144.22	212.117	316.458	183.627	81.6744	94.2623	100.437	369.697	324.461	356.02	443.479	93.3234	96.5525	141.136	152.484	992.771	558.265	-0.101837	0.101837	-1.07904	1.07904	2.10062	-2.10062	-0.173367	0.173367	0.356216	-0.356216	-0.597966	0.597966	-0.0929597	0.0929597	-0.211269	0.211269	1.53131	-1.53131	0.407551	1
484	OG0003907	705.905	624.092	809.317	979.375	764.027	1085.83	324.824	368.886	927.47	1032.14	464.563	784.868	725.99	934.841	797.552	851.477	1048.46	405.328	0.31301	-0.31301	-0.483785	0.483785	-0.885194	0.885194	-0.323205	0.323205	-0.271789	0.271789	-1.30449	1.30449	-0.63988	0.63988	-0.1664	0.1664	2.25105	-2.25105	0.40765	1
1007	OG0005150	792.577	780.935	340.66	350.75	1396.12	1433.28	90.8497	117.342	338.513	296.293	415.351	402.268	415.358	485.961	171.533	166.185	1868.6	767.623	0.0479799	-0.0479799	-0.094637	0.094637	-0.0851618	0.0851618	-0.825201	0.825201	0.431307	-0.431307	0.103764	-0.103764	-0.507984	0.507984	0.102702	-0.102702	2.70835	-2.70835	0.407888	1
96	OG0002963	1420.17	1613.08	815.997	1318.26	366.19	295.239	471.65	507.434	516.228	605.99	1049.19	1063.51	884.694	1132.71	1316.82	1357.13	1342.8	948.509	-0.527268	0.527268	-1.95104	1.95104	0.889326	-0.889326	-0.303003	0.303003	-0.663131	0.663131	-0.0561924	0.0561924	-1.01923	1.01923	-0.124982	0.124982	1.42666	-1.42666	0.408304	1
658	OG0004317	107.667	112.643	1105.96	841.765	223.614	136.571	187.984	194.794	152.432	168.154	224.464	200.432	248.777	228.606	187.067	169.232	193.312	306.468	-0.176782	0.176782	1.06154	-1.06154	1.89125	-1.89125	-0.139222	0.139222	-0.383808	0.383808	0.442646	-0.442646	0.330672	-0.330672	0.391743	-0.391743	-1.7719	1.7719	0.409753	1
705	OG0004438	93.0985	77.8532	108.952	95.5833	392.11	369.234	129.675	134.711	69.0606	71.935	91.9981	86.1669	115.033	124.95	72.119	58.8649	62.8437	157.601	0.565094	-0.565094	0.414162	-0.414162	0.190393	-0.190393	-0.120697	0.120697	-0.129181	0.129181	0.207393	-0.207393	-0.26187	0.26187	0.641193	-0.641193	-2.72377	2.72377	0.412243	1
781	OG0004599	517.928	472.982	191.807	190.415	1060.72	1236.69	462.065	445.128	1205.09	633.53	1562.97	1134.69	934.618	592.442	427.623	378.549	863.91	1818.45	0.237251	-0.237251	0.0190394	-0.0190394	-0.400646	0.400646	0.0976547	-0.0976547	1.62601	-1.62601	0.83042	-0.83042	1.17205	-1.17205	0.318409	-0.318409	-1.86137	1.86137	0.41469	1
640	OG0004280	1127.61	1064.93	1046.27	1261.91	3523.2	3520.41	1858.41	1847.66	1258.71	1202.81	1644.38	1597.83	1887.42	1751.43	1751.99	1595.38	1598.93	1462.55	0.662119	-0.662119	-2.1638	2.1638	0.00915154	-0.00915154	0.0671738	-0.0671738	0.525923	-0.525923	0.332497	-0.332497	0.865503	-0.865503	1.08362	-1.08362	1.03174	-1.03174	0.417014	1
14	OG0002783	270.004	268.94	253.228	314.706	172.925	163.509	491.463	450.883	268.36	268.509	233.668	234.622	246.066	180.322	213.923	206.27	87.5038	212.841	0.012478	-0.012478	-0.684431	0.684431	0.176947	-0.176947	0.272276	-0.272276	-0.0017564	0.0017564	-0.0128813	0.0128813	0.9749	-0.9749	0.11516	-0.11516	-2.63858	2.63858	0.417126	1
845	OG0004770	573.315	860.739	382.993	935.797	184.953	88.5134	356.004	450.276	1085.6	1134.34	217.013	437.447	506.319	810.473	838.386	908.31	716.641	354.933	-0.732295	0.732295	-1.53153	1.53153	1.28849	-1.28849	-0.427197	0.427197	-0.0802177	0.0802177	-1.23062	1.23062	-0.843928	0.843928	-0.146264	0.146264	1.23329	-1.23329	0.41788	1
401	OG0003691	887.076	964.123	486.062	483.744	434.584	378.902	1035.32	868.255	289.978	327.418	426.395	408.356	508.144	367.038	511.282	495.261	357.183	475.699	-0.476801	0.476801	0.0273863	-0.0273863	0.784156	-0.784156	1.0054	-1.0054	-0.694724	0.694724	0.247555	-0.247555	1.84706	-1.84706	0.182342	-0.182342	-1.63015	1.63015	0.418513	1
489	OG0003916	288.245	196.51	407.344	288.628	204.431	216.919	319.748	283.051	317.897	312.527	364.281	256.22	395.008	296.753	338.195	300.145	207.631	402.426	1.16165	-1.16165	1.04708	-1.04708	-0.181933	0.181933	0.373701	-0.373701	0.0522847	-0.0522847	1.06902	-1.06902	0.871885	-0.871885	0.365905	-0.365905	-1.96006	1.96006	0.420486	1
34	OG0002818	451.199	393.873	549.763	478.348	221.262	354.19	286.004	296.483	168.427	143.876	208.365	189.656	293.272	300.307	263.851	245.091	194.895	268.087	0.63179	-0.63179	0.646947	-0.646947	-2.15142	2.15142	-0.167561	0.167561	0.732165	-0.732165	0.43779	-0.43779	-0.110378	0.110378	0.343303	-0.343303	-1.47236	1.47236	0.420978	1
37	OG0002828	556.895	514.937	137.925	162.817	164.145	210.561	96.569	86.2383	120.989	141.804	262.177	234.617	372.496	518.97	446.706	430.043	358.758	268.674	0.393214	-0.393214	-0.831372	0.831372	-1.24429	1.24429	0.567644	-0.567644	-0.795589	0.795589	0.557231	-0.557231	-1.65043	1.65043	0.190902	-0.190902	1.44219	-1.44219	0.422029	1
974	OG0005072	84.3864	65.8844	138.487	159.029	464.191	494.606	416.721	393.525	294.747	303.738	186.287	200.427	468.801	337.224	436.349	510.187	313.423	200.041	1.1088	-1.1088	-0.621775	0.621775	-0.285675	0.285675	0.257824	-0.257824	-0.135292	0.135292	-0.329287	0.329287	1.47009	-1.47009	-0.702513	0.702513	1.98858	-1.98858	0.423262	1
1048	OG0005242	383.916	403.226	54.1952	51.1089	183.758	141.476	218.429	189.242	562.543	628.199	209.745	191.539	139.992	86.6097	166.212	137.768	143.188	262.271	-0.169002	0.169002	0.20191	-0.20191	0.895627	-0.895627	0.493225	-0.493225	-0.379859	0.379859	0.312564	-0.312564	1.62292	-1.62292	0.644612	-0.644612	-2.02333	2.02333	0.424522	1
167	OG0003118	193.182	147.298	525.506	319.221	768.699	755.271	346.489	400.997	277.337	219.064	970.987	814.385	458.679	488.083	684.597	645.71	637.983	907.237	1.06208	-1.06208	1.92461	-1.92461	0.0694442	-0.0694442	-0.574717	0.574717	0.925176	-0.925176	0.69129	-0.69129	-0.244773	0.244773	0.230378	-0.230378	-1.3733	1.3733	0.424774	1
1142	OG0005473	188.922	170.111	745.693	569.42	560.773	554.835	639.496	649.112	344.713	303.146	290.24	351.224	453.608	440.876	291.148	247.628	280.808	323.332	0.715104	-0.715104	1.82936	-1.82936	0.0726398	-0.0726398	-0.101848	0.101848	0.875686	-0.875686	-1.29754	1.29754	0.194279	-0.194279	1.10244	-1.10244	-0.96067	0.96067	0.425135	1
15	OG0002784	227.001	281.829	172.64	251.581	322.749	311.63	366.543	352.426	454.749	525.476	266.781	231.808	268.855	225.404	204.824	209.57	174.22	201.216	-1.18664	1.18664	-2.04928	2.04928	0.193034	-0.193034	0.216237	-0.216237	-0.79459	0.79459	0.772477	-0.772477	0.968138	-0.968138	-0.126127	0.126127	-0.791864	0.791864	0.426101	1
534	OG0004037	491.835	463.123	1969.41	1844.52	2426.54	2362.69	1759.34	2028.52	2092.26	1877.44	2527.03	2468.87	1552.36	2205.09	3318.03	3086.72	2831.63	2982.22	0.425593	-0.425593	0.463523	-0.463523	0.188716	-0.188716	-1.00593	1.00593	0.766036	-0.766036	0.164793	-0.164793	-2.45902	2.45902	0.511212	-0.511212	-0.366636	0.366636	0.428425	1
1216	OG0005647	119.721	74.2474	434.128	253.584	1123.21	1214.23	870.894	988.61	963.962	733.302	1158.66	1084.59	1559.14	1136.26	662.191	660.931	1283.95	2076.56	1.42765	-1.42765	1.5987	-1.5987	-0.237148	0.237148	-0.385507	0.385507	0.827588	-0.827588	0.201086	-0.201086	0.955398	-0.955398	0.00579851	-0.00579851	-1.4363	1.4363	0.4289	1
813	OG0004671	77.9568	44.1148	181.818	81.2764	211.301	218.907	222.14	280.992	221.481	258.142	435.599	488.426	277.61	542.501	222.797	198.156	436.716	632.702	1.29869	-1.29869	1.79019	-1.79019	-0.0828139	0.0828139	-0.547948	0.547948	-0.358066	0.358066	-0.267818	0.267818	-1.51307	1.51307	0.274217	-0.274217	-0.858502	0.858502	0.430972	1
514	OG0003981	132.34	133.128	376.001	306.694	968.537	955.027	529.237	528.942	1198.92	1107.2	878.051	678.04	693.161	747.572	1031.57	926.169	734.237	997.91	-0.0365839	0.0365839	1.25112	-1.25112	0.0865608	-0.0865608	0.00343278	-0.00343278	0.490198	-0.490198	1.58406	-1.58406	-0.465432	0.465432	0.663524	-0.663524	-1.87601	1.87601	0.433426	1
184	OG0003152	297.621	318.017	363.238	270.947	551.577	460.158	403.659	462.385	570.969	527.243	600.713	528.704	816.061	681.195	401.436	449.846	369.911	495.46	-0.35728	0.35728	1.56942	-1.56942	0.974465	-0.974465	-0.731281	0.731281	0.429393	-0.429393	0.687586	-0.687586	0.971405	-0.971405	-0.613278	0.613278	-1.56462	1.56462	0.433809	1
416	OG0003725	315.949	336.924	417.645	442.302	453.208	393.43	449.581	449.063	377.84	312.326	383.158	452.372	411.826	320.185	322.216	315.117	394.563	453.014	-0.450302	0.450302	-0.401888	0.401888	0.989649	-0.989649	0.00807859	-0.00807859	1.33052	-1.33052	-1.1611	1.1611	1.75473	-1.75473	0.156119	-0.156119	-0.966614	0.966614	0.435416	1
146	OG0003070	105.59	121.446	212.788	185.279	476.079	502.621	415.795	445.527	332.084	386.037	409.371	366.205	416.709	361.362	389.448	392.338	253.761	382.061	-0.791909	0.791909	0.783573	-0.783573	-0.3075	0.3075	-0.391399	0.391399	-0.851884	0.851884	0.631081	-0.631081	0.806567	-0.806567	-0.0419162	0.0419162	-2.28798	2.28798	0.437037	1
674	OG0004360	288.267	317.6	456.856	290.848	263.513	310.9	289.707	331.522	178.254	153.944	208.365	266.457	317.42	285.398	181.302	205.003	400.927	270.413	-0.395036	0.395036	1.81154	-1.81154	-0.673113	0.673113	-0.549197	0.549197	0.597091	-0.597091	-0.998235	0.998235	0.433427	-0.433427	-0.50061	0.50061	1.58622	-1.58622	0.437382	1
546	OG0004058	0	66.5699	232.892	181.059	461.199	347.866	389.821	372.72	235.233	179.105	576.344	487.035	460.928	423.127	285.605	253.717	199.668	416.959	-2.67182	2.67182	0.334554	-0.334554	0.374265	-0.374265	0.0599165	-0.0599165	0.361939	-0.361939	0.224395	-0.224395	0.114243	-0.114243	0.157971	-0.157971	-0.941512	0.941512	0.439962	1
747	OG0004522	1098.18	1081.9	513.487	629.409	1461.03	1402.69	1164.14	1229.15	899.682	874.176	625.556	752.083	1258.27	1082.31	1283.53	1215.55	1151.07	667.594	0.06984	-0.06984	-0.948481	0.948481	0.190488	-0.190488	-0.254001	0.254001	0.134461	-0.134461	-0.858849	0.858849	0.70304	-0.70304	0.254356	-0.254356	2.48597	-2.48597	0.441622	1
584	OG0004147	314.933	312.009	317.745	289.281	247.223	226.348	301.708	294.159	251.517	231.211	291.164	279.574	407.491	664.157	291.59	289.996	273.648	324.495	0.0509903	-0.0509903	0.512699	-0.512699	0.481947	-0.481947	0.138519	-0.138519	0.459934	-0.459934	0.222029	-0.222029	-2.61868	2.61868	0.0299536	-0.0299536	-0.929445	0.929445	0.442763	1
78	OG0002927	426.547	511.775	834.292	1311.45	912.507	1051.89	726.965	722.626	1056.41	1252.48	696.391	811.097	1174.18	1065.27	2996.05	2911.9	840.037	563.505	-0.773751	0.773751	-1.89434	1.89434	-0.604422	0.604422	0.0255029	-0.0255029	-0.723412	0.723412	-0.648197	0.648197	0.414262	-0.414262	0.121336	-0.121336	1.67839	-1.67839	0.445989	1
566	OG0004105	1172.46	1096.2	1002.5	832.035	1632.48	1630.64	1101.48	1356.79	717.501	536.722	687.932	632.067	874.932	969.067	513.949	625.667	1096.18	1667.25	0.312996	-0.312996	0.865208	-0.865208	0.00525496	-0.00525496	-0.96704	0.96704	1.3421	-1.3421	0.394076	-0.394076	-0.475338	0.475338	-0.912798	0.912798	-1.92421	1.92421	0.448486	1
1020	OG0005174	236.044	206.343	441.623	305.823	199.987	305.816	259.423	242.053	438.752	399.948	227.224	218.227	170.103	125.66	145.13	139.544	242.624	270.994	0.587351	-0.587351	1.58948	-1.58948	-1.83045	1.83045	0.303036	-0.303036	0.404761	-0.404761	0.176697	-0.176697	1.3146	-1.3146	0.171657	-0.171657	-0.483228	0.483228	0.448886	1
386	OG0003649	565.648	498.313	453.545	423.234	544.959	567.045	214.401	206.608	209.975	245.122	347.726	295.033	131.582	121.752	397.446	402.147	416.033	414.057	1.29923	-1.29923	0.709725	-0.709725	-0.407745	0.407745	0.379971	-0.379971	-1.58547	1.58547	1.68299	-1.68299	0.796566	-0.796566	-0.120698	0.120698	0.0488707	-0.0488707	0.449088	1
142	OG0003059	131.127	156.821	232.644	117.236	134.986	329.094	130.718	194.995	344.152	278.572	259.886	305.799	190.179	153.703	155.56	132.443	249.784	478.601	-0.381623	0.381623	1.4107	-1.4107	-1.78883	1.78883	-0.843995	0.843995	0.4504	-0.4504	-0.347117	0.347117	0.453647	-0.453647	0.343285	-0.343285	-1.34353	1.34353	0.449197	1
825	OG0004700	1046.76	757.424	194.867	169.66	432.451	264.471	299.29	301.025	496.017	454.722	329.484	388.018	204.013	115.015	400.994	425.994	205.236	344.267	0.954598	-0.954598	0.41161	-0.41161	1.43473	-1.43473	-0.0172091	0.0172091	0.258543	-0.258543	-0.485603	0.485603	1.66054	-1.66054	-0.179941	0.179941	-1.50604	1.50604	0.452314	1
1045	OG0005234	119.578	131.563	221.465	250.535	254.883	172.511	155.928	157.531	120.709	113.088	117.292	121.758	197.504	178.551	160.22	156.797	84.3219	97.6975	-0.606022	0.606022	-0.782114	0.782114	2.44744	-2.44744	-0.0649606	0.0649606	0.413943	-0.413943	-0.237236	0.237236	0.640018	-0.640018	0.137112	-0.137112	-0.933167	0.933167	0.455466	1
496	OG0003940	635.887	582.729	403.91	345.396	401.188	412.761	410.679	369.693	535.033	505.342	488.026	493.123	544.493	545.944	364.376	346.327	491.613	585.603	0.897861	-0.897861	1.60735	-1.60735	-0.292669	0.292669	1.08105	-1.08105	0.587417	-0.587417	-0.106933	0.106933	-0.0273898	0.0273898	0.522757	-0.522757	-1.79595	1.79595	0.455772	1
829	OG0004712	217.896	198.633	430.32	464.286	2509.72	2067.18	1385.73	1323.79	905.577	1047.08	1212.02	1259.72	1372.49	1256.61	1270	1306.14	1337.23	1168.8	0.840537	-0.840537	-0.690056	0.690056	1.75732	-1.75732	0.415458	-0.415458	-1.31709	1.31709	-0.35076	0.35076	0.801115	-0.801115	-0.25491	0.25491	1.22149	-1.22149	0.456716	1
134	OG0003046	286.558	246.283	237.576	166.996	191.399	239.263	156.17	129.255	128.566	148.017	147.185	145.168	168.747	137.374	184.633	153.245	112.952	143.633	0.711914	-0.711914	1.64313	-1.64313	-1.0468	1.0468	0.888183	-0.888183	-0.662398	0.662398	0.0649878	-0.0649878	0.965252	-0.965252	0.874948	-0.874948	-1.12623	1.12623	0.457185	1
957	OG0005033	348.784	426.177	396.854	513.175	587.975	507.049	373.389	346.267	221.756	255.782	402.012	230.876	247.42	369.171	210.152	176.085	252.17	561.179	-0.529384	0.529384	-0.677568	0.677568	0.391751	-0.391751	0.199778	-0.199778	-0.377702	0.377702	1.43338	-1.43338	-1.0467	1.0467	0.467557	-0.467557	-2.01391	2.01391	0.457238	1
1084	OG0005323	232.081	293.565	1302.76	1004.02	1218.61	856.189	944.346	1009.31	1434.72	1338.99	1428.66	2000.57	1967.98	3733.24	704.567	806.06	1999.06	1998.15	-0.779368	0.779368	0.862909	-0.862909	1.16387	-1.16387	-0.221562	0.221562	0.229957	-0.229957	-1.11122	1.11122	-2.06306	2.06306	-0.447659	0.447659	0.00150942	-0.00150942	0.458836	1
563	OG0004101	3773.85	3084.74	1835.29	2281.64	1893.39	2013.81	914.143	1469.28	882.483	1122.27	465.414	967.804	807.86	551.24	947.405	1146.92	1539.27	672.252	0.456002	-0.456002	-0.492059	0.492059	-0.139882	0.139882	-1.0571	1.0571	-0.54285	0.54285	-1.5909	1.5909	0.856946	-0.856946	-0.432364	0.432364	1.77931	-1.77931	0.460524	1
840	OG0004753	99.0947	135.841	247.44	230.38	140.84	160.432	248.47	217.513	234.394	219.662	147.654	165.778	233.861	217.594	128.265	120.769	110.581	172.715	-1.52782	1.52782	0.348749	-0.348749	-0.63525	0.63525	0.648911	-0.648911	0.316916	-0.316916	-0.564811	0.564811	0.351946	-0.351946	0.293999	-0.293999	-2.14238	2.14238	0.465149	1
1056	OG0005266	162.209	170.895	661.777	492.191	305.433	348.187	919.056	841.78	828.943	659.875	797.575	684.179	877.103	785.905	737.197	701.526	704.748	1104.83	-0.240725	0.240725	1.35668	-1.35668	-0.603861	0.603861	0.405139	-0.405139	1.04834	-1.04834	0.706481	-0.706481	0.506256	-0.506256	0.228888	-0.228888	-2.04105	2.04105	0.468008	1
428	OG0003751	205.704	195.604	241.572	186.629	364.785	435.845	395.458	357.574	274.538	198.643	406.611	373.238	469.615	327.994	309.347	275.791	241.033	443.709	0.17417	-0.17417	0.887966	-0.887966	-0.614208	0.614208	0.348148	-0.348148	1.10997	-1.10997	0.296148	-0.296148	1.22874	-1.22874	0.396864	-0.396864	-2.04833	2.04833	0.469192	1
333	OG0003505	419.965	373.764	258.054	290.022	1418.98	1349.46	290.591	282.748	443.524	459.319	527.123	468.294	421.321	504.05	562.825	568.712	871.849	574.548	0.683324	-0.683324	-0.684733	0.684733	0.294817	-0.294817	0.160606	-0.160606	-0.205388	0.205388	0.693813	-0.693813	-1.04953	1.04953	-0.0610758	0.0610758	2.41303	-2.41303	0.469726	1
220	OG0003233	1104.05	1132.6	619.381	668.067	578.705	563.346	263.049	251.645	471.988	468.017	437.425	500.611	291.37	261.611	445.82	413.81	476.49	592.587	-0.245939	0.245939	-0.728627	0.728627	0.259131	-0.259131	0.426888	-0.426888	0.0813943	-0.0813943	-1.29789	1.29789	1.03691	-1.03691	0.717475	-0.717475	-2.0924	2.0924	0.470699	1
653	OG0004303	56.1173	79.3249	211.537	148.363	253.87	207.849	184.117	171.669	148.493	155.421	132.471	123.631	195.334	173.581	129.818	146.392	75.5715	105.839	-1.52042	1.52042	1.55756	-1.55756	0.884435	-0.884435	0.310447	-0.310447	-0.202276	0.202276	0.306282	-0.306282	0.523196	-0.523196	-0.532444	0.532444	-1.48047	1.48047	0.470992	1
434	OG0003762	835.355	778.729	593.282	661.057	496.262	346.393	585.699	578.905	353.696	314.993	539.087	571.324	521.433	418.157	463.573	452.621	374.676	492.552	0.38465	-0.38465	-0.592425	0.592425	1.95	-1.95	0.0639686	-0.0639686	0.634588	-0.634588	-0.31831	0.31831	1.20513	-1.20513	0.131061	-0.131061	-1.49028	1.49028	0.47215	1
719	OG0004462	673.757	591.396	243.524	222.034	225.365	241.436	195.233	233.167	326.189	250.747	495.385	550.719	248.513	235.616	208.599	183.691	312.627	547.222	0.560974	-0.560974	0.397765	-0.397765	-0.296675	0.296675	-0.763027	0.763027	1.12681	-1.12681	-0.455804	0.455804	0.229555	-0.229555	0.54713	-0.54713	-2.35103	2.35103	0.472888	1
691	OG0004404	1114.11	1020.74	822.616	606.568	814.969	873.59	592.541	588.825	451.378	506.529	336.954	320.639	469.615	488.8	724.985	704.068	560.86	548.385	0.728369	-0.728369	2.51734	-2.51734	-0.57812	0.57812	0.0523841	-0.0523841	-0.958757	0.958757	0.413142	-0.413142	-0.333349	0.333349	0.243744	-0.243744	0.187276	-0.187276	0.473133	1
687	OG0004398	318.778	315.63	896.103	711.775	492.985	496.579	364.951	380.093	281.273	256.368	239.179	301.116	287.035	252.382	178.637	196.123	209.214	302.397	0.0553295	-0.0553295	1.27835	-1.27835	-0.0405007	0.0405007	-0.226627	0.226627	0.516528	-0.516528	-1.27831	1.27831	0.716358	-0.716358	-0.520321	0.520321	-2.03101	2.03101	0.475515	1
13	OG0002779	572.177	596.36	158.967	151.801	5483.4	4924.33	182.587	167.326	104.708	106.279	169.733	161.104	144.061	148.73	88.5427	68.2474	130.46	173.303	-0.289671	0.289671	0.322738	-0.322738	0.751876	-0.751876	0.610488	-0.610488	-0.104195	0.104195	0.365064	-0.365064	-0.223182	0.223182	1.81183	-1.81183	-1.97414	1.97414	0.480511	1
1	OG0002756	93.5382	64.2892	319.93	301.647	921.432	1018.4	722.743	705.874	811.256	669.346	521.603	671.076	796.251	754.671	682.376	682.75	677.757	526.874	1.92052	-1.92052	0.304823	-0.304823	-0.518032	0.518032	0.122365	-0.122365	0.993265	-0.993265	-1.29876	1.29876	0.277832	-0.277832	-0.00284477	0.00284477	1.298	-1.298	0.481746	1
168	OG0003121	316.059	288.79	258.928	334.382	934.865	886.184	503.124	480.316	485.139	553.366	684.896	756.77	719.208	522.871	1157.86	1099.75	1036.51	758.9	0.477358	-0.477358	-1.34656	1.34656	0.283048	-0.283048	0.245556	-0.245556	-0.695613	0.695613	-0.527873	0.527873	1.6737	-1.6737	0.272543	-0.272543	1.6372	-1.6372	0.481978	1
1207	OG0005635	866.078	795.381	397.166	429.022	1197.16	1090.64	528.753	504.201	864.869	784.212	440.184	627.056	645.958	624.4	973.528	1015.51	965.716	540.244	0.358666	-0.358666	-0.325011	0.325011	0.392456	-0.392456	0.200341	-0.200341	0.412263	-0.412263	-1.47591	1.47591	0.143041	-0.143041	-0.177901	0.177901	2.38142	-2.38142	0.482128	1
744	OG0004518	107.018	88.3258	228.209	305.65	328.598	307.858	662.854	673.648	475.806	415.934	541.842	490.308	645.687	605.938	521.27	492.463	610.928	564.087	1.36565	-1.36565	-2.07025	2.07025	0.465073	-0.465073	-0.115261	0.115261	0.958203	-0.958203	0.712566	-0.712566	0.453241	-0.453241	0.405567	-0.405567	0.568939	-0.568939	0.482926	1
334	OG0003519	561.563	551.393	311.312	211.73	170.801	201.364	281.732	308.498	376.99	327.128	470.823	350.779	268.581	224.339	239.662	216.162	350.819	555.945	0.072942	-0.072942	1.51985	-1.51985	-0.655582	0.655582	-0.362013	0.362013	0.565298	-0.565298	1.16637	-1.16637	0.716504	-0.716504	0.41156	-0.41156	-1.80586	1.80586	0.483831	1
1006	OG0005147	190.871	180.831	312.811	476.169	1089.61	847.386	269.622	331.825	1426.88	1483.19	495.84	611.593	510.581	636.465	1149.5	1251.45	960.951	575.141	0.198011	-0.198011	-1.51786	1.51786	0.916751	-0.916751	-0.758169	0.758169	-0.141863	0.141863	-0.766248	0.766248	-0.804542	0.804542	-0.311296	0.311296	1.84125	-1.84125	0.487003	1
164	OG0003111	1397.05	1406.58	969.378	1173.67	1249.22	1157.92	690.078	609.727	845.522	751.657	726.289	580.217	621.357	817.441	1331.74	1313.7	937.087	1421.84	-0.0328384	0.0328384	-0.920507	0.920507	0.366245	-0.366245	0.596915	-0.596915	0.567484	-0.567484	1.07959	-1.07959	-1.31597	1.31597	0.0658306	-0.0658306	-1.98431	1.98431	0.487209	1
720	OG0004463	517.058	485.5	352.569	313.312	1435.65	1430.17	564.998	537.525	603.246	566.918	582.779	681.842	612.86	724.144	827.064	854.015	640.369	654.806	0.657177	-0.657177	1.23087	-1.23087	0.0399565	-0.0399565	0.520234	-0.520234	0.648151	-0.648151	-1.63547	1.63547	-1.73776	1.73776	-0.334708	0.334708	-0.232716	0.232716	0.488277	1
29	OG0002812	244.79	254.537	2169.46	2751.85	332.691	197.038	1288.26	1653.78	1657.88	2722.98	264.946	532.933	429.734	1246.67	2850.45	3839.25	973.679	187.835	-0.0573619	0.0573619	-0.347744	0.347744	0.752491	-0.752491	-0.365081	0.365081	-0.714428	0.714428	-0.986969	0.986969	-1.43197	1.43197	-0.434335	0.434335	1.9881	-1.9881	0.488527	1
501	OG0003948	375.425	262.246	346.779	182.275	237.538	263.061	101.886	79.7745	272.849	139.435	319.673	324.531	202.634	218.89	172.869	123.814	172.621	472.786	0.735119	-0.735119	1.28785	-1.28785	-0.211174	0.211174	0.504126	-0.504126	1.34027	-1.34027	-0.0312331	0.0312331	-0.159726	0.159726	0.684828	-0.684828	-1.92626	1.92626	0.489059	1
427	OG0003748	58.7927	73.9435	588.911	588.401	537.621	582.006	1409.71	1515.13	584.16	569.29	413.506	459.864	745.524	699.654	533.475	534.072	509.909	473.949	-2.28411	2.28411	0.0086664	-0.0086664	-0.793291	0.793291	-0.72123	0.72123	0.257987	-0.257987	-1.06218	1.06218	0.63515	-0.63515	-0.0111883	0.0111883	0.7314	-0.7314	0.48969	1
567	OG0004106	1487.11	1447.79	252.621	491.016	355.408	150.696	340.816	404.027	165.061	186.805	183.982	368.078	148.125	240.316	679.937	780.69	428.769	224.466	0.0527854	-0.0527854	-1.26293	1.26293	1.59348	-1.59348	-0.334326	0.334326	-0.243445	0.243445	-1.31371	1.31371	-0.934989	0.934989	-0.271747	0.271747	1.23211	-1.23211	0.489799	1
449	OG0003808	1408.03	1678.37	1696.92	911.236	887.923	1168.77	438.144	483.803	714.129	790.728	1077.23	1368.35	1492.13	1226.78	1544.68	1425.47	1433.13	1116.55	-0.63286	0.63286	2.17648	-2.17648	-0.986589	0.986589	-0.357815	0.357815	-0.367763	0.367763	-0.860074	0.860074	0.705129	-0.705129	0.289989	-0.289989	0.897083	-0.897083	0.490611	1
209	OG0003208	70.3392	113.355	74.5493	155.098	296.466	257.282	273.286	300.48	579.388	670.539	230.444	434.047	260.014	308.925	808.85	890.611	378.653	132.589	-0.941631	0.941631	-1.41041	1.41041	0.284543	-0.284543	-0.190584	0.190584	-0.293241	0.293241	-1.2321	1.2321	-0.345698	0.345698	-0.193458	0.193458	1.9354	-1.9354	0.492219	1
899	OG0004901	182.1	177.388	135.115	89.2884	57.8453	188.357	232.2	222.767	174.324	156.902	542.716	469.235	163.576	136.15	387.025	330.982	172.621	355.316	0.0560102	-0.0560102	0.872581	-0.872581	-2.26503	2.26503	0.0885918	-0.0885918	0.224756	-0.224756	0.310264	-0.310264	0.390983	-0.390983	0.333511	-0.333511	-1.47864	1.47864	0.493417	1
542	OG0004052	431.24	425.802	156.218	262.681	329.709	337.318	376.692	350.204	236.075	240.086	126.956	129.246	147.317	179.261	208.819	188.258	191.713	147.134	0.0597625	-0.0597625	-2.39397	2.39397	-0.107463	0.107463	0.343246	-0.343246	-0.0793438	0.0793438	-0.0841952	0.0841952	-0.921371	0.921371	0.487744	-0.487744	1.23926	-1.23926	0.495396	1
1004	OG0005143	773.301	693.381	562.875	321.234	160.247	206.011	288.327	349.127	395.519	340.444	361.994	351.692	413.456	376.271	235.448	212.615	521.841	594.326	0.464009	-0.464009	2.32741	-2.32741	-1.064	1.064	-0.812194	0.812194	0.637248	-0.637248	0.122925	-0.122925	0.400966	-0.400966	0.433944	-0.433944	-0.553003	0.553003	0.496508	1
373	OG0003622	296.576	217.547	108.643	119.759	1506.06	1441.99	699.904	869.048	926.628	740.099	1046.37	928.617	863.541	947.066	957.988	845.896	1532.11	1387.54	1.79102	-1.79102	-0.567065	0.567065	0.253235	-0.253235	-1.25611	1.25611	1.30394	-1.30394	0.694663	-0.694663	-0.537493	0.537493	0.724009	-0.724009	0.576933	-0.576933	0.49702	1
44	OG0002841	946.586	850.133	889.733	806.376	246.92	277.206	605.348	634.367	494.894	456.199	715.613	684.633	343.188	280.428	280.274	253.463	120.914	284.951	0.36161	-0.36161	0.331051	-0.331051	-0.38924	0.38924	-0.157674	0.157674	0.274055	-0.274055	0.149031	-0.149031	0.677907	-0.677907	0.338367	-0.338367	-2.72248	2.72248	0.497065	1
562	OG0004098	3703.98	2539.27	471.467	605.337	461.614	396.877	295.747	317.183	764.938	748.388	902.452	995.134	881.172	1122.43	1487.69	1545.14	1088.23	827.509	1.78301	-1.78301	-1.1882	1.1882	0.720722	-0.720722	-0.334266	0.334266	0.104521	-0.104521	-0.46681	0.46681	-1.15082	1.15082	-0.181039	0.181039	1.30072	-1.30072	0.497079	1
704	OG0004436	210.643	205.654	368.381	264.098	217.953	239.842	1094.11	1346.69	970.416	856.446	1281.47	1447.51	1584.42	1651.38	666.405	734.511	1575.86	1024.08	0.112917	-0.112917	1.55349	-1.55349	-0.450503	0.450503	-0.974998	0.974998	0.587792	-0.587792	-0.573262	0.573262	-0.194986	0.194986	-0.458055	0.458055	1.9996	-1.9996	0.50301	1
524	OG0004014	83.8532	151.784	335.04	322.889	474.324	364.203	343.347	393.828	488.996	350.216	446.629	505.294	486.978	513.645	393.891	376.265	558.442	627.474	-2.23711	2.23711	0.143308	-0.143308	1.0191	-1.0191	-0.531399	0.531399	1.28327	-1.28327	-0.478238	0.478238	-0.206808	0.206808	0.177594	-0.177594	-0.451711	0.451711	0.50323	1
476	OG0003889	250.06	205.597	466.658	310.482	417.693	418.633	262.565	224.886	286.533	250.631	255.282	225.256	102.279	66.0249	239.667	220.48	155.12	363.452	0.543698	-0.543698	1.11974	-1.11974	-0.00626662	0.00626662	0.430688	-0.430688	0.372402	-0.372402	0.348151	-0.348151	1.20023	-1.20023	0.232326	-0.232326	-2.23845	2.23845	0.504563	1
1047	OG0005237	477.978	392.265	463.412	340.869	145.358	139.075	194.024	235.489	440.158	482.544	318.753	402.737	292.187	214.758	161.995	148.173	159.098	316.36	0.653468	-0.653468	1.01088	-1.01088	0.146565	-0.146565	-0.640514	0.640514	-0.304774	0.304774	-0.772298	0.772298	1.01335	-1.01335	0.295661	-0.295661	-2.19448	2.19448	0.505007	1
195	OG0003176	1051.9	853.252	696.679	504.425	895.704	728.532	635.256	586.537	656.019	622.574	2743.71	1698.06	1115.03	808.261	1069.64	1107.53	935.512	2331.37	0.543301	-0.543301	0.834008	-0.834008	0.536279	-0.536279	0.20777	-0.20777	0.136295	-0.136295	1.2266	-1.2266	0.83108	-0.83108	-0.0906932	0.0906932	-2.22631	2.22631	0.505698	1
771	OG0004581	505.86	530.249	453.36	589.18	1114.91	1373.06	163.983	238.62	356.503	424.816	227.679	381.195	221.104	232.862	640.88	705.836	611.723	197.14	-0.108564	0.108564	-0.600866	0.600866	-0.478565	0.478565	-0.855035	0.855035	-0.403254	0.403254	-1.16287	1.16287	-0.119454	0.119454	-0.222458	0.222458	2.36398	-2.36398	0.506117	1
583	OG0004145	1569.36	747.927	1039.44	1019.72	1468.19	1355.88	954.575	901.464	744.166	693.328	1385.88	302.521	789.745	597.773	611.81	535.343	448.656	1463.14	1.12343	-1.12343	0.030356	-0.030356	0.126029	-0.126029	0.0906877	-0.0906877	0.112081	-0.112081	2.03352	-2.03352	0.438481	-0.438481	0.211253	-0.211253	-1.68173	1.68173	0.507576	1
354	OG0003575	196.799	162.702	433.877	276.31	346.465	340.439	358.891	323.242	313.835	260.519	382.228	364.341	211.78	143.544	178.863	129.906	81.1399	218.656	0.472391	-0.472391	1.10505	-1.10505	0.0436959	-0.0436959	0.260294	-0.260294	0.462346	-0.462346	0.119336	-0.119336	0.956485	-0.956485	0.789716	-0.789716	-2.28463	2.28463	0.508401	1
1112	OG0005402	141.221	176.756	209.292	284.057	162.479	173.406	297.44	291.129	251.804	269.101	253.447	239.769	159.357	247.622	132.257	140.559	124.096	75.5992	-0.854338	0.854338	-1.15853	1.15853	-0.248705	0.248705	0.0819672	-0.0819672	-0.25386	0.25386	0.212008	-0.212008	-1.65799	1.65799	-0.232645	0.232645	1.85658	-1.85658	0.510228	1
189	OG0003164	1074.08	2002.7	740.873	675.029	479.221	477.428	629.229	645.231	1110.63	1317.69	513.784	497.342	644.873	507.614	502.408	498.559	540.137	553.037	-2.59152	2.59152	0.399293	-0.399293	0.0160874	-0.0160874	-0.10781	0.10781	-0.732181	0.732181	0.139621	-0.139621	1.02263	-1.02263	0.0330114	-0.0330114	-0.101325	0.101325	0.511555	1
557	OG0004086	168.184	275.305	328.298	214.621	208.688	212.724	189.675	169.144	123.794	156.31	138.446	116.138	193.435	214.758	100.526	84.2341	132.051	165.737	-1.81825	1.81825	1.57615	-1.57615	-0.0721013	0.0721013	0.430707	-0.430707	-0.873852	0.873852	0.659604	-0.659604	-0.393237	0.393237	0.663776	-0.663776	-0.851522	0.851522	0.512505	1
627	OG0004255	80.8318	134.282	189.81	191.505	558.369	592.787	297.277	292.242	110.881	87.9241	345.896	355.438	398.535	375.206	94.9781	97.6811	384.221	406.491	-2.59144	2.59144	-0.0463636	0.0463636	-0.31183	0.31183	0.0890775	-0.0890775	1.20432	-1.20432	-0.14191	0.14191	0.314461	-0.314461	-0.146323	0.146323	-0.293736	0.293736	0.512646	1
895	OG0004887	1467.4	1451.05	840.349	904.755	1290.59	1419.86	1252.18	1195.62	1080.74	1022.23	583.68	685.121	741.18	549.494	598.717	599.026	603.777	533.847	0.084686	-0.084686	-0.557856	0.557856	-0.720895	0.720895	0.349213	-0.349213	0.420518	-0.420518	-1.20846	1.20846	2.24487	-2.24487	-0.00389984	0.00389984	0.929136	-0.929136	0.51383	1
471	OG0003879	75.1037	218.876	33.7788	243.004	190.125	229.921	159.552	393.726	287.648	237.155	899.237	403.683	544.219	307.051	356.614	204.747	295.127	524.542	-1.21297	1.21297	-1.87485	1.87485	-0.234985	0.234985	-1.04975	1.04975	0.238628	-0.238628	0.943335	-0.943335	0.691004	-0.691004	0.670985	-0.670985	-0.694188	0.694188	0.517613	1
1208	OG0005636	109.435	36.7424	555.716	431.211	181.718	206.376	416.479	403.22	139.233	142.695	102.573	98.811	119.368	130.626	110.734	110.621	141.597	188.998	2.68951	-2.68951	0.682287	-0.682287	-0.34362	0.34362	0.0874835	-0.0874835	-0.0664112	0.0664112	0.101027	-0.101027	-0.243562	0.243562	0.00276459	-0.00276459	-0.775453	0.775453	0.518015	1
254	OG0003295	1715.39	1433.14	1772.35	1443.62	579.443	566.394	722.293	703.338	945.152	890.491	715.714	402.737	802.228	880.335	441.602	424.213	424.791	669.925	0.673283	-0.673283	0.76773	-0.76773	0.0855334	-0.0855334	0.0998603	-0.0998603	0.223648	-0.223648	2.10171	-2.10171	-0.348655	0.348655	0.150844	-0.150844	-1.68181	1.68181	0.518409	1
673	OG0004359	1892.4	1489.92	673.141	775.16	923.042	893.796	942.655	838.248	568.16	603.035	599.333	566.641	667.662	731.247	907.394	797.433	634.005	578.625	1.91551	-1.91551	-1.13391	1.13391	0.259122	-0.259122	0.943725	-0.943725	-0.479346	0.479346	0.451346	-0.451346	-0.731678	0.731678	1.03828	-1.03828	0.73516	-0.73516	0.518867	1
140	OG0003057	171.582	156.659	251.685	245.529	232.114	322.853	475.594	462.597	270.041	294.265	387.619	312.486	421.118	380.179	486.654	445.527	550.2	744.943	0.502181	-0.502181	0.136767	-0.136767	-1.80596	1.80596	0.153013	-0.153013	-0.474133	0.474133	1.18536	-1.18536	0.564321	-0.564321	0.487312	-0.487312	-1.66084	1.66084	0.519031	1
9	OG0002771	531.52	727.052	439.625	395.023	414.327	566.705	379.027	350.206	357.621	359.687	910.28	901.943	580.035	460.037	270.954	265.637	504.34	467.558	-1.74275	1.74275	0.599427	-0.599427	-1.74233	1.74233	0.443335	-0.443335	-0.0323118	0.0323118	0.0516098	-0.0516098	1.29421	-1.29421	0.111154	-0.111154	0.424533	-0.424533	0.519501	1
536	OG0004040	1640.72	1970.34	884.491	799.224	2948.46	2391.42	1456.83	1456.56	1070.91	1143.02	1536.4	2103.94	1023.06	1004.57	1075.16	1243.21	4028.34	2358.71	-0.765645	0.765645	0.424773	-0.424773	0.874979	-0.874979	0.00078551	-0.00078551	-0.273183	0.273183	-1.30768	1.30768	0.0764869	-0.0764869	-0.608005	0.608005	2.19262	-2.19262	0.520393	1
972	OG0005069	214.937	166.95	615.824	388.104	594.818	648.579	352.528	356.264	373.907	370.939	396.497	387.751	302.184	291.791	237.443	286.954	216.373	412.307	0.874178	-0.874178	1.57801	-1.57801	-0.300791	0.300791	-0.0366686	0.0366686	0.0277222	-0.0277222	0.0775794	-0.0775794	0.121728	-0.121728	-0.656827	0.656827	-2.16815	2.16815	0.522808	1
835	OG0004739	166.253	143.754	224.148	200.124	257.758	285.741	302.582	270.344	234.397	249.56	312.309	218.62	238.47	248.484	224.579	217.385	167.053	201.204	0.896581	-0.896581	0.699503	-0.699503	-0.636045	0.636045	0.695113	-0.695113	-0.387041	0.387041	2.17988	-2.17988	-0.254046	0.254046	0.201079	-0.201079	-1.14563	1.14563	0.523149	1
527	OG0004019	158.698	163.193	1795.2	1447.85	324.906	184.026	496.697	531.769	375.033	404.395	400.172	356.839	406.674	510.102	883.43	1021.72	400.131	417.546	-0.121317	0.121317	0.930583	-0.930583	2.40505	-2.40505	-0.296285	0.296285	-0.327298	0.327298	0.497342	-0.497342	-0.980195	0.980195	-0.630673	0.630673	-0.185045	0.185045	0.52523	1
1081	OG0005318	2897.38	4198.65	305.133	1095.96	373.164	446.864	659.312	509.552	128.002	92.3648	257.582	423.81	677.974	865.071	130.706	116.456	329.333	171.546	-0.702234	0.702234	-2.16145	2.16145	-0.344169	0.344169	0.490638	-0.490638	0.619276	-0.619276	-0.934198	0.934198	-0.464324	0.464324	0.220778	-0.220778	1.20634	-1.20634	0.52705	1
162	OG0003103	561.023	564.819	818.433	814.602	1112.86	1096.85	424.695	402.817	818.838	791.317	1131.98	983.431	921.324	1020.18	965.315	871.772	876.629	996.747	-0.0794947	0.0794947	0.0553041	-0.0553041	0.170903	-0.170903	0.623397	-0.623397	0.403009	-0.403009	1.65579	-1.65579	-1.20063	1.20063	1.20063	-1.20063	-1.51186	1.51186	0.530483	1
319	OG0003463	479.811	386.974	622.448	718.019	431.252	484.214	657.379	547.119	377.276	352.881	573.575	398.99	669.829	660.249	317.553	297.357	238.647	290.185	1.16172	-1.16172	-0.773327	0.773327	-0.627499	0.627499	0.992896	-0.992896	0.362393	-0.362393	1.94706	-1.94706	0.0781295	-0.0781295	0.356253	-0.356253	-1.05706	1.05706	0.531307	1
741	OG0004511	306.685	366.512	227.038	237.14	490.451	399.03	457.313	404.23	337.701	404.395	439.274	520.748	243.616	193.098	525.711	528.742	250.571	398.92	-0.805084	0.805084	-0.197173	0.197173	0.931108	-0.931108	0.558174	-0.558174	-0.81417	0.81417	-0.76883	0.76883	1.04796	-1.04796	-0.0260402	0.0260402	-2.06919	2.06919	0.531909	1
590	OG0004158	1775.29	1573.72	266.048	248.446	1071.89	1320.43	1697.38	1994.76	1481.03	1155.74	1147.62	1097.69	1734.13	1657.01	1162.15	1195.01	1842.89	2280.55	0.786612	-0.786612	0.447121	-0.447121	-1.3578	1.3578	-1.05264	1.05264	1.61229	-1.61229	0.290609	-0.290609	0.297197	-0.297197	-0.182175	0.182175	-1.38715	1.38715	0.534434	1
585	OG0004149	132.708	154.795	354.458	239.435	237.136	180.716	167.929	215.193	85.8976	107.167	128.791	147.514	172.002	165.062	78.5567	78.1449	221.942	182.601	-0.696251	0.696251	1.75534	-1.75534	1.22376	-1.22376	-1.1181	1.1181	-0.998461	0.998461	-0.614145	0.614145	0.18661	-0.18661	0.0238164	-0.0238164	0.881367	-0.881367	0.535558	1
661	OG0004326	635.001	684.331	673.264	585.092	741.996	893.281	856.313	826.737	660.511	585.273	562.545	557.28	842.648	586.766	515.057	537.37	505.136	619.914	-0.438687	0.438687	0.822109	-0.822109	-1.08543	1.08543	0.20618	-0.20618	0.708586	-0.708586	0.0551651	-0.0551651	2.1003	-2.1003	-0.24876	0.24876	-1.19697	1.19697	0.536539	1
219	OG0003231	123.769	127.888	570.117	447.444	189.42	173.362	165.914	196.914	170.672	147.428	253.902	214.481	312.26	268.718	102.077	84.2366	200.463	333.218	-0.141885	0.141885	1.04491	-1.04491	0.383643	-0.383643	-0.740536	0.740536	0.633334	-0.633334	0.729486	-0.729486	0.649589	-0.649589	0.829939	-0.829939	-2.15602	2.15602	0.536802	1
692	OG0004407	169.431	98.8489	502.436	303.473	183.329	254.225	162.452	141.273	150.739	106.279	340.376	261.31	257.732	167.905	146.908	121.277	131.256	358.806	1.10973	-1.10973	1.04135	-1.04135	-0.683442	0.683442	0.294119	-0.294119	0.729661	-0.729661	0.554277	-0.554277	0.890175	-0.890175	0.403125	-0.403125	-1.95856	1.95856	0.537349	1
1132	OG0005456	418.586	459.516	637.3	549.438	201.579	426.605	676.464	680.818	748.853	729.356	1020.22	892.577	995.388	969.426	540.796	509.464	917.199	938.594	-0.360868	0.360868	0.573204	-0.573204	-2.77335	2.77335	-0.0248348	0.0248348	0.102118	-0.102118	0.51663	-0.51663	0.102302	-0.102302	0.230967	-0.230967	-0.0892533	0.0892533	0.537761	1
1099	OG0005362	753.681	564.902	286.776	341.943	449.605	554.84	593.911	563.276	1042.28	931.345	395.112	522.621	650.027	331.189	601.158	609.175	283.194	523.379	0.82393	-0.82393	-0.504969	0.504969	-0.602946	0.602946	0.152359	-0.152359	0.323484	-0.323484	-0.799591	0.799591	1.87003	-1.87003	-0.0381183	0.0381183	-1.71374	1.71374	0.538802	1
374	OG0003623	135.147	110.135	449.176	305.04	285.348	401.587	336.34	337.379	334.886	301.077	346.356	363.868	292.184	281.848	276.946	287.459	289.566	438.476	0.852914	-0.852914	1.59848	-1.59848	-1.41535	1.41535	-0.0129016	0.0129016	0.444665	-0.444665	-0.206242	0.206242	0.150607	-0.150607	-0.155806	0.155806	-1.71079	1.71079	0.539452	1
706	OG0004441	73.0582	96.3618	265.171	257.501	218.433	188.654	208.442	198.53	181.062	193.608	176.163	171.393	202.387	213.338	123.163	145.634	180.576	151.198	-1.95883	1.95883	0.209002	-0.209002	1.04177	-1.04177	0.346834	-0.346834	-0.476874	0.476874	0.195468	-0.195468	-0.37513	0.37513	-1.1905	1.1905	1.26099	-1.26099	0.539873	1
56	OG0002874	1044.58	934.035	630.933	507.646	451.402	408.78	420.102	395.039	165.305	147.908	172.948	201.841	206.731	168.612	197.06	184.962	40.5779	156.438	0.262713	-0.262713	0.509165	-0.509165	0.232992	-0.232992	0.14458	-0.14458	0.261183	-0.261183	-0.362507	0.362507	0.47755	-0.47755	0.148903	-0.148903	-2.76526	2.76526	0.541929	1
326	OG0003485	721.948	686.503	436.299	317.589	867.708	824.381	427.03	411.904	962.562	966.275	425.935	437.854	379.273	253.454	454.477	413.049	273.64	467.552	0.198317	-0.198317	1.24089	-1.24089	0.201787	-0.201787	0.142082	-0.142082	-0.0151692	0.0151692	-0.108745	0.108745	1.56705	-1.56705	0.376326	-0.376326	-2.0617	2.0617	0.54594	1
1016	OG0005170	1017.86	823.654	540.726	301.862	777.526	669.732	683.606	650.929	573.212	573.431	671.438	592.992	1433.53	1160.39	460.728	445.294	420.018	869.973	0.634888	-0.634888	1.70667	-1.70667	0.448395	-0.448395	0.147411	-0.147411	-0.00114898	0.00114898	0.373498	-0.373498	0.633929	-0.633929	0.102556	-0.102556	-2.09989	2.09989	0.546539	1
757	OG0004550	99.4752	103.775	252.685	117.846	202.153	213.332	217.22	160.258	1846.61	2116.94	165.588	140.958	122.626	85.1934	175.754	100.979	82.7309	319.261	-0.0783884	0.0783884	1.34836	-1.34836	-0.0996885	0.0996885	0.559123	-0.559123	-0.252713	0.252713	0.297709	-0.297709	0.667391	-0.667391	1.00117	-1.00117	-2.18014	2.18014	0.547135	1
1029	OG0005198	301.671	245.66	258.742	151.149	216.37	190.476	315.078	334.856	335.733	315.879	448.468	452.845	1405.86	917.958	200.606	174.809	137.62	297.163	0.575512	-0.575512	1.47619	-1.47619	0.357928	-0.357928	-0.171135	0.171135	0.171359	-0.171359	-0.027305	0.027305	1.18075	-1.18075	0.386447	-0.386447	-2.06364	2.06364	0.548589	1
1046	OG0005236	462.418	430.313	385.178	349.489	538.396	524.645	859.305	940.892	320.008	316.462	366.134	376.507	872.491	942.444	388.565	366.621	477.302	435.568	1.02221	-1.02221	1.38082	-1.38082	0.367684	-0.367684	-1.28821	1.28821	0.158371	-0.158371	-0.397022	0.397022	-1.09556	1.09556	0.825925	-0.825925	1.29947	-1.29947	0.548767	1
1107	OG0005389	541.005	535.568	624.065	732.366	273.777	259.727	270.619	332.029	195.656	251.339	143.97	179.358	344.276	698.586	181.302	179.124	422.405	161.085	0.0245031	-0.0245031	-0.387417	0.387417	0.127787	-0.127787	-0.494449	0.494449	-0.604458	0.604458	-0.531084	0.531084	-1.64855	1.64855	0.0293131	-0.0293131	2.17313	-2.17313	0.548929	1
784	OG0004603	70.9254	69.638	33.529	53.7588	170.955	108.588	129.51	116.937	430.892	447.025	79.5698	95.9918	135.993	201.734	168.429	185.975	101.019	78.5127	0.0645115	-0.0645115	-1.63247	1.63247	1.57148	-1.57148	0.359348	-0.359348	-0.129439	0.129439	-0.658874	0.658874	-1.37113	1.37113	-0.348729	0.348729	0.883023	-0.883023	0.551559	1
736	OG0004497	2208.61	1991.44	105.332	131.995	349.779	416.042	735.947	605.744	910.63	937.855	703.865	733.884	592.512	506.191	1086.03	979.858	1044.54	836.913	0.649636	-0.649636	-1.41157	1.41157	-1.08713	1.08713	1.21929	-1.21929	-0.185046	0.185046	-0.262331	0.262331	0.987134	-0.987134	0.645738	-0.645738	1.38653	-1.38653	0.551908	1
751	OG0004538	532.941	515.36	1237.45	1452.56	1916.28	1931.16	1031.81	1048.9	1130.99	1394.94	983.406	944.558	1198.05	1116.39	1360.1	1341.15	1121.64	984.535	0.318178	-0.318178	-1.5171	1.5171	-0.0733881	0.0733881	-0.155764	0.155764	-1.98253	1.98253	0.382279	-0.382279	0.669363	-0.669363	0.13305	-0.13305	1.235	-1.235	0.554651	1
885	OG0004856	143.335	153.569	535.03	491.191	120.615	141.51	120.731	110.676	128.563	127.597	103.957	141.894	112.317	108.977	161.995	151.469	179.781	112.817	-0.337222	0.337222	0.417925	-0.417925	-0.779835	0.779835	0.425075	-0.425075	0.0369064	-0.0369064	-1.50961	1.50961	0.147674	-0.147674	0.328517	-0.328517	2.23892	-2.23892	0.555427	1
1078	OG0005314	334.409	272.736	841.971	764.451	439.588	460.144	564.594	525.105	451.1	520.44	448.928	528.231	505.149	438.387	416.089	402.654	345.242	396.035	1.55797	-1.55797	0.740131	-0.740131	-0.350404	0.350404	0.555818	-0.555818	-1.09465	1.09465	-1.24474	1.24474	1.08524	-1.08524	0.251665	-0.251665	-1.05094	1.05094	0.556547	1
633	OG0004265	3105.98	2753.85	1172.45	900.525	4417.13	4471.49	2422.28	2831.32	2497.08	1984.37	5188.42	5032.08	2654.91	4043.85	1704.77	1624.7	6040.14	4483.62	0.538912	-0.538912	1.17641	-1.17641	-0.054852	0.054852	-0.698258	0.698258	1.026	-1.026	0.137186	-0.137186	-1.85947	1.85947	0.215692	-0.215692	1.32643	-1.32643	0.562454	1
919	OG0004949	227.357	269.152	735.952	604.509	228.347	201.632	481.717	485.722	552.72	460.936	1129.12	895.18	842.919	609.487	358.387	362.559	582.298	1164.81	-0.579815	0.579815	0.675414	-0.675414	0.427959	-0.427959	-0.0285104	0.0285104	0.623683	-0.623683	0.796011	-0.796011	1.10702	-1.10702	-0.0398612	0.0398612	-2.29651	2.29651	0.562579	1
776	OG0004592	199.041	173.338	1213.54	1449.32	1271.69	1152.89	452.965	542.775	587.24	449.432	911.656	707.299	795.44	972.979	419.857	425.737	1384.16	1142.13	0.729701	-0.729701	-0.936098	0.936098	0.518012	-0.518012	-0.95354	0.95354	1.40537	-1.40537	1.33448	-1.33448	-1.06137	1.06137	-0.0735254	0.0735254	1.01285	-1.01285	0.563759	1
523	OG0004013	196.471	193.349	980.084	990.173	229.794	218.848	114.208	109.867	171.517	164.889	152.254	150.324	126.158	98.3273	143.355	121.277	128.082	180.857	0.101434	-0.101434	-0.0648497	0.0648497	0.308969	-0.308969	0.245306	-0.245306	0.249525	-0.249525	0.08078	-0.08078	1.57002	-1.57002	1.05653	-1.05653	-2.1633	2.1633	0.564801	1
856	OG0004797	1006.81	789.688	383.969	730.256	1000.38	848.081	232.528	303.015	563.668	567.211	928.219	1444.38	915.006	933.531	1362.09	1609.07	2418.92	1000.79	0.585952	-0.585952	-1.50676	1.50676	0.399452	-0.399452	-0.638104	0.638104	-0.0151901	0.0151901	-1.05473	1.05473	-0.0485868	0.0485868	-0.403012	0.403012	2.01051	-2.01051	0.565158	1
94	OG0002961	1245.08	1124	1068.18	1130.18	1791.88	1778.53	960.213	915.198	759.046	670.237	847.265	874.781	1152.74	940.322	647.538	655.859	820.142	955.458	0.956614	-0.956614	-0.527844	0.527844	0.0699977	-0.0699977	0.449272	-0.449272	1.16302	-1.16302	-0.299084	0.299084	1.8996	-1.8996	-0.119496	0.119496	-1.42643	1.42643	0.565986	1
948	OG0005014	474.093	366.047	810.316	554.794	950.875	872.011	623.389	643.051	405.347	490.543	793.444	759.116	762.073	677.291	650.425	651.548	672.984	811.825	1.36515	-1.36515	1.98694	-1.98694	0.459247	-0.459247	-0.164809	0.164809	-1.00946	1.00946	0.234704	-0.234704	0.625257	-0.625257	-0.00915934	0.00915934	-0.992594	0.992594	0.566256	1
1108	OG0005391	816.587	889.33	970.343	897.141	1483.08	1512.6	920.103	916.712	851.684	784.807	989.39	857.454	798.969	863.289	792.444	681.325	973.671	1209.58	-0.728947	0.728947	0.670082	-0.670082	-0.168433	0.168433	0.0315586	-0.0315586	0.698587	-0.698587	1.22122	-1.22122	-0.661468	0.661468	1.28891	-1.28891	-1.84717	1.84717	0.567873	1
689	OG0004400	111.608	112.908	1204.37	1132.22	113.931	165.949	167.283	151.979	108.074	84.6647	198.241	150.797	308.191	370.588	109.844	106.305	133.642	215.749	-0.0459633	0.0459633	0.245019	-0.245019	-1.47478	1.47478	0.380364	-0.380364	0.963739	-0.963739	1.07859	-1.07859	-0.729423	0.729423	0.129919	-0.129919	-1.8647	1.8647	0.568589	1
828	OG0004711	151.891	236.63	253.686	237.868	274.216	265.652	410.683	386.053	214.741	187.098	202.846	269.272	262.073	216.885	304.68	301.926	176.599	184.927	-2.1967	2.1967	0.324098	-0.324098	0.159761	-0.159761	0.311356	-0.311356	0.692856	-0.692856	-1.41707	1.41707	0.950236	-0.950236	0.0457269	-0.0457269	-0.232028	0.232028	0.569062	1
1144	OG0005479	572.539	509.55	685.94	452.402	447.192	485.011	516.753	510.058	308.785	306.698	461.347	393.371	434.075	360.652	408.093	374.997	268.08	436.731	0.487717	-0.487717	1.71891	-1.71891	-0.339917	0.339917	0.0546252	-0.0546252	0.0284078	-0.0284078	0.666359	-0.666359	0.774079	-0.774079	0.354112	-0.354112	-2.00487	2.00487	0.569151	1
1170	OG0005536	153.145	162.938	234.197	258.911	128.33	174.12	85.6154	90.8845	115.092	105.391	84.634	87.1035	114.759	84.8384	73.8988	58.8624	128.074	115.725	-0.348231	0.348231	-0.563286	0.563286	-1.70155	1.70155	-0.335527	0.335527	0.494513	-0.494513	-0.16161	0.16161	1.68478	-1.68478	1.27293	-1.27293	0.569281	-0.569281	0.569456	1
912	OG0004934	720.685	623.731	715.848	764.753	910.949	964.942	640.061	601.952	501.347	485.806	517.008	413.98	963.912	714.197	454.919	364.338	308.642	481.503	0.655807	-0.655807	-0.300372	0.300372	-0.261746	0.261746	0.279032	-0.279032	0.143169	-0.143169	1.00636	-1.00636	1.35322	-1.35322	1.00545	-1.00545	-1.98946	1.98946	0.569596	1
874	OG0004830	1902.39	1874.68	2231.58	4205.38	1445	1421.39	2362.6	1661.75	1745.74	2095.37	365.679	695.891	901.514	883.168	2285.9	2195.92	1122.44	660.621	0.0392401	-0.0392401	-1.64011	1.64011	0.0440603	-0.0440603	0.931497	-0.931497	-0.486859	0.486859	-1.66378	1.66378	0.0549849	-0.0549849	0.107389	-0.107389	1.38533	-1.38533	0.569768	1
280	OG0003365	820.079	912.434	732.457	661.189	707.055	804.461	797.265	823.307	1148.67	1219.09	847.725	837.795	872.762	861.876	705.008	753.033	1115.27	806.591	-0.800336	0.800336	0.767775	-0.767775	-0.967538	0.967538	-0.24127	0.24127	-0.446566	0.446566	0.0884493	-0.0884493	0.0942193	-0.0942193	-0.494518	0.494518	2.41143	-2.41143	0.571987	1
712	OG0004448	596.545	622.541	362.138	412.394	638.25	656.623	557.104	688.391	717.498	742.175	516.792	718.548	700.491	643.206	715.667	815.698	904.472	548.385	-0.188223	0.188223	-0.572739	0.572739	-0.125248	0.125248	-0.93045	0.93045	-0.149225	0.149225	-1.44163	1.44163	0.376316	-0.376316	-0.576595	0.576595	2.16344	-2.16344	0.572497	1
884	OG0004852	68.7302	76.2983	217.159	109.747	180.211	235.03	592.783	586.802	112.287	108.647	164.208	132.997	107.162	73.8342	101.194	85.5002	41.3655	86.6483	-0.27524	0.27524	1.73303	-1.73303	-0.696321	0.696321	0.0267417	-0.0267417	0.0869064	-0.0869064	0.553909	-0.553909	0.971219	-0.971219	0.443377	-0.443377	-1.86576	1.86576	0.572503	1
872	OG0004827	554.84	517.624	541.645	474.952	482.147	460.795	1479.54	1731.53	260.219	212.56	694.1	566.177	375.204	342.541	389.896	386.409	186.94	540.244	0.19442	-0.19442	0.36756	-0.36756	0.126869	-0.126869	-0.439667	0.439667	0.564783	-0.564783	0.568692	-0.568692	0.254961	-0.254961	0.0251701	-0.0251701	-2.72207	2.72207	0.573191	1
978	OG0005083	121.807	99.3189	61.7502	77.4468	157.452	220.759	533.666	524.545	556.65	527.841	407.996	340.458	485.966	499.457	555.449	530.266	374.676	341.36	1.18233	-1.18233	-1.31097	1.31097	-1.94598	1.94598	0.100208	-0.100208	0.308836	-0.308836	1.04907	-1.04907	-0.159159	0.159159	0.269652	-0.269652	0.540925	-0.540925	0.573568	1
897	OG0004898	492.197	465.901	319.305	330.377	575.391	587.066	359.617	357.373	307.66	311.438	367.054	336.238	406.671	312.021	265.63	230.121	204.441	265.173	0.38901	-0.38901	-0.24155	0.24155	-0.14235	0.14235	0.0443539	-0.0443539	-0.0865043	0.0865043	0.621044	-0.621044	1.86665	-1.86665	1.01521	-1.01521	-1.833	1.833	0.573629	1
276	OG0003353	2652.3	3363.21	1818.12	3916.72	1635.35	1512.01	1483.06	1636.13	2527.24	3056.03	758.491	1246.14	877.868	1230.31	2301.18	2899.49	2684.78	576.299	-0.41808	0.41808	-1.29456	1.29456	0.138643	-0.138643	-0.173607	0.173607	-0.335046	0.335046	-0.860572	0.860572	-0.591416	0.591416	-0.406988	0.406988	2.28729	-2.28729	0.57546	1
669	OG0004344	326.782	354.137	232.266	141.483	483.944	592.88	267.557	342.227	289.972	250.152	369.349	398.513	303.03	255.58	148.57	137.236	517.864	565.244	-0.3642	0.3642	2.20205	-2.20205	-0.917128	0.917128	-1.11013	1.11013	0.668369	-0.668369	-0.344316	0.344316	0.77008	-0.77008	0.35952	-0.35952	-0.396579	0.396579	0.577802	1
995	OG0005123	201.351	236.55	277.535	231.424	239.914	224.983	400.45	412.511	221.2	262.585	227.679	184.51	246.766	259.95	172.425	151.218	168.636	198.878	-1.09325	1.09325	1.23222	-1.23222	0.436821	-0.436821	-0.201777	0.201777	-1.16347	1.16347	1.42447	-1.42447	-0.353864	0.353864	0.891224	-0.891224	-1.11921	1.11921	0.579339	1
994	OG0005122	192.424	203.217	1552.33	1404.2	264.404	210.809	301.385	334.147	260.5	222.626	228.604	233.213	168.747	118.206	88.4917	83.5237	163.075	266.923	-0.23447	0.23447	0.430622	-0.430622	0.969373	-0.969373	-0.443078	0.443078	0.673805	-0.673805	-0.0857746	0.0857746	1.51385	-1.51385	0.248233	-0.248233	-2.07578	2.07578	0.57977	1
28	OG0002811	325.07	326.714	289.4	316.708	181.97	279.35	278.513	280.225	203.799	165.78	252.982	220.569	342.105	308.826	203.491	169.483	182.167	270.413	-0.0220856	0.0220856	-0.394594	0.394594	-1.84871	1.84871	-0.0268443	0.0268443	0.90095	-0.90095	0.599468	-0.599468	0.44776	-0.44776	0.798549	-0.798549	-1.70766	1.70766	0.581053	1
662	OG0004327	58.378	89.8403	145.23	107.92	199.32	198.827	124.365	112.494	122.952	127.298	165.588	139.553	176.886	140.214	85.4359	86.5201	121.71	198.89	-1.60735	1.60735	1.116	-1.116	0.00936792	-0.00936792	0.379533	-0.379533	-0.131506	0.131506	0.646079	-0.646079	0.875699	-0.875699	-0.047742	0.047742	-1.8229	1.8229	0.582017	1
868	OG0004819	440.055	340.993	633.991	865.028	57.9667	156.806	738.443	662.509	1612.4	1383.99	1185.34	984.363	1036.35	980.434	1143.95	1161.01	2062.7	1524.78	0.683987	-0.683987	-0.831183	0.831183	-2.48183	2.48183	0.292304	-0.292304	0.411093	-0.411093	0.499538	-0.499538	0.149531	-0.149531	-0.0399056	0.0399056	0.808627	-0.808627	0.58263	1
929	OG0004971	54.6019	75.2473	775.778	1098.74	664.318	627.794	634.827	660.723	954.415	1270.61	450.777	674.823	754.295	945.387	1421.56	1433.25	569.57	241.336	-0.857135	0.857135	-0.928815	0.928815	0.152385	-0.152385	-0.107756	0.107756	-0.766098	0.766098	-1.07304	1.07304	-0.606094	0.606094	-0.0220713	0.0220713	2.18212	-2.18212	0.583441	1
292	OG0003402	292.068	291.058	905.095	808.898	317.237	211.742	331.185	293.15	874.696	982.264	189.047	214.476	341.023	302.788	126.49	112.397	126.483	183.77	0.0163723	-0.0163723	0.530702	-0.530702	1.88578	-1.88578	0.576057	-0.576057	-0.547742	0.547742	-0.595887	0.595887	0.561566	-0.561566	0.557834	-0.557834	-1.74598	1.74598	0.583782	1
356	OG0003579	376.049	337.675	275.475	214.882	1231.64	1275.39	371.699	430.085	626.264	535.834	999.505	804.073	618.831	620.843	851.921	836.508	990.384	1282.28	0.65005	-0.65005	1.49404	-1.49404	-0.210976	0.210976	-0.880442	0.880442	0.940844	-0.940844	1.31011	-1.31011	-0.0196245	0.0196245	0.110366	-0.110366	-1.55289	1.55289	0.583827	1
314	OG0003449	247.681	235.475	113.824	86.719	136.265	389.566	92.1392	88.157	78.8799	81.7102	108.092	73.9911	103.635	89.0981	79.2224	63.4293	67.6166	123.285	0.117965	-0.117965	0.631147	-0.631147	-2.24943	2.24943	0.103139	-0.103139	-0.0823019	0.0823019	0.874546	-0.874546	0.352218	-0.352218	0.51698	-0.51698	-1.3617	1.3617	0.585633	1
847	OG0004776	281.001	302.951	366.884	326.547	132.34	135.123	257.892	259.422	398.329	328.013	297.65	468.973	251.218	485.606	243.295	250.713	862.533	548.391	-0.23622	0.23622	0.365566	-0.365566	-0.0653872	0.0653872	-0.0185912	0.0185912	0.608392	-0.608392	-1.40445	1.40445	-1.99913	1.99913	-0.0943713	0.0943713	1.39925	-1.39925	0.586782	1
178	OG0003143	202.324	191.767	526.351	541.078	142.273	136.071	10589.6	13649.3	1161.02	1184.16	901.532	898.206	469.615	430.226	3760.51	6226.22	696.849	171.546	0.116912	-0.116912	-0.0602164	0.0602164	0.0972472	-0.0972472	-0.550917	0.550917	-0.0430781	0.0430781	0.00806626	-0.00806626	0.191043	-0.191043	-1.07757	1.07757	2.6401	-2.6401	0.588989	1
1036	OG0005210	271.457	188.835	572.366	323.369	214.247	289.406	242.591	231.45	202.393	201.012	172.948	169.992	188.551	255.229	409.429	354.955	118.528	205.863	1.08524	-1.08524	1.68065	-1.68065	-0.902229	0.902229	0.142094	-0.142094	0.0206981	-0.0206981	0.0521046	-0.0521046	-0.908392	0.908392	0.430861	-0.430861	-1.62773	1.62773	0.59137	1
848	OG0004777	316.866	269.477	102.085	71.8745	272.675	227.029	183.313	154.099	338.254	411.784	351.406	363.863	211.88	230.377	320.951	382.562	389.002	391.371	0.878921	-0.878921	1.88857	-1.88857	0.993383	-0.993383	0.941563	-0.941563	-1.06611	1.06611	-0.189396	0.189396	-0.454827	0.454827	-0.952389	0.952389	-0.0330142	0.0330142	0.596142	1
304	OG0003427	575.729	556.532	249.211	274.703	999.119	1038.02	743.958	796.541	728.224	792.149	946.613	1061.16	484.805	707.101	1263.85	1361.94	1313.36	735.639	0.139876	-0.139876	-0.401417	0.401417	-0.157553	0.157553	-0.281605	0.281605	-0.346878	0.346878	-0.470675	0.470675	-1.53867	1.53867	-0.308179	0.308179	2.32612	-2.32612	0.596954	1
698	OG0004420	161.517	106.293	320.304	271.302	514.774	636.315	295.263	299.008	276.22	295.15	333.021	358.717	352.415	275.817	331.092	335.16	349.22	307.637	2.09997	-2.09997	0.843524	-0.843524	-1.0753	1.0753	-0.0641637	0.0641637	-0.3374	0.3374	-0.378292	0.378292	1.24168	-1.24168	-0.0621873	0.0621873	0.644707	-0.644707	0.599731	1
1090	OG0005343	165.012	194.986	394.917	326.762	278.757	338.534	230.669	244.175	263.869	236.833	158.689	221.973	275.098	235.347	219.246	221.495	272.853	184.927	-0.769275	0.769275	0.872556	-0.872556	-0.8947	0.8947	-0.262779	0.262779	0.498885	-0.498885	-1.53602	1.53602	0.719514	-0.719514	-0.0471407	0.0471407	1.77458	-1.77458	0.601354	1
740	OG0004510	717.196	653.012	469.218	597.935	388.399	496.638	380.478	358.283	334.605	338.375	339.456	242.579	403.961	365.618	271.842	231.39	241.033	369.855	0.404923	-0.404923	-1.04266	1.04266	-1.0572	1.0572	0.259705	-0.259705	-0.0484219	0.0484219	1.43882	-1.43882	0.430692	-0.430692	0.694864	-0.694864	-1.82288	1.82288	0.603853	1
651	OG0004296	170.301	143.068	70.9298	155.894	148.336	138.734	250.806	221.453	130.531	152.165	88.7737	79.6107	96.853	108.622	252.311	227.331	217.956	56.9902	0.354646	-0.354646	-1.52863	1.52863	0.136491	-0.136491	0.253642	-0.253642	-0.312303	0.312303	0.22207	-0.22207	-0.233732	0.233732	0.212539	-0.212539	2.38912	-2.38912	0.607194	1
1086	OG0005334	300.845	300.487	693.869	623.663	244.516	218.703	240.094	223.068	186.673	187.394	302.199	414.449	917.526	557.307	275.168	298.879	103.414	230.868	0.00355839	-0.00355839	0.318065	-0.318065	0.33263	-0.33263	0.219411	-0.219411	-0.0115035	0.0115035	-0.93494	0.93494	1.4579	-1.4579	-0.246548	0.246548	-2.27586	2.27586	0.609371	1
153	OG0003081	365.908	180.383	355.521	318.537	275.392	604.458	430.574	446.745	318.051	280.946	450.768	388.224	390.936	325.155	351.281	324.502	408.086	490.819	1.85001	-1.85001	0.298887	-0.298887	-2.03737	2.03737	-0.100406	0.100406	0.337451	-0.337451	0.406092	-0.406092	0.500416	-0.500416	0.215871	-0.215871	-0.501373	0.501373	0.609909	1
1128	OG0005440	733.388	673.568	1536.72	1448.63	191.277	152.942	551.627	522.983	576.019	629.087	717.416	732.053	162.236	128.141	656.638	713.453	850.386	1717.85	0.322844	-0.322844	0.224057	-0.224057	0.845645	-0.845645	0.202399	-0.202399	-0.334369	0.334369	-0.076679	0.076679	0.891539	-0.891539	-0.314871	0.314871	-2.56473	2.56473	0.611548	1
788	OG0004615	510.269	451.286	513.189	432.443	555.059	676.391	772.069	891.868	707.673	654.84	963.172	922.075	1003.64	906.83	805.093	762.164	1214.71	1600.96	0.799314	-0.799314	1.11266	-1.11266	-1.28388	1.28388	-0.938167	0.938167	0.505283	-0.505283	0.28406	-0.28406	0.660296	-0.660296	0.356923	-0.356923	-1.78751	1.78751	0.611615	1
671	OG0004355	195.533	229.695	1204.55	1463.73	790.805	790.273	459.167	443.917	567.04	477.227	817.367	729.159	822.843	704.269	496.642	489.42	522.637	910.686	-0.718723	0.718723	-0.86899	0.86899	0.00301032	-0.00301032	0.15107	-0.15107	0.769422	-0.769422	0.510255	-0.510255	0.69464	-0.69464	0.0655221	-0.0655221	-2.42204	2.42204	0.612161	1
543	OG0004053	887.506	796.757	755.246	578.562	187.674	295.317	827.803	750.294	622.618	701.913	655.454	310.482	487.789	570.086	364.379	389.456	229.896	504.189	0.265359	-0.265359	0.652393	-0.652393	-1.09762	1.09762	0.241894	-0.241894	-0.294842	0.294842	1.75889	-1.75889	-0.383134	0.383134	-0.163835	0.163835	-1.84022	1.84022	0.61244	1
482	OG0003903	1930.92	1984.19	306.007	322.106	113.595	131.749	232.2	234.277	321.131	341.921	243.327	262.715	276.178	227.896	203.713	189.524	320.582	257.032	-0.22397	0.22397	-0.421917	0.421917	-1.21804	1.21804	-0.0732916	0.0732916	-0.516144	0.516144	-0.630665	0.630665	1.57668	-1.57668	0.593926	-0.593926	1.81108	-1.81108	0.614414	1
615	OG0004229	256.171	324.847	810.065	1117.47	548.067	567.769	217.703	298.667	454.472	545.899	264.021	498.738	469.886	429.52	569.651	502.87	591.049	249.477	-0.592408	0.592408	-0.799301	0.799301	-0.0884941	0.0884941	-0.78585	0.78585	-0.458063	0.458063	-1.54228	1.54228	0.224941	-0.224941	0.312073	-0.312073	2.03675	-2.03675	0.614822	1
193	OG0003173	466.787	453.057	412.401	389.73	94.7799	183.292	365.738	341.015	387.101	364.722	252.982	238.832	297.884	200.559	192.175	217.436	169.439	202.368	0.110513	-0.110513	0.209267	-0.209267	-2.35678	2.35678	0.259002	-0.259002	0.220388	-0.220388	0.213024	-0.213024	1.44571	-1.44571	-0.456604	0.456604	-0.655729	0.655729	0.615181	1
485	OG0003908	94.1494	113.015	651.536	1099.31	314.609	345.29	155.768	182.979	112.285	83.1905	170.648	163.904	142.431	110.041	94.5343	71.802	137.62	212.259	-0.616403	0.616403	-1.73112	1.73112	-0.314708	0.314708	-0.543737	0.543737	1.00746	-1.00746	0.13644	-0.13644	0.868373	-0.868373	0.925068	-0.925068	-1.444	1.444	0.615484	1
659	OG0004318	50.7042	80.8495	60.065	68.7401	1508.17	1529.92	485.825	563.781	806.203	540.574	805.863	714.155	486.978	445.135	606.482	532.296	685.211	864.152	-1.89149	1.89149	-0.555937	0.555937	-0.0590723	0.0590723	-0.613068	0.613068	1.62805	-1.62805	0.49802	-0.49802	0.370542	-0.370542	0.537736	-0.537736	-0.95333	0.95333	0.615721	1
947	OG0005012	249.533	358.713	155.094	188.966	237.001	216.418	226.998	212.356	264.43	272.062	141.21	179.354	220.838	293.917	343.295	293.038	209.214	91.8821	-1.07342	1.07342	-0.588721	0.588721	0.271466	-0.271466	0.199292	-0.199292	-0.0850662	0.0850662	-0.711561	0.711561	-0.848976	0.848976	0.472296	-0.472296	2.33032	-2.33032	0.616766	1
866	OG0004816	88.5648	108.03	323.24	256.936	519.502	459.259	344.637	318.497	321.976	300.778	361.53	317.038	339.124	269.786	339.747	320.447	217.169	418.128	-0.751496	0.751496	0.867423	-0.867423	0.467171	-0.467171	0.299189	-0.299189	0.258363	-0.258363	0.497662	-0.497662	0.864297	-0.864297	0.221878	-0.221878	-2.40092	2.40092	0.618323	1
1200	OG0005624	496.896	349.239	359.266	479.348	465.442	439.821	349.865	440.87	367.173	445.423	164.664	265.52	228.975	144.477	281.501	319.321	416.836	263.434	1.04896	-1.04896	-0.860724	0.860724	0.170124	-0.170124	-0.691797	0.691797	-0.578834	0.578834	-1.40927	1.40927	1.36004	-1.36004	-0.378367	0.378367	1.35548	-1.35548	0.619965	1
730	OG0004486	25.6592	79.138	775.662	932.229	462.749	472.169	569.064	504.612	456.72	621.686	242.863	288.945	366.405	362.267	691.922	688.591	348.424	246.57	-2.57909	2.57909	-0.463316	0.463316	-0.0509242	0.0509242	0.303384	-0.303384	-0.77312	0.77312	-0.437936	0.437936	0.0287037	-0.0287037	0.0121958	-0.0121958	0.865173	-0.865173	0.620379	1
68	OG0002910	476.74	507.124	372.502	464.722	843.773	803.873	391.189	366.663	428.646	540.272	207.905	277.233	412.371	374.496	584.515	596.487	443.883	159.34	-0.172216	0.172216	-0.614241	0.614241	0.13504	-0.13504	0.180465	-0.180465	-0.642444	0.642444	-0.796889	0.796889	0.26842	-0.26842	-0.0565278	0.0565278	2.63044	-2.63044	0.620383	1
814	OG0004678	1225.32	1227.5	653.658	1082.94	1107.44	1165.82	695.313	627.298	572.654	657.806	749.752	585.373	1051.82	735.861	811.089	713.453	425.587	680.393	-0.00623917	0.00623917	-1.73385	1.73385	-0.180146	0.180146	0.360692	-0.360692	-0.485393	0.485393	0.863554	-0.863554	1.23966	-1.23966	0.449197	-0.449197	-1.61595	1.61595	0.621647	1
33	OG0002817	172.225	172.957	392.42	417.532	288.601	248.032	519.814	550.147	362.395	414.161	218.245	279.921	325.459	293.793	391.896	384.125	222.729	203.199	-0.0345574	0.0345574	-0.504739	0.504739	1.2307	-1.2307	-0.461511	0.461511	-1.08519	1.08519	-2.01545	2.01545	0.832451	-0.832451	0.163008	-0.163008	0.746452	-0.746452	0.624166	1
241	OG0003270	188.012	180.217	330.11	217.58	441.777	376.7	338.114	381.105	456.147	452.937	361.539	407.415	544.764	472.82	249.426	224.032	244.215	350.088	0.199454	-0.199454	1.93594	-1.93594	0.749175	-0.749175	-0.563217	0.563217	0.033278	-0.033278	-0.562138	0.562138	0.666174	-0.666174	0.50537	-0.50537	-1.67856	1.67856	0.626013	1
5	OG0002763	118.992	149.506	202.36	175.832	275.21	252.825	308.794	299.108	306.534	309.07	201.93	226.656	209.444	216.888	308.457	342.013	159.893	174.46	-1.97672	1.97672	1.22001	-1.22001	0.737363	-0.737363	0.277158	-0.277158	-0.0716461	0.0716461	-1.00346	1.00346	-0.303705	0.303705	-0.897283	0.897283	-0.757755	0.757755	0.626383	1
1194	OG0005607	71.4867	136.592	289.523	337.517	233.785	215.417	172.279	150.766	434.822	277.094	279.2	239.3	128.595	189.197	70.7876	42.622	46.1384	245.407	-1.06761	1.06761	-0.261163	0.261163	0.139526	-0.139526	0.227237	-0.227237	0.755969	-0.755969	0.262571	-0.262571	-0.650684	0.650684	0.847413	-0.847413	-2.33216	2.33216	0.62659	1
321	OG0003467	88.5242	99.7005	343.471	320.884	409.23	458.36	635.55	627.095	515.667	622.577	556.565	657.482	661.104	981.853	564.319	528.493	972.088	607.707	-0.508163	0.508163	0.290957	-0.290957	-0.48463	0.48463	0.0573096	-0.0573096	-0.803835	0.803835	-0.711389	0.711389	-1.67079	1.67079	0.280565	-0.280565	1.97395	-1.97395	0.627332	1
711	OG0004447	910.15	767.446	500.687	412.133	901.977	876.21	329.332	364.444	540.919	403.447	885.438	764.263	453.172	486.738	570.452	525.058	490.817	712.383	0.861318	-0.861318	0.982281	-0.982281	0.146725	-0.146725	-0.512439	0.512439	1.47396	-1.47396	0.743738	-0.743738	-0.361604	0.361604	0.419569	-0.419569	-1.86457	1.86457	0.630147	1
383	OG0003642	1783.59	1555.07	1530.66	1730.16	1366.87	1202.14	1188.95	1096.26	1344.88	1392.87	1171.07	1219.92	1408.3	1403.2	1629.49	1565.69	1177.34	1152.03	1.60654	-1.60654	-1.43597	1.43597	1.50499	-1.50499	0.952013	-0.952013	-0.411401	0.411401	-0.479477	0.479477	0.042599	-0.042599	0.468696	-0.468696	0.255054	-0.255054	0.63058	1
165	OG0003114	208.264	179	134.366	112.361	229.911	210.196	106.234	102.595	99.6525	116.048	111.772	128.782	100.651	107.912	76.1156	58.355	93.0723	141.894	0.740229	-0.740229	0.873658	-0.873658	0.4388	-0.4388	0.170678	-0.170678	-0.744577	0.744577	-0.692668	0.692668	-0.341006	0.341006	1.2938	-1.2938	-2.03537	2.03537	0.631391	1
423	OG0003743	110.264	97.9949	305.944	251.45	631.122	676.537	435.405	483.297	836.068	808.396	1198.33	968.432	637.276	622.32	886.699	877.948	1382.58	1638.14	0.907564	-0.907564	1.50611	-1.50611	-0.535027	0.535027	-0.80308	0.80308	0.259228	-0.259228	1.63452	-1.63452	0.182926	-0.182926	0.0763939	-0.0763939	-1.30331	1.30331	0.631658	1
466	OG0003866	1479.92	1022.65	2076.86	1893.33	139.808	92.1152	602.031	734.542	565.352	641.521	908.431	984.368	775.215	825.428	637.776	713.199	1339.6	1001.97	1.55	-1.55	0.392128	-0.392128	1.7444	-1.7444	-0.840995	0.840995	-0.535364	0.535364	-0.340316	0.340316	-0.26611	0.26611	-0.473581	0.473581	1.22312	-1.22312	0.633097	1
1192	OG0005602	340.237	279.349	397.511	324.404	146.455	222.698	554.93	538.131	581.634	579.944	685.821	666.857	497.284	413.891	682.82	667.532	326.954	424.519	0.963819	-0.963819	0.993217	-0.993217	-2.02565	2.02565	0.150731	-0.150731	0.014266	-0.014266	0.1375	-0.1375	0.897636	-0.897636	0.111031	-0.111031	-1.27335	1.27335	0.637159	1
1088	OG0005338	375.425	424.423	1830.17	2006.6	2853.31	2844.43	1445.8	1322.05	2366.94	2633.83	1866.53	1768.74	2201.79	1793.79	1971.46	1844.27	1790.65	2663.44	-0.720909	0.720909	-0.541131	0.541131	0.0183409	-0.0183409	0.526143	-0.526143	-0.628066	0.628066	0.316587	-0.316587	1.2017	-1.2017	0.392293	-0.392293	-2.306	2.306	0.637492	1
1212	OG0005641	216.808	194.721	268.982	131.123	254.967	253.763	135.39	159.147	118.179	109.239	302.659	258.028	268.858	241.381	142.245	146.395	64.4346	386.719	0.194172	-0.194172	1.24656	-1.24656	0.00856073	-0.00856073	-0.291815	0.291815	0.142227	-0.142227	0.287984	-0.287984	0.194824	-0.194824	-0.052011	0.052011	-2.58444	2.58444	0.63826	1
695	OG0004414	140.61	230.526	444.808	587.399	336.593	326.012	237.325	225.324	888.729	1257.58	170.648	214.481	196.422	205.174	845.924	1079.31	539.334	45.9411	-0.767479	0.767479	-0.437609	0.437609	0.0505857	-0.0505857	0.0821715	-0.0821715	-0.544399	0.544399	-0.360539	0.360539	-0.0690391	0.0690391	-0.384014	0.384014	2.6705	-2.6705	0.64018	1
930	OG0004976	188.339	178.154	532.655	214.861	322.451	360.718	210.491	203.332	224.005	226.77	869.334	331.092	212.154	134.535	196.836	184.196	129.665	853.102	0.081881	-0.081881	1.2526	-1.2526	-0.16504	0.16504	0.0509713	-0.0509713	-0.0180761	0.0180761	1.32109	-1.32109	0.659662	-0.659662	0.0977358	-0.0977358	-2.1689	2.1689	0.644719	1
888	OG0004861	738.839	601.102	628.123	763.405	184.411	283.219	538.498	545.604	274.255	286.867	321.062	303.921	449.265	398.275	282.289	291.458	354.796	255.299	0.96507	-0.96507	-0.912726	0.912726	-1.98371	1.98371	-0.0615367	0.0615367	-0.211013	0.211013	0.25749	-0.25749	0.564824	-0.564824	-0.150026	0.150026	1.53111	-1.53111	0.647044	1
335	OG0003529	82.5935	70.0244	159.278	179.619	492.215	362.4	316.687	293.149	257.132	223.81	369.349	477.664	325.556	290.367	268.957	264.881	196.486	332.637	0.677415	-0.677415	-0.493709	0.493709	1.24943	-1.24943	0.317475	-0.317475	0.569887	-0.569887	-1.05185	1.05185	0.46993	-0.46993	0.062803	-0.062803	-2.1165	2.1165	0.647954	1
1072	OG0005300	260.169	427.319	1802.26	2138.72	548.688	561.591	353.254	347.882	331.517	350.808	320.597	399.459	300.868	309.891	312.895	307.249	521.046	378.578	-2.18994	2.18994	-0.768985	0.768985	-0.104678	0.104678	0.0690146	-0.0690146	-0.25466	0.25466	-0.98648	0.98648	-0.133062	0.133062	0.0820085	-0.0820085	1.42642	-1.42642	0.64954	1
1218	OG0005653	936.523	929.238	988.074	922.74	1529.71	1478.52	762.448	703.843	985.861	860.292	579.559	632.676	936.883	1249.23	553.241	531.337	1266.42	1093.86	0.0601829	-0.0601829	0.526972	-0.526972	0.262224	-0.262224	0.615998	-0.615998	1.04829	-1.04829	-0.675321	0.675321	-2.20205	2.20205	0.311262	-0.311262	1.12677	-1.12677	0.649933	1
125	OG0003026	60.3299	68.1924	228.396	177.921	301.274	248.649	295.264	332.533	230.467	246.303	148.11	261.315	290.564	255.225	193.063	226.059	233.078	213.428	-0.511182	0.511182	1.03803	-1.03803	0.799614	-0.799614	-0.49604	0.49604	-0.27755	0.27755	-2.31041	2.31041	0.541039	-0.541039	-0.657843	0.657843	0.367734	-0.367734	0.650993	1
391	OG0003657	469.905	421.826	604.458	437.904	299.22	321.808	553.399	501.779	166.462	220.545	223.553	248.666	329.083	258.079	230.344	232.407	60.4572	92.4579	0.467721	-0.467721	1.38613	-1.38613	-0.315524	0.315524	0.424387	-0.424387	-1.2123	1.2123	-0.461341	0.461341	1.04904	-1.04904	-0.0386803	0.0386803	-1.81542	1.81542	0.655703	1
458	OG0003838	763.503	994.575	100.915	134.737	1614.54	764.098	940.318	1070.51	1032.17	1207.25	497.225	474.382	427.021	342.193	551.448	537.119	423.2	1029.89	-0.63582	0.63582	-0.694324	0.694324	1.72958	-1.72958	-0.313201	0.313201	-0.378203	0.378203	0.113736	-0.113736	0.53348	-0.53348	0.0636759	-0.0636759	-2.01977	2.01977	0.658239	1
516	OG0003983	364.858	314.749	350.774	343.828	318.026	310.798	353.012	355.152	268.357	231.208	372.574	333.897	270.483	259.485	269.401	263.866	217.964	386.138	0.707782	-0.707782	0.0959908	-0.0959908	0.110329	-0.110329	-0.029021	0.029021	0.713843	-0.713843	0.525538	-0.525538	0.199213	-0.199213	0.0996312	-0.0996312	-2.67235	2.67235	0.659054	1
340	OG0003534	214.722	222.645	265.735	226.592	383.572	516.241	210.455	182.475	118.744	113.387	447.548	254.286	129.68	107.908	121.237	106.944	74.7681	473.943	-0.0654435	0.0654435	0.287209	-0.287209	-0.532615	0.532615	0.257238	-0.257238	0.0833664	-0.0833664	0.994743	-0.994743	0.331031	-0.331031	0.226271	-0.226271	-2.62795	2.62795	0.660807	1
991	OG0005113	329.507	323.006	1064.19	1162.22	174.885	205.53	339.804	396.353	225.133	184.433	406.151	374.17	602.824	582.148	331.314	279.089	464.566	584.434	0.134459	-0.134459	-0.594257	0.594257	-1.08722	1.08722	-1.03674	1.03674	1.34116	-1.34116	0.553135	-0.553135	0.2355	-0.2355	1.15472	-1.15472	-1.54221	1.54221	0.662114	1
634	OG0004269	145.929	149.515	278.845	233.252	216.207	239.749	114.933	103.202	236.362	229.429	182.598	186.383	159.249	150.153	192.397	180.652	156.703	192.493	-0.218137	0.218137	1.59999	-1.59999	-0.927911	0.927911	0.966464	-0.966464	0.267489	-0.267489	-0.18434	0.18434	0.528288	-0.528288	0.565831	-0.565831	-1.8419	1.8419	0.662213	1
1071	OG0005299	434.358	409.421	341.785	872.89	130.851	137.052	93.9909	97.7513	832.023	1116.97	149.489	214.954	141.891	143.057	253.201	236.972	204.449	62.224	0.118115	-0.118115	-1.74745	1.74745	-0.0925128	0.0925128	-0.0783793	0.0783793	-0.584302	0.584302	-0.717891	0.717891	-0.0163595	0.0163595	0.132322	-0.132322	2.13148	-2.13148	0.663115	1
408	OG0003706	296.224	311.622	666.584	522.359	441.142	459.653	423.648	519.753	320.853	360.871	412.126	462.683	234.401	253.535	522.224	541.841	304.665	246.57	-0.344614	0.344614	1.65027	-1.65027	-0.27955	0.27955	-1.38587	1.38587	-0.798584	0.798584	-0.786218	0.786218	-0.533505	0.533505	-0.250801	0.250801	1.43376	-1.43376	0.668574	1
537	OG0004044	171.398	126.196	417.241	471.993	167.818	177.95	54.8486	59.7811	59.7915	71.0498	53.3562	146.577	78.9501	281.489	114.95	83.4755	278.429	41.2888	0.413767	-0.413767	-0.167726	0.167726	-0.0798256	0.0798256	-0.117219	0.117219	-0.234397	0.234397	-1.27014	1.27014	-1.53074	1.53074	0.432103	-0.432103	2.02052	-2.02052	0.668607	1
789	OG0004619	494.791	501.692	260.366	406.518	1346.82	1223.93	319.347	443.31	582.945	701.889	200.882	381.724	336.495	356.431	499.723	588.304	1637.12	402.421	-0.0270864	0.0270864	-0.857164	0.857164	0.18697	-0.18697	-0.635734	0.635734	-0.362084	0.362084	-1.21405	1.21405	-0.11253	0.11253	-0.318431	0.318431	2.36777	-2.36777	0.672487	1
932	OG0004983	339.239	317.463	311.375	178.835	512.687	468.975	584.329	631.035	295.867	308.777	364.759	386.81	437.599	393.313	179.08	175.062	142.393	392.534	0.176325	-0.176325	1.4377	-1.4377	0.236777	-0.236777	-0.204352	0.204352	-0.113533	0.113533	-0.156013	0.156013	0.283412	-0.283412	0.0603311	-0.0603311	-2.48655	2.48655	0.672928	1
149	OG0003076	161.504	134.902	404.346	358.195	153.293	147.809	547.195	500.767	167.023	138.251	158.233	158.758	189.639	151.577	95.8636	87.535	98.6407	171.558	0.788127	-0.788127	0.531464	-0.531464	0.15992	-0.15992	0.389037	-0.389037	0.827634	-0.827634	-0.0145263	0.0145263	0.979546	-0.979546	0.398779	-0.398779	-2.36976	2.36976	0.675219	1
808	OG0004663	2241.83	3062.13	971.904	2413.28	750.374	780.979	684.849	585.029	1236.81	1340.18	563.92	634.544	771.028	530.684	923.671	1093.58	761.291	509.423	-0.826893	0.826893	-2.27652	2.27652	-0.106854	0.106854	0.420272	-0.420272	-0.214458	0.214458	-0.315067	0.315067	0.987179	-0.987179	-0.450342	0.450342	1.05975	-1.05975	0.676064	1
1037	OG0005219	453.678	418.3	691.31	622.834	770.342	1212.5	569.84	664.264	1022.21	861.979	1091.05	1185.73	1288.12	1186.32	707.9	643.937	1209.93	1139.81	0.435649	-0.435649	0.5595	-0.5595	-2.39439	2.39439	-0.821562	0.821562	0.913107	-0.913107	-0.446521	0.446521	0.44176	-0.44176	0.508058	-0.508058	0.320436	-0.320436	0.677499	1
690	OG0004403	84.0279	99.3474	293.769	281.054	32.1316	192.542	297.519	222.463	378.121	309.363	127.871	88.5084	86.0011	274.745	406.318	350.637	260.125	112.817	-0.241601	0.241601	0.0639723	-0.0639723	-2.06478	2.06478	0.417441	-0.417441	0.289238	-0.289238	0.526092	-0.526092	-1.51309	1.51309	0.212729	-0.212729	1.14229	-1.14229	0.677747	1
48	OG0002850	611.085	804.688	985.248	1525.82	289.227	202.055	676.547	684.355	873.573	1222.95	186.751	328.745	736.568	754.313	721.21	772.313	302.294	143.639	-0.696024	0.696024	-1.09573	1.09573	0.903138	-0.903138	-0.0291997	0.0291997	-0.848201	0.848201	-1.40201	1.40201	-0.0605792	0.0605792	-0.174155	0.174155	1.81089	-1.81089	0.679982	1
42	OG0002838	399.927	540.214	363.886	472.123	351.072	333.192	409.471	397.564	489.56	457.081	138.91	155.007	99.566	153.703	207.931	203.735	408.882	141.312	-0.761472	0.761472	-0.660687	0.660687	0.133348	-0.133348	0.0752921	-0.0752921	0.175086	-0.175086	-0.279473	0.279473	-1.0908	1.0908	0.0520165	-0.0520165	2.48171	-2.48171	0.681349	1
40	OG0002836	223.537	203.584	281.702	161.243	4381.18	4284.28	214.4	279.012	690.272	676.453	899.227	1145.46	1579.22	1460.36	867.321	920.103	924.359	830.434	0.40466	-0.40466	2.35568	-2.35568	0.0968628	-0.0968628	-1.13431	1.13431	0.0875795	-0.0875795	-1.04314	1.04314	0.338744	-0.338744	-0.25579	0.25579	0.46364	-0.46364	0.681423	1
1087	OG0005337	89.8183	124.633	103.273	140.571	610.716	458.724	270.192	299.178	858.131	849.306	178.541	260.402	397.445	383.729	873.67	845.381	637.187	305.88	-0.984047	0.984047	-0.927143	0.927143	0.861473	-0.861473	-0.308589	0.308589	0.0313316	-0.0313316	-1.13044	1.13044	0.106428	-0.106428	0.0997505	-0.0997505	2.12945	-2.12945	0.68213	1
203	OG0003195	111.327	66.6452	692.746	452.358	226.466	218.396	92.7835	82.805	196.22	205.748	205.146	172.797	126.967	187.07	187.293	143.604	147.961	208.77	1.62994	-1.62994	1.36288	-1.36288	0.117772	-0.117772	0.368948	-0.368948	-0.153894	0.153894	0.555667	-0.555667	-1.24254	1.24254	0.857185	-0.857185	-1.10667	1.10667	0.682184	1
982	OG0005094	102.671	79.6923	231.456	157.896	125.241	144.11	117.302	100.514	272.29	317.652	141.215	163.904	114.216	80.5787	189.288	196.631	50.1158	101.768	0.783774	-0.783774	1.17516	-1.17516	-0.435757	0.435757	0.479405	-0.479405	-0.478279	0.478279	-0.462551	0.462551	1.07409	-1.07409	-0.118344	0.118344	-2.11532	2.11532	0.682369	1
454	OG0003822	181.205	195.575	245.005	193.202	286.417	276.803	110.825	128.146	167.023	178.809	202.386	174.207	166.576	162.226	100.526	103.77	187.736	268.081	-0.456883	0.456883	1.41613	-1.41613	0.204488	-0.204488	-0.86828	0.86828	-0.40824	0.40824	0.89636	-0.89636	0.158499	-0.158499	-0.190243	0.190243	-2.11156	2.11156	0.682748	1
797	OG0004641	610.306	652.786	76.7365	121.894	277.95	244.907	304.828	280.027	404.179	505.206	262.182	298.301	307.377	487.377	508.823	533.57	610.14	271.576	-0.187184	0.187184	-1.26531	1.26531	0.351731	-0.351731	0.236007	-0.236007	-0.6183	0.6183	-0.358671	0.358671	-1.26053	1.26053	-0.132129	0.132129	2.1371	-2.1371	0.68346	1
718	OG0004461	335.132	257.365	618.134	597.978	492.565	590.095	899.808	985.986	857.009	672.901	617.267	706.672	1151.93	974.055	673.726	703.811	715.145	623.984	1.5773	-1.5773	0.199178	-0.199178	-1.08255	1.08255	-0.549173	0.549173	1.44615	-1.44615	-0.811516	0.811516	1.00544	-1.00544	-0.262462	0.262462	0.818071	-0.818071	0.684978	1
1105	OG0005385	790.058	821.089	438.062	698.146	1862.61	1783.89	1156.73	1164.52	1612.62	2020.79	432.374	718.374	2866.25	1490.88	1439.93	1505.77	1348.35	459.998	-0.0819858	0.0819858	-0.974385	0.974385	0.0918976	-0.0918976	-0.0142813	0.0142813	-0.4782	0.4782	-1.05794	1.05794	1.34367	-1.34367	-0.0951395	0.0951395	2.09112	-2.09112	0.685072	1
1116	OG0005407	245.595	214.019	233.391	311.222	1404.11	1236.25	730.267	695.562	1029.65	1059.83	286.095	452.84	479.379	446.555	770.696	776.118	610.148	249.477	0.394169	-0.394169	-0.819941	0.819941	0.364756	-0.364756	0.139653	-0.139653	-0.0828644	0.0828644	-1.29469	1.29469	0.20339	-0.20339	-0.020111	0.020111	2.40726	-2.40726	0.685514	1
1155	OG0005503	738.811	849.758	535.019	551.135	1091.99	1096.93	169.942	152.684	1273.96	1411.16	1970.5	2818.69	201.02	156.898	353.507	364.34	1205.17	850.183	-0.68956	0.68956	-0.146499	0.146499	-0.0223034	0.0223034	0.528139	-0.528139	-0.504495	0.504495	-1.74862	1.74862	1.21713	-1.21713	-0.149	0.149	1.70524	-1.70524	0.685675	1
70	OG0002912	147.248	105.373	321.616	326.632	231.68	243.808	174.775	132.791	126.317	121.081	165.593	160.158	125.342	55.3792	151.568	122.035	65.2301	169.802	0.7575	-0.7575	-0.035366	0.035366	-0.11656	0.11656	0.623794	-0.623794	0.0967266	-0.0967266	0.0762436	-0.0762436	1.76911	-1.76911	0.493259	-0.493259	-2.03322	2.03322	0.685744	1
440	OG0003782	395.69	268.26	515.546	413.593	258.775	506.554	275.693	320.717	204.358	160.158	340.376	302.516	305.48	241.026	166.656	152.738	378.661	327.403	1.25548	-1.25548	0.717782	-0.717782	-2.11782	2.11782	-0.493826	0.493826	0.79319	-0.79319	0.385227	-0.385227	0.77149	-0.77149	0.285049	-0.285049	0.474891	-0.474891	0.686065	1
630	OG0004260	230.119	236.728	164.21	153.891	264.236	276.132	225.111	256.495	212.218	187.092	212.505	208.861	158.166	136.309	359.497	361.547	211.6	284.957	-0.213525	0.213525	0.489298	-0.489298	-0.332046	0.332046	-0.982944	0.982944	0.949118	-0.949118	0.130444	-0.130444	1.11956	-1.11956	-0.042892	0.042892	-2.22833	2.22833	0.687349	1
223	OG0003239	742.768	644.481	400.288	330.554	217.369	177.071	562.425	466.031	363.524	390.185	180.004	275.678	387.415	408.58	361.714	346.836	162.288	148.285	0.721961	-0.721961	0.972284	-0.972284	1.04107	-1.04107	0.955061	-0.955061	-0.360448	0.360448	-2.13946	2.13946	-0.270951	0.270951	0.213953	-0.213953	0.459434	-0.459434	0.687772	1
199	OG0003186	141.427	165.705	403.848	283.972	229.365	261.054	294.901	278.256	281.267	252.813	376.253	405.083	317.686	214.403	352.833	320.701	207.615	365.784	-0.572802	0.572802	1.26288	-1.26288	-0.468215	0.468215	0.210434	-0.210434	0.386049	-0.386049	-0.267362	0.267362	1.40652	-1.40652	0.345682	-0.345682	-1.9988	1.9988	0.689199	1
461	OG0003848	1227.9	1306.36	667.085	807.853	272.022	469.811	971.006	976.293	1214.91	1241.89	418.575	412.576	787.846	649.954	1014.14	996.096	976.066	706.859	-0.264789	0.264789	-0.816271	0.816271	-2.28034	2.28034	-0.0232181	0.0232181	-0.0939197	0.0939197	0.0617366	-0.0617366	0.820244	-0.820244	0.0767595	-0.0767595	1.36812	-1.36812	0.690545	1
639	OG0004279	208.604	237.142	338.662	295.769	270.967	256.305	148.115	191.057	161.412	151.869	165.584	143.304	204.015	204.819	110.734	94.1291	202.85	242.505	-0.869291	0.869291	0.917991	-0.917991	0.37757	-0.37757	-1.71908	1.71908	0.413598	-0.413598	0.979368	-0.979368	-0.0266946	0.0266946	1.10054	-1.10054	-1.20901	1.20901	0.696032	1
683	OG0004382	215.467	258.302	237.138	215.011	286.599	297.164	59.3589	60.286	94.8804	122.558	98.4331	96.0059	99.2947	101.522	89.8742	70.5334	107.383	99.4479	-1.2646	1.2646	0.684481	-0.684481	-0.253145	0.253145	-0.108386	0.108386	-1.7804	1.7804	0.174602	-0.174602	-0.155141	0.155141	1.68645	-1.68645	0.536623	-0.536623	0.696934	1
1043	OG0005231	205.798	237.619	159.464	134.257	219.414	262.566	154.237	180.655	1113.58	1222.06	136.61	180.763	142.16	335.09	218.583	191.047	318.991	129.1	-0.332571	0.332571	0.397698	-0.397698	-0.414903	0.414903	-0.365579	0.365579	-0.215229	0.215229	-0.644707	0.644707	-1.8734	1.8734	0.311523	-0.311523	1.96387	-1.96387	0.705286	1
945	OG0005005	611.082	603.96	314.036	311.482	537.705	465.656	289.465	322.231	294.747	259.628	246.087	262.711	288.657	340.415	343.763	335.049	321.386	284.369	0.110712	-0.110712	0.0771204	-0.0771204	1.35632	-1.35632	-1.01178	1.01178	1.19653	-1.19653	-0.617108	0.617108	-1.55403	1.55403	0.242477	-0.242477	1.1542	-1.1542	0.705926	1
1113	OG0005404	92.7836	80.2323	643.108	394.066	358.582	386.99	449.5	512.682	189.483	169.039	304.503	277.701	207.271	210.499	134.478	112.397	233.874	365.208	0.586207	-0.586207	1.94031	-1.94031	-0.30789	0.30789	-0.530621	0.530621	0.460776	-0.460776	0.372001	-0.372001	-0.0624331	0.0624331	0.722776	-0.722776	-1.7715	1.7715	0.707178	1
1137	OG0005464	211.881	147.374	139.361	187.761	199.936	225.051	192.091	165.41	74.3885	83.1875	114.532	105.835	242.548	171.441	101.857	74.0854	90.6858	108.747	1.4492	-1.4492	-1.19415	1.19415	-0.476957	0.476957	0.602349	-0.602349	-0.45068	0.45068	0.318509	-0.318509	1.38626	-1.38626	1.27397	-1.27397	-0.730912	0.730912	0.707559	1
1162	OG0005522	320.783	314.772	462.186	534.373	247.779	351.784	330.783	464.617	533.354	549.452	250.222	437.395	534.178	438.391	649.983	761.659	858.333	286.114	0.0433813	-0.0433813	-0.332253	0.332253	-0.795672	0.795672	-0.771779	0.771779	-0.068191	0.068191	-1.24856	1.24856	0.451753	-0.451753	-0.362867	0.362867	2.2934	-2.2934	0.709291	1
285	OG0003373	722.051	815.573	1172.33	950.121	97.053	140.163	774.241	822.295	570.967	668.46	410.291	307.204	431.633	538.848	284.712	267.418	322.173	298.908	-0.591044	0.591044	1.01737	-1.01737	-1.76601	1.76601	-0.292487	0.292487	-0.764384	0.764384	1.39619	-1.39619	-1.07355	1.07355	0.304386	-0.304386	0.364016	-0.364016	0.710133	1
175	OG0003137	386.653	353.284	530.469	508.735	273.772	241.315	305.172	270.934	286.045	296.038	246.078	302.521	219.208	152.642	242.549	248.897	149.552	274.483	0.351558	-0.351558	0.163039	-0.163039	0.491229	-0.491229	0.463288	-0.463288	-0.133834	0.133834	-0.802046	0.802046	1.39551	-1.39551	-0.100684	0.100684	-2.29676	2.29676	0.711959	1
1095	OG0005353	1359.23	1119.14	362.888	367.468	1315.59	1448	296.472	321.831	1665.46	1881.64	983.871	1226	252.577	312.734	1518.32	1427.92	848.787	291.342	0.533324	-0.533324	-0.0345265	0.0345265	-0.263774	0.263774	-0.225798	0.225798	-0.335528	0.335528	-0.603213	0.603213	-0.585849	0.585849	0.168924	-0.168924	2.69177	-2.69177	0.712075	1
924	OG0004964	64.2837	69.9294	189.124	195.336	247.47	235.443	175.661	160.561	151.865	134.702	149.489	128.318	110.147	97.9724	167.987	123.055	105.005	195.395	-0.337734	0.337734	-0.129721	0.129721	0.19997	-0.19997	0.360576	-0.360576	0.480871	-0.480871	0.61186	-0.61186	0.469659	-0.469659	1.23951	-1.23951	-2.41589	2.41589	0.713269	1
1215	OG0005645	691.979	762.073	1184.82	1021.92	1579.54	1631.35	1213.36	1176.74	774.482	887.827	803.563	882.738	962.013	781.653	1230.94	1191.21	575.139	614.68	-0.852248	0.852248	1.30507	-1.30507	-0.28531	0.28531	0.270845	-0.270845	-1.20547	1.20547	-0.830075	0.830075	1.82872	-1.82872	0.290019	-0.290019	-0.587536	0.587536	0.713335	1
177	OG0003140	312.831	350.771	718.472	471.598	485.578	451.409	367.83	373.227	222.882	218.179	334.856	409.766	274.55	259.843	298.915	332.37	280.8	431.497	-0.511378	0.511378	1.85549	-1.85549	0.326178	-0.326178	-0.0651393	0.0651393	0.0953694	-0.0953694	-0.899821	0.899821	0.246152	-0.246152	-0.474011	0.474011	-1.89235	1.89235	0.713778	1
908	OG0004923	315.242	297.082	169.581	278.311	238.513	299.157	261.035	300.015	279.869	254.598	134.766	194.344	145.144	151.928	145.13	163.901	318.991	112.817	0.147301	-0.147301	-1.20576	1.20576	-0.56021	0.56021	-0.345085	0.345085	0.234846	-0.234846	-0.899138	0.899138	-0.11343	0.11343	-0.301697	0.301697	2.37151	-2.37151	0.71406	1
139	OG0003056	531.647	340.581	625.876	324.108	616.359	775.214	362.354	323.747	326.464	308.774	695.471	384.005	362.179	293.562	222.579	195.618	232.283	789.151	0.852331	-0.852331	1.23598	-1.23598	-0.444173	0.444173	0.218945	-0.218945	0.108359	-0.108359	1.12267	-1.12267	0.407148	-0.407148	0.250847	-0.250847	-2.12128	2.12128	0.716052	1
249	OG0003287	194.03	175.029	157.966	130.276	304.359	316.038	154.398	137.941	261.342	238.612	387.753	373.234	297.881	231.446	320.884	313.343	295.93	493.715	0.483281	-0.483281	0.901755	-0.901755	-0.176714	0.176714	0.528423	-0.528423	0.426776	-0.426776	0.179094	-0.179094	1.17816	-1.17816	0.111608	-0.111608	-2.35119	2.35119	0.717717	1
154	OG0003083	130.862	135.99	229.232	195.556	422.019	476.529	148.597	181.869	480.861	569.287	243.327	191.539	298.969	305.947	288.261	245.852	268.08	318.098	-0.23788	0.23788	0.981429	-0.981429	-0.751002	0.751002	-1.24641	1.24641	-1.0424	1.0424	1.47431	-1.47431	-0.142804	0.142804	0.982954	-0.982954	-1.05635	1.05635	0.719782	1
1110	OG0005395	263.789	253.735	303.073	465.113	928.807	614.558	181.862	170.053	364.082	381.005	323.822	316.101	355.942	365.267	444.511	431.872	464.558	406.491	0.185801	-0.185801	-2.0173	2.0173	1.94724	-1.94724	0.320917	-0.320917	-0.217202	0.217202	0.115379	-0.115379	-0.123653	0.123653	0.137918	-0.137918	0.637528	-0.637528	0.71995	1
1115	OG0005406	1416.92	1577.83	123.002	282.098	491.296	185.99	426.882	435.043	926.906	1040.29	343.136	386.346	227.618	233.217	964.905	974.759	428.769	248.314	-0.236571	0.236571	-1.7292	1.7292	1.98477	-1.98477	-0.0416875	0.0416875	-0.253779	0.253779	-0.260808	0.260808	-0.0534925	0.0534925	-0.0223685	0.0223685	1.17347	-1.17347	0.720926	1
163	OG0003109	420.077	399.309	117.009	92.2038	463.383	346.772	207.796	178.132	190.036	215.518	390.057	303.453	278.079	188.132	282.047	265.644	89.0948	248.314	0.13029	-0.13029	0.609476	-0.609476	0.739907	-0.739907	0.395122	-0.395122	-0.32299	0.32299	0.641939	-0.641939	0.991774	-0.991774	0.153954	-0.153954	-2.42575	2.42575	0.726084	1
1070	OG0005292	657.334	718.185	543.083	596.628	849.574	723.55	795.506	758.271	864.933	919.012	482.046	659.832	382.531	615.526	1322.59	1186.64	1084.24	405.916	-0.235102	0.235102	-0.249677	0.249677	0.425741	-0.425741	0.127354	-0.127354	-0.1611	0.1611	-0.827432	0.827432	-1.24063	1.24063	0.287939	-0.287939	2.41914	-2.41914	0.726196	1
393	OG0003663	94.9881	76.1945	365.51	252.886	204.169	189.616	987.756	960.738	427.526	443.173	402.159	386.412	523.603	473.533	513.723	537.119	198.077	290.766	1.0885	-1.0885	1.80567	-1.80567	0.366417	-0.366417	0.137477	-0.137477	-0.178174	0.178174	0.197987	-0.197987	0.49785	-0.49785	-0.220743	0.220743	-1.87991	1.87991	0.726424	1
156	OG0003091	85.746	118.393	79.6336	110.308	323.356	343.73	192.658	174.193	329.235	402.32	274.141	258.505	220.019	303.146	303.178	323.289	512.295	277.397	-1.09679	1.09679	-1.10754	1.10754	-0.209455	0.209455	0.345185	-0.345185	-0.685144	0.685144	0.201312	-0.201312	-1.0897	1.0897	-0.220163	0.220163	2.03998	-2.03998	0.726475	1
75	OG0002919	345.107	341.713	1132.24	712.082	1313.56	1262.57	957.617	1012.95	962.842	858.228	1514.68	1331.37	1152.2	888.499	510.616	434.618	549.675	1332.29	0.0284395	-0.0284395	1.31106	-1.31106	0.113914	-0.113914	-0.161592	0.161592	0.330602	-0.330602	0.37066	-0.37066	0.743656	-0.743656	0.46271	-0.46271	-2.3932	2.3932	0.728232	1
1171	OG0005537	1038.39	990.716	414.085	445.914	392.035	388.297	369.039	337.782	741.917	793.372	689.487	652.354	223.549	240.316	310.01	304.971	201.259	201.21	0.809381	-0.809381	-1.2749	1.2749	0.164982	-0.164982	1.52335	-1.52335	-1.15448	1.15448	0.953262	-0.953262	-1.24518	1.24518	0.282294	-0.282294	0.00415815	-0.00415815	0.728493	1
786	OG0004612	121.72	139.918	448.551	369.471	181.275	229.493	386.518	406.249	357.907	333.925	449.844	352.624	188.551	144.119	213.033	226.823	99.4362	192.487	-0.499394	0.499394	0.694099	-0.694099	-0.842818	0.842818	-0.178704	0.178704	0.248883	-0.248883	0.869849	-0.869849	0.958969	-0.958969	-0.225103	0.225103	-2.2886	2.2886	0.729232	1
413	OG0003718	561.881	523.766	518.873	307.522	353.896	274.586	355.429	426.749	261.906	296.337	228.149	381.195	305.752	406.447	286.264	339.73	450.255	190.394	0.173116	-0.173116	1.26111	-1.26111	0.622256	-0.622256	-0.449615	0.449615	-0.304127	0.304127	-1.2385	1.2385	-0.697177	0.697177	-0.421157	0.421157	2.00012	-2.00012	0.729435	1
935	OG0004988	279.386	254.057	237.576	216.667	803.818	847.809	307.426	288.91	318.046	276.795	446.164	359.18	391.753	391.179	296.476	294.058	100.232	197.721	0.384535	-0.384535	0.372785	-0.372785	-0.215706	0.215706	0.251466	-0.251466	0.561618	-0.561618	0.874719	-0.874719	0.00592916	-0.00592916	0.0331576	-0.0331576	-2.64985	2.64985	0.729988	1
616	OG0004235	473.547	407.157	395.167	309.959	128.102	148.446	254.27	219.129	262.187	219.955	145.354	140.021	256.647	298.18	109.624	103.263	108.982	138.986	0.894505	-0.894505	1.43393	-1.43393	-0.872936	0.872936	0.88083	-0.88083	1.03938	-1.03938	0.221758	-0.221758	-0.888286	0.888286	0.354581	-0.354581	-1.43582	1.43582	0.730672	1
11	OG0002775	508.57	498.261	907.718	1381.54	361.537	360.971	222.213	196.611	750.818	722.352	662.813	652.808	219.753	209.079	667.51	609.429	311.036	318.098	0.133597	-0.133597	-2.70062	2.70062	0.0102265	-0.0102265	0.797577	-0.797577	0.252132	-0.252132	0.0992304	-0.0992304	0.32479	-0.32479	0.593483	-0.593483	-0.146461	0.146461	0.730725	1
1123	OG0005425	492.957	462.772	433.504	410.697	623.556	741.972	967.219	1098.68	951.328	756.384	1165.1	1203.06	929.737	954.521	802.212	773.071	1218.69	1069.05	0.519824	-0.519824	0.444643	-0.444643	-1.42727	1.42727	-1.04733	1.04733	1.87884	-1.87884	-0.263826	0.263826	-0.21648	0.21648	0.304469	-0.304469	1.07652	-1.07652	0.733655	1
759	OG0004555	442.777	455.594	91.8795	81.2773	278.86	289.202	324.984	315.064	174.322	187.69	373.204	366.518	272.653	308.12	574.911	531.335	279.209	301.234	-0.369244	0.369244	1.58464	-1.58464	-0.471189	0.471189	0.401129	-0.401129	-0.955711	0.955711	0.233905	-0.233905	-1.58046	1.58046	1.01946	-1.01946	-0.982045	0.982045	0.735485	1
803	OG0004655	352.048	410.413	102.523	97.8197	346.876	304.883	112.676	136.225	256.298	198.347	295.299	229.462	299.778	347.166	102.523	86.8778	276.035	600.136	-0.498383	0.498383	0.152837	-0.152837	0.419489	-0.419489	-0.615988	0.615988	0.829878	-0.829878	0.816852	-0.816852	-0.476914	0.476914	0.537813	-0.537813	-2.40836	2.40836	0.735769	1
837	OG0004743	594.699	577.847	918.582	999.793	263.676	302.895	1054.53	985.379	736.306	810.563	271.381	332.955	299.786	438.036	298.695	286.952	583.094	315.772	0.1102	-0.1102	-0.324587	0.324587	-0.530748	0.530748	0.259905	-0.259905	-0.368076	0.368076	-0.781221	0.781221	-1.4367	1.4367	0.153749	-0.153749	2.28029	-2.28029	0.738339	1
10	OG0002772	576.115	498.98	630.247	503.598	207.707	346.374	855.187	803.915	562.551	502.387	573.58	594.271	885.261	708.873	683.936	658.652	569.578	550.124	0.669508	-0.669508	1.04231	-1.04231	-2.33532	2.33532	0.288375	-0.288375	0.527178	-0.527178	-0.165327	0.165327	1.03251	-1.03251	0.175728	-0.175728	0.16213	-0.16213	0.738462	1
345	OG0003555	802.549	828.072	1218.96	1364.12	1272.59	1196.48	501.048	495.316	654.619	622.87	640.275	849.493	704.555	773.13	1082.48	1209.47	1299.83	914.158	-0.185844	0.185844	-0.667236	0.667236	0.366	-0.366	0.0683057	-0.0683057	0.295078	-0.295078	-1.66744	1.66744	-0.550998	0.550998	-0.657836	0.657836	2.0683	-2.0683	0.738531	1
652	OG0004302	444.953	439.034	756.245	434.423	101.483	142.594	493.476	562.974	389.06	280.644	807.239	715.551	534.997	438.749	436.502	388.695	483.658	881.022	0.0403987	-0.0403987	1.63062	-1.63062	-1.01616	1.01616	-0.396869	0.396869	0.976651	-0.976651	0.363245	-0.363245	0.596312	-0.596312	0.349515	-0.349515	-1.75665	1.75665	0.738739	1
1130	OG0005448	200.768	169.696	687.877	486.097	115.219	183.579	272.391	265.784	197.337	215.515	186.747	225.72	296.804	239.606	177.753	142.84	194.895	174.466	0.688282	-0.688282	1.41045	-1.41045	-1.87742	1.87742	0.100742	-0.100742	-0.36131	0.36131	-0.775377	0.775377	0.875026	-0.875026	0.893658	-0.893658	0.453881	-0.453881	0.740823	1
970	OG0005061	468.321	479.338	582.223	475.78	1833.89	1792.14	613.241	757.664	781.652	642.577	733.653	739.902	840.741	834.366	837.27	854.268	727.698	800.764	-0.185339	0.185339	1.60396	-1.60396	0.183567	-0.183567	-1.67955	1.67955	1.55679	-1.55679	-0.0676113	0.0676113	0.060673	-0.060673	-0.16021	0.16021	-0.762129	0.762129	0.742043	1
99	OG0002967	222.601	217.895	206.481	179.862	263.961	254.672	276.58	261.24	590.268	579.592	262.182	244.447	246.34	207.655	166.21	154.006	147.166	329.729	0.0772523	-0.0772523	0.498218	-0.498218	0.129513	-0.129513	0.206255	-0.206255	0.065992	-0.065992	0.253117	-0.253117	0.616148	-0.616148	0.275565	-0.275565	-2.76812	2.76812	0.746593	1
3	OG0002761	229.496	175.9	138.362	121.851	42.0222	137.981	187.018	161.369	214.744	227.652	146.27	110.05	68.6381	89.0981	178.195	147.917	238.647	169.226	0.620117	-0.620117	0.297625	-0.297625	-2.50049	2.50049	0.345326	-0.345326	-0.136861	0.136861	0.662799	-0.662799	-0.608406	0.608406	0.43549	-0.43549	0.798337	-0.798337	0.746882	1
613	OG0004224	692.587	500.37	80.7949	82.8445	172.677	165.619	1592.74	1544.62	864.313	857.038	2401.03	1714.91	792.458	1091.89	845.956	802.109	1273.58	1646.92	1.50912	-1.50912	-0.11731	0.11731	0.195417	-0.195417	0.143658	-0.143658	0.0395806	-0.0395806	1.5613	-1.5613	-1.48833	1.48833	0.249182	-0.249182	-1.1973	1.1973	0.748691	1
667	OG0004338	145.633	143.192	375.938	214.182	216.818	207.28	278.352	275.377	213.338	211.669	367.519	377.931	241.188	285.756	158.223	155.531	176.599	344.273	0.0570205	-0.0570205	1.84899	-1.84899	0.151716	-0.151716	0.0362445	-0.0362445	0.0264818	-0.0264818	-0.0942188	0.0942188	-0.570523	0.570523	0.0578707	-0.0578707	-2.17146	2.17146	0.74949	1
1013	OG0005165	802.299	860.803	456.169	409.913	139.519	82.9382	620.893	600.538	566.475	598.296	474.682	503.421	395.366	726.824	473.559	527.224	583.889	399.513	-0.231693	0.231693	0.351776	-0.351776	1.67522	-1.67522	0.109761	-0.109761	-0.179935	0.179935	-0.193524	0.193524	-1.94542	1.94542	-0.353186	0.353186	1.23488	-1.23488	0.753994	1
137	OG0003053	856.253	959.984	1130	1039.15	674.115	633.433	213.111	189.342	364.082	410.905	338.996	354.507	245.252	188.849	635.998	632.771	315.809	411.149	-0.762317	0.762317	0.559018	-0.559018	0.415289	-0.415289	0.788328	-0.788328	-0.806408	0.806408	-0.29852	0.29852	1.73425	-1.73425	0.0339555	-0.0339555	-1.7505	1.7505	0.754689	1
665	OG0004334	80.6041	69.4683	233.642	269.43	432.787	455.2	390.464	368.381	328.154	334.526	315.998	329.682	513.291	458.624	272.51	253.21	311.036	291.929	1.60767	-1.60767	-1.54129	1.54129	-0.546843	0.546843	0.630492	-0.630492	-0.208326	0.208326	-0.459178	0.459178	1.21862	-1.21862	0.795379	-0.795379	0.686556	-0.686556	0.758095	1
809	OG0004664	131.658	193.008	579.717	673.536	491.09	296.454	241.221	243.77	815.901	744.276	810.458	943.153	417.252	576.113	862.128	844.878	867.092	723.426	-1.45137	1.45137	-0.574972	0.574972	1.8982	-1.8982	-0.0403615	0.0403615	0.352602	-0.352602	-0.581185	0.581185	-1.2283	1.2283	0.0776164	-0.0776164	0.693756	-0.693756	0.758433	1
753	OG0004542	915.064	617.141	694.12	611.081	336.43	368.028	337.307	402.414	373.627	329.491	316.467	314.692	363.269	469.628	449.588	450.097	532.175	358.224	1.70896	-1.70896	0.559172	-0.559172	-0.394233	0.394233	-0.773577	0.773577	0.551708	-0.551708	0.0247185	-0.0247185	-1.12234	1.12234	-0.00496802	0.00496802	1.71706	-1.71706	0.758645	1
1168	OG0005530	97.2457	58.1998	186.439	115.801	166.861	169.857	260.148	259.421	131.654	124.044	144.89	149.855	167.122	135.599	110.956	96.1614	74.776	144.22	1.50918	-1.50918	1.40422	-1.40422	-0.0534585	0.0534585	0.00841181	-0.00841181	0.178802	-0.178802	-0.101222	0.101222	0.62563	-0.62563	0.429166	-0.429166	-1.90521	1.90521	0.759619	1
1102	OG0005374	585.386	563.938	350.524	224.153	936.868	993.455	610.102	796.24	501.637	438.141	908.891	915.987	641.433	582.868	449.593	402.395	950.618	1291	0.171978	-0.171978	2.02659	-2.02659	-0.27017	0.27017	-1.21981	1.21981	0.622683	-0.622683	-0.0358343	0.0358343	0.440851	-0.440851	0.510538	-0.510538	-1.39943	1.39943	0.762588	1
8	OG0002770	864.295	638.082	446.242	430.287	259.695	431.101	392.478	415.741	321.1	259.501	918.555	654.213	476.94	428.807	455.362	401.381	641.96	715.291	1.19646	-1.19646	0.144643	-0.144643	-1.97167	1.97167	-0.228724	0.228724	0.843059	-0.843059	1.33555	-1.33555	0.422278	-0.422278	0.500675	-0.500675	-0.429324	0.429324	0.76278	1
288	OG0003390	238.136	145.797	309.066	384.141	229.757	158.59	289.787	369.391	494.897	422.746	701.911	582.563	541.232	737.278	533.031	572.147	530.591	540.936	1.76733	-1.76733	-0.795829	0.795829	1.34663	-1.34663	-0.887399	0.887399	0.577769	-0.577769	0.682775	-0.682775	-1.12679	1.12679	-0.260083	0.260083	-0.0709392	0.0709392	0.76441	1
25	OG0002803	117.083	170.971	317.058	169.782	209.411	246.788	322.971	419.782	251.231	183.249	539.082	480.469	427.567	447.975	166.658	156.29	532.182	820.542	-1.14979	1.14979	1.8593	-1.8593	-0.503558	0.503558	-0.801089	0.801089	0.961666	-0.961666	0.353333	-0.353333	-0.143264	0.143264	0.197317	-0.197317	-1.31017	1.31017	0.765644	1
277	OG0003358	351.103	419.833	75.2767	119.848	640.999	729.49	619.604	714.547	648.996	720.857	229.524	378.849	794.629	707.105	992.209	1022.12	980.067	342.482	-0.42824	0.42824	-1.09724	1.09724	-0.310158	0.310158	-0.341837	0.341837	-0.251987	0.251987	-1.17902	1.17902	0.279958	-0.279958	-0.0713233	0.0713233	2.31572	-2.31572	0.767208	1
295	OG0003408	78.992	63.1403	762.176	752.434	85.9302	141.656	184.922	178.132	78.3184	81.7073	107.172	135.338	124.523	84.8348	108.515	101.233	147.961	94.2083	0.781459	-0.781459	0.0450658	-0.0450658	-1.71566	1.71566	0.131051	-0.131051	-0.148383	0.148383	-0.813793	0.813793	1.32828	-1.32828	0.243249	-0.243249	1.55527	-1.55527	0.772089	1
916	OG0004941	654.29	523.079	377.561	314.009	1623.55	1635.8	396.022	411.398	464.894	449.195	919.806	874.88	576.59	703.225	470.009	433.603	447.853	536.749	1.59056	-1.59056	1.31156	-1.31156	-0.0536596	0.0536596	-0.271792	0.271792	0.245128	-0.245128	0.357279	-0.357279	-1.41221	1.41221	0.575019	-0.575019	-1.28859	1.28859	0.774747	1
1061	OG0005275	1725.03	2519.69	690.498	728.23	571.205	532.524	1533.43	1982.37	1530.44	1867.13	250.227	501.548	431.357	473.182	534.361	568.075	594.223	201.798	-0.841223	0.841223	-0.119506	0.119506	0.157474	-0.157474	-0.573788	0.573788	-0.445286	0.445286	-1.50218	1.50218	-0.207774	0.207774	-0.137419	0.137419	2.21521	-2.21521	0.774936	1
24	OG0002801	354.134	370.574	296.455	288.063	419.378	429.521	499.033	458.153	472.726	512.737	398.792	489.372	559.417	534.592	680.148	669.555	500.355	462.894	-0.509857	0.509857	0.322675	-0.322675	-0.268569	0.268569	0.959921	-0.959921	-0.912548	0.912548	-2.29223	2.29223	0.510021	-0.510021	0.176402	-0.176402	0.874095	-0.874095	0.775079	1
198	OG0003185	171.648	180.005	184.129	114.387	192.598	175.243	228.644	204.891	180.5	184.735	230.904	184.041	203.473	493.007	175.532	166.182	167.848	233.195	-0.132521	0.132521	1.30273	-1.30273	0.263088	-0.263088	0.305508	-0.305508	-0.0646604	0.0646604	0.629741	-0.629741	-2.31803	2.31803	0.152569	-0.152569	-0.908568	0.908568	0.775701	1
886	OG0004857	307.138	303.959	255.433	264.945	107.21	194.55	259.826	242.053	167.801	193.483	168.813	170.456	229.249	209.647	206.154	198.655	278.421	183.764	0.0413121	-0.0413121	-0.145176	0.145176	-2.2988	2.2988	0.281263	-0.281263	-0.5646	0.5646	-0.0384681	0.0384681	0.354721	-0.354721	0.147113	-0.147113	1.62662	-1.62662	0.776006	1
395	OG0003670	366.186	323.434	705.982	828.36	263.135	243.589	186.211	175.504	232.143	236.241	210.205	198.488	187.195	156.195	314.451	288.986	190.917	234.945	0.97896	-0.97896	-1.25951	1.25951	0.609111	-0.609111	0.467416	-0.467416	-0.138165	0.138165	0.452728	-0.452728	1.42559	-1.42559	0.666382	-0.666382	-1.63259	1.63259	0.779441	1
448	OG0003804	57.7543	67.0167	135.178	121.939	213.224	241.3	254.752	280.528	175.164	134.397	254.362	251.476	182.583	173.581	195.726	194.094	175	240.173	-0.906763	0.906763	0.628942	-0.628942	-0.754492	0.754492	-0.588191	0.588191	1.6086	-1.6086	0.0696861	-0.0696861	0.308703	-0.308703	0.0511471	-0.0511471	-1.91745	1.91745	0.780605	1
791	OG0004623	108.833	108.676	303.199	276.264	503.333	513.417	128.382	135.113	442.401	442.581	489.406	428.961	297.613	377.691	320.664	301.667	397.745	414.633	0.0139621	-0.0139621	0.900078	-0.900078	-0.192039	0.192039	-0.494683	0.494683	-0.00394299	0.00394299	1.27446	-1.27446	-2.29616	2.29616	0.591093	-0.591093	-0.402539	0.402539	0.780695	1
126	OG0003028	543.546	492.832	174.44	150.71	453.731	629.029	279.549	232.142	204.916	174.365	223.084	224.788	541.511	410.707	120.718	102.248	86.7084	204.118	0.292604	-0.292604	0.436387	-0.436387	-0.968076	0.968076	0.553992	-0.553992	0.481651	-0.481651	-0.0227449	0.0227449	0.821396	-0.821396	0.495319	-0.495319	-2.41399	2.41399	0.782258	1
668	OG0004339	1588.42	1550.73	1264.11	1193.17	2467.75	2477.99	1422.84	1286.3	2114.04	2457.43	2155.41	2370.06	1109.06	934.287	1767.75	2007.41	1666.55	1695.76	0.231604	-0.231604	0.55699	-0.55699	-0.0399353	0.0399353	0.972343	-0.972343	-1.44921	1.44921	-0.91511	0.91511	1.65021	-1.65021	-1.22481	1.22481	-0.167607	0.167607	0.782293	1
107	OG0002986	234.304	231.024	508.304	366.162	218.672	215.081	149.485	136.629	143.724	166.967	145.814	113.333	208.085	160.802	127.377	110.621	70.7986	153.525	0.0451356	-0.0451356	1.04098	-1.04098	0.053007	-0.053007	0.287746	-0.287746	-0.479097	0.479097	0.802695	-0.802695	0.820855	-0.820855	0.450892	-0.450892	-2.36173	2.36173	0.783555	1
622	OG0004243	1277.15	1330.66	2720.03	2606.12	847.955	894.997	189.756	199.844	440.719	498.237	291.619	257.096	351.327	533.875	621.13	641.648	710.364	483.829	-0.200812	0.200812	0.209289	-0.209289	-0.264113	0.264113	-0.253374	0.253374	-0.599436	0.599436	0.615685	-0.615685	-2.01801	2.01801	-0.158999	0.158999	1.85631	-1.85631	0.784004	1
1189	OG0005596	1052.95	230.639	423.202	339.389	300.788	368.816	447.489	594.883	588.929	793.393	79.5744	55.2592	179.87	217.602	596.718	647.484	142.393	70.9528	2.35313	-2.35313	0.403695	-0.403695	-0.373166	0.373166	-0.519389	0.519389	-0.543303	0.543303	0.662392	-0.662392	-0.348688	0.348688	-0.149871	0.149871	1.22997	-1.22997	0.784547	1
417	OG0003730	449.172	394.755	560.066	411.479	260.124	387.797	613.803	543.989	528.854	513.631	351.875	419.122	669.024	637.875	322.216	302.428	408.086	362.289	0.652769	-0.652769	1.54828	-1.54828	-1.99483	1.99483	0.61044	-0.61044	0.147833	-0.147833	-0.882981	0.882981	0.241286	-0.241286	0.320687	-0.320687	0.60182	-0.60182	0.786118	1
284	OG0003371	2849.29	2985.44	3030.72	3073.52	1982.65	1947.31	3105.91	3017.43	1386.83	1430.15	2395.52	2544.73	1144.74	840.929	2593.11	2741.92	1159.82	1538.16	-0.317589	0.317589	-0.0954199	0.0954199	0.122402	-0.122402	0.196666	-0.196666	-0.20934	0.20934	-0.411101	0.411101	2.08246	-2.08246	-0.379641	0.379641	-1.9086	1.9086	0.786732	1
914	OG0004939	669.395	542.738	520.605	598.763	295.126	316.218	915.35	924.182	859.389	704.66	559.321	692.613	1066.73	930.375	661.518	612.473	1219.49	1106.06	1.41043	-1.41043	-0.942476	0.942476	-0.465688	0.465688	-0.0648088	0.0648088	1.33534	-1.33534	-1.43713	1.43713	0.921604	-0.921604	0.519636	-0.519636	0.65841	-0.65841	0.788952	1
472	OG0003881	622.071	620.456	583.853	755.048	223.064	177.61	352.27	360.37	273.977	314.105	186.282	224.31	462.567	423.837	507.729	492.209	326.143	224.466	0.0134943	-0.0134943	-1.32769	1.32769	1.17796	-1.17796	-0.11803	0.11803	-0.708545	0.708545	-0.961715	0.961715	0.453698	-0.453698	0.161169	-0.161169	1.91749	-1.91749	0.790809	1
1175	OG0005561	373.866	367.347	205.42	203.694	370.065	387.515	271.899	266.451	260.941	166.946	439.269	384.941	269.398	343.968	303.247	238.286	395.358	597.815	0.0728043	-0.0728043	0.0349208	-0.0349208	-0.19067	0.19067	0.0837688	-0.0837688	1.81836	-1.81836	0.54562	-0.54562	-1.00636	1.00636	0.992957	-0.992957	-1.68738	1.68738	0.791828	1
259	OG0003307	53.9408	157.458	91.3125	107.79	156.714	123.783	59.197	66.9508	172.915	215.222	63.4801	120.357	105.803	86.6132	171.979	210.334	166.249	43.0334	-1.66136	1.66136	-0.280775	0.280775	0.398321	-0.398321	-0.208539	0.208539	-0.369806	0.369806	-1.04968	1.04968	0.338362	-0.338362	-0.340372	0.340372	1.9975	-1.9975	0.792237	1
1186	OG0005586	206.097	207.403	377.56	247.488	268.442	250.01	79.251	65.3321	98.8104	102.43	276.441	339.048	238.467	183.166	150.964	152.547	120.922	322.751	-0.0171309	0.0171309	1.12919	-1.12919	0.192908	-0.192908	0.522378	-0.522378	-0.0976036	0.0976036	-0.551956	0.551956	0.711705	-0.711705	-0.0283061	0.0283061	-2.46841	2.46841	0.792275	1
200	OG0003187	268.494	217.053	386.801	407.627	213.789	254.852	1435.65	1793.03	1250.57	1266.46	1361.97	1644.66	1208.09	899.148	1517.21	1582.69	1851.09	1382.3	1.06776	-1.06776	-0.264218	0.264218	-0.883081	0.883081	-1.11559	1.11559	-0.0636423	0.0636423	-0.947589	0.947589	1.4776	-1.4776	-0.212872	0.212872	1.46121	-1.46121	0.792613	1
79	OG0002929	386.962	318.081	126.228	82.0152	1264.39	1311.91	327.722	328.089	748.098	640.043	653.154	501.075	456.707	630.743	319.996	231.898	478.089	905.452	0.600636	-0.600636	1.30527	-1.30527	-0.113392	0.113392	-0.0034403	0.0034403	0.478559	-0.478559	0.810034	-0.810034	-0.983912	0.983912	0.981385	-0.981385	-1.89902	1.89902	0.792965	1
754	OG0004544	76.2605	44.4406	163.649	145.62	698.214	740.82	212.146	176.011	481.414	494.095	200.21	269.164	226.69	571.275	559.581	570.057	403.313	189.58	1.18497	-1.18497	0.262032	-0.262032	-0.133082	0.133082	0.418443	-0.418443	-0.0584309	0.0584309	-0.660326	0.660326	-1.94103	1.94103	-0.0416843	0.0416843	1.62038	-1.62038	0.794337	1
253	OG0003294	1371.43	1306.48	1176.01	996.398	404.903	362.497	435.166	401.201	261.061	291.011	584.163	573.207	474.498	480.991	628.456	559.698	417.64	680.98	0.256467	-0.256467	0.874324	-0.874324	0.58436	-0.58436	0.429442	-0.429442	-0.573676	0.573676	0.100112	-0.100112	-0.0718582	0.0718582	0.611957	-0.611957	-2.53478	2.53478	0.794939	1
419	OG0003734	268.488	267.067	786.526	708.726	403.256	438.975	163.257	169.89	360.43	283.906	1638.61	1891.63	230.331	277.943	145.132	123.307	852.797	828.294	0.0388033	-0.0388033	0.760874	-0.760874	-0.620182	0.620182	-0.291124	0.291124	1.73673	-1.73673	-1.04808	1.04808	-1.36983	1.36983	1.18897	-1.18897	0.213138	-0.213138	0.799025	1
967	OG0005051	2598.12	1673.91	177.948	292.328	295.747	246.37	370.249	409.379	458.786	513.249	291.159	349.819	245.792	275.813	503.491	637.084	655.483	266.348	1.10891	-1.10891	-1.2467	1.2467	0.466872	-0.466872	-0.257265	0.257265	-0.287198	0.287198	-0.46909	0.46909	-0.295017	0.295017	-0.600375	0.600375	2.16377	-2.16377	0.800021	1
853	OG0004788	170.762	176.612	598.153	443.782	123.462	201.739	265.625	289.514	104.705	151.573	122.356	127.377	265.871	256.649	86.3236	94.6365	120.119	67.4578	-0.110582	0.110582	0.972919	-0.972919	-1.58064	1.58064	-0.282589	0.282589	-1.20092	1.20092	-0.132033	0.132033	0.115903	-0.115903	-0.301665	0.301665	1.84359	-1.84359	0.800649	1
390	OG0003656	253.505	279.813	556.632	743.468	200.561	221.697	177.593	139.456	155.233	165.487	107.172	84.7573	107.705	66.0249	100.082	88.5498	58.8742	94.7898	-0.348135	0.348135	-1.01425	1.01425	-0.35326	0.35326	0.848964	-0.848964	-0.225636	0.225636	0.82425	-0.82425	1.69322	-1.69322	0.431479	-0.431479	-1.64957	1.64957	0.802948	1
473	OG0003882	639.301	312.777	244.757	188.718	374.886	388.341	568.298	571.555	322.821	292.485	440.189	314.233	263.432	287.883	199.055	182.423	217.964	370.436	2.05835	-2.05835	0.775889	-0.775889	-0.105806	0.105806	-0.0171482	0.0171482	0.295893	-0.295893	1.00203	-1.00203	-0.266175	0.266175	0.261669	-0.261669	-1.55523	1.55523	0.805342	1
479	OG0003897	196.967	190.738	170.955	168.649	172.701	245.252	320.393	324.858	262.746	229.136	158.689	204.178	253.934	222.568	124.941	110.623	151.938	135.497	0.187856	-0.187856	0.0793982	-0.0793982	-2.02976	2.02976	-0.08091	0.08091	0.798979	-0.798979	-1.46584	1.46584	0.769705	-0.769705	0.710692	-0.710692	0.668844	-0.668844	0.806118	1
713	OG0004450	2294.8	2366.55	1129	1722.72	189.578	206.021	409.634	508.847	661.356	820.033	323.357	577.421	722.192	704.975	866.653	833.078	1194.83	314.028	-0.0641526	0.0641526	-0.867749	0.867749	-0.173233	0.173233	-0.450212	0.450212	-0.446442	0.446442	-1.17556	1.17556	0.0502815	-0.0502815	0.0823302	-0.0823302	2.43303	-2.43303	0.806934	1
990	OG0005112	1270.23	1085.83	893.732	1127.74	755.313	727.662	438.386	409.38	596.231	714.344	316.918	458.459	625.942	540.619	752.06	676.151	420.018	308.212	0.743316	-0.743316	-1.09942	1.09942	0.17708	-0.17708	0.324953	-0.324953	-0.855929	0.855929	-1.7337	1.7337	0.694636	-0.694636	0.504781	-0.504781	1.45814	-1.45814	0.80698	1
305	OG0003429	228.248	213.999	245.755	175.005	167.015	238.904	148.921	134.71	132.212	130.551	158.229	110.518	133.207	105.782	106.961	96.4125	80.3444	151.78	0.207312	-0.207312	1.08193	-1.08193	-1.13952	1.13952	0.322392	-0.322392	0.0406761	-0.0406761	1.14228	-1.14228	0.738369	-0.738369	0.333743	-0.333743	-1.98015	1.98015	0.809217	1
739	OG0004500	1310.38	1322.47	781.594	725.793	413.94	415.906	357.246	332.128	355.38	309.067	406.151	401.332	536.354	401.122	324.657	302.428	283.186	490.232	-0.0420316	0.0420316	0.339016	-0.339016	-0.0217018	0.0217018	0.333692	-0.333692	0.638339	-0.638339	0.0546621	-0.0546621	1.32105	-1.32105	0.324623	-0.324623	-2.45162	2.45162	0.810248	1
589	OG0004155	120.922	177.872	190.561	190.284	2959.97	2632.61	320.393	332.331	322.254	316.468	621.421	680.433	338.307	378.397	418.084	429.038	1105.86	927.544	-2.40894	2.40894	0.00918202	-0.00918202	0.739809	-0.739809	-0.231146	0.231146	0.11449	-0.11449	-0.572903	0.572903	-0.706962	0.706962	-0.163441	0.163441	1.10831	-1.10831	0.813801	1
425	OG0003745	225.133	208.597	314.776	279.138	2081.48	2164.08	182.99	156.623	153.555	138.248	125.107	101.152	208.353	209.082	160.444	149.439	71.5941	120.959	0.36565	-0.36565	0.575491	-0.575491	-0.1866	0.1866	0.744612	-0.744612	0.503079	-0.503079	1.01537	-1.01537	-0.0167479	0.0167479	0.340591	-0.340591	-2.45876	2.45876	0.816134	1
445	OG0003795	4637.68	4809.91	3374.32	3906.01	3339.23	2966.61	4132.17	3377.83	2465.49	2667.03	980.186	1643.26	1532.56	826.805	4527.65	4750.1	1443.81	1946.98	-0.119821	0.119821	-0.480031	0.480031	0.388396	-0.388396	0.660209	-0.660209	-0.258104	0.258104	-1.6613	1.6613	1.96615	-1.96615	-0.157599	0.157599	-0.975371	0.975371	0.817196	1
1003	OG0005142	162.312	257.364	34.528	80.2765	414.995	404.707	360.845	363.029	706.458	725.191	551.041	587.71	827.567	557.307	1347.88	1375.3	525.819	376.827	-1.25487	1.25487	-2.20784	2.20784	0.0695348	-0.0695348	-0.0167166	0.0167166	-0.0724975	0.0724975	-0.178409	0.178409	1.08124	-1.08124	-0.0558023	0.0558023	0.914521	-0.914521	0.817841	1
777	OG0004593	504.691	495.614	568.496	476.955	1148.49	1142.55	759.101	807.55	763.813	724.116	851.865	1076.62	833.961	817.86	868.557	898.41	1139.14	1114.8	0.172556	-0.172556	1.66513	-1.66513	0.0492939	-0.0492939	-0.588094	0.588094	0.507348	-0.507348	-2.21633	2.21633	0.185369	-0.185369	-0.321287	0.321287	0.205385	-0.205385	0.818587	1
649	OG0004293	771.857	722.69	203.734	205.305	831.399	931.802	484.508	503.293	442.679	408.237	444.784	517.006	537.165	433.78	431.172	417.111	443.883	476.851	0.608146	-0.608146	-0.0709836	0.0709836	-1.05267	1.05267	-0.351542	0.351542	0.74824	-0.74824	-1.38815	1.38815	1.96839	-1.96839	0.306419	-0.306419	-0.661915	0.661915	0.818789	1
1180	OG0005574	753.419	676.868	266.046	265.206	1581.83	1487.38	361.388	374.237	584.362	710.981	459.949	498.171	365.163	286.466	624.683	684.278	1156.65	983.947	0.795954	-0.795954	0.023517	-0.023517	0.457666	-0.457666	-0.259763	0.259763	-1.45369	1.45369	-0.593269	0.593269	1.79604	-1.79604	-0.67708	0.67708	1.19984	-1.19984	0.819057	1
169	OG0003124	177.787	197.227	94.219	132.081	459.108	498.718	256.282	268.106	158.883	169.039	186.282	192.471	173.901	146.604	273.395	288.225	175.803	98.8605	-0.435267	0.435267	-1.4049	1.4049	-0.347252	0.347252	-0.189337	0.189337	-0.260082	0.260082	-0.137197	0.137197	0.715182	-0.715182	-0.221734	0.221734	2.35229	-2.35229	0.819062	1
362	OG0003592	713.435	578.119	992.689	1431.86	405.099	311.197	654.479	647.09	1394.58	1691.29	937.055	1212.26	734.675	798.336	2785.43	2802.05	1450.18	873.456	0.788733	-0.788733	-1.36362	1.36362	0.986906	-0.986906	0.0427358	-0.0427358	-0.723851	0.723851	-0.963937	0.963937	-0.312625	0.312625	-0.0223918	0.0223918	1.86849	-1.86849	0.820976	1
1119	OG0005415	241.778	186.947	186.064	205.088	397.029	406.807	259.746	223.169	229.622	248.973	310.474	222.91	248.508	168.257	258.973	228.345	151.946	295.093	0.840612	-0.840612	-0.319683	0.319683	-0.079951	0.079951	0.497831	-0.497831	-0.265762	0.265762	1.07902	-1.07902	1.26563	-1.26563	0.41309	-0.41309	-2.10466	2.10466	0.821032	1
407	OG0003704	56.9748	92.9767	64.6848	85.8923	780.424	771.724	240.899	269.318	542.048	585.856	396.497	481.879	494.577	430.216	699.467	743.648	828.892	391.267	-1.47244	1.47244	-0.863765	0.863765	0.0343747	-0.0343747	-0.341602	0.341602	-0.238203	0.238203	-0.596145	0.596145	0.426819	-0.426819	-0.187755	0.187755	2.19963	-2.19963	0.822755	1
554	OG0004077	164.199	214.468	110.14	110.793	241.165	261.506	425.347	490.064	417.698	455.015	329.337	367.614	167.661	137.378	287.597	295.073	353.985	254.711	-1.50961	1.50961	-0.0336166	0.0336166	-0.460169	0.460169	-0.803934	0.803934	-0.486239	0.486239	-0.624541	0.624541	1.12894	-1.12894	-0.145899	0.145899	1.85462	-1.85462	0.822912	1
936	OG0004989	532.664	424.683	684.314	482.57	542.149	367.061	233.57	214.486	326.184	317.063	938.794	883.674	325.285	276.52	288.485	313.848	163.083	386.731	0.649388	-0.649388	0.995404	-0.995404	1.10871	-1.10871	0.24523	-0.24523	0.0816372	-0.0816372	0.17413	-0.17413	0.466531	-0.466531	-0.242435	0.242435	-2.34194	2.34194	0.823544	1
155	OG0003087	1672.76	1499.74	2241.39	1961.71	1085.46	1191.45	1073.05	927.718	1205.65	1228.27	1051.03	1126.25	1212.43	831.349	1457.07	1421.32	118.257	176.664	0.52921	-0.52921	0.645696	-0.645696	-0.451721	0.451721	0.704884	-0.704884	-0.0901799	0.0901799	-0.335279	0.335279	1.80938	-1.80938	0.120516	-0.120516	-1.92177	1.92177	0.827082	1
1057	OG0005268	760.943	684.144	362.138	758.094	345.126	117.192	1186.86	1131.7	244.219	311.734	122.811	248.198	265.868	292.6	605.597	664.99	308.65	179.688	0.204407	-0.204407	-1.35948	1.35948	1.89628	-1.89628	0.0914966	-0.0914966	-0.467088	0.467088	-1.29987	1.29987	-0.184105	0.184105	-0.179792	0.179792	1.01573	-1.01573	0.827649	1
86	OG0002949	1642.63	2049.52	1017.3	1212.13	547.055	450.13	999.517	1011.43	1436.4	1692.75	879.918	1067.25	1449.27	1546.26	1942.46	2027.47	2537.62	1413.11	-0.898906	0.898906	-0.71284	0.71284	0.792824	-0.792824	-0.0483222	0.0483222	-0.668234	0.668234	-0.784755	0.784755	-0.264117	0.264117	-0.17465	0.17465	2.3217	-2.3217	0.82862	1
515	OG0003982	292.286	302.843	203.75	167.515	320.331	423.732	242.672	262.348	219.791	190.357	252.058	264.584	240.909	209.079	161.33	141.572	265.686	303.56	-0.231083	0.231083	1.27133	-1.27133	-1.81023	1.81023	-0.507533	0.507533	0.934823	-0.934823	-0.315829	0.315829	0.921424	-0.921424	0.849694	-0.849694	-0.866697	0.866697	0.830975	1
111	OG0002997	140.987	175.353	1060.19	1059.26	159.571	258.726	1099.87	998.505	927.186	1028.45	870.263	686.052	877.648	754.313	399.663	372.201	319.779	343.686	-1.02601	1.02601	0.00415501	-0.00415501	-2.23878	2.23878	0.456243	-0.456243	-0.489023	0.489023	1.11789	-1.11789	0.71377	-0.71377	0.336026	-0.336026	-0.340319	0.340319	0.833895	1
617	OG0004237	96.2728	110.829	140.673	138.568	343.45	235.725	451.917	454.72	451.387	421.263	956.737	931.918	513.022	443.712	396.778	372.967	255.36	459.405	-0.57127	0.57127	0.0612722	-0.0612722	1.51178	-1.51178	-0.0251318	0.0251318	0.28057	-0.28057	0.106809	-0.106809	0.588827	-0.588827	0.251426	-0.251426	-2.32029	2.32029	0.835936	1
1109	OG0005394	969.323	900.03	339.783	473.079	406.976	364.699	1200.51	1243.33	911.469	1014.23	885.442	1041.96	950.475	852.963	1217.6	1288.32	1241.43	842.501	0.378831	-0.378831	-1.67589	1.67589	0.559907	-0.559907	-0.179056	0.179056	-0.545362	0.545362	-0.829941	0.829941	0.55259	-0.55259	-0.288448	0.288448	1.95641	-1.95641	0.839647	1
767	OG0004576	183.603	119.549	530.22	458.626	209.094	137.582	236.711	225.088	273.132	255.486	152.709	149.387	82.7455	72.4108	277.389	293.297	254.557	500.124	1.35923	-1.35923	0.465751	-0.465751	1.32697	-1.32697	0.161906	-0.161906	0.214738	-0.214738	0.0707411	-0.0707411	0.42849	-0.42849	-0.179316	0.179316	-2.09323	2.09323	0.841725	1
580	OG0004141	178.324	137.768	299.453	315.924	339.263	404.561	233.247	221.049	294.463	333.342	214.805	213.539	450.356	401.47	285.156	318.666	297.513	207.026	1.4346	-1.4346	-0.299262	0.299262	-0.981576	0.981576	0.300219	-0.300219	-0.692437	0.692437	0.0330338	-0.0330338	0.641684	-0.641684	-0.620523	0.620523	2.00534	-2.00534	0.843032	1
938	OG0004993	293.754	280.375	452.612	479.872	472.201	463.726	206.929	183.585	295.586	301.959	226.304	293.623	276.723	271.195	317.908	303.74	242.72	222.145	0.433959	-0.433959	-0.544399	0.544399	0.168618	-0.168618	1.11319	-1.11319	-0.198597	0.198597	-2.41113	2.41113	0.187862	-0.187862	0.424417	-0.424417	0.824182	-0.824182	0.844144	1
451	OG0003816	382.438	320.859	90.7219	104.524	144.774	177.756	84.0851	76.948	98.5296	104.206	86.9339	81.4839	84.3733	62.4751	71.6774	69.7722	73.185	84.3222	1.09512	-1.09512	-0.884187	0.884187	-1.27901	1.27901	0.554341	-0.554341	-0.35022	0.35022	0.404742	-0.404742	1.86514	-1.86514	0.168465	-0.168465	-0.884397	0.884397	0.84541	1
612	OG0004223	590.265	553.988	445.554	428.283	457.922	563.589	858.569	822.963	638.054	631.458	745.87	781.843	641.913	493.195	608.259	609.779	767.655	895.473	0.485819	-0.485819	0.302876	-0.302876	-1.58509	1.58509	0.324472	-0.324472	0.0796128	-0.0796128	-0.360826	0.360826	2.00764	-2.00764	-0.0191144	0.0191144	-1.17767	1.17767	0.846446	1
556	OG0004083	408.206	755.988	820.805	816.952	1790.34	1102.21	582.072	803.208	1984.01	1841.84	614.512	1655.9	1434.35	1322.27	1048.98	1205.16	4407.82	1566.07	-1.10984	1.10984	0.0087401	-0.0087401	0.883828	-0.883828	-0.593064	0.593064	0.138056	-0.138056	-1.70407	1.70407	0.151046	-0.151046	-0.257411	0.257411	1.76729	-1.76729	0.849121	1
564	OG0004103	141.302	118.26	103.021	85.9802	145.138	122.854	285.276	247.304	133.619	152.757	163.288	136.743	78.1335	55.0207	190.844	208.556	57.2752	160.503	0.474856	-0.474856	0.482291	-0.482291	0.444781	-0.444781	0.381378	-0.381378	-0.357476	0.357476	0.473255	-0.473255	0.928478	-0.928478	-0.237206	0.237206	-2.53545	2.53545	0.849433	1
190	OG0003165	170.394	164.647	172.952	97.2124	416.162	413.369	257.894	279.013	220.917	183.545	340.376	246.793	260.176	227.537	87.4354	100.723	98.6407	385.556	0.0725707	-0.0725707	1.18595	-1.18595	0.0142411	-0.0142411	-0.1664	0.1664	0.390873	-0.390873	0.674225	-0.674225	0.283104	-0.283104	-0.298746	0.298746	-2.50671	2.50671	0.850147	1
586	OG0004150	262.08	328.895	739.887	528.804	261.324	261.54	372.263	314.054	314.961	404.688	600.722	493.582	295.171	261.26	450.258	382.857	329.333	621.077	-0.782859	0.782859	1.15207	-1.15207	-0.00286195	0.00286195	0.587281	-0.587281	-0.863349	0.863349	0.677952	-0.677952	0.422005	-0.422005	0.560209	-0.560209	-2.12557	2.12557	0.850255	1
441	OG0003783	314.309	439.122	1071.62	1050.51	210.821	317.142	129.511	136.628	381.209	310.846	1309.53	825.61	618.012	865.423	100.97	59.3698	1049.26	1856.26	-0.877717	0.877717	0.0526913	-0.0526913	-1.06698	1.06698	-0.141686	0.141686	0.538693	-0.538693	1.20085	-1.20085	-0.883668	0.883668	1.37464	-1.37464	-1.47159	1.47159	0.852679	1
955	OG0005031	358.275	342.482	438.125	448.265	691.834	626.924	391.188	354.042	714.079	830.59	316.918	358.244	322.032	231.083	355.278	408.49	225.124	232.037	0.302762	-0.302762	-0.153684	0.153684	0.661202	-0.661202	0.669604	-0.669604	-1.01327	1.01327	-0.822254	0.822254	2.20888	-2.20888	-0.935915	0.935915	-0.20316	0.20316	0.853633	1
497	OG0003941	73.3357	59.2906	97.9022	75.574	144.886	144.237	105.188	117.847	81.6898	77.2667	109.012	111.923	97.6669	71.7044	77.8932	67.9937	58.8662	100.605	0.861093	-0.861093	1.04657	-1.04657	0.0182752	-0.0182752	-0.461507	0.461507	0.226258	-0.226258	-0.107135	0.107135	1.24641	-1.24641	0.551761	-0.551761	-2.1282	2.1282	0.854644	1
1184	OG0005583	140.538	143.065	314.998	384.161	527.563	548.463	311.42	310.505	538.407	549.153	337.924	351.692	497.558	408.218	490.422	452.885	587.875	554.201	-0.171596	0.171596	-1.90493	1.90493	-0.374024	0.374024	0.0283183	-0.0283183	-0.19027	0.19027	-0.384443	0.384443	1.89935	-1.89935	0.766277	-0.766277	0.567782	-0.567782	0.855341	1
375	OG0003624	173.297	145.489	1281.6	2042.25	178.843	125.96	152.706	132.185	309.849	308.771	324.277	308.604	233.869	316.795	298.12	312.864	468.543	396.024	0.715938	-0.715938	-1.87826	1.87826	1.42398	-1.42398	0.591199	-0.591199	0.0143079	-0.0143079	0.203257	-0.203257	-1.23599	1.23599	-0.19805	0.19805	0.68844	-0.68844	0.857198	1
444	OG0003790	533.079	664.784	553.573	640.509	849.864	1257	333.682	310.619	560.297	577.283	451.224	452.376	1071.35	847.681	660.722	660.515	515.485	426.839	-1.14287	1.14287	-0.756775	0.756775	-2.00863	2.00863	0.372073	-0.372073	-0.155205	0.155205	-0.013259	0.013259	1.21149	-1.21149	0.00162779	-0.00162779	0.977818	-0.977818	0.857319	1
625	OG0004250	588.703	484.316	829.796	1139.23	440.036	231.063	121.376	100.072	131.092	139.139	352.335	355.438	191.533	262.325	237.667	216.167	461.392	512.912	0.686579	-0.686579	-1.10909	1.10909	2.19763	-2.19763	0.678952	-0.678952	-0.210162	0.210162	-0.0309442	0.0309442	-1.10081	1.10081	0.334346	-0.334346	-0.373191	0.373191	0.859146	1
348	OG0003561	1772.4	1730.64	162.151	87.1539	1086.61	1088.31	147.471	171.77	423.593	428.963	299.899	369.487	369.235	474.243	174.644	156.29	271.262	327.984	0.0946465	-0.0946465	2.38867	-2.38867	-0.00622006	0.00622006	-0.604379	0.604379	-0.0500142	0.0500142	-0.825477	0.825477	-0.988536	0.988536	0.4404	-0.4404	-0.751612	0.751612	0.859333	1
490	OG0003917	966.317	906.201	426.451	432.725	295.276	323.417	288.659	285.778	289.978	393.64	164.673	195.744	1808.88	1503.31	418.971	401.127	247.397	161.085	0.316905	-0.316905	-0.0720799	0.0720799	-0.448976	0.448976	0.0495065	-0.0495065	-1.49681	1.49681	-0.850963	0.850963	0.910647	-0.910647	0.21478	-0.21478	2.08575	-2.08575	0.860453	1
561	OG0004096	84.5018	24.8959	96.9032	79.536	14.0214	199.289	265.062	240.337	104.983	66.9023	117.292	86.6352	193.975	102.942	125.602	105.039	82.7309	118.633	1.41029	-1.41029	0.254778	-0.254778	-2.24809	2.24809	0.126626	-0.126626	0.573449	-0.573449	0.389112	-0.389112	0.793576	-0.793576	0.230768	-0.230768	-0.461488	0.461488	0.861949	1
920	OG0004952	1722.21	1177.68	1893.38	1533.12	370.032	430.43	1374.92	1315.79	504.02	483.438	567.885	595.676	1173.85	832.048	1516.32	1606.8	716.728	978.132	1.67239	-1.67239	0.936386	-0.936386	-0.672019	0.672019	0.195718	-0.195718	0.185639	-0.185639	-0.212718	0.212718	1.51762	-1.51762	-0.258018	0.258018	-1.37365	1.37365	0.862134	1
215	OG0003220	367.009	365.151	234.766	362.766	651.468	688.689	460.132	390.191	521.463	500.197	626.48	745.999	338.033	212.983	1058.74	1091.11	620.474	550.711	0.0216571	-0.0216571	-1.828	1.828	-0.237003	0.237003	0.701897	-0.701897	0.17763	-0.17763	-0.743113	0.743113	1.93661	-1.93661	-0.12851	0.12851	0.508301	-0.508301	0.862684	1
517	OG0003984	238.457	207.499	203.234	333.293	426.561	411.702	469.835	365.46	519.566	558.561	306.798	323.126	364.626	506.893	565.874	510.984	665.029	330.316	0.427809	-0.427809	-1.49386	1.49386	0.109238	-0.109238	0.770051	-0.770051	-0.222897	0.222897	-0.159732	0.159732	-1.00598	1.00598	0.314123	-0.314123	2.07233	-2.07233	0.862811	1
894	OG0004886	92.6651	94.5209	1226.15	842.013	304.961	417.063	371.858	327.283	879.474	906.773	719.858	581.158	1307.11	1029.42	820.851	781.959	260.921	598.391	-0.0585969	0.0585969	1.09782	-1.09782	-0.917679	0.917679	0.376845	-0.376845	-0.0903314	0.0903314	0.63012	-0.63012	0.702441	-0.702441	0.143418	-0.143418	-2.32121	2.32121	0.865905	1
483	OG0003905	136.887	142.843	130.869	135.52	397.771	462.846	242.187	263.663	336.859	316.758	268.626	286.126	315.244	285.398	457.362	496.268	377.054	277.385	-0.32039	0.32039	-0.262726	0.262726	-1.13769	1.13769	-0.638791	0.638791	0.462723	-0.462723	-0.474634	0.474634	0.74765	-0.74765	-0.61385	0.61385	2.29145	-2.29145	0.866691	1
207	OG0003206	860.294	699.279	445.807	247.011	488.672	461.159	544.54	474.011	250.961	262.585	578.639	487.499	332.607	323.742	211.706	205.255	150.348	359.969	0.573365	-0.573365	1.59352	-1.59352	0.160865	-0.160865	0.384555	-0.384555	-0.125702	0.125702	0.474756	-0.474756	0.0750128	-0.0750128	0.0859236	-0.0859236	-2.28122	2.28122	0.867174	1
499	OG0003946	148.118	153.468	126.248	150.286	283.322	311.571	151.257	158.339	98.2489	86.1479	145.566	121.973	140.532	116.786	99.1944	95.9051	91.4813	119.796	-0.23246	0.23246	-1.13916	1.13916	-0.622306	0.622306	-0.29981	0.29981	0.86002	-0.86002	1.15567	-1.15567	1.20937	-1.20937	0.22095	-0.22095	-1.75628	1.75628	0.867984	1
826	OG0004704	2641.6	2949	662.089	952.342	5928.78	6470.94	2779.88	3487.3	2964.03	2487.63	3303.95	3271.53	2947.1	3281.72	2656.95	2584.36	6720.3	4109.11	-0.464937	0.464937	-1.52026	1.52026	-0.369723	0.369723	-0.954478	0.954478	0.738929	-0.738929	0.0416847	-0.0416847	-0.454269	0.454269	0.117104	-0.117104	2.03889	-2.03889	0.870063	1
961	OG0005042	2048.5	2522.71	466.034	1109.42	159.426	590.804	1060	861.273	2457.63	2693.08	252.531	308.136	431.631	359.232	1609.53	1728.07	1153.47	107.002	-0.272742	0.272742	-1.07369	1.07369	-1.51174	1.51174	0.27195	-0.27195	-0.120184	0.120184	-0.260745	0.260745	0.240681	-0.240681	-0.0933789	0.0933789	2.18276	-2.18276	0.870367	1
954	OG0005030	327.59	412.555	746.691	731.757	315.711	262.945	679.043	588.621	465.419	456.495	2649.87	593.334	482.092	409.283	798.211	795.145	364.334	2858.23	-0.329065	0.329065	0.0289563	-0.0289563	0.26139	-0.26139	0.204469	-0.204469	0.0277482	-0.0277482	1.81768	-1.81768	0.234142	-0.234142	0.0055171	-0.0055171	-2.21837	2.21837	0.8711	1
307	OG0003435	1996.13	1426.32	4336.92	4111.88	734.276	603.214	3519.25	3696.94	1760.62	1799.63	922.175	1666.57	1077.5	898.691	2336.07	2448.37	1866.16	1305.16	1.20795	-1.20795	0.193247	-0.193247	0.71096	-0.71096	-0.178652	0.178652	-0.0795007	0.0795007	-2.08628	2.08628	0.656483	-0.656483	-0.170295	0.170295	1.28347	-1.28347	0.871769	1
462	OG0003856	50.9225	87.5015	255.434	316.536	438.118	514.617	621.538	598.619	410.961	489.948	204.686	274.423	329.897	381.95	395.446	394.53	499.559	206.444	-1.41935	1.41935	-0.573787	0.573787	-0.431275	0.431275	0.100888	-0.100888	-0.470911	0.470911	-0.781805	0.781805	-0.392761	0.392761	0.00622858	-0.00622858	2.22997	-2.22997	0.872864	1
599	OG0004189	774.308	707.896	110.953	91.6383	521.56	583.552	271.505	219.131	229.06	172.589	213.885	155.007	319.856	382.305	85.214	66.7302	68.4121	239.586	0.205915	-0.205915	0.43814	-0.43814	-0.257795	0.257795	0.490568	-0.490568	0.646145	-0.646145	0.733504	-0.733504	-0.408729	0.408729	0.559057	-0.559057	-2.55409	2.55409	0.874539	1
447	OG0003800	138.517	140.352	230.146	184.104	132.023	143.989	145.94	140.667	149.616	136.768	112.237	127.372	152.2	140.924	144.242	117.725	108.982	155.851	-0.076011	0.076011	1.28426	-1.28426	-0.500945	0.500945	0.212566	-0.212566	0.518395	-0.518395	-0.729901	0.729901	0.444504	-0.444504	1.16964	-1.16964	-2.0449	2.0449	0.874662	1
925	OG0004966	87.7883	104.129	185.189	140.701	176.243	244.197	283.666	289.715	196.501	163.119	278.74	273.95	277.808	244.576	107.183	110.113	186.145	251.804	-0.8391	0.8391	1.34536	-1.34536	-1.59284	1.59284	-0.103969	0.103969	0.914815	-0.914815	0.0854201	-0.0854201	0.626945	-0.626945	-0.132885	0.132885	-1.47752	1.47752	0.876169	1
1163	OG0005523	3011.87	3757.81	959.666	1366.87	411.611	378.688	391.833	362.423	1053.23	1243.37	685.306	775.268	747.426	716.334	1331.69	1367.79	1600.06	917.071	-0.887812	0.887812	-1.41022	1.41022	0.335652	-0.335652	0.314168	-0.314168	-0.667072	0.667072	-0.496273	0.496273	0.171142	-0.171142	-0.107743	0.107743	2.18622	-2.18622	0.878747	1
1204	OG0005629	1377.36	1485.82	452.423	542.568	375.274	434.673	1562.1	1446.87	598.754	905	777.805	735.233	380.084	338.296	1632.38	1635.22	995.157	550.642	-0.290209	0.290209	-0.694063	0.694063	-0.561831	0.561831	0.293379	-0.293379	-1.56016	1.56016	0.215552	-0.215552	0.445635	-0.445635	-0.00664979	0.00664979	2.20298	-2.20298	0.880723	1
980	OG0005089	12.9372	65.0406	360.328	335.601	232.623	178.334	100.033	100.578	165.9	98.2856	288.597	180.295	175.803	220.083	77.0011	61.1458	44.5474	315.772	-1.79614	1.79614	0.095512	-0.095512	0.355104	-0.355104	-0.00729834	0.00729834	0.687981	-0.687981	0.620883	-0.620883	-0.300663	0.300663	0.308515	-0.308515	-2.02342	2.02342	0.881475	1
218	OG0003228	202.056	195.779	612.761	511.302	276.615	348.522	233.811	235.994	206.601	174.667	258.962	219.164	213.782	193.105	233.673	220.734	163.075	273.902	0.143125	-0.143125	0.818732	-0.818732	-1.04337	1.04337	-0.0421447	0.0421447	0.759727	-0.759727	0.755024	-0.755024	0.46095	-0.46095	0.25828	-0.25828	-2.30051	2.30051	0.881707	1
1083	OG0005322	197.379	188.244	58.9424	60.1635	110.118	158.376	181.541	206.205	136.706	96.8054	237.339	214.476	96.853	91.5829	85.6578	73.3243	148.757	184.346	0.234167	-0.234167	-0.101342	0.101342	-1.77669	1.77669	-0.628754	0.628754	1.68905	-1.68905	0.500191	-0.500191	0.276456	-0.276456	0.766848	-0.766848	-1.05611	1.05611	0.882518	1
300	OG0003422	210.896	190.281	193.868	159.028	382.219	408.192	193.784	186.514	195.375	166.973	206.065	210.266	162.233	172.162	193.502	172.53	169.447	232.613	0.677321	-0.677321	1.30129	-1.30129	-0.433133	0.433133	0.251966	-0.251966	1.03316	-1.03316	-0.132986	0.132986	-0.391364	0.391364	0.755212	-0.755212	-2.07079	2.07079	0.885775	1
811	OG0004666	388.231	477.291	169.955	151.105	227.153	174.465	356.898	410.288	410.122	450.284	758.036	750.678	557.594	640.714	438.277	442.988	768.188	805.655	-1.43511	1.43511	0.818851	-0.818851	1.82967	-1.82967	-0.970598	0.970598	-0.65102	0.65102	0.0680212	-0.0680212	-0.967433	0.967433	-0.0745445	0.0745445	-0.332022	0.332022	0.886326	1
588	OG0004154	626.084	750.175	282.654	350.838	418.509	398.777	696.843	785.537	1494.78	1276.53	574.012	566.112	683.351	993.173	747.578	729.127	1698.27	979.888	-0.71181	0.71181	-0.849693	0.849693	0.1906	-0.1906	-0.472344	0.472344	0.621742	-0.621742	0.054702	-0.054702	-1.4589	1.4589	0.0986355	-0.0986355	2.1176	-2.1176	0.889439	1
1066	OG0005285	657.234	837.214	745.882	888.279	3217.04	3229.71	2928.48	3198.59	3227.62	3166.45	2194.96	2792	3370.59	2912.54	2636.97	2499.37	3274.16	2324.76	-1.29728	1.29728	-0.93864	0.93864	-0.0211759	0.0211759	-0.474878	0.474878	0.103047	-0.103047	-1.28962	1.28962	0.785284	-0.785284	0.288583	-0.288583	1.82657	-1.82657	0.889454	1
614	OG0004228	1243.79	463.292	572.214	583.162	3227.9	2566.72	1367.26	1399	1088.04	899.668	937.869	863.996	1392.56	1765.63	758.469	866.952	774.011	808.912	2.65622	-2.65622	-0.055051	0.055051	0.662887	-0.662887	-0.0666682	0.0666682	0.550573	-0.550573	0.238182	-0.238182	-0.686271	0.686271	-0.38774	0.38774	-0.128091	0.128091	0.890041	1
457	OG0003832	1139.16	3487.74	988.932	1238.31	1560.27	1448.81	1303.8	1663.27	2218.18	2495.92	1356.9	1628.27	2000.54	1807.52	1561.15	1629.4	2508.15	1411.36	-2.40288	2.40288	-0.530044	0.530044	0.175353	-0.175353	-0.573517	0.573517	-0.278907	0.278907	-0.430333	0.430333	0.239946	-0.239946	-0.101263	0.101263	1.32468	-1.32468	0.890982	1
1126	OG0005437	827.076	908.1	493.695	656.792	621.708	663.015	645.236	719.868	791.325	891.971	571.735	594.261	589.799	716.689	1373.18	1463.61	1325.28	453.252	-0.256773	0.256773	-0.779552	0.779552	-0.176805	0.176805	-0.300634	0.300634	-0.328789	0.328789	-0.106236	0.106236	-0.534074	0.534074	-0.175291	0.175291	2.69618	-2.69618	0.895022	1
682	OG0004379	762.783	810.779	475.526	485.051	446.258	587.29	680.009	606.092	535.038	452.348	497.225	468.298	760.442	696.811	581.852	550.569	428.769	541.407	-0.410131	0.410131	-0.133343	0.133343	-1.83481	1.83481	0.772815	-0.772815	1.1261	-1.1261	0.402847	-0.402847	0.587144	-0.587144	0.371456	-0.371456	-1.56113	1.56113	0.90361	1
1022	OG0005179	135.948	139.522	144.479	166.691	460.49	460.741	97.6168	95.3267	182.184	173.776	232.748	245.388	303.584	191.685	139.58	109.098	124.088	207.607	-0.102509	0.102509	-0.564033	0.564033	-0.0021602	0.0021602	0.0937907	-0.0937907	0.186655	-0.186655	-0.208895	0.208895	1.78531	-1.78531	0.968567	-0.968567	-1.98963	1.98963	0.904267	1
224	OG0003244	578.491	541.581	390.559	351.753	563.33	511.507	250.16	272.65	342.184	324.757	343.14	481.874	405.589	499.446	338.859	353.428	750.155	460.574	0.295992	-0.295992	0.469555	-0.469555	0.433072	-0.433072	-0.386386	0.386386	0.234703	-0.234703	-1.51041	1.51041	-0.931486	0.931486	-0.189026	0.189026	2.14831	-2.14831	0.904282	1
1094	OG0005351	298.715	301.71	148.477	228.291	691.638	641.059	296.951	319.301	260.222	261.996	875.778	1076.14	394.74	269.779	408.541	444.259	352.402	233.189	-0.039323	0.039323	-1.67005	1.67005	0.299196	-0.299196	-0.28592	0.28592	-0.0267816	0.0267816	-0.809253	0.809253	1.48248	-1.48248	-0.330183	0.330183	1.60491	-1.60491	0.906156	1
453	OG0003819	227.774	159.404	339.473	255.674	237.183	187.531	315.158	315.366	192.004	189.762	270.461	221.037	109.061	105.072	107.627	107.317	105.8	263.434	1.01469	-1.01469	0.809088	-0.809088	0.671768	-0.671768	-0.00189316	0.00189316	0.0337375	-0.0337375	0.577822	-0.577822	0.107057	-0.107057	0.00828157	-0.00828157	-2.45315	2.45315	0.906382	1
27	OG0002809	67.4112	50.0446	456.148	381.994	348.841	340.172	226.245	210.446	163.374	166.082	273.681	198.559	169.832	171.093	144.021	127.873	116.149	259.945	0.949183	-0.949183	0.56797	-0.56797	0.080774	-0.080774	0.232262	-0.232262	-0.0527659	0.0527659	1.02121	-1.02121	-0.0237495	0.0237495	0.381245	-0.381245	-2.45447	2.45447	0.907088	1
350	OG0003567	125.287	116.4	114.134	54.8964	231.461	234.544	2816.37	3671.39	153.271	141.508	205.146	149.392	174.173	156.191	69.0167	72.3119	96.2542	219.238	0.188521	-0.188521	1.79677	-1.79677	-0.0339185	0.0339185	-0.675684	0.675684	0.2046	-0.2046	0.806257	-0.806257	0.279054	-0.279054	-0.119541	0.119541	-1.99858	1.99858	0.907894	1
596	OG0004165	96.6907	190.715	109.64	269.341	338.549	332.54	564.271	435.735	317.49	396.399	97.3153	165.6	344.281	359.228	417.637	523.67	451.035	76.7623	-1.00714	1.00714	-1.29728	1.29728	0.0275642	-0.0275642	0.395703	-0.395703	-0.340283	0.340283	-0.79956	0.79956	-0.065409	0.065409	-0.346778	0.346778	2.18306	-2.18306	0.908101	1
100	OG0002969	250.911	305.551	1145.86	903.061	383.082	437.857	375.805	378.58	328.996	320.02	286.56	293.155	216.495	175.711	107.627	95.1439	145.575	215.167	-1.01031	1.01031	1.21926	-1.21926	-0.686518	0.686518	-0.0378554	0.0378554	0.142304	-0.142304	-0.117053	0.117053	1.06993	-1.06993	0.633432	-0.633432	-1.98494	1.98494	0.90973	1
985	OG0005099	400.994	458.559	419.769	387.886	420.311	521.845	346.005	415.237	237.479	232.099	242.863	221.51	299.24	266.229	257.641	257.777	260.125	245.413	-1.08424	1.08424	0.639126	-0.639126	-1.74474	1.74474	-1.47238	1.47238	0.185484	-0.185484	0.744449	-0.744449	0.945134	-0.945134	-0.00424614	0.00424614	0.471167	-0.471167	0.909753	1
290	OG0003393	2436.75	3145.77	2061.94	2901.64	1352.16	1364.28	4517.88	4400.33	2922.88	3555.32	1891.69	2206.5	2243.15	1568.79	3307.48	3400.44	1411.2	1053.16	-1.10167	1.10167	-1.46742	1.46742	-0.038724	0.038724	0.11433	-0.11433	-0.846813	0.846813	-0.666327	0.666327	1.53451	-1.53451	-0.120208	0.120208	1.26023	-1.26023	0.911653	1
260	OG0003308	88.4962	44.9481	359.453	323.28	116.372	149.311	360.181	340.611	312.712	267.029	436.049	369.487	392.027	484.186	460.244	393.008	425.587	533.847	2.31784	-2.31784	0.376312	-0.376312	-0.880563	0.880563	0.198337	-0.198337	0.559678	-0.559678	0.586886	-0.586886	-0.747038	0.747038	0.559683	-0.559683	-0.801432	0.801432	0.913303	1
917	OG0004944	680.33	584.853	463.288	301.603	463.421	508.376	355.107	347.176	196.498	199.532	232.284	182.636	214.867	166.127	155.338	153.753	103.414	284.369	0.400914	-0.400914	1.12299	-1.12299	-0.245761	0.245761	0.0599981	-0.0599981	-0.0406957	0.0406957	0.635676	-0.635676	0.679631	-0.679631	0.0272502	-0.0272502	-2.47907	2.47907	0.913985	1
274	OG0003351	268.36	283.245	370.942	335.819	217.822	234.13	397.954	426.143	424.435	350.216	542.302	671.54	436.245	409.993	465.57	478.003	556.437	556.527	-0.475945	0.475945	0.876565	-0.876565	-0.636471	0.636471	-0.60332	0.60332	1.68992	-1.68992	-1.87796	1.87796	0.547185	-0.547185	-0.232409	0.232409	-0.00142151	0.00142151	0.914388	1
297	OG0003410	106.734	68.4404	398.164	321.191	338.614	340.458	349.308	403.524	778.412	804.941	312.318	360.121	321.546	327.813	289.816	295.832	424.799	354.735	2.2814	-2.2814	1.11671	-1.11671	-0.02834	0.02834	-0.75157	0.75157	-0.174858	0.174858	-0.741909	0.741909	-0.100719	0.100719	-0.107192	0.107192	0.93801	-0.93801	0.914392	1
1011	OG0005158	103.476	98.3931	375.104	194.225	406.453	358.01	213.838	258.716	154.669	156.603	281.974	270.447	169.287	155.485	114.952	98.186	122.513	337.87	0.12554	-0.12554	1.58413	-1.58413	0.315964	-0.315964	-0.473533	0.473533	-0.0309734	0.0309734	0.104042	-0.104042	0.211893	-0.211893	0.392233	-0.392233	-2.33242	2.33242	0.918733	1
61	OG0002889	401.306	427.582	402.476	324.369	554.056	509.047	419.461	433.92	344.991	315.586	145.341	144.484	415.082	334.38	406.762	402.652	264.11	514.075	-0.25494	0.25494	0.864213	-0.864213	0.340485	-0.340485	-0.136267	0.136267	0.358002	-0.358002	0.0237656	-0.0237656	0.865977	-0.865977	0.0408351	-0.0408351	-2.58328	2.58328	0.919345	1
573	OG0004117	425.004	405.559	173.263	153.847	100.759	194.589	252.013	234.479	263.026	218.774	395.108	310.009	168.744	175.001	264.521	295.071	462.975	414.051	0.185276	-0.185276	0.469723	-0.469723	-2.51413	2.51413	0.285215	-0.285215	0.726859	-0.726859	0.955091	-0.955091	-0.144059	0.144059	-0.432036	0.432036	0.441458	-0.441458	0.924595	1
83	OG0002943	98.2185	151.908	1510.99	1028.27	1860.8	2538.35	396.423	453.712	382.607	325.352	1575.84	1262.07	888.497	790.878	824.896	725.928	902.881	1728.32	-1.29063	1.29063	1.14306	-1.14306	-0.92608	0.92608	-0.405191	0.405191	0.486271	-0.486271	0.664806	-0.664806	0.349512	-0.349512	0.383714	-0.383714	-1.88628	1.88628	0.924669	1
725	OG0004477	494.445	432.336	298.201	258.53	555.979	583.542	173.486	149.756	266.678	235.646	501.365	330.628	171.731	309.891	249.087	249.899	399.543	461.254	0.506328	-0.506328	0.538373	-0.538373	-0.182752	0.182752	0.554658	-0.554658	0.466758	-0.466758	1.55046	-1.55046	-2.16735	2.16735	-0.012294	0.012294	-0.541651	0.541651	0.925633	1
833	OG0004731	80.5605	41.5927	142.671	158.55	211.054	199.182	172.68	163.994	112.843	100.355	141.215	128.314	293.815	154.058	124.046	120.772	61.2527	141.894	1.53546	-1.53546	-0.253743	0.253743	0.139292	-0.139292	0.124182	-0.124182	0.281938	-0.281938	0.230383	-0.230383	1.50194	-1.50194	0.0643759	-0.0643759	-1.91066	1.91066	0.92575	1
455	OG0003829	230.041	220.169	98.5266	62.8626	219.213	334.64	326.676	354.346	227.373	150.389	335.776	281.447	336.137	208.724	238.553	197.899	110.573	370.436	0.0905134	-0.0905134	0.912132	-0.912132	-0.860232	0.860232	-0.167703	0.167703	0.841176	-0.841176	0.363322	-0.363322	0.96523	-0.96523	0.384468	-0.384468	-2.22994	2.22994	0.925926	1
677	OG0004366	80.9346	110.158	394.48	380.44	438.039	502.543	970.926	986.993	522.409	515.703	670.624	466.893	509.224	360.3	491.532	511.24	283.998	535.586	-1.03784	1.03784	0.122955	-0.122955	-0.465418	0.465418	-0.0556909	0.0556909	0.0438396	-0.0438396	1.21547	-1.21547	1.16233	-1.16233	-0.133381	0.133381	-2.08326	2.08326	0.926584	1
1206	OG0005633	133.27	183.075	612.076	552.485	2113.71	2350.69	1272.88	1369.72	1619.43	1443.5	798.964	797.98	1650.16	1911.58	2169.76	2044.78	1186.87	1109.87	-2.23294	2.23294	0.725741	-0.725741	-0.752847	0.752847	-0.519747	0.519747	0.814649	-0.814649	0.00873275	-0.00873275	-1.04098	1.04098	0.420585	-0.420585	0.47548	-0.47548	0.927295	1
1089	OG0005342	112.475	127.774	180.134	107.615	226.466	253.486	127.256	171.164	168.152	137.41	272.296	181.704	172.819	154.764	102.965	97.1762	155.916	359.387	-0.337788	0.337788	1.33678	-1.33678	-0.298609	0.298609	-0.780441	0.780441	0.53364	-0.53364	1.05842	-1.05842	0.29234	-0.29234	0.153411	-0.153411	-2.09443	2.09443	0.928079	1
477	OG0003891	101.608	81.4198	705.42	810.552	1295.25	1261.35	775.693	784.929	786.55	621.39	821.042	746.468	852.143	717.754	835.943	789.822	565.593	846.13	1.13108	-1.13108	-0.71115	0.71115	0.135957	-0.135957	-0.0606908	0.0606908	1.20292	-1.20292	0.48786	-0.48786	0.877827	-0.877827	0.29091	-0.29091	-2.03777	2.03777	0.92837	1
507	OG0003964	205.015	234.434	177.636	118.847	327.66	313.025	258.778	235.589	126.037	136.472	181.232	153.597	621.815	512.229	409.203	442.485	53.3058	124.454	-0.410573	0.410573	1.2161	-1.2161	0.140096	-0.140096	0.287681	-0.287681	-0.243804	0.243804	0.506184	-0.506184	0.592659	-0.592659	-0.239671	0.239671	-2.45475	2.45475	0.929853	1
861	OG0004805	47.6328	69.5538	766.421	716.128	170.306	121.547	347.133	319.405	115.653	127.89	201.006	178.422	158.709	91.9378	266.072	270.463	78.7614	219.238	-0.902576	0.902576	0.163682	-0.163682	0.806113	-0.806113	0.200722	-0.200722	-0.242432	0.242432	0.287196	-0.287196	1.28537	-1.28537	-0.0394849	0.0394849	-2.27453	2.27453	0.930275	1
1051	OG0005248	399.99	478.961	318.37	332.16	124.652	155.771	134.907	156.018	263.029	287.059	126.036	159.68	228.161	165.772	97.6411	92.6068	163.083	108.165	-0.794687	0.794687	-0.187501	0.187501	-0.981518	0.981518	-0.641833	0.641833	-0.386376	0.386376	-1.04154	1.04154	1.4008	-1.4008	0.234051	-0.234051	1.79078	-1.79078	0.931005	1
678	OG0004371	1159.34	1055.89	1259.93	1498.12	247.312	214.415	969.073	918.831	668.651	745.431	669.713	686.525	803.465	659.003	933.584	954.482	591.057	644.92	0.782064	-0.782064	-1.4464	1.4464	1.19321	-1.19321	0.445696	-0.445696	-0.909342	0.909342	-0.207613	0.207613	1.65434	-1.65434	-0.185368	0.185368	-0.729854	0.729854	0.931656	1
550	OG0004071	124.819	139.583	294.643	423.452	497.335	394.344	341.579	354.903	621.666	661.509	259.955	339.83	298.429	331.541	796.884	698.232	458.202	297.739	-0.470185	0.470185	-1.51046	1.51046	0.972611	-0.972611	-0.161095	0.161095	-0.261467	0.261467	-1.1214	1.1214	-0.442593	0.442593	0.555621	-0.555621	1.78745	-1.78745	0.934721	1
778	OG0004594	197.528	171.452	230.02	170.348	119.723	184.658	176.546	168.639	373.062	364.13	200.086	164.841	165.762	184.941	86.5455	76.8763	167.848	201.204	0.660259	-0.660259	1.39248	-1.39248	-1.99313	1.99313	0.214013	-0.214013	0.113201	-0.113201	0.902333	-0.902333	-0.510911	0.510911	0.552785	-0.552785	-0.844432	0.844432	0.936654	1
1140	OG0005469	129.353	143.099	335.789	232.774	322.446	422.512	198.936	247.809	171.234	152.461	366.599	358.253	328.541	296.757	148.905	132.694	415.246	543.151	-0.483404	0.483404	1.736	-1.736	-1.28702	1.28702	-1.04819	1.04819	0.555679	-0.555679	0.110319	-0.110319	0.487021	-0.487021	0.551573	-0.551573	-1.27872	1.27872	0.937549	1
941	OG0005000	107.146	59.7161	244.629	234.994	154.273	254.293	340.769	314.255	510.617	395.804	298.064	257.564	623.443	455.433	581.293	523.155	148.757	223.308	1.72313	-1.72313	0.121783	-0.121783	-1.48405	1.48405	0.245386	-0.245386	0.767867	-0.767867	0.441866	-0.441866	0.944035	-0.944035	0.31911	-0.31911	-1.21469	1.21469	0.937758	1
385	OG0003646	437.944	383.054	228.584	144.358	357.985	400.318	69.5877	65.1332	92.354	85.2568	361.544	357.307	144.87	138.084	86.5477	81.4458	154.333	304.194	0.473265	-0.473265	1.59867	-1.59867	-0.395179	0.395179	0.234056	-0.234056	0.282861	-0.282861	0.0417206	-0.0417206	0.169757	-0.169757	0.214981	-0.214981	-2.31356	2.31356	0.939974	1
742	OG0004515	44.3962	68.7443	363.325	382.921	196.851	234.607	413.096	360.608	685.78	575.8	308.174	249.608	147.046	113.236	193.285	162.63	146.37	296.582	-1.34633	1.34633	-0.16428	0.16428	-0.547462	0.547462	0.424418	-0.424418	0.545388	-0.545388	0.656878	-0.656878	0.812639	-0.812639	0.538834	-0.538834	-2.12154	2.12154	0.941957	1
1177	OG0005563	4.39035	80.9789	687.875	389.103	361.845	453.81	407.539	351.719	298.115	235.945	388.213	398.054	379.002	493.057	291.146	292.79	248.193	361.713	-2.66205	2.66205	0.823164	-0.823164	-0.334557	0.334557	0.218148	-0.218148	0.345422	-0.345422	-0.0371383	0.0371383	-0.38808	0.38808	-0.00835368	0.00835368	-0.552287	0.552287	0.94221	1
943	OG0005003	726.444	1198.37	824.615	1854.67	1382.11	1526.17	1973.75	2454.16	1458.3	1854.7	459.057	663.115	1568.64	1257.67	2158.09	2613.03	1648.25	100.599	-0.689792	0.689792	-1.08162	1.08162	-0.139358	0.139358	-0.305246	0.305246	-0.336627	0.336627	-0.511599	0.511599	0.309546	-0.309546	-0.26827	0.26827	2.48975	-2.48975	0.942734	1
1074	OG0005304	281.559	233.752	109.641	115.495	248.735	257.078	553.357	510.946	425.558	363.834	515.628	472.508	464.189	410.352	848.807	786.523	329.333	528.619	0.966262	-0.966262	-0.270803	0.270803	-0.171782	0.171782	0.415039	-0.415039	0.814394	-0.814394	0.4545	-0.4545	0.641177	-0.641177	0.396683	-0.396683	-2.41929	2.41929	0.947232	1
389	OG0003654	557.631	365.841	220.967	204.477	283.747	374.673	301.95	349.498	516.789	351.694	579.463	405.439	248.237	318.055	184.855	160.854	472.529	651.904	1.41986	-1.41986	0.264981	-0.264981	-0.944123	0.944123	-0.49899	0.49899	1.29963	-1.29963	1.20798	-1.20798	-0.842896	0.842896	0.474625	-0.474625	-1.09062	1.09062	0.947339	1
1174	OG0005549	223.534	247.992	466.849	378.22	242.756	281.318	334.649	358.89	462.618	448.801	329.797	303.921	222.732	193.453	398.327	364.592	268.072	384.975	-0.61143	0.61143	1.23627	-1.23627	-0.867359	0.867359	-0.412012	0.412012	0.178699	-0.178699	0.481316	-0.481316	0.829289	-0.829289	0.521239	-0.521239	-2.11015	2.11015	0.948129	1
405	OG0003698	80.2331	115.488	249.501	307.195	142.982	200.592	259.585	279.921	186.392	168.743	296.219	277.701	298.565	261.121	338.417	302.936	394.563	327.409	-1.72743	1.72743	-0.993881	0.993881	-1.60804	1.60804	-0.361498	0.361498	0.476593	-0.476593	0.309435	-0.309435	0.641589	-0.641589	0.530551	-0.530551	0.892021	-0.892021	0.950041	1
352	OG0003571	275.956	223.732	362.826	395.932	349.135	343.472	422.359	438.663	66.5258	65.7211	172.479	143.768	184.753	131.34	132.259	117.217	115.346	194.813	0.88194	-0.88194	-0.368191	0.368191	0.068997	-0.068997	-0.15979	0.15979	0.0513458	-0.0513458	0.766109	-0.766109	1.42594	-1.42594	0.508792	-0.508792	-2.16208	2.16208	0.951101	1
380	OG0003637	334.125	239.412	187	221.194	185.975	133.903	208.844	189.644	144.286	174.368	95.6779	103.026	155.727	120.687	223.245	180.398	74.776	115.143	1.26045	-1.26045	-0.639383	0.639383	1.2425	-1.2425	0.367756	-0.367756	-0.720558	0.720558	-0.282244	0.282244	0.967562	-0.967562	0.810213	-0.810213	-1.62232	1.62232	0.951307	1
392	OG0003659	766.263	634.246	871.929	733.294	184.108	288.259	675.661	619.017	367.698	352.404	731.353	641.105	507.325	489.145	481.548	429.292	613.322	691.448	0.978654	-0.978654	0.896652	-0.896652	-2.28913	2.28913	0.454234	-0.454234	0.220501	-0.220501	0.682691	-0.682691	0.18942	-0.18942	0.595635	-0.595635	-0.62165	0.62165	0.951569	1
769	OG0004578	309.317	267.884	479.896	358.238	155.743	178.271	160.357	151.673	150.181	154.832	177.088	201.832	157.352	119.271	210.15	211.093	157.515	212.265	0.754588	-0.754588	1.52584	-1.52584	-0.708995	0.708995	0.292536	-0.292536	-0.160321	0.160321	-0.686459	0.686459	1.44714	-1.44714	-0.0235198	0.0235198	-1.55642	1.55642	0.952236	1
38	OG0002829	1216.53	803.208	929.081	578.126	351.002	371.596	284.149	345.458	417.698	385.149	656.378	637.827	694.517	806.849	450.924	469.377	764.465	896.723	1.71817	-1.71817	1.95501	-1.95501	-0.239284	0.239284	-0.817576	0.817576	0.34039	-0.34039	0.120349	-0.120349	-0.62818	0.62818	-0.168344	0.168344	-0.668456	0.668456	0.953322	1
1023	OG0005183	82.5499	90.0089	122.69	96.2524	352.986	341.829	394.814	382.418	613.351	566.033	331.637	313.292	383.068	316.632	189.956	165.17	181.372	392.534	-0.306877	0.306877	0.857257	-0.857257	0.113995	-0.113995	0.113232	-0.113232	0.284834	-0.284834	0.201942	-0.201942	0.674088	-0.674088	0.495508	-0.495508	-2.61214	2.61214	0.953992	1
310	OG0003439	323.913	260.985	650.139	456.654	193.747	476.315	289.655	335.276	382.809	287.696	449.393	357.312	370.863	378.4	129.818	148.427	849.583	610.028	0.582508	-0.582508	0.946496	-0.946496	-2.28322	2.28322	-0.395249	0.395249	0.768031	-0.768031	0.618011	-0.618011	-0.054468	0.054468	-0.362102	0.362102	0.888603	-0.888603	0.954254	1
670	OG0004346	351.203	381.823	575.113	457.017	497.349	503.156	179.365	191.158	258.535	246.904	265.847	285.728	214.327	323.021	213.031	190.542	490.825	406.497	-0.458459	0.458459	1.25578	-1.25578	-0.063695	0.063695	-0.349314	0.349314	0.252559	-0.252559	-0.395573	0.395573	-2.22005	2.22005	0.611592	-0.611592	1.03142	-1.03142	0.955825	1
[truncated: 36 more rows]

## Sheet: left GO
GO.ID	Term	Annotated	Significant	Expected	classicFisher	holm	hochberg	hommel	bonferroni	BH	BY	fdr	none	FoldChange	ontology
[truncated: 113 more rows]

## Sheet: Figure 4 a mid (3 iso merge)
#The same as the first plot, except we allow 3 isoforms per gene, keeping only one copy (the most expressed) as a representative of this orthogroup
[truncated: 1,832 more rows]

[truncated: 4 more sheets: mid GO, Figure 4 a right (3iso2NA), right GO, 35 genes overlap SVM DEGs]
