# Supplementary material for: Social complexity, life-history and lineage influence the molecular basis of castes in vespid wasps
Source: Nat Commun. 2023 Feb 24;14:1046. doi: 10.1038/s41467-023-36456-6 (PMC9958023; doi:10.1038/s41467-023-36456-6)
Supplement: Supplementary file 8 — Supplementary Data 5 [file 41467_2023_36456_MOESM8_ESM.xlsx]

## Sheet: Angiopolybia
	Row.names	A_pal Queen	A_pal Worker	A_caj Queen.x	A_caj Worker.x	V_cra Queen.x	V_cra Worker.x	V_vul Queen.x	V_vul Worker.x	P_qua Queen.x	P_qua Worker.x	A_caj Queen.y	A_caj Worker.y	V_cra Queen.y	V_cra Worker.y	V_vul Queen.y	V_vul Worker.y	P_qua Queen.y	P_qua Worker.y	p.coeffs	q.coeffs
1520	OG0006563	865.881	939.493	377.327	468.288	316.77	396.069	369.697	484.722	317.778	399.126	-0.959066	0.959066	-0.991839	0.991839	-1.2003	1.2003	-1.01171	1.01171	1.66361e-07	0.000266676
1571	OG0007101	118.249	89.2584	144.328	116.228	63.5733	47.9295	245.519	190.373	159.853	111.115	0.726414	-0.726414	0.944982	-0.944982	0.85213	-0.85213	1.21149	-1.21149	1.37106e-05	0.0219645
391	OG0003217	684.636	775.093	200.938	216.325	753.871	827	600.728	682.132	571.713	632.414	-0.663306	0.663306	-0.8321	0.8321	-1.14143	1.14143	-0.90678	0.90678	1.51278e-05	0.0242195
26	OG0001416	495.43	399.6	1224.2	1092.02	554.096	494.68	456.902	416.38	353.481	333.344	0.8365	-0.8365	0.830444	-0.830444	0.68018	-0.68018	0.42978	-0.42978	4.87932e-05	0.0780691
957	OG0004558	191.649	126.395	256.599	214.913	386.566	340.052	230.416	176.566	124.958	107.249	0.674395	-0.674395	0.488317	-0.488317	1.00934	-1.00934	0.581779	-0.581779	0.000137902	0.220506
719	OG0004037	1519.61	1377.27	1623.72	1577.26	367.07	348.889	1493.28	1419.82	2404.58	2241.83	0.429767	-0.429767	0.751917	-0.751917	0.746637	-0.746637	1.03716	-1.03716	0.000149963	0.23964
818	OG0004252	85.2225	67.1067	219.51	181.654	654.062	392.562	58.9891	36.6938	71.0822	45.8832	0.463927	-0.463927	1.22833	-1.22833	1.14556	-1.14556	1.05916	-1.05916	0.000212483	0.339336
706	OG0004006	137.008	193.067	147.289	120.748	55.3375	45.328	226.344	209.438	189.125	152.575	0.847148	-0.847148	0.850666	-0.850666	0.331889	-0.331889	0.915101	-0.915101	0.000256123	0.408772
193	OG0002788	139.453	124.008	217.429	179.376	373.327	322.453	394.315	328.163	106.623	99.5075	1.22553	-1.22553	0.934392	-0.934392	1.17011	-1.17011	0.441152	-0.441152	0.000299226	0.477265
11	OG0001199	391.047	407.854	487.587	409.144	178.384	165.787	176.02	159.105	556.112	500.659	1.52868	-1.52868	0.639597	-0.639597	0.882038	-0.882038	0.917005	-0.917005	0.000310359	0.494713
1061	OG0004801	328.653	326.846	481.075	409.345	679.3	568.879	681.075	502.919	335.47	293.91	0.840628	-0.840628	0.923155	-0.923155	1.57019	-1.57019	0.68906	-0.68906	0.000331734	0.528453
149	OG0002517	305.616	465.401	323.019	352.301	61.0297	78.4505	52.2187	61.826	407.036	498.818	-0.329781	0.329781	-0.949947	0.949947	-0.640722	0.640722	-0.770629	0.770629	0.000342531	0.54531
1255	OG0005236	232.423	232.154	360.268	350.237	345.115	324.171	292.055	269.019	281.593	266.27	0.495927	-0.495927	1.09922	-1.09922	1.44225	-1.44225	0.982491	-0.982491	0.000346904	0.551925
1263	OG0005264	1153.97	960.349	786.538	695.817	636.084	570.514	1230.9	1084.75	983.251	943.826	0.930016	-0.930016	0.825819	-0.825819	0.959104	-0.959104	0.31089	-0.31089	0.000400326	0.636518
1491	OG0006349	170.853	178.3	307.753	281.478	393.741	355.193	754.212	647.111	130.746	123.645	0.874009	-0.874009	1.00886	-1.00886	1.49805	-1.49805	0.54715	-0.54715	0.000412503	0.655468
36	OG0001519	386.967	333.794	150.584	130.544	1060.95	922.088	548.793	489.049	367.632	351.401	1.08988	-1.08988	1.07062	-1.07062	0.880118	-0.880118	0.345128	-0.345128	0.000460588	0.731413
946	OG0004533	191.989	142.525	116.337	95.5383	96.7632	70.6894	219.1	158.2	128.976	114.616	0.713104	-0.713104	1.13112	-1.13112	1.17253	-1.17253	0.428236	-0.428236	0.000475441	0.754525
617	OG0003772	304.803	215.438	114.569	61.2337	98.2759	50.4764	138.098	84.8128	50.819	41.8292	1.19229	-1.19229	1.26284	-1.26284	0.939436	-0.939436	0.381329	-0.381329	0.000547263	0.86796
38	OG0001535	1654.7	2519.87	737.673	846.963	2625.73	3467.56	1863.94	2927.98	1984.37	2817.11	-0.382659	0.382659	-0.766542	0.766542	-1.232	1.232	-0.962271	0.962271	0.000574243	0.910176
1588	OG0007817	148.014	138.559	268.155	255.344	179.717	162.229	301.192	289.794	153.099	141.152	0.652837	-0.652837	1.36434	-1.36434	0.514478	-0.514478	1.08306	-1.08306	0.000612821	0.970709
342	OG0003114	72.3779	85.1321	153.845	140.321	155.433	134.848	101.881	86.4897	55.1611	42.382	0.503375	-0.503375	0.776446	-0.776446	0.89459	-0.89459	1.43439	-1.43439	0.000615961	0.975067
163	OG0002613	109.484	90.1314	121.528	78.9604	347.405	265.962	242.912	180.586	74.6235	65.6	1.43941	-1.43941	0.900175	-0.900175	0.997724	-0.997724	0.436259	-0.436259	0.000639538	1
550	OG0003618	148.222	118.142	157.128	151.856	208.848	189.08	712.912	626.22	60.3089	54.3596	0.241849	-0.241849	0.704226	-0.704226	0.917692	-0.917692	0.73547	-0.73547	0.000693657	1
899	OG0004438	50.1589	52.771	262.38	246.489	69.4819	58.6498	82.6111	73.5753	52.2647	42.7524	0.445256	-0.445256	1.20537	-1.20537	0.824876	-0.824876	1.4274	-1.4274	0.000695748	1
477	OG0003421	303.129	314.819	895.048	850.153	276.089	260.788	83.7961	82.5673	328.395	313.259	1.10408	-1.10408	1.22321	-1.22321	0.316996	-0.316996	1.01244	-1.01244	0.000716493	1
292	OG0003002	594.72	525.558	417.303	320.352	273.758	192.251	603.427	465.153	704.549	642.731	1.04986	-1.04986	1.3971	-1.3971	1.03363	-1.03363	0.36651	-0.36651	0.000736497	1
430	OG0003294	189.61	213.484	270.941	241.992	1023.54	984.224	891.695	766.978	455.442	406.497	0.947849	-0.947849	0.328825	-0.328825	1.26278	-1.26278	0.953659	-0.953659	0.000741359	1
651	OG0003873	375.346	254.962	840.34	684.915	192.27	138.538	187.287	127.035	361.524	319.157	0.640613	-0.640613	1.02112	-1.02112	1.20506	-1.20506	0.39129	-0.39129	0.000762409	1
1075	OG0004829	120.084	119.663	113.379	96.8687	222.439	170.137	217.822	138.43	118.524	94.7147	0.567889	-0.567889	0.963442	-0.963442	1.61157	-1.61157	0.807443	-0.807443	0.000775319	1
471	OG0003405	111.727	124.658	119.973	138.513	220.559	243.238	169.107	197.574	82.018	85.6854	-1.16583	1.16583	-0.794803	0.794803	-1.26185	1.26185	-0.355449	0.355449	0.000853103	1
1016	OG0004685	349.657	303.609	346.607	334.136	346.195	313.379	230.511	220.63	426.654	391.02	0.385564	-0.385564	1.04716	-1.04716	0.460974	-0.460974	0.917218	-0.917218	0.000922462	1
290	OG0002999	107.242	119.016	101.882	84.3825	75.6512	62.4092	113.621	76.9055	64.8103	56.018	0.792998	-0.792998	0.809566	-0.809566	1.62654	-1.62654	0.614184	-0.614184	0.000960125	1
1073	OG0004826	125.795	113.367	161.841	138.948	219.453	203.88	167.072	126.701	154.067	126.227	0.821799	-0.821799	0.397217	-0.397217	1.48385	-1.48385	1.07248	-1.07248	0.00108793	1
1247	OG0005220	240.784	206.315	298.451	245.396	136.171	123.186	182.032	171.839	256.991	226.836	1.37412	-1.37412	0.705209	-0.705209	0.40569	-0.40569	0.877889	-0.877889	0.00108853	1
735	OG0004067	252.813	206.311	215.565	198.29	234.11	219.489	207.086	194.826	330.806	283.038	0.625713	-0.625713	0.483191	-0.483191	0.457276	-0.457276	1.16649	-1.16649	0.00110652	1
1164	OG0005038	781.274	608.293	1757.35	1684.31	275.028	254.624	930.825	800.155	705.673	632.412	0.278526	-0.278526	0.505579	-0.505579	0.9907	-0.9907	0.718532	-0.718532	0.00114687	1
1052	OG0004784	342.113	458.888	87.4059	126.786	649.028	880.353	1398.07	1635.29	475.22	536.409	-1.31693	1.31693	-1.08341	1.08341	-0.560159	0.560159	-0.43325	0.43325	0.00125065	1
232	OG0002874	120.062	108.504	302.056	272.889	779.598	703.644	478.396	390.76	142.809	134.334	0.783722	-0.783722	0.791122	-0.791122	1.55771	-1.55771	0.472424	-0.472424	0.00149297	1
329	OG0003079	639.576	570.732	122.871	70.6081	566.395	350.28	245.329	151.499	736.524	670.322	1.31491	-1.31491	1.14764	-1.14764	1.151	-1.151	0.229068	-0.229068	0.00151342	1
464	OG0003380	211.627	181.123	165.814	150.117	284.372	238.691	324.012	226.159	152.938	124.935	0.437943	-0.437943	0.769807	-0.769807	1.56775	-1.56775	0.888293	-0.888293	0.00157286	1
157	OG0002568	552.521	412.415	863.062	725.008	239.695	168.248	317.478	268.45	711.466	637.754	0.700517	-0.700517	1.41132	-1.41132	0.674277	-0.674277	0.440244	-0.440244	0.00161054	1
400	OG0003239	264.029	286.237	145.453	118.207	554.348	485.512	303.512	254.444	262.134	251.9	1.39143	-1.39143	0.891344	-0.891344	1.18416	-1.18416	0.26807	-0.26807	0.00166092	1
687	OG0003962	249.755	261.043	127.294	111.454	100.045	74.4899	188.328	129.717	96.6525	85.3169	0.555575	-0.555575	1.22612	-1.22612	1.54324	-1.54324	0.521665	-0.521665	0.00169496	1
1043	OG0004759	1110.34	1410.76	76.1714	109.949	787.275	1127.02	544.329	912.444	1318.08	1438.96	-1.01307	1.01307	-0.990718	0.990718	-1.41059	1.41059	-0.244763	0.244763	0.00179874	1
326	OG0003076	121.309	101.42	102.576	98.6729	120.535	101.627	306.59	275.721	69.4724	63.5749	0.288259	-0.288259	1.26505	-1.26505	0.787923	-0.787923	0.658843	-0.658843	0.00190404	1
979	OG0004601	59.7373	52.5582	154.289	139.853	83.9406	59.4393	119.871	72.6155	77.6758	59.333	0.30848	-0.30848	1.07414	-1.07414	1.54317	-1.54317	0.841548	-0.841548	0.0020341	1
665	OG0003905	244.662	232.371	266.169	308.982	102.162	107.609	99.2292	104.317	331.451	360.43	-1.64112	1.64112	-0.572484	0.572484	-0.551038	0.551038	-0.923422	0.923422	0.00216846	1
1394	OG0005573	770.674	813.533	308.027	322.419	1194.25	1256.37	1165.33	1347.37	945.297	1035.78	-0.50403	0.50403	-0.559697	0.559697	-1.59963	1.59963	-1.00848	1.00848	0.00218599	1
1448	OG0005885	61.0829	70.1015	102.723	85.158	99.3161	83.442	155.094	148.349	289.961	220.571	0.991863	-0.991863	0.921523	-0.921523	0.235829	-0.235829	1.44201	-1.44201	0.00222152	1
334	OG0003093	159.028	137.903	157.471	137.228	52.0585	39.8558	259.105	240.401	304.912	271.614	0.812747	-0.812747	1.57084	-1.57084	0.443066	-0.443066	0.683389	-0.683389	0.00222774	1
268	OG0002958	269.529	190.893	535.117	443.355	851.274	818.093	1031.07	810.943	239.621	181.874	0.74446	-0.74446	0.157782	-0.157782	0.948654	-0.948654	1.08757	-1.08757	0.00228069	1
61	OG0001805	797.382	746.86	323.238	265.686	345.08	283.637	788.534	499.868	990.005	860.54	0.755641	-0.755641	0.755669	-0.755669	1.73244	-1.73244	0.540961	-0.540961	0.00242091	1
183	OG0002766	299.294	249.504	326.761	251.759	105.099	89.4927	368.892	226.226	454.957	387.153	0.8903	-0.8903	0.550755	-0.550755	1.64625	-1.64625	0.552928	-0.552928	0.00248264	1
1375	OG0005518	118.453	109.888	169.227	118.872	367.644	228.723	216.496	173.817	70.2781	63.9416	1.17012	-1.17012	1.55949	-1.55949	0.732027	-0.732027	0.316055	-0.316055	0.00254555	1
848	OG0004311	260.561	290.361	475.827	412.554	273.318	255.771	495.485	457.58	429.803	415.978	1.444	-1.444	0.672396	-0.672396	0.806352	-0.806352	0.331404	-0.331404	0.00259409	1
1537	OG0006693	49.1334	54.5128	125.991	122.545	178.958	178.246	343.896	331.917	53.8729	52.3326	0.503355	-0.503355	0.072365	-0.072365	0.64348	-0.64348	0.526511	-0.526511	0.00262768	1
207	OG0002814	220.804	213.265	214.562	248.731	234.173	253.107	158.503	216.34	201.185	283.407	-0.63953	0.63953	-0.336951	0.336951	-1.33796	1.33796	-1.47128	1.47128	0.00270382	1
1407	OG0005599	442.833	451.511	228.976	234.438	448.683	457.646	350.001	375.178	549.356	573.077	-0.561429	0.561429	-0.471141	0.471141	-1.65395	1.65395	-1.00678	1.00678	0.00290343	1
1259	OG0005246	112.744	104.026	99.1558	55.8862	131.035	86.1567	294.045	241.874	108.392	93.9776	1.60094	-1.60094	1.18532	-1.18532	0.558426	-0.558426	0.408603	-0.408603	0.00306418	1
1525	OG0006602	338.441	377.237	353.381	322.506	294.541	219.008	580.655	514.781	519.608	460.676	0.526394	-0.526394	1.69487	-1.69487	0.69296	-0.69296	0.692755	-0.692755	0.00308995	1
211	OG0002825	788.002	640.877	997.902	968.132	164.709	152.103	699.483	624.124	636.524	612.701	0.25378	-0.25378	0.666901	-0.666901	0.954241	-0.954241	0.319622	-0.319622	0.00310373	1
1353	OG0005471	244.862	201.539	601.113	476.115	383.29	357.184	664.97	504.629	180.92	164.553	1.15826	-1.15826	0.351915	-0.351915	1.36841	-1.36841	0.472906	-0.472906	0.00322859	1
893	OG0004425	627.549	403.074	1183.99	1080.37	2738.55	2073.45	739.328	490.162	554.988	479.472	0.28622	-0.28622	0.864469	-0.864469	1.26751	-1.26751	0.45658	-0.45658	0.00357633	1
546	OG0003609	223.66	167.441	121.634	108.719	681.65	400.691	458.114	285.834	269.535	220.387	0.302218	-0.302218	1.39922	-1.39922	1.24824	-1.24824	0.540743	-0.540743	0.00359212	1
435	OG0003306	154.54	116.837	200.776	176.316	205.923	191.096	106.001	74.4928	83.9478	64.6805	0.512154	-0.512154	0.294873	-0.294873	1.37833	-1.37833	1.02355	-1.02355	0.00360072	1
905	OG0004447	392.871	295.966	603.558	584.931	679.269	578.146	379.638	317.239	413.407	381.339	0.174869	-0.174869	0.897278	-0.897278	0.999025	-0.999025	0.4502	-0.4502	0.00362165	1
12	OG0001205	486.663	613.516	1429.71	1618.96	289.775	410.001	333.479	495.01	1679.28	1861.86	-0.445574	0.445574	-1.23323	1.23323	-1.39951	1.39951	-0.370103	0.370103	0.00368279	1
456	OG0003361	302.764	287.972	405.059	350.792	370.355	337.232	460.359	336.877	246.856	222.966	0.819398	-0.819398	0.534251	-0.534251	1.76769	-1.76769	0.580326	-0.580326	0.00389145	1
714	OG0004026	87.669	106.849	125.682	144.74	115.643	129.214	190.954	211.218	77.3542	78.1304	-1.04864	1.04864	-0.824664	0.824664	-0.749711	0.749711	-0.0742801	0.0742801	0.00391519	1
1388	OG0005547	213.058	164.4	210.608	177.38	207.117	172.032	326.237	323.136	149.08	126.778	0.919068	-0.919068	0.993067	-0.993067	0.0512345	-0.0512345	0.867608	-0.867608	0.00392322	1
1434	OG0005652	185.126	154.847	207.441	143.591	91.7552	48.6546	126.026	106.194	79.2824	66.1528	0.993988	-0.993988	1.67747	-1.67747	0.466691	-0.466691	0.493345	-0.493345	0.00399695	1
307	OG0003036	524.383	507.533	254.865	276.708	109.798	135.916	167.829	176.766	208.583	230.886	-0.678553	0.678553	-1.7553	1.7553	-0.42826	0.42826	-0.838066	0.838066	0.00401019	1
967	OG0004581	258.929	311.642	746.041	916.614	377.537	399.457	343.753	453.521	464.447	512.635	-1.07161	1.07161	-0.294675	0.294675	-1.43812	1.43812	-0.515154	0.515154	0.00407543	1
680	OG0003945	116.826	105.112	159.789	121.39	95.7276	87.6338	202.34	134.644	105.337	92.1349	1.10921	-1.10921	0.358534	-0.358534	1.6317	-1.6317	0.543018	-0.543018	0.00427112	1
1261	OG0005254	303.62	248.864	284.727	251.768	882.865	731.078	655.975	492.934	290.921	278.249	0.627909	-0.627909	0.96125	-0.96125	1.45045	-1.45045	0.227553	-0.227553	0.00428718	1
267	OG0002956	184.92	156.365	176.823	166.61	307.117	240.162	69.4045	50.3994	124.637	110.93	0.278237	-0.278237	1.14468	-1.14468	1.48426	-1.48426	0.544402	-0.544402	0.00440208	1
1540	OG0006706	698.294	729.925	165.123	126.754	228.68	188.677	539.24	388.817	687.989	671.295	1.20698	-1.20698	0.880035	-0.880035	1.48818	-1.48818	0.112765	-0.112765	0.00461576	1
444	OG0003329	200.415	224.338	171.62	180.482	313.396	357.803	311.845	332.32	306.842	316.023	-0.550408	0.550408	-1.44678	1.44678	-0.695048	0.695048	-0.322314	0.322314	0.00467888	1
4	OG0000951	679.335	455.194	1358.59	1304.24	78.4066	53.4302	330.45	253.403	288.993	238.631	0.135652	-0.135652	1.25918	-1.25918	0.877096	-0.877096	0.634412	-0.634412	0.00472816	1
469	OG0003401	73.8051	41.4823	837.454	375.096	608.373	305.329	679.412	254.173	100.961	97.2705	1.0989	-1.0989	0.955825	-0.955825	1.31267	-1.31267	0.0536512	-0.0536512	0.00474336	1
1420	OG0005628	305.82	215.002	753.968	751.184	174.83	152.308	175.119	152.704	268.569	227.575	0.0181618	-0.0181618	0.676166	-0.676166	0.671528	-0.671528	0.811487	-0.811487	0.00500555	1
1412	OG0005610	325.395	307.084	157.315	71.0202	1346.95	781.793	912.797	604.419	413.953	387.643	1.58285	-1.58285	1.11191	-1.11191	0.851262	-0.851262	0.137465	-0.137465	0.00501225	1
1081	OG0004841	187.777	146.16	162.465	114.81	64.325	26.6619	118.734	77.3411	155.834	134.701	0.706556	-0.706556	1.70168	-1.70168	0.867855	-0.867855	0.299021	-0.299021	0.00515389	1
1445	OG0005853	555.983	628.066	335.331	305.338	293.994	276.566	403.783	386.137	1178.32	1166.06	1.15781	-1.15781	0.755423	-0.755423	0.55247	-0.55247	0.129335	-0.129335	0.00516478	1
906	OG0004448	521.121	544.454	427.085	438.341	445.218	468.984	274.586	317.44	518.645	592.425	-0.263387	0.263387	-0.526428	0.526428	-1.46581	1.46581	-1.34472	1.34472	0.0052208	1
380	OG0003195	142.515	150.936	151.54	145.795	83.0865	50.2064	525.264	348.203	135.732	104.297	0.118186	-0.118186	1.50876	-1.50876	1.23986	-1.23986	0.801022	-0.801022	0.0052543	1
1404	OG0005594	136.599	133.127	341.878	318.33	123.87	98.5003	237.09	172.979	129.301	119.038	0.375481	-0.375481	1.20105	-1.20105	1.64587	-1.64587	0.43503	-0.43503	0.00568541	1
575	OG0003671	258.116	231.29	530.926	493.452	201.308	160.57	470.205	323.706	147.795	131.753	0.332841	-0.332841	1.02426	-1.02426	1.67892	-1.67892	0.522117	-0.522117	0.00580483	1
158	OG0002569	348.228	312.517	177.273	145.694	250.889	237.369	358.713	339.658	410.572	375.908	1.64312	-1.64312	0.465305	-0.465305	0.4585	-0.4585	0.740658	-0.740658	0.00582668	1
1022	OG0004698	945.602	940.145	917.008	981.605	152.105	156.428	580.323	662.688	618.994	747.769	-0.596706	0.596706	-0.245716	0.245716	-1.16212	1.16212	-1.65241	1.65241	0.00588433	1
1098	OG0004891	193.076	179.82	204.093	193.53	162.722	133.722	154.005	145.634	160.659	147.23	0.472543	-0.472543	1.74011	-1.74011	0.496938	-0.496938	0.775838	-0.775838	0.00607768	1
652	OG0003878	90.1177	89.6927	345.648	286.128	286.838	275.244	460.452	373.705	169.986	159.76	1.37637	-1.37637	0.301374	-0.301374	1.51931	-1.51931	0.453078	-0.453078	0.00610173	1
1428	OG0005640	101.123	91.8666	202.394	196.44	444.99	414.757	196.234	160.211	166.287	142.254	0.223679	-0.223679	0.526935	-0.526935	1.51439	-1.51439	1.1672	-1.1672	0.00618096	1
538	OG0003586	266.067	281.674	215.44	216.546	277.63	302.622	256.642	297.233	262.295	298.703	-0.0490432	0.0490432	-0.82531	0.82531	-1.40426	1.40426	-1.24355	1.24355	0.00627175	1
1084	OG0004847	186.955	144.859	426.135	427.844	59.5566	42.3299	351.706	241.676	194.436	144.654	-0.0133805	0.0133805	1.13068	-1.13068	1.24004	-1.24004	0.981781	-0.981781	0.00632587	1
813	OG0004242	87.8627	87.078	131.488	114.216	150.683	125.081	158.281	138.051	137.821	137.834	1.10411	-1.10411	1.45818	-1.45818	1.07224	-1.07224	-0.000743924	0.000743924	0.00655378	1
634	OG0003819	139.453	139.208	158.711	125.19	169.994	120.085	257.401	196.805	77.9975	77.9424	1.01129	-1.01129	1.47362	-1.47362	1.14266	-1.14266	0.00302338	-0.00302338	0.00671623	1
1125	OG0004963	211.303	209.062	300.385	286.398	264.132	243.385	255.981	246.298	247.019	208.593	0.512037	-0.512037	0.878145	-0.878145	0.414098	-0.414098	1.81166	-1.81166	0.0070183	1
679	OG0003941	59.3315	56.6823	96.9508	96.2879	54.7324	44.6659	74.2329	58.173	56.4493	49.3825	0.0420403	-0.0420403	1.24118	-1.24118	1.4865	-1.4865	0.81835	-0.81835	0.00706737	1
755	OG0004107	613.683	931.875	401.336	865.212	304.772	487.457	329.125	648.927	1094.94	1093.36	-1.33912	1.33912	-0.843125	0.843125	-1.19553	1.19553	0.00263173	-0.00263173	0.00738763	1
1256	OG0005237	319.688	353.991	97.2662	92.8419	356.728	295.508	351.375	262.384	117.398	107.615	0.264428	-0.264428	1.06645	-1.06645	1.64743	-1.64743	0.493986	-0.493986	0.00741957	1
741	OG0004081	80.3273	61.6795	127.943	113.706	312.768	153.112	880.183	369.123	119.328	93.6109	0.220907	-0.220907	1.28494	-1.28494	1.53383	-1.53383	0.452838	-0.452838	0.00806224	1
203	OG0002809	118.659	121.837	233.427	227.088	50.3108	37.7005	345.868	294.04	104.372	92.872	0.16624	-0.16624	1.73041	-1.73041	0.978153	-0.978153	0.704131	-0.704131	0.00811468	1
14	OG0001237	827.119	940.938	329.05	292.047	225.692	218.642	527.063	425.945	491.625	459.571	0.886182	-0.886182	0.236022	-0.236022	1.57824	-1.57824	0.501258	-0.501258	0.00815296	1
932	OG0004498	394.918	423.054	451.681	69.8228	154.526	115.092	307.205	127.036	225.63	156.076	1.77698	-1.77698	0.354937	-0.354937	1.0069	-1.0069	0.442208	-0.442208	0.00830559	1
219	OG0002840	327.173	274.114	237.906	223.503	146.602	100.891	421.632	218.719	256.184	200.485	0.166508	-0.166508	0.985167	-0.985167	1.69025	-1.69025	0.650576	-0.650576	0.0083791	1
20	OG0001320	796.259	826.754	374.457	430.125	192.021	256.043	105.479	164.434	834.047	881.753	-0.539408	0.539408	-1.11397	1.11397	-1.70284	1.70284	-0.216763	0.216763	0.00838812	1
415	OG0003264	143.533	147.242	168.244	137.436	242.885	216.09	357.482	335.604	108.875	105.771	1.74948	-1.74948	1.01344	-1.01344	0.547943	-0.547943	0.251023	-0.251023	0.00839141	1
1435	OG0005653	716.034	631.105	1023.6	987.017	698.952	700.03	749.193	710.279	400.934	385.9	0.526147	-0.526147	-0.0222777	0.0222777	0.770954	-0.770954	0.552505	-0.552505	0.00870034	1
1507	OG0006462	244.454	217.608	140.774	87.9064	359.888	338.704	1077.75	936.807	148.115	109.825	1.68537	-1.68537	0.221066	-0.221066	0.510034	-0.510034	1.08219	-1.08219	0.00879493	1
1405	OG0005595	289.921	233.462	268.902	268.694	260.597	239.363	210.721	179.446	244.606	217.809	0.0053855	-0.0053855	0.591198	-0.591198	1.11579	-1.11579	0.806672	-0.806672	0.00895826	1
1238	OG0005198	243.844	231.726	144.784	127.156	225.146	185.065	196.187	116.347	145.379	126.96	0.473804	-0.473804	0.714156	-0.714156	1.8672	-1.8672	0.494344	-0.494344	0.00907186	1
532	OG0003575	227.939	191.115	231.837	227.267	146.876	122.57	328.981	212.689	129.622	94.348	0.0716609	-0.0716609	0.649323	-0.649323	1.54532	-1.54532	1.13364	-1.13364	0.00912135	1
1361	OG0005487	43.8345	54.0762	203.015	245	69.0956	105.187	165.795	194.687	181.244	190.903	-0.75295	0.75295	-1.66388	1.66388	-0.643983	0.643983	-0.208559	0.208559	0.0091682	1
1078	OG0004836	122.941	110.541	196.706	197.323	253.462	202.413	333.812	295.29	121.097	99.876	-0.0197256	0.0197256	1.41122	-1.41122	0.771678	-0.771678	1.21025	-1.21025	0.00939355	1
256	OG0002930	227.74	198.718	97.3974	87.689	561.829	552.973	376.515	328.934	218.875	210.438	1	-1	0.15145	-0.15145	1.28586	-1.28586	0.374685	-0.374685	0.00942252	1
1324	OG0005402	182.886	197.411	108.723	115.76	105.397	133.157	158.693	218.653	95.8468	102.085	-0.323645	0.323645	-1.20131	1.20131	-1.64036	1.64036	-0.325379	0.325379	0.00948685	1
388	OG0003210	170.445	132.259	144.4	102.336	93.7728	43.6635	2196.29	735.586	221.289	205.277	0.553088	-0.553088	1.18286	-1.18286	1.61635	-1.61635	0.121786	-0.121786	0.00996745	1
1446	OG0005858	337.426	366.103	895.076	963.291	118.936	137.225	54.9172	80.992	562.709	637.389	-0.352536	0.352536	-0.685697	0.685697	-1.84258	1.84258	-0.597643	0.597643	0.0100231	1
132	OG0002402	226.512	283.412	151.93	241.401	120.433	169.165	100.366	189.131	235.602	232.18	-1.11711	1.11711	-0.82642	0.82642	-1.50582	1.50582	0.0359295	-0.0359295	0.0102656	1
1421	OG0005629	434.877	663.902	251.114	290.175	1027.96	1119.33	343.043	417.642	1182.99	1187.63	-0.624498	0.624498	-0.368234	0.368234	-0.848693	0.848693	-0.0169299	0.0169299	0.0103467	1
1314	OG0005379	286.659	295.791	102.923	110.776	247.186	247.272	230.178	258.261	220.323	257.425	-0.745593	0.745593	-0.00353612	0.00353612	-1.16643	1.16643	-1.57555	1.57555	0.0103627	1
70	OG0001962	587.064	576.288	947.11	963.194	340.789	394.353	711.556	790.803	698.278	726.758	-0.19206	0.19206	-1.66213	1.66213	-1.2033	1.2033	-0.455904	0.455904	0.0103655	1
781	OG0004160	502.543	425.435	1080.6	1057.9	162.333	156.628	264.36	230.381	510.284	473.387	0.194076	-0.194076	0.327022	-0.327022	1.25574	-1.25574	0.685806	-0.685806	0.0104633	1
527	OG0003563	246.248	244.418	157.562	91.2941	452.46	435.609	315.869	206.857	141.037	118.349	1.61445	-1.61445	0.115037	-0.115037	1.26436	-1.26436	0.530297	-0.530297	0.0106441	1
103	OG0002180	315.348	286.016	324.609	312.149	77.108	76.2782	487.342	428.968	348.499	314.919	0.427884	-0.427884	0.118299	-0.118299	1.39298	-1.39298	1.1068	-1.1068	0.0106706	1
1549	OG0006844	114.174	114.236	118.88	114.566	196.926	158.713	225.16	141.212	106.302	87.893	0.144698	-0.144698	0.84147	-0.84147	1.7944	-1.7944	0.742367	-0.742367	0.0107037	1
275	OG0002967	428.714	425.185	176.63	170.011	166.133	164.149	156.561	138.449	120.452	111.852	0.543288	-0.543288	0.17097	-0.17097	1.74701	-1.74701	1.05345	-1.05345	0.0108241	1
1346	OG0005460	68.3003	57.1189	133.984	130.777	311.8	284.782	188.518	143.256	67.2226	50.4899	0.1161	-0.1161	0.434152	-0.434152	1.30786	-1.30786	1.36274	-1.36274	0.0108673	1
227	OG0002857	760.407	633.956	433.703	342.819	279.361	185.37	215.645	195.966	618.411	579.893	0.965361	-0.965361	1.66817	-1.66817	0.394347	-0.394347	0.265122	-0.265122	0.0108714	1
887	OG0004408	164.127	133.125	187.833	156.016	69.6123	47.7583	63.7698	57.033	222.253	211.538	0.816256	-0.816256	1.64251	-1.64251	0.491935	-0.491935	0.217887	-0.217887	0.0109797	1
1354	OG0005473	250.366	222.386	375.241	370.391	140.998	128.151	565.411	438.311	210.995	179.847	0.0821593	-0.0821593	0.602859	-0.602859	1.59933	-1.59933	1.00655	-1.00655	0.0109815	1
976	OG0004598	231.405	317.074	107.526	125.634	302.44	397.929	249.684	470.95	185.587	208.411	-0.430215	0.430215	-0.755259	0.755259	-1.70086	1.70086	-0.320891	0.320891	0.0111462	1
1031	OG0004718	185.942	185.901	103.685	102.677	154.523	115.165	131.045	101.905	174.168	155.892	0.0517662	-0.0517662	1.54723	-1.54723	1.3262	-1.3262	0.587025	-0.587025	0.0111666	1
1074	OG0004827	188.998	155.933	322.629	307.612	414.092	389.946	410.695	365.594	282.558	280.641	0.426476	-0.426476	0.53753	-0.53753	1.0399	-1.0399	0.0609343	-0.0609343	0.0111961	1
524	OG0003556	781.272	781.608	314.043	413.08	432.6	496.166	273.876	302.696	277.574	283.96	-1.7966	1.7966	-0.902775	0.902775	-0.659329	0.659329	-0.149989	0.149989	0.0113214	1
1378	OG0005525	225.087	193.936	743.627	728.938	93.6425	72.9931	310.778	246.633	309.418	286.724	0.112032	-0.112032	1.39177	-1.39177	1.29246	-1.29246	0.427565	-0.427565	0.0114007	1
247	OG0002915	340.892	323.806	435.249	486.323	250.605	261.697	289.214	373.569	498.542	534.568	-0.799632	0.799632	-0.312418	0.312418	-1.83637	1.83637	-0.503148	0.503148	0.0114601	1
291	OG0003001	587.992	618.726	865.47	806.993	860.799	723.979	1945.49	1252.07	455.603	398.023	0.300551	-0.300551	0.742109	-0.742109	1.86409	-1.86409	0.579824	-0.579824	0.0114726	1
287	OG0002995	390.841	320.763	265.538	279.006	1330.67	816.663	406.009	235.24	304.769	207.34	-0.125517	0.125517	1.21479	-1.21479	1.35149	-1.35149	0.96551	-0.96551	0.011488	1
333	OG0003091	239.124	295.139	216.374	229.463	63.9945	89.19	60.381	84.9097	219.713	234.798	-0.237944	0.237944	-1.33301	1.33301	-1.36824	1.36824	-0.268987	0.268987	0.0116486	1
1162	OG0005035	144.756	112.93	165.467	162.976	592.234	497.405	857.324	560.221	136.534	107.615	0.0565776	-0.0565776	0.649296	-0.649296	1.56371	-1.56371	0.883711	-0.883711	0.0116727	1
1147	OG0005003	1059.17	1360.6	924.841	1018.82	542.165	902.776	625.252	1427.63	1563.97	1897.79	-0.20842	0.20842	-1.07573	1.07573	-1.68472	1.68472	-0.415656	0.415656	0.0117794	1
1312	OG0005377	119.473	127.698	148.47	140.204	231.787	193.85	99.135	63.1999	78.1567	67.0742	0.23881	-0.23881	0.743353	-0.743353	1.84617	-1.84617	0.636417	-0.636417	0.0119459	1
756	OG0004108	671.176	661.945	585.412	558.3	66.2425	51.2383	395.164	351.303	552.732	521.664	0.345279	-0.345279	1.86029	-1.86029	0.855872	-0.855872	0.421192	-0.421192	0.0123247	1
340	OG0003109	138.024	158.102	310.073	231.495	313.515	300.815	88.7202	70.9739	204.4	192.932	1.55341	-1.55341	0.221328	-0.221328	1.18974	-1.18974	0.308999	-0.308999	0.012454	1
590	OG0003711	174.115	180.471	102.157	61.7951	211.131	212.966	162.763	105.49	91.0238	73.1551	1.51786	-1.51786	-0.0266698	0.0266698	1.31638	-1.31638	0.671045	-0.671045	0.0124756	1
373	OG0003178	475.456	526.429	264.442	190.314	465.904	421.38	769.597	567.358	752.314	737.075	1.47896	-1.47896	0.455292	-0.455292	1.37247	-1.37247	0.0928295	-0.0928295	0.0124912	1
72	OG0001969	521.125	444.335	542.173	493.16	112.274	53.6033	676.99	486.935	509.465	417.362	0.243415	-0.243415	1.81865	-1.81865	0.839594	-0.839594	0.510966	-0.510966	0.0127346	1
49	OG0001681	658.947	462.148	1128.78	1130.65	243.176	173.226	384.562	248.276	578.95	485.735	-0.00523025	0.00523025	1.05971	-1.05971	1.35855	-1.35855	0.552306	-0.552306	0.0127931	1
1103	OG0004903	310.917	292.83	1618.24	1481.37	230.5	157.313	186.812	157.851	177.866	166.58	0.433925	-0.433925	1.85458	-1.85458	0.825764	-0.825764	0.322012	-0.322012	0.0131192	1
1262	OG0005256	896.467	912.351	248.547	225.433	327.385	330.985	1351.3	1122.25	656.464	567.56	0.809395	-0.809395	-0.0907738	0.0907738	1.53691	-1.53691	1.20553	-1.20553	0.0131481	1
101	OG0002171	199.192	210.009	1052.45	1383.4	294.43	299.38	712.55	955	393.686	429.717	-1.40165	1.40165	-0.0860043	0.0860043	-1.49994	1.49994	-0.451432	0.451432	0.0132191	1
431	OG0003295	686.467	653.258	387.734	378.107	1280.24	1079.64	1343.86	1111.23	320.029	308.097	0.202524	-0.202524	1.36946	-1.36946	1.52657	-1.52657	0.306039	-0.306039	0.0132788	1
625	OG0003790	406.945	423.491	568.687	839.133	397.851	500.807	419.738	493.032	478.826	479.719	-1.70876	1.70876	-1.01907	1.01907	-0.71425	0.71425	-0.00828697	0.00828697	0.01348	1
1249	OG0005223	289.718	287.101	210.605	149.718	51.3906	47.6541	522.71	446.654	286.58	271.063	1.86536	-1.86536	0.416452	-0.416452	0.866104	-0.866104	0.307185	-0.307185	0.0137985	1
915	OG0004464	76.6594	74.7077	253.925	180.56	298.051	301.184	701.803	573.891	60.1465	50.8585	1.67446	-1.67446	-0.0518582	0.0518582	0.994317	-0.994317	0.829741	-0.829741	0.0139551	1
1462	OG0006061	543.956	588.104	585.752	568.574	2550.16	1559.84	1472.92	807.827	686.699	581.371	0.0810447	-0.0810447	1.31218	-1.31218	1.58805	-1.58805	0.452338	-0.452338	0.0140556	1
239	OG0002896	225.493	281.238	346.563	370.131	137.26	169.057	717.995	774.249	1673.97	1721.82	-0.43618	0.43618	-1.37684	1.37684	-0.500012	0.500012	-0.186907	0.186907	0.0144032	1
1341	OG0005441	266.269	309.907	169.989	170.89	215.409	290.427	298.021	377.96	548.879	604.959	-0.0267036	0.0267036	-1.49838	1.49838	-1.19478	1.19478	-0.491057	0.491057	0.0144775	1
959	OG0004561	377.183	223.255	438.157	439.435	298.584	183.283	447.102	189.902	302.257	216.956	-0.00552039	0.00552039	0.907281	-0.907281	1.53097	-1.53097	0.622944	-0.622944	0.0147286	1
505	OG0003487	247.716	274.944	307.684	64.975	335.995	231.539	126.262	82.9708	247.823	195.877	1.92095	-1.92095	0.542853	-0.542853	0.610254	-0.610254	0.345307	-0.345307	0.0152277	1
1348	OG0005463	402.258	365.72	647.903	624.301	454.336	373.199	352.274	274.95	564.636	544.698	0.236288	-0.236288	1.24874	-1.24874	1.57011	-1.57011	0.228908	-0.228908	0.0153101	1
1030	OG0004715	135.787	133.127	344.833	339.85	122.539	62.719	292.577	180.25	68.5091	56.2023	0.0373746	-0.0373746	1.65843	-1.65843	1.22014	-1.22014	0.506838	-0.506838	0.0154739	1
42	OG0001572	43.6327	63.1954	130.864	133.688	149.171	173.24	347.683	358.422	51.9447	61.9146	-0.104333	0.104333	-0.729542	0.729542	-0.14863	0.14863	-0.855713	0.855713	0.0154936	1
1371	OG0005513	652.498	734.735	270.157	254.689	63.4732	61.1167	441.564	381.58	268.569	263.139	0.620402	-0.620402	0.39815	-0.39815	1.53399	-1.53399	0.214957	-0.214957	0.0155534	1
1337	OG0005435	431.411	780.086	80.5346	117.47	2807.07	2685.58	1198.7	1821.6	912.167	1155.56	-0.947263	0.947263	0.112325	-0.112325	-1.04728	1.04728	-0.597739	0.597739	0.0155923	1
752	OG0004104	197.506	163.097	365.949	168.982	84.2431	68.1786	83.9376	62.7307	112.202	102.318	1.84711	-1.84711	0.528709	-0.528709	0.725334	-0.725334	0.231146	-0.231146	0.0156494	1
1338	OG0005437	574.742	654.344	416.016	442.608	617.269	684.107	374.337	505.566	995.145	1062.99	-0.372421	0.372421	-0.617585	0.617585	-1.79339	1.79339	-0.396391	0.396391	0.0157588	1
609	OG0003754	201.435	201.754	138.203	263.252	230.801	295.094	168.392	227.82	479.276	485.916	-1.80161	1.80161	-0.707111	0.707111	-0.867524	0.867524	-0.0397883	0.0397883	0.0158928	1
1118	OG0004941	337.654	329.526	1086.4	1092.01	488.314	394.056	286.28	241.708	340.616	314.917	-0.038434	0.038434	1.59324	-1.59324	1.25906	-1.25906	0.584691	-0.584691	0.0161647	1
371	OG0003175	259.745	296.01	555.428	553.774	251.892	213.995	650.296	572.15	417.003	397.474	0.0253811	-0.0253811	1.38428	-1.38428	1.08788	-1.08788	0.40806	-0.40806	0.0162156	1
978	OG0004600	264.432	229.772	414.229	417.055	166.403	137.166	107.468	79.2512	121.581	107.986	-0.0358072	0.0358072	1.0146	-1.0146	1.59193	-1.59193	0.623866	-0.623866	0.0163382	1
1581	OG0007553	134.766	152.239	158.03	156.886	81.9974	95.7007	449.281	503.102	109.84	117.011	0.0654964	-0.0654964	-1.38955	1.38955	-1.01829	1.01829	-0.569645	0.569645	0.0166579	1
829	OG0004275	387.581	424.355	486.394	473.756	317.534	233.802	685.565	635.651	563.992	480.944	0.153627	-0.153627	1.77258	-1.77258	0.440943	-0.440943	0.927625	-0.927625	0.0166663	1
372	OG0003176	476.469	456.716	599.361	486.346	785.064	642.787	528.246	388.281	775.166	804.378	1.04238	-1.04238	0.997824	-0.997824	1.52924	-1.52924	-0.185195	0.185195	0.0167133	1
41	OG0001562	167.996	165.625	172.035	155.717	207.357	210.631	144.772	124.423	270.177	246.921	1.03926	-1.03926	-0.163507	0.163507	1.57794	-1.57794	0.938773	-0.938773	0.0167399	1
948	OG0004539	806.759	904.311	1084.49	1082.43	1627.38	2136.65	1620.91	2107.81	897.373	981.786	0.00998972	-0.00998972	-1.42395	1.42395	-1.37431	1.37431	-0.472765	0.472765	0.0167918	1
487	OG0003437	738.765	763.287	227.846	171.098	275.079	249.737	617.865	602.176	605.97	546.73	1.88451	-1.88451	0.639728	-0.639728	0.170365	-0.170365	0.680858	-0.680858	0.0171755	1
421	OG0003277	167.183	161.143	87.8151	120.076	37.4509	48.9448	118.095	123.485	218.71	227.573	-1.58729	1.58729	-1.36079	1.36079	-0.22821	0.22821	-0.203146	0.203146	0.0171946	1
127	OG0002381	117.436	150.719	273.893	252.963	458.033	372.311	242.866	176.162	259.079	255.031	0.365906	-0.365906	0.950884	-0.950884	1.46621	-1.46621	0.0725128	-0.0725128	0.0173634	1
608	OG0003753	356.77	522.424	281.348	300.857	614.833	651.962	211.137	324.934	783.886	1001.05	-0.227822	0.227822	-0.199277	0.199277	-1.44329	1.44329	-0.827195	0.827195	0.0176837	1
799	OG0004207	1629.83	2118.52	206.095	226.78	686.262	872.322	1419.99	2120.08	1823.53	1867.21	-0.375739	0.375739	-0.938677	0.938677	-1.55503	1.55503	-0.0930452	0.0930452	0.0177136	1
926	OG0004488	109.077	96.6423	187.396	171.611	168.898	143.323	175.119	139.268	104.695	105.773	0.586081	-0.586081	1.09187	-1.09187	1.52004	-1.52004	-0.0682459	0.0682459	0.017748	1
889	OG0004414	645.487	922.552	225.231	217.636	104.941	173.664	337.269	452.15	613.042	783.88	0.101497	-0.101497	-1.45975	1.45975	-0.861201	0.861201	-0.723724	0.723724	0.0177825	1
57	OG0001771	282.987	262.348	631.69	428.772	99.0089	99.6577	160.017	93.4598	415.107	350.273	1.20126	-1.20126	-0.0205023	0.0205023	1.64842	-1.64842	0.531791	-0.531791	0.0178076	1
1481	OG0006293	140.882	115.319	144.928	147.66	848.489	761.183	554.759	457.814	88.4491	68.9187	-0.102232	0.102232	0.593731	-0.593731	1.04805	-1.04805	1.35856	-1.35856	0.0179022	1
255	OG0002929	543.346	469.532	846.068	875.79	288.8	239.622	95.7103	63.1312	231.902	168.423	-0.12828	0.12828	0.691613	-0.691613	1.52423	-1.52423	1.1784	-1.1784	0.0180641	1
63	OG0001819	384.926	352.043	358.029	348.991	177.734	172.748	350.05	291.904	412.274	333.685	0.184247	-0.184247	0.205052	-0.205052	1.30555	-1.30555	1.51853	-1.51853	0.0184109	1
1376	OG0005522	387.377	403.074	165.801	234.84	239.409	237.13	350.446	411.333	471.044	553.178	-1.76424	1.76424	0.0489657	-0.0489657	-0.818316	0.818316	-0.821014	0.821014	0.0185287	1
870	OG0004362	1361.92	1273.07	557.396	529.145	1224.75	813.252	738.355	612.663	889.089	820.179	0.239889	-0.239889	1.86293	-1.86293	0.858374	-0.858374	0.371965	-0.371965	0.0185608	1
1575	OG0007115	79.5179	70.3664	226.44	242.066	50.7041	29.4516	222.794	158.502	52.7472	37.591	-0.194949	0.194949	1.54974	-1.54974	0.985555	-0.985555	0.980623	-0.980623	0.0185972	1
1485	OG0006318	202.255	165.052	469.131	461.146	209.323	200.937	130.286	103.881	137.504	114.065	0.101555	-0.101555	0.241853	-0.241853	1.33413	-1.33413	1.10237	-1.10237	0.0185981	1
835	OG0004282	422.646	421.968	106.842	89.4997	251.764	238.736	55.2003	47.0819	322.926	323.578	1.53973	-1.53973	0.462974	-0.462974	1.38361	-1.38361	-0.0175826	0.0175826	0.0186081	1
583	OG0003697	832.038	538.374	1255.92	1220.12	161.393	111.59	1119.7	622.55	373.105	326.891	0.0754639	-0.0754639	0.952206	-0.952206	1.4893	-1.4893	0.344573	-0.344573	0.0186799	1
343	OG0003116	248.939	216.518	587.964	563.375	71.0854	31.6338	131.234	84.279	181.406	150.735	0.0991403	-0.0991403	1.78294	-1.78294	1.01142	-1.01142	0.428684	-0.428684	0.0190545	1
64	OG0001830	213.666	288.187	282.026	232.919	228.476	202.324	189.795	155.956	330.806	341.452	0.957266	-0.957266	0.609369	-0.609369	0.982439	-0.982439	-0.158967	0.158967	0.0191948	1
422	OG0003278	437.933	392.867	117.134	80.0182	229.427	103.993	116.037	107.969	163.875	139.676	0.922111	-0.922111	1.8427	-1.8427	0.176404	-0.176404	0.39047	-0.39047	0.0192596	1
1165	OG0005042	1784.98	1975.62	106.68	394.403	1528.85	1900.46	353.363	853.975	1166.43	1255.06	-1.69358	1.69358	-0.319605	0.319605	-1.22296	1.22296	-0.107961	0.107961	0.0196119	1
1219	OG0005159	304.397	286.013	110.109	87.4684	686.058	652.21	460.263	344.047	293.333	287.829	1.28641	-1.28641	0.283926	-0.283926	1.62205	-1.62205	0.106314	-0.106314	0.0201164	1
145	OG0002494	132.319	101.639	208.184	217.957	79.7121	64.0294	105.763	76.8385	101.477	83.6585	-0.192327	0.192327	0.915006	-0.915006	1.32845	-1.32845	0.807177	-0.807177	0.0202332	1
1440	OG0005791	307.455	337.705	517.377	510.296	581.852	557.325	266.159	263.315	616.741	566.445	0.216797	-0.216797	0.677453	-0.677453	0.169035	-0.169035	1.33753	-1.33753	0.0203253	1
418	OG0003270	331.301	332.271	295.615	251.473	140.318	135.764	250.301	167.482	180.76	162.71	0.774467	-0.774467	0.158324	-0.158324	1.90276	-1.90276	0.504405	-0.504405	0.0203952	1
350	OG0003134	359.445	361.814	354.04	300.14	380.299	300.842	488.762	497.055	466.219	425.296	1.16303	-1.16303	1.6466	-1.6466	-0.118748	0.118748	0.64793	-0.64793	0.0204222	1
556	OG0003629	591.862	600.051	897.803	889.003	513.415	308.458	1020.18	788.425	763.248	658.212	0.0360142	-0.0360142	1.82373	-1.82373	0.93711	-0.93711	0.540388	-0.540388	0.0205141	1
346	OG0003124	115.397	124.006	307.212	332.929	132.688	148.578	71.4402	101.669	198.13	209.332	-0.440968	0.440968	-0.620151	0.620151	-1.91679	1.91679	-0.301788	0.301788	0.020526	1
233	OG0002878	246.493	312.728	424.771	440.327	546.028	589.834	293.57	360.903	247.503	256.137	-0.233375	0.233375	-0.50051	0.50051	-1.33519	1.33519	-0.222483	0.222483	0.0213589	1
1382	OG0005530	95.6204	90.9979	111.655	113.392	72.5771	43.8442	141.365	89.1376	80.4098	69.8401	-0.0476687	0.0476687	1.52493	-1.52493	1.39999	-1.39999	0.434661	-0.434661	0.0216631	1
159	OG0002587	1055.9	646.092	2533.94	2590.37	672.621	392.855	514.091	384.293	648.103	535.119	-0.0589452	0.0589452	1.40559	-1.40559	0.77342	-0.77342	0.511158	-0.511158	0.0221741	1
1483	OG0006302	279.519	284.715	512.851	514.634	1430.64	1582.07	1059.42	1153.85	627.039	638.863	-0.0547486	0.0547486	-1.58568	1.58568	-1.34589	1.34589	-0.294669	0.294669	0.0222232	1
454	OG0003358	471.368	528.816	428.925	486.985	262.038	316.277	57.0774	92.2527	719.055	742.344	-0.501661	0.501661	-0.742212	0.742212	-1.86412	1.86412	-0.126115	0.126115	0.0223025	1
785	OG0004165	230.594	290.796	226.54	221.994	72.1628	143.673	83.1333	207.325	302.662	380.331	0.0380734	-0.0380734	-1.24447	1.24447	-1.60602	1.60602	-0.42714	0.42714	0.0224073	1
600	OG0003736	183.088	258.869	145.094	225.887	509.682	547.864	314.922	344.919	259.937	297.612	-1.58679	1.58679	-0.263056	0.263056	-0.331223	0.331223	-0.492334	0.492334	0.0225113	1
348	OG0003126	368.412	441.733	681.41	679.45	965.763	1005.28	682.63	780.917	561.259	608.273	0.0251776	-0.0251776	-0.350529	0.350529	-1.17416	1.17416	-0.702835	0.702835	0.0225935	1
1570	OG0007098	254.85	287.319	214.444	220.926	391.961	392.164	571.187	587.33	229.327	247.474	-0.427815	0.427815	-0.00744606	0.00744606	-0.400373	0.400373	-1.09356	1.09356	0.0231519	1
1152	OG0005014	294.405	359.859	636.278	582.127	353.828	275.757	614.41	427.053	471.364	473.207	0.385772	-0.385772	1.07634	-1.07634	1.56151	-1.56151	-0.0169355	0.0169355	0.0233691	1
404	OG0003249	141.29	92.7332	204.365	188.89	61.5766	45.7509	421.963	421.724	107.91	91.7645	0.309215	-0.309215	1.15866	-1.15866	0.00223178	-0.00223178	0.635374	-0.635374	0.0236759	1
522	OG0003554	93.1738	90.7808	156.968	157.522	194.751	182.14	134.972	105.557	74.4594	55.467	-0.0192415	0.0192415	0.36597	-0.36597	1.33758	-1.33758	1.59885	-1.59885	0.0237097	1
45	OG0001595	1141.53	1373.41	418.121	619.498	1612.72	2040.16	2165.02	2647.79	1349.43	1283.26	-1.54996	1.54996	-0.934521	0.934521	-0.80112	0.80112	0.200739	-0.200739	0.0237929	1
802	OG0004211	254.038	231.507	363.647	382.861	134.817	96.3838	319.94	253.37	298.322	249.501	-0.239719	0.239719	1.54828	-1.54828	1.08149	-1.08149	0.830034	-0.830034	0.0238153	1
1363	OG0005491	525.513	564.788	503.909	1066.13	134.293	135.985	259.342	560.053	855.24	986.029	-1.46382	1.46382	-0.0255841	0.0255841	-1.5002	1.5002	-0.290367	0.290367	0.023898	1
1153	OG0005015	413.879	511.663	654.584	715.008	381.987	447.441	84.3169	141.614	779.179	854.088	-0.319589	0.319589	-0.57166	0.57166	-1.8371	1.8371	-0.332245	0.332245	0.0243437	1
225	OG0002852	125.795	129.218	386.46	309.154	87.5151	81.0833	69.8779	50.1313	113.055	113.328	1.16341	-1.16341	0.39936	-0.39936	1.72252	-1.72252	-0.0126348	0.0126348	0.0244686	1
1267	OG0005269	406.666	520.261	209.568	242.556	75.5954	79.6455	94.8269	136.319	492.526	519.197	-0.666425	0.666425	-0.238294	0.238294	-1.63957	1.63957	-0.240782	0.240782	0.0245546	1
284	OG0002988	69.7275	62.3267	126.635	128.811	74.9577	57.7074	125.599	115.408	54.1962	45.5146	-0.105245	0.105245	1.60624	-1.60624	0.522374	-0.522374	1.07553	-1.07553	0.0245735	1
1010	OG0004667	374.322	344.646	403.901	357.729	94.8084	60.4962	104.649	98.4162	223.332	200.087	0.5333	-0.5333	1.9436	-1.9436	0.270036	-0.270036	0.482933	-0.482933	0.0245837	1
1583	OG0007621	60.7567	44.7356	113.064	117.788	114.75	92.4147	137.955	74.8617	63.6845	44.9618	-0.111097	0.111097	0.585278	-0.585278	1.60942	-1.60942	0.935501	-0.935501	0.0246959	1
266	OG0002955	171.464	117.057	217.314	108.268	68.3626	68.8542	580.134	417.635	93.1145	75.921	1.65355	-1.65355	-0.0176867	0.0176867	0.804061	-0.804061	0.502175	-0.502175	0.0248695	1
1509	OG0006473	404.503	364.63	1802.47	1671.1	633.643	605.212	375.804	249.18	80.7314	68.9187	0.352072	-0.352072	0.213647	-0.213647	1.88613	-1.88613	0.734847	-0.734847	0.024998	1
1223	OG0005170	416.326	420.665	520.282	447.093	759.654	620.49	409.997	232.358	333.89	323.408	0.527276	-0.527276	0.702733	-0.702733	1.9273	-1.9273	0.111141	-0.111141	0.025259	1
1441	OG0005792	302.36	327.066	340.263	354.926	1305.77	1506.67	293.95	312.515	287.706	288.198	-0.499419	0.499419	-1.69144	1.69144	-0.724852	0.724852	-0.0202196	0.0202196	0.0254666	1
120	OG0002350	3297.28	2890.71	2229.15	2007.34	1054.08	904.302	738.067	411.469	3629.76	3254.52	0.357356	-0.357356	0.521997	-0.521997	1.93915	-1.93915	0.372025	-0.372025	0.0255976	1
853	OG0004319	578.004	515.357	1062.43	956.188	315.998	241.306	725.663	389.62	509.96	482.597	0.328427	-0.328427	0.836335	-0.836335	1.88022	-1.88022	0.172034	-0.172034	0.025641	1
1102	OG0004902	271.778	287.536	47.2245	98.7248	147.588	161.578	66.8002	165.741	295.265	313.996	-1.34587	1.34587	-0.172591	0.172591	-1.62282	1.62282	-0.117261	0.117261	0.0257133	1
1358	OG0005482	72.3779	76.4473	280.355	213.882	738.174	510.331	620.47	94.7325	50.819	37.2225	0.363418	-0.363418	0.493105	-0.493105	1.98625	-1.98625	0.417285	-0.417285	0.0257646	1
1305	OG0005354	129.463	80.7886	245.249	230.852	56.6686	30.0677	58.9413	37.3972	84.5911	80.524	0.143729	-0.143729	1.45773	-1.45773	1.06294	-1.06294	0.117077	-0.117077	0.0264075	1
788	OG0004185	247.104	236.719	247.535	226.248	61.7209	40.9427	273.071	247.103	232.704	217.621	0.439383	-0.439383	1.97921	-1.97921	0.488187	-0.488187	0.327549	-0.327549	0.0266423	1
1347	OG0005461	853.405	1146.9	2003.61	2000.78	1044.17	1275.74	914.969	1222.11	1633.12	1729.92	0.00650527	-0.00650527	-0.919964	0.919964	-1.3246	1.3246	-0.26529	0.26529	0.0267304	1
724	OG0004046	1505.31	2144.03	915.777	934.535	641.73	891.916	666.912	1144.7	1722.38	1874.02	-0.0599492	0.0599492	-0.964681	0.964681	-1.55961	1.55961	-0.249348	0.249348	0.0269516	1
1452	OG0005937	182.064	203.275	185.412	245.937	303.899	312.024	356.867	456.172	156.64	159.762	-1.52879	1.52879	-0.143723	0.143723	-1.33076	1.33076	-0.107509	0.107509	0.0271884	1
644	OG0003856	298.482	359.422	293.167	343.543	38.0048	65.9182	193.679	243.653	286.58	286.539	-0.530638	0.530638	-1.80143	1.80143	-0.766394	0.766394	0.000478798	-0.000478798	0.0274223	1
1436	OG0005654	179.267	230.94	55.9698	110.221	348.999	397.549	50.9158	74.7598	585.028	589.226	-1.71695	1.71695	-0.342044	0.342044	-0.997885	0.997885	-0.0188071	0.0188071	0.0276053	1
58	OG0001783	301.194	322.201	170.758	140.901	774.262	700.797	435.267	344.616	329.357	341.638	1.2451	-1.2451	0.647309	-0.647309	1.51073	-1.51073	-0.237885	0.237885	0.0278137	1
864	OG0004353	175.748	188.939	143.985	148.481	79.0396	69.1957	158.501	129.081	173.203	157.551	-0.238762	0.238762	1.03125	-1.03125	1.5887	-1.5887	0.734875	-0.734875	0.0280896	1
723	OG0004045	692.384	671.286	492.144	382.351	505.698	458.557	576.022	375.699	421.506	425.11	1.0635	-1.0635	0.414125	-0.414125	1.78297	-1.78297	-0.0360592	0.0360592	0.0281435	1
1359	OG0005483	145.367	121.617	137.601	126.124	146.951	151.946	132.606	108.606	99.0648	80.3398	0.525314	-0.525314	-0.201753	0.201753	1.20111	-1.20111	1.25996	-1.25996	0.0282832	1
1559	OG0006956	1995.19	3330.36	1314.95	1213.45	567.442	1379.64	476.218	2147.96	2946.21	4210.2	0.103611	-0.103611	-1.07664	1.07664	-1.64425	1.64425	-0.455868	0.455868	0.0284377	1
1580	OG0007547	79.9215	96.6423	129.43	195.1	304.872	305.316	376.041	512.971	449.33	479.838	-1.57039	1.57039	-0.00565457	0.00565457	-1.19532	1.19532	-0.254814	0.254814	0.0285148	1
787	OG0004170	588.946	578.466	603.499	587.034	160.862	156.587	60.1239	46.5451	557.544	491.083	0.204039	-0.204039	0.198708	-0.198708	1.87805	-1.87805	0.935034	-0.935034	0.0288191	1
1366	OG0005500	633.872	811.795	910.377	856.736	254.06	319.713	250.821	329.538	771.614	903.288	0.277774	-0.277774	-1.04706	1.04706	-1.24119	1.24119	-0.719409	0.719409	0.028877	1
16	OG0001254	3542.03	3554.7	2742.54	2947.21	160.993	179.11	1028.23	1422.1	3431.08	3526	-0.439394	0.439394	-0.650693	0.650693	-1.96349	1.96349	-0.166658	0.166658	0.0289546	1
105	OG0002211	118.045	142.249	97.7753	52.531	327.766	286.484	229.8	201.361	316.174	285.618	1.91919	-1.91919	0.428498	-0.428498	0.420534	-0.420534	0.32373	-0.32373	0.0289658	1
504	OG0003485	699.112	708.853	580.627	550.331	538.809	517.169	330.817	244.464	329.36	299.989	0.35313	-0.35313	0.270143	-0.270143	1.97877	-1.97877	0.615202	-0.615202	0.0289689	1
683	OG0003948	198.171	102.289	158.949	175.612	280.19	197.56	262.94	140.306	125.278	89.9236	-0.20976	0.20976	0.728407	-0.728407	1.2808	-1.2808	0.691897	-0.691897	0.0289831	1
1139	OG0004989	236.908	232.595	362.779	245.039	397.541	319.93	518.871	371.459	209.065	227.942	1.46581	-1.46581	0.818552	-0.818552	1.25288	-1.25288	-0.326854	0.326854	0.0296174	1
614	OG0003765	330.082	307.086	260.606	272.37	217.773	233.544	316.674	311.442	191.214	201.775	-0.759312	0.759312	-1.20213	1.20213	0.286563	-0.286563	-0.92448	0.92448	0.0301259	1
994	OG0004639	123.756	150.716	96.6291	99.5555	73.5382	105.24	44.6912	59.5808	162.589	165.841	-0.127282	0.127282	-1.51311	1.51311	-1.21846	1.21846	-0.0845007	0.0845007	0.0302701	1
1150	OG0005011	661.632	582.54	705.141	621.585	83.8638	78.4112	416.425	391.598	687.013	699.796	1.32506	-1.32506	0.706956	-0.706956	0.646475	-0.646475	-0.193931	0.193931	0.0305225	1
1396	OG0005575	322.948	298.833	290.153	286.845	151.728	149.485	186.198	183.132	198.453	184.638	0.223421	-0.223421	0.290298	-0.290298	0.323616	-0.323616	1.4056	-1.4056	0.0308313	1
703	OG0003993	898.911	1273.94	162.312	166.202	1125.12	1383.94	934.146	1659.41	1464.1	1670.03	-0.0715831	0.0715831	-0.623713	0.623713	-1.69083	1.69083	-0.397284	0.397284	0.0308449	1
1447	OG0005875	276.459	291.664	123.661	147.855	55.4631	68.9333	148.886	144.961	130.907	140.043	-1.28326	1.28326	-1.55945	1.55945	0.192355	-0.192355	-0.485598	0.485598	0.0315113	1
1469	OG0006124	623.739	650.324	225.909	241.352	1132.48	1230.01	533.028	770.898	568.862	607.524	-0.36161	0.36161	-0.451681	0.451681	-1.99595	1.99595	-0.359584	0.359584	0.0316536	1
945	OG0004532	345.169	355.296	186.056	256.749	441.229	498.796	452.736	479.427	182.369	186.481	-1.94267	1.94267	-0.745181	0.745181	-0.348428	0.348428	-0.135643	0.135643	0.0320282	1
692	OG0003970	1218.37	1469.16	601.716	560.692	645.242	855.174	202.388	240.642	1299.74	1624.89	0.337025	-0.337025	-1.33614	1.33614	-0.824558	0.824558	-1.06168	1.06168	0.0323156	1
933	OG0004499	95.4186	98.1625	102.454	99.1012	175.465	168.098	268.621	197.91	143.61	128.436	0.214672	-0.214672	0.276737	-0.276737	1.95595	-1.95595	0.719811	-0.719811	0.0323562	1
658	OG0003889	208.11	183.861	279.499	279.467	186.626	154.884	353.837	238.994	173.687	160.13	0.000542244	-0.000542244	0.867629	-0.867629	1.80832	-1.80832	0.379083	-0.379083	0.0326551	1
555	OG0003627	534.174	549.886	1187.03	1081.13	844.779	828.588	751.229	652.473	781.584	780.935	1.14872	-1.14872	0.238077	-0.238077	1.73104	-1.73104	0.0102237	-0.0102237	0.0328511	1
963	OG0004576	198.377	187.423	139.915	91.8457	137.028	90.0609	402.031	353.028	201.024	213.016	1.45334	-1.45334	1.44922	-1.44922	0.454764	-0.454764	-0.20294	0.20294	0.0332706	1
547	OG0003613	415.92	442.381	610.845	623.6	499.047	432.306	350.05	334.396	387.736	335.924	-0.201419	0.201419	1.39695	-1.39695	0.445843	-0.445843	1.39571	-1.39571	0.0334019	1
1282	OG0005303	68.7101	89.0434	113.033	212.22	70.976	99.0819	133.126	201.261	105.498	92.5034	-1.51326	1.51326	-0.82012	0.82012	-1.0111	1.0111	0.325655	-0.325655	0.0334595	1
1401	OG0005585	123.35	115.971	113.364	117.431	446.889	392.092	344.036	285.303	149.241	137.277	-0.295751	0.295751	1.09602	-1.09602	1.56607	-1.56607	0.700665	-0.700665	0.0337751	1
396	OG0003231	123.96	108.152	126.75	115.731	92.3719	96.3431	432.283	344.42	73.9754	61.1794	0.566997	-0.566997	-0.262562	0.262562	1.41144	-1.41144	1.18127	-1.18127	0.033832	1
344	OG0003118	201.431	160.704	514.375	504.196	144.177	110.965	398.457	245.721	496.128	468.967	0.0720005	-0.0720005	0.93777	-0.93777	1.70817	-1.70817	0.202759	-0.202759	0.0339716	1
79	OG0002001	826.882	663.657	898.003	976.485	101.273	124.731	104.247	141.371	514.659	498	-0.40695	0.40695	-1.00883	1.00883	-1.46907	1.46907	0.1599	-0.1599	0.0348623	1
1006	OG0004663	898.3	983.145	502.113	521.358	1673.14	2306.82	736.932	1857.62	669.386	794.249	-0.0847354	0.0847354	-0.717509	0.717509	-1.94651	1.94651	-0.384446	0.384446	0.035087	1
671	OG0003916	230.89	229.268	136.795	144.808	215.125	148.038	308.862	222.171	245.091	217.989	-0.23673	0.23673	1.53677	-1.53677	1.35809	-1.35809	0.486865	-0.486865	0.0353005	1
616	OG0003771	1406.52	1821.41	1390.46	1417.5	4469.59	4766.11	2476.84	3404.47	2632.29	2917.36	-0.0961435	0.0961435	-0.3205	0.3205	-1.57446	1.57446	-0.512755	0.512755	0.0354026	1
455	OG0003360	267.898	297.311	453.505	449.163	436.396	464.231	292.34	308.1	666.298	679.614	0.152573	-0.152573	-0.980291	0.980291	-0.832493	0.832493	-0.313818	0.313818	0.0355576	1
1527	OG0006612	770.672	1087.61	558.761	520.8	45.091	225.277	205.513	599.696	439.198	554.283	0.0874517	-0.0874517	-1.65746	1.65746	-1.21749	1.21749	-0.288095	0.288095	0.0358694	1
3	OG0000716	1391.7	1041.78	1107.52	825.245	794.808	811.659	438.296	231.218	697.156	602.562	0.819067	-0.819067	-0.0588258	0.0588258	1.73458	-1.73458	0.408164	-0.408164	0.0359026	1
467	OG0003393	2122.9	2608.16	904.796	910.754	1818.61	2369.83	1563.44	2233.54	2396.94	2469.68	-0.0286056	0.0286056	-1.1472	1.1472	-1.53842	1.53842	-0.130287	0.130287	0.0360725	1
1542	OG0006766	245.269	268.861	219.241	213.839	102.204	118.825	331.977	372.928	203.112	213.937	0.241892	-0.241892	-1.45834	1.45834	-1.12666	1.12666	-0.503408	0.503408	0.0361585	1
383	OG0003201	344.238	310.897	506.686	569.346	993.443	1062.02	1665.51	2208.44	1175.7	1170.72	-0.755417	0.755417	-0.432795	0.432795	-1.81809	1.81809	0.0275487	-0.0275487	0.0362851	1
849	OG0004312	350.264	430.651	220.294	218.041	222.162	269.964	206.224	276.059	351.553	368.171	0.0534637	-0.0534637	-1.01075	1.01075	-1.50678	1.50678	-0.240264	0.240264	0.0364028	1
1197	OG0005118	458.527	465.84	224.363	163.898	84.5643	65.2128	219.666	237.25	184.14	156.996	1.49515	-1.49515	1.24043	-1.24043	-0.369468	0.369468	0.763921	-0.763921	0.0365005	1
254	OG0002927	767.271	918.81	610.605	702.207	318.344	385.539	632.589	1009.49	2171.24	2114.86	-0.540785	0.540785	-0.739885	0.739885	-1.77891	1.77891	0.101959	-0.101959	0.0365735	1
1408	OG0005600	817.771	979.885	870.246	817.5	685.462	878.794	419.312	601.338	805.222	922.823	0.268817	-0.268817	-1.06309	1.06309	-1.53402	1.53402	-0.585371	0.585371	0.0366457	1
537	OG0003585	99.696	121.615	72.5702	90.4082	109.46	168.177	236.333	255.011	158.407	157.366	-0.890556	0.890556	-1.72079	1.72079	-0.309293	0.309293	0.02682	-0.02682	0.0368402	1
514	OG0003530	255.671	333.142	141.864	161.656	271.821	286.158	80.7188	151.834	186.551	219.283	-0.395627	0.395627	-0.155891	0.155891	-1.85539	1.85539	-0.489351	0.489351	0.0370521	1
1561	OG0006998	790.243	578.987	183.223	169.927	905.032	462.27	179.192	113.766	115.468	116.088	0.18827	-0.18827	1.61926	-1.61926	1.11675	-1.11675	-0.0133822	0.0133822	0.0371577	1
1012	OG0004671	160.862	189.371	141.392	146.135	58.1813	33.2334	137.861	62.5625	161.461	143.917	-0.0736365	0.0736365	1.21825	-1.21825	1.67709	-1.67709	0.256464	-0.256464	0.037209	1
359	OG0003148	243.229	465.835	2340.56	2197.18	69.6518	193.862	87.1574	453.257	401.726	500.661	0.0752877	-0.0752877	-1.12307	1.12307	-1.61409	1.61409	-0.261224	0.261224	0.037265	1
611	OG0003758	198.377	187.206	438.626	398.692	1986.07	577.873	422.483	284.433	394.331	338.504	0.171324	-0.171324	1.97301	-1.97301	0.701527	-0.701527	0.273664	-0.273664	0.0373069	1
1234	OG0005191	169.831	216.954	516.921	571.218	391.661	498.885	327.751	502.047	440.002	426.218	-0.383455	0.383455	-0.925247	0.925247	-1.61412	1.61412	0.122287	-0.122287	0.0375251	1
1241	OG0005202	402.258	507.316	90.8353	131.443	465.194	529.278	469.614	774.118	201.344	189.415	-1.15933	1.15933	-0.408933	0.408933	-1.55369	1.55369	0.193742	-0.193742	0.0375758	1
182	OG0002764	283.805	234.33	681.875	701.408	210.145	127.285	47.1062	15.0463	245.25	197.533	-0.0508282	0.0508282	0.883915	-0.883915	1.85675	-1.85675	0.387905	-0.387905	0.0377107	1
584	OG0003698	135.377	123.789	95.6765	133.909	59.8801	87.0012	189.18	236.463	245.251	220.016	-1.25599	1.25599	-1.39264	1.39264	-0.837831	0.837831	0.409074	-0.409074	0.0378899	1
1237	OG0005197	461.384	512.747	797.051	800.386	845.919	969.515	1070.74	1109.25	296.067	386.966	-0.0277689	0.0277689	-0.905422	0.905422	-0.234923	0.234923	-1.76989	1.76989	0.0382674	1
195	OG0002790	313.772	287.101	171.108	152.284	212.488	167.014	394.93	308.76	318.424	338.876	0.653674	-0.653674	1.34571	-1.34571	1.37521	-1.37521	-0.349429	0.349429	0.0383335	1
690	OG0003967	328.861	521.217	275.789	285.547	247.349	310.09	364.868	1250.26	510.763	746.845	-0.0583171	0.0583171	-0.377552	0.377552	-1.83885	1.83885	-0.629705	0.629705	0.0385179	1
1355	OG0005475	68.7081	56.8995	100.455	108.833	58.7468	48.7186	46.4434	36.726	73.3337	60.0719	-0.411008	0.411008	0.958164	-0.958164	1.1997	-1.1997	1.02073	-1.02073	0.0387388	1
474	OG0003409	337.834	424.562	115.878	132.682	488.985	645.211	445.776	1109.45	1026.67	1098.98	-0.305936	0.305936	-0.623321	0.623321	-1.93111	1.93111	-0.153943	0.153943	0.0388185	1
784	OG0004164	1488.24	1753.83	1967.02	1972.3	1647.96	2415.1	808.041	1477.89	2087.89	2212.51	-0.00792376	0.00792376	-1.11485	1.11485	-1.73026	1.73026	-0.171113	0.171113	0.038934	1
501	OG0003471	338.031	331.622	340.316	340.47	115.66	107.93	725.76	523.862	277.574	245.081	-0.00270885	0.00270885	0.414796	-0.414796	1.93862	-1.93862	0.745978	-0.745978	0.039386	1
1211	OG0005145	477.896	444.774	976.579	1023.41	242.837	198.429	315.301	206.656	334.665	291.515	-0.202727	0.202727	0.871245	-0.871245	1.80203	-1.80203	0.59659	-0.59659	0.0394473	1
71	OG0001967	140.268	169.832	104.444	104.011	135.445	96.7469	139.045	119.899	156.64	148.52	0.0212352	-0.0212352	1.70408	-1.70408	0.755971	-0.755971	0.272073	-0.272073	0.0395031	1
686	OG0003959	119.884	108.802	212.823	207.2	379.562	384.571	396.163	364.054	72.6936	64.6768	0.322327	-0.322327	-0.157859	0.157859	1.01709	-1.01709	1.40531	-1.40531	0.0397244	1
923	OG0004485	541.305	455.415	675.301	439.091	494.365	531.433	622.317	412.307	529.418	468.784	1.4323	-1.4323	-0.244181	0.244181	1.37162	-1.37162	0.41046	-0.41046	0.0405842	1
390	OG0003216	925.826	1060.68	1582.44	1639.29	16538.4	20947.4	972.13	1067.08	952.212	960.044	-0.258673	0.258673	-1.72427	1.72427	-0.682616	0.682616	-0.0600369	0.0600369	0.0408325	1
921	OG0004481	65.0382	82.7432	192.118	233.591	32.5244	87.1693	50.2777	108.673	154.065	138.387	-0.339693	0.339693	-1.5919	1.5919	-1.28101	1.28101	0.186934	-0.186934	0.0408522	1
294	OG0003005	1061.2	981.406	312.094	260.082	308.348	264.756	118.923	126.098	586.186	519.458	1.36099	-1.36099	1.13883	-1.13883	-0.438425	0.438425	0.903582	-0.903582	0.0410061	1
657	OG0003888	1781.92	2265.99	1398.31	1483.01	1953.9	2570.24	919.769	1852.33	1521.35	1609.41	-0.162265	0.162265	-0.752	0.752	-1.85697	1.85697	-0.15526	0.15526	0.0415153	1
586	OG0003704	393.691	429.78	522.221	515.18	42.5218	70.0429	49.0463	66.1156	506.905	540.096	0.0494703	-0.0494703	-1.7819	1.7819	-1.08026	1.08026	-0.231049	0.231049	0.0415677	1
1455	OG0005954	314.997	221.732	207.079	275.086	67.5201	70.5664	186.466	194.605	157.971	167.499	-1.31351	1.31351	-0.205443	0.205443	-0.19889	0.19889	-0.272622	0.272622	0.0416147	1
24	OG0001351	298.892	211.095	446.971	443.783	406.322	399.099	1022.31	858.252	171.112	157.919	0.0384719	-0.0384719	0.0963906	-0.0963906	0.937716	-0.937716	0.430979	-0.430979	0.0419424	1
150	OG0002522	362.911	203.057	364.719	397.151	122.706	62.8066	355.732	163.764	294.141	254.847	-0.157793	0.157793	1.19685	-1.19685	1.36974	-1.36974	0.265307	-0.265307	0.0419852	1
141	OG0002469	483.811	423.489	699.778	755.714	162.261	245.592	257.408	417.324	898.016	859.799	-0.252448	0.252448	-1.34213	1.34213	-1.55686	1.55686	0.142816	-0.142816	0.0420005	1
1024	OG0004700	360.259	333.581	289.375	176.553	781.227	570.596	147.755	130.596	290.601	309.391	1.72017	-1.72017	1.10687	-1.10687	0.437924	-0.437924	-0.222471	0.222471	0.0426477	1
1218	OG0005158	112.337	114.883	271.978	238.997	77.2267	74.1233	284.417	149.505	83.3061	71.3106	0.417807	-0.417807	0.132728	-0.132728	2.01255	-2.01255	0.502193	-0.502193	0.0427436	1
208	OG0002815	361.337	335.079	831.114	797.91	757.311	581.454	376.07	255.114	235.761	238.814	0.182946	-0.182946	1.17903	-1.17903	1.72005	-1.72005	-0.0577265	0.0577265	0.0431013	1
1345	OG0005457	1005.95	1434.22	114.963	104.361	553.021	806.672	204.756	454.195	490.339	623.937	0.215885	-0.215885	-0.833154	0.833154	-1.6906	1.6906	-0.535474	0.535474	0.0434707	1
417	OG0003269	116.414	100.988	130.873	129.953	102.465	80.925	81.098	76.1679	109.198	103.375	0.0521508	-0.0521508	1.73697	-1.73697	0.463608	-0.463608	0.405085	-0.405085	0.0436419	1
1422	OG0005631	98.6786	109.019	101.764	104.838	104.292	85.8209	121.528	75.1958	59.0208	52.3308	-0.118284	0.118284	0.772298	-0.772298	1.87213	-1.87213	0.477576	-0.477576	0.0437249	1
1166	OG0005043	235.075	254.743	219.253	257.752	50.8507	54.6753	73.7585	93.0573	212.119	203.434	-1.12258	1.12258	-0.504108	0.504108	-1.60912	1.60912	0.290714	-0.290714	0.0441966	1
90	OG0002060	1609.65	1477.43	3174.59	3128.75	787.645	723.915	1671.04	1270.7	2550.6	2439.74	0.102437	-0.102437	0.593903	-0.593903	1.917	-1.917	0.312926	-0.312926	0.0442463	1
1367	OG0005502	1137.25	1745.43	479.547	493.407	92.7233	101.359	323.632	530.921	646.813	739.473	-0.0911077	0.0911077	-0.284599	0.284599	-1.55147	1.55147	-0.42751	0.42751	0.044308	1
420	OG0003274	390.641	345.738	530.029	537.329	141.449	120.269	366.855	281.618	598.088	576.768	-0.0868215	0.0868215	1.0274	-1.0274	1.6687	-1.6687	0.230378	-0.230378	0.0444842	1
772	OG0004147	182.678	169.615	165.429	151.103	235.043	235.048	240.926	222.674	211.315	210.618	1.36105	-1.36105	-0.000352009	0.000352009	1.18394	-1.18394	0.049659	-0.049659	0.0445266	1
368	OG0003166	166.918	156.061	115.941	89.6943	61.0134	57.4092	426.035	196.569	113.786	105.388	0.686279	-0.686279	0.163649	-0.163649	1.9817	-1.9817	0.206041	-0.206041	0.044613	1
1278	OG0005289	247.308	223.033	157.843	130.641	169.859	164.448	179.286	182.294	172.077	151.84	1.59185	-1.59185	0.273261	-0.273261	-0.140439	0.140439	1.05472	-1.05472	0.0446488	1
847	OG0004309	296.238	282.326	325.43	315.108	264.442	257.711	167.592	167.683	307.971	276.957	0.553444	-0.553444	0.442685	-0.442685	-0.00934839	0.00934839	1.8209	-1.8209	0.0446771	1
1368	OG0005503	925.283	1035.22	730.702	732.277	551.394	640.155	405.67	424.236	256.187	264.613	-0.0234757	0.0234757	-1.62495	1.62495	-0.487999	0.487999	-0.352928	0.352928	0.0448007	1
1416	OG0005623	212.646	300.783	170.392	179.132	198.516	243.241	136.204	307.454	343.993	396.364	-0.120326	0.120326	-0.48718	0.48718	-1.85741	1.85741	-0.34039	0.34039	0.0449284	1
1173	OG0005060	259.237	265.501	457.54	501.33	1155.15	448.382	280.268	164.97	296.228	244.895	-0.185565	0.185565	1.79094	-1.79094	1.05222	-1.05222	0.385465	-0.385465	0.0451208	1
1307	OG0005360	330.696	368.327	315.458	352.966	648.707	747.418	691.246	1050.84	619.155	607.167	-0.513445	0.513445	-0.646936	0.646936	-1.88871	1.88871	0.0894476	-0.0894476	0.0452298	1
1466	OG0006107	403.685	469.091	323.753	449.098	405.856	403.794	165.318	312.648	344.475	368.536	-0.961343	0.961343	0.0151004	-0.0151004	-1.82709	1.82709	-0.200021	0.200021	0.0454428	1
783	OG0004163	440.992	361.377	455.223	409.949	376.865	402.947	230.274	154.615	202.475	149.811	0.406182	-0.406182	-0.259615	0.259615	1.52579	-1.52579	1.16035	-1.16035	0.0455071	1
826	OG0004265	1813.63	1455.72	2955.72	2985.03	2318.08	2074.58	888.996	693.179	1235.45	1179.98	-0.0595121	0.0595121	0.668658	-0.668658	1.49292	-1.49292	0.276998	-0.276998	0.0455342	1
866	OG0004357	553.13	518.174	694.806	638.351	1940.5	1932.34	743.656	549.464	503.042	469.888	0.551045	-0.551045	0.0274044	-0.0274044	1.95415	-1.95415	0.443425	-0.443425	0.0457864	1
717	OG0004032	353.533	388.96	397.239	404.54	309.582	329.139	224.593	314.66	598.892	654.528	-0.106073	0.106073	-0.356679	0.356679	-1.94557	1.94557	-0.517055	0.517055	0.0464411	1
1530	OG0006620	349.453	256.558	891.047	848.673	137.912	109.699	366.13	223.378	163.915	162.793	0.167	-0.167	0.781214	-0.781214	1.66031	-1.66031	0.0235505	-0.0235505	0.0465632	1
6	OG0001054	545.212	542.122	560.785	547.661	300.203	280.333	234.758	180.82	422.473	407.232	0.184646	-0.184646	0.533776	-0.533776	2.0241	-2.0241	0.286455	-0.286455	0.0466155	1
1037	OG0004740	506.234	607.215	331.583	352.684	908.594	1046.89	1597.62	1886.71	921.335	884.86	-0.446429	0.446429	-1.02389	1.02389	-1.20121	1.20121	0.292366	-0.292366	0.046669	1
1477	OG0006264	72.5818	52.9904	87.5496	90.9404	2698.44	2455.9	291.157	182.192	63.0413	49.751	-0.131585	0.131585	0.32593	-0.32593	1.59452	-1.59452	0.816162	-0.816162	0.0468635	1
1019	OG0004691	1806.14	1728.89	437.576	498.371	228.992	249.385	46.254	45.4734	1934.67	1990.31	-1.67253	1.67253	-1.09762	1.09762	0.219121	-0.219121	-0.365027	0.365027	0.0471738	1
1521	OG0006568	141.698	165.489	135.143	138.354	224.478	217.737	253.472	209.907	138.303	115.906	-0.164359	0.164359	0.213351	-0.213351	1.3159	-1.3159	1.23321	-1.23321	0.047373	1
125	OG0002368	248.124	253.442	129.302	119.735	47.3367	48.1409	269.237	170.297	64.487	52.7011	0.326108	-0.326108	-0.0715057	0.0715057	1.9109	-1.9109	0.853761	-0.853761	0.047432	1
975	OG0004597	219.882	200.44	181.88	130.129	155.771	134.716	136.913	113.799	90.863	97.8472	1.66283	-1.66283	0.726644	-0.726644	0.924282	-0.924282	-0.371034	0.371034	0.048114	1
763	OG0004127	298.277	299.048	239.408	318.265	306.412	295.82	514.707	743.486	218.393	229.416	-1.29114	1.29114	0.160589	-0.160589	-1.66028	1.66028	-0.224759	0.224759	0.0481162	1
173	OG0002661	467.869	502.796	612.619	664.021	356.853	356.923	171.19	218.25	789.14	825.529	-0.636162	0.636162	-0.00154872	0.00154872	-1.90926	1.90926	-0.356074	0.356074	0.0483709	1
1097	OG0004887	784.944	749.903	863.599	947.855	1095.16	1093.13	637.182	696.435	433.891	435.061	-1.44518	1.44518	0.0288143	-0.0288143	-1.38047	1.38047	-0.0418288	0.0418288	0.0485041	1
1177	OG0005071	433.86	355.945	952.814	984.185	905.257	836.752	743.513	557.2	448.042	393.6	-0.180468	0.180468	0.438198	-0.438198	1.5961	-1.5961	0.720777	-0.720777	0.0486943	1
470	OG0003402	635.295	720.582	212.279	141.352	217.978	219.265	686.275	622.649	91.6671	81.6315	1.90448	-1.90448	-0.0279536	0.0279536	0.461571	-0.461571	0.54988	-0.54988	0.0487555	1
678	OG0003940	388.596	370.715	268.455	275.547	474.58	438.992	306.259	265.868	264.064	251.53	-0.312787	0.312787	0.934642	-0.934642	1.69386	-1.69386	0.583278	-0.583278	0.0489858	1
135	OG0002426	325.898	332.241	363.688	344.672	183.599	159.544	378.22	229.235	250.235	239.182	0.221013	-0.221013	0.577136	-0.577136	2.01921	-2.01921	0.185933	-0.185933	0.0492316	1
384	OG0003206	182.274	192.631	326.995	307.856	642.06	526.794	338.026	190.137	153.423	149.072	0.213169	-0.213169	0.697283	-0.697283	1.97986	-1.97986	0.101704	-0.101704	0.0492983	1
1188	OG0005098	2801.51	3042.52	1289.28	1191.08	224.568	356.707	209.064	276.193	1879.96	2147.39	0.299749	-0.299749	-1.72125	1.72125	-1.04745	1.04745	-0.502798	0.502798	0.0493324	1
1360	OG0005485	385.13	536.632	663.988	725.459	889.207	917.924	973.124	1404.68	496.612	523.328	-0.374353	0.374353	-0.134465	0.134465	-1.53572	1.53572	-0.221638	0.221638	0.0496965	1
1110	OG0004923	203.27	186.772	159.601	199.708	235.273	223.803	128.582	214.23	105.176	119.038	-0.831389	0.831389	0.186095	-0.186095	-1.86087	1.86087	-0.460498	0.460498	0.0498326	1
803	OG0004218	122.533	127.917	131.819	138.078	498.94	281.077	910.677	349.075	134.122	122.724	-0.0930136	0.0930136	1.12027	-1.12027	1.78808	-1.78808	0.177995	-0.177995	0.0502899	1
572	OG0003663	310.514	325.109	136.62	126.582	70.8922	57.4002	277.143	194.659	372.296	390.099	0.385032	-0.385032	1.06172	-1.06172	1.76499	-1.76499	-0.235755	0.235755	0.0505002	1
279	OG0002977	213.26	183.729	339.107	293.03	116.823	109.934	270.927	282.931	212.121	184.64	1.18465	-1.18465	0.493767	-0.493767	-0.352231	0.352231	1.12568	-1.12568	0.0516274	1
705	OG0004002	422.85	375.057	357.498	315.433	659.051	576.228	641.632	647.782	484.872	480.574	1.20883	-1.20883	1.29658	-1.29658	-0.0922434	0.0922434	0.0861054	-0.0861054	0.0516946	1
1134	OG0004981	135.377	178.517	121.531	144.721	239.911	252.883	158.739	172.175	92.632	90.2922	-1.08534	1.08534	-0.328017	0.328017	-0.505954	0.505954	0.1594	-0.1594	0.0517904	1
1572	OG0007108	157.6	130.087	207.485	173.016	71.9161	77.4602	156.561	104.786	88.2899	75.5506	0.759469	-0.759469	-0.311161	0.311161	1.6609	-1.6609	0.65187	-0.65187	0.0518032	1
812	OG0004241	1614.02	2467.99	138.9	142.835	599.255	724.361	184.494	763.223	1029.41	1510.09	-0.0436122	0.0436122	-0.295106	0.295106	-1.9066	1.9066	-0.590984	0.590984	0.0519357	1
610	OG0003757	401.445	428.052	874.996	853.342	433.815	570.08	87.4893	189.734	624.79	717.364	0.0663618	-0.0663618	-0.718966	0.718966	-1.95355	1.95355	-0.36534	0.36534	0.0519435	1
1475	OG0006246	178.598	181.342	146.002	160.481	87.9666	99.7427	165.462	183.468	103.246	98.2158	-1.02752	1.02752	-1.36455	1.36455	-1.12239	1.12239	0.543097	-0.543097	0.05201	1
448	OG0003338	196.544	194.588	179.75	246.359	53.3617	67.1978	264.076	256.284	284.009	294.647	-1.69677	1.69677	-1.24571	1.24571	0.162546	-0.162546	-0.199556	0.199556	0.0520121	1
482	OG0003427	528.911	581.116	668.561	692.952	429.682	419.256	188.961	211.453	915.917	989.151	-0.444292	0.444292	0.304553	-0.304553	-1.39306	1.39306	-0.953354	0.953354	0.0524721	1
1226	OG0005173	366.373	337.49	191.309	185.528	168.177	159.606	205.827	209.672	423.92	386.963	0.471415	-0.471415	0.803486	-0.803486	-0.284344	0.284344	1.4005	-1.4005	0.0528234	1
851	OG0004317	110.712	123.357	149.632	91.1708	80.3544	84.8584	838.577	647.948	135.568	122.91	1.8046	-1.8046	-0.202639	0.202639	0.953214	-0.953214	0.36401	-0.36401	0.05287	1
357	OG0003145	1015.53	1108.02	1185.2	1125.97	670.924	666.128	563.611	556.546	1495.62	1490.19	1.06431	-1.06431	0.148963	-0.148963	0.261899	-0.261899	0.0755471	-0.0755471	0.0535498	1
811	OG0004240	117.232	126.614	184.644	154.504	123.986	84.7596	233.113	179.045	138.948	155.339	0.739434	-0.739434	1.56353	-1.56353	1.09148	-1.09148	-0.463432	0.463432	0.0537851	1
740	OG0004077	303.376	333.796	161.375	174.573	122.546	161.567	83.512	85.283	208.422	214.306	-0.549635	0.549635	-1.92153	1.92153	-0.146787	0.146787	-0.194726	0.194726	0.0539659	1
1535	OG0006668	330.492	309.69	336.996	336.693	223.989	251.365	231.646	267.176	490.337	489.789	0.00982423	-0.00982423	-1.25696	1.25696	-1.55461	1.55461	0.0122053	-0.0122053	0.054379	1
461	OG0003371	1007.26	1049.15	1326.69	1299.96	2126.5	2249.05	2298	2365.84	1879.23	1991.4	0.444874	-0.444874	-1.22439	1.22439	-0.63592	0.63592	-1.26699	1.26699	0.0548811	1
229	OG0002862	113.564	107.499	93.1965	64.4169	164.3	155.448	73.9953	51.7063	573.482	608.088	1.49467	-1.49467	0.226604	-0.226604	1.45145	-1.45145	-0.239742	0.239742	0.0555871	1
604	OG0003745	111.527	101.418	1392.82	1444.67	168.023	157.144	238.674	214.866	116.274	108.535	-0.443278	0.443278	0.811556	-0.811556	1.27334	-1.27334	0.835075	-0.835075	0.055645	1
453	OG0003353	1835.54	2241.88	1094.3	1009.37	1979.48	2533.64	1378.56	3014.9	1667.67	2105.84	0.202513	-0.202513	-0.615931	0.615931	-1.86827	1.86827	-0.582477	0.582477	0.0558692	1
18	OG0001302	437.126	307.737	860.151	812.107	675.108	615.391	421.68	318.881	326.729	331.037	0.26611	-0.26611	0.428608	-0.428608	1.28573	-1.28573	-0.0606625	0.0606625	0.0560384	1
283	OG0002986	104.387	122.486	146.324	143.582	174.867	174.039	385.414	281.853	92.3104	80.3416	0.106727	-0.106727	0.0267687	-0.0267687	1.75103	-1.75103	0.782126	-0.782126	0.0561439	1
1002	OG0004657	49.7471	49.7306	188.742	188.16	403.266	387.514	297.689	194.627	121.74	103.189	0.0145082	-0.0145082	0.187072	-0.187072	1.96593	-1.96593	0.774531	-0.774531	0.0564774	1
1306	OG0005355	967.825	739.476	1709.7	1686.68	459.73	350.325	847.903	839.024	868.075	776.104	0.0725126	-0.0725126	1.44462	-1.44462	0.0562951	-0.0562951	0.598323	-0.598323	0.0565681	1
1260	OG0005248	191.039	210.585	83.4112	103.988	298.523	360.82	241.399	255.68	70.7606	67.2585	-1.47844	1.47844	-1.27218	1.27218	-0.38684	0.38684	0.341656	-0.341656	0.0567728	1
647	OG0003864	658.939	671.718	201.932	193.371	893.901	1163.55	568.582	799.95	910.29	949.057	0.212461	-0.212461	-1.28575	1.28575	-1.65861	1.65861	-0.204551	0.204551	0.0567987	1
597	OG0003732	351.494	366.372	660.45	673.12	39.2312	50.6973	799.377	1156.4	401.245	392.126	-0.0899252	0.0899252	-1.20679	1.20679	-1.72779	1.72779	0.108785	-0.108785	0.0581326	1
642	OG0003848	882.395	911.044	182.024	313.632	916.411	984.127	505.807	621.845	734.947	723.445	-1.9589	1.9589	-0.26286	0.26286	-0.759161	0.759161	0.0581843	-0.0581843	0.0582546	1
1496	OG0006402	121.309	140.729	103.432	117.996	72.6771	91.6735	83.3222	93.4929	120.293	112.405	-0.83932	0.83932	-1.47492	1.47492	-0.73401	0.73401	0.432582	-0.432582	0.0588857	1
1092	OG0004874	687.484	711.244	678.103	723.275	70.2034	67.3819	168.427	210.563	405.746	454.595	-0.519389	0.519389	0.330419	-0.330419	-1.79141	1.79141	-0.914866	0.914866	0.0591818	1
1473	OG0006185	302.766	273.202	250.971	242.68	275.065	282.162	247.269	214.13	361.037	279.171	0.227209	-0.227209	-0.172287	0.172287	0.971617	-0.971617	1.72988	-1.72988	0.0594918	1
567	OG0003653	468.724	471.921	443.673	170.251	118.403	82.4196	651.006	640.255	591.174	558.704	1.96428	-1.96428	0.790275	-0.790275	0.0367188	-0.0367188	0.124542	-0.124542	0.0596445	1
927	OG0004489	425.095	495.593	893.973	833.111	1277.31	1555.64	852.542	1031.81	491.305	538.434	0.447528	-0.447528	-1.2477	1.2477	-1.20813	1.20813	-0.581224	0.581224	0.0599167	1
1025	OG0004704	2152.78	1824.91	3967.24	4319.8	1971.5	2221.59	502.019	733.065	1925.49	1876.97	-0.414873	0.414873	-0.581635	0.581635	-1.82427	1.82427	0.12444	-0.12444	0.0599241	1
1302	OG0005350	104.151	90.7808	216.642	216.805	265.47	263.207	43.5763	36.861	180.953	167.275	-0.00692423	0.00692423	0.0789567	-0.0789567	1.53938	-1.53938	0.724263	-0.724263	0.0604651	1
670	OG0003915	711.75	1266.34	98.7123	111.977	532.644	689.92	97.5926	408.935	594.95	674.829	-0.19259	0.19259	-0.393529	0.393529	-1.88028	1.88028	-0.192438	0.192438	0.0607414	1
1000	OG0004653	162.084	168.527	115.494	107.084	307.992	291.935	257.022	156.659	103.084	96.1888	0.320417	-0.320417	0.226959	-0.226959	2.05729	-2.05729	0.293402	-0.293402	0.0607564	1
782	OG0004162	306.842	341.619	128.843	101.399	63.4849	36.1733	151.921	135.749	137.501	146.312	0.814766	-0.814766	1.87325	-1.87325	0.384271	-0.384271	-0.212214	0.212214	0.0611474	1
253	OG0002924	591.87	608.951	399.872	376.945	916.379	842.261	467.98	420.515	524.272	545.619	0.801499	-0.801499	1.14455	-1.14455	1.45078	-1.45078	-0.54187	0.54187	0.0611796	1
792	OG0004196	506.24	548.798	460.42	511.305	167.323	172.256	152.916	197.073	426.011	421.793	-0.775401	0.775401	-0.215125	0.215125	-1.86823	1.86823	0.0736601	-0.0736601	0.0613013	1
539	OG0003591	227.942	319.026	490.132	481.816	277.395	415.954	409.465	716.243	364.216	363.295	0.0481653	-0.0481653	-1.12495	1.12495	-1.53407	1.53407	0.00712492	-0.00712492	0.0613048	1
821	OG0004256	209.998	192.416	224.982	218.908	155.892	86.694	194.009	164.333	191.859	181.876	0.0962028	-0.0962028	2.00552	-2.00552	0.582236	-0.582236	0.187805	-0.187805	0.061323	1
984	OG0004613	156.785	125.096	504.349	460.721	266.457	256.844	317.573	188.929	172.238	158.841	0.336615	-0.336615	0.136792	-0.136792	1.89117	-1.89117	0.301304	-0.301304	0.0614544	1
1200	OG0005124	275.163	304.986	460.429	415.884	264.63	267.597	599.166	364.053	378.653	334.391	0.411436	-0.411436	-0.0451199	0.0451199	1.97564	-1.97564	0.502425	-0.502425	0.0615279	1
691	OG0003969	78.4964	77.531	117.746	129.47	79.121	65.0925	93.4535	61.4249	53.5545	45.5146	-0.406987	0.406987	0.834807	-0.834807	1.77471	-1.77471	0.696452	-0.696452	0.061632	1
675	OG0003930	344.558	313.818	492.312	504.007	373.341	342.997	319.372	216.038	344.638	306.807	-0.117734	0.117734	0.424863	-0.424863	1.93574	-1.93574	0.582448	-0.582448	0.0620226	1
1456	OG0005978	117.026	98.5947	109.975	127.416	416.315	318.898	425.64	238.892	103.084	79.236	-0.438464	0.438464	0.790769	-0.790769	1.67714	-1.67714	0.780628	-0.780628	0.0622428	1
494	OG0003453	152.503	149.635	367.733	439.678	584.582	254.42	407.382	107.735	183.978	154.418	-0.264972	0.264972	1.17019	-1.17019	1.72979	-1.72979	0.259755	-0.259755	0.062245	1
251	OG0002919	699.315	629.591	878.969	842.852	257.563	257.426	858.507	548.125	370.044	315.654	0.184489	-0.184489	0.00234322	-0.00234322	1.9407	-1.9407	0.697635	-0.697635	0.0623125	1
73	OG0001970	360.206	405.945	780.035	705.854	537.771	502.496	1023.83	956.878	772.418	803.232	1.13337	-1.13337	0.769819	-0.769819	0.767353	-0.767353	-0.44397	0.44397	0.0623302	1
300	OG0003024	108.063	112.544	184.226	147.355	204.855	137.324	206.697	201.261	125.922	128.987	1.03392	-1.03392	1.83507	-1.83507	0.123907	-0.123907	-0.111813	0.111813	0.062554	1
65	OG0001920	71.9702	75.5786	115.235	106.697	280.655	295.381	323.112	289.828	111.123	99.1371	0.863548	-0.863548	-0.573858	0.573858	1.219	-1.219	1.27969	-1.27969	0.0632961	1
871	OG0004366	379.428	378.317	293.114	335.483	60.4037	82.986	299.108	292.844	356.214	371.304	-0.827022	0.827022	-1.93238	1.93238	0.129856	-0.129856	-0.254498	0.254498	0.0636262	1
697	OG0003981	870.782	812.232	648.097	637.546	98.7692	100.291	285.097	236.078	747.582	672.658	0.152886	-0.152886	-0.142402	0.142402	1.75224	-1.75224	0.982819	-0.982819	0.0637189	1
815	OG0004248	852.225	921.685	698.626	710.186	1230.39	1450.18	530.803	1193.73	601.787	688.8	-0.0434291	0.0434291	-0.433971	0.433971	-2.03457	2.03457	-0.356846	0.356846	0.0638226	1
1209	OG0005142	513.102	531.995	277.694	270.17	121.138	193.882	26.1804	61.7928	976.807	998.854	0.0624168	-0.0624168	-1.04955	1.04955	-1.8399	1.8399	-0.0507222	0.0507222	0.0641684	1
681	OG0003946	71.3585	63.1975	189.585	207.995	110.545	115.613	95.7259	115.683	71.8863	69.654	-0.78938	0.78938	-0.382054	0.382054	-1.60923	1.60923	0.268866	-0.268866	0.0645939	1
1438	OG0005657	400.015	457.585	287.573	277.938	336.509	384.034	219.29	394.111	280.791	327.265	0.116513	-0.116513	-0.45107	0.45107	-1.9491	1.9491	-0.522699	0.522699	0.0648696	1
109	OG0002254	500.729	345.53	1179.85	1248.39	388.712	350.668	328.366	221	615.616	527.933	-0.210189	0.210189	0.383157	-0.383157	1.45533	-1.45533	0.570972	-0.570972	0.0649234	1
1410	OG0005606	329.269	323.806	197.459	160.043	134.635	139.582	239.932	141.412	281.597	261.663	0.787715	-0.787715	-0.135769	0.135769	1.94444	-1.94444	0.276163	-0.276163	0.0649552	1
751	OG0004103	97.0476	112.062	97.1194	82.0138	105.457	89.0894	78.1145	66.1833	138.305	151.47	1.06438	-1.06438	1.06195	-1.06195	1.04366	-1.04366	-0.573443	0.573443	0.065216	1
113	OG0002286	236.904	251.919	218.676	229.661	664.306	623.326	621.56	545.664	183.164	143.841	-0.356612	0.356612	0.463184	-0.463184	0.946323	-0.946323	1.75012	-1.75012	0.0657876	1
712	OG0004020	322.337	357.907	664.116	647.982	567.931	618.214	359.876	544.476	475.934	535.449	0.116877	-0.116877	-0.402924	0.402924	-1.94014	1.94014	-0.559308	0.559308	0.0660697	1
1325	OG0005404	137.622	124.006	239.945	258.343	69.2469	60.4421	487.627	303.332	97.4566	81.6315	-0.29439	0.29439	0.541341	-0.541341	1.85786	-1.85786	0.704586	-0.704586	0.0661356	1
234	OG0002879	1370.04	1551.23	1079.39	1226.69	701.135	674.915	526.4	806.721	1147.13	1268.88	-0.577547	0.577547	0.172285	-0.172285	-1.90122	1.90122	-0.455665	0.455665	0.0662279	1
472	OG0003407	68.5042	72.536	65.6302	153.887	250.882	272.203	67.5572	76.1348	142.163	158.105	-2.06546	2.06546	-0.209403	0.209403	-0.306669	0.306669	-0.272761	0.272761	0.0666052	1
865	OG0004355	411.843	350.09	529.167	527.562	145.931	173.038	913.331	1126.71	359.917	355.456	0.0204769	-0.0204769	-1.14539	1.14539	-1.40973	1.40973	0.0840471	-0.0840471	0.0669207	1
21	OG0001324	300.723	132.257	454.005	496.122	259.65	103.477	113.353	31.7343	164.195	162.159	-0.116206	0.116206	1.12744	-1.12744	1.47471	-1.47471	0.0163535	-0.0163535	0.0675721	1
969	OG0004583	465.459	610.041	1334.61	1276.2	167.746	221.798	107.467	287.789	272.107	317.683	0.094561	-0.094561	-0.586438	0.586438	-1.92813	1.92813	-0.326595	0.326595	0.067981	1
1239	OG0005199	683.415	663.466	1089.96	1084.71	554.92	556.754	596.703	613.3	528.294	539.91	0.221454	-0.221454	-0.151415	0.151415	-1.25874	1.25874	-0.998006	0.998006	0.0683154	1
510	OG0003502	183.811	174.834	156.278	154.261	113.212	44.2045	148.764	127.169	201.827	170.081	0.0303475	-0.0303475	2.04763	-2.04763	0.365551	-0.365551	0.398713	-0.398713	0.0685378	1
478	OG0003422	141.902	122.49	255.762	272.497	157.397	143.346	146.997	122.412	140.231	125.305	-0.474424	0.474424	0.699711	-0.699711	1.36666	-1.36666	0.841814	-0.841814	0.0686321	1
122	OG0002356	611.848	539.24	870.258	870.248	82.1766	67.6717	458.937	436.837	839.155	816.313	0.000103556	-0.000103556	1.72635	-1.72635	0.440014	-0.440014	0.246075	-0.246075	0.0686616	1
1551	OG0006852	2978.63	3392.99	3671.42	3577.46	665.96	875.409	472.288	669.463	5501.09	5497.3	0.119791	-0.119791	-1.25583	1.25583	-1.59603	1.59603	0.00318538	-0.00318538	0.0686844	1
655	OG0003882	234.466	214.565	250.855	259.245	477.128	235.627	185.583	145.266	144.255	132.49	-0.0954174	0.0954174	1.96574	-1.96574	0.706983	-0.706983	0.246641	-0.246641	0.068759	1
954	OG0004554	234.464	266.033	357.07	320.839	65.6026	24.1659	205.514	161.72	391.111	384.389	0.234273	-0.234273	2.02336	-2.02336	0.522732	-0.522732	0.0380003	-0.0380003	0.0690682	1
402	OG0003246	457.916	623.503	219.894	195.509	195.016	247.632	144.49	220.394	511.729	598.51	0.41415	-0.41415	-0.838636	0.838636	-1.46765	1.46765	-0.551465	0.551465	0.0695036	1
1599	OG0008131	262.395	222.822	454.208	558.193	933.958	644.815	1623.84	998.399	206.494	151.836	-0.602224	0.602224	1.07382	-1.07382	1.39847	-1.39847	0.894341	-0.894341	0.0697644	1
362	OG0003153	534.377	586.588	242.347	256.347	851.679	766.535	642.634	554.959	610.633	565.153	-0.530913	0.530913	0.995081	-0.995081	1.38452	-1.38452	0.731523	-0.731523	0.0699185	1
328	OG0003078	1182.31	1069.58	490.326	1247.57	89.0487	119.786	1079.69	1165.98	923.033	914.446	-1.991	1.991	-0.67254	0.67254	-0.175574	0.175574	0.0213545	-0.0213545	0.0701912	1
1543	OG0006781	188.384	147.676	186.73	164.047	714.649	931.059	535.347	837.717	931.307	1101.01	0.45321	-0.45321	-0.921611	0.921611	-1.54337	1.54337	-0.585227	0.585227	0.0702518	1
961	OG0004563	227.328	140.729	323.822	360.114	348.615	302.438	432.567	352.324	160.176	121.251	-0.369535	0.369535	0.493939	-0.493939	0.711962	-0.711962	0.963204	-0.963204	0.0703053	1
245	OG0002911	232.627	195.456	216.645	205.331	123.158	91.2841	59.6997	61.5572	285.935	255.77	0.309894	-0.309894	1.71791	-1.71791	-0.17705	0.17705	0.643612	-0.643612	0.0706041	1
582	OG0003693	211.423	188.07	249.625	318.285	59.6613	76.0775	110.072	104.953	110.647	113.51	-1.40354	1.40354	-1.40399	1.40399	0.27635	-0.27635	-0.148281	0.148281	0.0710351	1
191	OG0002784	330.286	385.485	215.968	208.034	169.417	212.313	130.902	193.655	148.436	152.207	0.167034	-0.167034	-1.00316	1.00316	-1.72606	1.72606	-0.111956	0.111956	0.07116	1
958	OG0004560	705.942	771.683	977.978	970.092	814.275	1075.02	835.925	1079.22	737.679	721.967	0.044464	-0.044464	-1.51595	1.51595	-1.39538	1.39538	0.118237	-0.118237	0.0715088	1
202	OG0002804	112.135	113.58	195.685	220.391	162.128	195.239	68.4576	127.874	104.373	99.3214	-0.389925	0.389925	-0.608419	0.608419	-1.98733	1.98733	0.162872	-0.162872	0.0716809	1
764	OG0004128	90.3215	63.1975	132.297	96.1062	63.0008	70.2727	114.427	82.569	100.995	91.0293	1.13214	-1.13214	-0.389857	0.389857	1.15548	-1.15548	0.370801	-0.370801	0.0717551	1
99	OG0002149	369.437	433.477	202.094	210.13	54.7813	149.491	91.9863	120.402	276.404	291.279	-0.0843659	0.0843659	-2.00641	2.00641	-0.578986	0.578986	-0.113394	0.113394	0.0720406	1
535	OG0003581	79.5117	70.7964	120.669	95.8531	365.743	358.468	257.021	134.374	233.669	231.074	0.717503	-0.717503	0.0628882	-0.0628882	1.9617	-1.9617	0.034954	-0.034954	0.0723338	1
485	OG0003435	1278.74	1320.2	491.341	402.687	1489.76	1074.5	3288.4	3165.12	1692.95	1778.2	1.08946	-1.08946	1.77919	-1.77919	0.209879	-0.209879	-0.269824	0.269824	0.0723718	1
352	OG0003137	207.755	217.172	183.195	161.094	288.57	266.143	402.22	391.598	175.776	180.769	1.67344	-1.67344	1.05399	-1.05399	0.348828	-0.348828	-0.365064	0.365064	0.07246	1
882	OG0004399	138.234	163.315	149.176	142.404	10.8399	75.4914	39.957	83.7754	121.58	126.774	0.0591343	-0.0591343	-1.90677	1.90677	-0.901696	0.901696	-0.0532535	0.0532535	0.0726042	1
606	OG0003748	424.277	417.627	359.749	388.529	43.8786	55.7045	446.533	452.921	386.61	387.886	-0.651207	0.651207	-2.01067	2.01067	-0.120259	0.120259	-0.0278919	0.0278919	0.0727457	1
1471	OG0006170	476.679	482.553	180.499	127.867	356.521	312.725	269.807	241.909	376.802	403.182	1.86803	-1.86803	0.716201	-0.716201	0.596673	-0.596673	-0.370163	0.370163	0.0732294	1
81	OG0002005	202.25	237.156	653.931	621.354	406.333	569.636	73.0839	196.032	264.387	292.622	0.109199	-0.109199	-0.715279	0.715279	-1.95299	1.95299	-0.216692	0.216692	0.0732452	1
1204	OG0005131	149.651	140.079	178.885	148.384	150.048	131.692	74.5648	76.4373	170.953	168.979	1.6585	-1.6585	1.15946	-1.15946	-0.220681	0.220681	0.103325	-0.103325	0.0734289	1
401	OG0003244	248.529	238.24	376.953	341.466	431.744	407.993	296.135	270.762	245.571	256.688	1.33291	-1.33291	0.763198	-0.763198	1.2078	-1.2078	-0.597241	0.597241	0.0735025	1
710	OG0004017	252.407	236.068	236.613	82.2279	125.613	106.154	311.418	264.962	148.115	145.02	2.05748	-2.05748	0.356764	-0.356764	0.342481	-0.342481	0.0448564	-0.0448564	0.0738218	1
35	OG0001496	356.587	397.423	525.588	517.221	463.73	424.17	767.656	566.185	400.6	396.733	0.102049	-0.102049	0.566653	-0.566653	1.921	-1.921	0.0616818	-0.0616818	0.0744671	1
1544	OG0006785	237.746	155.136	111.927	103.722	400.86	438.086	284.67	162.624	89.2548	65.2315	0.21105	-0.21105	-0.246127	0.246127	1.51347	-1.51347	0.862557	-0.862557	0.0745693	1
699	OG0003983	194.909	169.613	212.807	207.479	272.303	237.113	265.969	264.662	195.235	191.641	0.271063	-0.271063	1.47722	-1.47722	0.0526914	-0.0526914	0.198674	-0.198674	0.0751671	1
895	OG0004429	357.402	526.427	250.752	230.32	87.0613	159.643	233.16	398.433	656.626	668.531	0.204824	-0.204824	-1.41883	1.41883	-1.26195	1.26195	-0.0433236	0.0433236	0.0752799	1
897	OG0004433	106.632	113.582	87.3684	88.4224	215.192	273.396	198.933	219.557	116.753	115.723	-0.0956711	0.0956711	-1.90098	1.90098	-0.786439	0.786439	0.070709	-0.070709	0.0760291	1
66	OG0001923	704.612	628.718	994.229	1047.73	285.31	257.915	208.117	125.495	302.662	258.899	-0.204482	0.204482	0.393584	-0.393584	1.93287	-1.93287	0.608221	-0.608221	0.076044	1
1193	OG0005109	777.4	728.62	939.305	875.904	1178.08	1037.91	959.682	1012.67	614.972	558.337	0.767415	-0.767415	1.38975	-1.38975	-0.590297	0.590297	1.06055	-1.06055	0.0764791	1
1257	OG0005242	408.576	460.843	122.962	94.4448	286.527	303.765	41.0927	39.3411	120.454	100.058	1.58804	-1.58804	-0.353565	0.353565	0.263659	-0.263659	1.11977	-1.11977	0.0767597	1
1222	OG0005169	123.346	130.956	187.289	178.496	497.844	594.054	241.163	442.868	161.624	179.479	0.162128	-0.162128	-0.594266	0.594266	-1.98877	1.98877	-0.353038	0.353038	0.0768308	1
952	OG0004549	461.794	591.579	374.526	360.974	448.769	511.459	238.842	459.381	405.104	466.389	0.110775	-0.110775	-0.392516	0.392516	-1.899	1.899	-0.422783	0.422783	0.0780017	1
1508	OG0006463	203.881	212.179	24.2619	128.347	175.468	188.53	170.811	253.737	115.951	119.96	-2.03535	2.03535	-0.10709	0.10709	-0.582897	0.582897	-0.0507096	0.0507096	0.078187	1
386	OG0003208	420.811	491.903	198.38	171.754	52.496	85.3944	56.5259	119.386	586.174	646.833	0.342714	-0.342714	-1.13661	1.13661	-1.70237	1.70237	-0.234368	0.234368	0.0787296	1
80	OG0002002	234.058	236.936	314.955	304.384	222.907	196.133	1162.82	1020.65	249.914	260.924	0.379236	-0.379236	1.41961	-1.41961	1.44675	-1.44675	-0.478903	0.478903	0.0788752	1
1413	OG0005612	412.248	654.998	145.965	119.953	442.858	711.646	224.402	877.795	1022.81	1329.14	0.298306	-0.298306	-0.709978	0.709978	-1.80778	1.80778	-0.397183	0.397183	0.0793913	1
1524	OG0006588	136.397	137.905	189.217	195.24	215.243	199.631	430.247	303.434	120.293	110.193	-0.181614	0.181614	0.436245	-0.436245	2.00365	-2.00365	0.507958	-0.507958	0.0795872	1
1131	OG0004971	693.195	932.112	444.529	419.096	40.7509	56.6867	588.222	845.757	1030.21	1040.94	0.218817	-0.218817	-1.21524	1.21524	-1.33446	1.33446	-0.0385072	0.0385072	0.0801059	1
648	OG0003866	410.617	470.615	93.5526	61.4933	1104.51	770.398	1574.75	1457.39	462.197	517.982	1.51448	-1.51448	1.3052	-1.3052	0.283483	-0.283483	-0.416854	0.416854	0.0801327	1
1458	OG0005992	253.219	296.876	341.847	318.058	658.264	703.823	886.061	1059.72	288.51	347.901	0.479908	-0.479908	-0.445274	0.445274	-1.18814	1.18814	-1.24236	1.24236	0.0802523	1
911	OG0004458	269.327	234.33	210.34	228.944	103.168	78.3235	248.027	210.846	284.811	259.085	-0.486076	0.486076	1.57107	-1.57107	0.929943	-0.929943	0.542861	-0.542861	0.0806435	1
1369	OG0005509	909.719	1342.13	0	197.501	335.376	403.753	933.261	2269.42	1308.26	1090.88	-1.91452	1.91452	-0.177112	0.177112	-0.79874	0.79874	0.173472	-0.173472	0.0808834	1
197	OG0002797	160.251	161.143	394.787	417.399	66.6824	49.3851	389.202	355.341	194.59	176.529	-0.356607	0.356607	1.90883	-1.90883	0.582526	-0.582526	0.623364	-0.623364	0.0809042	1
264	OG0002953	580.343	575.499	323.163	387.712	848.342	1096.94	361.317	451.808	792.356	694.513	-0.94772	0.94772	-1.33381	1.33381	-1.16153	1.16153	0.686822	-0.686822	0.0811525	1
709	OG0004016	413.266	414.802	392.404	291.894	162.554	156.316	575.92	407.315	288.51	311.971	1.3548	-1.3548	0.180459	-0.180459	1.58171	-1.58171	-0.360369	0.360369	0.0811726	1
1399	OG0005582	105.205	76.0064	271.147	295.061	202.358	183.168	160.302	103.009	110.967	91.7682	-0.30457	0.30457	0.358944	-0.358944	1.56906	-1.56906	0.6829	-0.6829	0.0811792	1
39	OG0001538	1517.29	1440.3	605.267	561.029	194.599	155.012	1061.47	961.101	1931.76	2046.13	0.595982	-0.595982	1.77918	-1.77918	0.779704	-0.779704	-0.451759	0.451759	0.0814507	1
438	OG0003309	392.47	487.772	346.731	365.887	1163.44	741.368	451.788	411.872	326.144	284.699	-0.218214	0.218214	1.79881	-1.79881	0.375195	-0.375195	0.550798	-0.550798	0.0815529	1
997	OG0004645	231.807	184.161	102.557	88.0687	209.125	211.157	814.886	683.806	236.437	240.144	0.988002	-0.988002	-0.0628242	0.0628242	1.13696	-1.13696	-0.101117	0.101117	0.0816895	1
1290	OG0005318	92.9679	67.7582	249.703	298.313	2162.39	3163	231.362	843.613	94.7227	84.5798	-0.299257	0.299257	-0.633902	0.633902	-1.9215	1.9215	0.190847	-0.190847	0.0820473	1
1082	OG0004842	1539.31	1389.26	626.477	688.218	799.977	838.125	119.823	222.339	1027.56	1082.2	-0.321843	0.321843	-0.159599	0.159599	-2.05333	2.05333	-0.177513	0.177513	0.08213	1
1488	OG0006340	174.525	214.568	166.922	156.821	389.969	380.952	429.962	369.984	91.8263	93.797	0.501273	-0.501273	0.18789	-0.18789	1.20452	-1.20452	-0.170553	0.170553	0.0821336	1
1281	OG0005300	240.782	257.351	367.155	374.901	194.171	321.915	1366.54	1646.28	226.756	223.149	-0.0830068	0.0830068	-1.96824	1.96824	-0.738316	0.738316	0.0637453	-0.0637453	0.0825704	1
1433	OG0005647	700.129	537.946	751.594	810.585	89.3512	55.9334	329.171	195.196	479.89	480.021	-0.2166	0.2166	1.31936	-1.31936	1.46553	-1.46553	-0.000780388	0.000780388	0.0828305	1
1594	OG0007976	152.505	135.299	433.4	499.494	204.092	132.786	432.331	188.661	152.619	136.726	-0.327664	0.327664	0.978941	-0.978941	1.81475	-1.81475	0.254034	-0.254034	0.0831363	1
902	OG0004443	186.144	182.209	203.818	166.633	56.0124	52.4073	406.245	408.387	168.217	166.211	1.99972	-1.99972	0.662419	-0.662419	-0.0523756	0.0523756	0.119492	-0.119492	0.0831918	1
1135	OG0004983	214.889	226.516	343.065	313.074	253.183	239.157	236.096	137.658	129.78	127.144	0.358712	-0.358712	0.223574	-0.223574	2.06691	-2.06691	0.0805007	-0.0805007	0.0832433	1
144	OG0002491	900.137	890.629	287.676	360.02	982.503	417.346	997.126	299.915	1361.18	1224.66	-0.346634	0.346634	1.25293	-1.25293	1.6682	-1.6682	0.163845	-0.163845	0.083893	1
452	OG0003352	158.824	154.845	191.793	193.812	176.731	174.685	379.78	253.235	166.125	142.993	-0.051903	0.051903	0.0577289	-0.0577289	1.98187	-1.98187	0.741866	-0.741866	0.0845045	1
738	OG0004075	135.377	170.477	90.4699	115.841	57.5762	78.835	496.622	437.576	130.909	149.443	-1.05672	1.05672	-1.33913	1.33913	0.543114	-0.543114	-0.568071	0.568071	0.0845336	1
814	OG0004243	320.096	365.503	567.409	597.472	953.169	1002.44	2062.43	2006.06	450.134	466.016	-0.696427	0.696427	-0.67986	0.67986	0.373845	-0.373845	-0.467817	0.467817	0.0852671	1
1284	OG0005305	199.396	172.87	346.375	362.451	399.512	362.166	590.264	562.936	235.763	214.86	-0.464887	0.464887	1.0051	-1.0051	0.485779	-0.485779	0.950869	-0.950869	0.0857689	1
964	OG0004577	361.076	293.619	465.614	453.556	356.97	346.821	421.44	299.38	221.45	211.177	0.138731	-0.138731	0.152503	-0.152503	1.79082	-1.79082	0.25113	-0.25113	0.0867857	1
775	OG0004152	275.242	251.485	306.206	304.572	398.852	363.123	283.817	277.429	376.478	375.724	0.085867	-0.085867	1.50455	-1.50455	0.365211	-0.365211	0.0321773	-0.0321773	0.0868714	1
953	OG0004550	1341.2	1552.97	135.271	142.414	74.241	78.1778	191.595	90.7119	127.369	73.3394	-0.119977	0.119977	-0.120472	0.120472	1.66677	-1.66677	1.25558	-1.25558	0.0871049	1
1585	OG0007641	162.899	178.517	121.819	136.278	136.183	97.3491	111.492	58.1901	79.4448	73.5273	-0.325795	0.325795	0.967062	-0.967062	1.82682	-1.82682	0.224966	-0.224966	0.0875392	1
771	OG0004145	540.49	508.621	982.438	905.146	1171.26	563.442	788.143	784.93	443.379	388.809	0.241216	-0.241216	2.06408	-2.06408	0.0120336	-0.0120336	0.38629	-0.38629	0.087723	1
856	OG0004331	533.625	632.705	223.017	39.769	3099.84	3221.43	1135.36	765.022	386.128	345.874	2.02268	-2.02268	-0.0557929	0.0557929	0.565256	-0.565256	0.159507	-0.159507	0.0882335	1
940	OG0004519	315.199	310.12	116.328	131.128	105.502	90.9546	121.528	58.3409	88.4523	68.5502	-0.329123	0.329123	0.407474	-0.407474	1.93315	-1.93315	0.697563	-0.697563	0.0882843	1
236	OG0002886	485.444	431.961	929.436	1023.41	191.844	122.389	907.933	686.085	555.31	524.056	-0.37331	0.37331	1.71465	-1.71465	1.07965	-1.07965	0.224624	-0.224624	0.0885632	1
296	OG0003015	707.061	632.193	1360.69	1357.38	475.797	334.138	368.182	350.314	1025.39	972.023	0.0138299	-0.0138299	1.9818	-1.9818	0.28179	-0.28179	0.302724	-0.302724	0.0892447	1
913	OG0004462	236.912	183.946	150.803	161.175	502.843	445.521	184.649	170.911	151.172	133.411	-0.437517	0.437517	0.795403	-0.795403	0.508452	-0.508452	0.821279	-0.821279	0.0896749	1
134	OG0002417	801.321	738.362	789.458	849.341	596.853	497.373	442.367	416.026	976.818	827.008	-0.560708	0.560708	1.39504	-1.39504	0.470865	-0.470865	1.27439	-1.27439	0.089724	1
475	OG0003410	565.363	590.5	226.584	227.28	79.6586	51.5588	301.902	247.237	210.03	214.857	-0.0136944	0.0136944	1.9133	-1.9133	0.889412	-0.889412	-0.101489	0.101489	0.0899654	1
529	OG0003569	190.833	214.35	153.62	160.841	179.277	173.669	229.09	189.399	124.151	110.744	-0.380356	0.380356	0.263185	-0.263185	1.57099	-1.57099	0.945398	-0.945398	0.0911248	1
1459	OG0006004	340.482	315.336	497.734	396.943	93.6215	239.531	130.428	177.704	91.6655	126.409	0.473345	-0.473345	-1.84019	1.84019	-0.644644	0.644644	-0.66941	0.66941	0.0915717	1
29	OG0001448	265.046	196.977	543.875	586.748	455.01	626.968	224.356	220.363	248.44	259.196	-0.363645	0.363645	-1.5241	1.5241	0.0861046	-0.0861046	-0.203179	0.203179	0.0917253	1
325	OG0003075	774.896	980.58	1378.94	1377.12	72.6073	89.651	481.994	1071.08	677.533	698.014	0.00341901	-0.00341901	-0.542254	0.542254	-1.95811	1.95811	-0.0768648	0.0768648	0.0921088	1
446	OG0003333	216.318	234.548	332.239	300.879	188.083	187.764	407.286	342.373	241.549	246.553	0.971745	-0.971745	0.0166354	-0.0166354	1.69877	-1.69877	-0.201111	0.201111	0.092873	1
162	OG0002612	424.479	521.653	4487.42	4304.13	989.552	1314.76	902.956	1476.15	839.959	826.634	0.148239	-0.148239	-1.00348	1.00348	-1.71305	1.71305	0.0568472	-0.0568472	0.0937593	1
558	OG0003637	104.795	127.915	124.445	89.3893	249.367	180.358	141.79	170.264	161.786	131.019	1.21518	-1.21518	1.19034	-1.19034	-0.676364	0.676364	0.778856	-0.778856	0.0938548	1
904	OG0004446	1373.96	1745.64	1265.42	1079.16	594.403	753.009	331.681	479.697	2708.02	3262.76	0.610197	-0.610197	-0.90415	0.90415	-1.4012	1.4012	-0.713642	0.713642	0.0945458	1
140	OG0002468	489.725	392.869	162.315	143.838	51.7141	34.4897	121.433	124.423	498.777	483.38	0.541005	-0.541005	1.79109	-1.79109	-0.10901	0.10901	0.140524	-0.140524	0.0949099	1
111	OG0002267	568.619	559.872	410.972	410.374	491.265	493.207	405.866	461.502	459.949	477.445	0.0229516	-0.0229516	-0.0621892	0.0621892	-2.02228	2.02228	-0.588442	0.588442	0.0949209	1
432	OG0003298	530.836	415.901	463.609	525.878	397.523	314.584	651.716	469.375	431.963	385.306	-0.536232	0.536232	0.992447	-0.992447	1.38591	-1.38591	0.486453	-0.486453	0.0950033	1
426	OG0003287	189.814	175.044	203.662	210.977	144.81	131.856	119.775	100.28	232.545	227.575	-0.340137	0.340137	0.902639	-0.902639	1.70797	-1.70797	0.208242	-0.208242	0.0952557	1
480	OG0003424	111.319	107.935	205.839	207.126	134.577	133.023	541.029	318.68	113.699	97.2944	-0.0244304	0.0244304	0.0455449	-0.0455449	2.0276	-2.0276	0.609542	-0.609542	0.0957526	1
405	OG0003251	98.4748	98.1625	97.7659	123.7	227.822	228.975	107.799	142.25	136.857	129.357	-1.35725	1.35725	-0.0292492	0.0292492	-1.59689	1.59689	0.326529	-0.326529	0.0966688	1
87	OG0002031	211.017	177.865	258.667	270.563	140.072	113.632	301.334	289.495	140.072	127.883	-0.328236	0.328236	1.52177	-1.52177	0.2926	-0.2926	0.664246	-0.664246	0.0968698	1
1032	OG0004727	590.645	807.667	263.492	232.883	353.97	463.6	406.435	936.94	760.416	869.088	0.28802	-0.28802	-0.626317	0.626317	-1.84451	1.84451	-0.311496	0.311496	0.0971384	1
1157	OG0005023	264.436	275.374	515.831	565.848	218.604	204.664	332.155	257.759	209.707	170.636	-0.565471	0.565471	0.402756	-0.402756	1.54223	-1.54223	1.25624	-1.25624	0.0971646	1
1329	OG0005408	299.096	277.326	653.766	698.446	774.334	584.898	491.321	191.577	309.1	288.935	-0.150908	0.150908	0.636519	-0.636519	2.00465	-2.00465	0.153997	-0.153997	0.0973103	1
1130	OG0004970	521.939	388.092	208.097	225.242	302.605	233.492	156.56	83.9764	329.842	314.915	-0.231523	0.231523	0.754411	-0.754411	1.76582	-1.76582	0.13548	-0.13548	0.0974302	1
968	OG0004582	798.196	1015.72	583.541	635.226	108.655	108.017	158.314	294.051	835.136	910.477	-0.273629	0.273629	0.0189976	-0.0189976	-1.9361	1.9361	-0.278484	0.278484	0.097492	1
374	OG0003184	478.304	266.689	1138.54	905.533	129.869	44.8018	471.577	77.6765	113.698	169.895	0.25713	-0.25713	1.09854	-1.09854	1.61765	-1.61765	-0.446982	0.446982	0.0977921	1
824	OG0004261	901.564	1065.89	802.042	929.522	108.776	645.697	804.631	943.607	946.746	1012.93	-0.215274	0.215274	-2.08092	2.08092	-0.232449	0.232449	-0.0987504	0.0987504	0.098636	1
840	OG0004288	121.307	124.875	81.1312	120.803	375.389	416.811	301.714	295.223	133.641	138.202	-2.035	2.035	-0.541618	0.541618	0.112633	-0.112633	-0.173805	0.173805	0.098729	1
34	OG0001494	1322.58	973.368	1176.26	1166.42	495.843	521.508	1073.81	820.682	1098.24	912.688	0.0397579	-0.0397579	-0.23896	0.23896	1.26562	-1.26562	0.874022	-0.874022	0.098855	1
360	OG0003149	527.445	501.454	318.684	339.896	112.576	65.135	303.513	190.772	135.09	141.335	-0.19288	0.19288	1.5987	-1.5987	1.36593	-1.36593	-0.135292	0.135292	0.0989323	1
495	OG0003456	451.196	457.366	391.717	439.435	146.841	200.739	443.504	437.674	726.745	726.944	-0.735334	0.735334	-1.98609	1.98609	0.0847491	-0.0847491	-0.00175478	0.00175478	0.0993537	1
214	OG0002829	303.376	282.543	234.873	248.066	907.931	605.087	704.462	445.013	326.785	340.899	-0.189552	0.189552	1.38884	-1.38884	1.56614	-1.56614	-0.146673	0.146673	0.100017	1
100	OG0002161	470.355	509.055	468.762	576.102	365.596	337.448	152.537	291.202	475.994	515.032	-0.648514	0.648514	0.252746	-0.252746	-1.97269	1.97269	-0.248673	0.248673	0.100224	1
922	OG0004484	242.413	191.767	398.713	375.138	116.509	115.033	251.813	154.347	132.998	126.409	0.239504	-0.239504	0.0501088	-0.0501088	1.88659	-1.88659	0.199682	-0.199682	0.100321	1
1470	OG0006133	295.222	376.358	170.608	186.183	521.581	406.152	253.993	179.748	237.05	229.047	-0.373189	0.373189	1.06363	-1.06363	1.46329	-1.46329	0.14677	-0.14677	0.100505	1
516	OG0003532	140.884	128.784	10.0383	117.918	150.802	320.057	147.757	140.305	133.641	123.645	-1.94651	1.94651	-0.829908	0.829908	0.0597201	-0.0597201	0.0896995	-0.0896995	0.101105	1
424	OG0003283	125.383	123.791	148.632	148.134	175.854	180.509	166.219	120.738	127.21	111.301	0.0206269	-0.0206269	-0.160548	0.160548	1.94818	-1.94818	0.819888	-0.819888	0.101136	1
1437	OG0005655	528.608	549.81	313.974	284.052	256.071	312.311	218.581	387.073	704.388	775.221	0.349243	-0.349243	-0.690641	0.690641	-1.94179	1.94179	-0.334147	0.334147	0.102333	1
834	OG0004281	122.331	109.453	86.1597	94.0068	218.497	210.11	332.438	215.235	117.398	92.872	-0.363041	0.363041	0.163104	-0.163104	1.78378	-1.78378	0.972248	-0.972248	0.102936	1
1529	OG0006616	133.744	137.471	297.936	286.946	205.397	197.818	266.917	203.875	102.764	103.373	0.290441	-0.290441	0.290558	-0.290558	2.06979	-2.06979	-0.045727	0.045727	0.103114	1
534	OG0003579	454.858	393.084	824.152	851.408	280.655	254.384	208.875	165.405	617.388	607.539	-0.235142	0.235142	0.709769	-0.709769	1.67884	-1.67884	0.11622	-0.11622	0.103729	1
188	OG0002778	411.429	338.354	416.672	436.261	146.467	142.851	444.641	269.018	343.832	288.2	-0.173904	0.173904	0.0946397	-0.0946397	1.86333	-1.86333	0.666486	-0.666486	0.103861	1
1221	OG0005168	1475.29	1428.57	240.479	237.864	2877.3	3291.46	1409.05	2500.62	1656.28	1698.78	0.0402792	-0.0402792	-0.494637	0.494637	-2.05693	2.05693	-0.0933313	0.0933313	0.104734	1
745	OG0004090	477.692	427.396	450.079	367.441	482.185	505.637	474.942	331.179	336.274	337.584	1.0033	-1.0033	-0.235642	0.235642	1.7701	-1.7701	-0.0193016	0.0193016	0.104824	1
1244	OG0005206	144.552	136.385	467.932	514.355	97.5777	82.3785	467.033	337.748	319.936	297.168	-0.518542	0.518542	0.926698	-0.926698	1.7626	-1.7626	0.404805	-0.404805	0.105337	1
916	OG0004465	204.495	196.977	201.154	116.721	248.263	251.32	249.684	216.777	289.959	285.62	2.04423	-2.04423	-0.0470786	0.0470786	0.542932	-0.542932	0.0580204	-0.0580204	0.105518	1
1275	OG0005285	2344.23	2322.89	2152.68	2156.06	490.511	630.705	565.554	683.753	1911.02	1815.24	-0.0104501	0.0104501	-1.66864	1.66864	-1.2626	1.2626	0.343008	-0.343008	0.106268	1
991	OG0004631	92.3563	93.3847	112.427	120.313	96.4537	59.556	136.915	111.268	127.53	124.198	-0.275701	0.275701	1.92441	-1.92441	0.840837	-0.840837	0.107704	-0.107704	0.1066	1
363	OG0003154	121.106	130.087	235.192	213.19	392.827	386.982	320.403	142.651	90.2214	84.0252	0.266668	-0.266668	0.0407313	-0.0407313	2.08617	-2.08617	0.193255	-0.193255	0.106614	1
1569	OG0007092	516.026	478.868	867.16	871.384	856.617	741.621	530.236	540.718	654.053	598.14	-0.0553591	0.0553591	1.63946	-1.63946	-0.223004	0.223004	1.01743	-1.01743	0.106808	1
218	OG0002838	355.569	335.312	234.92	222.428	298.477	406.964	275.911	363.416	150.688	147.969	0.275988	-0.275988	-1.55396	1.55396	-1.38303	1.38303	0.0920033	-0.0920033	0.107188	1
1444	OG0005841	306.838	315.338	150.01	0.506198	561.869	419.842	312.555	266.438	249.574	243.413	2.09224	-2.09224	0.304741	-0.304741	0.167775	-0.167775	0.0263253	-0.0263253	0.107728	1
1377	OG0005523	764.963	912.127	275.429	252.8	2247.84	2830.9	727.653	1052.15	965.076	993.396	0.383456	-0.383456	-1.02762	1.02762	-1.63196	1.63196	-0.129434	0.129434	0.108026	1
288	OG0002997	673.418	754.461	106.777	172.717	105.222	132.1	803.876	815.366	289.636	270.322	-1.853	1.853	-0.889493	0.889493	-0.0557313	0.0557313	0.270902	-0.270902	0.108822	1
320	OG0003062	610.582	494.07	522.946	611.221	284.735	217.084	240.927	201.015	588.601	473.94	-0.703013	0.703013	1.21766	-1.21766	0.815739	-0.815739	0.974704	-0.974704	0.109724	1
819	OG0004253	1369.46	1620.12	842.233	926.339	992.637	980.546	679.758	1008.42	1467.64	1490.93	-0.463891	0.463891	0.0597742	-0.0597742	-1.89907	1.89907	-0.0767874	0.0767874	0.109814	1
221	OG0002843	1113.4	1194.67	444.501	448.047	448.809	481.121	452.262	445.415	417.328	431.926	-0.158808	0.158808	-1.38889	1.38889	0.304866	-0.304866	-0.687094	0.687094	0.10982	1
258	OG0002939	530.706	520.782	757.631	815.997	726.625	564.005	487.248	412.474	324.125	312.547	-0.501863	0.501863	1.70491	-1.70491	1.12453	-1.12453	0.246063	-0.246063	0.110001	1
1137	OG0004987	679.331	511.661	115.722	118.7	868.498	821.595	1107.53	741.596	763.089	713.141	-0.109068	0.109068	0.238241	-0.238241	1.6989	-1.6989	0.290469	-0.290469	0.110083	1
918	OG0004473	195.932	164.4	348.056	319.664	442.393	419.798	434.889	239.395	156.64	157	0.293869	-0.293869	0.181116	-0.181116	2.00375	-2.00375	-0.00792954	0.00792954	0.110094	1
189	OG0002779	76.0498	77.9654	3669.22	3287.33	427.031	449.261	120.534	116.849	64.167	49.5667	0.81269	-0.81269	-0.375553	0.375553	0.229826	-0.229826	1.90047	-1.90047	0.110205	1
133	OG0002413	479.527	417.408	499.652	513.959	144.126	134.146	673.729	445.651	275.321	260.193	-0.13583	0.13583	0.3451	-0.3451	1.96071	-1.96071	0.271857	-0.271857	0.111102	1
1287	OG0005314	327.635	381.791	294.151	307.178	249.578	205.462	638.412	588.436	301.54	292.44	-0.346505	0.346505	1.55067	-1.55067	0.651542	-0.651542	0.245044	-0.245044	0.111654	1
369	OG0003172	130.484	119.661	167.919	115.553	393.636	488.607	253.85	153.946	63.5237	53.6262	1.15688	-1.15688	-0.67414	0.67414	1.53421	-1.53421	0.529093	-0.529093	0.111987	1
1513	OG0006531	135.787	147.897	251.795	272.334	575.643	512.272	348.204	265.064	184.299	171.924	-0.512231	0.512231	0.761418	-0.761418	1.77208	-1.77208	0.454112	-0.454112	0.112224	1
820	OG0004255	80.5332	64.5006	373.633	395.727	60.3269	101.16	143.92	147.411	68.8308	70.9439	-0.219034	0.219034	-1.9286	1.9286	-0.0913808	0.0913808	-0.115308	0.115308	0.112234	1
1050	OG0004781	1849.06	2056.48	6463.15	6045.25	1739.13	1977.36	619.381	1076.04	3044.64	3300.82	0.247157	-0.247157	-0.474208	0.474208	-1.99261	1.99261	-0.298672	0.298672	0.112772	1
312	OG0003047	135.379	122.92	94.5708	105.974	278.27	250.191	277.804	199.854	135.413	115.721	-0.594513	0.594513	0.555553	-0.555553	1.70629	-1.70629	0.819848	-0.819848	0.113141	1
1478	OG0006269	271.774	223.467	231.156	158.943	1187.55	1259.76	321.785	217.983	304.753	318.971	1.37003	-1.37003	-0.218362	0.218362	1.42328	-1.42328	-0.168707	0.168707	0.11343	1
1486	OG0006319	196.544	215.219	189.338	177.409	289.566	311.656	358.004	294.318	77.8366	70.0207	0.532484	-0.532484	-0.601497	0.601497	1.59827	-1.59827	0.865385	-0.865385	0.113901	1
1501	OG0006418	98.6481	99.5872	194.554	228.172	16.4158	70.8803	229.609	254.945	157.122	158.654	-0.267285	0.267285	-2.09694	2.09694	-0.175736	0.175736	-0.0163074	0.0163074	0.113902	1
206	OG0002813	1716.89	2309.43	964.257	1072.44	248.987	237.244	1084.66	1776.56	1944.95	2070.82	-0.387579	0.387579	0.176233	-0.176233	-1.76446	1.76446	-0.228712	0.228712	0.113924	1
5	OG0000981	636.31	588.111	275.548	298.154	233.577	97.2266	1112.07	594.904	499.665	557.051	-0.161541	0.161541	1.68981	-1.68981	1.2421	-1.2421	-0.222641	0.222641	0.114118	1
108	OG0002248	132.525	126.395	134.068	108.586	164.39	136.95	267.485	227.164	159.533	182.611	1.26372	-1.26372	1.0958	-1.0958	0.980914	-0.980914	-0.811702	0.811702	0.114708	1
759	OG0004114	140.882	157.236	294.241	321.708	473.253	450.676	293.668	318.077	168.54	176.162	-1.07972	1.07972	0.591669	-0.591669	-0.966095	0.966095	-0.535346	0.535346	0.114761	1
171	OG0002656	1067.32	875.87	1921.2	1921.07	1242.41	1115.43	1363.42	531.639	1161.28	1071.16	0.000158934	-0.000158934	0.251155	-0.251155	2.04703	-2.04703	0.188275	-0.188275	0.115567	1
603	OG0003744	485.444	335.968	1070.22	969.508	172.838	172.014	558.338	315.181	421.024	413.313	0.311401	-0.311401	0.0150739	-0.0150739	1.75562	-1.75562	0.0582852	-0.0582852	0.115941	1
273	OG0002965	320.701	230.641	341.122	364.17	198.29	185.333	630.837	530.262	263.58	243.42	-0.355733	0.355733	0.367673	-0.367673	0.94292	-0.94292	0.432841	-0.432841	0.115991	1
128	OG0002382	196.134	175.255	357.969	381.271	190.592	184.908	513.854	355.34	285.294	246.369	-0.322448	0.322448	0.15484	-0.15484	1.86558	-1.86558	0.748953	-0.748953	0.116467	1
169	OG0002650	1175.58	1139.73	714.367	711.305	0	97.9088	89.0511	155.956	1322.15	1245.34	0.00439304	-0.00439304	-2.04531	2.04531	-0.558517	0.558517	0.0611886	-0.0611886	0.117121	1
1170	OG0005050	231.811	191.108	240.651	89.8274	244.359	215.684	125.506	125.368	380.501	356.387	2.05242	-2.05242	0.280309	-0.280309	0.00248308	-0.00248308	0.147164	-0.147164	0.117634	1
1248	OG0005221	320.502	347.693	667.452	600.948	70.1871	79.8087	145.199	221.032	383.876	429.35	0.476341	-0.476341	-0.582765	0.582765	-1.88115	1.88115	-0.508015	0.508015	0.117879	1
93	OG0002078	636.516	515.788	118.008	126.326	251.787	169.362	302.139	216.374	409.41	424.195	-0.258373	0.258373	1.48547	-1.48547	1.25544	-1.25544	-0.134619	0.134619	0.118204	1
521	OG0003545	219.988	179.605	232.977	176.27	196.833	211.872	236.714	145.333	177.707	180.584	0.990628	-0.990628	-0.263068	0.263068	1.71001	-1.71001	-0.0574105	0.0574105	0.118402	1
481	OG0003426	273.811	245.187	486.172	362.989	509.994	553.714	552.06	374.005	197.165	199.011	1.22831	-1.22831	-0.348022	0.348022	1.62803	-1.62803	-0.0394671	0.0394671	0.118507	1
666	OG0003907	673.624	757.17	511.249	724.865	526.836	470.153	613.652	753.874	577.987	618.411	-1.67044	1.67044	0.549566	-0.549566	-0.99114	0.99114	-0.326604	0.326604	0.118715	1
316	OG0003056	237.112	226.514	412.437	517.509	396.783	256.573	474.561	249.482	161.304	142.074	-0.599216	0.599216	1.1381	-1.1381	1.64863	-1.64863	0.336157	-0.336157	0.119085	1
392	OG0003220	378.74	366.941	435.93	459.748	273.909	275.082	178.008	279.239	767.268	792.454	-0.25167	0.25167	-0.0202292	0.0202292	-2.09534	2.09534	-0.152825	0.152825	0.119347	1
1300	OG0005345	857.324	1058.94	1272.87	1283.87	1449.63	1685.41	1196.96	1452.62	1530.04	1450.2	-0.0557997	0.0557997	-0.975063	0.975063	-1.25098	1.25098	0.347291	-0.347291	0.119417	1
526	OG0003561	307.657	314.685	727.104	726.524	1322.79	1303.76	122.948	67.0867	126.565	113.51	0.0028316	-0.0028316	0.0513572	-0.0513572	2.08383	-2.08383	0.385483	-0.385483	0.119545	1
1356	OG0005479	224.272	224.992	299.238	323.778	427.301	383.864	520.104	348.237	295.745	272.353	-0.392618	0.392618	0.533765	-0.533765	1.97287	-1.97287	0.410448	-0.410448	0.119685	1
684	OG0003951	98.065	138.34	241.157	251.47	132.415	142.167	30.6774	93.6266	280.307	305.705	-0.0825979	0.0825979	-0.140133	0.140133	-1.99811	1.99811	-0.171008	0.171008	0.120189	1
411	OG0003259	428.357	408.938	116.509	121.423	481.58	411.881	444.451	239.128	247.339	241.395	-0.140358	0.140358	0.530197	-0.530197	2.04145	-2.04145	0.0826544	-0.0826544	0.120355	1
156	OG0002562	728.672	745.34	306.647	276.858	327.803	241.266	598.738	460.392	724.653	839.351	0.492775	-0.492775	1.46783	-1.46783	1.26082	-1.26082	-0.707868	0.707868	0.121101	1
1357	OG0005481	187.163	161.364	123.408	398.186	1433.99	1428.61	589.318	1030.4	143.129	120.328	-1.85061	1.85061	0.00660538	-0.00660538	-0.956632	0.956632	0.304028	-0.304028	0.121343	1
924	OG0004486	331.717	456.065	309.648	315.205	19.1502	59.6177	588.134	717.583	501.437	500.11	-0.0345146	0.0345146	-1.99386	1.99386	-0.384759	0.384759	0.00514172	-0.00514172	0.121424	1
795	OG0004200	896.263	1256.13	1022.66	957.707	3754.4	4012.08	2364.45	3057.63	1944.54	2106.01	0.317345	-0.317345	-0.321034	0.321034	-1.23702	1.23702	-0.385722	0.385722	0.121553	1
1198	OG0005122	189.202	163.317	176.926	140.729	143.611	153.091	1177.03	1080.88	64.13	60.6616	1.63034	-1.63034	-0.457135	0.457135	0.609231	-0.609231	0.397655	-0.397655	0.122484	1
1203	OG0005128	313.57	287.319	210.858	222.506	176.217	134.728	149.365	112.996	446.433	459.753	-0.285572	0.285572	1.41761	-1.41761	1.47275	-1.47275	-0.156164	0.156164	0.122488	1
789	OG0004189	166.367	126.61	349.002	389.561	577.887	533.285	84.1284	70.5386	61.7547	48.4648	-0.547338	0.547338	0.400061	-0.400061	0.875731	-0.875731	1.20176	-1.20176	0.123225	1
212	OG0002826	265.046	234.333	159.389	228.795	189.098	87.9843	490.089	39.7429	256.023	217.993	-0.400286	0.400286	0.816982	-0.816982	1.90292	-1.90292	0.179616	-0.179616	0.12341	1
119	OG0002339	197.614	225.131	150.869	180.667	206.905	230.848	39.5783	36.3249	216.947	235.312	-1.39083	1.39083	-0.846347	0.846347	0.663266	-0.663266	-0.628376	0.628376	0.123816	1
33	OG0001493	51.7859	47.561	121.494	113.184	62.3515	65.7403	102.544	54.8901	50.1757	44.9618	0.239476	-0.239476	-0.17892	0.17892	2.04708	-2.04708	0.370635	-0.370635	0.124	1
841	OG0004292	448.537	373.322	594.12	115.501	820.998	702.524	216.621	216.674	604.075	545.894	2.0828	-2.0828	0.240136	-0.240136	-0.000381109	0.000381109	0.156236	-0.156236	0.124054	1
843	OG0004294	153.115	135.082	281.186	24.9367	86.9403	74.2181	275.864	267.712	154.549	136.544	2.10015	-2.10015	0.198058	-0.198058	0.037628	-0.037628	0.155186	-0.155186	0.124659	1
828	OG0004272	418.489	517.184	575.533	544.302	215.185	219.152	227.883	318.038	385.967	440.036	0.283511	-0.283511	-0.0928512	0.0928512	-1.67881	1.67881	-0.665441	0.665441	0.125025	1
198	OG0002798	200.823	160.706	964.245	1116.12	73.6638	58.8733	263.08	217.078	129.78	110.47	-0.724163	0.724163	1.10694	-1.10694	0.950335	-0.950335	0.797259	-0.797259	0.125753	1
695	OG0003978	160.659	119.448	282.079	346.217	238.224	186.87	298.352	169.595	135.413	111.85	-0.597273	0.597273	0.70683	-0.70683	1.60989	-1.60989	0.557573	-0.557573	0.125889	1
1055	OG0004790	201.641	244.538	224.819	208.417	364.461	453.618	89.8086	156.393	211.452	212.633	0.259606	-0.259606	-0.747318	0.747318	-1.85449	1.85449	-0.0190897	0.0190897	0.127233	1
152	OG0002530	759.255	798.55	574.374	594.202	2111.43	2113.08	630.875	1164.66	790.106	850.219	-0.119548	0.119548	-0.00274687	0.00274687	-2.09462	2.09462	-0.258207	0.258207	0.127319	1
310	OG0003045	820.013	821.568	756.007	748.001	264.379	264.475	260.857	270.962	746.772	770.299	0.449595	-0.449595	-0.0153239	0.0153239	-1.60485	1.60485	-1.30984	1.30984	0.127638	1
1066	OG0004810	169.43	177.431	55.5138	251.317	243.795	258.757	273.495	278.032	169.341	197.17	-2.10268	2.10268	-0.0980957	0.0980957	-0.027108	0.027108	-0.250187	0.250187	0.128121	1
246	OG0002912	91.7446	88.824	155.029	162.759	109.895	79.3818	243.86	251.425	109.841	88.6319	-0.262994	0.262994	1.743	-1.743	-0.16514	0.16514	1.15539	-1.15539	0.128307	1
638	OG0003832	1611.07	1830.99	1044.05	967.178	850.183	2627.45	749.843	953.192	1131.37	1183.4	0.15283	-0.15283	-2.04337	2.04337	-0.477416	0.477416	-0.0898786	0.0898786	0.128851	1
1047	OG0004773	239.355	201.974	440.387	414.69	267.998	284.491	567.163	334.965	220.966	199.013	0.228343	-0.228343	-0.226823	0.226823	1.95563	-1.95563	0.397157	-0.397157	0.129834	1
907	OG0004450	480.345	601.571	126.856	137.533	1712.67	1782.81	856.045	1326.06	628.065	605.048	-0.345907	0.345907	-0.171879	0.171879	-1.84502	1.84502	0.159883	-0.159883	0.12994	1
693	OG0003976	416.324	319.028	279.543	232.212	343.954	364.988	256.312	222.841	396.702	391.293	1.09905	-1.09905	-0.35257	0.35257	0.830093	-0.830093	0.0815603	-0.0815603	0.129977	1
523	OG0003555	475.452	456.933	851.556	798.735	598.964	623.818	924.26	1050.03	784.478	878.414	0.712482	-0.712482	-0.452462	0.452462	-1.41809	1.41809	-1.25747	1.25747	0.130025	1
1547	OG0006812	223.862	238.022	161.353	151.415	174.832	159.545	538.047	476.042	54.3586	58.2292	0.712125	-0.712125	1.02455	-1.02455	1.37024	-1.37024	-0.770442	0.770442	0.13006	1
228	OG0002858	496.451	477.565	426.932	817.863	600.379	500.087	372.396	541.957	475.543	504.894	-1.76423	1.76423	0.511967	-0.511967	-1.04175	1.04175	-0.168169	0.168169	0.130864	1
1206	OG0005136	315.201	259.088	76.0995	116.15	460.475	177.704	330.207	161.509	181.564	138.757	-0.712372	0.712372	1.51516	-1.51516	1.17318	-1.17318	0.456977	-0.456977	0.1312	1
375	OG0003185	131.098	135.521	128.877	116.987	128.105	135.605	139.613	88.0492	127.208	120.695	0.435821	-0.435821	-0.256277	0.256277	2.04107	-2.04107	0.236772	-0.236772	0.131236	1
241	OG0002900	166.163	209.138	97.6379	79.4244	220.042	211.062	178.765	172.577	224.502	231.996	1.38825	-1.38825	0.28113	-0.28113	0.237693	-0.237693	-0.221527	0.221527	0.13183	1
998	OG0004648	235.889	236.509	339.598	328.162	286.769	308.423	358.101	402.353	191.694	193.485	0.512399	-0.512399	-1.08858	1.08858	-1.74113	1.74113	-0.139157	0.139157	0.132525	1
1029	OG0004713	76.8613	83.829	123.705	114.845	173.578	169.698	316.958	170.701	50.6598	50.4881	0.25788	-0.25788	0.0784817	-0.0784817	2.08244	-2.08244	0.0117856	-0.0117856	0.132808	1
758	OG0004112	419.384	317.723	585.215	581.427	788.534	855.765	1035.24	819.152	355.252	277.881	0.031053	-0.031053	-0.390968	0.390968	1.11423	-1.11423	1.16853	-1.16853	0.132915	1
77	OG0001996	677.7	605.917	230.426	201.853	1030.51	1067.33	292.53	206.59	489.536	495.687	0.724158	-0.724158	-0.192309	0.192309	1.88641	-1.88641	-0.0684028	0.0684028	0.133	1
1128	OG0004967	644.673	830.038	200.748	435.612	610.276	600.758	1803.51	2020.49	937.74	964.468	-1.98547	1.98547	0.042281	-0.042281	-0.305242	0.305242	-0.0755879	0.0755879	0.133497	1
620	OG0003781	171.262	253.874	670.894	682.819	121.298	143.775	85.0758	146.038	166.882	155.706	-0.0549115	0.0549115	-0.528568	0.528568	-1.64429	1.64429	0.21597	-0.21597	0.133755	1
934	OG0004500	258.114	226.729	276.988	277.646	977.974	996.265	592.632	558.679	235.279	219.648	-0.0316523	0.0316523	-0.247067	0.247067	0.786448	-0.786448	0.916294	-0.916294	0.133857	1
1595	OG0008051	170.649	163.532	751.538	671.494	228.76	256.216	488.81	398.2	319.066	279.537	0.811537	-0.811537	-0.816802	0.816802	1.47382	-1.47382	0.952728	-0.952728	0.134447	1
1044	OG0004767	306.02	298.833	289.759	237.562	406.687	471.524	989.197	665.756	237.209	213.386	0.884315	-0.884315	-0.659573	0.659573	1.74602	-1.74602	0.472327	-0.472327	0.134631	1
403	OG0003248	246.898	249.748	116.318	90.3271	100.382	116.734	137.057	90.6117	252.807	234.021	1.04951	-1.04951	-0.628428	0.628428	1.70224	-1.70224	0.32199	-0.32199	0.134672	1
442	OG0003319	26.0826	52.1065	514.341	262.321	57.4808	38.6264	112.928	98.4973	225.471	288.566	1.31434	-1.31434	0.794624	-0.794624	0.276458	-0.276458	-0.497178	0.497178	0.134733	1
289	OG0002998	200.208	143.988	290.571	303.349	211.306	107.288	224.828	40.2117	111.929	138.755	-0.0574807	0.0574807	0.872316	-0.872316	1.86107	-1.86107	-0.285916	0.285916	0.135406	1
1451	OG0005935	420.404	489.727	158.833	151.139	459.362	513.555	616.209	716.946	600.646	607.318	0.426237	-0.426237	-0.956497	0.956497	-1.29757	1.29757	-0.0948421	0.0948421	0.135425	1
733	OG0004059	110.094	92.0838	127.865	140.814	122.769	106.84	159.212	84.1775	74.4594	68.5483	-0.305723	0.305723	0.440098	-0.440098	1.9557	-1.9557	0.26221	-0.26221	0.135753	1
393	OG0003221	128.445	109.238	147.964	202.823	270.551	161.747	301.997	164.333	136.697	110.562	-0.755829	0.755829	1.21641	-1.21641	1.42674	-1.42674	0.51084	-0.51084	0.135873	1
816	OG0004249	221.209	297.311	274.558	269.002	601.012	665.771	366.335	625.263	229.972	231.813	0.07131	-0.07131	-0.35664	0.35664	-1.8217	1.8217	-0.0278171	0.0278171	0.136324	1
507	OG0003490	501.222	319.226	164.439	193.994	298.202	226.837	40.1928	33.0402	522.076	441.186	-0.579602	0.579602	0.955455	-0.955455	0.686546	-0.686546	0.590292	-0.590292	0.136327	1
1056	OG0004791	265.458	243.667	236.463	346.408	88.0201	94.0197	428.449	412.543	171.916	178.742	-2.0201	2.0201	-0.352963	0.352963	0.202555	-0.202555	-0.208462	0.208462	0.136532	1
47	OG0001643	883.832	749.464	1478.43	1356.54	1315.17	1390.88	228.333	350.28	846.071	961.339	0.379094	-0.379094	-0.246697	0.246697	-1.85825	1.85825	-0.562305	0.562305	0.136852	1
576	OG0003677	440.588	387.438	341.263	359.835	209.177	140.486	210.011	205.987	504.814	451.275	-0.2602	0.2602	1.92957	-1.92957	0.0950213	-0.0950213	0.55003	-0.55003	0.139043	1
982	OG0004609	152.096	169.613	270.263	283.617	244.917	163.613	294.47	283.026	140.715	129.908	-0.24071	0.24071	1.98705	-1.98705	0.197861	-0.197861	0.398717	-0.398717	0.139059	1
185	OG0002771	259.741	263.864	277.247	378.315	396.687	547.716	333.339	304.069	196.361	192.927	-1.43985	1.43985	-1.49356	1.49356	0.428865	-0.428865	0.0823824	-0.0823824	0.13911	1
1094	OG0004880	648.341	755.549	711.038	679.45	83.3821	83.6826	468.454	594.734	512.371	569.576	0.316014	-0.316014	-0.0250231	0.0250231	-1.65228	1.65228	-0.735506	0.735506	0.139348	1
776	OG0004154	1085.67	936.451	280.046	266.211	467.263	565.135	214.318	270.057	541.77	529.551	0.318534	-0.318534	-1.19236	1.19236	-1.44735	1.44735	0.143462	-0.143462	0.139472	1
500	OG0003468	628.563	558.571	447.971	469.628	584.521	478.859	245.659	230.683	1105.38	1070.49	-0.406751	0.406751	1.7124	-1.7124	0.541796	-0.541796	0.27629	-0.27629	0.139978	1
805	OG0004224	627.753	628.718	115.547	110.562	516.897	376.948	61.2616	63.7696	613.065	582.556	0.289742	-0.289742	2.05767	-2.05767	-0.263618	0.263618	0.335353	-0.335353	0.140004	1
1311	OG0005374	364.34	321.417	626.905	663.2	436.889	424.836	265.779	172.542	325.82	292.252	-0.258983	0.258983	0.128754	-0.128754	1.95816	-1.95816	0.499969	-0.499969	0.140071	1
1289	OG0005317	551.092	242.366	131.541	126.705	460.079	204.4	94.3525	31.5664	46.7615	64.6916	0.0524218	-0.0524218	1.07708	-1.07708	1.39575	-1.39575	-0.450325	0.450325	0.140248	1
1201	OG0005125	461.384	490.159	431.804	586.748	445.711	472.255	404.682	450.14	521.377	479.654	-1.8802	1.8802	-0.357401	0.357401	-0.657272	0.657272	0.515157	-0.515157	0.140331	1
716	OG0004029	600.433	729.486	225.812	300.419	273.539	252.02	361.507	413.194	834.33	864.043	-1.58618	1.58618	0.458097	-0.458097	-0.746453	0.746453	-0.195732	0.195732	0.141901	1
235	OG0002885	140.268	127.694	290.353	312.139	240.116	223.309	220.664	192.346	311.991	289.491	-0.733882	0.733882	0.736033	-0.736033	1.3915	-1.3915	0.759188	-0.759188	0.141998	1
1598	OG0008110	211.017	232.376	394.831	407.314	51.9212	60.5127	27.5533	34.6829	1230.91	1131.41	-0.216282	0.216282	-1.06197	1.06197	-1.59206	1.59206	0.585347	-0.585347	0.142259	1
1123	OG0004955	855.894	1039.61	1225.33	1166.01	2187.5	2390.99	263.028	815.694	605.003	676.27	0.0998788	-0.0998788	-0.178955	0.178955	-2.0629	2.0629	-0.22396	0.22396	0.142462	1
653	OG0003879	208.919	173.976	127.222	153.488	56.0519	164.887	25.6123	187.052	258.439	148.704	-0.208231	0.208231	-1.09623	1.09623	-1.68935	1.68935	0.599794	-0.599794	0.142858	1
1323	OG0005400	240.172	176.779	140.702	164.631	1034.29	838.327	948.524	622.542	1174.08	1062.48	-0.567725	0.567725	0.758066	-0.758066	1.5031	-1.5031	0.361451	-0.361451	0.143002	1
439	OG0003310	241.194	333.794	204.24	167.438	237.258	308.563	597.651	990.622	367.153	418.477	0.610708	-0.610708	-0.805743	0.805743	-1.52604	1.52604	-0.402934	0.402934	0.143111	1
676	OG0003931	98.4768	82.9582	150.578	155.818	71.3856	69.4568	164.706	84.7803	84.1086	75.921	-0.107902	0.107902	0.0864022	-0.0864022	2.02125	-2.02125	0.322804	-0.322804	0.143572	1
807	OG0004229	330.084	400.468	366.739	379.025	191.188	244.72	614.22	860.169	412.827	365.224	-0.147408	0.147408	-1.09885	1.09885	-1.49263	1.49263	0.547443	-0.547443	0.144214	1
707	OG0004013	124.574	120.961	153.767	146.096	146.632	145.657	743.134	762.186	103.889	88.0809	0.613494	-0.613494	0.0799746	-0.0799746	-0.303538	0.303538	1.97499	-1.97499	0.144233	1
641	OG0003844	169.02	178.082	283.303	45.8661	262.122	226.474	225.635	219.122	165.001	162.157	2.1086	-2.1086	0.213278	-0.213278	0.0428098	-0.0428098	0.0254069	-0.0254069	0.145604	1
1479	OG0006276	443.44	233.46	233.546	195.941	224.419	197.292	60.3142	24.7639	159.141	185.233	0.345877	-0.345877	0.254112	-0.254112	1.65063	-1.65063	-0.299307	0.299307	0.145838	1
896	OG0004430	738.255	760.979	555.088	508.236	819.478	883.604	381.012	629.704	786.52	870.968	0.361841	-0.361841	-0.309205	0.309205	-2.02062	2.02062	-0.418398	0.418398	0.14584	1
860	OG0004338	154.948	155.279	145.084	138.374	108.69	107.872	285.049	164.867	114.664	112.959	0.187174	-0.187174	0.02987	-0.02987	2.11199	-2.11199	0.0592269	-0.0592269	0.146298	1
876	OG0004379	388.6	331.839	298.614	392.057	569.286	610.791	360.56	373.368	421.669	399.867	-1.75453	1.75453	-0.456117	0.456117	-0.226312	0.226312	0.344148	-0.344148	0.146344	1
491	OG0003448	169.788	133.744	358.616	392.345	82.9422	71.6045	396.44	132.8	94.7179	86.7892	-0.182839	0.182839	0.298633	-0.298633	2.02783	-2.02783	0.17782	-0.17782	0.147146	1
663	OG0003902	748.653	898.884	656.848	736.816	171.181	152.871	314.449	203.239	104.854	95.0814	-0.483653	0.483653	0.476264	-0.476264	1.81073	-1.81073	0.412015	-0.412015	0.148664	1
988	OG0004623	321.317	324.675	336.806	342.741	81.2248	81.8697	229.896	212.654	232.386	219.095	-0.370327	0.370327	-0.167649	0.167649	1.6518	-1.6518	1.2481	-1.2481	0.149098	1
660	OG0003894	94.8069	84.2634	141.936	154.838	582.718	592.323	108.508	57.2351	61.7531	49.0158	-0.272732	0.272732	-0.0512777	0.0512777	1.94067	-1.94067	0.721368	-0.721368	0.149198	1
174	OG0002665	213.67	190.457	295.522	276.949	126.777	116.947	261.993	119.698	92.7896	97.2944	0.180415	-0.180415	0.224279	-0.224279	2.0731	-2.0731	-0.131787	0.131787	0.149454	1
1113	OG0004931	710.019	763.915	872.376	705.74	229.064	232.749	344.558	324.277	544.213	549.308	1.92844	-1.92844	-0.145717	0.145717	0.553783	-0.553783	-0.0850912	0.0850912	0.149672	1
1339	OG0005438	170.855	172.221	205.402	197.398	166.78	193.908	306.494	311.309	284.813	302.939	0.500987	-0.500987	-1.89624	1.89624	-0.196484	0.196484	-0.777556	0.777556	0.149686	1
591	OG0003712	199.804	234.548	316.398	298.91	29.2803	97.1362	516.696	645.504	251.52	248.762	0.108702	-0.108702	-2.05292	2.05292	-0.423888	0.423888	0.0210831	-0.0210831	0.149715	1
1288	OG0005315	204.901	190.893	399.6	24.2326	285.94	265.658	407.476	372.363	225.308	214.672	2.1143	-2.1143	0.0877824	-0.0877824	0.10749	-0.10749	0.0577083	-0.0577083	0.15027	1
956	OG0004557	1199.43	1176.43	763.228	762.22	199.039	101.821	1067.48	967.668	1290.74	1311.26	0.00428656	-0.00428656	2.09577	-2.09577	0.31808	-0.31808	-0.0511634	0.0511634	0.150511	1
1550	OG0006849	901.158	958.385	91.3569	98.7767	2399.3	1862.85	1728.09	1519.91	986.467	960.783	-0.55074	0.55074	1.77628	-1.77628	0.904569	-0.904569	0.18615	-0.18615	0.150852	1
1189	OG0005099	172.482	170.266	281.251	348.368	299.272	345.45	318.284	298.575	186.713	187.218	-1.70657	1.70657	-1.14664	1.14664	0.511511	-0.511511	-0.0216209	0.0216209	0.150902	1
786	OG0004167	43.6327	79.2684	103.5	106.655	75.493	63.9122	70.161	42.8261	142.004	148.706	-0.0821528	0.0821528	0.454612	-0.454612	1.32395	-1.32395	-0.126163	0.126163	0.150947	1
1149	OG0005005	214.076	190.461	359.806	310.857	456.067	454.986	238.113	239.763	249.126	243.339	1.64246	-1.64246	0.026695	-0.026695	-0.077703	0.077703	0.264413	-0.264413	0.151438	1
1269	OG0005274	253.629	245.619	185.034	155.432	89.4536	86.2568	669.232	739.267	236.564	186.297	1.17236	-1.17236	0.245315	-0.245315	-0.670439	0.670439	1.60285	-1.60285	0.15169	1
579	OG0003688	59.5334	61.6773	119.882	114.193	294.439	291.597	194.576	154.448	59.664	61.1794	0.431101	-0.431101	0.0860315	-0.0860315	2.03933	-2.03933	-0.222425	0.222425	0.152197	1
1133	OG0004978	617.145	677.795	444.169	412.853	739.34	851.31	419.264	529.828	893.153	904.903	0.521456	-0.521456	-1.00453	1.00453	-1.66241	1.66241	-0.0932521	0.0932521	0.152431	1
1053	OG0004787	206.33	221.732	114.819	92.274	119.33	149.128	57.2843	118.759	197.805	233.84	0.58776	-0.58776	-0.599281	0.599281	-1.88534	1.88534	-0.450727	0.450727	0.152723	1
301	OG0003025	298.89	278.199	94.4802	85.7421	173.366	68.0387	468.832	485.225	301.537	289.672	0.233094	-0.233094	2.09758	-2.09758	-0.0826032	0.0826032	0.0964789	-0.0964789	0.153817	1
589	OG0003710	140.065	122.705	102.885	117.756	68.0112	57.2808	299.776	245.764	92.9553	82.739	-0.833482	0.833482	1.0591	-1.0591	1.22437	-1.22437	0.719093	-0.719093	0.15423	1
909	OG0004455	266.063	339.221	682.216	641.956	286.019	311.441	315.065	481.204	533.113	552.994	0.260686	-0.260686	-0.364826	0.364826	-1.78896	1.78896	-0.15694	0.15694	0.154421	1
543	OG0003600	553.724	465.323	1139.8	1233.46	452.167	412.026	624.688	414.25	558.525	529.776	-0.363769	0.363769	0.428141	-0.428141	1.86701	-1.86701	0.243493	-0.243493	0.15472	1
1586	OG0007658	63.2033	86.0008	81.1968	91.505	227.757	175.955	56.7157	51.974	70.1157	61.1757	-0.566743	0.566743	1.21835	-1.21835	0.414235	-0.414235	0.646548	-0.646548	0.154918	1
891	OG0004419	328.661	330.276	2033.14	1790	854.844	765.175	362.264	333.96	529.257	578.976	1.29941	-1.29941	1.13089	-1.13089	0.830623	-0.830623	-0.916613	0.916613	0.155381	1
244	OG0002910	311.327	396.34	564.611	536.641	355.804	382.036	282.444	357.719	423.599	433.216	0.309553	-0.309553	-0.433319	0.433319	-1.43315	1.43315	-0.13681	0.13681	0.156297	1
1270	OG0005275	1111.56	1369.71	382.222	355.497	1287.44	1898.18	523.56	560.555	387.252	412.582	0.340089	-0.340089	-1.79983	1.79983	-0.320357	0.320357	-0.297306	0.297306	0.156398	1
1049	OG0004777	245.675	302.082	182.461	151.558	236.486	203.007	77.4044	55.3254	232.593	277.847	0.79794	-0.79794	0.656974	-0.656974	1.43465	-1.43465	-0.764627	0.764627	0.156465	1
986	OG0004619	423.395	514.901	901.223	817.055	369.276	377.944	197.419	312.917	362.149	427.274	0.392546	-0.392546	-0.0929623	0.0929623	-1.81367	1.81367	-0.661107	0.661107	0.156489	1
1268	OG0005270	393.081	415.453	357.844	350.432	834.777	805.578	99.8452	146.204	457.213	513.565	0.110922	-0.110922	0.18866	-0.18866	-1.9969	1.9969	-0.615229	0.615229	0.157521	1
450	OG0003348	8364.03	8662.4	5362.26	5227.59	11231.3	11236.3	5919.65	6986.34	13106	13814.7	0.301744	-0.301744	-0.00525182	0.00525182	-1.96108	1.96108	-0.624649	0.624649	0.157615	1
112	OG0002284	259.743	335.533	414.604	421.734	390.262	386.69	102.97	135.012	443.701	452.935	-0.0973098	0.0973098	0.0524824	-0.0524824	-1.53685	1.53685	-0.117552	0.117552	0.158023	1
263	OG0002952	232.427	224.343	64.9274	98.8513	256.125	234.053	151.827	169.159	231.098	243.236	-1.98874	1.98874	0.432329	-0.432329	-0.518424	0.518424	-0.245702	0.245702	0.159017	1
1429	OG0005641	85.8341	80.1371	170.611	169.404	161.81	146.691	203.952	100.932	103.085	106.324	0.021916	-0.021916	0.302631	-0.302631	2.0866	-2.0866	-0.0954949	0.0954949	0.159172	1
31	OG0001476	2466.53	2272.21	851.268	1417.37	1671.19	1544.64	1349.31	1672.42	2346.04	2273.15	-1.90539	1.90539	0.300485	-0.300485	-0.816494	0.816494	0.120484	-0.120484	0.159368	1
770	OG0004144	85.0186	77.9632	105.509	135.33	151.174	120.23	217.728	144.562	62.2388	48.0926	-0.888334	0.888334	0.817987	-0.817987	1.44886	-1.44886	0.919848	-0.919848	0.160017	1
1207	OG0005139	171.872	164.4	157.359	162.515	133.579	122.274	138.24	129.099	160.014	159.576	-0.549236	0.549236	1.50536	-1.50536	1.16492	-1.16492	0.0466981	-0.0466981	0.160642	1
1332	OG0005417	1408.41	1395.77	1067.02	851.184	58.9562	68.3043	251.673	199.718	1158.87	1057.52	1.30576	-1.30576	-0.852426	0.852426	1.33569	-1.33569	0.530613	-0.530613	0.160677	1
457	OG0003365	834.281	894.319	473.126	537.034	612.047	687.371	555.374	508.95	510.92	546.913	-1.2445	1.2445	-1.14029	1.14029	0.858033	-0.858033	-0.6693	0.6693	0.160828	1
1490	OG0006348	113.968	101.854	171.364	158.051	414.99	437.162	245.281	160.278	378.408	369.828	0.385258	-0.385258	-0.248019	0.248019	1.99796	-1.99796	0.10932	-0.10932	0.160859	1
566	OG0003652	551.903	628.283	588.145	588.52	1033.96	993.5	648.117	724.149	1008.53	1105.3	-0.00684418	0.00684418	0.428625	-0.428625	-1.19017	1.19017	-0.983404	0.983404	0.160917	1
1402	OG0005586	71.7663	75.1421	179.628	166.899	153.816	156.244	286.279	190.504	109.404	110.792	0.378728	-0.378728	-0.0807543	0.0807543	2.07116	-2.07116	-0.065005	0.065005	0.16105	1
919	OG0004477	193.689	172.868	372.033	389.555	369.017	325.695	226.106	199.003	180.513	181.496	-0.450869	0.450869	1.22211	-1.22211	1.24946	-1.24946	-0.0532161	0.0532161	0.16265	1
423	OG0003282	356.591	359.644	102.076	52.5213	96.0651	99.5679	407.049	400.981	302.344	277.512	2.09868	-2.09868	-0.117229	0.117229	0.0491652	-0.0491652	0.280382	-0.280382	0.162671	1
569	OG0003656	112.746	121.4	134.206	147.998	189.198	210.794	422.058	572.284	72.5296	64.312	-0.569846	0.569846	-0.629504	0.629504	-1.76155	1.76155	0.700183	-0.700183	0.163183	1
1316	OG0005385	1171.25	1482.44	1246.37	1190.87	589.641	618.558	332.154	537.398	1043.52	1093.61	0.181151	-0.181151	-0.190399	0.190399	-1.87773	1.87773	-0.186458	0.186458	0.163224	1
592	OG0003718	190.223	217.391	236.81	183.305	419.347	394.573	393.428	236.715	207.456	246.739	0.895991	-0.895991	0.214135	-0.214135	1.74964	-1.74964	-0.608485	0.608485	0.163288	1
989	OG0004628	1160.49	1007.04	2257.36	2383.78	1923.84	1950.67	1299.26	1081.57	1522.15	1310.52	-0.411216	0.411216	-0.104518	0.104518	1.3804	-1.3804	1.12788	-1.12788	0.163647	1
1514	OG0006541	244.044	260.393	95.7327	60.0493	974.918	759.786	853.206	1028.82	279.667	255.58	1.72192	-1.72192	0.932276	-0.932276	-0.70147	0.70147	0.338285	-0.338285	0.163749	1
1100	OG0004900	215.709	303.174	181.671	156.782	400.052	478.797	390.957	525.939	565.763	620.434	0.608843	-0.608843	-0.741833	0.741833	-1.21886	1.21886	-0.381593	0.381593	0.164745	1
564	OG0003646	67.077	62.5438	239.546	267.24	326.849	288.569	173.321	111.12	62.7212	59.1524	-0.486596	0.486596	0.553862	-0.553862	1.94718	-1.94718	0.260743	-0.260743	0.165104	1
886	OG0004407	109.482	77.9654	122.674	169.713	126.451	74.4667	380.964	233.598	106.464	88.0809	-0.788082	0.788082	1.26745	-1.26745	1.17466	-1.17466	0.462892	-0.462892	0.165757	1
800	OG0004209	344.768	318.883	222.555	168.239	169.177	193.64	102.658	70.3325	116.273	115.353	1.20048	-1.20048	-0.582363	0.582363	1.61401	-1.61401	0.0342937	-0.0342937	0.166108	1
398	OG0003235	210.002	207.182	156.447	156.691	1604.14	1641.36	285.281	196.121	147.471	138.755	-0.0087901	0.0087901	-0.129289	0.129289	2.08795	-2.08795	0.343309	-0.343309	0.166306	1
520	OG0003542	1131.13	1130.39	287.242	456.042	485.601	416.765	721.026	996.822	969.584	970.365	-1.67048	1.67048	0.561121	-0.561121	-1.18094	1.18094	-0.00295915	0.00295915	0.166616	1
1602	OG0008967	212.035	234.548	175.805	185.788	162.913	183.731	88.7197	91.8845	124.637	118.299	-0.658971	0.658971	-1.43357	1.43357	-0.418273	0.418273	0.622681	-0.622681	0.166745	1
601	OG0003742	121.921	119.228	110.15	117.477	483.644	539.93	895.813	830.411	395.134	431.193	-0.787172	0.787172	-1.34478	1.34478	0.926545	-0.926545	-1.06718	1.06718	0.166972	1
436	OG0003307	125.589	157.885	104.865	82.6335	40.2575	118.619	69.2364	82.9711	124.634	152.761	0.468093	-0.468093	-1.94716	1.94716	-0.356239	0.356239	-0.400311	0.400311	0.167865	1
509	OG0003498	206.738	212.83	145.387	155.581	469.388	431.155	209.62	329.819	160.503	172.534	-0.308867	0.308867	0.387144	-0.387144	-2.03191	2.03191	-0.329422	0.329422	0.16789	1
1180	OG0005078	1543.1	1500.62	1108.12	1015.8	439	495.125	647.624	737.001	1270.96	1348.3	0.890051	-0.890051	-1.23029	1.23029	-1.32174	1.32174	-0.604612	0.604612	0.167909	1
1532	OG0006636	76.8633	75.1421	147.249	116.461	189.535	218.932	253.376	198.515	150.043	140.043	1.32635	-1.32635	-0.817631	0.817631	1.37926	-1.37926	0.391631	-0.391631	0.168716	1
370	OG0003173	281.153	267.558	63.422	122.36	348.375	341.305	312.697	299.995	139.27	157.919	-2.06966	2.06966	0.0668785	-0.0668785	0.135255	-0.135255	-0.409393	0.409393	0.168771	1
1453	OG0005938	156.379	150.067	261.668	289.25	202.232	185.936	774.806	612.4	142.808	131.198	-0.747346	0.747346	0.626677	-0.626677	1.74762	-1.74762	0.632471	-0.632471	0.168776	1
1425	OG0005636	101.125	104.68	121.597	137.77	81.6739	27.6794	421.364	331.925	80.2489	80.3416	-0.258387	0.258387	2.04599	-2.04599	0.491984	-0.491984	-0.00239121	0.00239121	0.169904	1
928	OG0004490	157.193	130.739	212.994	193.426	189.175	74.8342	175.214	188.062	200.22	190.719	0.228289	-0.228289	2.05347	-2.05347	-0.167683	0.167683	0.115231	-0.115231	0.170048	1
1557	OG0006943	338.443	408.719	355.583	281.488	433.366	364.54	761.267	738.923	463.122	513.637	1.36415	-1.36415	1.01173	-1.01173	0.174691	-0.174691	-0.606596	0.606596	0.170473	1
1072	OG0004823	56.6811	55.3815	93.412	99.5717	463.961	424.346	147.803	118.758	59.3424	58.2292	-0.550929	0.550929	0.769761	-0.769761	1.88074	-1.88074	0.163424	-0.163424	0.171105	1
1042	OG0004756	84.4069	72.536	102.076	90.2557	121.871	141.506	219.526	169.192	96.815	83.4742	0.675056	-0.675056	-0.818856	0.818856	1.4223	-1.4223	0.812773	-0.812773	0.171172	1
746	OG0004092	154.746	224.34	759.446	662.954	438.129	514.593	739.25	1055.9	245.893	263.137	0.518572	-0.518572	-0.613515	0.613515	-1.34839	1.34839	-0.258962	0.258962	0.171799	1
1107	OG0004914	220.396	244.974	280.861	275.446	733.985	663.451	216.307	305.645	280.472	355.825	0.0935108	-0.0935108	0.484929	-0.484929	-1.64443	1.64443	-1.13775	1.13775	0.171894	1
938	OG0004516	1260.19	1448.33	383.209	370.423	908.757	694.099	643.242	631.508	1941.25	1998.41	0.23555	-0.23555	1.85942	-1.85942	0.127801	-0.127801	-0.201422	0.201422	0.17193	1
216	OG0002836	501.347	496.242	2931.67	2860.05	166.832	153.367	213.597	124.117	628.549	668.252	0.0970232	-0.0970232	0.32995	-0.32995	2.07904	-2.07904	-0.24024	0.24024	0.172672	1
1236	OG0005196	140.065	162.88	33.0478	152.901	197.739	218.956	174.172	166.612	98.2591	101.717	-2.09857	2.09857	-0.165781	0.165781	0.0722336	-0.0722336	-0.0562973	0.0562973	0.173256	1
180	OG0002762	141.904	191.547	332.167	284.262	151.752	181.901	1193.36	752.32	235.44	205.09	0.542047	-0.542047	-0.630269	0.630269	1.58105	-1.58105	0.480523	-0.480523	0.173382	1
1230	OG0005183	445.479	415.238	236.201	228.195	61.6092	67.8071	93.0279	74.0903	137.662	119.96	0.250063	-0.250063	-0.694676	0.694676	1.64371	-1.64371	0.996695	-0.996695	0.173608	1
1597	OG0008104	120.698	172.436	350.336	399.101	16.9208	68.6995	110.687	107.915	856.042	841.374	-0.217884	0.217884	-2.02499	2.02499	0.04246	-0.04246	0.0289364	-0.0289364	0.173842	1
321	OG0003063	869.022	823.853	339.011	167.964	833.292	797.665	569.578	542.628	560.176	584.815	2.10076	-2.10076	0.136016	-0.136016	0.150876	-0.150876	-0.133988	0.133988	0.173932	1
1370	OG0005512	377.385	354.208	182.177	194.425	216.654	234.583	226.675	401.181	454.154	414.793	-0.239567	0.239567	-0.292662	0.292662	-2.04724	2.04724	0.333652	-0.333652	0.174176	1
577	OG0003680	129.744	176.643	201.672	234.266	249.273	83.2306	175.877	140.004	502.723	489.975	-0.293783	0.293783	1.96221	-1.96221	0.446236	-0.446236	0.0504611	-0.0504611	0.174574	1
1309	OG0005366	536.17	574.572	592.924	838.263	783.952	752.843	946.516	984.993	564.639	581.187	-2.04577	2.04577	0.241578	-0.241578	-0.23773	0.23773	-0.172349	0.172349	0.174663	1
739	OG0004076	180.233	97.5132	223.173	184.24	58.4838	83.4139	298.732	176.464	131.328	73.953	0.387968	-0.387968	-0.713274	0.713274	1.0446	-1.0446	1.13471	-1.13471	0.174881	1
1154	OG0005017	78.4964	104.243	278.799	245.506	252.673	254.777	139.802	266.974	112.734	138.571	0.370467	-0.370467	-0.0241861	0.0241861	-1.82394	1.82394	-0.599796	0.599796	0.175544	1
885	OG0004404	327.837	371.586	545.337	583.182	831.493	768.96	623.736	466.905	525.397	511.35	-0.429572	0.429572	0.500494	-0.500494	1.84197	-1.84197	0.173557	-0.173557	0.175575	1
1545	OG0006788	99.4942	105.764	122.634	108.988	223.528	237.355	85.4531	102.953	93.9186	112.589	0.840554	-0.840554	-0.428053	0.428053	-1.32528	1.32528	-1.28994	1.28994	0.176178	1
914	OG0004463	438.139	415.888	960.666	954.734	385.894	365.746	267.33	241.172	599.374	620.254	0.099638	-0.099638	0.862519	-0.862519	1.65524	-1.65524	-0.550853	0.550853	0.176414	1
1119	OG0004944	142.717	146.375	310.098	339.376	507.749	440.592	351.281	232.159	112.574	111.667	-0.432405	0.432405	0.679254	-0.679254	1.95842	-1.95842	0.0387626	-0.0387626	0.176867	1
172	OG0002659	193.685	162.661	98.578	119.268	286.447	213.307	376.215	188.447	163.872	159.393	-0.522315	0.522315	0.804861	-0.804861	1.82875	-1.82875	0.0761903	-0.0761903	0.177389	1
165	OG0002625	318.871	276.034	295.128	264.498	94.1731	102.014	226.818	151.934	211.796	208.041	0.524796	-0.524796	-0.3832	0.3832	1.89571	-1.89571	0.0857695	-0.0857695	0.177413	1
282	OG0002985	509.706	459.105	822.262	892.936	929.848	910.844	723.391	616.082	425.85	365.774	-0.676186	0.676186	0.169432	-0.169432	1.31469	-1.31469	1.2454	-1.2454	0.177552	1
1091	OG0004872	417.144	284.065	272.784	341.385	484.835	360.866	546.19	421.088	373.778	309.737	-0.766786	0.766786	1.00631	-1.00631	0.887861	-0.887861	0.643194	-0.643194	0.177815	1
399	OG0003236	730.919	580.29	140.911	138.906	82.6281	201.686	246.464	366.163	815.398	659.135	0.0311649	-0.0311649	-1.82083	1.82083	-0.849576	0.849576	0.460798	-0.460798	0.178299	1
32	OG0001482	1035.31	988.553	1239.28	1223.73	606.911	691.428	658.628	737.253	1159.51	1111.33	0.145784	-0.145784	-1.50367	1.50367	-1.30109	1.30109	0.490036	-0.490036	0.178404	1
1592	OG0007953	211.015	257.566	149.857	144.886	298.074	265.014	530.33	406.677	45.6727	50.1214	0.196413	-0.196413	0.68383	-0.68383	1.53702	-1.53702	-0.540886	0.540886	0.178928	1
126	OG0002372	263.415	284.063	150.906	208.641	84.2152	98.1739	86.0685	125.462	168.534	131.753	-1.18415	1.18415	-0.564377	0.564377	-1.37333	1.37333	0.903258	-0.903258	0.179114	1
1034	OG0004735	400.217	426.746	228.795	254.663	119.448	118.009	214.366	256.785	169.787	161.789	-1.01051	1.01051	0.114508	-0.114508	-1.70034	1.70034	0.455551	-0.455551	0.180055	1
920	OG0004480	82.572	79.4834	130.739	157.638	111.72	107.672	271.415	724.219	98.904	91.3978	-0.424003	0.424003	0.0838589	-0.0838589	-2.06725	2.06725	0.179292	-0.179292	0.18095	1
222	OG0002844	287.267	272.553	179.328	86.7058	157.358	179.242	739.867	689.199	282.56	250.423	2.04036	-2.04036	-0.381011	0.381011	0.207785	-0.207785	0.353366	-0.353366	0.181782	1
578	OG0003682	285.436	289.056	309.33	345.139	62.7122	62.9783	93.4066	98.0171	188.16	182.245	-1.86502	1.86502	-0.0721548	0.0721548	-0.820975	0.820975	0.544393	-0.544393	0.182057	1
1419	OG0005626	584.326	672.363	115.403	180.966	765.446	889.169	637.135	718.991	556.76	466.569	-1.76305	1.76305	-0.595931	0.595931	-0.481056	0.481056	0.702412	-0.702412	0.184257	1
1163	OG0005036	284.533	263.547	76.44	115.179	226.965	199.002	181.89	194.592	302.339	343.847	-1.88228	1.88228	0.611189	-0.611189	-0.314132	0.314132	-0.598064	0.598064	0.184481	1
737	OG0004074	91.5428	89.6949	84.9635	92.1799	175.712	180.924	164.987	125.629	101.961	82.9195	-0.491404	0.491404	-0.176282	0.176282	1.63365	-1.63365	1.24238	-1.24238	0.185119	1
69	OG0001945	1122.57	1145.16	1623.4	1594.17	102.825	103.574	923.083	813.188	1679.76	1686.62	0.29717	-0.29717	-0.118577	0.118577	2.07051	-2.07051	-0.0666379	0.0666379	0.185914	1
85	OG0002021	100.106	165.052	186.68	173.509	909.954	959.931	21.4461	39.4078	230.133	242.499	0.200393	-0.200393	-0.146468	0.146468	-1.61748	1.61748	-0.143382	0.143382	0.186944	1
1523	OG0006575	419.788	355.296	238.153	202.005	393.592	377.185	451.599	244.086	376.48	434.136	0.529727	-0.529727	0.137303	-0.137303	1.92406	-1.92406	-0.458789	0.458789	0.187012	1
602	OG0003743	607.239	593.034	422.316	451.635	82.2929	73.8233	231.977	193.554	642.591	637.636	-0.639688	0.639688	1.03445	-1.03445	1.72173	-1.72173	0.0738046	-0.0738046	0.187298	1
129	OG0002385	335.181	319.028	186.331	59.4685	88.6507	54.2756	175.45	244.69	176.901	169.342	1.84415	-1.84415	0.859361	-0.859361	-0.588854	0.588854	0.07801	-0.07801	0.189244	1
1482	OG0006299	93.5836	101.205	157.552	167.993	51.9003	70.2986	287.747	290.968	55.9668	53.0678	-0.422191	0.422191	-1.98206	1.98206	-0.073268	0.073268	0.350011	-0.350011	0.189581	1
640	OG0003841	129.467	124.008	14.6452	98.3516	181.518	179.408	70.161	76.1012	77.3526	75.7349	-2.11697	2.11697	0.0167063	-0.0167063	-0.116063	0.116063	0.0301984	-0.0301984	0.191031	1
1574	OG0007113	68.9119	79.2706	98.1251	85.4468	100.235	96.6194	127.777	121.708	63.5237	67.2585	1.3721	-1.3721	0.364923	-0.364923	0.483271	-0.483271	-0.567342	0.567342	0.191107	1
1518	OG0006560	254.856	282.328	448.583	465.264	230.833	197.681	167.498	174.924	816.645	691.564	-0.303463	0.303463	1.28615	-1.28615	-0.360517	0.360517	1.37873	-1.37873	0.19176	1
117	OG0002319	899.527	831.126	1107.78	1134.22	124.128	134.142	120.771	86.9595	777.082	664.477	-0.132238	0.132238	-0.434722	0.434722	1.82488	-1.82488	0.875779	-0.875779	0.192276	1
551	OG0003622	673.013	542.932	1007.78	962.626	221.343	163.886	82.3768	92.1844	694.255	614.357	0.239793	-0.239793	1.56066	-1.56066	-0.587901	0.587901	0.638867	-0.638867	0.192813	1
1129	OG0004968	349.453	287.972	597.777	600.902	547.347	515.07	439.811	373.836	285.615	296.121	-0.04225	0.04225	0.492366	-0.492366	1.31408	-1.31408	-0.29268	0.29268	0.193517	1
1038	OG0004743	534.781	594.624	176.439	202.203	443.84	435.314	696.501	769.59	216.465	208.407	-1.417	1.417	0.201954	-0.201954	-1.03818	1.03818	0.39493	-0.39493	0.193718	1
1303	OG0005351	189	192.199	462.809	427.951	222.939	227.29	112.58	175.727	296.07	322.656	0.365752	-0.365752	-0.0903147	0.0903147	-2.0471	2.0471	-0.401604	0.401604	0.193971	1
154	OG0002539	363.521	347.044	315.854	363.424	332.623	184.518	392.895	387.309	124.957	103.56	-0.478759	0.478759	1.95793	-1.95793	0.0489516	-0.0489516	0.640139	-0.640139	0.194071	1
806	OG0004228	790.249	659.991	2159.95	1713.47	928.275	349.016	433.873	448.889	549.663	629.65	0.507759	-0.507759	1.99769	-1.99769	-0.0749306	0.0749306	-0.298766	0.298766	0.195157	1
645	OG0003860	259.541	310.558	367.458	404.971	120.263	128.185	108.839	138.363	219.681	197.355	-0.610116	0.610116	-0.400574	0.400574	-1.50037	1.50037	0.672556	-0.672556	0.195601	1
410	OG0003258	643.246	538.371	233.093	276.536	140.986	132.611	204.555	135.423	227.724	185.926	-0.695309	0.695309	0.249675	-0.249675	1.65857	-1.65857	0.82418	-0.82418	0.195786	1
213	OG0002828	87.875	104.026	109.838	140.564	415.626	387.922	104.58	125.328	323.728	312.332	-1.45983	1.45983	0.410163	-0.410163	-1.07363	1.07363	0.213155	-0.213155	0.195915	1
1088	OG0004857	121.874	141.938	71.7394	129.875	229.225	228.984	193.678	203.941	149.4	144.28	-2.04007	2.04007	0.00372282	-0.00372282	-0.182611	0.182611	0.123349	-0.123349	0.195968	1
1541	OG0006753	138.986	131.985	118.536	118.943	383.96	396.801	252.619	240.67	405.336	313.867	-0.0273586	0.0273586	-0.262211	0.262211	0.386206	-0.386206	2.02772	-2.02772	0.196182	1
950	OG0004544	349.653	362.465	467.21	494.549	56.9153	33.4788	124.084	112.091	405.529	414.021	-0.226239	0.226239	2.06353	-2.06353	0.404175	-0.404175	-0.0824699	0.0824699	0.196581	1
996	OG0004642	793.097	539.242	666.537	757.58	1018.24	742.038	970.804	750.591	423.116	426.953	-0.475344	0.475344	1.16667	-1.16667	0.951192	-0.951192	-0.0335605	0.0335605	0.197124	1
1397	OG0005576	179.618	197.411	278.54	285.168	197.35	199.256	317.005	183.601	87.9667	84.0252	-0.0917282	0.0917282	-0.0375039	0.0375039	2.0791	-2.0791	0.178795	-0.178795	0.197177	1
1245	OG0005210	146.999	147.461	143.363	193.199	202.595	142.256	433.988	248.913	296.714	257.797	-0.868129	0.868129	1.02583	-1.02583	1.58891	-1.58891	0.411466	-0.411466	0.197995	1
1467	OG0006117	285.026	309.907	458.815	461.419	157.36	231.667	466.039	420.952	287.386	330.948	-0.0280526	0.0280526	-1.89357	1.89357	0.503918	-0.503918	-0.698423	0.698423	0.198083	1
1398	OG0005581	825.685	1016.77	892.181	871.695	385.133	382.373	269.142	364.723	1046.29	1087.56	0.13358	-0.13358	0.0413639	-0.0413639	-1.73436	1.73436	-0.222433	0.222433	0.198791	1
1340	OG0005440	418.365	461.494	127.993	102.099	547.347	507.424	1165.19	1115.08	475.867	518.167	1.74138	-1.74138	0.585684	-0.585684	0.340065	-0.340065	-0.658474	0.658474	0.199758	1
1310	OG0005372	381.664	359.855	474.722	458.521	560.761	600.778	616.019	485.391	209.71	198.278	0.280751	-0.280751	-0.557176	0.557176	1.9181	-1.9181	0.453179	-0.453179	0.200066	1
1351	OG0005467	375.957	413.499	276.566	307.23	84.6969	69.8672	66.2325	146.775	518.643	597.218	-0.276691	0.276691	0.505429	-0.505429	-1.99189	1.99189	-0.370948	0.370948	0.200177	1
1313	OG0005378	294.403	263.864	949.812	989.412	36.8249	71.6103	109.503	91.6834	95.8484	117.011	-0.122993	0.122993	-1.93214	1.93214	0.533459	-0.533459	-0.598815	0.598815	0.200813	1
1070	OG0004819	1171.09	1015.29	38.7884	104.679	328.425	256.883	480.714	665.855	829.025	843.218	-1.92145	1.92145	0.511367	-0.511367	-0.675558	0.675558	-0.0355106	0.0355106	0.201821	1
850	OG0004313	533.354	513.401	172.8	196.804	700.77	587.714	86.3052	24.1936	245.893	249.317	-0.240445	0.240445	0.324857	-0.324857	2.08111	-2.08111	-0.0255985	0.0255985	0.202143	1
1427	OG0005638	209.386	278.849	266.244	238.64	351.631	373.884	107.985	170.494	364.094	392.496	0.420803	-0.420803	-0.236066	0.236066	-1.72761	1.72761	-0.288933	0.288933	0.202712	1
1185	OG0005091	172.484	165.921	354.502	274.713	505.068	362.027	705.58	786.815	1117.37	1162.6	1.24045	-1.24045	1.61372	-1.61372	-0.532472	0.532472	-0.194034	0.194034	0.203342	1
419	OG0003271	395.328	405.029	1142.19	1133.93	281.819	286.974	312.602	445.341	440.163	436.717	0.0437954	-0.0437954	-0.10933	0.10933	-2.11246	2.11246	0.0473962	-0.0473962	0.203477	1
937	OG0004515	498.084	422.403	131.723	156.616	33.1341	51.7877	275.486	294.753	140.074	118.115	-0.688113	0.688113	-1.75073	1.75073	-0.269302	0.269302	0.677866	-0.677866	0.203723	1
917	OG0004472	397.159	536.856	511.674	416.14	199.654	220.587	219.147	503.619	974.29	1142.21	0.492544	-0.492544	-0.238284	0.238284	-1.88274	1.88274	-0.379521	0.379521	0.204144	1
143	OG0002487	2372.32	2647.88	1832.72	1568.95	1473.67	1698.31	274.065	531.264	1746.09	1836.36	0.481556	-0.481556	-0.439821	0.439821	-1.98342	1.98342	-0.156499	0.156499	0.205916	1
664	OG0003903	233.238	250.831	76.0121	87.9519	1441.09	1494.76	232.025	247.941	147.631	137.648	-1.60337	1.60337	-0.402504	0.402504	-0.730148	0.730148	0.770515	-0.770515	0.206785	1
1315	OG0005381	62.7955	64.9349	71.071	90.074	252.185	191.81	100.555	49.3924	59.1816	56.018	-0.646221	0.646221	0.745173	-0.745173	1.86977	-1.86977	0.150489	-0.150489	0.207062	1
528	OG0003567	111.321	103.809	154.882	156.574	93.5052	87.6888	86.5401	42.2565	50.0165	52.5187	-0.0331196	0.0331196	0.195687	-0.195687	2.09599	-2.09599	-0.148767	0.148767	0.207237	1
1336	OG0005432	399.81	412.632	272.69	301.077	491.377	520.273	694.419	679.516	385.322	378.857	-1.72495	1.72495	-0.995869	0.995869	0.37816	-0.37816	0.294969	-0.294969	0.207295	1
628	OG0003800	108.667	100.332	88.3429	96.1224	103.379	105.733	174.505	141.714	104.533	85.5012	-0.574162	0.574162	-0.153206	0.153206	1.41177	-1.41177	1.36345	-1.36345	0.207755	1
60	OG0001802	404.501	484.947	970.935	872.25	122.785	126.995	138.762	269.454	695.064	759.191	0.333795	-0.333795	-0.105061	0.105061	-1.996	1.996	-0.274919	0.274919	0.20776	1
1516	OG0006551	322.337	382.445	500.83	441.051	313.58	308.613	319.042	244.389	165.163	182.245	0.760527	-0.760527	0.0956504	-0.0956504	1.58772	-1.58772	-0.589178	0.589178	0.208221	1
1431	OG0005644	195.113	184.378	237.6	240.35	430.971	428.314	200.637	192.482	188.321	186.85	-0.34003	0.34003	0.182754	-0.182754	1.22596	-1.22596	0.231827	-0.231827	0.20927	1
650	OG0003872	311.735	366.155	202.2	211.646	152.894	131.733	109.599	193.52	203.702	233.654	-0.158058	0.158058	0.514867	-0.514867	-1.91728	1.91728	-0.474259	0.474259	0.210252	1
773	OG0004149	62.3877	78.6169	158.68	120.641	99.0438	116.613	268.763	184.305	56.9301	56.7551	1.0679	-1.0679	-0.638831	0.638831	1.46177	-1.46177	0.0120725	-0.0120725	0.211683	1
409	OG0003256	293.177	215.76	110.887	130.56	523.166	333.765	262.087	168.717	141.682	152.575	-0.485065	0.485065	1.31579	-1.31579	1.29026	-1.29026	-0.220386	0.220386	0.211931	1
949	OG0004542	271.366	241.712	225.122	245.684	682.937	464.916	526.306	470.38	325.817	326.896	-0.439311	0.439311	1.91054	-1.91054	0.564421	-0.564421	-0.0166321	0.0166321	0.212518	1
1272	OG0005280	197.765	215.653	0	174.713	130.979	126.272	233.635	260.038	211.959	194.405	-2.114	2.114	0.0386818	-0.0386818	-0.113062	0.113062	0.09132	-0.09132	0.212614	1
136	OG0002441	138.232	131.827	102.423	107.577	49.2892	53.4888	65.0007	36.2585	95.686	82.1806	-0.174349	0.174349	-0.290273	0.290273	2.01643	-2.01643	0.5394	-0.5394	0.212912	1
884	OG0004403	274.63	226.947	21.5009	128.535	62.7122	74.8422	222.746	216.341	294.459	254.661	-2.07636	2.07636	-0.256661	0.256661	0.0424572	-0.0424572	0.210946	-0.210946	0.212988	1
1565	OG0007055	466.285	328.019	90.27	100.883	367.467	394.293	57.8051	40.6812	242.355	176.162	-0.392864	0.392864	-0.249193	0.249193	1.23035	-1.23035	1.11918	-1.11918	0.21306	1
1132	OG0004976	162.695	166.357	215.768	240.804	140.563	134.21	403.878	165.389	142.647	133.778	-0.274021	0.274021	0.115525	-0.115525	2.09351	-2.09351	0.160331	-0.160331	0.21336	1
852	OG0004318	585.548	396.561	1009.2	1021.33	37.8419	60.907	45.5434	52.9126	439.518	386.596	-0.0398095	0.0398095	-1.55656	1.55656	-0.498796	0.498796	0.426913	-0.426913	0.213821	1
1108	OG0004915	692.995	950.046	446.29	421.426	736.534	688.505	503.297	753.728	876.949	1027.12	0.225998	-0.225998	0.265813	-0.265813	-1.57127	1.57127	-0.622025	0.622025	0.214456	1
677	OG0003938	176.765	201.539	64.7713	100.837	333.712	288.673	136.82	199.452	193.788	179.479	-1.51397	1.51397	0.503074	-0.503074	-1.29481	1.29481	0.266494	-0.266494	0.215437	1
1589	OG0007887	308.187	289.712	542.56	534.104	988.863	1263.43	1436.04	1837.25	82.6612	73.7079	0.0901229	-0.0901229	-1.39877	1.39877	-1.40641	1.40641	0.656982	-0.656982	0.215544	1
1274	OG0005284	166.979	72.9704	415.557	513.972	257.277	164.876	269.757	128.611	294.461	320.629	-0.385207	0.385207	0.796341	-0.796341	1.28907	-1.28907	-0.154788	0.154788	0.21573	1
1175	OG0005064	264.228	295.573	305.694	347.268	451.785	473.007	312.555	341.433	304.753	280.459	-1.2656	1.2656	-0.456146	0.456146	-0.877738	0.877738	0.825203	-0.825203	0.216365	1
83	OG0002009	191.855	178.732	239.536	232.569	229.548	258.748	254.324	156.927	143.453	128.618	0.123649	-0.123649	-0.501001	0.501001	1.98419	-1.98419	0.456801	-0.456801	0.216385	1
226	OG0002853	678.925	702.774	851.315	865.738	1151.11	1034.38	709.636	748.487	451.742	384.753	-0.175187	0.175187	1.11405	-1.11405	-0.555724	0.555724	1.67026	-1.67026	0.216513	1
560	OG0003640	53.4169	57.336	65.7676	90.0772	699.08	434.686	69.8769	38.8059	83.9494	78.8675	-0.82042	0.82042	1.22653	-1.22653	1.50364	-1.50364	0.164165	-0.164165	0.21694	1
570	OG0003657	120.902	161.79	200.223	214.829	350.703	317.778	458.321	337.077	166.931	168.793	-0.34126	0.34126	0.477633	-0.477633	1.47821	-1.47821	-0.0537925	0.0537925	0.217308	1
541	OG0003595	129.259	122.269	201.144	199.779	405.256	439.409	111.302	90.9127	128.012	114.433	0.0576049	-0.0576049	-0.684074	0.684074	1.70582	-1.70582	0.947553	-0.947553	0.217794	1
1277	OG0005288	355.567	335.966	279.499	259.199	129.625	121.781	78.1576	141.04	394.331	459.569	0.264512	-0.264512	0.219008	-0.219008	-2.01368	2.01368	-0.536278	0.536278	0.218564	1
124	OG0002367	770.874	884.331	654.428	695.334	430.159	402.313	502.445	745.331	854.756	859.806	-0.304299	0.304299	0.33586	-0.33586	-1.95449	1.95449	-0.0295774	0.0295774	0.221493	1
1015	OG0004684	903.603	1029.84	221.124	182.552	2457.69	2872.74	1268.59	2424.77	1226.13	1311.38	0.588622	-0.588622	-0.47967	0.47967	-1.92843	1.92843	-0.206976	0.206976	0.221565	1
1539	OG0006705	3092.68	2630.63	4180.83	4381.89	3120.72	3110.48	3050.94	2764.04	2554.13	2377.26	-0.47947	0.47947	0.0335661	-0.0335661	1.00746	-1.00746	0.732378	-0.732378	0.223606	1
353	OG0003138	275.852	207.62	173.16	230.57	352.085	241.393	547.988	383.857	233.026	201.775	-0.904938	0.904938	1.18695	-1.18695	1.1209	-1.1209	0.457389	-0.457389	0.22427	1
237	OG0002889	250.568	231.511	370.747	339.824	299.505	322.114	305.171	249.683	294.781	292.438	0.758926	-0.758926	-0.634275	0.634275	1.74403	-1.74403	0.0695723	-0.0695723	0.225288	1
115	OG0002313	130.69	128.35	414.486	460.689	168.533	162.643	103.254	80.6918	162.106	146.312	-0.775548	0.775548	0.26127	-0.26127	1.80186	-1.80186	0.752291	-0.752291	0.226749	1
84	OG0002016	788.817	1091.51	890.76	735.301	354.861	422.189	457.185	725.827	684.77	734.684	0.656733	-0.656733	-0.595192	0.595192	-1.55989	1.55989	-0.241553	0.241553	0.228065	1
62	OG0001815	321.331	347.324	183.164	397.427	121.07	107.841	139.849	157.196	527.81	521.117	-2.05948	2.05948	0.322518	-0.322518	-0.325899	0.325899	0.0356083	-0.0356083	0.228301	1
298	OG0003018	366.987	373.324	122.168	196.22	809.744	770.219	494.397	639.036	350.104	303.859	-1.78875	1.78875	0.192399	-0.192399	-0.981438	0.981438	0.54386	-0.54386	0.229092	1
1317	OG0005388	440.586	414.804	391.976	328.529	767.604	358.103	279.792	302.925	1065.77	1175.18	0.490645	-0.490645	2.02685	-2.02685	-0.221193	0.221193	-0.272039	0.272039	0.230213	1
1333	OG0005419	946.216	988.353	453.602	443.131	301.53	305.068	373.721	378.998	269.693	236.971	0.355143	-0.355143	-0.17738	0.17738	-0.213231	0.213231	1.96421	-1.96421	0.230309	1
1214	OG0005151	76.0478	38.0054	82.0807	138.182	129.157	49.7598	125.128	39.5076	56.6069	57.8589	-0.67347	0.67347	1.17338	-1.17338	1.37511	-1.37511	-0.0289209	0.0289209	0.230419	1
406	OG0003252	691.976	444.989	723.881	950.114	211.685	145.885	390.622	262.183	642.638	586.162	-0.765816	0.765816	1.04278	-1.04278	1.1149	-1.1149	0.260439	-0.260439	0.230688	1
378	OG0003191	173.095	179.603	385.329	164.852	557.664	552.567	918.967	819.991	282.238	324.683	2.06736	-2.06736	0.0236812	-0.0236812	0.293629	-0.293629	-0.360788	0.360788	0.231453	1
1196	OG0005117	757.367	763.841	1142.83	1334.37	1678.58	1440.68	1318.54	2101.67	696.191	712.757	-0.646443	0.646443	0.637619	-0.637619	-1.91432	1.91432	-0.0983023	0.0983023	0.232559	1
1322	OG0005396	100.917	120.529	93.6744	72.1656	71.5275	81.4897	49.0946	83.5063	115.127	142.258	0.83967	-0.83967	-0.421499	0.421499	-1.68013	1.68013	-0.682429	0.682429	0.233134	1
1563	OG0007036	446.292	432.171	558.539	574.94	142.848	78.2399	104.911	99.3572	459.624	482.604	-0.103946	0.103946	2.09929	-2.09929	0.195327	-0.195327	-0.175208	0.175208	0.233425	1
311	OG0003046	93.3777	108.585	128.075	159.725	213.866	185.534	180.138	128.545	133.803	111.299	-0.959122	0.959122	0.618659	-0.618659	1.45769	-1.45769	0.800772	-0.800772	0.233787	1
1579	OG0007495	204.291	201.969	223.66	248.358	281.093	260.222	130.146	99.8927	86.5209	82.5529	-0.746574	0.746574	0.550138	-0.550138	1.87648	-1.87648	0.33487	-0.33487	0.233966	1
1023	OG0004699	331.511	359.855	641.076	629.353	853.757	778.008	813.247	721.358	423.756	454.962	0.209047	-0.209047	1.0517	-1.0517	1.35656	-1.35656	-0.804557	0.804557	0.233998	1
164	OG0002623	156.049	145.721	402.036	424.087	511.747	420.335	296.602	207.361	272.589	300.732	-0.266126	0.266126	0.977815	-0.977815	1.76553	-1.76553	-0.489419	0.489419	0.234598	1
980	OG0004602	940.705	1121.49	974.03	902.57	882.931	981.659	561.733	733.299	982.768	969.078	0.470004	-0.470004	-0.653531	0.653531	-1.63516	1.63516	0.0865683	-0.0865683	0.234665	1
176	OG0002668	1054.47	1342.13	194.317	254.721	66.701	61.2169	185.913	196.301	1030.21	1068.4	-1.51644	1.51644	0.4833	-0.4833	-0.306386	0.306386	-0.205124	0.205124	0.236828	1
1190	OG0005103	194.097	207.184	175.615	194.338	672.549	637.568	457.422	379.501	142.004	130.832	-0.885996	0.885996	0.467428	-0.467428	1.62994	-1.62994	0.716856	-0.716856	0.237773	1
337	OG0003100	525.81	465.618	830.567	484.97	47.9627	70.929	887.723	534.622	338.525	291.146	1.32347	-1.32347	-0.973161	0.973161	1.25066	-1.25066	0.379067	-0.379067	0.238081	1
995	OG0004641	293.557	370.616	185.99	163.492	455.488	491.769	58.1843	93.828	368.745	387.521	0.499752	-0.499752	-0.297339	0.297339	-1.82029	1.82029	-0.192741	0.192741	0.238379	1
1041	OG0004753	170.241	161.143	94.2429	107.1	73.9571	102.334	187.618	177.335	92.9537	87.7124	-0.75281	0.75281	-1.89768	1.89768	0.332161	-0.332161	0.342015	-0.342015	0.238404	1
1548	OG0006813	61.774	50.5993	355.011	352.379	95.0062	111.114	537.43	385.691	105.337	84.3955	0.0336018	-0.0336018	-0.705514	0.705514	1.48399	-1.48399	0.996446	-0.996446	0.239378	1
1	OG0000660	356.585	339.225	364.737	406.889	87.2731	66.3278	64.3862	57.4697	208.422	204.34	-0.725383	0.725383	1.81073	-1.81073	0.753704	-0.753704	0.131311	-0.131311	0.239714	1
727	OG0004051	279.927	325.548	237.918	267.357	450.282	442.914	361.413	348.973	381.303	407.236	-1.20454	1.20454	0.170547	-0.170547	0.362033	-0.362033	-0.679935	0.679935	0.240574	1
97	OG0002098	6163.24	5017.55	3500.37	3746.58	3552.63	3235.94	2336.02	2348.08	7743.09	6455.66	-0.485262	0.485262	0.666316	-0.666316	-0.0367841	0.0367841	1.29506	-1.29506	0.241454	1
791	OG0004191	613.63	492.811	178.647	173.558	131.368	102.041	168.112	166.813	164.038	171.924	0.181625	-0.181625	1.57923	-1.57923	0.0487704	-0.0487704	-0.295029	0.295029	0.241999	1
1374	OG0005517	2260.03	2760.27	4931.49	4347.51	2877.33	2300.65	1448.18	1648.56	4518.17	4281.14	0.755758	-0.755758	1.3374	-1.3374	-0.77703	0.77703	0.323479	-0.323479	0.242185	1
711	OG0004019	272.388	296.661	217.411	122.85	118.441	122.939	1361.19	1114.48	640.223	742.056	1.91514	-1.91514	-0.128435	0.128435	0.686732	-0.686732	-0.507689	0.507689	0.242389	1
1350	OG0005465	801.664	1061.11	750.451	817.561	151.619	124.645	669.8	1117.56	471.684	538.805	-0.290123	0.290123	0.661844	-0.661844	-1.69814	1.69814	-0.450266	0.450266	0.242625	1
747	OG0004094	175.336	130.089	102.32	113.998	283.427	288.968	292.575	200.559	143.451	124.563	-0.45011	0.45011	-0.0807061	0.0807061	1.55569	-1.55569	0.587568	-0.587568	0.242827	1
1035	OG0004737	292.57	274.288	1053.12	1107.32	94.7037	73.3696	330.918	325.696	471.204	460.122	-0.39683	0.39683	2.00775	-2.00775	0.125804	-0.125804	0.188227	-0.188227	0.242861	1
1138	OG0004988	230.998	203.055	537.875	565.971	208.513	191.391	180.139	166.78	214.856	213.569	-0.599296	0.599296	1.00811	-1.00811	0.906684	-0.906684	0.0707767	-0.0707767	0.243304	1
506	OG0003489	356.999	347.044	308.505	534.457	271.363	380.586	651.621	546.682	315.528	291.146	-1.71912	1.71912	-1.07448	1.07448	0.561652	-0.561652	0.257755	-0.257755	0.244792	1
649	OG0003867	147.392	153.863	616.679	671.763	1679.57	1872.75	407.345	402.551	404.3	386.047	-1.1893	1.1893	-1.51281	1.51281	0.164648	-0.164648	0.642474	-0.642474	0.245072	1
1522	OG0006570	227.328	215.434	102.966	110.562	158.838	178.253	251.436	250.32	137.66	131.198	-0.983518	0.983518	-1.59241	1.59241	0.0615099	-0.0615099	0.664491	-0.664491	0.245085	1
428	OG0003291	311.476	348.853	243.362	234.707	315.046	295.076	1550.23	3572.31	410.112	432.002	0.0956862	-0.0956862	0.172992	-0.172992	-2.08628	2.08628	-0.137381	0.137381	0.245141	1
1186	OG0005094	197.765	233.027	83.8047	96.2035	76.6263	60.0352	175.498	121.54	137.177	142.809	-0.598582	0.598582	1.05503	-1.05503	1.57862	-1.57862	-0.174797	0.174797	0.245172	1
365	OG0003162	132.319	139.206	79.5633	95.0062	95.6857	83.5534	90.1868	108.573	132.999	139.308	-1.26105	1.26105	0.964907	-0.964907	-1.31867	1.31867	-0.330252	0.330252	0.245347	1
1297	OG0005338	1719.12	1932.16	1909.29	1898.85	280.19	319.734	1387.7	1544.58	1428.72	1339.46	0.0538556	-0.0538556	-1.29498	1.29498	-1.05106	1.05106	0.633544	-0.633544	0.246087	1
170	OG0002654	490.633	515.253	446.971	468.823	1010.94	842.2	125.836	225.421	632.823	725.839	-0.164639	0.164639	0.628273	-0.628273	-1.95615	1.95615	-0.472364	0.472364	0.246113	1
1552	OG0006863	128.445	137.903	111.309	83.7595	166.443	189.943	1021.44	479.63	91.3455	104.295	0.748461	-0.748461	-0.34946	0.34946	1.91291	-1.91291	-0.350782	0.350782	0.246723	1
1381	OG0005529	306.538	351.819	286.539	285.745	114.976	103.366	564.226	514.982	193.305	205.092	0.0286853	-0.0286853	1.09984	-1.09984	0.943854	-0.943854	-0.612002	0.612002	0.246741	1
78	OG0001998	130.076	103.375	207.276	262.123	343.942	309.074	444.261	282.623	129.781	107.247	-0.835212	0.835212	0.381673	-0.381673	1.5895	-1.5895	0.679566	-0.679566	0.247095	1
335	OG0003098	221.005	255.177	159.086	193.968	269.636	268.147	451.361	428.195	235.98	249.993	-1.63441	1.63441	0.0457984	-0.0457984	0.435692	-0.435692	-0.477007	0.477007	0.247315	1
479	OG0003423	364.334	316.205	345.089	317.11	76.0725	88.9499	451.316	350.481	330.484	290.225	0.49414	-0.49414	-0.912648	0.912648	1.47083	-1.47083	0.758564	-0.758564	0.247365	1
1562	OG0007023	118.663	142.905	349.83	364.375	716.834	521.79	362.906	385.331	261.653	236.973	-0.224143	0.224143	1.73312	-1.73312	-0.329857	0.329857	0.544775	-0.544775	0.24748	1
1067	OG0004815	188.389	179.815	237.587	251.876	511.323	446.441	875.501	716.302	143.61	149.996	-0.48269	0.48269	1.12014	-1.12014	1.65371	-1.65371	-0.359608	0.359608	0.248009	1
760	OG0004117	191.037	160.491	67.423	129.901	317.192	305.523	131.374	118.424	191.698	214.304	-1.98981	1.98981	0.117761	-0.117761	0.3258	-0.3258	-0.349902	0.349902	0.248524	1
810	OG0004239	367.598	321.417	344.617	396.243	180.566	149.497	371.969	312.816	442.736	420.688	-0.9111	0.9111	1.23078	-1.23078	1.12944	-1.12944	0.333878	-0.333878	0.24973	1
277	OG0002970	345.379	314.027	53.5555	105.98	499.005	445.86	313.833	342.569	457.53	452.198	-2.05239	2.05239	0.3513	-0.3513	-0.273424	0.273424	0.0366062	-0.0366062	0.24992	1
53	OG0001725	122.533	156.799	118.214	101.489	112.292	136.705	439.81	572.287	347.533	357.483	0.738704	-0.738704	-0.951392	0.951392	-1.27017	1.27017	-0.136962	0.136962	0.249968	1
530	OG0003571	48.3179	48.2126	233.624	229.291	205.953	168.546	275.107	304.769	95.8484	85.1326	0.156041	-0.156041	1.66538	-1.66538	-0.852823	0.852823	0.98718	-0.98718	0.250285	1
1033	OG0004731	81.9583	73.6197	141.227	132.968	60.1244	31.3334	108.178	122.044	89.8965	87.7142	0.195651	-0.195651	2.04477	-2.04477	-0.391218	0.391218	0.0798076	-0.0798076	0.250373	1
1373	OG0005516	54.2345	55.8136	78.8355	94.0295	87.1311	80.8785	252.713	204.579	69.474	55.467	-1.02695	1.02695	0.434819	-0.434819	1.22983	-1.22983	1.30986	-1.30986	0.250882	1
513	OG0003529	186.755	164.185	329.366	241.927	61.6417	52.752	120.77	138.262	194.913	192.378	1.66111	-1.66111	0.843409	-0.843409	-0.732887	0.732887	0.0710562	-0.0710562	0.25152	1
794	OG0004199	192.668	186.118	258.76	303.329	488.196	424.905	524.032	383.756	203.273	191.825	-0.885176	0.885176	0.773789	-0.773789	1.72506	-1.72506	0.323461	-0.323461	0.253211	1
1090	OG0004861	199.192	210.443	123.399	189.068	551.415	452.833	476.265	587.631	204.575	211.68	-1.73789	1.73789	0.811756	-0.811756	-0.865604	0.865604	-0.141138	0.141138	0.253527	1
1280	OG0005299	604.301	819.401	87.559	91.492	324.173	308.432	259.153	671.907	183.495	172.108	-0.099012	0.099012	0.112158	-0.112158	-1.99825	1.99825	0.14434	-0.14434	0.25364	1
96	OG0002096	693.238	635.276	245.396	227.922	523.387	333.398	618.716	624.224	694.919	759.368	0.3357	-0.3357	2.0164	-2.0164	-0.0402938	0.0402938	-0.402987	0.402987	0.253789	1
894	OG0004427	77.0672	75.1421	129.568	127.247	55.633	61.3429	133.599	107.534	113.542	102.823	0.148038	-0.148038	-0.799748	0.799748	1.77107	-1.77107	0.81171	-0.81171	0.254552	1
1406	OG0005596	427.741	582.028	201.273	246.21	785.842	173.749	320.886	261.245	432.442	470.255	-0.316666	0.316666	2.01141	-2.01141	0.323071	-0.323071	-0.132088	0.132088	0.255663	1
929	OG0004492	413.671	467.792	487.196	448.202	231.515	185.558	218.392	222.104	457.691	487.946	0.645916	-0.645916	1.70732	-1.70732	-0.130587	0.130587	-0.495744	0.495744	0.256839	1
722	OG0004044	43.4268	52.1217	112.296	118.794	127.919	95.0686	316.367	363.316	83.3045	60.6266	-0.242789	0.242789	1.2719	-1.2719	-0.596361	0.596361	1.36031	-1.36031	0.25733	1
808	OG0004235	190.427	161.358	85.7193	99.0979	353.421	306.727	299.63	238.591	79.4448	74.9978	-0.875522	0.875522	0.85549	-0.85549	1.37165	-1.37165	0.34826	-0.34826	0.258205	1
1343	OG0005455	493.393	450.642	405.112	483.708	273.434	253.437	296.554	184.004	442.899	400.42	-0.715666	0.715666	0.307173	-0.307173	1.89551	-1.89551	0.407668	-0.407668	0.259199	1
573	OG0003669	386.251	395.562	145.64	178.376	285.433	340.297	273.924	329.504	473.773	383.467	-1.10501	1.10501	-0.95898	0.95898	-1.00739	1.00739	1.15217	-1.15217	0.259414	1
437	OG0003308	227.124	195.891	77.8704	99.6755	66.0471	33.8611	272.55	248.845	333.54	285.434	-0.715922	0.715922	1.87795	-1.87795	0.265031	-0.265031	0.453048	-0.453048	0.260193	1
92	OG0002067	152.501	157.668	326.371	360.611	168.021	153.892	316.626	208.231	128.173	129.357	-0.485834	0.485834	0.427815	-0.427815	2.0131	-2.0131	-0.0448227	0.0448227	0.26136	1
250	OG0002918	538.477	550.883	289.665	468.882	842.077	589.341	215.219	305.545	334.505	396.735	-1.4207	1.4207	1.06172	-1.06172	-1.04298	1.04298	-0.511738	0.511738	0.26169	1
1494	OG0006364	254.036	322.722	183.354	178.788	398.402	390.429	152.347	213.291	434.856	440.773	0.130081	-0.130081	0.104297	-0.104297	-1.71975	1.71975	-0.0697248	0.0697248	0.263651	1
1076	OG0004830	1267.94	1537.15	966.925	948.877	1419.8	1412.27	1692.07	3237.09	1656.6	1594.85	0.060831	-0.060831	0.0171842	-0.0171842	-2.02408	2.02408	0.122626	-0.122626	0.26396	1
734	OG0004061	660.674	713.22	888.492	881.06	1258.52	1172.53	301.619	389.487	1392.29	1493.69	0.0627949	-0.0627949	0.528828	-0.528828	-1.90091	1.90091	-0.525333	0.525333	0.264377	1
1093	OG0004875	1858.99	1845.11	1507.4	1599.67	396.229	128.295	577.166	590.807	1892.36	1929.49	-0.123057	0.123057	2.11676	-2.11676	-0.048397	0.048397	-0.0402519	0.0402519	0.264387	1
624	OG0003789	167.794	159.186	102.67	88.4321	52.5426	64.4451	252.289	146.07	167.091	158.474	0.531578	-0.531578	-0.725939	0.725939	1.90249	-1.90249	0.188864	-0.188864	0.264562	1
130	OG0002390	82.7963	73.4134	275.189	275.122	448.441	395.746	50.7042	51.5049	262.781	261.844	0.00297579	-0.00297579	1.52202	-1.52202	-0.191013	0.191013	0.0435525	-0.0435525	0.264632	1
502	OG0003478	154.542	171.569	291.308	278.672	52.0725	33.3103	226.344	260.105	183.979	170.634	0.195728	-0.195728	1.93995	-1.93995	-0.612713	0.612713	0.332241	-0.332241	0.26565	1
1515	OG0006550	229.163	276.46	249.946	258.381	589.388	576.047	420.59	462.17	257.951	254.843	-0.329518	0.329518	0.227306	-0.227306	-0.935342	0.935342	0.120357	-0.120357	0.266068	1
612	OG0003759	402.258	424.579	279.743	252.622	91.0221	67.3565	310.661	346.057	605.003	601.827	0.639428	-0.639428	1.87551	-1.87551	-0.676523	0.676523	0.0330336	-0.0330336	0.267016	1
243	OG0002908	226.51	189.59	1302.85	1137.05	49.8012	80.9188	32.7146	50.7365	105.657	89.3708	0.411401	-0.411401	-1.44121	1.44121	-1.30747	1.30747	0.50557	-0.50557	0.267684	1
1334	OG0005421	1166.39	1076.74	1276.27	1173.03	181.614	111.24	161.069	175.659	3007.63	3115.07	0.355388	-0.355388	2.02603	-2.02603	-0.365309	0.365309	-0.14794	0.14794	0.268034	1
355	OG0003143	843.25	868.695	95.2017	90.8365	151	144.466	399.098	416.495	2725.25	4521.98	0.198023	-0.198023	0.186638	-0.186638	-0.18002	0.18002	-2.09232	2.09232	0.268377	1
76	OG0001995	419.992	491.245	75.0064	245.516	97.3497	88.5923	215.881	207.461	858.94	876.203	-2.08899	2.08899	0.184945	-0.184945	0.0781043	-0.0781043	-0.0390672	0.0390672	0.270119	1
565	OG0003649	152.505	179.82	364.659	378.542	422.158	375.398	343.894	325.784	288.029	292.071	-0.372403	0.372403	1.16887	-1.16887	0.53914	-0.53914	-0.138909	0.138909	0.270262	1
217	OG0002837	425.55	476.431	550.159	486.115	532.637	550.581	123.706	226.865	1207.55	1254.03	0.427103	-0.427103	-0.114478	0.114478	-2.03358	2.03358	-0.130494	0.130494	0.270496	1
1603	OG0009092	217.136	238.455	208.672	238.309	108.508	202.166	119.632	108.669	199.899	184.452	-0.441733	0.441733	-2.0084	2.0084	0.319914	-0.319914	0.26774	-0.26774	0.270672	1
1415	OG0005622	445.891	629.148	392.269	316.305	965.526	1073.44	300.53	477.731	478.615	540.491	0.723222	-0.723222	-0.357028	0.357028	-1.536	1.536	-0.409592	0.409592	0.271638	1
966	OG0004579	193.078	160.055	138.194	146.606	90.8941	90.9685	171.189	128.477	180.119	174.133	-0.360425	0.360425	-0.00498897	0.00498897	1.73934	-1.73934	0.206215	-0.206215	0.273084	1
260	OG0002944	647.028	733.385	615.249	552.68	1354.69	1409.13	523.891	1115.01	1019.06	1010.07	0.306719	-0.306719	-0.112779	0.112779	-2.06501	2.06501	0.0253585	-0.0253585	0.273621	1
269	OG0002959	262.801	274.942	195.954	174.317	442.148	451.864	753.692	795.06	141.682	127.33	1.42171	-1.42171	-0.264394	0.264394	-0.649869	0.649869	1.29799	-1.29799	0.274599	1
778	OG0004156	60.3489	70.5814	6397.94	5509.28	25.1333	89.8101	42.5135	56.4979	138.789	112.036	0.264002	-0.264002	-1.99045	1.99045	-0.499626	0.499626	0.377299	-0.377299	0.275895	1
339	OG0003103	594.724	580.505	744.673	732.222	418.707	425.5	620.564	627.04	699.565	633.151	0.338433	-0.338433	-0.323011	0.323011	-0.208357	0.208357	2.00046	-2.00046	0.278153	1
1326	OG0005405	79.5158	89.6949	156.328	159.063	40.9347	59.2524	69.5455	63.8359	84.4302	87.1596	-0.0928967	0.0928967	-1.95875	1.95875	0.458597	-0.458597	-0.170406	0.170406	0.279862	1
37	OG0001528	421.87	457.068	402.558	301.191	351.17	334.141	300.77	277.35	295.265	336.663	1.79733	-1.79733	0.310079	-0.310079	0.505494	-0.505494	-0.817452	0.817452	0.280877	1
1251	OG0005229	246.9	265.823	132.872	81.7088	219.472	276.725	261.898	216.608	288.825	273.068	1.77422	-1.77422	-0.858584	0.858584	0.704286	-0.704286	0.208682	-0.208682	0.28184	1
1146	OG0005002	496.655	461.926	331.508	425.625	210.871	146.983	116.462	231.373	394.001	456.62	-0.65275	0.65275	0.937486	-0.937486	-1.73477	1.73477	-0.386567	0.386567	0.281867	1
50	OG0001696	154.33	121.626	67.1981	88.338	137.672	107.999	134.169	93.9956	114.021	99.8742	-1.00391	1.00391	0.892141	-0.892141	1.30051	-1.30051	0.48852	-0.48852	0.282649	1
7	OG0001094	108.465	89.4756	334.819	368.616	101.061	117.388	80.1039	33.6105	80.2505	67.8113	-0.233009	0.233009	-0.362466	0.362466	1.98289	-1.98289	0.407451	-0.407451	0.28314	1
299	OG0003020	186.35	175.696	122.181	160.977	66.2542	34.0073	227.575	205.483	181.084	155.341	-0.801381	0.801381	1.88118	-1.88118	0.298381	-0.298381	0.447557	-0.447557	0.285441	1
1511	OG0006520	303.987	251.051	526.403	421.572	691.445	526.857	634.212	597.228	557.397	681.614	1.04359	-1.04359	1.27491	-1.27491	0.283426	-0.283426	-0.946104	0.946104	0.28638	1
1400	OG0005583	391.047	402.855	353.019	366.137	104.887	107.777	238.843	295.708	355.41	328.922	-0.332373	0.332373	-0.247551	0.247551	-1.93839	1.93839	0.705285	-0.705285	0.286542	1
82	OG0002007	366.377	334.013	310.036	312.042	93.3702	54.1031	81.9971	92.6217	467.985	436.531	-0.0245006	0.0245006	2.02303	-2.02303	-0.462282	0.462282	0.264203	-0.264203	0.287243	1
107	OG0002234	182.272	234.115	153.795	192.985	143.609	126.173	233.966	131.76	147.369	137.231	-0.716915	0.716915	0.409987	-0.409987	1.77286	-1.77286	0.225965	-0.225965	0.288022	1
863	OG0004346	187.775	181.127	332.802	335.891	262.112	287.642	436.071	351.788	154.384	138.387	-0.0753298	0.0753298	-0.757057	0.757057	1.74397	-1.74397	0.890759	-0.890759	0.288931	1
248	OG0002916	884.85	555.747	1552.86	1435.13	2680.72	2662.17	1554.01	1707.67	1060.74	835.092	0.315595	-0.315595	0.0278185	-0.0278185	-0.37734	0.37734	0.953376	-0.953376	0.28964	1
973	OG0004593	554.759	531.207	768.51	762.73	376.664	373.365	431.054	367.136	629.444	652.497	0.0941122	-0.0941122	0.109667	-0.109667	1.99643	-1.99643	-0.448331	0.448331	0.291335	1
667	OG0003908	81.5526	61.028	210.521	230.505	70.2662	85.1382	494.018	846.195	68.5091	52.1483	-0.278214	0.278214	-0.587574	0.587574	-1.6134	1.6134	0.83254	-0.83254	0.291444	1
440	OG0003311	387.988	459.757	1753.14	1627.45	379.792	350.011	364.774	536.395	121.58	138.755	0.349805	-0.349805	0.383932	-0.383932	-1.79179	1.79179	-0.620727	0.620727	0.291458	1
1301	OG0005347	436.714	460.623	43.9232	139.376	128.406	140.745	306.306	273.676	80.2489	71.3106	-2.08528	2.08528	-0.183587	0.183587	0.225285	-0.225285	0.236162	-0.236162	0.291931	1
231	OG0002873	166.569	164.183	125.982	155.325	278.186	219.472	99.2297	46.4445	77.0309	83.1057	-0.557398	0.557398	0.630455	-0.630455	1.9363	-1.9363	-0.202712	0.202712	0.29275	1
1089	OG0004860	1192.1	1336.71	547.601	478.623	1263.02	1365.25	631.974	1009.79	1166.44	1178.28	0.571325	-0.571325	-0.330606	0.330606	-1.95606	1.95606	-0.0429088	0.0429088	0.292937	1
1344	OG0005456	543.895	535.051	134.887	284.788	312.402	346.171	483.224	422.93	391.916	370.014	-2.05816	2.05816	-0.295457	0.295457	0.383406	-0.383406	0.165635	-0.165635	0.293318	1
629	OG0003804	127.222	98.5925	142.679	161.084	43.1036	50.4863	102.497	93.8626	141.843	140.966	-0.769352	0.769352	-1.00162	1.00162	0.558332	-0.558332	0.0393509	-0.0393509	0.294316	1
1183	OG0005086	288.158	284.98	509.996	476.128	532.088	507.734	364.526	401.719	469.432	405.211	0.747257	-0.747257	0.50959	-0.50959	-1.05606	1.05606	1.59753	-1.59753	0.294444	1
1143	OG0004997	1208.41	1137.34	206.335	742.313	180.583	132.285	1071.62	775.921	342.867	695.985	-1.72077	1.72077	0.470159	-0.470159	0.487459	-0.487459	-1.03526	1.03526	0.294775	1
366	OG0003164	806.651	966.651	320.671	318.716	801.615	1508.71	561.756	519.604	364.095	362.094	0.0201676	-0.0201676	-2.01956	2.01956	0.257218	-0.257218	0.0181881	-0.0181881	0.295945	1
726	OG0004048	132.933	144.64	244.443	234.785	114.294	104.113	77.7239	138.707	164.197	173.766	0.147025	-0.147025	0.340051	-0.340051	-2.05558	2.05558	-0.206571	0.206571	0.296581	1
533	OG0003577	133.135	115.758	88.371	112.824	133.907	121.346	318.284	232.023	164.197	130.832	-1.0576	1.0576	0.428234	-0.428234	1.36402	-1.36402	0.984106	-0.984106	0.296625	1
118	OG0002325	15748.2	12517.7	22889.7	19801.4	25085	20593.8	1954.25	1774.12	15714	18679.2	0.790026	-0.790026	1.07377	-1.07377	0.527629	-0.527629	-0.941548	0.941548	0.296851	1
147	OG0002497	1129.38	1339.85	554.298	525.336	589.283	528.961	132.275	316.468	846.567	882.542	0.134198	-0.134198	0.269861	-0.269861	-2.05341	2.05341	-0.104082	0.104082	0.297797	1
220	OG0002841	359.443	334.665	165.226	185.054	706.462	640.438	674.627	620.708	203.115	184.085	-1.14337	1.14337	0.990142	-0.990142	0.840791	-0.840791	0.992705	-0.992705	0.298789	1
1013	OG0004678	415.92	482.562	741.04	778.266	914.491	924.726	495.627	833.596	587.797	518.167	-0.190113	0.190113	-0.0431784	0.0431784	-1.97285	1.97285	0.48851	-0.48851	0.299414	1
468	OG0003399	159.231	139.86	127.303	189.967	111.099	98.4833	2261.73	229.041	128.495	121.802	-0.496003	0.496003	0.15116	-0.15116	2.04943	-2.04943	0.0671472	-0.0671472	0.301692	1
883	OG0004400	78.4944	62.1095	76.237	110.783	83.296	85.0582	913.194	871.524	79.6041	77.2072	-1.77765	1.77765	-0.100736	0.100736	0.224695	-0.224695	0.147098	-0.147098	0.302313	1
8	OG0001099	79.9215	78.1825	142.782	110.981	195.614	228.408	422.768	328.934	62.7196	64.1259	1.37258	-1.37258	-0.847082	0.847082	1.36719	-1.36719	-0.121425	0.121425	0.302546	1
1187	OG0005096	406.544	347.914	910.693	803.566	226.144	265.132	370.928	334.9	307.971	260.556	0.825253	-0.825253	-1.04804	1.04804	0.674086	-0.674086	1.10138	-1.10138	0.302556	1
694	OG0003977	339.662	276.464	123.971	131.193	72.1814	78.5399	160.633	131.695	400.117	332.421	-0.338616	0.338616	-0.504696	0.504696	1.18428	-1.18428	1.10557	-1.10557	0.302777	1
704	OG0003997	1214.93	901.92	279.277	425.294	914.571	696.849	642.816	465.253	1207.59	777.43	-1.11411	1.11411	0.726345	-0.726345	0.861465	-0.861465	1.16498	-1.16498	0.304554	1
19	OG0001319	1314.02	1449.42	1100.65	1008.66	170.883	138.953	955.559	1127.37	3428.35	3023.87	0.577566	-0.577566	1.36482	-1.36482	-1.09239	1.09239	0.830232	-0.830232	0.305352	1
993	OG0004638	229.98	170.699	385.729	426.053	291.595	294.684	295.465	258.999	259.239	215.596	-0.546635	0.546635	-0.0579863	0.0579863	0.723739	-0.723739	1.01148	-1.01148	0.305675	1
278	OG0002971	2564.83	4142.59	288.279	153.891	1433.2	2277.67	911.436	2411.75	3934.77	5074.05	0.995663	-0.995663	-0.745503	0.745503	-1.479	1.479	-0.414288	0.414288	0.305721	1
1117	OG0004940	241.19	337.488	527.334	521.176	38.1747	48.9506	448.522	392.337	687.18	816.315	0.0531884	-0.0531884	-1.12012	1.12012	0.605139	-0.605139	-0.777848	0.777848	0.30637	1
465	OG0003390	359.445	310.124	153.742	105.87	177.727	109.835	234.345	295.692	386.288	415.539	1.17997	-1.17997	1.51079	-1.51079	-0.740632	0.740632	-0.233437	0.233437	0.3066	1
1526	OG0006604	163.513	150.286	92.2533	89.9118	395.396	384.666	382.206	475.706	116.917	119.223	0.2296	-0.2296	0.245698	-0.245698	-1.94671	1.94671	-0.174366	0.174366	0.306697	1
332	OG0003087	875.671	901.054	726.336	795.376	1248.42	1129.81	1699.5	1510.03	1055.94	1032.28	-1.05242	1.05242	1.15687	-1.15687	1.36936	-1.36936	0.262842	-0.262842	0.307344	1
1036	OG0004739	170.243	183.075	172.479	190.752	124.079	108.295	169.957	154.045	162.753	157.882	-1.01264	1.01264	1.36727	-1.36727	0.988527	-0.988527	0.305745	-0.305745	0.307872	1
449	OG0003340	265.046	229.118	139.843	153.573	217.613	193.072	333.149	289.56	227.238	226.097	-0.785899	0.785899	1.00363	-1.00363	1.17566	-1.17566	0.0422671	-0.0422671	0.308109	1
178	OG0002758	575.15	534.245	408.767	383.435	575.657	777.077	664.167	828.164	820.18	722.887	0.336625	-0.336625	-1.5675	1.5675	-1.15688	1.15688	0.663766	-0.663766	0.308754	1
613	OG0003762	256.891	231.077	332.074	231.242	623.448	586.646	449.847	508.849	335.952	328.73	1.90646	-1.90646	0.323912	-0.323912	-0.655485	0.655485	0.115726	-0.115726	0.308755	1
769	OG0004142	623.474	570.748	64.056	115.738	482.396	377.285	283.203	307.454	111.285	125.119	-1.88507	1.88507	0.801826	-0.801826	-0.269255	0.269255	-0.383749	0.383749	0.309042	1
830	OG0004277	250.161	178.517	172.76	129.833	49.0891	68.5644	119.377	75.8332	166.77	146.863	0.83709	-0.83709	-0.976755	0.976755	1.31622	-1.31622	0.374529	-0.374529	0.30927	1
381	OG0003198	1616.98	1639.01	2865.96	2486.33	2857.29	3789.29	1581.27	1483.64	845.427	1111.15	0.715703	-0.715703	-1.41489	1.41489	0.321427	-0.321427	-1.37036	1.37036	0.310145	1
728	OG0004052	171.462	176.126	220.625	225.183	321.846	320.773	118.45	202.199	151.331	136.728	-0.0813671	0.0813671	0.0132822	-0.0132822	-2.07824	2.07824	0.403376	-0.403376	0.311321	1
696	OG0003979	209.796	220.436	187.183	260.208	33.6879	57.5285	340.249	258.328	192.985	189.061	-1.02371	1.02371	-1.63922	1.63922	0.85835	-0.85835	0.0644223	-0.0644223	0.311423	1
605	OG0003746	292.774	220.866	346.263	209.316	198.662	238.952	81.4294	76.8053	237.691	221.124	1.73344	-1.73344	-0.647449	0.647449	0.20551	-0.20551	0.253935	-0.253935	0.311457	1
1174	OG0005061	567.716	471.391	1227.15	1196.38	349.52	361.103	441.462	366.232	606.77	620.438	0.201766	-0.201766	-0.259021	0.259021	1.48014	-1.48014	-0.176983	0.176983	0.315509	1
947	OG0004538	821.438	1023.32	1282.28	1289.19	397.748	388.241	938.281	1118.11	985.663	974.052	-0.0404733	0.0404733	0.18231	-0.18231	-1.31794	1.31794	0.0892936	-0.0892936	0.316543	1
1264	OG0005265	70.1352	72.536	669.738	707.428	137.2	123.544	83.6541	77.4413	119.811	121.249	-0.797588	0.797588	1.52637	-1.52637	1.12395	-1.12395	-0.173968	0.173968	0.317343	1
27	OG0001430	190.223	218.692	275.892	373.334	27.5	75.5839	418.034	312.414	378.251	339.206	-0.61408	0.61408	-1.90846	1.90846	0.591602	-0.591602	0.222661	-0.222661	0.317845	1
857	OG0004332	503.179	511.01	392.591	391.161	156.017	54.2671	664.119	848.256	2855.67	2620.31	0.00772781	-0.00772781	2.04935	-2.04935	-0.515667	0.515667	0.182035	-0.182035	0.317918	1
517	OG0003533	260.171	268.778	168.981	136.2	164.763	166.23	55.4119	81.1462	239.298	300.54	0.928653	-0.928653	-0.0383366	0.0383366	-1.62923	1.62923	-0.980793	0.980793	0.317963	1
965	OG0004578	109.077	113.584	104.216	119.008	230.852	201.807	363.874	275.754	152.296	153.312	-0.835663	0.835663	0.846533	-0.846533	1.73728	-1.73728	-0.0419373	0.0419373	0.319444	1
598	OG0003734	261.782	208.272	269.839	293.046	200.38	201.192	596.372	545.542	105.178	89.5551	-0.575697	0.575697	-0.0282307	0.0282307	0.621544	-0.621544	1.12019	-1.12019	0.319601	1
177	OG0002756	589.217	491.028	616.576	679.853	69.8101	48.4315	242.583	232.193	494.518	495.868	-0.494638	0.494638	1.83232	-1.83232	0.221773	-0.221773	-0.0138106	0.0138106	0.320318	1
1390	OG0005561	189.522	122.471	247.629	258.693	279.026	276.736	155.757	156.793	219.763	173.062	-0.187955	0.187955	0.0354385	-0.0354385	-0.0285318	0.0285318	1.02255	-1.02255	0.320488	1
780	OG0004159	118.455	117.708	324.237	337.277	193.077	210.824	147.14	125.159	165.967	139.861	-0.329215	0.329215	-0.73385	0.73385	1.34821	-1.34821	1.4257	-1.4257	0.321709	1
544	OG0003603	359.237	578.987	242.254	165.916	49.0262	66.1507	152.207	446.296	566.889	553.178	0.667242	-0.667242	-0.530442	0.530442	-1.75307	1.75307	0.0436728	-0.0436728	0.321847	1
750	OG0004101	640.95	823.29	1266.96	1344.36	2816.52	2323.85	1391.58	1756.29	686.585	832.986	-0.286157	0.286157	0.92533	-0.92533	-1.11858	1.11858	-0.930159	0.930159	0.321864	1
1384	OG0005533	345.987	292.75	516.152	513.275	208.937	258.174	635.667	484.253	350.908	258.346	0.024326	-0.024326	-0.917249	0.917249	1.17651	-1.17651	1.32206	-1.32206	0.322563	1
832	OG0004279	117.234	111.41	181.318	171.101	155.687	178.648	256.786	227.668	80.2489	68.3641	0.482952	-0.482952	-1.14413	1.14413	1.00131	-1.00131	1.33231	-1.33231	0.323087	1
230	OG0002869	138.639	161.145	157.512	167.717	177.795	180.125	558.64	562.534	301.857	293.907	-0.804072	0.804072	-0.166793	0.166793	-0.0890143	0.0890143	0.341949	-0.341949	0.324133	1
1577	OG0007129	352.715	307.084	100.942	83.6297	227.598	234.756	775.941	749.083	352.195	364.489	1.65669	-1.65669	-0.273427	0.273427	0.311062	-0.311062	-0.302988	0.302988	0.324689	1
445	OG0003331	1150.5	1021.8	406.418	485.366	600.947	546.976	79.0628	84.5109	1108.69	1131.78	-1.54507	1.54507	0.820558	-0.820558	-0.581301	0.581301	-0.179932	0.179932	0.324754	1
1210	OG0005143	287.267	249.748	107.23	137.527	577.135	522.35	426.792	247.27	170.63	154.418	-0.847034	0.847034	0.340959	-0.340959	1.82243	-1.82243	0.341277	-0.341277	0.324806	1
900	OG0004441	131.506	142.029	146.165	125.939	54.5253	72.593	201.062	198.211	89.2564	105.771	0.84979	-0.84979	-1.62497	1.62497	0.0816424	-0.0816424	-0.968093	0.968093	0.325697	1
308	OG0003039	645.695	695.827	704.501	669.223	62.6285	70.8065	205.467	216.273	532.266	527.773	0.676392	-0.676392	-1.61425	1.61425	-0.674872	0.674872	0.111648	-0.111648	0.32695	1
983	OG0004612	259.949	244.965	121.3	153.203	90.8429	105.406	340.107	284.4	154.385	164.737	-1.45014	1.45014	-0.925912	0.925912	1.11303	-1.11303	-0.404763	0.404763	0.327179	1
387	OG0003209	216.926	176.345	231.403	165.618	164.011	205.175	265.59	240.233	150.849	131.386	1.46199	-1.46199	-0.983786	0.983786	0.442297	-0.442297	0.608438	-0.608438	0.327495	1
1423	OG0005633	1176.19	1058.94	1414.39	1569.25	99.4627	137.917	464.098	425.276	1572.43	1485.08	-0.593537	0.593537	-1.85254	1.85254	0.499185	-0.499185	0.326686	-0.326686	0.328626	1
489	OG0003441	504.401	378.529	562.99	677.276	155.873	141.585	279.415	229.643	293.012	252.448	-0.909309	0.909309	0.474004	-0.474004	0.964815	-0.964815	0.73385	-0.73385	0.329013	1
272	OG0002963	374.938	444.55	245.036	197.093	1059.91	1215.19	618.718	1014.73	954.303	985.659	0.800044	-0.800044	-0.503564	0.503564	-1.78867	1.78867	-0.119249	0.119249	0.329385	1
459	OG0003367	253.83	188.07	360.524	242.248	104.415	91.365	635.571	767.144	166.927	162.97	1.52981	-1.52981	0.519677	-0.519677	-0.731293	0.731293	0.0935254	-0.0935254	0.329528	1
200	OG0002801	343.343	376.14	280.627	286.735	264.3	279.168	224.782	221.736	492.904	486.284	-0.414602	0.414602	-1.05347	1.05347	0.26268	-0.26268	0.260328	-0.260328	0.330467	1
925	OG0004487	81.1448	80.7886	116.231	110.263	42.5777	59.0128	496.243	489.954	116.753	117.009	0.340689	-0.340689	-2.09192	2.09192	0.0824598	-0.0824598	-0.0141657	0.0141657	0.33053	1
1122	OG0004952	366.071	354.647	247.607	287.342	1285.33	887.191	1435.63	1180.12	1098.88	1166.99	-0.706094	0.706094	1.74209	-1.74209	0.928544	-0.928544	-0.285729	0.285729	0.330536	1
955	OG0004555	126.61	137.688	186.599	193.063	330.456	343.217	69.6663	62.5632	416.638	385.898	-0.439288	0.439288	-0.488765	0.488765	1.38615	-1.38615	0.988417	-0.988417	0.331035	1
1567	OG0007084	302.762	317.508	285.739	312.048	436.917	456.015	107.515	155.577	443.54	374.619	-0.447992	0.447992	-0.217721	0.217721	-1.85958	1.85958	0.857502	-0.857502	0.331892	1
1383	OG0005532	157.396	65.5865	1497.18	1500.26	27.3045	52.5669	37.8266	59.9162	73.8162	49.3843	-0.00363792	0.00363792	-1.1183	1.1183	-0.799058	0.799058	0.701163	-0.701163	0.33242	1
1114	OG0004934	364.13	356.384	609.561	644.166	537.867	469.88	542.781	588.669	329.68	264.611	-0.424088	0.424088	1.03657	-1.03657	-0.62314	0.62314	1.68229	-1.68229	0.332532	1
1461	OG0006038	111.315	126.308	140.518	117.869	122.155	121.729	506.897	463.075	89.8997	98.9529	1.4697	-1.4697	0.0292981	-0.0292981	0.757525	-0.757525	-0.803779	0.803779	0.332742	1
1027	OG0004711	155.967	137.254	183.492	177.341	113.36	178.262	192.354	183.099	220.802	219.283	0.154863	-0.154863	-2.02204	2.02204	0.223954	-0.223954	0.0313627	-0.0313627	0.332858	1
1331	OG0005415	166.775	182.645	265.672	271.572	180.445	140.834	141.08	157.867	187.678	165.843	-0.149277	0.149277	1.67599	-1.67599	-0.763321	0.763321	0.839609	-0.839609	0.332904	1
1387	OG0005546	225.489	163.964	443.742	460.442	67.0826	74.316	406.026	319.59	168.967	147.923	-0.181669	0.181669	-0.503158	0.503158	1.17165	-1.17165	0.653179	-0.653179	0.333212	1
1392	OG0005563	216.522	173.087	242.129	302.95	3.27664	61.0045	521.571	299.512	210.994	212.647	-0.248879	0.248879	-2.00307	2.00307	0.60322	-0.60322	-0.00870666	0.00870666	0.334983	1
168	OG0002648	153.931	186.769	215.259	229.781	163.183	151.314	289.971	233.967	91.8279	95.2675	-0.451147	0.451147	0.521765	-0.521765	1.4778	-1.4778	-0.25416	0.25416	0.336727	1
1443	OG0005811	106.222	154.628	151.528	173.087	124.089	128.814	419.786	381.847	119.651	127.699	-0.683464	0.683464	-0.192267	0.192267	0.48702	-0.48702	-0.334809	0.334809	0.337352	1
713	OG0004022	89.0982	98.8162	100.905	122.704	169.994	155.053	422.674	255.881	59.3424	57.494	-0.755338	0.755338	0.356148	-0.356148	1.90448	-1.90448	0.122575	-0.122575	0.338538	1
817	OG0004250	95.2126	102.072	294.45	154.251	439.365	364.854	629.181	876.922	172.238	156.998	1.79323	-1.79323	0.531732	-0.531732	-0.944039	0.944039	0.265657	-0.265657	0.339744	1
1051	OG0004783	847.333	660.855	315.901	340.486	508.921	429.042	343.517	295.86	630.736	665.767	-0.456984	0.456984	1.03906	-1.03906	0.90942	-0.90942	-0.329663	0.329663	0.340166	1
1566	OG0007056	123.758	121.183	123.646	125.06	95.5531	103.076	279.084	185.008	89.0956	88.818	-0.0583987	0.0583987	-0.388941	0.388941	2.08168	-2.08168	0.0160232	-0.0160232	0.34019	1
536	OG0003582	130.076	120.097	386.866	515.377	39.7758	73.9034	226.249	172.878	195.237	184.087	-0.835612	0.835612	-1.76121	1.76121	0.784469	-0.784469	0.172433	-0.172433	0.340991	1
367	OG0003165	160.453	134.648	278.475	275.952	127.17	124.035	131.138	74.8292	63.3645	73.1532	0.0325859	-0.0325859	0.0893984	-0.0893984	1.95827	-1.95827	-0.513608	0.513608	0.344256	1
854	OG0004326	479.731	429.352	496.507	596.327	473.919	515.533	510.493	450.374	373.262	390.281	-1.46077	1.46077	-0.672615	0.672615	1.00061	-1.00061	-0.356474	0.356474	0.344447	1
1220	OG0005165	411.433	438.906	93.359	55.367	598.778	648.476	345.884	315.53	343.189	382.913	2.00583	-2.00583	-0.312877	0.312877	0.36035	-0.36035	-0.429578	0.429578	0.34563	1
801	OG0004210	312.754	287.538	618.329	548.563	336.626	387.137	381.958	292.307	237.368	236.602	0.759429	-0.759429	-0.886478	0.886478	1.68888	-1.68888	0.0205185	-0.0205185	0.345808	1
599	OG0003735	770.682	978.626	464.652	415.296	721.356	708.36	971.514	1133.14	655.016	782.408	0.674576	-0.674576	0.109321	-0.109321	-0.923598	0.923598	-1.06587	1.06587	0.346796	1
873	OG0004373	617.759	613.301	1187.61	1204.98	738.705	710.484	288.883	363.046	951.567	928.351	-0.132375	0.132375	0.355025	-0.355025	-2.07398	2.07398	0.22515	-0.22515	0.348357	1
1192	OG0005106	122.329	101.854	157.103	142.125	153.939	132.656	302.281	352.257	168.056	152.023	0.675619	-0.675619	1.00235	-1.00235	-1.03058	1.03058	0.676135	-0.676135	0.348573	1
204	OG0002811	148.02	121.615	121.765	186.485	242.609	246.126	219.433	243.786	147.47	123.092	-1.75227	1.75227	-0.0600648	0.0600648	-0.438768	0.438768	0.751961	-0.751961	0.349132	1
867	OG0004359	412.656	442.383	617.654	596.671	1412.35	1122.41	510.399	596.679	657.589	579.16	0.233299	-0.233299	1.54433	-1.54433	-1.05223	1.05223	0.856202	-0.856202	0.350018	1
356	OG0003144	701.148	699.301	636.085	496.573	790.021	909.16	1481.49	2336.18	896.569	958.205	0.978417	-0.978417	-0.556966	0.556966	-1.7784	1.7784	-0.263971	0.263971	0.350298	1
777	OG0004155	234.054	232.159	1980.67	1757.45	90.2472	133.998	144.49	146.471	302.986	311.602	0.61891	-0.61891	-2.02215	2.02215	-0.0705758	0.0705758	-0.14531	0.14531	0.35078	1
146	OG0002495	331.923	293.184	338.002	351.512	273.522	270.545	334.332	297.904	276.996	275.268	-0.477294	0.477294	0.133294	-0.133294	1.4035	-1.4035	0.0762122	-0.0762122	0.351724	1
1099	OG0004898	223.454	228.469	385.023	391.907	367.339	350.981	242.108	254.307	192.503	167.133	-0.236799	0.236799	0.60862	-0.60862	-0.656758	0.656758	1.88527	-1.88527	0.351827	1
512	OG0003519	273.809	239.979	114.291	134.425	419.109	415.386	236.048	162.979	173.683	156.994	-0.792188	0.792188	0.0436685	-0.0436685	1.79203	-1.79203	0.493914	-0.493914	0.352644	1
1258	OG0005243	337.832	273.856	1507.51	1410.37	630.55	740.994	1150.75	696.035	784.798	789.596	0.250981	-0.250981	-0.607111	0.607111	1.85637	-1.85637	-0.0229778	0.0229778	0.359916	1
962	OG0004573	348.295	381.203	234.995	199.87	30.5021	57.7561	153.153	141.032	445.142	500.112	0.518992	-0.518992	-1.98417	1.98417	0.264754	-0.264754	-0.373661	0.373661	0.360667	1
557	OG0003631	306.842	271.035	254.519	171.358	57.1061	65.8101	305.311	280.914	242.032	245.63	1.8757	-1.8757	-0.680195	0.680195	0.399757	-0.399757	-0.0708706	0.0708706	0.360928	1
1176	OG0005069	271.57	272.119	398.023	432.971	160.413	125.77	466.94	298.743	172.075	208.409	-0.32841	0.32841	0.945288	-0.945288	1.71536	-1.71536	-0.745693	0.745693	0.361461	1
1460	OG0006031	55.048	65.1521	331.174	317.71	148.736	125.848	40.4778	70.304	372.458	410.92	0.147258	-0.147258	0.591568	-0.591568	-1.91077	1.91077	-0.348446	0.348446	0.362188	1
1492	OG0006353	207.755	191.113	122.774	74.0184	13.4277	272.077	481.236	580.291	208.422	190.165	0.555645	-0.555645	-2.03178	2.03178	-0.20928	0.20928	0.102731	-0.102731	0.362221	1
1364	OG0005492	289.919	287.104	201.426	207.44	122.525	134.831	315.631	286.544	224.342	247.657	-0.365248	0.365248	-1.18725	1.18725	1.19927	-1.19927	-1.22642	1.22642	0.362876	1
361	OG0003152	414.697	386.782	369.088	307.187	222.123	239.574	275.42	208.562	290.921	326.714	1.06146	-1.06146	-0.438339	0.438339	1.60199	-1.60199	-0.672046	0.672046	0.362949	1
1283	OG0005304	309.084	266.906	166.441	171.617	210.135	176.095	83.1338	88.9021	615.131	571.236	-0.257917	0.257917	1.4847	-1.4847	-0.564827	0.564827	0.623281	-0.623281	0.363674	1
262	OG0002949	1043.26	1241.79	366.062	300.493	1225.94	1543.98	771.35	933.036	1407.71	1472.51	1.04449	-1.04449	-1.21915	1.21915	-1.00728	1.00728	-0.238897	0.238897	0.36431	1
669	OG0003914	1005.55	986.184	538.765	509.293	291.423	360.736	941.608	1214.51	1085.53	944.014	0.328061	-0.328061	-1.23992	1.23992	-1.47661	1.47661	0.813474	-0.813474	0.36451	1
761	OG0004119	70.1373	82.3088	155.282	167.668	134.277	137.474	317.053	229.175	77.515	75.5524	-0.441042	0.441042	-0.135302	0.135302	1.85	-1.85	0.147438	-0.147438	0.364793	1
187	OG0002775	545.322	529.912	241.922	240.973	379.559	375.359	688.264	1063.44	483.745	442.616	0.0190243	-0.0190243	0.0538253	-0.0538253	-2.07196	2.07196	0.429514	-0.429514	0.365917	1
765	OG0004130	1163.96	1059.15	200.867	213.119	1230.37	1061.01	178.954	173.274	870.132	870.551	-0.668443	0.668443	1.66938	-1.66938	0.364185	-0.364185	-0.0054421	0.0054421	0.366219	1
407	OG0003253	1075.07	944.271	1300.2	1451.62	1156.69	870.849	326.613	506.102	1542.1	1784.28	-0.415679	0.415679	1.06495	-1.06495	-1.62825	1.62825	-0.549985	0.549985	0.366455	1
1489	OG0006341	134.564	162.882	105.237	132.841	155.745	125.587	888.334	592.892	330.968	332.791	-0.90545	0.90545	0.83713	-0.83713	1.55761	-1.55761	-0.0214478	0.0214478	0.367798	1
859	OG0004335	87.2613	100.115	133.565	135.648	230.156	203.387	175.829	157.698	57.0909	61.9146	-0.142967	0.142967	1.14106	-1.14106	1.00462	-1.00462	-0.749084	0.749084	0.369017	1
1182	OG0005083	404.297	387.221	105.359	147.372	90.9081	74.8207	46.8212	59.6146	402.534	385.122	-1.53965	1.53965	0.899046	-0.899046	-1.11326	1.11326	0.204749	-0.204749	0.371503	1
1556	OG0006907	451.294	393.252	664.048	481.647	625.994	645.057	62.1606	136.889	541.463	625.942	0.803936	-0.803936	-0.0757345	0.0757345	-1.89578	1.89578	-0.365419	0.365419	0.372199	1
1538	OG0006696	496.861	390.91	143.166	171.582	197.124	249.105	1166.56	928.595	358.629	394.341	-0.847085	0.847085	-1.09302	1.09302	1.06572	-1.06572	-0.445015	0.445015	0.372349	1
990	OG0004630	366.375	342.7	210.03	197.034	258.829	290.896	803.21	614.64	318.583	317.128	0.444353	-0.444353	-0.811894	0.811894	1.85106	-1.85106	0.0318601	-0.0318601	0.372475	1
1560	OG0006967	152.505	124.128	325.452	338.825	436.679	411.124	384.325	304.64	75.7444	81.0768	-0.262972	0.262972	0.393762	-0.393762	1.51088	-1.51088	-0.444194	0.444194	0.375259	1
324	OG0003071	101.737	90.9979	84.2108	94.156	72.5445	88.2065	79.3932	56.0958	57.2517	39.8023	-0.424602	0.424602	-0.741949	0.741949	1.30944	-1.30944	1.36914	-1.36914	0.375756	1
285	OG0002990	124.979	117.274	174.047	155.915	109.362	122.683	91.1815	88.2319	110.322	98.0315	1.10757	-1.10757	-1.15704	1.15704	0.331375	-0.331375	1.189	-1.189	0.375808	1
960	OG0004562	312.958	370.281	120.96	182.163	986.78	626.31	161.624	348.966	236.726	236.602	-0.888535	0.888535	0.983396	-0.983396	-1.61466	1.61466	0.00115256	-0.00115256	0.376101	1
662	OG0003898	196.748	198.712	107.982	109.082	82.0137	70.0179	143.023	114.906	230.295	266.087	-0.0703406	0.0703406	1.09515	-1.09515	1.51305	-1.51305	-1.00081	1.00081	0.377538	1
196	OG0002793	1113.8	1113.66	1075.43	1030.34	72.968	135.427	553.29	587.733	1012.36	858.329	0.145122	-0.145122	-2.03119	2.03119	-0.204571	0.204571	0.558004	-0.558004	0.379286	1
1414	OG0005616	223.658	171.567	126.644	155.101	176.985	174.46	208.639	199.048	211.315	213.383	-1.27586	1.27586	0.0907665	-0.0907665	0.297143	-0.297143	-0.0614884	0.0614884	0.379467	1
1003	OG0004658	1874.08	1683.1	1695.81	1259.1	3175.6	3514.42	3657.91	5150.46	4895.76	6141.45	1.19578	-1.19578	-0.409776	0.409776	-1.37099	1.37099	-0.913171	0.913171	0.37997	1
944	OG0004527	269.119	305.998	84.6761	105.325	312.307	266.008	249.069	150.996	197.486	203.248	-0.801979	0.801979	0.590789	-0.590789	1.80904	-1.80904	-0.106095	0.106095	0.380061	1
1151	OG0005012	192.056	199.583	158.589	144.474	186.233	270.232	117.598	145.456	248.786	212.828	0.426417	-0.426417	-1.68478	1.68478	-0.969598	0.969598	0.713176	-0.713176	0.383511	1
412	OG0003260	1005.54	1792.99	221.127	231.683	1797.27	2825.08	1004.98	1172.28	1158.7	892.418	-0.12687	0.12687	-1.21019	1.21019	-0.41819	0.41819	0.706576	-0.706576	0.385043	1
25	OG0001356	617.559	562.043	398.535	423.688	161.71	118.567	646.472	1737.5	546.505	557.081	-0.133473	0.133473	0.671618	-0.671618	-1.9968	1.9968	-0.0418121	0.0418121	0.38771	1
271	OG0002962	420.2	527.951	213.866	366.825	1401.1	1245.49	387.497	357.607	414.11	440.036	-1.88057	1.88057	0.419755	-0.419755	0.286395	-0.286395	-0.216701	0.216701	0.388367	1
646	OG0003863	503.793	468.226	600.635	495.383	301.078	516.81	232.451	205.181	148.756	187.032	0.654054	-0.654054	-1.79646	1.79646	0.424395	-0.424395	-0.776344	0.776344	0.388642	1
1172	OG0005059	121.307	128.784	173.247	202.041	73.6662	84.2235	266.917	184.607	105.017	79.4203	-0.644655	0.644655	-0.561813	0.561813	1.53166	-1.53166	1.16607	-1.16607	0.389642	1
515	OG0003531	450.576	453.459	864.333	1184.46	71.6485	42.2723	36.6033	39.4413	207.938	540.83	-0.615533	0.615533	1.01584	-1.01584	-0.14702	0.14702	-1.75141	1.75141	0.390886	1
1439	OG0005778	521.731	615.036	524.948	501.979	438.059	442.611	116.604	117.358	634.115	631.12	0.556071	-0.556071	-0.128493	0.128493	-0.0801298	0.0801298	0.0588401	-0.0588401	0.39442	1
798	OG0004206	117.64	116.188	207.778	235.599	97.7685	108.894	284.386	177.87	116.755	102.823	-0.526173	0.526173	-0.451416	0.451416	1.93224	-1.93224	0.532071	-0.532071	0.39461	1
1026	OG0004706	197.561	144.855	259.038	79.684	77.5944	108.097	156.372	34.5823	36.8277	78.1304	1.20638	-1.20638	-0.374247	0.374247	1.45311	-1.45311	-0.818572	0.818572	0.394621	1
1463	OG0006073	115.805	128.567	422.619	492.589	264.595	271.64	220.521	248.778	93.7578	82	-1.24955	1.24955	-0.214704	0.214704	-0.984122	0.984122	1.09338	-1.09338	0.397016	1
809	OG0004237	327.843	309.036	229.82	157.363	71.851	83.4917	106.663	106.662	287.545	270.878	1.92793	-1.92793	-0.771995	0.771995	2.78534e-05	-2.78534e-05	0.307481	-0.307481	0.397484	1
903	OG0004444	225.085	209.355	184.988	233.471	295.086	252.416	84.5058	58.0732	129.942	126.225	-1.04432	1.04432	0.702475	-0.702475	1.67102	-1.67102	0.130801	-0.130801	0.397884	1
175	OG0002666	841.009	917.342	2321.68	2043.99	1617.87	1475.17	714.23	1081.82	855.076	970.917	0.580815	-0.580815	0.421259	-0.421259	-1.86883	1.86883	-0.579274	0.579274	0.399799	1
1111	OG0004926	112.952	166.138	192.874	186.654	115.311	124.29	100.602	100.295	152.901	155.831	0.178155	-0.178155	-0.407402	0.407402	0.0165955	-0.0165955	-0.103188	0.103188	0.401558	1
892	OG0004420	200.619	216.52	344.461	424.784	120.544	80.0747	242.866	208.835	239.943	243.42	-0.913652	0.913652	1.76507	-1.76507	0.659223	-0.659223	-0.0629524	0.0629524	0.401865	1
1168	OG0005048	498.698	732.095	354.877	290.265	78.4555	75.8097	129.007	185.078	744.144	900.289	0.719577	-0.719577	0.123228	-0.123228	-1.28266	1.28266	-0.682234	0.682234	0.402533	1
224	OG0002850	634.479	897.147	193.536	134.885	456.069	606.202	747.05	1174.5	522.662	560.915	1.04267	-1.04267	-0.825173	0.825173	-1.2988	1.2988	-0.206118	0.206118	0.403781	1
1199	OG0005123	160.659	192.631	160.538	150.191	150.274	178.202	210.437	178.139	124.957	109.827	0.425264	-0.425264	-1.08586	1.08586	1.06154	-1.06154	0.823018	-0.823018	0.404021	1
1512	OG0006522	422.035	496.025	436.68	328.217	98.2596	87.214	98.8505	121.239	216.302	204.355	1.48009	-1.48009	0.621612	-0.621612	-1.06178	1.06178	0.296446	-0.296446	0.405366	1
22	OG0001331	11032.3	7480.9	25279	27071.4	3439.73	3818.58	801.223	1006.31	8824.64	7347.98	-0.291901	0.291901	-0.445011	0.445011	-0.967357	0.967357	0.77847	-0.77847	0.406048	1
562	OG0003642	976.794	1021.8	914.64	802.512	1331.14	1171.49	1160.6	1331.79	1180.9	1137.13	1.17429	-1.17429	1.1472	-1.1472	-1.23518	1.23518	0.339548	-0.339548	0.406447	1
607	OG0003751	199.398	145.724	244.096	290.957	153.523	147.356	183.169	143.657	224.184	200.301	-0.830375	0.830375	0.194318	-0.194318	1.14623	-1.14623	0.533443	-0.533443	0.406757	1
1169	OG0005049	256.889	322.288	108.997	107.165	193.852	151.809	283.865	471.218	316.527	370.161	0.0582666	-0.0582666	0.835878	-0.835878	-1.70517	1.70517	-0.536767	0.536767	0.407967	1
1112	OG0004928	172.688	158.962	171.56	183.406	118.813	136.032	214.178	167.987	162.426	133.409	-0.398093	0.398093	-0.806027	0.806027	1.44187	-1.44187	1.17009	-1.17009	0.408167	1
1506	OG0006461	276.053	270.816	377.134	411.084	536.694	550.456	648.025	525.973	333.216	312.518	-0.773804	0.773804	-0.227426	0.227426	1.86769	-1.86769	0.57586	-0.57586	0.408339	1
1372	OG0005514	843.867	1000.96	1818.57	1659.94	1004.94	965.585	1616.08	1984.43	1228.18	1349.41	0.646268	-0.646268	0.28305	-0.28305	-1.44978	1.44978	-0.666528	0.666528	0.40967	1
1160	OG0005032	770.47	1182.3	441.64	304.488	1757.51	1947.07	399.236	729.513	3111.21	3684.84	0.935813	-0.935813	-0.260504	0.260504	-1.48964	1.48964	-0.429706	0.429706	0.409951	1
148	OG0002509	862.826	830.255	973.54	764.167	1256.9	1407.88	329.786	584.39	1110.3	1099.72	0.826278	-0.826278	-0.38853	0.38853	-1.90993	1.90993	0.0328187	-0.0328187	0.410045	1
1576	OG0007128	59.3315	61.6773	133.606	125.767	77.4385	74.8646	136.442	160.982	67.8674	49.2019	0.348686	-0.348686	0.194991	-0.194991	-0.95197	0.95197	1.8396	-1.8396	0.411022	1
280	OG0002978	730.815	729.81	599.114	703.543	1500.09	1296.73	801.839	405.472	251.361	295.386	-0.479119	0.479119	0.434565	-0.434565	1.96214	-1.96214	-0.481246	0.481246	0.412057	1
1028	OG0004712	657.724	768.135	1679.38	1379.98	162.622	149.637	326.284	357.384	920.373	948.621	1.48284	-1.48284	0.630056	-0.630056	-0.689291	0.689291	-0.229006	0.229006	0.412904	1
123	OG0002366	481.364	554.662	335.038	274.667	229.742	228.744	37.6557	56.274	554.827	622.83	0.876416	-0.876416	0.0192546	-0.0192546	-1.75446	1.75446	-0.511108	0.511108	0.412938	1
389	OG0003211	113.766	99.8999	69.7498	98.2673	314.832	259.044	205.027	129.67	83.6262	75.3663	-1.1629	1.1629	0.666056	-0.666056	1.54261	-1.54261	0.355942	-0.355942	0.413024	1
1167	OG0005045	233.039	272.772	285.533	117.574	250.868	256.439	182.598	218.016	229.974	243.975	2.03532	-2.03532	-0.0536463	0.0536463	-0.431869	0.431869	-0.144309	0.144309	0.414578	1
460	OG0003369	651.605	805.063	602.422	397.018	220.258	247.747	198.667	395.25	913.064	1088.66	1.04505	-1.04505	-0.298665	0.298665	-1.68308	1.68308	-0.446054	0.446054	0.414581	1
732	OG0004058	170.851	131.39	308.611	232.225	0	50.1496	176.587	139.37	206.978	184.27	0.291803	-0.291803	-2.06603	2.06603	0.243361	-0.243361	0.119913	-0.119913	0.416863	1
1295	OG0005334	135.581	137.471	163.618	145.999	224.529	226.368	526.116	480.064	199.415	217.07	1.42317	-1.42317	-0.102019	0.102019	1.14465	-1.14465	-1.06018	1.06018	0.421111	1
1271	OG0005277	494.411	710.375	587.889	694.977	589.139	191.334	11.74	182.194	72.692	119.591	-0.166516	0.166516	1.01673	-1.01673	-1.75327	1.75327	-0.486539	0.486539	0.421308	1
1126	OG0004964	110.3	98.8162	165.595	157.174	47.9767	52.6805	143.401	150.36	121.74	89.3727	0.319793	-0.319793	-0.572832	0.572832	-0.29039	0.29039	1.8794	-1.8794	0.421652	1
931	OG0004497	661.394	688.004	234.055	277.737	1648.34	1500.23	79.8662	101.603	787.051	711.652	-1.1067	1.1067	0.609955	-0.609955	-1.55314	1.55314	0.652332	-0.652332	0.421988	1
88	OG0002041	115.395	157.017	131.979	156.535	249.152	216.568	204.567	180.473	273.26	251.919	-0.89113	0.89113	0.732537	-0.732537	0.655173	-0.655173	0.425448	-0.425448	0.423357	1
1385	OG0005536	83.5914	77.3138	85.8724	116.237	114.296	122.748	177.577	199.297	53.5545	42.7506	-1.56878	1.56878	-0.372293	0.372293	-0.601789	0.601789	1.17141	-1.17141	0.42562	1
1362	OG0005490	481.772	277.544	464.718	476.008	456.356	475.956	474.277	420.015	418.933	405.209	-0.0918133	0.0918133	-0.160838	0.160838	0.464196	-0.464196	0.127398	-0.127398	0.42681	1
1299	OG0005343	191.649	173.739	186.531	225.995	123.153	146.891	299.44	251.525	158.888	160.867	-1.23772	1.23772	-1.13729	1.13729	1.12518	-1.12518	-0.0800924	0.0800924	0.426954	1
9	OG0001182	320.233	275.12	459.961	550.484	463.572	464.444	425.09	336.172	347.049	292.805	-1.0217	1.0217	-0.0107103	0.0107103	1.33209	-1.33209	0.966829	-0.966829	0.429374	1
499	OG0003467	374.53	456.718	273.836	305.987	66.068	75.1082	260.432	247.001	408.962	383.834	-0.861163	0.861163	-0.994518	0.994518	0.411079	-0.411079	0.492267	-0.492267	0.43165	1
1225	OG0005172	172.28	140.514	111.577	153.212	248.559	251.484	619.144	294.385	122.384	107.798	-0.819993	0.819993	-0.0305003	0.0305003	1.85391	-1.85391	0.330455	-0.330455	0.432657	1
568	OG0003654	375.346	258	189.869	250.12	416.175	275.602	167.545	157.396	133.964	116.825	-0.918516	0.918516	1.36302	-1.36302	0.209493	-0.209493	0.4584	-0.4584	0.434384	1
656	OG0003883	279.929	354.425	193.736	202.317	181.984	193.787	188.281	185.31	159.533	154.05	-0.367786	0.367786	-0.533208	0.533208	0.134971	-0.134971	0.296838	-0.296838	0.434444	1
142	OG0002477	107.443	185.684	118.564	103.511	104.713	218.149	593.248	71.4433	551.609	492.183	0.158908	-0.158908	-0.823669	0.823669	1.84037	-1.84037	0.13347	-0.13347	0.435298	1
935	OG0004510	243.025	248.23	259.897	331.54	535.263	491.939	355.778	460.261	197.004	168.054	-1.29709	1.29709	0.451621	-0.451621	-1.37101	1.37101	0.849161	-0.849161	0.43557	1
626	OG0003795	1790.69	1956.52	2234.45	1980.42	3461.23	3623.49	2558.53	3006.65	3281.19	3449.9	1.11163	-1.11163	-0.422435	0.422435	-1.48522	1.48522	-0.462307	0.462307	0.437697	1
74	OG0001976	545.787	504.49	383.874	434.376	1638.08	1543.97	1722.78	1550.04	713.395	657.657	-1.26759	1.26759	0.607451	-0.607451	1.08397	-1.08397	0.834939	-0.834939	0.438413	1
878	OG0004385	519.894	584.199	754.265	639.652	206.703	211.756	178.765	239.629	698.761	748.504	0.965405	-0.965405	-0.141787	0.141787	-1.70804	1.70804	-0.403551	0.403551	0.438648	1
110	OG0002256	377.588	300.119	587.776	715.475	218.776	220.052	648.875	465.52	260.365	228.31	-0.894056	0.894056	-0.026537	0.026537	1.50127	-1.50127	0.598524	-0.598524	0.440927	1
1578	OG0007150	399.198	330.323	334.363	389.178	561.72	356.67	219.243	234.972	368.92	339.609	-0.618971	0.618971	1.82417	-1.82417	-0.282934	0.282934	0.337989	-0.337989	0.441406	1
166	OG0002633	420.404	433.696	123.593	61.4154	58.3302	54.2537	567.447	772.975	1059.47	1025.65	1.91723	-1.91723	0.206557	-0.206557	-0.87471	0.87471	0.0925524	-0.0925524	0.444999	1
1064	OG0004808	918.731	829.139	741.106	644.127	489.662	430.543	292.623	321.203	1009.95	1051.63	1.24485	-1.24485	1.14237	-1.14237	-0.827889	0.827889	-0.359488	0.359488	0.450044	1
194	OG0002789	313.568	302.089	130.326	147.417	130.046	136.888	393.084	293.816	125.761	114.616	-0.782524	0.782524	-0.325966	0.325966	1.8378	-1.8378	0.589623	-0.589623	0.450577	1
1555	OG0006899	152.911	181.338	265.275	264.599	127.552	170.318	725.95	683.57	95.8484	92.1349	0.0158727	-0.0158727	-1.78411	1.78411	0.373617	-0.373617	0.245477	-0.245477	0.451274	1
304	OG0003030	156.989	167.007	802.645	782.325	145.715	160.49	653.183	854.941	139.431	121.065	0.167641	-0.167641	-0.630974	0.630974	-1.74939	1.74939	0.921913	-0.921913	0.455025	1
1296	OG0005337	623.264	623.045	408.661	306.23	67.0338	93.891	78.3053	108.204	633.15	613.983	1.11494	-1.11494	-1.29867	1.29867	-1.24743	1.24743	0.119589	-0.119589	0.456233	1
167	OG0002645	499.31	694.741	1173.25	1487.12	372.927	303.135	1863.87	1500.65	806.531	766.765	-0.991954	0.991954	0.867952	-0.867952	0.907674	-0.907674	0.21251	-0.21251	0.457175	1
1235	OG0005195	418.571	459.54	539.746	563.865	645.8	516.515	175.974	203.162	265.031	226.654	-0.286087	0.286087	1.45604	-1.45604	-0.938716	0.938716	1.02172	-1.02172	0.457396	1
1155	OG0005021	164.938	157.451	262.302	252.898	212.872	238.874	369.885	335.804	168.698	153.681	0.415436	-0.415436	-1.30997	1.30997	1.09914	-1.09914	1.06015	-1.06015	0.458266	1
1001	OG0004655	186.15	145.506	232.112	203.53	262.743	309.18	77.7363	75.2967	74.2986	63.0976	0.768297	-0.768297	-0.950813	0.950813	0.186682	-0.186682	0.954666	-0.954666	0.459706	1
804	OG0004223	463.421	463.234	306.419	376.235	440.531	417.34	337.835	329.671	440.806	442.87	-2.03682	2.03682	0.538379	-0.538379	0.243599	-0.243599	-0.046516	0.046516	0.459931	1
1017	OG0004686	291.141	307.305	281.17	308.696	265.787	273.76	571.706	423.901	223.377	219.465	-0.623055	0.623055	-0.197294	0.197294	1.98215	-1.98215	0.117929	-0.117929	0.46092	1
1380	OG0005528	151.69	141.814	428.241	425.274	59.3053	68.4008	407.712	304.573	158.89	151.838	0.0442979	-0.0442979	-0.907797	0.907797	1.84563	-1.84563	0.289246	-0.289246	0.461083	1
257	OG0002936	183.701	143.986	179.259	224.113	398.898	397.169	813.343	514.748	173.963	161.008	-0.838682	0.838682	0.0163825	-0.0163825	1.69576	-1.69576	0.29172	-0.29172	0.463613	1
1228	OG0005177	331.717	359.64	286.245	290.895	383.981	393.332	315.727	297.602	150.527	147.049	-0.320085	0.320085	-0.477978	0.477978	1.17409	-1.17409	0.464368	-0.464368	0.465917	1
1320	OG0005394	662.003	744.033	272.328	243.462	723.432	678.027	257.636	364.152	882.393	935.683	0.610705	-0.610705	0.353538	-0.353538	-1.86934	1.86934	-0.319854	0.319854	0.466191	1
1127	OG0004966	142.719	119.663	117.933	163.018	65.5188	78.4443	140.417	108.304	77.6758	79.9731	-1.40845	1.40845	-0.788013	0.788013	1.13319	-1.13319	-0.127895	0.127895	0.46819	1
1587	OG0007802	639.372	619.807	358.06	375.732	1785.63	1585.62	623.784	819.856	908.791	890.942	-0.337703	0.337703	0.831915	-0.831915	-1.90448	1.90448	0.139066	-0.139066	0.468447	1
1086	OG0004852	81.5546	79.7027	120.588	156.899	51.2952	57.4785	164.658	84.4781	73.3353	62.0971	-0.767094	0.767094	-0.333235	0.333235	1.88663	-1.88663	0.486445	-0.486445	0.470122	1
493	OG0003452	742.642	626.55	360.768	455.39	156.881	178.278	361.104	316	215.657	205.829	-1.42739	1.42739	-0.786007	0.786007	0.82012	-0.82012	0.287083	-0.287083	0.471104	1
190	OG0002783	194.911	196.977	115.713	109.154	201.511	202.603	192.007	242.245	155.03	149.809	0.512715	-0.512715	-0.0474942	0.0474942	-2.03363	2.03363	0.30104	-0.30104	0.471881	1
341	OG0003111	614.105	551.411	835.917	772.993	1042.65	1059.63	735.017	903.434	965.113	954.117	0.675443	-0.675443	-0.139476	0.139476	-1.77524	1.77524	0.0989476	-0.0989476	0.471936	1
451	OG0003351	308.269	256.916	145.756	156.298	200.284	213.379	281.261	258.496	337.399	347.164	-0.663356	0.663356	-0.60162	0.60162	0.801591	-0.801591	-0.271103	0.271103	0.473343	1
1318	OG0005389	142.105	184.38	183.198	173.386	403.766	403.464	473.188	563.739	131.39	130.094	0.367905	-0.367905	0.00500723	-0.00500723	-1.16754	1.16754	0.0662199	-0.0662199	0.474878	1
1054	OG0004788	76.0478	111.193	82.6148	134.675	127.444	133.048	453.54	341.601	62.5588	68.7326	-1.4979	1.4979	-0.134501	0.134501	0.880148	-0.880148	-0.293993	0.293993	0.47653	1
1065	OG0004809	421.627	374.405	1372.11	1222.21	817.07	565.41	342.287	429.665	609.829	604.589	0.533283	-0.533283	1.68012	-1.68012	-1.04472	1.04472	0.0398256	-0.0398256	0.478381	1
943	OG0004523	1249.36	1513.87	1178.5	1177.83	202.712	160.307	270.136	434.289	1399.77	1513.59	0.00217053	-0.00217053	0.883629	-0.883629	-1.7628	1.7628	-0.295533	0.295533	0.479643	1
1519	OG0006562	138.028	122.052	237.569	249.4	216.612	194.113	749.858	672.245	174.652	186.85	-0.48099	0.48099	1.08445	-1.08445	1.08047	-1.08047	-0.668014	0.668014	0.482436	1
766	OG0004131	215.097	213.262	162.112	149.114	180.445	208.971	612.138	479.495	183.976	185.375	0.598583	-0.598583	-1.04986	1.04986	1.74149	-1.74149	-0.0543042	0.0543042	0.483725	1
1510	OG0006507	324.579	246.056	228.483	288.104	238.818	236.372	401.084	283.226	396.098	348.086	-0.952224	0.952224	0.0424578	-0.0424578	1.42097	-1.42097	0.532301	-0.532301	0.484133	1
40	OG0001558	1524.22	1291.96	1095.59	991.216	277.795	257.577	255.792	400.947	1925.33	1922.67	0.434679	-0.434679	0.328194	-0.328194	-1.92084	1.92084	0.00601266	-0.00601266	0.488357	1
1573	OG0007112	144.752	138.557	128.359	115.102	188.034	152.218	198.222	191.41	89.4157	107.245	0.760856	-0.760856	1.47084	-1.47084	0.244312	-0.244312	-1.26677	1.26677	0.489079	1
1068	OG0004816	233.852	220.648	347.625	306.587	66.0983	81.3828	245.092	197.776	246.215	232.735	0.79914	-0.79914	-1.32031	1.32031	1.36111	-1.36111	0.358561	-0.358561	0.49087	1
46	OG0001621	252.199	232.593	265.188	289.162	650.501	336.001	415.24	623.387	268.085	193.668	-0.221675	0.221675	1.6341	-1.6341	-1.02723	1.02723	0.826076	-0.826076	0.490894	1
1202	OG0005126	238.543	246.705	97.1569	97.7481	449.144	450.246	351.187	370.654	228.687	195.142	-0.0753835	0.0753835	-0.03046	0.03046	-0.67026	0.67026	1.96708	-1.96708	0.491753	1
774	OG0004150	228.757	296.876	174.865	174.596	195.598	247.769	561.008	407.047	326.303	278.061	0.00653919	-0.00653919	-1.00001	1.00001	1.3516	-1.3516	0.678357	-0.678357	0.492521	1
635	OG0003822	121.309	131.173	191.656	184.785	135.238	147.334	185.771	148.717	72.8512	75.3663	0.303728	-0.303728	-0.712323	0.712323	1.84337	-1.84337	-0.282368	0.282368	0.493295	1
1298	OG0005342	122.129	100.803	151.54	169.219	83.9429	96.2573	136.584	82.8368	74.6186	70.5772	-0.419629	0.419629	-0.520282	0.520282	1.86491	-1.86491	0.211918	-0.211918	0.493356	1
1184	OG0005089	120.494	72.1017	155.66	119.051	9.65538	48.9975	273.214	258.329	55.8028	44.409	0.383099	-0.383099	-1.92826	1.92826	0.0805017	-0.0805017	0.326847	-0.326847	0.493494	1
498	OG0003466	82.3661	90.3421	175.44	164.505	169.512	148.65	775.896	624.057	76.2285	94.8989	0.386726	-0.386726	0.788311	-0.788311	1.30394	-1.30394	-1.31167	1.31167	0.493736	1
1500	OG0006417	156.375	206.53	636.247	695.941	1106.79	925.166	734.092	915.427	237.69	247.29	-0.466181	0.466181	0.929947	-0.929947	-1.14371	1.14371	-0.205947	0.205947	0.495446	1
1213	OG0005150	245.863	217.358	934.217	956.814	591.522	588.308	258.3	269.99	124.31	120.697	-0.371977	0.371977	0.0847766	-0.0847766	-0.688777	0.688777	0.459117	-0.459117	0.496178	1
1304	OG0005353	1209.63	1380.36	880.328	966.64	1014.43	843.09	275.154	282.858	1100.33	1037.07	-0.781186	0.781186	1.54191	-1.54191	-0.230795	0.230795	0.494739	-0.494739	0.497597	1
1058	OG0004797	409.394	416.103	669.404	566.153	751.411	594.902	291.139	562.114	987.107	1168.64	0.494502	-0.494502	0.687907	-0.687907	-1.87927	1.87927	-0.498291	0.498291	0.498976	1
661	OG0003897	190.833	168.092	115.563	163.723	147.002	143.691	129.624	129.817	90.5446	80.3435	-1.89041	1.89041	0.124879	-0.124879	-0.00817351	0.00817351	0.654418	-0.654418	0.503055	1
354	OG0003140	161.88	160.055	324.925	301.347	233.474	264.249	544.771	363.013	216.624	241.393	0.363444	-0.363444	-0.596902	0.596902	1.93289	-1.93289	-0.522072	0.522072	0.505624	1
563	OG0003643	396.957	615.9	91.7942	98.0758	58.9772	70.553	185.537	162.933	120.455	121.99	-0.286382	0.286382	-0.773591	0.773591	0.561503	-0.561503	-0.0547995	0.0547995	0.506887	1
632	OG0003816	71.5624	76.4451	96.8758	118.664	285.424	241.716	68.7885	80.4575	51.9447	50.6742	-1.37145	1.37145	1.1249	-1.1249	-1.06074	1.06074	0.167971	-0.167971	0.510221	1
715	OG0004028	348.635	306.434	328.201	275.352	884.222	1048.75	699.341	605.645	739.061	733.897	1.19332	-1.19332	-1.15995	1.15995	0.978479	-0.978479	0.0477775	-0.0477775	0.510814	1
121	OG0002351	258.063	294.407	174.365	323.36	77.4943	64.6459	137.056	173.548	574.933	442.798	-1.74276	1.74276	0.526249	-0.526249	-0.683987	0.683987	0.755859	-0.755859	0.5109	1
1517	OG0006556	524.587	445.206	448.47	654.952	117.068	77.4629	46.727	33.1414	446.757	455.143	-1.18515	1.18515	1.28942	-1.28942	1.0773	-1.0773	-0.0588887	0.0588887	0.513161	1
462	OG0003373	414.695	490.378	64.9431	93.5687	538.886	614.402	888.902	731.356	206.331	194.22	-1.64457	1.64457	-0.596296	0.596296	0.885489	-0.885489	0.27535	-0.27535	0.513398	1
1140	OG0004990	446.706	424.355	927.081	833.578	172.915	213.191	631.312	686.82	556.363	529.764	0.870892	-0.870892	-1.71064	1.71064	-0.690584	0.690584	0.401601	-0.401601	0.515499	1
30	OG0001466	1521.57	1240.5	1961.21	1706.9	1254.64	1499.68	1221.62	607.82	375.031	472.283	0.381235	-0.381235	-0.489206	0.489206	1.84496	-1.84496	-0.631147	0.631147	0.517462	1
844	OG0004296	94.8049	111.627	99.2589	92.6147	127.1	107.778	53.7815	120	182.85	165.106	0.182279	-0.182279	0.433026	-0.433026	-2.00579	2.00579	0.268442	-0.268442	0.51774	1
1553	OG0006880	372.082	461.711	1896.41	1793.96	1122.56	1245.04	937.303	853.875	336.111	323.581	0.44473	-0.44473	-0.82877	0.82877	0.74621	-0.74621	0.304292	-0.304292	0.519357	1
861	OG0004339	1535.43	1802.76	1651.3	1654.23	1185.48	1168.23	958.495	918.442	1281.09	1457.94	-0.0178695	0.0178695	0.147637	-0.147637	0.429815	-0.429815	-1.30055	1.30055	0.519592	1
331	OG0003083	349.251	417.625	282.394	318.116	97.6661	102.447	173.812	150.529	208.903	178.557	-0.82588	0.82588	-0.331661	0.331661	0.996635	-0.996635	1.08736	-1.08736	0.519598	1
1046	OG0004770	788.477	832.147	123.761	59.0889	427.88	648.428	290.399	720.329	607.579	659.688	1.26743	-1.26743	-0.734285	0.734285	-1.52428	1.52428	-0.147346	0.147346	0.520041	1
434	OG0003305	194.913	180.471	251.37	222.318	116.977	136.171	238.368	204.545	235.117	232.915	1.00246	-1.00246	-1.23931	1.23931	1.24816	-1.24816	0.0768783	-0.0768783	0.520141	1
1601	OG0008800	238.953	205.229	106.346	128.736	333.016	307.22	196.708	159.809	95.2035	89.3727	-1.20383	1.20383	0.509256	-0.509256	1.30811	-1.30811	0.399278	-0.399278	0.521565	1
1095	OG0004882	128.649	132.476	323.225	330.752	188.877	167.314	211.006	124.891	138.787	185.928	-0.08101	0.08101	0.426136	-0.426136	1.80467	-1.80467	-1.02194	1.02194	0.524028	1
1069	OG0004818	215.501	283.629	656.636	562.61	146.692	157.435	622.694	735.377	582.49	610.115	0.897204	-0.897204	-0.410958	0.410958	-0.965311	0.965311	-0.269491	0.269491	0.524112	1
1319	OG0005391	618.58	575.73	992.405	1009.76	609.441	669.966	735.748	690.574	574.285	494.832	-0.182771	0.182771	-0.997259	0.997259	0.667651	-0.667651	1.56661	-1.56661	0.524337	1
293	OG0003004	72.7836	60.3743	71.0241	106.516	160.574	130.053	189.654	170.834	66.7401	43.8562	-1.30736	1.30736	0.686803	-0.686803	0.341426	-0.341426	1.35318	-1.35318	0.527034	1
91	OG0002065	1245.1	1567.04	4802.01	4255.61	1030.15	908.038	3050.44	3993.52	1691.98	2006.33	0.597527	-0.597527	0.624077	-0.624077	-1.32616	1.32616	-0.841919	0.841919	0.527568	1
633	OG0003818	2584.94	2485.82	1322.28	1003.98	2404.55	2569.69	1961.01	2517.87	2890.33	2154.95	1.21673	-1.21673	-0.295213	0.295213	-1.10558	1.10558	1.2961	-1.2961	0.52915	1
659	OG0003891	571.274	455.848	866.716	842.04	75.8328	61.3367	534.874	623.923	605.809	573.632	0.174962	-0.174962	1.2804	-1.2804	-0.931049	0.931049	0.330539	-0.330539	0.529536	1
1233	OG0005188	603.438	654.981	1858.65	1691.37	396.189	367.41	156.514	132.8	1394.14	1683.49	0.691844	-0.691844	0.553346	-0.553346	1.20342	-1.20342	-1.38033	1.38033	0.529846	1
429	OG0003293	182.472	175.044	111.377	148.043	44.6814	69.2368	198.081	161.92	81.3731	66.339	-1.01463	1.01463	-1.54741	1.54741	0.72108	-0.72108	0.730654	-0.730654	0.530198	1
1156	OG0005022	234.466	281.674	373.692	275.219	396.31	505.248	258.206	370.42	306.847	300.73	1.15292	-1.15292	-0.918019	0.918019	-1.3562	1.3562	0.0764873	-0.0764873	0.532972	1
327	OG0003077	119.271	125.307	244.53	170.546	20.3231	79.333	268.716	262.182	195.235	167.317	0.606168	-0.606168	-2.01375	2.01375	0.0418506	-0.0418506	0.261877	-0.261877	0.533398	1
54	OG0001726	241.19	184.817	69.1002	119.206	83.5217	67.496	274.3	197.342	125.118	84.027	-1.39044	1.39044	0.554521	-0.554521	0.852646	-0.852646	1.02665	-1.02665	0.533805	1
742	OG0004082	95.2126	127.698	102.185	88.1693	179.408	128.521	204.376	478.121	120.938	138.939	0.333283	-0.333283	0.747998	-0.747998	-1.81549	1.81549	-0.313537	0.313537	0.534291	1
970	OG0004586	138.843	158.32	89.08	111.224	194.783	195.817	91.3709	85.484	156.477	150.547	-1.74771	1.74771	-0.0418332	0.0418332	0.526222	-0.526222	0.305386	-0.305386	0.536057	1
1503	OG0006441	174.93	134.213	186.612	178.539	248.01	228.988	437.16	499.131	130.425	117.011	0.286782	-0.286782	0.517256	-0.517256	-0.858537	0.858537	0.703158	-0.703158	0.537427	1
1292	OG0005322	99.2903	71.0158	73.6852	105.727	147.309	141.811	44.6922	46.3108	62.0763	53.254	-1.47482	1.47482	0.157036	-0.157036	-0.146882	0.146882	0.631704	-0.631704	0.538459	1
322	OG0003068	276.463	251.702	317.763	252.106	259.243	246.536	174.409	229.476	215.178	175.241	1.15013	-1.15013	0.250793	-0.250793	-1.36106	1.36106	1.02116	-1.02116	0.539899	1
942	OG0004522	653.442	641.29	977.647	936.394	819.599	815.033	389.344	484.487	930.175	882.833	0.399499	-0.399499	0.0517765	-0.0517765	-2.01821	2.01821	0.484025	-0.484025	0.540384	1
56	OG0001768	519.219	448.105	527.593	603.956	358.373	337.005	498.516	400.947	317.466	320.266	-0.950394	0.950394	0.432753	-0.432753	1.52766	-1.52766	-0.0618456	0.0618456	0.540471	1
838	OG0004286	113.354	91.6473	122.35	126.283	91.7296	105.285	361.507	245.393	94.081	94.5304	-0.146056	0.146056	-0.635136	0.635136	1.76617	-1.76617	-0.0219932	0.0219932	0.540978	1
839	OG0004287	818.955	796.658	1958.01	2092.61	334.748	164.773	376.562	474.122	855.881	871.227	-0.19527	0.19527	1.9996	-1.9996	-0.673932	0.673932	-0.0522135	0.0522135	0.54332	1
1216	OG0005155	87.0574	103.375	91.6849	91.2324	275.549	244.825	286.374	366.498	92.4728	93.9776	0.032566	-0.032566	0.777337	-0.777337	-1.61578	1.61578	-0.106254	0.106254	0.544058	1
1087	OG0004856	93.3757	93.604	80.7095	94.4675	106.975	115.69	405.679	378.094	117.398	110.009	-1.66637	1.66637	-0.83043	0.83043	0.746746	-0.746746	0.689424	-0.689424	0.550397	1
888	OG0004410	268.514	216.739	426.71	474.81	127.158	103.118	502.683	553.608	227.884	198.459	-0.630561	0.630561	1.23383	-1.23383	-0.569781	0.569781	0.815696	-0.815696	0.552226	1
531	OG0003572	212.037	317.727	71.5707	102.898	94.6339	57.465	913.518	617.02	197.969	230.52	-0.910363	0.910363	1.23898	-1.23898	0.982179	-0.982179	-0.385155	0.385155	0.553366	1
274	OG0002966	143.329	124.226	115.072	112.113	91.0826	103.218	94.6375	87.6622	88.7724	79.0517	0.233629	-0.233629	-1.12027	1.12027	0.686301	-0.686301	1.03891	-1.03891	0.553828	1
823	OG0004260	154.134	137.249	176.814	184.337	171.744	178.336	124.51	118.458	260.528	262.584	-0.639	0.639	-0.577612	0.577612	0.764085	-0.764085	-0.120609	0.120609	0.554497	1
689	OG0003964	91.5407	100.115	219.253	208.966	153.008	176.608	134.69	91.4827	296.55	321.368	0.238108	-0.238108	-0.709593	0.709593	1.89334	-1.89334	-0.398072	0.398072	0.555768	1
862	OG0004344	210.608	183.51	323.831	395.788	243.886	266.785	176.112	108.907	107.669	99.6715	-0.780694	0.780694	-0.350088	0.350088	1.84095	-1.84095	0.301137	-0.301137	0.556381	1
668	OG0003913	661.65	672.439	155.204	142.745	122.327	155.103	160.965	129.817	73.3337	65.7843	0.510528	-0.510528	-1.44237	1.44237	1.30776	-1.30776	0.662522	-0.662522	0.55863	1
845	OG0004302	282.576	205.878	67.9071	95.1911	332.081	330.741	573.412	334.397	316.334	282.301	-1.00293	1.00293	0.0121173	-0.0121173	1.57849	-1.57849	0.340832	-0.340832	0.559977	1
881	OG0004398	204.289	188.07	329.881	331.501	237.912	237.776	679.457	547.889	129.458	142.441	-0.0417516	0.0417516	0.00488471	-0.00488471	1.82735	-1.82735	-0.81393	0.81393	0.56028	1
731	OG0004056	64.4265	72.7554	122.278	124.927	335.709	407.746	112.959	87.427	58.2151	51.2288	-0.124212	0.124212	-1.12304	1.12304	1.47676	-1.47676	0.739847	-0.739847	0.563334	1
767	OG0004139	1344.24	1431.7	2134.03	1978.07	319.712	281.31	61.262	77.944	1245.77	1391.05	0.520303	-0.520303	0.87654	-0.87654	-1.644	1.644	-0.755899	0.755899	0.564504	1
1250	OG0005225	280.133	283.192	137.776	141.667	572.662	555.576	435.503	460.894	293.978	288.382	-0.804805	0.804805	0.875196	-0.875196	-1.63691	1.63691	0.555304	-0.555304	0.565322	1
155	OG0002545	1348.16	1458.03	1252.95	1224.4	745.456	673.661	69.262	84.279	955.266	991.003	0.205672	-0.205672	0.902891	-0.902891	-1.74551	1.74551	-0.327694	0.327694	0.565637	1
1115	OG0004935	482.793	321.639	604.867	685.953	136.041	158.439	252.808	200.625	328.551	261.112	-0.482769	0.482769	-0.584537	0.584537	0.884458	-0.884458	0.878954	-0.878954	0.569471	1
548	OG0003615	326.414	349.869	607.491	618.616	96.4584	98.5481	426.886	397.396	504.652	502.321	-0.371437	0.371437	-0.438683	0.438683	1.46457	-1.46457	0.0947393	-0.0947393	0.570884	1
379	OG0003192	453.432	588.754	812.327	732.699	999.526	966.044	277.001	302.16	706.154	817.417	0.66504	-0.66504	0.219803	-0.219803	-0.560565	0.560565	-0.942333	0.942333	0.571124	1
306	OG0003032	245.673	288.409	123.689	149.445	533.147	543.132	329.93	250.426	403.659	365.962	-1.04636	1.04636	-0.102944	0.102944	1.52012	-1.52012	0.543518	-0.543518	0.571488	1
1105	OG0004911	121.305	178.519	143.763	176.595	54.8907	44.8206	150.596	134.407	68.0267	65.6	-0.882614	0.882614	0.869762	-0.869762	0.489177	-0.489177	0.156394	-0.156394	0.573907	1
1120	OG0004946	331.513	350.084	221.087	189.665	375.135	403.304	92.3651	86.0169	290.281	308.468	1.61529	-1.61529	-0.764085	0.764085	0.751451	-0.751451	-0.641373	0.641373	0.574661	1
588	OG0003707	212.493	211.08	104.412	58.216	262.501	123.712	119.302	237.485	401.764	440.182	1.0625	-1.0625	1.34415	-1.34415	-1.23898	1.23898	-0.170673	0.170673	0.57533	1
1426	OG0005637	418.571	434.784	657.582	664.092	1027.13	987.122	990.687	1204.79	375.031	350.851	-0.0978666	0.0978666	0.394627	-0.394627	-1.93757	1.93757	0.66184	-0.66184	0.576187	1
425	OG0003286	137.824	131.175	99.0059	100.668	106.584	104.704	443.741	578.844	161.786	142.625	-0.118606	0.118606	0.126748	-0.126748	-1.882	1.882	0.89664	-0.89664	0.577718	1
209	OG0002817	263.209	303.826	193.118	165.579	128.536	130.295	297.547	321.396	284.007	278.983	1.44885	-1.44885	-0.128288	0.128288	-0.727144	0.727144	0.168427	-0.168427	0.578676	1
488	OG0003439	278.035	211.052	129.646	317.973	241.745	196.61	492.958	351.51	94.0794	107.8	-1.82544	1.82544	0.446733	-0.446733	0.726738	-0.726738	-0.294871	0.294871	0.579551	1
1057	OG0004796	221.01	213.699	169.783	157.541	488.298	362.152	213.136	338.752	391.596	471.546	0.273633	-0.273633	1.0852	-1.0852	-1.66525	1.66525	-0.677682	0.677682	0.579778	1
486	OG0003436	169.426	189.81	472.12	390.47	205.767	209.47	73.003	100.797	384.039	393.692	1.03023	-1.03023	-0.0970576	0.0970576	-1.74056	1.74056	-0.135097	0.135097	0.580014	1
23	OG0001350	581.403	631.728	928.661	1077.92	889.081	783.404	293.709	335.937	556.583	531.989	-1.23765	1.23765	1.05132	-1.05132	-1.11589	1.11589	0.375927	-0.375927	0.582216	1
1273	OG0005283	229.365	256.046	504.706	525.93	323.563	315.564	329.063	313.278	203.598	221.124	-0.568313	0.568313	0.345407	-0.345407	0.678154	-0.678154	-1.1388	1.1388	0.58292	1
179	OG0002761	155.969	167.004	28.1192	92.1118	171.279	132.512	104.911	93.7945	129.138	107.429	-2.02042	2.02042	0.48441	-0.48441	0.212362	-0.212362	0.348344	-0.348344	0.583194	1
151	OG0002526	447.52	379.407	239.746	268.291	287.169	314.647	252.81	212.285	328.073	280.641	-0.743645	0.743645	-0.604285	0.604285	1.1532	-1.1532	1.03129	-1.03129	0.583966	1
985	OG0004615	513.985	480.386	371.418	451.538	380.828	339.971	389.118	332.873	583.452	553.544	-1.43915	1.43915	0.837889	-0.837889	1.15158	-1.15158	0.388827	-0.388827	0.587483	1
408	OG0003255	828.778	792.035	281.373	198.053	857.022	666.998	451.506	645.837	873.411	865.148	1.32302	-1.32302	0.949203	-0.949203	-1.34816	1.34816	0.0361793	-0.0361793	0.588628	1
1393	OG0005564	516.154	672.804	657.017	607.275	257.77	149.939	200.873	592.524	951.571	1088.11	0.143766	-0.143766	0.966439	-0.966439	-1.8038	1.8038	-0.244613	0.244613	0.588663	1
17	OG0001257	1064.26	1216.83	255.924	258.589	165.705	135.104	497.927	632.603	1693.63	1880.74	-0.0616324	0.0616324	1.21052	-1.21052	-1.41754	1.41754	-0.622901	0.622901	0.589275	1
615	OG0003769	251.995	302.091	253.026	312.632	377.23	410.678	362.548	318.077	139.109	133.043	-1.39043	1.39043	-0.560152	0.560152	0.862136	-0.862136	0.294109	-0.294109	0.589745	1
10	OG0001186	119.676	164.837	130.264	105	510.32	461.68	1379.42	1569.04	76.7093	115.908	0.782347	-0.782347	0.364572	-0.364572	-0.46855	0.46855	-1.48262	1.48262	0.590259	1
999	OG0004652	185.126	148.545	110.041	122.188	183.566	330.922	395.735	245.693	373.745	189.063	-0.217963	0.217963	-1.19342	1.19342	0.974689	-0.974689	1.36731	-1.36731	0.592793	1
749	OG0004098	555.577	549.013	308.889	264.943	2764.38	1912.93	357.483	465.958	1078.13	1122.21	0.68171	-0.68171	1.62039	-1.62039	-1.17261	1.17261	-0.178293	0.178293	0.593382	1
702	OG0003992	294.609	310.778	616.211	598.984	104.776	92.0334	273.497	335.168	321.48	344.032	0.233962	-0.233962	1.06855	-1.06855	-1.67224	1.67224	-0.559268	0.559268	0.594088	1
490	OG0003443	157.293	162.313	135.97	144.133	665.604	739.71	407.333	364.991	242.773	207.969	-0.545475	0.545475	-0.987016	0.987016	1.02615	-1.02615	1.44528	-1.44528	0.594743	1
1008	OG0004665	693.228	851.175	1570.62	1516.35	208.225	184.64	1006.17	1223.85	1284.83	1375.19	0.235576	-0.235576	0.804526	-0.804526	-1.30821	1.30821	-0.455257	0.455257	0.594874	1
116	OG0002317	555.983	464.098	2370.53	2574.67	122.166	131.678	419.691	374.576	953.391	830.399	-0.631934	0.631934	-0.573618	0.573618	0.869531	-0.869531	1.05552	-1.05552	0.595248	1
1060	OG0004800	188.59	160.709	218.535	285.872	136.886	114.224	185.156	172.945	540.997	448.513	-1.37796	1.37796	0.93152	-0.93152	0.351976	-0.351976	0.964748	-0.964748	0.596201	1
700	OG0003984	377.362	409.757	285.433	274.839	177.967	156.317	154.099	256.552	410.09	371.117	0.150555	-0.150555	0.51569	-0.51569	-1.98651	1.98651	0.397218	-0.397218	0.600264	1
223	OG0002849	1070.78	1004.42	1738.93	2184.14	705.015	991.005	1196.91	367.136	524.431	523.146	-0.423067	0.423067	-0.62862	0.62862	1.97778	-1.97778	0.00457399	-0.00457399	0.601113	1
827	OG0004269	171.67	168.307	144.675	160.049	108.911	112.636	211.43	179.546	139.431	131.204	-1.04446	1.04446	-0.348045	0.348045	1.6882	-1.6882	0.629289	-0.629289	0.602241	1
492	OG0003449	57.2907	59.9421	91.182	260.062	184.851	177.392	86.3057	66.7519	57.4126	46.0674	-1.99854	1.99854	0.0855821	-0.0855821	0.531029	-0.531029	0.455718	-0.455718	0.603123	1
1504	OG0006445	713.589	669.759	417.902	523.039	1079.61	915.316	380.349	367.336	807.636	898.866	-1.54843	1.54843	1.14129	-1.14129	0.241191	-0.241191	-0.740855	0.740855	0.603225	1
1004	OG0004659	277.895	287.104	128.84	50.7918	37.0134	53.6676	171.101	198.824	224.665	210.25	1.92399	-1.92399	-0.813261	0.813261	-0.331855	0.331855	0.146768	-0.146768	0.603502	1
323	OG0003070	241.194	283.194	318.569	335.534	78.8045	91.4902	161.343	142.619	282.233	284.947	-0.428934	0.428934	-1.23189	1.23189	1.01873	-1.01873	-0.0791297	0.0791297	0.604642	1
1101	OG0004901	126.612	115.102	38.7072	125.741	135.906	133.633	102.449	68.7297	280.477	240.385	-1.96281	1.96281	0.0312776	-0.0312776	0.730547	-0.730547	0.285465	-0.285465	0.606495	1
309	OG0003040	687.079	443.684	246.948	410.14	904.952	939.253	499.747	227.098	147.792	123.278	-1.03874	1.03874	-0.0777901	0.0777901	1.56889	-1.56889	0.378226	-0.378226	0.607069	1
1212	OG0005147	1036.35	1088.06	729.116	565.689	142.452	136.227	237.185	366.531	833.042	908.903	1.05163	-1.05163	0.186118	-0.186118	-1.78512	1.78512	-0.362852	0.362852	0.608224	1
1265	OG0005266	602.064	484.08	204.38	232.439	121.061	128.742	501.782	378.864	534.247	509.504	-0.709202	0.709202	-0.33948	0.33948	1.54106	-1.54106	0.261737	-0.261737	0.608283	1
181	OG0002763	222.637	226.731	184.157	168.778	88.8067	112.629	153.436	135.347	223.539	248.397	0.613974	-0.613974	-1.66634	1.66634	0.882621	-0.882621	-0.742183	0.742183	0.608548	1
574	OG0003670	168.606	173.305	176.077	162.613	273.294	243.655	535.3	637.63	227.883	209.885	0.703773	-0.703773	1.01502	-1.01502	-1.5445	1.5445	0.727839	-0.727839	0.610754	1
351	OG0003135	186.957	205.005	176.27	206.003	332.932	218.857	148.182	186.014	168.056	138.018	-0.609181	0.609181	1.61922	-1.61922	-0.886638	0.886638	0.768664	-0.768664	0.611912	1
1181	OG0005079	286.044	300.349	434.675	561.471	50.0153	43.6975	619.334	501.31	652.765	612.513	-1.47645	1.47645	0.781984	-0.781984	1.22163	-1.22163	0.36901	-0.36901	0.612309	1
317	OG0003057	196.132	215.871	155.319	215.527	128.056	118.017	190.837	188.996	352.679	323.578	-1.91947	1.91947	0.482355	-0.482355	0.0573049	-0.0573049	0.508772	-0.508772	0.612471	1
631	OG0003810	509.298	423.054	688.381	799.961	468.787	456.946	686.182	535.457	356.698	356.376	-0.924939	0.924939	0.157815	-0.157815	1.52221	-1.52221	0.00556832	-0.00556832	0.61307	1
1071	OG0004820	992.493	970.769	1293.59	1433.18	317.68	244.774	77.973	81.8321	699.245	691.013	-0.76479	0.76479	1.93644	-1.93644	-0.360767	0.360767	0.0884519	-0.0884519	0.613187	1
313	OG0003052	5682.79	5482.98	7472.03	7561.37	4017.17	3677.84	1434.85	1978.06	7370.44	6693.79	-0.0728479	0.0728479	0.540551	-0.540551	-1.95104	1.95104	0.589757	-0.589757	0.614669	1
1293	OG0005323	1042.04	982.277	815.431	571.565	173.208	221.154	987.8	772.841	510.6	585.425	1.45034	-1.45034	-1.00289	1.00289	1.00711	-1.00711	-0.563143	0.563143	0.615087	1
1018	OG0004688	145.573	133.13	77.9985	92.7867	239.285	237.056	515.89	340.562	125.764	133.043	-0.80387	0.80387	0.0434445	-0.0434445	1.90051	-1.90051	-0.261095	0.261095	0.615531	1
908	OG0004452	619.396	693.216	817.181	747.021	541.055	616.324	324.532	294.788	770.206	752.679	0.874305	-0.874305	-1.2677	1.2677	0.936183	-0.936183	0.224345	-0.224345	0.615612	1
594	OG0003724	233.24	236.724	125.651	157.625	419.4	386.699	590.738	534.418	296.07	316.946	-1.77945	1.77945	0.639539	-0.639539	0.789114	-0.789114	-0.536853	0.536853	0.618464	1
1442	OG0005807	154.948	199.8	239.33	188.555	208.872	201.27	202.815	235.374	226.915	228.679	1.3277	-1.3277	0.207387	-0.207387	-0.831358	0.831358	-0.0433221	0.0433221	0.619579	1
1568	OG0007085	119.678	168.744	212.551	136.855	583.274	488.963	233.114	306.684	147.793	164.369	1.41822	-1.41822	0.575803	-0.575803	-0.892215	0.892215	-0.347607	0.347607	0.619621	1
67	OG0001930	182.882	197.192	240.483	228.681	260.048	231.941	462.015	653.948	278.7	271.245	0.284902	-0.284902	0.647064	-0.647064	-1.948	1.948	0.153542	-0.153542	0.621912	1
1391	OG0005562	230.996	245.189	146.64	157.827	164.84	158.405	519.014	517.931	271.14	271.984	-1.5175	1.5175	0.822074	-0.822074	0.0431447	-0.0431447	-0.0641717	0.0641717	0.622209	1
1430	OG0005642	385.54	589.192	873.203	669.596	289.966	301.558	550.071	444.171	1190.39	1546.02	0.934806	-0.934806	-0.138805	0.138805	0.754472	-0.754472	-0.92057	0.92057	0.622422	1
138	OG0002454	375.754	428.484	214.675	197.803	238.669	232.936	112.673	199.088	235.602	192.376	0.284291	-0.284291	0.0844929	-0.0844929	-1.92654	1.92654	0.702003	-0.702003	0.623636	1
1349	OG0005464	54.0286	61.0258	133.787	150.237	158.133	111.023	105.668	144.529	73.8162	53.8068	-0.417994	0.417994	1.26321	-1.26321	-1.12096	1.12096	1.13154	-1.13154	0.624238	1
1178	OG0005072	214.076	222.82	310.613	330.184	62.9799	49.6333	105.006	122.412	316.223	370.539	-0.390722	0.390722	1.51626	-1.51626	-0.979215	0.979215	-1.01185	1.01185	0.625383	1
1121	OG0004949	401.443	338.139	152.799	134.603	169.682	202.763	558.025	465.32	259.724	263.32	0.810207	-0.810207	-1.13666	1.13666	1.15931	-1.15931	-0.0879866	0.0879866	0.626232	1
618	OG0003775	315.609	350.084	395.455	294.309	115.872	150.646	268.147	285.673	250.234	288.198	1.43208	-1.43208	-1.27424	1.27424	-0.30904	0.30904	-0.68859	0.68859	0.628292	1
1246	OG0005219	742.432	632.342	515.475	809.426	338.592	315.121	524.175	479.426	513.016	467.678	-1.9048	1.9048	0.308245	-0.308245	0.382805	-0.382805	0.396899	-0.396899	0.62881	1
1596	OG0008056	714.808	783.56	505.811	522.513	1765.91	1543.91	630.318	731.256	854.756	886.706	-0.305725	0.305725	1.26254	-1.26254	-1.39545	1.39545	-0.345352	0.345352	0.630882	1
898	OG0004436	704.816	628.283	145.843	160.111	157.209	154.927	279.319	203.289	482.944	533.461	-0.546117	0.546117	0.0856007	-0.0856007	1.8449	-1.8449	-0.582037	0.582037	0.635927	1
941	OG0004521	1180.68	1015.29	1296.14	1328.5	1083.22	853.104	390.763	461.232	1279.45	1190.95	-0.156081	0.156081	1.50467	-1.50467	-1.04719	1.04719	0.453567	-0.453567	0.636247	1
1342	OG0005448	143.327	158.1	77.099	122.552	149.839	127.838	521.572	374.173	128.818	103.742	-1.53324	1.53324	0.533592	-0.533592	1.10823	-1.10823	0.726178	-0.726178	0.636294	1
106	OG0002221	802.274	855.666	508.044	534.73	830.051	754.029	672.924	637.226	977.617	1025.23	-0.745493	0.745493	1.39804	-1.39804	0.79376	-0.79376	-0.692488	0.692488	0.638162	1
951	OG0004547	139.045	145.506	83.0083	93.2799	281.377	249.007	235.813	260.072	144.577	142.441	-1.23086	1.23086	1.28925	-1.28925	-1.03345	1.03345	0.157229	-0.157229	0.638528	1
1582	OG0007598	189.608	189.81	323.563	359.858	300.634	320.461	167.261	114.865	191.054	199.933	-0.571593	0.571593	-0.343576	0.343576	1.99887	-1.99887	-0.244418	0.244418	0.638649	1
708	OG0004014	355.159	256.916	317.394	243.131	62.5819	114.345	254.039	248.544	285.453	273.274	0.780983	-0.780983	-1.72459	1.72459	0.064448	-0.064448	0.128493	-0.128493	0.638882	1
1546	OG0006800	176.765	198.062	247.444	248.206	680.994	446.117	73.1909	99.1893	246.215	224.074	-0.0121725	0.0121725	1.65182	-1.65182	-1.1955	1.1955	0.373182	-0.373182	0.639826	1
318	OG0003058	107.446	138.122	31.6579	98.2965	80.7803	39.0113	232.169	280.916	132.998	129.91	-1.70029	1.70029	1.15615	-1.15615	-0.315027	0.315027	0.0389404	-0.0389404	0.639858	1
1276	OG0005287	233.444	231.724	148.976	186.216	100.363	125.041	68.6939	36.4264	237.209	214.674	-0.677386	0.677386	-0.667504	0.667504	1.87153	-1.87153	0.304047	-0.304047	0.642139	1
1232	OG0005187	100.31	136.604	76.1682	128.104	195.909	37.9491	30.204	53.9846	102.765	72.6041	-0.667064	0.667064	1.77218	-1.77218	-0.741109	0.741109	0.451239	-0.451239	0.642325	1
1009	OG0004666	297.873	330.326	151.999	116.468	289.747	359.562	128.866	116.313	317.62	321.733	1.51354	-1.51354	-1.22961	1.22961	0.585504	-0.585504	-0.073568	0.073568	0.642989	1
295	OG0003014	246.083	216.305	131.601	170.654	435.56	484.68	479.862	436.735	157.603	136.544	-1.55595	1.55595	-0.642797	0.642797	0.566606	-0.566606	0.862172	-0.862172	0.643573	1
473	OG0003408	56.8829	59.9399	57.5002	94.5649	58.9539	47.566	577.908	579.186	78.6407	73.5236	-1.91823	1.91823	0.841357	-0.841357	-0.00868949	0.00868949	0.264655	-0.264655	0.644567	1
580	OG0003691	210.612	240.192	290.802	252.943	662.048	726.311	368.549	372.362	370.527	359.698	1.37479	-1.37479	-0.913937	0.913937	-0.101595	0.101595	0.292796	-0.292796	0.645102	1
1487	OG0006338	91.7467	98.599	103.847	151.84	148.531	138.55	111.207	105.221	100.03	90.8468	-1.97087	1.97087	0.365063	-0.365063	0.290406	-0.290406	0.505148	-0.505148	0.645126	1
1254	OG0005234	87.6711	82.9603	170.555	115.163	89.2442	99.1114	167.923	192.849	116.112	113.879	1.91834	-1.91834	-0.518366	0.518366	-0.683681	0.683681	0.0960717	-0.0960717	0.646866	1
1590	OG0007905	252.201	316.856	179.544	144.24	254.593	222.775	803.132	850.346	430.514	512.086	1.19369	-1.19369	0.729723	-0.729723	-0.312613	0.312613	-0.947429	0.947429	0.646965	1
930	OG0004496	199.192	240.846	124.705	172.539	224.762	271.615	386.362	266.706	49.6932	52.703	-1.22075	1.22075	-0.716026	0.716026	1.38987	-1.38987	-0.222971	0.222971	0.647278	1
75	OG0001993	208.575	208.487	76.2526	108.923	123.03	107.341	152.396	118.357	126.084	108.535	-1.56536	1.56536	0.604227	-0.604227	1.11541	-1.11541	0.663642	-0.663642	0.647384	1
1450	OG0005919	208.979	176.784	97.5379	89.8501	80.2194	60.7322	65.3325	76.1683	228.523	344.957	0.318111	-0.318111	1.072	-1.072	-0.593765	0.593765	-1.57426	1.57426	0.647823	1
259	OG0002943	277.888	238.676	1245.16	1694.53	73.3031	114.438	1145.69	791.507	597.803	527.227	-0.95832	0.95832	-1.37359	1.37359	1.14619	-1.14619	0.393278	-0.393278	0.649333	1
1495	OG0006388	756.808	836.987	386.476	325.43	1274.27	1161.16	532.791	931.947	685.091	644.574	0.61589	-0.61589	0.333583	-0.333583	-1.95728	1.95728	0.218862	-0.218862	0.654473	1
1395	OG0005574	424.424	521.571	1058.48	992.93	562.297	509.911	201.726	204.142	452.709	496.977	0.533219	-0.533219	0.815254	-0.815254	-0.0993571	0.0993571	-0.777805	0.777805	0.654941	1
1161	OG0005033	161.062	187.64	393.444	338.491	260.307	321.055	300.908	395.017	152.298	127.887	0.725125	-0.725125	-1.00921	1.00921	-1.30604	1.30604	0.841452	-0.841452	0.655443	1
674	OG0003928	315.81	297.313	831.866	855.701	385.026	402.04	206.697	200.658	493.719	456.25	-0.517459	0.517459	-0.792004	0.792004	0.543179	-0.543179	1.44506	-1.44506	0.656686	1
587	OG0003706	233.037	264.733	295.191	306.85	221.08	234.756	505.428	402.086	378.457	393.528	-0.300598	0.300598	-0.465697	0.465697	1.76751	-1.76751	-0.303035	0.303035	0.659242	1
636	OG0003829	165.142	110.324	146.686	223.395	171.686	165.862	74.7063	48.3885	172.879	143.73	-1.18773	1.18773	0.0988745	-0.0988745	1.22512	-1.22512	0.527554	-0.527554	0.659992	1
302	OG0003026	167.389	180.686	201.597	165.991	45.0258	51.3719	173.178	136.955	139.913	164.183	1.09542	-1.09542	-0.744471	0.744471	1.32084	-1.32084	-0.902528	0.902528	0.660613	1
720	OG0004039	415.508	413.058	284.93	307.81	215.227	173.575	323.065	403.493	372.94	385.677	-0.512662	0.512662	1.42281	-1.42281	-1.47022	1.47022	-0.222975	0.222975	0.661663	1
1106	OG0004913	418.363	416.971	342.952	292.556	32.9805	48.3408	362.217	411	230.294	193.299	0.726764	-0.726764	-1.73107	1.73107	-0.578207	0.578207	0.800404	-0.800404	0.662095	1
992	OG0004634	754.973	825.256	524.395	491.158	205.718	171.345	267.885	311.412	1134.26	1143.03	0.532169	-0.532169	1.48228	-1.48228	-1.22176	1.22176	-0.0625856	0.0625856	0.664365	1
554	OG0003625	154.132	144.418	274.602	287.092	316.54	332.197	162.243	137.726	182.53	213.565	-0.38574	0.38574	-0.418665	0.418665	1.41776	-1.41776	-1.35916	1.35916	0.665576	1
825	OG0004264	93.1738	84.0462	206.77	198.258	135.876	135.446	149.318	143.054	125.922	133.411	0.672853	-0.672853	0.0507485	-0.0507485	0.686001	-0.686001	-0.92464	0.92464	0.666731	1
688	OG0003963	191.239	205.446	176.186	180.953	292.521	228.274	142.216	148.182	218.581	237.459	-0.206406	0.206406	1.90783	-1.90783	-0.317748	0.317748	-0.640187	0.640187	0.66702	1
385	OG0003207	142.513	130.954	497.35	528.425	258.387	249.192	221.563	218.519	259.08	263.321	-1.14565	1.14565	0.685064	-0.685064	0.2616	-0.2616	-0.307032	0.307032	0.667194	1
1536	OG0006685	339.465	471.484	1112.09	1164.25	2788.57	662.809	610.575	1117.32	605.003	672.216	-0.069079	0.069079	1.85676	-1.85676	-0.884113	0.884113	-0.158643	0.158643	0.668883	1
508	OG0003493	176.969	214.565	414.888	437.504	981.746	983.732	505.196	352.773	130.746	153.314	-0.257435	0.257435	-0.00980487	0.00980487	1.72376	-1.72376	-0.770868	0.770868	0.669916	1
463	OG0003376	135.991	98.3797	303.777	338.085	32.3289	48.6533	325.243	193.286	87.3266	67.6288	-0.292603	0.292603	-1.10349	1.10349	1.39309	-1.39309	0.695874	-0.695874	0.670737	1
842	OG0004293	321.519	299.48	556.331	622.042	576.058	544.43	154.478	158.033	312.471	302.939	-1.59001	1.59001	0.804815	-0.804815	-0.324341	0.324341	0.441597	-0.441597	0.67125	1
51	OG0001708	490.133	423.269	893.745	901.464	127.531	189.411	521.667	332.722	464.768	388.993	-0.0288002	0.0288002	-1.3079	1.3079	1.48142	-1.48142	0.59455	-0.59455	0.6713	1
1039	OG0004744	112.993	110.876	121.06	115.913	55.4492	76.6385	359.046	270.191	82.9813	70.7577	0.20097	-0.20097	-1.48438	1.48438	1.30664	-1.30664	0.735701	-0.735701	0.671413	1
987	OG0004621	1213.91	1214.44	829.827	814.07	2632.63	2504.73	810.076	892.638	1374.52	1273.86	0.302852	-0.302852	0.786607	-0.786607	-1.53204	1.53204	1.20097	-1.20097	0.671904	1
104	OG0002185	242.825	187.427	275.536	367.756	70.7386	63.8353	286.09	219.658	190.571	178.194	-1.2612	1.2612	0.451293	-0.451293	1.1556	-1.1556	0.295271	-0.295271	0.672029	1
743	OG0004083	1440.99	1351.16	1198.01	735.804	304.655	569.514	622.363	628.849	760.194	875.281	1.28809	-1.28809	-1.63284	1.63284	-0.027934	0.027934	-0.379235	0.379235	0.67354	1
349	OG0003132	264.842	280.591	334.654	329.343	111.408	74.2458	338.308	446.12	502.556	487.025	0.0692025	-0.0692025	1.73206	-1.73206	-1.18926	1.18926	0.135806	-0.135806	0.67412	1
1480	OG0006292	274.83	232.808	286.861	271.572	85.0157	75.0935	122.143	150.998	379.999	332.526	0.353178	-0.353178	0.799437	-0.799437	-1.36277	1.36277	0.859482	-0.859482	0.674767	1
874	OG0004376	904.422	784.216	508.066	573.746	374.309	393.9	306.162	273.842	388.701	338.319	-0.978869	0.978869	-0.411155	0.411155	0.898419	-0.898419	1.1173	-1.1173	0.677877	1
1403	OG0005587	103.98	112.496	39.7192	120.77	71.3879	56.1417	64.9065	49.3267	63.2037	56.0198	-1.97877	1.97877	0.468417	-0.468417	0.534379	-0.534379	0.236089	-0.236089	0.678769	1
762	OG0004123	327.635	276.675	74.1849	99.3446	663.619	587.259	458.986	374.442	257.633	233.101	-1.45557	1.45557	0.612853	-0.612853	1.0184	-1.0184	0.50186	-0.50186	0.679976	1
552	OG0003623	243.229	220.868	190.941	268.087	100.864	82.969	340.581	234.805	200.703	208.776	-1.30858	1.30858	0.757923	-0.757923	1.43138	-1.43138	-0.153508	0.153508	0.680009	1
1062	OG0004803	580.652	465.405	422.681	554.144	344.687	348.065	562.807	512.1	816.962	580.632	-1.15504	1.15504	-0.0418508	0.0418508	0.404863	-0.404863	1.45126	-1.45126	0.681012	1
1308	OG0005362	757.012	683.228	300.853	370.394	562.493	425.562	217.444	263.21	435.66	442.432	-1.07635	1.07635	1.43984	-1.43984	-0.989262	0.989262	-0.080121	0.080121	0.684018	1
793	OG0004198	258.322	218.913	153.345	174.898	94.7688	96.6382	288.363	286.074	237.045	187.032	-0.878297	0.878297	-0.130641	0.130641	0.0533062	-0.0533062	1.57752	-1.57752	0.684344	1
199	OG0002799	220.804	194.151	62.6131	101.408	410.974	403.794	524.98	320.724	194.431	156.629	-1.39119	1.39119	0.0518325	-0.0518325	1.42058	-1.42058	0.63334	-0.63334	0.685287	1
59	OG0001791	711.34	894.756	323.766	249.653	408.861	455.739	280.552	351.119	1045.97	1098.62	1.28157	-1.28157	-0.537625	0.537625	-1.10772	1.10772	-0.243429	0.243429	0.688668	1
192	OG0002785	193.278	191.115	345.42	420.504	286.578	300.895	602.433	504.292	144.9	121.434	-1.29311	1.29311	-0.321464	0.321464	1.16972	-1.16972	1.16222	-1.16222	0.688774	1
443	OG0003327	192.464	200.234	111.737	166.928	382.98	294.105	961.997	703.241	166.77	164.553	-1.4759	1.4759	0.978132	-0.978132	1.15791	-1.15791	0.0498617	-0.0498617	0.691306	1
43	OG0001586	998.609	1008.55	575.777	508.557	430.061	416.178	24.9016	38.8384	1265.97	1119.07	0.557012	-0.557012	0.147409	-0.147409	-1.96463	1.96463	0.553408	-0.553408	0.693302	1
347	OG0003125	108.875	115.756	102.648	82.6368	179.179	228.809	160.632	147.344	231.58	219.281	1.32261	-1.32261	-1.48969	1.48969	0.528399	-0.528399	0.334067	-0.334067	0.693485	1
790	OG0004190	328.516	341.595	594.857	480.791	434.355	382.199	195.429	327.159	658.316	673.078	0.798485	-0.798485	0.480943	-0.480943	-1.89804	1.89804	-0.0834875	0.0834875	0.694625	1
466	OG0003392	517.094	436.102	641.913	775.349	361.61	410.349	918.566	658.37	597.028	528.429	-0.884297	0.884297	-0.593008	0.593008	1.54975	-1.54975	0.572488	-0.572488	0.697854	1
376	OG0003186	204.285	185.462	153.48	174.272	105.551	124.832	306.212	218.587	255.698	232.919	-0.645871	0.645871	-0.852098	0.852098	1.69992	-1.69992	0.474644	-0.474644	0.698077	1
643	OG0003852	523.564	604.173	243.403	246.716	1015.57	702.884	408.234	662.528	1092.12	1174.35	-0.0462887	0.0462887	1.24591	-1.24591	-1.62613	1.62613	-0.24841	0.24841	0.698872	1
768	OG0004141	213.87	244.538	227.018	270.073	133.088	103.786	227.056	243.182	206.653	231.441	-1.03265	1.03265	1.47485	-1.47485	-0.408863	0.408863	-0.674592	0.674592	0.699538	1
971	OG0004591	144.96	128.569	166.41	178.587	126.33	160.043	233.777	199.819	88.6132	84.027	-0.468557	0.468557	-1.56282	1.56282	1.03966	-1.03966	0.352648	-0.352648	0.700657	1
1195	OG0005113	163.515	135.299	117.024	137.206	245.92	243.333	806.903	894.617	240.104	202.697	-1.06418	1.06418	0.0708846	-0.0708846	-0.691068	0.691068	1.13249	-1.13249	0.701343	1
1379	OG0005527	189.991	166.703	180.949	128.857	40.083	85.9134	125.599	118.19	245.573	228.865	0.872815	-0.872815	-1.88813	1.88813	0.157767	-0.157767	0.182803	-0.182803	0.703109	1
364	OG0003156	131.506	112.494	117.649	133.584	220.235	198.998	74.3276	73.3899	139.754	145.575	-1.17483	1.17483	0.938277	-0.938277	0.117571	-0.117571	-0.377881	0.377881	0.705456	1
855	OG0004327	89.3001	93.3847	133.375	132.731	43.569	67.6801	110.118	83.0717	61.9155	62.8378	0.0198125	-0.0198125	-1.77443	1.77443	1.14623	-1.14623	-0.0605293	0.0605293	0.708186	1
441	OG0003313	459.647	528.872	327.226	249.179	59.8149	50.4143	143.4	273.342	536.102	557.897	0.802436	-0.802436	0.505407	-0.505407	-1.84783	1.84783	-0.118067	0.118067	0.708355	1
153	OG0002531	725.822	652.177	1020.14	1300.98	291.113	242.581	510.162	446.286	757.458	733.948	-1.47031	1.47031	1.10504	-1.10504	0.811554	-0.811554	0.191557	-0.191557	0.708776	1
382	OG0003200	147.204	191.113	299.413	253.641	118.55	143.347	256.813	242.21	159.543	180.864	0.907373	-0.907373	-1.03805	1.03805	0.32082	-0.32082	-0.686712	0.686712	0.708985	1
619	OG0003777	157.394	159.405	61.2357	104.984	103.403	102.024	347.635	282.589	126.404	111.664	-1.92819	1.92819	0.049178	-0.049178	0.75613	-0.75613	0.453605	-0.453605	0.70902	1
1021	OG0004697	657.911	639.335	1802.61	1619.57	299.272	269.539	32.4769	39.1732	921.494	1025.83	0.860053	-0.860053	0.840567	-0.840567	-1.50282	1.50282	-0.861553	0.861553	0.709753	1
729	OG0004053	452.209	514.919	125.582	197.145	662.37	600.228	572.654	445.348	264.066	282.854	-1.74558	1.74558	0.387445	-0.387445	0.98445	-0.98445	-0.270432	0.270432	0.711467	1
630	OG0003808	518.674	580.073	594.154	780.232	1050.85	1264.38	1286.66	701.424	1119.43	1035.29	-0.835594	0.835594	-0.56922	0.56922	1.8168	-1.8168	0.241007	-0.241007	0.712235	1
877	OG0004382	68.9119	89.9077	191.778	198.378	160.809	194.589	179.807	165.505	65.1319	51.227	-0.17347	0.17347	-0.974684	0.974684	0.424713	-0.424713	1.22544	-1.22544	0.716079	1
338	OG0003102	147.814	156.365	109.191	90.2525	60.1221	59.3052	162.48	163.709	102.442	139.492	1.10352	-1.10352	0.0794939	-0.0794939	-0.0437912	0.0437912	-1.77969	1.77969	0.717959	1
98	OG0002110	552.321	580.507	1271.21	1212.63	460.151	401.29	645.845	871.26	979.716	967.602	0.299178	-0.299178	0.866858	-0.866858	-1.88499	1.88499	0.0789171	-0.0789171	0.718364	1
718	OG0004035	243.838	228.443	262.34	248.413	115.911	84.6791	60.7403	77.0395	187.837	189.614	0.288965	-0.288965	1.6501	-1.6501	-1.25372	1.25372	-0.0498766	0.0498766	0.719703	1
238	OG0002895	312.143	247.795	340.719	371.377	188.63	140.494	75.6044	87.9635	223.541	212.83	-0.441654	0.441654	1.50033	-1.50033	-0.775109	0.775109	0.251798	-0.251798	0.719747	1
890	OG0004418	678.424	732.531	406.39	449.075	1483.79	1049	903.477	1347.67	1257.93	1271.28	-0.393404	0.393404	1.35345	-1.35345	-1.55572	1.55572	-0.0416115	0.0416115	0.719788	1
1484	OG0006305	583.305	557.485	774.588	794.708	205.334	353.771	423.715	297.871	348.335	342.74	-0.0853081	0.0853081	-1.76651	1.76651	1.16042	-1.16042	0.0538716	-0.0538716	0.721778	1
416	OG0003266	491.558	425.007	620.018	633.14	88.5065	97.054	252.524	204.177	462.998	476.341	-0.161515	0.161515	-0.710541	0.710541	1.63296	-1.63296	-0.219115	0.219115	0.722278	1
622	OG0003783	276.873	228.035	141.071	211.714	234.577	330.808	812.539	808.633	73.1729	43.1191	-1.1147	1.1147	-0.947468	0.947468	0.0134119	-0.0134119	1.43862	-1.43862	0.725306	1
137	OG0002448	112.543	114.233	928.873	884.548	78.2507	67.9055	56.2901	94.1966	107.588	92.5034	0.189591	-0.189591	0.549019	-0.549019	-1.9538	1.9538	0.584759	-0.584759	0.72536	1
52	OG0001710	243.21	247.274	384.361	342.826	271.975	405.406	581.614	302.424	195.56	221.677	0.317335	-0.317335	-1.09438	1.09438	1.75458	-1.75458	-0.347762	0.347762	0.725675	1
377	OG0003187	908.29	929.067	143.057	170.131	200.385	163.515	293.286	313.771	1099.53	1149.47	-1.31327	1.31327	1.53921	-1.53921	-0.512645	0.512645	-0.337395	0.337395	0.72727	1
779	OG0004158	1075.68	847.844	717.253	881.482	1324.95	1185.54	201.727	191.241	842.212	867.911	-1.28846	1.28846	0.6965	-0.6965	0.334687	-0.334687	-0.188488	0.188488	0.727971	1
86	OG0002027	565.975	463.668	176.642	216.039	509.268	477.365	478.3	409.995	576.54	542.49	-1.27594	1.27594	0.411225	-0.411225	0.97792	-0.97792	0.386967	-0.386967	0.728726	1
1079	OG0004837	95.2126	110.761	93.5401	83.2793	274.651	290.973	157.224	159.708	92.4696	92.872	1.2332	-1.2332	-0.613221	0.613221	-0.166603	0.166603	-0.0461318	0.0461318	0.728868	1
447	OG0003335	253.427	263.217	83.5518	133.961	270.928	204.43	172.184	188.092	227.079	203.801	-1.75461	1.75461	1.05911	-1.05911	-0.334293	0.334293	0.409027	-0.409027	0.728944	1
593	OG0003722	261.784	238.891	211.633	215.163	293.001	370.25	191.595	184.472	286.74	251.16	-0.122689	0.122689	-1.72737	1.72737	0.28089	-0.28089	0.98101	-0.98101	0.729562	1
1141	OG0004993	214.685	221.515	315.973	309.569	219.237	211.217	343.186	369.382	230.388	220.6	0.432652	-0.432652	0.787348	-0.787348	-1.55362	1.55362	0.917226	-0.917226	0.732304	1
1085	OG0004850	123.554	88.1703	130.957	198.024	58.8701	47.5602	100.224	94.4647	86.0593	64.0448	-1.34639	1.34639	0.701828	-0.701828	0.19537	-0.19537	0.968622	-0.968622	0.734851	1
345	OG0003121	352.358	405.945	625.565	591.589	235.883	217.556	196.329	257.391	839.103	798.726	0.366345	-0.366345	0.530432	-0.530432	-1.76624	1.76624	0.32354	-0.32354	0.735374	1
1083	OG0004843	140.678	125.526	239.505	235.213	295.293	351.025	668.333	528.152	374.227	372.962	0.12256	-0.12256	-1.16896	1.16896	1.58828	-1.58828	0.0229518	-0.0229518	0.735649	1
836	OG0004283	82.3661	92.9503	140.206	237.709	728.296	707.523	654.509	574.864	73.8146	60.6229	-1.88564	1.88564	0.105738	-0.105738	0.473492	-0.473492	0.717153	-0.717153	0.737318	1
242	OG0002904	312.143	311.644	191.587	235.372	220.363	320.871	318.709	383.823	409.125	230.89	-0.600713	0.600713	-1.08778	1.08778	-0.542919	0.542919	1.63129	-1.63129	0.738296	1
210	OG0002818	122.329	105.546	148.058	236.446	336.742	296.72	416.85	368.208	191.213	178.005	-1.87864	1.87864	0.516329	-0.516329	0.506352	-0.506352	0.292354	-0.292354	0.74355	1
736	OG0004071	451.518	485.279	332.792	263.252	93.1561	105.153	223.409	325.952	577.503	507.112	1.03101	-1.03101	-0.534607	0.534607	-1.64951	1.64951	0.573515	-0.573515	0.744198	1
725	OG0004047	461.59	440.209	767.314	729.129	1239.08	1145.66	688.122	747.039	491.947	498.267	0.809273	-0.809273	1.24237	-1.24237	-1.302	1.302	-0.202432	0.202432	0.744629	1
1224	OG0005171	647.532	622.641	1043.81	1098.71	627.225	638.25	642.437	602.243	562.547	546.911	-1.11932	1.11932	-0.380605	0.380605	1.41077	-1.41077	0.615694	-0.615694	0.748771	1
1040	OG0004750	171.544	144.399	428.978	359.923	131.78	311.192	239.268	72.7549	47.6042	50.8603	0.272312	-0.272312	-1.26	1.26	1.66019	-1.66019	-0.102876	0.102876	0.74932	1
1411	OG0005607	315.812	203.275	156.437	143.806	53.3524	102.9	219.527	259.803	51.2998	30.9555	0.191343	-0.191343	-1.44216	1.44216	-0.382154	0.382154	1.12486	-1.12486	0.749459	1
1584	OG0007623	86.6496	77.0988	117.19	133.688	87.2219	66.068	270.846	303.936	95.6876	90.1061	-0.792487	0.792487	1.663	-1.663	-0.693763	0.693763	0.362026	-0.362026	0.750669	1
1136	OG0004986	268.512	238.022	122.874	54.5233	103.698	108.647	160.835	243.593	102.281	110.746	1.84584	-1.84584	-0.111639	0.111639	-0.980324	0.980324	-0.190363	0.190363	0.751624	1
1145	OG0005000	370.862	290.359	103.232	169.758	79.9658	44.9864	185.487	180.887	421.264	379.957	-1.3114	1.3114	1.50646	-1.50646	0.0675646	-0.0675646	0.277433	-0.277433	0.752039	1
261	OG0002945	1001.88	920.376	889.841	689.646	135.752	137.908	835.169	921.927	923.046	984.419	1.83806	-1.83806	-0.114237	0.114237	-0.716041	0.716041	-0.466596	0.466596	0.753041	1
44	OG0001587	260.151	253.227	169.243	176.705	126.132	128.711	221.563	208.399	234.049	228.588	-1.07076	1.07076	-0.502458	0.502458	1.51971	-1.51971	0.585872	-0.585872	0.754926	1
315	OG0003055	331.715	305.346	392.294	394.169	237.528	228.666	469.116	493.334	459.141	442.798	-0.0916812	0.0916812	0.731202	-0.731202	-0.967832	0.967832	0.696931	-0.696931	0.756326	1
1243	OG0005204	187.571	255.833	257.992	159.709	34.6956	50.8158	65.7586	82.7359	164.087	169.851	1.39529	-1.39529	-1.11788	1.11788	-0.677964	0.677964	-0.102342	0.102342	0.756598	1
833	OG0004280	914.205	882.377	2357.55	2350.12	841.568	802.254	793.316	971.354	1269.67	1158.69	0.029183	-0.029183	0.442318	-0.442318	-1.86594	1.86594	0.845229	-0.845229	0.75713	1
2	OG0000680	1769.7	1406.64	1260.79	1899.53	416.584	351.176	210.315	165.421	1599.19	1404.51	-1.51918	1.51918	0.64036	-0.64036	0.898091	-0.898091	0.487185	-0.487185	0.757969	1
1045	OG0004769	413.472	369.634	295.628	281.852	95.4484	107.504	497.332	459.188	304.756	295.386	0.531504	-0.531504	-1.32347	1.32347	0.888481	-0.888481	0.347851	-0.347851	0.759924	1
483	OG0003429	96.0261	95.7714	111.758	159.485	170.348	161.214	186.34	134.71	77.515	70.0225	-1.52176	1.52176	0.238256	-0.238256	1.39084	-1.39084	0.439209	-0.439209	0.761112	1
1386	OG0005537	538.857	582.012	262.33	259.215	774.981	746.345	313.974	343.242	224.665	221.494	0.202705	-0.202705	0.638887	-0.638887	-1.51155	1.51155	0.241217	-0.241217	0.762086	1
1279	OG0005292	628.204	674.181	568.493	483.02	490.586	541.036	411.784	459.254	958.483	861.831	1.36174	-1.36174	-0.819262	0.819262	-0.912974	0.912974	0.889488	-0.889488	0.763736	1
1005	OG0004660	640.188	591.366	439.953	573.152	793.796	718.844	595.995	549.598	661.29	655.755	-1.8402	1.8402	0.693531	-0.693531	0.566869	-0.566869	0.0588174	-0.0588174	0.764012	1
48	OG0001649	628.978	625.458	1222.81	1222.95	131.705	87.172	74.6112	95.537	747.491	777.985	-0.000507312	0.000507312	1.80892	-1.80892	-1.09343	1.09343	-0.177725	0.177725	0.765071	1
139	OG0002464	984.34	959.476	668.448	956.918	623.418	570.609	534.258	448.594	1406.37	1420.53	-1.85393	1.85393	0.461993	-0.461993	0.910447	-0.910447	-0.0523553	0.0523553	0.766096	1
559	OG0003638	1435.21	1426.39	402.295	289.204	1075.61	1082.45	567.162	964.787	719.667	688.43	1.1278	-1.1278	-0.0218371	0.0218371	-1.7899	1.7899	0.152982	-0.152982	0.767779	1
394	OG0003227	227.53	198.718	508.247	506.837	327.924	416.193	570.523	395.786	920.64	938.366	0.0129967	-0.0129967	-1.10957	1.10957	1.69145	-1.69145	-0.0891896	0.0891896	0.768299	1
1011	OG0004668	586.883	583.448	673.511	838.549	1109.42	469.456	211.477	164.4	50.819	208.778	-0.308813	0.308813	1.14681	-1.14681	0.354357	-0.354357	-1.72158	1.72158	0.768527	1
265	OG0002954	396.959	362.897	134.121	144.49	575.971	486.827	48.0999	56.6654	286.098	248.58	-0.531806	0.531806	1.19856	-1.19856	-1.1683	1.1683	1.00269	-1.00269	0.770045	1
1048	OG0004776	289.308	240.628	88.5553	90.2038	209.719	228.224	278.184	251.36	176.316	182.088	-0.170697	0.170697	-0.782154	0.782154	0.937641	-0.937641	-0.298095	0.298095	0.770781	1
910	OG0004457	216.114	327.932	219.734	147.576	63.194	56.5767	147.945	278.47	128.977	138.571	0.985352	-0.985352	0.277118	-0.277118	-1.53532	1.53532	-0.179853	0.179853	0.773349	1
822	OG0004257	555.071	560.05	398.397	389.389	1076.49	756.093	381.864	522.086	549.212	521.076	0.102989	-0.102989	1.57469	-1.57469	-1.39716	1.39716	0.23677	-0.23677	0.773605	1
94	OG0002091	168.202	279.503	189.188	94.8861	554.092	611.384	180.517	243.618	593.278	647.784	1.58065	-1.58065	-0.234066	0.234066	-0.708401	0.708401	-0.209121	0.209121	0.773748	1
623	OG0003784	152.299	173.739	268.955	265.708	171.649	210.566	94.637	86.3543	162.267	137.099	0.0833313	-0.0833313	-1.39742	1.39742	0.628069	-0.628069	1.15384	-1.15384	0.773794	1
1600	OG0008171	49.7491	37.571	93.8681	90.7554	295.158	458.484	185.346	115.576	56.7709	51.7798	0.102154	-0.102154	-1.31311	1.31311	1.40485	-1.40485	0.278596	-0.278596	0.774575	1
730	OG0004055	465.457	454.977	1267.76	1214.79	469.087	402.618	188.706	235.676	524.268	545.623	0.327934	-0.327934	1.17203	-1.17203	-1.70119	1.70119	-0.306786	0.306786	0.77688	1
1533	OG0006639	200.827	199.148	155.682	300.623	196.663	173.587	276.877	194.776	127.53	129.173	-1.83295	1.83295	0.359655	-0.359655	1.00448	-1.00448	-0.0369384	0.0369384	0.77858	1
1159	OG0005031	518.638	609.316	462.941	418.515	267.39	258.005	332.202	345.052	257.47	296.678	0.882175	-0.882175	0.312688	-0.312688	-0.332118	0.332118	-1.23842	1.23842	0.7802	1
682	OG0003947	83.9992	55.3771	133.278	112.856	119.937	167.103	49.4743	42.6247	62.5604	67.8113	0.610158	-0.610158	-1.20839	1.20839	0.54692	-0.54692	-0.296187	0.296187	0.783295	1
161	OG0002603	546.806	576.166	237.59	233.461	295.775	349.597	203.053	171.705	379.695	365.589	0.151482	-0.151482	-1.44108	1.44108	1.44543	-1.44543	0.327044	-0.327044	0.783553	1
1335	OG0005425	690.952	554.879	417.253	495.318	367.907	348.624	328.698	316.134	581.364	561.466	-1.26267	1.26267	0.397236	-0.397236	0.28759	-0.28759	0.256995	-0.256995	0.783794	1
1242	OG0005203	111.319	118.575	123.783	115.893	296.41	239.344	91.7491	138.028	114.664	89.9236	0.266589	-0.266589	0.8626	-0.8626	-1.63108	1.63108	0.979335	-0.979335	0.789265	1
545	OG0003606	94.9415	92.1294	111.068	129.622	48.6678	59.9105	218.958	154.917	99.0648	87.8967	-0.732793	0.732793	-0.984294	0.984294	1.62829	-1.62829	0.567842	-0.567842	0.789615	1
414	OG0003262	585.751	446.509	832.297	747.654	359.173	451.683	545.479	385.667	434.053	490.895	0.438024	-0.438024	-0.93281	0.93281	1.40327	-1.40327	-0.502452	0.502452	0.791684	1
160	OG0002597	201.845	205.227	105.546	101.304	93.6448	93.6254	220.237	220.865	125.439	132.308	1.25487	-1.25487	0.00634329	-0.00634329	-0.0870619	0.0870619	-1.63069	1.63069	0.793871	1
1104	OG0004909	169.456	154.543	337.027	281.371	410.85	419.986	173.508	245.293	569.624	517.247	0.931125	-0.931125	-0.113761	0.113761	-1.77334	1.77334	0.498574	-0.498574	0.794249	1
525	OG0003560	94.8069	82.5238	69.5	88.8669	155.049	157.277	416.802	347.804	177.223	175.242	-1.55091	1.55091	-0.0904787	0.0904787	1.14444	-1.14444	0.0712688	-0.0712688	0.794986	1
1266	OG0005268	177.377	228.686	230.941	78.2335	567.913	515.392	274.586	583.543	438.876	482.969	1.66883	-1.66883	0.163807	-0.163807	-1.21647	1.21647	-0.161608	0.161608	0.796545	1
1424	OG0005635	628.157	575.293	801.08	728.078	646.377	599.191	301.145	330.24	705.517	737.543	1.1143	-1.1143	0.884239	-0.884239	-1.07558	1.07558	-0.51802	0.51802	0.797187	1
1286	OG0005313	111.525	138.34	136.723	133.023	198.248	227.999	245.837	272.637	80.7314	68.5483	0.180777	-0.180777	-0.919855	0.919855	-0.681218	0.681218	1.07557	-1.07557	0.797203	1
186	OG0002772	408.583	368.548	138.987	231.229	429.97	375.901	477.875	387.645	495.649	478.366	-1.86381	1.86381	0.501906	-0.501906	0.77985	-0.77985	0.132734	-0.132734	0.799621	1
1593	OG0007962	758.645	717.978	106.239	122.419	170.215	169.93	671.601	581.432	96.1701	100.982	-1.39726	1.39726	0.0165634	-0.0165634	1.42104	-1.42104	-0.481943	0.481943	0.799642	1
831	OG0004278	106.426	106.413	121.734	130.099	139.706	168.049	676.003	536.731	65.6144	60.0719	-0.448183	0.448183	-1.24262	1.24262	1.54952	-1.54952	0.594993	-0.594993	0.801011	1
1465	OG0006097	111.727	89.4756	373.383	367.655	131.84	210.061	247.839	134.878	88.1629	87.1799	0.0420841	-0.0420841	-1.24572	1.24572	1.60712	-1.60712	0.0305259	-0.0305259	0.801476	1
757	OG0004109	178.396	186.989	101.973	99.4711	35.2681	57.4646	127.872	81.9658	124.474	106.325	0.0787111	-0.0787111	-1.51692	1.51692	1.38643	-1.38643	0.498339	-0.498339	0.803623	1
796	OG0004201	372.695	386.133	974.571	1028.57	1581.05	1509.11	765.811	1317.11	613.686	410.184	-0.171537	0.171537	0.148131	-0.148131	-1.68417	1.68417	1.26472	-1.26472	0.805429	1
1330	OG0005412	490.539	547.278	470.246	510.971	884.124	633.418	314.827	440.826	847.68	698.567	-0.334919	0.334919	1.33312	-1.33312	-1.34551	1.34551	0.778184	-0.778184	0.806717	1
1144	OG0004998	266.475	265.169	242.11	276.734	511.453	492.109	322.022	287.717	371.001	363.758	-1.57356	1.57356	0.454519	-0.454519	1.32662	-1.32662	0.232449	-0.232449	0.806852	1
875	OG0004377	311.935	336.185	632.124	773.181	72.3187	157.657	233.824	135.85	228.201	183.533	-0.442845	0.442845	-1.63716	1.63716	1.16929	-1.16929	0.478645	-0.478645	0.809798	1
639	OG0003838	749.67	885.632	1080.37	510.088	569.823	749.251	76.5172	103.714	399.635	390.099	1.80846	-1.80846	-0.686063	0.686063	-0.761085	0.761085	0.0609004	-0.0609004	0.810956	1
977	OG0004599	875.261	464.754	709.779	825.576	386.543	356.315	145.435	146.572	309.899	274.932	-0.494256	0.494256	0.266665	-0.266665	-0.0255313	0.0255313	0.391823	-0.391823	0.811535	1
518	OG0003534	86.2439	83.1797	256.668	344.627	160.253	167.727	201.49	174.419	87.8605	77.6715	-1.75624	1.75624	-0.273608	0.273608	0.86458	-0.86458	0.738992	-0.738992	0.8119	1
319	OG0003059	249.959	204.358	90.3262	219.693	97.864	118.14	176.399	90.2425	112.734	96.1907	-1.6063	1.6063	-0.361332	0.361332	1.2438	-1.2438	0.304816	-0.304816	0.812934	1
1493	OG0006354	129.261	154.408	185.893	188.812	258.975	300.05	356.962	329.202	177.866	157.182	-0.120607	0.120607	-1.13779	1.13779	0.626486	-0.626486	0.955983	-0.955983	0.81339	1
1179	OG0005077	89.7078	87.3038	107.836	106.873	77.7666	74.886	152.49	170.231	108.503	98.857	0.125496	-0.125496	0.528058	-0.528058	-1.53829	1.53829	1.30178	-1.30178	0.813906	1
974	OG0004594	270.956	267.124	80.113	123.272	147.421	129.162	174.409	131.125	62.7196	55.8337	-1.66743	1.66743	0.51874	-0.51874	1.11317	-1.11317	0.456394	-0.456394	0.815151	1
1116	OG0004939	624.177	516.934	197.484	211.097	499.587	408.865	394.741	460.897	479.403	444.827	-0.427829	0.427829	1.2823	-1.2823	-0.992798	0.992798	0.480366	-0.480366	0.817374	1
837	OG0004284	267.9	263.864	188.782	172.282	458.806	444.346	317.668	354.551	303.788	299.256	1.31081	-1.31081	0.459265	-0.459265	-1.57384	1.57384	0.215574	-0.215574	0.818198	1
281	OG0002982	96.8437	71.0158	174.418	169.985	40.7415	74.3567	173.51	107.801	69.6349	54.5438	0.0646368	-0.0646368	-1.46655	1.46655	1.17291	-1.17291	0.610239	-0.610239	0.820208	1
397	OG0003233	342.806	343.334	387.241	376.072	823.984	853.232	469.637	514.245	323.086	300.542	0.498208	-0.498208	-0.59379	0.59379	-1.5438	1.5438	1.23093	-1.23093	0.820586	1
1454	OG0005947	121.513	130.302	159.586	193.88	49.6546	53.3739	75.7483	62.2278	99.5473	98.0315	-1.40054	1.40054	-0.521106	0.521106	1.41452	-1.41452	0.110742	-0.110742	0.820772	1
672	OG0003917	210.612	288.772	197.584	215.903	721.188	682.676	323.35	333.09	303.629	291.33	-0.563074	0.563074	0.348661	-0.348661	-0.18857	0.18857	0.262714	-0.262714	0.822649	1
1109	OG0004920	396.918	407.207	606.01	626.559	465.487	442.021	255.79	283.361	702.059	661.978	-0.522082	0.522082	0.809746	-0.809746	-1.6014	1.6014	0.920181	-0.920181	0.823936	1
1124	OG0004956	448.539	512.096	389.243	376.864	1853.58	754.565	217.111	396.457	387.252	426.216	0.0659729	-0.0659729	1.72049	-1.72049	-1.19346	1.19346	-0.195571	0.195571	0.823968	1
627	OG0003796	580.656	495.156	412.321	508.19	87.1195	98.5646	1093.42	894.417	400.762	373.148	-1.2301	1.2301	-0.72801	0.72801	1.18242	-1.18242	0.421435	-0.421435	0.826425	1
102	OG0002172	89.0982	99.4677	200.823	227.974	45.1562	57.254	121.716	82.0995	156.477	175.793	-0.538794	0.538794	-1.0052	1.0052	1.65397	-1.65397	-0.494664	0.494664	0.826701	1
981	OG0004603	312.958	327.934	114.394	72.4901	52.9335	52.461	25.4229	41.3808	122.06	135.07	1.43112	-1.43112	0.0286162	-0.0286162	-1.52464	1.52464	-0.322919	0.322919	0.829139	1
1352	OG0005469	124.368	111.844	215.765	282.056	96.5398	107.802	254.607	179.178	107.912	96.3731	-1.18311	1.18311	-0.489674	0.489674	1.54492	-1.54492	0.501825	-0.501825	0.831421	1
1499	OG0006411	362.499	383.963	243.647	221.169	277.772	306.176	309.632	294.66	144.739	156.631	1.16886	-1.16886	-1.17574	1.17574	0.598855	-0.598855	-0.953797	0.953797	0.831672	1
1171	OG0005051	333.218	376.516	197.899	164.469	1939.04	1261.02	134.926	225.02	364.88	462.701	0.535131	-0.535131	1.229	-1.229	-1.45185	1.45185	-0.685629	0.685629	0.833544	1
1229	OG0005179	132.321	127.481	308.137	307.577	101.462	105.107	109.549	128.31	101.154	79.236	0.0131129	-0.0131129	-0.254458	0.254458	-1.1373	1.1373	1.75199	-1.75199	0.834535	1
95	OG0002093	458.862	441.162	323.503	358.041	561.818	481.851	183.641	194.958	535.183	549.122	-1.08126	1.08126	1.63486	-1.63486	-0.637828	0.637828	-0.274288	0.274288	0.839161	1
1227	OG0005174	318.667	293.399	133.821	204.153	176.166	155.446	334.854	235.408	105.176	101.348	-1.56399	1.56399	0.469587	-0.469587	1.31064	-1.31064	0.13929	-0.13929	0.841929	1
1502	OG0006437	147.612	121.398	163.024	138.098	31.0815	56.2445	273.542	166.511	234.639	222.782	0.440091	-0.440091	-1.53194	1.53194	1.29309	-1.29309	0.137807	-0.137807	0.846178	1
901	OG0004442	331.511	287.104	289.016	258.784	58.9353	73.0003	454.678	443.672	307.649	272.166	0.764361	-0.764361	-1.4765	1.4765	0.169678	-0.169678	0.847586	-0.847586	0.84802	1
458	OG0003366	547.424	557.485	520.3	387.929	407.346	426.441	524.128	636.18	925.198	920.984	1.75091	-1.75091	-0.275128	0.275128	-1.16014	1.16014	0.0274211	-0.0274211	0.848847	1
936	OG0004511	245.273	296.661	328.185	266.38	228.888	276.107	172.148	182.539	380.983	384.014	1.28574	-1.28574	-1.15655	1.15655	-0.362354	0.362354	-0.0490135	0.0490135	0.850974	1
336	OG0003099	204.085	198.282	255.193	213.732	13709.5	20049.1	507.131	501.238	219.036	194.589	0.866832	-0.866832	-1.84107	1.84107	0.0572932	-0.0572932	0.579458	-0.579458	0.851149	1
540	OG0003592	1012.89	1240.72	271.072	207.745	532.456	435.519	752.691	1102.17	2018.61	2035.08	1.03657	-1.03657	0.784883	-0.784883	-1.4767	1.4767	-0.031841	0.031841	0.85155	1
596	OG0003730	384.109	376.796	174.062	258.881	335.229	297.384	424.662	316.736	233.51	219.648	-1.64048	1.64048	0.500932	-0.500932	1.21894	-1.21894	0.256149	-0.256149	0.85222	1
1432	OG0005645	562.509	651.304	1056.95	1089.04	516.443	574.099	898.373	786.624	892.064	865.15	-0.278216	0.278216	-0.98352	0.98352	1.23374	-1.23374	0.284929	-0.284929	0.852588	1
1158	OG0005030	338.035	334.882	211.258	175.534	244.489	310.793	566.168	563.269	578.465	577.498	1.29704	-1.29704	-1.67687	1.67687	0.0360345	-0.0360345	0.0117462	-0.0117462	0.853782	1
1464	OG0006076	120.698	112.715	182.717	230.401	159.978	141.964	171.853	156.793	180.76	169.532	-1.68248	1.68248	0.869662	-0.869662	0.667967	-0.667967	0.467207	-0.467207	0.854027	1
303	OG0003028	148.831	127.913	303.614	419.92	405.663	371.269	132.266	116.009	87.4842	74.2607	-1.61676	1.61676	0.445251	-0.445251	0.65859	-0.65859	0.822276	-0.822276	0.854149	1
912	OG0004461	622.448	493.636	329.6	393.929	250.118	193.883	468.691	460.293	488.25	511.164	-0.969131	0.969131	1.38056	-1.38056	0.0985339	-0.0985339	-0.24992	0.24992	0.857816	1
1534	OG0006656	148.016	124.006	184.404	184.772	64.9789	89.1534	357.293	288.118	88.1275	84.3955	-0.0100516	0.0100516	-1.57994	1.57994	1.07967	-1.07967	0.217903	-0.217903	0.858211	1
542	OG0003598	441.605	173.524	7692.33	7392.08	550.838	227.751	355.211	899.743	1303.89	1569.09	0.0564586	-0.0564586	1.17703	-1.17703	-1.23076	1.23076	-0.261831	0.261831	0.859627	1
201	OG0002803	182.47	134.431	140.127	164.748	87.3824	128.799	240.405	130.689	120.777	113.51	-0.435718	0.435718	-1.03368	1.03368	1.5952	-1.5952	0.167352	-0.167352	0.860112	1
1328	OG0005407	747.837	777.482	939.561	825.284	183.294	161.229	176.966	239.563	558.525	563.679	0.776669	-0.776669	0.768199	-0.768199	-1.80258	1.80258	-0.0550958	0.0550958	0.861426	1
496	OG0003460	725.003	731.793	210.583	174.333	310.04	221.668	347.293	580.705	856.364	957.466	0.62283	-0.62283	1.09919	-1.09919	-1.66344	1.66344	-0.36863	0.36863	0.863451	1
685	OG0003958	271.57	216.954	98.7248	159.456	77.2291	48.0931	147.376	178.374	259.403	235.867	-1.36725	1.36725	1.35134	-1.35134	-0.553105	0.553105	0.276223	-0.276223	0.864543	1
1194	OG0005112	433.044	524.038	505.418	485.765	948.01	818	677.659	868.077	545.019	491.075	0.232462	-0.232462	0.8631	-0.8631	-1.44428	1.44428	0.610412	-0.610412	0.864544	1
748	OG0004096	76.2496	49.0791	9.38243	133.039	63.066	18.755	73.4754	61.2228	91.0238	76.2877	-1.74805	1.74805	1.09033	-1.09033	0.183139	-0.183139	0.177325	-0.177325	0.866216	1
286	OG0002993	1062.02	984.883	783.614	653.271	975.116	1046.52	899.624	1037.1	959.314	962.308	1.52427	-1.52427	-0.593459	0.593459	-1.19278	1.19278	-0.0261813	0.0261813	0.867019	1
879	OG0004387	208.161	185.681	181.995	234.071	375.168	426.183	336.511	247.571	173.519	171.002	-1.23504	1.23504	-0.628178	0.628178	1.50255	-1.50255	0.072093	-0.072093	0.86816	1
1217	OG0005157	720.109	931.021	1027.89	1058.15	518.328	469.205	1419.47	1472.33	1577.89	1606.88	-0.22084	0.22084	0.757228	-0.757228	-0.278271	0.278271	-0.138592	0.138592	0.86827	1
1096	OG0004886	638.765	665.203	204.065	278.418	69.1585	71.2062	929.71	648.139	594.871	567.921	-1.37222	1.37222	-0.129902	0.129902	1.58901	-1.58901	0.206378	-0.206378	0.87034	1
270	OG0002961	551.298	491.681	1199.04	1187.29	929.234	846.75	809.934	869.954	469.271	476.337	0.126808	-0.126808	1.19644	-1.19644	-0.920411	0.920411	-0.192496	0.192496	0.871268	1
503	OG0003479	500.937	449.984	260.918	279.723	65.6142	98.3568	195.762	140.91	155.03	144.283	-0.275378	0.275378	-1.58097	1.58097	1.28993	-1.28993	0.28427	-0.28427	0.873127	1
252	OG0002923	170.445	162.663	274.852	238.211	93.9939	131.794	315.3	306.113	162.749	130.647	0.707384	-0.707384	-1.65831	1.65831	0.146437	-0.146437	1.0838	-1.0838	0.876185	1
1564	OG0007054	107.853	127.477	152.767	145.902	81.8066	78.7925	181.747	195.732	92.7929	92.5034	0.508156	-0.508156	0.414867	-0.414867	-0.81897	0.81897	0.0345304	-0.0345304	0.876609	1
1252	OG0005231	808.798	896.493	146.821	175.281	153.592	179.008	120.911	103.345	158.407	138.753	-1.14491	1.14491	-0.990156	0.990156	1.01502	-1.01502	0.857015	-0.857015	0.877904	1
68	OG0001943	133.744	139.643	113.81	127.896	359.022	274.098	432.711	525.873	211.801	193.668	-0.677448	0.677448	1.55931	-1.55931	-1.12979	1.12979	0.519888	-0.519888	0.879299	1
358	OG0003147	281.766	316.854	188.87	196.638	313.247	332.602	445.397	405.907	126.887	124.014	-0.510098	0.510098	-0.758607	0.758607	1.17423	-1.17423	0.289864	-0.289864	0.879513	1
205	OG0002812	1204.12	1997.56	222.62	131.537	182.694	191.753	1644.96	2118.23	2065.73	2788.37	1.33855	-1.33855	-0.125921	0.125921	-0.654557	0.654557	-0.774829	0.774829	0.879675	1
1468	OG0006122	153.523	156.584	86.9936	106.191	384.425	339.087	201.678	185.143	159.856	167.135	-1.65511	1.65511	1.0437	-1.0437	0.711934	-0.711934	-0.370721	0.370721	0.880554	1
753	OG0004105	521.123	393.736	1092.38	1088.57	875.039	825.81	760.13	640.458	372.46	454.409	0.0191767	-0.0191767	0.317688	-0.317688	0.937837	-0.937837	-1.08782	1.08782	0.881226	1
721	OG0004040	777.808	838.512	1972.96	1596.44	1224.51	1484.33	670.652	615.203	779.169	902.92	1.3138	-1.3138	-1.1946	1.1946	0.537082	-0.537082	-0.916291	0.916291	0.882499	1
1591	OG0007912	567.608	680.62	448.698	435.512	61.807	64.5015	360.417	436.851	664.981	559.8	0.198344	-0.198344	-0.28372	0.28372	-1.27505	1.27505	1.14214	-1.14214	0.883129	1
28	OG0001435	248.529	304.039	237.284	269.067	145.035	167.936	1541.14	1421.99	167.738	142.991	-0.805202	0.805202	-0.938667	0.938667	0.515818	-0.515818	1.02165	-1.02165	0.885448	1
215	OG0002833	288.696	344.655	1124.71	705.069	342.092	336.492	101.313	147.578	582.488	602.009	1.57597	-1.57597	0.0567092	-0.0567092	-1.27737	1.27737	-0.11325	0.11325	0.888616	1
846	OG0004303	107.851	114.016	169.877	138.753	41.8819	59.7585	160.395	114.202	94.0794	106.322	0.786899	-0.786899	-1.37242	1.37242	1.31263	-1.31263	-0.476687	0.476687	0.889004	1
1253	OG0005233	110.706	129.87	733.847	666.338	245.729	225.363	221.752	262.418	635.723	629.283	0.770526	-0.770526	0.690909	-0.690909	-1.34225	1.34225	0.0813547	-0.0813547	0.889461	1
13	OG0001209	408.578	431.526	676.378	767.227	682.323	667.654	673.399	620.975	477.632	475.046	-1.65938	1.65938	0.286501	-0.286501	1.06794	-1.06794	0.0715961	-0.0715961	0.890613	1
1240	OG0005201	158.826	156.797	210.571	220.251	103.347	100.551	485.686	477.116	108.714	109.456	-1.65944	1.65944	1.01279	-1.01279	0.657336	-0.657336	-0.251252	0.251252	0.891164	1
1231	OG0005185	559.453	594.837	142.389	109.504	748.163	800.468	606.955	688.329	209.869	232.548	1.72755	-1.72755	-0.446947	0.446947	-0.831333	0.831333	-0.678338	0.678338	0.897071	1
249	OG0002917	347.21	370.064	335.778	345.525	160.129	183.539	799.187	716.313	519.767	501.398	-0.316866	0.316866	-1.50865	1.50865	1.21114	-1.21114	0.398402	-0.398402	0.898985	1
744	OG0004086	89.9117	114.668	139.643	142.008	125.52	207.398	248.927	165.204	72.8512	61.1776	-0.0506459	0.0506459	-1.48363	1.48363	1.21956	-1.21956	0.525421	-0.525421	0.901011	1
1554	OG0006884	194.095	202.838	51.7502	89.8209	58.1347	32.0983	91.7496	89.5049	119.167	117.38	-1.44306	1.44306	1.5484	-1.5484	0.0664565	-0.0664565	0.0405489	-0.0405489	0.906166	1
427	OG0003289	739.225	729.356	1699.84	1643.22	68.7117	67.5948	333.859	348.475	670.46	679.403	1.19628	-1.19628	0.5788	-0.5788	-1.51314	1.51314	-0.467966	0.467966	0.906732	1
595	OG0003725	274.427	229.12	303.264	262.642	235.802	253.818	316.673	340.462	233.51	228.863	1.20333	-1.20333	-0.616832	0.616832	-0.606844	0.606844	0.168475	-0.168475	0.907059	1
581	OG0003692	162.292	127.698	172.732	156.052	46.5781	113.36	170.621	109.811	72.6084	59.1266	0.215825	-0.215825	-1.77633	1.77633	0.922482	-0.922482	0.435372	-0.435372	0.90791	1
184	OG0002770	233.216	190.368	173.775	287.79	645.046	480.691	338.356	331.213	330.002	291.515	-1.68671	1.68671	0.99691	-0.99691	0.0728476	-0.0728476	0.422835	-0.422835	0.90941	1
55	OG0001731	4081.51	3924.55	6071.81	5852.83	1637.39	1639.32	1021.22	1089.51	3878	3736.62	0.847371	-0.847371	-0.0271753	0.0271753	-1.4929	1.4929	0.856765	-0.856765	0.910204	1
330	OG0003081	231.002	206.1	184.279	403.517	273.087	135.89	269.568	245.194	254.574	235.679	-1.55582	1.55582	1.39932	-1.39932	0.197514	-0.197514	0.160766	-0.160766	0.910398	1
1285	OG0005311	190.833	195.676	219.019	233.873	212.667	144.41	629.132	832.12	107.107	106.692	-0.291229	0.291229	1.69736	-1.69736	-1.23349	1.23349	0.0172449	-0.0172449	0.916077	1
1449	OG0005887	94.8069	101.42	381.691	468.554	596.886	568.872	247.458	198.412	82.9813	86.0558	-1.38228	1.38228	0.325135	-0.325135	1.48832	-1.48832	-0.246095	0.246095	0.916358	1
1215	OG0005152	330.494	322.588	201.438	190.827	388.547	346.656	213.326	242.58	375.676	397.47	0.603654	-0.603654	1.27148	-1.27148	-1.43188	1.43188	-0.629032	0.629032	0.917329	1
511	OG0003505	322.133	336.954	949.512	900.857	313.431	281.571	195.666	223.244	407.88	413.044	0.607243	-0.607243	1.23656	-1.23656	-1.52032	1.52032	-0.145275	0.145275	0.918874	1
1505	OG0006446	95.4165	97.0745	96.8102	117.581	134.247	135.371	302.805	301.692	115.465	96.7766	-1.56549	1.56549	-0.0673542	0.0673542	0.0297727	-0.0297727	1.42284	-1.42284	0.920273	1
972	OG0004592	426.514	329.7	850.953	769.635	148.549	130.582	920.147	1115.61	304.271	309.205	0.591949	-0.591949	0.759338	-0.759338	-1.1327	1.1327	-0.0948815	0.0948815	0.922236	1
131	OG0002398	121.717	128.35	108.857	43.7537	153.783	191.84	29.9678	64.8084	182.852	149.811	1.5524	-1.5524	-0.400695	0.400695	-1.33774	1.33774	0.361432	-0.361432	0.922494	1
1389	OG0005549	336.001	329.237	162.44	187.799	166.829	186.822	353.981	291.135	288.668	264.796	-1.089	1.089	-0.850262	0.850262	1.46523	-1.46523	0.648734	-0.648734	0.922682	1
314	OG0003053	264.434	301.437	451.085	422.86	639.044	723.193	856.803	799.884	460.909	459.569	0.674473	-0.674473	-1.29008	1.29008	0.717531	-0.717531	0.0304023	-0.0304023	0.923662	1
1020	OG0004692	78.9021	92.2988	73.6696	98.8513	159.315	149.169	129.671	114.102	61.4331	54.1753	-1.62003	1.62003	0.365037	-0.365037	0.708863	-0.708863	0.696772	-0.696772	0.927101	1
673	OG0003919	180.637	162.009	159.651	171.426	226.388	254.27	246.512	208.566	134.444	129.543	-0.618427	0.618427	-1.00868	1.00868	1.44992	-1.44992	0.322768	-0.322768	0.928201	1
1365	OG0005493	278.3	280.586	126.079	80.7872	717.563	778.723	137.056	183.802	297.243	330.396	1.71152	-1.71152	-0.319526	0.319526	-1.1389	1.1389	-0.41292	0.41292	0.929425	1
240	OG0002898	55.048	57.9875	194.814	181.91	39.6897	56.9013	366.43	354.302	85.1539	68.1172	0.337898	-0.337898	-1.75785	1.75785	0.165995	-0.165995	1.09654	-1.09654	0.92998	1
585	OG0003702	85.2225	112.496	98.172	155.01	558.346	548.241	940.742	789.462	147.793	109.456	-1.51078	1.51078	0.061453	-0.061453	0.588407	-0.588407	1.0029	-1.0029	0.930281	1
868	OG0004360	129.467	112.932	176.33	207.548	215.141	239.26	346.405	223.88	131.39	148.89	-0.681156	0.681156	-0.444591	0.444591	1.79956	-1.79956	-0.522991	0.522991	0.93085	1
1474	OG0006194	229.163	241.499	199.058	234.769	371.475	413.178	397.06	314.592	259.402	243.971	-1.11206	1.11206	-0.718016	0.718016	1.56553	-1.56553	0.414132	-0.414132	0.933006	1
1418	OG0005625	734.789	805.929	213.416	193.514	144.821	171.799	231.551	206.656	570.586	584.87	0.842518	-0.842518	-1.46778	1.46778	0.97866	-0.97866	-0.21296	0.21296	0.933106	1
519	OG0003539	895.651	750.987	117.259	153.407	898.108	864.85	696.313	597.483	792.999	750.162	-1.57113	1.57113	0.221925	-0.221925	0.89862	-0.89862	0.32656	-0.32656	0.937285	1
872	OG0004371	485.644	546.843	165.489	143.137	865.244	795.444	955.322	1153.18	676.569	693.221	1.10079	-1.10079	0.638841	-0.638841	-1.4263	1.4263	-0.18477	0.18477	0.937289	1
869	OG0004361	458.142	524.153	296.384	290.129	314.01	315.616	543.823	641.784	567.97	496.108	0.178705	-0.178705	-0.0427304	0.0427304	-1.38462	1.38462	1.13174	-1.13174	0.939077	1
1417	OG0005624	266.679	326.76	311.451	293.611	370.847	263.095	272.408	368.978	204.004	231.916	0.242032	-0.242032	1.39528	-1.39528	-1.23598	1.23598	-0.525617	0.525617	0.94034	1
1077	OG0004831	627.143	701.247	1002.85	1055.86	961.772	990.129	649.587	655.63	868.263	787.936	-0.684948	0.684948	-0.386435	0.386435	-0.123159	0.123159	1.29013	-1.29013	0.940923	1
1294	OG0005331	1434.71	1586.67	904.424	641.875	1156.89	1142.08	850.22	1168.62	1757.64	1877.79	1.50381	-1.50381	0.057032	-0.057032	-1.39685	1.39685	-0.292727	0.292727	0.941846	1
1142	OG0004994	56.8829	56.9017	190.207	186.579	853.822	811.917	182.599	233.833	54.1946	46.2517	0.137328	-0.137328	0.358864	-0.358864	-1.75499	1.75499	1.12799	-1.12799	0.942229	1
413	OG0003261	91.7446	107.497	169.449	190.119	62.5028	57.0533	303.933	295.885	66.2576	67.0723	-1.12024	1.12024	0.888239	-0.888239	0.261452	-0.261452	-0.119074	0.119074	0.94242	1
1007	OG0004664	592.592	545.996	328.613	197.904	98.2596	145.401	439.562	518.454	624.785	613.618	1.60546	-1.60546	-1.25118	1.25118	-0.532558	0.532558	0.0583156	-0.0583156	0.946595	1
654	OG0003881	198.99	230.426	149.263	118.567	464.268	467.413	442.698	581.198	367.952	357.481	1.26375	-1.26375	-0.0372229	0.0372229	-1.49153	1.49153	0.159148	-0.159148	0.949438	1
1059	OG0004799	145.904	172.777	299.151	296.135	8727.47	4770.93	104.19	183.52	190.249	207.672	0.0259868	-0.0259868	1.50366	-1.50366	-1.41448	1.41448	-0.22461	0.22461	0.950618	1
395	OG0003228	150.055	128.135	185.097	232.663	150.8	147.488	464.617	393.574	169.343	160.315	-1.47268	1.47268	0.143626	-0.143626	1.07072	-1.07072	0.354226	-0.354226	0.951702	1
297	OG0003017	184.311	141.597	66.9139	89.1784	280.76	335.495	216.023	160.178	161.945	133.78	-1.09385	1.09385	-0.681131	0.681131	1.13839	-1.13839	0.730385	-0.730385	0.952947	1
1321	OG0005395	264.434	279.503	621.511	410.26	196.873	191.148	229.801	358.021	322.138	313.66	1.44247	-1.44247	0.103946	-0.103946	-1.53674	1.53674	0.0939351	-0.0939351	0.954036	1
1472	OG0006173	96.2321	89.9099	88.6334	98.0531	893.289	824.275	361.507	382.215	89.4157	83.4742	-1.25532	1.25532	0.999666	-0.999666	-0.692709	0.692709	0.854975	-0.854975	0.955021	1
561	OG0003641	303.58	330.102	523.886	495.62	505.84	478.079	395.431	427.784	933.464	970.296	0.812851	-0.812851	0.827193	-0.827193	-1.1522	1.1522	-0.567215	0.567215	0.957011	1
549	OG0003616	122.737	96.4251	247.088	265.001	102.607	104.309	1031.45	1170.81	108.071	88.2652	-0.429235	0.429235	-0.10093	0.10093	-0.7765	0.7765	1.23785	-1.23785	0.957748	1
433	OG0003304	431.542	467.184	338.021	330.226	115.434	181.394	244.996	167.651	240.906	224.07	0.0836341	-0.0836341	-1.59329	1.59329	1.34393	-1.34393	0.259613	-0.259613	0.958143	1
1457	OG0005984	3215.41	4914.86	352.175	304.267	94.8736	97.759	135.305	115.81	2265.78	2933.57	0.577913	-0.577913	-0.118613	0.118613	0.61473	-0.61473	-1.01703	1.01703	0.959737	1
637	OG0003831	121.515	119.446	95.336	57.5638	37.4137	69.0182	231.126	225.957	135.248	121.067	1.3421	-1.3421	-1.61322	1.61322	0.0614347	-0.0614347	0.300564	-0.300564	0.959843	1
1291	OG0005319	237.677	321.662	129.97	144.214	133.22	126.721	569.766	466.626	158.89	185.746	-0.538727	0.538727	0.259301	-0.259301	1.03201	-1.03201	-0.808095	0.808095	0.963883	1
1528	OG0006614	490.482	496.704	305.288	326.326	361.175	429.868	498.991	403.36	398.512	391.391	-0.49957	0.49957	-1.30247	1.30247	1.58958	-1.58958	0.135226	-0.135226	0.965839	1
698	OG0003982	159.635	139.645	214.35	282.87	218.141	228.143	154.49	128.945	116.916	102.821	-1.53663	1.53663	-0.24992	0.24992	1.00498	-1.00498	0.715261	-0.715261	0.968705	1
1476	OG0006252	107.448	116.405	89.5485	108.167	75.8374	83.8364	375.85	257.19	142.969	153.681	-0.898613	0.898613	-0.478038	0.478038	1.78869	-1.78869	-0.344593	0.344593	0.969702	1
754	OG0004106	119.884	137.039	237.822	100.6	1109.87	1090.67	191.546	377.96	492.751	567	1.62264	-1.62264	0.0349125	-0.0349125	-1.3099	1.3099	-0.280378	0.280378	0.970035	1
1409	OG0005602	422.442	425.443	98.0002	148.666	253.928	210.444	301.407	249.71	494.84	484.816	-1.7807	1.7807	0.811782	-0.811782	0.813218	-0.813218	0.0887096	-0.0887096	0.970398	1
1208	OG0005141	255.8	320.548	230.241	192.086	516.627	551.637	563.289	564.596	395.619	446.112	1.20119	-1.20119	-0.435734	0.435734	-0.0154086	0.0154086	-0.797544	0.797544	0.970442	1
701	OG0003991	108.465	105.112	119.217	188.406	194.883	149	275.342	274.748	144.575	122.539	-1.73707	1.73707	1.03048	-1.03048	0.00833078	-0.00833078	0.637129	-0.637129	0.972944	1
1191	OG0005105	77.2731	88.6069	114.694	135.418	152.894	153.6	137.625	122.714	80.7314	75.9191	-1.39994	1.39994	-0.0388977	0.0388977	0.96775	-0.96775	0.519043	-0.519043	0.974744	1
89	OG0002045	51.5841	50.8165	726.611	759.271	127.891	124.776	131.282	121.173	96.3309	102.085	-0.832625	0.832625	0.466998	-0.466998	1.51691	-1.51691	-1.09863	1.09863	0.976521	1
621	OG0003782	148.426	117.491	173.16	338.16	295.314	202.091	390.905	318.363	120.775	110.93	-1.68493	1.68493	0.978595	-0.978595	0.534032	-0.534032	0.221856	-0.221856	0.977145	1
1063	OG0004805	83.9992	93.819	113.96	81.1409	35.5497	52.3975	581.128	551.24	192.823	196.432	1.36018	-1.36018	-1.54899	1.54899	0.21342	-0.21342	-0.0749675	0.0749675	0.977238	1
1558	OG0006953	63.8149	62.9825	96.6197	87.835	49.6359	50.8408	68.5523	67.1876	63.2005	69.4715	1.45968	-1.45968	-0.367532	0.367532	0.308149	-0.308149	-1.44873	1.44873	0.978503	1
858	OG0004334	238.339	245.406	289.6	303.878	60.157	52.3331	177.155	207.393	197.488	183.901	-0.446199	0.446199	1.28997	-1.28997	-1.45839	1.45839	0.660723	-0.660723	0.979459	1
571	OG0003659	267.06	258.521	123.196	192.433	571.883	477.802	661.127	564.453	348.978	311.786	-1.81398	1.81398	0.741159	-0.741159	0.652288	-0.652288	0.465451	-0.465451	0.980109	1
880	OG0004391	98.6786	101.201	88.4397	119.826	507.402	492.306	161.201	137.492	109.52	97.1102	-1.75967	1.75967	0.176311	-0.176311	0.926837	-0.926837	0.701246	-0.701246	0.980187	1
114	OG0002306	129.87	142.027	84.7199	147.391	64.0527	60.1586	103.775	66.0472	88.6099	86.9753	-1.61793	1.61793	0.187856	-0.187856	1.33122	-1.33122	0.0557847	-0.0557847	0.980814	1
1327	OG0005406	673.215	763.15	328.751	124.161	1057.49	1188.64	93.2646	217.145	699.267	707.948	1.57388	-1.57388	-0.203442	0.203442	-1.39049	1.39049	-0.0214922	0.0214922	0.981539	1
476	OG0003413	214.891	277.765	135.542	148.728	738.172	916.091	175.546	129.081	193.948	192.009	-0.426209	0.426209	-0.988261	0.988261	1.40156	-1.40156	0.046169	-0.046169	0.982364	1
15	OG0001247	2858.22	2676.67	3400.69	3369.84	181.407	132.961	79.1565	104.618	2406.42	2486.42	0.0459276	-0.0459276	1.55303	-1.55303	-1.39627	1.39627	-0.16477	0.16477	0.983035	1
276	OG0002969	238.951	234.765	256.34	292.3	187.262	230.183	868.829	695.131	77.9975	69.1012	-0.790484	0.790484	-1.24002	1.24002	1.33944	-1.33944	0.729387	-0.729387	0.983044	1
797	OG0004205	63.0014	45.8236	64.8337	95.6259	140.307	98.9035	40.9039	42.3231	72.3704	67.9955	-1.33515	1.33515	1.20423	-1.20423	-0.118649	0.118649	0.216849	-0.216849	0.983098	1
305	OG0003031	455.671	412.198	138.684	180.696	330.408	270.922	466.985	430.57	349.811	353.418	-1.57798	1.57798	1.18669	-1.18669	0.486695	-0.486695	-0.0615288	0.0615288	0.984388	1
1531	OG0006633	262.803	273.856	236.46	216.292	540.408	483.125	630.932	786.648	228.525	223.335	0.709472	-0.709472	0.891389	-0.891389	-1.74957	1.74957	0.182927	-0.182927	0.984695	1
1497	OG0006406	180.841	167.226	108.548	159.073	251.193	208.129	122.901	111.655	349.945	316.203	-1.77641	1.77641	0.88218	-0.88218	0.451118	-0.451118	0.476598	-0.476598	0.984975	1
1498	OG0006410	122.537	106.849	353.016	373.6	61.9326	100.88	180.847	116.815	56.4493	50.3056	-0.179335	0.179335	-1.51435	1.51435	1.36177	-1.36177	0.364308	-0.364308	0.985375	1
553	OG0003624	225.044	226.512	119.673	84.0872	129.336	109.603	971.752	1572.02	216.048	227.227	1.2106	-1.2106	0.572486	-0.572486	-1.63574	1.63574	-0.174807	0.174807	0.987865	1
497	OG0003463	274.017	258.871	288.572	323.246	358.096	291.522	471.962	552.695	230.131	215.964	-0.8154	0.8154	1.47447	-1.47447	-1.13361	1.13361	0.45692	-0.45692	0.992062	1
1148	OG0005004	108.465	118.794	96.6072	79.473	55.5818	85.2138	478.202	422.482	137.502	123.643	0.825876	-0.825876	-1.78622	1.78622	0.525057	-0.525057	0.450419	-0.450419	0.993198	1
1080	OG0004840	186.144	147.461	66.8108	91.7548	68.7093	87.8859	245.233	175.626	118.844	94.7147	-1.09245	1.09245	-0.850426	0.850426	1.14858	-1.14858	0.784643	-0.784643	0.995389	1
1014	OG0004679	101.123	100.771	147.951	144.941	133.367	142.91	93.9274	95.6704	123.188	115.167	0.434386	-0.434386	-1.46004	1.46004	-0.388586	0.388586	1.42238	-1.42238	0.996401	1
939	OG0004518	345.579	305.127	219.881	205.516	79.8704	66.5392	173.036	235.274	377.765	357.666	0.371019	-0.371019	1.00042	-1.00042	-1.67475	1.67475	0.300279	-0.300279	0.998587	1
484	OG0003431	208.773	171.348	76.2213	116.007	192.921	205.116	536.186	455.709	174.169	126.962	-1.50924	1.50924	-0.223402	0.223402	0.591639	-0.591639	1.14315	-1.14315	0.998992	1
1205	OG0005134	418.773	423.919	223.239	274.946	134.13	137.432	508.6	453.288	167.574	149.072	-1.65595	1.65595	-0.193948	0.193948	0.917438	-0.917438	0.932217	-0.932217	0.999892	1

## Sheet: Metapolybia
	Row.names	M_cin Queen	M_cin Worker	A_caj Queen.x	A_caj Worker.x	V_cra Queen.x	V_cra Worker.x	V_vul Queen.x	V_vul Worker.x	P_qua Queen.x	P_qua Worker.x	A_caj Queen.y	A_caj Worker.y	V_cra Queen.y	V_cra Worker.y	V_vul Queen.y	V_vul Worker.y	P_qua Queen.y	P_qua Worker.y	p.coeffs	q.coeffs
1557	OG0006563	272.754	285.05	378.772	470.867	308.457	386.978	361.124	471.823	310.55	390.065	-0.975794	0.975794	-1.01645	1.01645	-1.19642	1.19642	-1.0217	1.0217	8.4701e-08	0.000140265
410	OG0003217	662.354	888.383	201.707	217.516	734.087	808.019	586.796	663.979	558.71	618.056	-0.452036	0.452036	-0.574698	0.574698	-0.739707	0.739707	-0.604533	0.604533	7.64602e-06	0.0126542
1633	OG0007672	1297.41	1424.94	2981.49	3686.53	1192.15	1513.32	71.9103	96.4195	2915.51	3420.38	-0.956262	0.956262	-1.07361	1.07361	-1.31684	1.31684	-0.720665	0.720665	2.47802e-05	0.0409864
23	OG0001416	350.233	439.208	1228.89	1098.04	539.555	483.326	446.306	405.299	345.442	325.776	0.803078	-0.803078	0.785053	-0.785053	0.687679	-0.687679	0.418423	-0.418423	3.86191e-05	0.0638374
1648	OG0008004	215.6	202.989	121.811	116.776	64.8734	59.0753	290.417	265.218	215.31	198.997	0.529507	-0.529507	1.17368	-1.17368	1.13789	-1.13789	0.987911	-0.987911	9.66222e-05	0.15962
984	OG0004558	342.924	308.316	257.581	216.097	376.421	332.247	225.073	171.867	122.116	104.814	0.951047	-0.951047	0.676906	-0.676906	1.45559	-1.45559	0.827981	-0.827981	0.000178328	0.294419
742	OG0004037	1744.46	1751.52	1629.93	1585.95	357.436	340.881	1458.65	1382.04	2349.89	2190.93	0.557805	-0.557805	0.966785	-0.966785	1.09978	-1.09978	1.42755	-1.42755	0.000209265	0.345287
210	OG0002788	104.463	104.981	218.262	180.364	363.53	315.052	385.171	319.43	104.198	97.2483	1.30064	-1.30064	0.977328	-0.977328	1.27643	-1.27643	0.471979	-0.471979	0.000316386	0.52172
496	OG0003421	354.996	363.127	898.474	854.834	268.844	254.802	81.8528	80.3701	320.926	306.146	1.15059	-1.15059	1.23957	-1.23957	0.422537	-0.422537	1.08954	-1.08954	0.000317002	0.522419
862	OG0004285	61.5999	69.1005	133.609	113.279	75.3813	46.7739	108.166	75.8035	63.4934	46.2821	0.503345	-0.503345	1.43145	-1.43145	1.07524	-1.07524	0.958333	-0.958333	0.000330122	0.543711
161	OG0002517	172.416	353.828	324.256	354.241	59.428	76.6499	51.0077	60.1807	397.778	487.493	-0.238982	0.238982	-0.684385	0.684385	-0.446126	0.446126	-0.548022	0.548022	0.000356321	0.586505
1086	OG0004801	538.526	476.085	482.916	411.599	661.472	555.822	665.281	489.536	327.839	287.237	0.795551	-0.795551	0.866045	-0.866045	1.51858	-1.51858	0.658695	-0.658695	0.000392445	0.645572
1640	OG0007817	174.956	160.467	269.182	256.75	175.001	158.506	294.207	282.082	149.616	137.948	0.601006	-0.601006	1.25761	-1.25761	0.534965	-0.534965	1.03178	-1.03178	0.000427004	0.701994
1289	OG0005264	171.784	207.976	789.548	699.649	619.391	557.419	1202.36	1055.89	960.887	922.398	0.902707	-0.902707	0.787467	-0.787467	0.969911	-0.969911	0.305611	-0.305611	0.000427875	0.702998
973	OG0004533	239.732	222.926	116.782	96.0644	94.2238	69.0669	214.019	153.99	126.042	112.014	0.812344	-0.812344	1.28574	-1.28574	1.36132	-1.36132	0.491806	-0.491806	0.000491798	0.807532
31	OG0001535	286.728	524.601	740.497	851.627	2556.82	3387.98	1820.71	2850.06	1939.24	2753.16	-0.34056	0.34056	-0.682153	0.682153	-1.07525	1.07525	-0.846298	0.846298	0.000521064	0.855066
1525	OG0006349	185.752	173.76	308.93	283.028	383.408	347.041	736.721	629.89	127.773	120.838	0.833723	-0.833723	0.948636	-0.948636	1.48948	-1.48948	0.531482	-0.531482	0.000525734	0.862205
640	OG0003772	197.183	96.0144	115.008	61.5709	95.6967	49.3179	134.896	82.5558	49.6631	40.8796	1.04102	-1.04102	1.10018	-1.10018	0.827996	-0.827996	0.333714	-0.333714	0.000533499	0.874406
1281	OG0005236	252.75	267.11	361.647	352.166	336.058	316.731	285.283	261.86	275.189	260.225	0.423346	-0.423346	0.943646	-0.943646	1.36445	-1.36445	0.8908	-0.8908	0.000557699	0.91351
179	OG0002613	99.3917	121.596	121.993	79.3952	338.288	259.858	237.279	175.78	72.9262	64.1107	1.43089	-1.43089	0.887008	-0.887008	1.00717	-1.00717	0.435173	-0.435173	0.000635105	1
361	OG0003114	77.1586	91.3632	154.434	141.093	151.354	131.752	99.5182	84.188	53.9065	41.4198	0.49086	-0.49086	0.752875	-0.752875	0.907417	-0.907417	1.42435	-1.42435	0.000669073	1
927	OG0004438	63.5082	61.1303	263.384	247.846	67.6585	57.3036	80.6953	71.6173	51.076	41.7818	0.437427	-0.437427	1.1926	-1.1926	0.857801	-0.857801	1.44054	-1.44054	0.000690374	1
309	OG0003002	396.906	364.131	418.9	322.116	266.573	187.839	589.433	452.774	688.524	628.139	1.06069	-1.06069	1.4071	-1.4071	1.06487	-1.06487	0.372451	-0.372451	0.000707859	1
1043	OG0004685	269.576	268.106	347.933	335.976	337.109	306.186	225.166	214.759	416.95	382.143	0.520321	-0.520321	1.43058	-1.43058	0.704005	-0.704005	1.29633	-1.29633	0.000746525	1
490	OG0003405	107.006	84.0542	120.432	139.276	214.77	237.655	165.185	192.317	80.1525	83.7401	-0.91186	0.91186	-0.635686	0.635686	-0.953731	0.953731	-0.275092	0.275092	0.000762592	1
674	OG0003873	656.642	518.943	843.556	688.686	187.224	135.358	182.943	123.655	353.301	311.911	0.710556	-0.710556	1.13032	-1.13032	1.35944	-1.35944	0.437418	-0.437418	0.000800218	1
148	OG0002457	377.537	336.881	308.865	289.841	209.579	199.423	588.139	518.322	228.04	199.354	0.583341	-0.583341	0.455845	-0.455845	1.15844	-1.15844	1.23224	-1.23224	0.000851478	1
1100	OG0004829	117.484	116.898	113.813	97.4022	216.601	166.232	212.77	134.746	115.828	92.5643	0.561309	-0.561309	0.950485	-0.950485	1.62197	-1.62197	0.806472	-0.806472	0.000856405	1
574	OG0003618	72.075	65.1137	157.729	152.692	203.367	184.74	696.379	609.555	58.9372	53.1254	0.310961	-0.310961	0.91984	-0.91984	1.27418	-1.27418	0.993944	-0.993944	0.000884861	1
1273	OG0005220	330.147	391.636	299.594	246.747	132.598	120.359	177.81	167.266	251.146	221.686	1.33089	-1.33089	0.66571	-0.66571	0.420409	-0.420409	0.857263	-0.857263	0.000959813	1
449	OG0003294	403.26	406.656	271.978	243.324	996.674	961.634	871.017	746.567	445.084	397.268	1.05206	-1.05206	0.338534	-0.338534	1.45562	-1.45562	1.07398	-1.07398	0.00101015	1
307	OG0002999	92.3998	80.7285	102.272	84.8472	73.6659	60.9768	110.986	74.8589	63.3362	54.7462	0.773763	-0.773763	0.783064	-0.783064	1.61524	-1.61524	0.604445	-0.604445	0.0010811	1
759	OG0004067	292.123	277.083	216.39	199.382	227.966	214.451	202.284	189.641	323.282	276.612	0.851017	-0.851017	0.635512	-0.635512	0.67108	-0.67108	1.61845	-1.61845	0.00113919	1
1098	OG0004826	166.704	153.487	162.46	139.713	213.694	199.201	163.198	123.329	150.563	123.361	0.821074	-0.821074	0.382867	-0.382867	1.51768	-1.51768	1.08313	-1.08313	0.0013091	1
1077	OG0004784	352.51	378.888	87.7405	127.484	631.995	860.147	1365.65	1591.77	464.411	524.231	-1.49905	1.49905	-1.24122	1.24122	-0.62068	0.62068	-0.491178	0.491178	0.00135487	1
1429	OG0005599	601.075	734.228	229.853	235.729	436.908	447.142	341.884	365.194	536.861	560.066	-0.246765	0.246765	-0.226356	0.226356	-0.644558	0.644558	-0.413615	0.413615	0.00139003	1
172	OG0002568	570.266	548.173	866.365	729.001	233.404	164.386	310.116	261.306	695.284	623.275	0.832069	-0.832069	1.6767	-1.6767	0.825452	-0.825452	0.527756	-0.527756	0.00149011	1
348	OG0003079	471.846	340.203	123.341	70.9969	551.531	342.241	239.64	147.467	719.773	655.103	1.23928	-1.23928	1.07741	-1.07741	1.09554	-1.09554	0.216418	-0.216418	0.00150885	1
1190	OG0005038	907.169	699.344	1764.08	1693.59	267.81	248.78	909.239	778.861	689.623	618.054	0.26095	-0.26095	0.471519	-0.471519	0.988544	-0.988544	0.70051	-0.70051	0.00153699	1
1158	OG0004975	365.97	265.06	659.666	631.106	322.532	262.364	1151.03	1019.12	417.422	351.887	0.215151	-0.215151	1.00025	-1.00025	0.590998	-0.590998	0.828321	-0.828321	0.00154356	1
1417	OG0005573	234.013	366.117	309.206	324.194	1162.9	1227.53	1138.31	1311.51	923.797	1012.26	-0.210557	0.210557	-0.240562	0.240562	-0.629119	0.629119	-0.406603	0.406603	0.00155145	1
419	OG0003239	124.26	195.577	146.009	118.858	539.799	474.368	296.474	247.672	256.172	246.181	0.805788	-0.805788	0.507141	-0.507141	0.704971	-0.704971	0.15633	-0.15633	0.00171523	1
1068	OG0004759	182.51	398.626	76.4629	110.554	766.614	1101.15	531.706	888.162	1288.1	1406.29	-0.74619	0.74619	-0.733176	0.733176	-1.02765	1.02765	-0.179569	0.179569	0.00174421	1
483	OG0003380	457.233	411.965	166.448	150.943	276.909	233.212	316.498	220.14	149.459	122.098	0.442557	-0.442557	0.776022	-0.776022	1.6267	-1.6267	0.912786	-0.912786	0.00178378	1
711	OG0003962	165.748	170.763	127.781	112.068	97.4189	72.7802	183.961	126.265	94.4542	83.3799	0.549601	-0.549601	1.21449	-1.21449	1.56025	-1.56025	0.522437	-0.522437	0.00179914	1
249	OG0002874	119.389	143.194	303.212	274.392	759.138	687.494	467.302	380.361	139.561	131.285	0.674642	-0.674642	0.669634	-0.669634	1.38679	-1.38679	0.413185	-0.413185	0.0018119	1
345	OG0003076	109.232	112.629	102.968	99.2162	117.372	99.2941	299.48	268.383	67.8923	62.1315	0.352089	-0.352089	1.58295	-1.58295	1.03891	-1.03891	0.840567	-0.840567	0.00183553	1
353	OG0003093	218.457	214.953	158.074	137.984	50.6923	38.9411	253.096	234.003	297.977	265.447	0.880489	-0.880489	1.70112	-1.70112	0.508612	-0.508612	0.749155	-0.749155	0.00192929	1
1006	OG0004601	99.7029	83.0276	154.879	140.623	81.7376	58.075	117.091	70.6831	75.9091	57.9859	0.297535	-0.297535	1.04383	-1.04383	1.52431	-1.52431	0.825592	-0.825592	0.00215873	1
688	OG0003905	185.438	202.989	267.187	310.683	99.4811	105.139	96.9281	101.541	323.912	352.247	-1.5387	1.5387	-0.5653	0.5653	-0.475099	0.475099	-0.85666	0.85666	0.0023448	1
1398	OG0005518	99.3886	84.0542	169.875	119.527	357.996	223.474	211.475	169.192	68.6797	62.4899	1.13708	-1.13708	1.51207	-1.51207	0.725996	-0.725996	0.308424	-0.308424	0.00241657	1
224	OG0002814	181.307	206.315	215.383	250.101	228.027	247.298	154.827	210.583	196.609	276.973	-0.628128	0.628128	-0.341443	0.341443	-1.28503	1.28503	-1.42911	1.42911	0.00243864	1
285	OG0002958	341.34	313.957	537.165	445.796	828.933	799.316	1007.16	789.362	234.171	177.745	0.938123	-0.938123	0.183576	-0.183576	1.22354	-1.22354	1.3825	-1.3825	0.00255868	1
873	OG0004311	426.112	362.121	477.649	414.826	266.145	249.9	483.994	445.403	420.027	406.534	1.23888	-1.23888	0.554034	-0.554034	0.730815	-0.730815	0.287321	-0.287321	0.00256706	1
53	OG0001805	1206.9	1327.8	324.475	267.149	336.024	277.127	770.248	486.565	967.488	841.002	0.742048	-0.742048	0.735615	-0.735615	1.72856	-1.72856	0.535609	-0.535609	0.00264634	1
200	OG0002766	729.362	540.206	328.012	253.145	102.341	87.4386	360.337	220.206	444.609	378.363	0.825068	-0.825068	0.502918	-0.502918	1.54595	-1.54595	0.515551	-0.515551	0.00270644	1
1285	OG0005246	127.963	126.912	99.5353	56.1939	127.596	84.1792	287.226	235.438	105.927	91.8439	1.61045	-1.61045	1.18632	-1.18632	0.573356	-0.573356	0.412051	-0.412051	0.00293711	1
1411	OG0005547	177.814	172.095	211.414	178.357	201.681	168.083	318.671	314.537	145.689	123.899	1.20501	-1.20501	1.291	-1.291	0.0927587	-0.0927587	1.14837	-1.14837	0.00337912	1
1377	OG0005471	442.306	255.153	603.414	478.737	373.231	348.986	649.549	491.2	176.805	160.817	0.743979	-0.743979	0.216779	-0.216779	0.896374	-0.896374	0.3058	-0.3058	0.003593	1
994	OG0004581	157.172	270.435	748.896	921.661	367.629	390.288	335.782	441.452	453.883	500.996	-0.684675	0.684675	-0.19793	0.19793	-0.9001	0.9001	-0.326649	0.326649	0.00360997	1
569	OG0003609	491.65	344.114	122.1	109.318	663.761	391.495	447.49	278.228	263.405	215.383	0.288243	-0.288243	1.34643	-1.34643	1.21714	-1.21714	0.523411	-0.523411	0.00364515	1
1456	OG0005652	414.682	258.472	208.235	144.382	89.3472	47.5379	123.103	103.368	77.4792	64.6509	0.8684	-0.8684	1.46474	-1.46474	0.417897	-0.417897	0.432837	-0.432837	0.00380083	1
920	OG0004425	1255.81	766.122	1188.52	1086.32	2666.68	2025.86	722.183	477.118	542.365	468.586	0.26807	-0.26807	0.814805	-0.814805	1.21921	-1.21921	0.435442	-0.435442	0.00381217	1
228	OG0002825	776.987	792.039	1001.72	973.464	160.387	148.612	683.262	607.515	622.046	598.79	0.407167	-0.407167	1.08453	-1.08453	1.67019	-1.67019	0.542164	-0.542164	0.00390488	1
933	OG0004447	611.236	542.199	605.868	588.152	661.443	564.876	370.834	308.797	404.005	372.681	0.222775	-0.222775	1.1823	-1.1823	1.37052	-1.37052	0.605523	-0.605523	0.00396169	1
454	OG0003306	108.911	120.264	201.544	177.287	200.519	186.71	103.543	72.5104	82.0384	63.212	0.575569	-0.575569	0.320544	-0.320544	1.58441	-1.58441	1.16505	-1.16505	0.00405132	1
737	OG0004026	58.4278	79.7352	126.163	145.537	112.609	126.248	186.526	205.597	75.5948	76.3565	-0.814148	0.814148	-0.651992	0.651992	-0.555291	0.555291	-0.0572357	0.0572357	0.00408176	1
934	OG0004448	356.752	509.767	428.72	440.755	433.534	458.219	268.218	308.992	506.848	578.975	-0.144068	0.144068	-0.288113	0.288113	-0.735204	0.735204	-0.691348	0.691348	0.00420491	1
475	OG0003361	171.778	169.434	406.61	352.724	360.636	329.492	449.683	327.912	241.242	217.904	0.81371	-0.81371	0.517453	-0.517453	1.79562	-1.79562	0.582812	-0.582812	0.00444033	1
1287	OG0005254	532.49	523.255	285.817	253.155	859.696	714.298	640.763	479.816	284.304	271.932	0.703355	-0.703355	1.07213	-1.07213	1.667	-1.667	0.258155	-0.258155	0.00461921	1
325	OG0003036	237.191	252.495	255.841	278.232	106.916	132.796	163.937	172.062	203.839	225.644	-0.671286	0.671286	-1.72866	1.72866	-0.387168	0.387168	-0.812925	0.812925	0.00462697	1
703	OG0003945	175.909	159.474	160.4	122.059	93.2154	85.6224	197.648	131.06	102.941	90.0431	1.10318	-1.10318	0.345049	-0.345049	1.6463	-1.6463	0.543157	-0.543157	0.00465271	1
284	OG0002956	197.501	148.503	177.5	167.528	299.057	234.65	67.795	49.0582	121.802	108.412	0.241327	-0.241327	1.00764	-1.00764	1.33884	-1.33884	0.485653	-0.485653	0.00469534	1
55	OG0001823	47.9431	54.4857	182.422	185.065	338.734	383.028	214.159	238.471	249.573	264.727	-0.141329	0.141329	-1.20606	1.20606	-1.05561	1.05561	-0.579069	0.579069	0.0047593	1
488	OG0003401	603.295	416.616	840.659	377.161	592.406	298.321	663.656	247.409	98.6646	95.0621	1.14587	-1.14587	0.994028	-0.994028	1.37553	-1.37553	0.0559866	-0.0559866	0.00478297	1
1434	OG0005610	399.761	249.837	157.917	71.4113	1311.6	763.849	891.629	588.334	404.538	378.842	1.44118	-1.44118	1.00833	-1.00833	0.78297	-0.78297	0.12532	-0.12532	0.00495107	1
1106	OG0004841	170.829	172.76	163.087	115.442	62.6368	26.05	115.981	75.2829	152.29	131.643	0.725681	-0.725681	1.75009	-1.75009	0.902681	-0.902681	0.308483	-0.308483	0.00507415	1
1049	OG0004698	1056.62	1280.06	920.518	987.011	148.114	152.838	566.865	645.052	604.916	730.791	-0.48085	0.48085	-0.216537	0.216537	-0.889955	0.889955	-1.29998	1.29998	0.00508582	1
399	OG0003195	141.616	122.59	152.12	146.598	80.906	49.0541	513.083	338.936	132.645	101.929	0.111138	-0.111138	1.47337	-1.47337	1.22872	-1.22872	0.787172	-0.787172	0.00532581	1
463	OG0003329	88.2752	132.889	172.277	181.476	305.171	349.591	304.614	323.476	299.863	308.848	-0.254216	0.254216	-0.663182	0.663182	-0.293575	0.293575	-0.144289	0.144289	0.00535754	1
560	OG0003586	252.118	339.871	216.264	217.738	270.344	295.676	250.691	289.324	256.329	291.921	-0.0394573	0.0394573	-0.520112	0.520112	-0.831384	0.831384	-0.754442	0.754442	0.00536507	1
1442	OG0005628	705.004	632.17	756.854	755.321	170.242	148.812	171.058	148.64	262.46	222.408	0.0155063	-0.0155063	1.02776	-1.02776	1.07295	-1.07295	1.26397	-1.26397	0.00538166	1
1123	OG0004891	135.266	153.822	204.874	194.596	158.451	130.653	150.433	141.758	157.005	143.887	0.420983	-0.420983	1.57322	-1.57322	0.48577	-0.48577	0.713281	-0.713281	0.00539465	1
173	OG0002569	322.285	312.303	177.951	146.496	244.304	231.921	350.394	330.619	401.234	367.374	1.79641	-1.79641	0.481815	-0.481815	0.53804	-0.53804	0.816285	-0.816285	0.00561673	1
1426	OG0005594	171.467	152.826	343.186	320.083	120.619	96.2395	231.592	168.376	126.36	116.336	0.352889	-0.352889	1.13896	-1.13896	1.60125	-1.60125	0.418442	-0.418442	0.00606515	1
598	OG0003671	194.008	226.913	532.958	496.169	196.025	156.885	459.301	315.092	144.433	128.762	0.315803	-0.315803	0.979797	-0.979797	1.64514	-1.64514	0.506774	-0.506774	0.00623562	1
837	OG0004242	166.196	147.885	131.992	114.845	146.729	122.21	154.61	134.377	134.686	134.704	1.00644	-1.00644	1.32087	-1.32087	1.01439	-1.01439	-0.000988937	0.000988937	0.00636697	1
1572	OG0006693	52.0741	58.1402	126.474	123.22	174.262	174.155	335.921	323.084	52.6476	51.1445	0.449071	-0.449071	0.0105462	-0.0105462	0.671352	-0.671352	0.499137	-0.499137	0.00636989	1
1109	OG0004847	442.319	298.392	427.766	430.2	57.9936	41.3584	343.55	235.244	190.013	141.369	-0.0172026	0.0172026	1.0154	-1.0154	1.13478	-1.13478	0.890188	-0.890188	0.00655758	1
657	OG0003819	186.705	156.813	159.319	125.879	165.533	117.329	251.432	191.567	76.2235	76.1728	0.94948	-0.94948	1.38001	-1.38001	1.09431	-1.09431	0.00268934	-0.00268934	0.00664827	1
675	OG0003878	91.7648	119.271	346.971	287.704	279.311	268.926	449.774	363.76	166.12	156.133	1.01345	-1.01345	0.205571	-0.205571	1.14746	-1.14746	0.336344	-0.336344	0.00683618	1
1151	OG0004963	230.523	210.634	301.534	287.975	257.201	237.799	250.045	239.744	241.4	203.858	0.452069	-0.452069	0.770346	-0.770346	0.413346	-0.413346	1.65716	-1.65716	0.00691991	1
1450	OG0005640	158.445	129.237	203.168	197.522	433.311	405.238	191.683	155.948	162.505	139.025	0.177821	-0.177821	0.42248	-0.42248	1.29722	-1.29722	0.982673	-0.982673	0.00726465	1
779	OG0004107	304.824	729.577	402.872	869.977	296.773	476.268	321.492	631.658	1070.04	1068.54	-1.14396	1.14396	-0.723807	0.723807	-1.01439	1.01439	0.00217863	-0.00217863	0.00733687	1
702	OG0003941	75.2535	79.4029	97.3218	96.8181	53.296	43.6407	72.5114	56.625	55.1654	48.2613	0.0316507	-0.0316507	1.21509	-1.21509	1.50076	-1.50076	0.814336	-0.814336	0.00755892	1
434	OG0003264	256.878	268.442	168.887	138.193	236.511	211.13	349.192	326.673	106.399	103.369	1.73075	-1.73075	0.981769	-0.981769	0.576913	-0.576913	0.25003	-0.25003	0.00779994	1
220	OG0002809	188.927	140.865	234.32	228.339	48.9905	36.8352	337.847	286.215	101.998	90.7634	0.120618	-0.120618	1.32125	-1.32125	0.771839	-0.771839	0.543717	-0.543717	0.00800613	1
19	OG0001320	575.673	668.775	375.89	432.494	186.981	250.167	103.033	160.058	815.077	861.734	-0.52798	0.52798	-1.08988	1.08988	-1.63436	1.63436	-0.209808	0.209808	0.00803468	1
1282	OG0005237	220.042	285.718	97.6385	93.3531	347.366	288.726	343.227	255.402	114.728	105.172	0.214416	-0.214416	0.880962	-0.880962	1.40199	-1.40199	0.415272	-0.415272	0.00803982	1
89	OG0002048	105.101	90.3665	107.308	100.127	281.121	270.999	176.7	142.378	60.193	54.2059	0.500536	-0.500536	0.265069	-0.265069	1.55525	-1.55525	0.756681	-0.756681	0.00818345	1
765	OG0004081	174.639	63.1237	128.433	114.332	304.559	149.598	859.771	359.3	116.614	91.4856	0.170393	-0.170393	1.00096	-1.00096	1.20434	-1.20434	0.354237	-0.354237	0.00820002	1
960	OG0004498	832.551	713.633	453.41	70.2073	150.47	112.451	300.08	123.656	220.498	152.533	1.77039	-1.77039	0.349813	-0.349813	1.00721	-1.00721	0.440753	-0.440753	0.00837219	1
236	OG0002840	297.521	220.601	238.816	224.733	142.754	98.5755	411.854	212.898	250.357	195.934	0.155055	-0.155055	0.934299	-0.934299	1.6253	-1.6253	0.622374	-0.622374	0.00871444	1
1541	OG0006462	240.049	192.029	141.313	88.3905	350.443	330.93	1052.76	911.876	144.746	107.331	1.59899	-1.59899	0.198755	-0.198755	0.497671	-0.497671	1.03011	-1.03011	0.00882076	1
1340	OG0005379	314.032	366.117	103.316	111.386	240.699	241.597	224.84	251.388	215.312	251.58	-0.622172	0.622172	-0.0308169	0.0308169	-0.922783	0.922783	-1.28589	1.28589	0.00885433	1
1348	OG0005402	174.96	170.102	109.139	116.398	102.631	130.101	155.013	212.834	93.6668	99.7677	-0.337736	0.337736	-1.23855	1.23855	-1.64942	1.64942	-0.330956	0.330956	0.0089934	1
1103	OG0004836	135.269	130.234	197.459	198.41	246.811	197.767	326.071	287.432	118.343	97.6085	-0.0317596	0.0317596	1.45917	-1.45917	0.833069	-0.833069	1.27	-1.27	0.00937586	1
1443	OG0005629	536.935	521.604	252.075	291.773	1000.98	1093.64	335.088	406.527	1156.08	1160.66	-1.19542	1.19542	-0.724432	0.724432	-1.57761	1.57761	-0.0323804	0.0323804	0.0095057	1
12	OG0001237	571.86	479.737	330.31	293.655	219.769	213.624	514.84	414.61	480.444	449.137	0.802897	-0.802897	0.193815	-0.193815	1.47389	-1.47389	0.460302	-0.460302	0.00956937	1
1385	OG0005487	254.338	278.741	203.792	246.349	67.2823	102.773	161.95	189.506	177.121	186.569	-0.809279	0.809279	-1.7865	1.7865	-0.67117	0.67117	-0.222375	0.222375	0.00957264	1
1263	OG0005198	309.587	321.266	145.338	127.856	219.237	180.817	191.637	113.251	142.073	124.078	0.467444	-0.467444	0.701523	-0.701523	1.87807	-1.87807	0.493899	-0.493899	0.00966337	1
554	OG0003575	263.86	258.478	232.725	228.518	143.022	119.756	321.351	207.029	126.674	92.2059	0.0685549	-0.0685549	0.66552	-0.66552	1.6264	-1.6264	1.18373	-1.18373	0.0097267	1
1597	OG0006939	65.407	65.4493	185.398	164.285	268.531	268.769	154.965	143.553	78.7365	67.7124	1.23396	-1.23396	-0.00905133	0.00905133	0.781281	-0.781281	1.53845	-1.53845	0.00980366	1
264	OG0002915	314.353	389.373	436.915	489.001	244.028	255.691	282.507	363.628	487.203	522.432	-0.666529	0.666529	-0.27654	0.27654	-1.48757	1.48757	-0.413431	0.413431	0.00999044	1
140	OG0002402	187.34	192.361	152.512	242.731	117.272	165.283	98.0384	184.098	230.244	226.909	-1.16	1.16	-0.863498	0.863498	-1.55012	1.55012	0.0370733	-0.0370733	0.0100608	1
407	OG0003210	231.79	207.644	144.953	102.9	91.3118	42.6614	2145.36	716.011	216.256	200.616	0.558967	-0.558967	1.19633	-1.19633	1.64569	-1.64569	0.123601	-0.123601	0.0100948	1
244	OG0002857	1048.47	822.628	435.363	344.707	272.03	181.116	210.644	190.751	604.345	566.728	0.919948	-0.919948	1.58815	-1.58815	0.392317	-0.392317	0.254277	-0.254277	0.0102642	1
67	OG0001962	582.341	784.395	950.735	968.498	331.845	385.302	695.055	769.758	682.396	710.258	-0.11242	0.11242	-0.905434	0.905434	-0.619476	0.619476	-0.243013	0.243013	0.0103139	1
913	OG0004408	163.23	164.115	188.552	156.875	67.7854	46.6621	62.2909	55.5153	217.198	206.735	0.9031	-0.9031	1.81764	-1.81764	0.566415	-0.566415	0.243041	-0.243041	0.0103857	1
1427	OG0005595	203.851	146.849	269.931	270.173	253.758	233.869	205.834	174.67	239.043	212.864	-0.00487592	0.00487592	0.443004	-0.443004	0.889555	-0.889555	0.629202	-0.629202	0.010436	1
1003	OG0004598	118.119	220.601	107.938	126.326	294.503	388.796	243.894	458.417	181.366	203.679	-0.360448	0.360448	-0.633687	0.633687	-1.40265	1.40265	-0.266104	0.266104	0.0106653	1
1509	OG0006250	331.804	344.18	212.066	158.454	585.785	528.905	513.64	343.769	294.677	281.116	1.21632	-1.21632	0.428945	-0.428945	1.66544	-1.66544	0.197972	-0.197972	0.0109177	1
549	OG0003563	149.237	132.889	158.165	91.7968	440.586	425.611	308.544	201.352	137.829	115.662	1.58678	-1.58678	0.103315	-0.103315	1.25635	-1.25635	0.522609	-0.522609	0.0109923	1
352	OG0003091	189.245	183.394	217.202	230.727	62.315	87.1429	58.9807	82.6501	214.716	229.468	-0.266455	0.266455	-1.46594	1.46594	-1.47477	1.47477	-0.293071	0.293071	0.0113645	1
1590	OG0006844	243.539	214.621	119.335	115.197	191.758	155.07	219.939	137.454	103.884	85.8975	0.134226	-0.134226	0.804848	-0.804848	1.75602	-1.75602	0.721098	-0.721098	0.0113857	1
273	OG0002930	214.647	234.222	97.7702	88.1719	547.085	540.281	367.783	320.18	213.897	205.66	1.10734	-1.10734	0.134219	-0.134219	1.48433	-1.48433	0.421153	-0.421153	0.0114218	1
1057	OG0004718	195.913	184.713	104.081	103.242	150.468	112.522	128.006	99.1931	170.206	152.353	0.0424767	-0.0424767	1.51444	-1.51444	1.33108	-1.33108	0.580945	-0.580945	0.0114273	1
1173	OG0005003	316.896	470.441	928.381	1024.43	527.936	882.055	610.752	1389.64	1528.4	1854.71	-0.202907	0.202907	-1.03604	1.03604	-1.60622	1.60622	-0.397887	0.397887	0.0114911	1
545	OG0003556	430.558	438.208	315.245	415.355	421.247	484.778	267.525	294.641	271.261	277.513	-1.79487	1.79487	-0.918505	0.918505	-0.631826	0.631826	-0.149222	0.149222	0.0117274	1
304	OG0002995	628.7	361.798	266.554	280.542	1295.75	797.919	396.593	228.98	297.837	202.633	-0.111228	0.111228	1.03441	-1.03441	1.1656	-1.1656	0.827557	-0.827557	0.0117487	1
1401	OG0005525	267.655	213.717	746.473	732.952	91.1849	71.3178	303.571	240.069	302.381	280.214	0.0938461	-0.0938461	1.2554	-1.2554	1.19944	-1.19944	0.390699	-0.390699	0.0117659	1
1370	OG0005460	85.4143	86.3798	134.497	131.498	303.617	278.246	184.146	139.443	65.6936	49.3436	0.117627	-0.117627	0.454895	-0.454895	1.44123	-1.44123	1.48278	-1.48278	0.0118056	1
780	OG0004108	582.802	631.071	587.653	561.375	64.5041	50.0622	386	341.954	540.16	509.82	0.323491	-0.323491	1.78308	-1.78308	0.855882	-0.855882	0.408732	-0.408732	0.0118756	1
308	OG0003001	926.202	852.562	868.783	811.437	838.209	707.363	1900.37	1218.75	445.241	388.986	0.289953	-0.289953	0.719223	-0.719223	1.85654	-1.85654	0.572884	-0.572884	0.0123115	1
1378	OG0005473	200.358	249.172	376.677	372.43	137.297	125.209	552.299	426.646	206.196	175.764	0.0627195	-0.0627195	0.509438	-0.509438	1.42	-1.42	0.881438	-0.881438	0.012325	1
103	OG0002171	307.05	376.413	1056.48	1391.02	286.703	292.509	696.026	929.585	384.732	419.961	-1.27593	1.27593	-0.0935701	0.0935701	-1.34117	1.34117	-0.408669	0.408669	0.0123369	1
1539	OG0006449	66.0452	49.8345	174.703	123.351	82.0322	77.883	75.0553	52.6791	51.8634	48.1748	1.27654	-1.27654	0.19224	-0.19224	1.29791	-1.29791	0.273183	-0.273183	0.0124421	1
1188	OG0005035	612.801	496.989	166.1	163.874	576.691	485.989	837.443	545.312	133.429	105.172	0.0516233	-0.0516233	0.653008	-0.653008	1.61634	-1.61634	0.906047	-0.906047	0.0124859	1
69	OG0001969	676.973	906.659	544.248	495.876	109.327	52.3729	661.29	473.977	497.877	407.886	0.22977	-0.22977	1.74019	-1.74019	0.815176	-0.815176	0.49087	-0.49087	0.0126053	1
1472	OG0005851	474.376	440.537	235.879	229.98	106.155	102.96	3335.8	2835.64	346.069	310.829	0.253723	-0.253723	0.306139	-0.306139	1.62394	-1.62394	1.07493	-1.07493	0.012734	1
1128	OG0004903	635.685	546.518	1624.43	1489.53	224.451	153.703	182.48	153.65	173.821	162.798	0.406942	-0.406942	1.75746	-1.75746	0.80569	-0.80569	0.307608	-0.307608	0.0127576	1
1338	OG0005377	44.1328	53.1568	149.038	140.976	225.704	189.4	96.8361	61.518	76.379	65.5514	0.218881	-0.218881	0.688604	-0.688604	1.75607	-1.75607	0.600667	-0.600667	0.012788	1
613	OG0003711	113.039	125.247	102.548	62.1354	205.59	208.078	158.989	102.683	88.9536	71.4942	1.49638	-1.49638	-0.0366653	0.0366653	1.31211	-1.31211	0.663537	-0.663537	0.0129565	1
392	OG0003178	488.671	558.475	265.454	191.362	453.677	411.708	751.75	552.26	735.203	720.341	1.44607	-1.44607	0.432393	-0.432393	1.36396	-1.36396	0.0910342	-0.0910342	0.0129898	1
359	OG0003109	269.265	215.282	311.26	232.769	305.287	293.91	86.6627	69.0851	199.751	188.552	1.40938	-1.40938	0.185469	-0.185469	1.10248	-1.10248	0.281736	-0.281736	0.0130827	1
41	OG0001681	1574.93	1221.61	1133.1	1136.88	236.794	169.25	375.644	241.669	565.782	474.707	-0.0112591	0.0112591	1.12492	-1.12492	1.46767	-1.46767	0.591931	-0.591931	0.0132632	1
805	OG0004160	606.93	602.226	1084.74	1063.73	158.073	153.033	258.229	224.25	498.677	462.64	0.252707	-0.252707	0.418615	-0.418615	1.81997	-1.81997	0.968769	-0.968769	0.0134074	1
1099	OG0004827	479.152	401.669	323.864	309.306	403.225	380.996	401.17	355.865	276.132	274.269	0.433407	-0.433407	0.534334	-0.534334	1.12816	-1.12816	0.0637808	-0.0637808	0.0134526	1
105	OG0002180	239.728	275.086	325.851	313.868	75.0844	74.5274	476.04	417.553	340.573	307.769	0.363885	-0.363885	0.0723158	-0.0723158	1.27141	-1.27141	0.982834	-0.982834	0.0135776	1
648	OG0003790	311.489	320.934	570.863	843.754	387.41	489.313	410.005	479.911	467.935	468.827	-1.71226	1.71226	-1.03168	1.03168	-0.697252	0.697252	-0.00845475	0.00845475	0.0137815	1
1623	OG0007130	349.598	351.835	315.201	279.136	516.443	476.652	98.1772	79.3602	267.018	265.629	1.00096	-1.00096	0.66093	-0.66093	1.74833	-1.74833	0.043014	-0.043014	0.0138873	1
1275	OG0005223	273.068	261.465	211.411	150.542	50.0419	46.5603	510.588	434.768	280.062	264.909	1.8482	-1.8482	0.396095	-0.396095	0.881443	-0.881443	0.3056	-0.3056	0.0139395	1
450	OG0003295	494.072	285.718	389.218	380.189	1246.65	1054.86	1312.7	1081.65	312.75	301.102	0.0838493	-0.0838493	0.595393	-0.595393	0.689465	-0.689465	0.135581	-0.135581	0.0140767	1
1362	OG0005437	394.681	421.593	417.608	445.046	601.07	668.405	365.656	492.112	972.511	1038.86	-0.405143	0.405143	-0.675645	0.675645	-1.87788	1.87788	-0.420164	0.420164	0.0142531	1
1365	OG0005441	436.915	511.631	170.64	171.831	209.756	283.761	291.11	367.902	536.395	591.225	-0.0349264	0.0349264	-1.50549	1.50549	-1.16987	1.16987	-0.488168	0.488168	0.0142603	1
292	OG0002967	180.989	173.421	177.306	170.947	161.773	160.381	152.931	134.764	117.713	109.312	0.493297	-0.493297	0.116753	-0.116753	1.70607	-1.70607	0.999722	-0.999722	0.0143203	1
1491	OG0006061	834.767	673.423	587.994	571.705	2483.23	1524.04	1438.76	786.329	671.081	568.172	0.0740753	-0.0740753	1.2623	-1.2623	1.5463	-1.5463	0.437926	-0.437926	0.0143764	1
1457	OG0005653	400.082	448.846	1027.52	992.453	680.609	683.963	731.819	691.377	391.815	377.138	0.532741	-0.532741	-0.0754217	0.0754217	0.871984	-0.871984	0.585713	-0.585713	0.014511	1
943	OG0004464	143.839	137.211	254.897	181.554	290.229	294.272	685.528	558.618	58.7785	49.7038	1.65766	-1.65766	-0.0682301	0.0682301	1.00622	-1.00622	0.825177	-0.825177	0.0145346	1
1464	OG0005804	364.201	757.152	155.299	164.034	179.807	188.452	361.524	494.785	638.077	771.671	-0.146297	0.146297	-0.125563	0.125563	-0.832379	0.832379	-0.506867	0.506867	0.0146056	1
1361	OG0005435	524.552	626.914	80.8429	118.117	2733.4	2623.94	1170.91	1773.12	891.42	1129.32	-1.26231	1.26231	0.137675	-0.137675	-1.37826	1.37826	-0.793247	0.793247	0.0148272	1
986	OG0004561	569.008	400.334	439.834	441.855	290.748	179.076	436.734	184.848	295.382	212.03	-0.00922069	0.00922069	0.956329	-0.956329	1.63044	-1.63044	0.660935	-0.660935	0.0151029	1
343	OG0003072	403.895	386.387	175.788	178.768	298.167	225.356	212.178	156.66	63.8077	55.6466	-0.082038	0.082038	1.35758	-1.35758	1.46927	-1.46927	0.66688	-0.66688	0.0151645	1
525	OG0003487	308.949	344.855	308.861	65.3328	327.177	226.225	123.334	80.7628	242.186	191.43	1.91996	-1.91996	0.538163	-0.538163	0.615342	-0.615342	0.345323	-0.345323	0.0152048	1
1288	OG0005256	325.787	347.519	249.498	226.675	318.793	323.388	1319.96	1092.39	641.533	554.674	0.76725	-0.76725	-0.114553	0.114553	1.51007	-1.51007	1.16231	-1.16231	0.0152308	1
256	OG0002896	181.31	222.258	347.889	372.169	133.658	165.177	701.345	753.644	1635.9	1682.73	-0.461264	0.461264	-1.4428	1.4428	-0.491707	0.491707	-0.193048	0.193048	0.0154979	1
1056	OG0004715	131.138	77.4096	346.152	341.722	119.323	61.2795	285.792	175.453	66.9509	54.9263	0.0280867	-0.0280867	1.40142	-1.40142	1.04312	-1.04312	0.430217	-0.430217	0.0155628	1
776	OG0004104	211.475	200.667	367.35	169.913	82.0322	66.6138	81.9911	61.0614	109.65	99.9946	1.89059	-1.89059	0.533634	-0.533634	0.752704	-0.752704	0.236946	-0.236946	0.015634	1
111	OG0002244	99.3854	106.646	133.437	131.912	230.234	172.059	138.779	99.5871	127.703	116.611	0.0538349	-0.0538349	1.35463	-1.35463	1.54021	-1.54021	0.425296	-0.425296	0.0159182	1
632	OG0003754	363.569	351.164	138.732	264.702	224.743	288.321	164.487	221.757	468.375	474.884	-1.8015	1.8015	-0.714947	0.714947	-0.855477	0.855477	-0.0398103	0.0398103	0.0159201	1
853	OG0004275	468.029	438.872	488.255	476.365	309.2	228.436	669.667	618.735	551.165	470.025	0.147034	-0.147034	1.79185	-1.79185	0.471528	-0.471528	0.947758	-0.947758	0.0159811	1
1372	OG0005463	501.69	448.51	650.383	627.739	442.412	364.634	344.104	267.633	551.793	532.331	0.221911	-0.221911	1.20713	-1.20713	1.56576	-1.56576	0.224858	-0.224858	0.0161527	1
975	OG0004539	544.556	712.301	1088.64	1088.39	1584.67	2087.61	1583.32	2051.72	876.963	959.495	0.0010236	-0.0010236	-1.23663	1.23663	-1.16352	1.16352	-0.405797	0.405797	0.0163181	1
1629	OG0007553	40.0082	67.1104	158.635	157.75	79.8455	93.5042	438.862	489.714	107.341	114.355	0.0217932	-0.0217932	-0.61348	0.61348	-0.426385	0.426385	-0.246305	0.246305	0.0163223	1
631	OG0003753	221.633	242.189	282.425	302.513	598.697	636.998	206.24	316.287	766.057	978.322	-0.289642	0.289642	-0.26141	0.26141	-1.77619	1.77619	-1.02627	1.02627	0.0164025	1
507	OG0003437	668.07	653.164	228.718	172.04	267.86	244.005	603.536	586.151	592.187	534.317	1.89165	-1.89165	0.623351	-0.623351	0.195464	-0.195464	0.687116	-0.687116	0.0164361	1
1144	OG0004941	634.961	620.675	1090.56	1098.02	475.499	385.011	279.641	235.276	332.869	307.767	-0.0509909	0.0509909	1.57116	-1.57116	1.28734	-1.28734	0.585425	-0.585425	0.0165664	1
390	OG0003175	388.654	449.839	557.554	556.823	245.281	209.083	635.215	556.924	407.519	388.449	0.010808	-0.010808	1.31331	-1.31331	1.08263	-1.08263	0.394943	-0.394943	0.0167024	1
823	OG0004207	1020.84	1651.18	206.884	228.029	668.252	852.3	1387.06	2063.66	1782.06	1824.81	-0.309214	0.309214	-0.76981	0.76981	-1.24703	1.24703	-0.0753909	0.0753909	0.0169598	1
391	OG0003176	1894.04	1204.68	601.655	489.024	764.461	628.034	515.996	377.948	757.535	786.116	0.714711	-0.714711	0.678077	-0.678077	1.06878	-1.06878	-0.128141	0.128141	0.01723	1
1005	OG0004600	187.657	194.687	415.815	419.352	162.036	134.017	104.976	77.1422	118.816	105.534	-0.0472328	0.0472328	1.05556	-1.05556	1.70457	-1.70457	0.660283	-0.660283	0.0174118	1
915	OG0004414	117.802	152.161	226.094	218.834	102.187	169.678	329.447	440.118	599.099	766.083	0.102626	-0.102626	-1.56153	1.56153	-0.904566	0.904566	-0.769376	0.769376	0.0177634	1
1399	OG0005522	172.734	310.306	166.436	236.133	233.126	231.687	342.319	400.387	460.33	540.619	-1.04447	1.04447	0.0186735	-0.0186735	-0.471672	0.471672	-0.483905	0.483905	0.0180396	1
440	OG0003277	136.85	165.45	88.1512	120.737	36.4681	47.8214	115.357	120.199	213.735	222.406	-1.44776	1.44776	-1.25005	1.25005	-0.190784	0.190784	-0.184513	0.184513	0.018186	1
896	OG0004362	1347.9	1159.48	559.529	532.059	1192.61	794.586	721.232	596.359	868.867	801.558	0.223591	-0.223591	1.77961	-1.77961	0.842063	-0.842063	0.358016	-0.358016	0.0182496	1
136	OG0002381	354.361	315.622	274.941	254.356	446.013	363.765	237.234	171.474	253.186	249.241	0.406849	-0.406849	1.06251	-1.06251	1.68313	-1.68313	0.0821382	-0.0821382	0.0182531	1
369	OG0003134	345.782	336.217	355.395	301.792	370.319	293.937	477.427	483.827	455.615	415.641	1.1607	-1.1607	1.63635	-1.63635	-0.0947508	0.0947508	0.652921	-0.652921	0.0185255	1
367	OG0003126	548.68	551.498	684.018	683.192	940.418	982.207	666.8	760.136	548.493	594.463	0.0160527	-0.0160527	-0.577455	0.577455	-1.73778	1.73778	-1.06854	1.06854	0.0185688	1
49	OG0001771	217.822	227.913	634.108	431.133	96.4105	97.3704	156.306	90.9726	405.666	342.32	1.19808	-1.19808	-0.0311439	0.0311439	1.66127	-1.66127	0.532494	-0.532494	0.0186391	1
954	OG0004488	81.9215	73.4228	188.113	172.556	164.466	140.033	171.058	135.561	102.314	103.371	0.581974	-0.581974	1.08258	-1.08258	1.56195	-1.56195	-0.0693602	0.0693602	0.0186821	1
1620	OG0007115	96.5277	78.0707	227.307	243.399	49.3734	28.7757	217.627	154.284	51.5475	36.7376	-0.19455	0.19455	1.49987	-1.49987	0.969219	-0.969219	0.954604	-0.954604	0.0186943	1
441	OG0003278	144.791	118.606	117.582	80.4588	223.406	101.606	113.346	105.096	160.148	136.505	0.904578	-0.904578	1.80844	-1.80844	0.182249	-0.182249	0.384593	-0.384593	0.0187115	1
250	OG0002878	220.68	261.804	426.396	442.752	531.698	576.296	286.762	351.299	241.874	250.322	-0.283949	0.283949	-0.607358	0.607358	-1.52621	1.52621	-0.258993	0.258993	0.0188012	1
1395	OG0005513	177.157	197.497	271.191	256.091	61.8074	59.7139	431.324	371.425	262.46	257.165	0.615666	-0.615666	0.370369	-0.370369	1.60418	-1.60418	0.219087	-0.219087	0.0188765	1
365	OG0003124	128.595	136.546	308.388	334.762	129.205	145.168	69.7835	98.9638	193.623	204.58	-0.45455	0.45455	-0.644887	0.644887	-1.91676	1.91676	-0.304985	0.304985	0.0189769	1
272	OG0002929	450.886	355.483	849.306	880.613	281.221	234.123	93.4907	61.4512	226.627	164.599	-0.12756	0.12756	0.644186	-0.644186	1.45754	-1.45754	1.11754	-1.11754	0.0189959	1
362	OG0003116	228.304	220.607	590.214	566.478	69.2198	30.9077	128.19	82.0362	177.28	147.312	0.0964161	-0.0964161	1.79778	-1.79778	1.03152	-1.03152	0.433781	-0.433781	0.0190264	1
1516	OG0006293	131.014	125.141	145.483	148.474	826.221	743.712	541.894	445.631	86.4374	67.354	-0.128324	0.128324	0.662833	-0.662833	1.2294	-1.2294	1.56497	-1.56497	0.019129	1
606	OG0003697	840.807	862.143	1260.72	1226.83	157.157	109.028	1093.73	605.983	364.618	319.469	0.0835163	-0.0835163	1.10845	-1.10845	1.75919	-1.75919	0.404606	-0.404606	0.0192693	1
1191	OG0005042	174.328	218.604	107.088	396.575	1488.73	1856.84	345.169	831.249	1139.9	1226.57	-1.67919	1.67919	-0.321451	0.321451	-1.20714	1.20714	-0.107	0.107	0.0194265	1
1617	OG0007098	126.061	162.135	215.264	222.143	381.674	383.163	557.941	571.7	224.111	241.856	-0.252039	0.252039	-0.0311979	0.0311979	-0.195223	0.195223	-0.610349	0.610349	0.019714	1
1462	OG0005791	345.14	411.629	519.357	513.106	566.582	544.533	259.987	256.307	602.714	553.585	0.128396	-0.128396	0.420833	-0.420833	0.151136	-0.151136	0.901052	-0.901052	0.0197641	1
859	OG0004282	348.325	364.788	107.251	89.9925	245.156	233.257	53.9202	45.829	315.581	316.231	1.49627	-1.49627	0.425336	-0.425336	1.38711	-1.38711	-0.0176056	0.0176056	0.0197874	1
56	OG0001830	260.374	284.392	283.105	234.202	222.48	197.68	185.393	151.806	323.282	333.7	1.28021	-1.28021	0.799316	-0.799316	1.34891	-1.34891	-0.214742	0.214742	0.0198219	1
580	OG0003629	882.723	684.39	901.239	893.899	499.941	301.378	996.524	767.443	745.888	643.268	0.0274616	-0.0274616	1.66427	-1.66427	0.872223	-0.872223	0.49615	-0.49615	0.0204	1
159	OG0002500	247.987	224.255	515.858	513.383	1433.43	1351.09	1358.29	1051.77	348.586	274.091	0.0277034	-0.0277034	0.340722	-0.340722	1.46547	-1.46547	1.3785	-1.3785	0.0204486	1
1519	OG0006318	275.612	250.834	470.927	463.686	203.83	196.325	127.265	101.117	134.376	111.475	0.105188	-0.105188	0.254628	-0.254628	1.55444	-1.55444	1.2647	-1.2647	0.0207949	1
1649	OG0008030	111.772	133.889	714.763	676.967	60.3821	46.1519	300.636	281.887	60.1914	56.3688	0.33949	-0.33949	1.66978	-1.66978	0.402356	-0.402356	0.409967	-0.409967	0.0211288	1
473	OG0003358	158.445	268.771	430.566	489.667	255.161	309.017	55.7538	89.7977	702.7	725.49	-0.370946	0.370946	-0.551364	0.551364	-1.35096	1.35096	-0.0921657	0.0921657	0.0212607	1
1245	OG0005159	318.471	301.877	110.531	87.95	668.053	637.241	449.589	334.892	286.661	281.295	1.27761	-1.27761	0.265091	-0.265091	1.64193	-1.64193	0.106118	-0.106118	0.0214192	1
1405	OG0005530	100.02	106.314	112.083	114.016	70.6724	42.8378	138.087	86.7655	78.5809	68.2545	-0.0527647	0.0527647	1.51318	-1.51318	1.40845	-1.40845	0.433973	-0.433973	0.0219724	1
437	OG0003270	249.578	289.037	296.747	252.858	136.636	132.648	244.496	163.025	176.648	159.016	0.724361	-0.724361	0.134318	-0.134318	1.81345	-1.81345	0.476489	-0.476489	0.0220002	1
809	OG0004165	67.1788	117.483	227.407	223.216	70.269	140.375	81.2054	201.808	295.778	371.696	0.0320226	-0.0320226	-1.14592	1.14592	-1.46722	1.46722	-0.391611	0.391611	0.0220809	1
174	OG0002587	2344.61	1688.39	2543.64	2604.63	654.968	383.838	502.169	374.066	633.362	522.97	-0.0710184	0.0710184	1.5646	-1.5646	0.876395	-0.876395	0.572287	-0.572287	0.0221489	1
423	OG0003249	279.101	211.627	205.147	189.93	59.9606	44.7008	412.178	410.501	105.456	89.6811	0.372214	-0.372214	1.40898	-1.40898	0.0196995	-0.0196995	0.781196	-0.781196	0.0222079	1
623	OG0003736	338.167	412.958	145.649	227.131	496.306	535.29	307.619	335.74	254.025	290.855	-1.81037	1.81037	-0.312985	0.312985	-0.362015	0.362015	-0.559832	0.559832	0.022697	1
1293	OG0005269	121.93	147.51	210.37	243.892	73.6115	77.8175	92.6278	132.691	481.324	507.409	-0.71794	0.71794	-0.270227	0.270227	-1.72989	1.72989	-0.256675	0.256675	0.0227507	1
1179	OG0005015	395.004	599.675	657.089	718.945	371.962	437.171	82.3615	137.845	761.457	834.698	-0.279444	0.279444	-0.500998	0.500998	-1.56632	1.56632	-0.285249	0.285249	0.0231024	1
1469	OG0005815	357.216	351.496	454.422	445.891	1163.09	1249.73	717.068	833.169	546.293	603.829	0.205646	-0.205646	-0.779228	0.779228	-1.62521	1.62521	-1.0856	1.0856	0.0233555	1
1387	OG0005491	718.833	957.294	505.838	1072	130.769	132.864	253.328	545.148	835.788	963.643	-1.41917	1.41917	-0.0314267	0.0314267	-1.44547	1.44547	-0.281021	0.281021	0.0233919	1
1037	OG0004667	268.944	271.428	405.446	359.699	92.3203	59.1077	102.223	95.7972	218.252	195.545	0.537087	-0.537087	1.97025	-1.97025	0.291486	-0.291486	0.49295	-0.49295	0.0235823	1
35	OG0001595	465.171	706.324	419.721	622.91	1570.39	1993.33	2114.81	2577.33	1318.74	1254.13	-1.2771	1.2771	-0.77773	0.77773	-0.645979	0.645979	0.16458	-0.16458	0.0240097	1
301	OG0002988	80.3339	77.7418	127.119	129.52	72.9906	56.3828	122.687	112.337	52.9635	44.4813	-0.122257	0.122257	1.67751	-1.67751	0.575488	-0.575488	1.1375	-1.1375	0.0240995	1
826	OG0004211	169.241	149.507	365.039	384.969	131.279	94.1716	312.52	246.627	291.537	243.837	-0.243809	0.243809	1.51014	-1.51014	1.08124	-1.08124	0.817472	-0.817472	0.0241015	1
1178	OG0005014	547.731	538.548	638.714	585.333	344.542	269.428	600.162	415.688	460.643	462.463	0.414043	-0.414043	1.16154	-1.16154	1.72412	-1.72412	-0.0187227	0.0187227	0.0242208	1
1127	OG0004902	82.5565	68.4394	47.4052	99.2684	143.715	157.87	65.251	161.33	288.549	306.867	-1.33282	1.33282	-0.17691	0.17691	-1.59833	1.59833	-0.115962	0.115962	0.0252205	1
283	OG0002955	622.984	803.664	218.146	108.864	66.5685	67.2738	566.681	406.521	90.9967	74.1973	1.74432	-1.74432	-0.0275062	0.0275062	0.858993	-0.858993	0.530808	-0.530808	0.025224	1
543	OG0003554	118.434	117.609	157.569	158.389	189.639	177.959	131.842	102.748	72.7659	54.2077	-0.0283246	0.0283246	0.346814	-0.346814	1.35367	-1.35367	1.59532	-1.59532	0.025326	1
1371	OG0005461	484.543	703.331	2011.27	2011.8	1016.77	1246.46	893.751	1189.59	1595.98	1690.65	-0.00107988	0.00107988	-0.843013	0.843013	-1.17955	1.17955	-0.239272	0.239272	0.0254147	1
813	OG0004185	261.006	242.863	248.482	227.494	60.1011	40.003	266.738	240.527	227.412	212.68	0.429925	-0.429925	1.95746	-1.95746	0.503776	-0.503776	0.326357	-0.326357	0.0257308	1
242	OG0002852	95.2576	82.393	387.939	310.856	85.2183	79.2223	68.2574	48.7972	110.483	110.755	1.08653	-1.08653	0.359164	-0.359164	1.63754	-1.63754	-0.012094	0.012094	0.0258404	1
1478	OG0005937	151.774	161.467	186.122	247.292	295.923	304.862	348.591	444.033	153.077	156.135	-1.58467	1.58467	-0.167053	0.167053	-1.35199	1.35199	-0.111026	0.111026	0.0260086	1
747	OG0004046	1396.15	1737.55	919.282	939.681	624.888	871.444	651.446	1114.24	1683.2	1831.48	-0.0703083	0.0703083	-1.05573	1.05573	-1.67934	1.67934	-0.270296	0.270296	0.0261341	1
1382	OG0005482	81.2483	34.8841	281.428	215.059	718.802	498.618	606.081	92.2115	49.6631	36.3774	0.322041	-0.322041	0.435714	-0.435714	1.77285	-1.77285	0.371996	-0.371996	0.026171	1
1249	OG0005170	463.507	420.693	522.273	449.555	739.718	606.248	400.489	226.175	326.296	316.066	0.513895	-0.513895	0.681035	-0.681035	1.91038	-1.91038	0.10938	-0.10938	0.0262926	1
1331	OG0005354	187.657	195.683	246.187	232.123	55.1814	29.3776	57.5744	36.402	82.6671	78.6959	0.16336	-0.16336	1.69539	-1.69539	1.25169	-1.25169	0.136731	-0.136731	0.0265075	1
878	OG0004319	782.7	778.411	1066.5	961.454	307.705	235.768	708.835	379.252	498.362	471.64	0.327275	-0.327275	0.83634	-0.83634	1.91385	-1.91385	0.174057	-0.174057	0.0265403	1
127	OG0002350	3747.75	3125.29	2237.68	2018.39	1026.42	883.547	720.951	400.519	3547.21	3180.63	0.343817	-0.343817	0.49915	-0.49915	1.90663	-1.90663	0.363582	-0.363582	0.0268327	1
1458	OG0005654	428.659	509.644	56.184	110.828	339.84	388.424	49.7351	72.7703	571.722	575.849	-1.76681	1.76681	-0.360247	0.360247	-1.01539	1.01539	-0.0194219	0.0194219	0.0273434	1
1628	OG0007547	698.876	795.026	129.925	196.175	296.871	298.309	367.32	499.32	439.11	468.944	-1.63238	1.63238	-0.0194128	0.0194128	-1.22385	1.22385	-0.263997	0.263997	0.027631	1
1467	OG0005810	144.788	159.474	169.273	221.696	285.323	314.965	115.148	217.173	518.007	547.644	-0.82882	0.82882	-0.305241	0.305241	-1.89771	1.89771	-0.171911	0.171911	0.0277443	1
1390	OG0005500	509.304	567.449	913.861	861.454	247.393	312.375	245.004	320.769	754.064	882.781	0.307839	-0.307839	-1.21058	1.21058	-1.39648	1.39648	-0.820044	0.820044	0.0277837	1
667	OG0003856	141.299	194.687	294.289	345.435	37.0074	64.4053	189.187	237.169	280.062	280.034	-0.495208	0.495208	-1.67337	1.67337	-0.697065	0.697065	0.000312777	-0.000312777	0.0278451	1
190	OG0002660	355.946	422.932	521.414	491.22	587.142	569.817	371.713	270.014	364.771	323.431	0.327801	-0.327801	0.164628	-0.164628	1.74224	-1.74224	0.660379	-0.660379	0.0278841	1
1602	OG0006956	743.012	1150.51	1319.99	1220.14	552.551	1347.98	465.174	2090.8	2879.2	4114.61	0.102741	-0.102741	-1.0939	1.0939	-1.66232	1.66232	-0.461686	0.461686	0.0281362	1
50	OG0001783	286.722	283.718	171.411	141.677	753.942	684.713	425.173	335.445	321.866	333.882	1.25878	-1.25878	0.637817	-0.637817	1.56359	-1.56359	-0.242873	0.242873	0.0290619	1
746	OG0004045	754.884	547.814	494.027	384.457	492.427	448.032	562.664	365.7	411.919	415.459	0.891497	-0.891497	0.337405	-0.337405	1.51645	-1.51645	-0.0305761	0.0305761	0.0294073	1
1498	OG0006124	77.1554	172.763	226.774	242.682	1102.76	1201.78	520.667	750.383	555.924	593.731	-0.167993	0.167993	-0.213017	0.213017	-0.895996	0.895996	-0.163039	0.163039	0.0294091	1
182	OG0002626	292.441	375.088	364.434	415.263	336.063	352.199	231.453	228.067	165.806	180.266	-0.933872	0.933872	-0.335847	0.335847	0.105576	-0.105576	-0.598574	0.598574	0.0295381	1
727	OG0003993	349.278	906.991	162.934	167.117	1095.59	1352.17	912.482	1615.25	1430.8	1632.12	-0.0499405	0.0499405	-0.413024	0.413024	-1.09547	1.09547	-0.258975	0.258975	0.0295839	1
706	OG0003948	220.677	230.235	159.557	176.579	272.836	193.026	256.842	136.572	122.429	87.882	-0.274809	0.274809	0.929698	-0.929698	1.65899	-1.65899	0.891428	-0.891428	0.0297849	1
1166	OG0004989	648.069	626.914	364.168	246.388	387.108	312.587	506.838	361.573	204.31	222.767	1.45887	-1.45887	0.805462	-0.805462	1.26505	-1.26505	-0.326822	0.326822	0.0299346	1
1021	OG0004639	105.104	117.606	96.9989	100.104	71.6082	102.825	43.6548	57.9952	158.891	162.076	-0.141934	0.141934	-1.61251	1.61251	-1.27116	1.27116	-0.0894176	0.0894176	0.0299877	1
1176	OG0005011	499.467	493.368	707.84	625.008	81.6629	76.6115	406.768	381.177	671.387	683.908	1.69368	-1.69368	0.869791	-0.869791	0.885153	-0.885153	-0.251771	0.251771	0.0300424	1
890	OG0004353	234.334	272.103	144.536	149.299	76.9653	67.6075	154.826	125.645	169.263	153.974	-0.226374	0.226374	0.903878	-0.903878	1.45287	-1.45287	0.660539	-0.660539	0.0303108	1
1589	OG0006835	374.359	1271.11	95.1836	109.543	105.946	113.514	101.184	153.566	230.244	241.312	-0.252964	0.252964	-0.124362	0.124362	-0.741599	0.741599	-0.0846547	0.0846547	0.030602	1
1383	OG0005483	115.579	119.271	138.127	126.819	143.094	148.459	129.531	105.716	96.8116	78.5158	0.590063	-0.590063	-0.254371	0.254371	1.39954	-1.39954	1.44264	-1.44264	0.031042	1
524	OG0003485	294.031	310.632	582.849	553.362	524.669	505.299	323.146	237.958	321.869	293.178	0.335007	-0.335007	0.242755	-0.242755	1.95976	-1.95976	0.602143	-0.602143	0.0318986	1
716	OG0003970	558.527	975.088	604.019	563.78	628.308	835.546	197.695	234.238	1270.18	1588	0.215988	-0.215988	-0.887399	0.887399	-0.530316	0.530316	-0.697007	0.697007	0.0320099	1
812	OG0004170	847.471	703.012	605.809	590.266	156.641	152.993	58.7296	45.3064	544.863	479.933	0.160087	-0.160087	0.145147	-0.145147	1.58952	-1.58952	0.780543	-0.780543	0.0321693	1
639	OG0003771	1660.05	2329.6	1395.78	1425.31	4352.29	4656.72	2419.4	3313.87	2572.42	2851.12	-0.0934993	0.0934993	-0.301856	0.301856	-1.39362	1.39362	-0.459024	0.459024	0.0325087	1
990	OG0004576	105.418	105.981	140.451	92.3515	133.432	87.9938	392.708	343.633	196.452	208.18	1.46025	-1.46025	1.45033	-1.45033	0.471044	-0.471044	-0.204842	0.204842	0.032535	1
972	OG0004532	368.964	376.749	186.768	258.163	429.649	487.347	442.237	466.669	178.221	182.247	-1.94388	1.94388	-0.762225	0.762225	-0.325638	0.325638	-0.135292	0.135292	0.0328972	1
474	OG0003360	306.729	403.659	455.241	451.636	424.943	453.576	285.56	299.901	651.143	664.185	0.0590401	-0.0590401	-0.484145	0.484145	-0.363841	0.363841	-0.147283	0.147283	0.0329323	1
570	OG0003613	233.702	184.388	613.183	627.034	485.95	422.383	341.933	325.498	378.917	328.297	-0.150853	0.150853	0.945278	-0.945278	0.332612	-0.332612	0.966814	-0.966814	0.0330145	1
1308	OG0005303	361.347	185.717	113.465	213.389	69.1133	96.8078	130.039	195.905	103.098	90.4033	-1.24916	1.24916	-0.682018	0.682018	-0.8257	0.8257	0.26807	-0.26807	0.0333932	1
77	OG0002001	582.341	577.741	901.439	981.862	98.6154	121.868	101.83	137.609	502.954	486.694	-0.480375	0.480375	-1.18636	1.18636	-1.68096	1.68096	0.184828	-0.184828	0.033685	1
402	OG0003201	1044.97	1055.49	508.625	572.481	967.371	1037.64	1626.88	2149.67	1148.96	1144.14	-0.810318	0.810318	-0.480824	0.480824	-1.89911	1.89911	0.0288474	-0.0288474	0.0337287	1
1033	OG0004663	389.286	450.171	504.035	524.229	1629.23	2253.87	719.842	1808.19	654.161	776.216	-0.0879944	0.0879944	-0.720771	0.720771	-1.92898	1.92898	-0.38234	0.38234	0.0342294	1
681	OG0003889	176.226	159.806	280.569	281.006	181.729	151.329	345.631	232.634	169.736	156.495	-0.00733795	0.00733795	0.861161	-0.861161	1.84367	-1.84367	0.382957	-0.382957	0.0343582	1
1419	OG0005575	214.329	205.654	291.263	288.425	147.746	146.054	181.88	178.258	193.939	180.446	0.23929	-0.23929	0.281529	-0.281529	0.491511	-0.491511	1.76141	-1.76141	0.0345386	1
874	OG0004312	190.515	272.761	221.137	219.242	216.332	263.767	201.441	268.712	343.557	359.812	0.0365611	-0.0365611	-0.839694	0.839694	-1.216	1.216	-0.196403	0.196403	0.0347246	1
1224	OG0005118	412.16	378.181	225.222	164.8	82.345	63.716	214.572	230.937	179.952	153.432	1.47275	-1.47275	1.21249	-1.21249	-0.349191	0.349191	0.756236	-0.756236	0.0347618	1
1647	OG0007983	591.232	1032.24	582.639	594.726	182.708	191.991	1430.81	1991.67	661.335	756.362	-0.0669358	0.0669358	-0.161544	0.161544	-1.06847	1.06847	-0.437025	0.437025	0.0348414	1
487	OG0003393	1305.87	1565.38	908.259	915.769	1770.89	2315.44	1527.18	2174.1	2342.42	2413.6	-0.0366748	0.0366748	-1.187	1.187	-1.55685	1.55685	-0.133317	0.133317	0.0349278	1
1481	OG0005965	53.6618	53.1568	87.7091	88.8179	96.1477	97.8622	91.5633	102.682	91.1538	94.5452	-0.217591	0.217591	-0.306132	0.306132	-1.9829	1.9829	-0.63264	0.63264	0.0349996	1
1578	OG0006766	244.174	272.761	220.08	215.017	99.5219	116.097	324.279	363.004	198.492	209.08	0.216901	-0.216901	-1.43285	1.43285	-1.05022	1.05022	-0.484205	0.484205	0.0351615	1
1264	OG0005199	503.277	598.356	1094.13	1090.69	540.357	543.975	582.866	596.979	516.278	527.652	0.0380703	-0.0380703	-0.0805506	0.0805506	-0.28872	0.28872	-0.262988	0.262988	0.0351796	1
363	OG0003118	670.292	577.758	516.344	506.972	140.393	108.419	389.217	239.181	484.844	458.319	0.0687338	-0.0687338	0.964465	-0.964465	1.7919	-1.7919	0.211067	-0.211067	0.0352068	1
271	OG0002927	480.733	575.425	612.942	706.074	309.989	376.69	617.92	982.624	2121.86	2066.84	-0.548557	0.548557	-0.754665	0.754665	-1.7703	1.7703	0.102044	-0.102044	0.0352451	1
1430	OG0005600	330.233	419.274	873.576	822.001	667.473	858.623	409.588	585.335	786.907	901.872	0.250095	-0.250095	-1.02986	1.02986	-1.45239	1.45239	-0.559723	0.559723	0.0353139	1
153	OG0002474	373.092	323.924	246.949	219.076	99.1434	86.2776	186.319	117.589	199.595	197.016	0.499367	-0.499367	0.579315	-0.579315	1.88818	-1.88818	0.0542983	-0.0542983	0.0353457	1
535	OG0003530	98.1185	162.67	142.407	162.546	264.688	279.59	78.8469	147.794	182.308	214.304	-0.344427	0.344427	-0.1428	0.1428	-1.58662	1.58662	-0.420761	0.420761	0.0354357	1
961	OG0004499	169.809	166.573	102.846	99.6469	170.86	164.24	262.392	192.644	140.344	125.52	0.20271	-0.20271	0.253497	-0.253497	1.96663	-1.96663	0.715383	-0.715383	0.0354572	1
167	OG0002534	330.871	470.434	132.18	179.417	294.219	302.157	422.166	560.939	583.229	584.92	-1.18683	1.18683	-0.104204	0.104204	-1.10509	1.10509	-0.0113326	0.0113326	0.035536	1
1561	OG0006612	168.923	630.905	560.899	523.668	43.9076	220.106	200.747	583.737	429.209	541.699	0.0716853	-0.0716853	-1.39363	1.39363	-1.01947	1.01947	-0.241941	0.241941	0.0357423	1
694	OG0003916	251.47	181.773	137.318	145.606	209.479	144.641	301.7	216.259	239.516	213.04	-0.206097	0.206097	1.2883	-1.2883	1.16066	-1.16066	0.411634	-0.411634	0.0358985	1
1423	OG0005585	151.142	166.45	113.798	118.078	435.161	383.092	336.058	277.711	145.846	134.161	-0.296083	0.296083	1.02063	-1.02063	1.52475	-1.52475	0.669366	-0.669366	0.0363	1
1259	OG0005191	260.053	268.442	518.899	574.364	381.382	487.435	320.15	488.687	429.995	416.541	-0.434336	0.434336	-1.04503	1.04503	-1.7839	1.7839	0.136058	-0.136058	0.0363546	1
1266	OG0005202	201.314	168.105	91.183	132.167	452.986	517.13	458.724	753.517	196.765	185.114	-1.1945	1.1945	-0.430422	0.430422	-1.58304	1.58304	0.198606	-0.198606	0.0366106	1
10	OG0001190	751.268	901.34	485.471	526.066	113.408	139.033	649.551	865.721	983.358	948.699	-0.42129	0.42129	-1.06558	1.06558	-1.49761	1.49761	0.188316	-0.188316	0.0366864	1
20	OG0001328	231.476	305.319	754.743	642.499	172.173	118.491	50.0606	47.1846	318.567	314.971	0.693434	-0.693434	1.59422	-1.59422	0.255295	-0.255295	0.0489987	-0.0489987	0.0368789	1
378	OG0003148	235.432	420.626	2349.52	2209.28	67.8239	189.413	85.1362	441.195	392.589	489.294	0.0741915	-0.0741915	-1.13992	1.13992	-1.63147	1.63147	-0.264458	0.264458	0.0369586	1
415	OG0003231	175.274	152.161	127.235	116.368	89.9477	94.1319	422.258	335.254	72.2928	59.7904	0.549653	-0.549653	-0.280071	0.280071	1.41519	-1.41519	1.1663	-1.1663	0.037068	1
634	OG0003758	396.268	288.043	440.304	400.888	1933.95	564.609	412.685	276.863	385.362	330.818	0.162937	-0.162937	1.90572	-1.90572	0.684924	-0.684924	0.264826	-0.264826	0.0371252	1
1605	OG0006998	985.604	444.514	183.924	170.862	881.28	451.66	175.036	110.738	112.842	113.452	0.14282	-0.14282	1.25034	-1.25034	0.87283	-0.87283	-0.0104628	0.0104628	0.0372357	1
4	OG0000716	1353.6	1368.79	1111.76	829.79	773.949	793.029	428.132	225.065	681.299	588.882	0.877682	-0.877682	-0.0735866	0.0735866	1.87877	-1.87877	0.439711	-0.439711	0.0373364	1
579	OG0003627	871.61	816.624	1191.57	1087.09	822.609	809.57	733.807	635.11	763.808	763.205	1.05968	-1.05968	0.184625	-0.184625	1.66624	-1.66624	0.0091199	-0.0091199	0.0373468	1
637	OG0003765	124.47	126.912	261.604	273.87	212.058	228.184	309.33	303.154	186.865	197.194	-0.920678	0.920678	-1.47217	1.47217	0.405299	-0.405299	-1.08091	1.08091	0.0374463	1
1475	OG0005908	109.229	189.039	307.98	199.173	280.77	281.261	220.309	156.828	135.161	129.842	1.18962	-1.18962	-0.00484109	0.00484109	0.933326	-0.933326	0.111284	-0.111284	0.0376821	1
714	OG0003967	120.025	209.637	276.844	287.12	240.858	302.973	356.407	1216.99	499.146	729.889	-0.0595221	0.0595221	-0.373123	0.373123	-1.78677	1.78677	-0.613309	0.613309	0.0376906	1
63	OG0001938	778.572	607.323	305.168	291.965	258.302	231.048	761.648	505.061	567.979	530.357	0.189809	-0.189809	0.478099	-0.478099	1.73889	-1.73889	0.294051	-0.294051	0.0377284	1
1039	OG0004671	300.703	346.509	141.934	146.94	56.6544	32.4706	134.664	60.8976	157.789	140.649	-0.0775914	0.0775914	1.2148	-1.2148	1.68871	-1.68871	0.257117	-0.257117	0.0377983	1
493	OG0003409	595.992	311.303	116.322	133.413	476.152	630.402	435.438	1079.92	1003.32	1074.03	-0.263045	0.263045	-0.535779	0.535779	-1.63467	1.63467	-0.130832	0.130832	0.0378846	1
808	OG0004164	1016.05	1302.01	1974.54	1983.16	1604.71	2359.67	789.302	1438.56	2040.4	2162.28	-0.0124695	0.0124695	-1.09039	1.09039	-1.66865	1.66865	-0.166049	0.166049	0.038049	1
311	OG0003005	888.118	985.729	313.288	261.514	300.256	258.679	116.165	122.742	572.853	507.665	1.32621	-1.32621	1.09524	-1.09524	-0.405342	0.405342	0.888289	-0.888289	0.0380676	1
559	OG0003585	120.977	182.062	72.8479	90.9061	106.588	164.317	230.853	248.224	154.804	153.794	-0.741502	0.741502	-1.43288	1.43288	-0.243816	0.243816	0.0220234	-0.0220234	0.0380877	1
571	OG0003614	90.8122	51.1634	157.127	159.41	247.755	176.104	134.757	127.7	144.432	92.9245	-0.038937	0.038937	0.912522	-0.912522	0.145143	-0.145143	1.1714	-1.1714	0.0382739	1
607	OG0003698	204.486	197.012	96.0426	134.646	58.3086	85.0043	184.793	230.17	239.673	215.021	-1.27149	1.27149	-1.41536	1.41536	-0.830881	0.830881	0.411953	-0.411953	0.0382964	1
199	OG0002764	255.608	275.422	684.485	705.271	204.63	124.363	46.0138	14.6459	239.672	193.049	-0.0543993	0.0543993	0.887391	-0.887391	1.88085	-1.88085	0.391887	-0.391887	0.0383532	1
1262	OG0005197	486.128	600.339	800.101	804.794	823.719	947.263	1045.91	1079.73	289.333	378.181	-0.0336891	0.0336891	-0.803793	0.803793	-0.183324	0.183324	-1.53364	1.53364	0.0384061	1
212	OG0002790	313.712	300.004	171.762	153.123	206.912	163.18	385.771	300.543	311.182	331.182	0.658651	-0.658651	1.35654	-1.35654	1.42564	-1.42564	-0.357441	0.357441	0.0389149	1
68	OG0001967	177.179	202.664	104.843	104.583	131.891	94.5263	135.82	116.708	153.077	145.148	0.0134752	-0.0134752	1.7918	-1.7918	0.821736	-0.821736	0.288697	-0.288697	0.0390738	1
57	OG0001840	1357.1	487.378	1282.57	775.697	1585.74	258.46	61.274	59.7576	192.21	140.285	0.57497	-0.57497	1.68035	-1.68035	0.0292524	-0.0292524	0.364618	-0.364618	0.0395776	1
1379	OG0005475	67.3153	56.8113	100.84	109.432	57.205	47.6004	45.3664	35.7486	71.6658	58.7081	-0.427231	0.427231	0.958153	-0.958153	1.23968	-1.23968	1.03914	-1.03914	0.0403292	1
680	OG0003888	830.646	1138.55	1403.67	1491.18	1902.62	2511.25	898.439	1803.04	1486.75	1572.87	-0.161698	0.161698	-0.737527	0.737527	-1.79103	1.79103	-0.150555	0.150555	0.0403564	1
949	OG0004481	80.0163	83.3897	192.853	234.877	31.6708	85.1685	49.1117	105.781	150.561	135.245	-0.349083	0.349083	-1.62686	1.62686	-1.29993	1.29993	0.190408	-0.190408	0.0407341	1
1237	OG0005145	567.097	464.125	980.317	1029.05	236.464	193.875	307.989	201.156	327.054	284.896	-0.195673	0.195673	0.798486	-0.798486	1.69296	-1.69296	0.555829	-0.555829	0.0412001	1
152	OG0002469	587.101	780.411	702.457	759.876	158.003	239.955	251.439	406.218	877.591	840.278	-0.240658	0.240658	-1.26216	1.26216	-1.44246	1.44246	0.133124	-0.133124	0.0413728	1
609	OG0003704	273.71	341.865	524.22	518.017	41.4059	68.4353	47.9089	64.3561	495.375	527.834	0.0408957	-0.0408957	-1.6908	1.6908	-1.00663	1.00663	-0.217966	0.217966	0.0415212	1
951	OG0004485	1033.87	879.077	677.886	441.509	481.391	519.236	607.885	401.334	517.377	458.141	1.42988	-1.42988	-0.256099	0.256099	1.38586	-1.38586	0.411173	-0.411173	0.0419344	1
1051	OG0004700	227.45	275.276	290.483	177.525	760.724	557.5	144.328	127.12	283.991	302.366	1.65185	-1.65185	1.0551	-1.0551	0.433864	-0.433864	-0.214475	0.214475	0.0419747	1
409	OG0003216	642.985	1007.65	1588.5	1648.32	16104.4	20466.6	949.586	1038.68	930.555	938.247	-0.153292	0.153292	-0.989422	0.989422	-0.371712	0.371712	-0.0341432	0.0341432	0.042021	1
1192	OG0005043	154	191.364	220.093	259.171	49.5162	53.4204	72.0481	90.5809	207.295	198.815	-0.949093	0.949093	-0.441475	0.441475	-1.32644	1.32644	0.24304	-0.24304	0.0420227	1
1391	OG0005502	172.727	294.02	481.383	496.124	90.2898	99.0329	316.127	516.792	632.101	722.684	-0.087915	0.087915	-0.269225	0.269225	-1.40451	1.40451	-0.38979	0.38979	0.0420866	1
436	OG0003269	118.437	101.33	131.374	130.669	99.7757	79.0676	79.2174	74.141	106.714	101.028	0.039091	-0.039091	1.68227	-1.68227	0.480927	-0.480927	0.397664	-0.397664	0.0421389	1
1480	OG0005954	260.053	190.368	207.871	276.601	65.7482	68.9468	182.142	189.426	154.378	163.697	-1.40516	1.40516	-0.235214	0.235214	-0.194169	0.194169	-0.290168	0.290168	0.0421825	1
162	OG0002522	650.292	467.776	366.115	399.338	119.486	61.3651	347.483	159.406	287.45	249.061	-0.175703	0.175703	1.30096	-1.30096	1.50202	-1.50202	0.289657	-0.289657	0.0424824	1
521	OG0003471	287.37	320.602	341.619	342.345	112.624	105.453	708.929	509.921	271.261	239.516	-0.0121081	0.0121081	0.375065	-0.375065	1.86226	-1.86226	0.70886	-0.70886	0.0424856	1
1369	OG0005457	329.909	283.392	115.403	104.936	538.508	788.157	200.008	442.108	479.186	609.772	0.225359	-0.225359	-0.892706	0.892706	-1.78863	1.78863	-0.568883	0.568883	0.0425161	1
109	OG0002203	190.915	201.637	235.985	215.206	102.656	157.532	174.897	316.853	214.989	252.807	0.263735	-0.263735	-1.2078	1.2078	-1.65314	1.65314	-0.46295	0.46295	0.042599	1
1122	OG0004887	402.927	486.052	866.905	953.075	1066.42	1068.04	622.406	677.901	424.022	425.183	-0.887436	0.887436	-0.0142446	0.0142446	-0.799944	0.799944	-0.0256247	0.0256247	0.0428677	1
740	OG0004032	339.434	420.277	398.759	406.767	301.457	321.585	219.385	306.286	585.27	639.668	-0.103194	0.103194	-0.335323	0.335323	-1.71593	1.71593	-0.460948	0.460948	0.0431115	1
1333	OG0005360	281.962	360.466	316.665	354.91	631.682	730.263	675.216	1022.88	605.073	593.382	-0.472284	0.472284	-0.600289	0.600289	-1.69794	1.69794	0.0808999	-0.0808999	0.0432979	1
1304	OG0005289	115.897	146.513	158.447	131.361	165.401	160.674	175.129	177.443	168.163	148.393	1.21788	-1.21788	0.188936	-0.188936	-0.0855382	0.0855382	0.813817	-0.813817	0.0432988	1
501	OG0003427	653.467	752.83	671.12	696.768	418.405	409.634	184.579	205.825	895.085	966.694	-0.399819	0.399819	0.225879	-0.225879	-1.16046	1.16046	-0.820138	0.820138	0.0434094	1
1438	OG0005623	245.447	353.496	171.045	180.119	193.306	237.658	133.046	299.272	336.169	387.365	-0.123612	0.123612	-0.492297	0.492297	-1.83932	1.83932	-0.338484	0.338484	0.0436429	1
191	OG0002661	412.31	647.34	614.964	667.678	347.488	348.731	167.22	212.442	771.191	806.786	-0.34043	0.34043	-0.0147891	0.0147891	-0.98664	0.98664	-0.186851	0.186851	0.0436507	1
2	OG0000672	981.165	764.471	529.148	568.954	381.928	283.438	559.049	397.029	496.158	442.293	-0.28931	0.28931	1.18138	-1.18138	1.3525	-1.3525	0.458092	-0.458092	0.0438185	1
1497	OG0006107	92.0855	138.875	324.992	451.571	395.205	394.526	161.485	304.328	336.641	360.169	-0.856996	0.856996	0.00452255	-0.00452255	-1.61229	1.61229	-0.177529	0.177529	0.0439312	1
225	OG0002815	321.335	333.223	834.295	802.304	737.436	568.108	367.349	248.325	230.399	233.392	0.176889	-0.176889	1.17371	-1.17371	1.74948	-1.74948	-0.0583903	0.0583903	0.044395	1
872	OG0004309	289.897	281.402	326.676	316.843	257.502	251.796	163.706	163.221	300.966	270.67	0.556587	-0.556587	0.408089	-0.408089	0.0539946	-0.0539946	1.93063	-1.93063	0.0444399	1
1244	OG0005158	194.652	191.866	273.019	240.313	75.2	72.422	277.821	145.526	81.4114	69.6915	0.41101	-0.41101	0.121394	-0.121394	2.01589	-2.01589	0.500343	-0.500343	0.0445488	1
1062	OG0004740	447.082	527.252	332.853	354.626	884.749	1022.86	1560.57	1836.5	900.38	864.77	-0.474824	0.474824	-1.08547	1.08547	-1.2178	1.2178	0.302451	-0.302451	0.0451995	1
1199	OG0005060	683.244	436.454	459.292	504.091	1124.84	438.091	273.768	160.58	289.49	239.335	-0.174189	0.174189	1.6459	-1.6459	0.976132	-0.976132	0.355267	-0.355267	0.0452062	1
1444	OG0005631	52.3917	71.765	102.153	105.415	101.555	83.8511	118.709	73.1947	57.6784	51.1427	-0.108987	0.108987	0.66217	-0.66217	1.64476	-1.64476	0.4165	-0.4165	0.0455588	1
787	OG0004127	288.313	293.027	240.325	320.018	298.371	289.031	502.771	723.7	213.426	224.207	-1.30313	1.30313	0.145691	-0.145691	-1.6505	1.6505	-0.225731	0.225731	0.0459919	1
387	OG0003166	164.072	169.221	116.384	90.1883	59.4122	56.0915	416.155	191.338	111.198	102.995	0.682039	-0.682039	0.154625	-0.154625	1.99037	-1.99037	0.205984	-0.205984	0.0460113	1
710	OG0003959	182.256	155.484	213.637	208.341	369.601	375.744	386.976	354.366	71.0403	63.2084	0.244584	-0.244584	-0.160644	0.160644	0.857297	-0.857297	1.13696	-1.13696	0.0463008	1
1384	OG0005485	284.82	411.633	666.53	729.454	865.871	896.856	950.557	1367.3	485.317	511.447	-0.36532	0.36532	-0.142463	0.142463	-1.45717	1.45717	-0.212457	0.212457	0.0464656	1
729	OG0004002	507.723	526.255	358.866	317.17	641.755	563.002	626.752	630.544	473.844	469.663	1.42526	-1.42526	1.51054	-1.51054	-0.0696851	0.0696851	0.10241	-0.10241	0.0469189	1
439	OG0003274	612.824	488.7	532.058	540.288	137.737	117.509	358.348	274.124	584.485	563.673	-0.0845248	0.0845248	0.872834	-0.872834	1.46663	-1.46663	0.199629	-0.199629	0.0469439	1
1392	OG0005503	1360.27	1999.69	733.499	736.309	536.924	625.462	396.262	412.946	250.36	258.606	-0.0196263	0.0196263	-0.781861	0.781861	-0.211633	0.211633	-0.166289	0.166289	0.0471273	1
1136	OG0004923	93.0317	137.875	160.212	200.808	229.099	218.666	125.6	208.529	102.784	116.336	-0.699376	0.699376	0.144909	-0.144909	-1.54367	1.54367	-0.384664	0.384664	0.0476205	1
90	OG0002060	2309.04	2272.78	3186.74	3145.98	766.974	707.299	1632.29	1236.88	2492.58	2384.34	0.0937131	-0.0937131	0.58935	-0.58935	2.00654	-2.00654	0.323146	-0.323146	0.0479469	1
807	OG0004163	677.284	521.93	456.965	412.206	366.974	393.698	224.933	150.501	197.87	146.41	0.380748	-0.380748	-0.259759	0.259759	1.46587	-1.46587	1.10515	-1.10515	0.047961	1
1564	OG0006620	1593.66	1255.16	894.457	853.346	134.293	107.182	357.639	217.433	160.187	159.097	0.169428	-0.169428	0.808722	-0.808722	1.75617	-1.75617	0.0245909	-0.0245909	0.0481608	1
1002	OG0004597	117.802	121.599	182.576	130.845	151.683	131.624	133.738	110.77	88.7964	95.6258	1.69435	-1.69435	0.726832	-0.726832	0.964296	-0.964296	-0.380144	0.380144	0.0482681	1
1252	OG0005173	342.108	397.111	192.041	186.55	163.763	155.942	201.054	204.092	414.278	378.177	0.334219	-0.334219	0.563612	-0.563612	-0.172783	0.172783	1.04963	-1.04963	0.0483759	1
296	OG0002977	237.823	238.538	340.405	294.644	113.757	107.411	264.645	275.402	207.296	180.448	1.4438	-1.4438	0.574947	-0.574947	-0.399099	0.399099	1.38734	-1.38734	0.0490245	1
849	OG0004265	3581.67	3569.96	2967.04	3001.47	2257.24	2026.97	868.38	674.732	1207.35	1153.19	-0.0883269	0.0883269	0.822887	-0.822887	1.92121	-1.92121	0.351239	-0.351239	0.0490313	1
489	OG0003402	130.503	152.158	213.092	142.131	212.257	214.232	670.36	606.079	89.5822	79.7782	1.864	-1.864	-0.043214	0.043214	0.469906	-0.469906	0.54016	-0.54016	0.0490853	1
1511	OG0006264	108.597	73.7584	87.8847	91.4412	2627.62	2399.53	284.405	177.343	61.6074	48.6215	-0.128863	0.128863	0.294799	-0.294799	1.50653	-1.50653	0.765468	-0.765468	0.0491191	1
1214	OG0005098	1764.69	2743.49	1294.21	1197.64	218.675	348.52	204.216	268.843	1837.2	2098.64	0.233339	-0.233339	-1.37839	1.37839	-0.82258	0.82258	-0.399957	0.399957	0.0491325	1
36	OG0001606	148.602	176.417	494.303	563.091	151.692	152.33	54.2448	116.447	177.121	224.748	-0.346738	0.346738	-0.0111927	0.0111927	-1.94231	1.94231	-0.631666	0.631666	0.0495896	1
892	OG0004357	727.768	732.564	697.465	641.866	1889.57	1887.99	726.41	534.842	491.6	459.22	0.546514	-0.546514	0.00551114	-0.00551114	1.9996	-1.9996	0.448343	-0.448343	0.0497596	1
133	OG0002368	104.783	90.3665	129.797	120.395	46.0944	47.036	262.994	165.765	63.0203	51.5046	0.304583	-0.304583	-0.0819438	0.0819438	1.8379	-1.8379	0.81495	-0.81495	0.0501175	1
1584	OG0006794	527.609	462.138	400.33	401.599	225.944	291.833	312.104	531.57	453.728	473.086	-0.0112766	0.0112766	-0.906509	0.906509	-1.85308	1.85308	-0.148795	0.148795	0.0504373	1
796	OG0004147	200.997	198.341	166.063	151.935	228.874	229.654	235.338	216.748	206.509	205.837	1.54631	-1.54631	-0.0591392	0.0591392	1.43131	-1.43131	0.0567504	-0.0567504	0.0505915	1
633	OG0003757	244.748	426.51	878.345	858.042	422.43	556.995	85.4604	184.685	610.58	701.077	0.0514974	-0.0514974	-0.605092	0.605092	-1.61764	1.61764	-0.303861	0.303861	0.0506285	1
73	OG0001994	746.502	323.592	113.127	76.0248	173.002	177.115	142.202	134.584	250.987	203.677	0.915908	-0.915908	-0.054862	0.054862	0.128513	-0.128513	0.485876	-0.485876	0.0507452	1
827	OG0004218	123.203	117.28	132.324	138.839	485.846	274.625	889.559	339.785	131.071	119.937	-0.0962663	0.0962663	1.1129	-1.1129	1.79189	-1.79189	0.17773	-0.17773	0.050995	1
403	OG0003206	399.447	345.851	328.247	309.551	625.21	514.703	330.187	185.077	149.934	145.688	0.201801	-0.201801	0.667401	-0.667401	1.93881	-1.93881	0.0988802	-0.0988802	0.051	1
836	OG0004241	157.775	334.868	139.432	143.622	583.528	707.735	180.215	742.912	1005.99	1475.81	-0.0424968	0.0424968	-0.276126	0.276126	-1.7498	1.7498	-0.54342	0.54342	0.0510078	1
1570	OG0006668	297.204	298.675	338.286	338.547	218.111	245.595	226.275	260.066	479.185	478.669	-0.00895554	0.00895554	-1.37619	1.37619	-1.61325	1.61325	0.0124989	-0.0124989	0.0512753	1
143	OG0002426	284.185	292.695	365.08	346.57	178.78	155.882	369.449	223.135	244.544	233.752	0.213083	-0.213083	0.560539	-0.560539	2.02278	-2.02278	0.184847	-0.184847	0.0513761	1
1161	OG0004981	76.8411	87.3765	121.996	145.518	233.615	247.079	155.058	167.593	90.5252	88.2422	-1.55954	1.55954	-0.496794	0.496794	-0.689087	0.689087	0.226513	-0.226513	0.0515362	1
1508	OG0006246	91.4441	96.3467	146.561	161.365	85.658	97.4534	161.625	178.586	100.898	95.9859	-1.00731	1.00731	-1.34972	1.34972	-1.04456	1.04456	0.522742	-0.522742	0.0521084	1
595	OG0003663	277.619	274.136	137.143	127.279	69.0317	56.0828	270.716	189.479	363.828	381.242	0.377893	-0.377893	1.04844	-1.04844	1.78824	-1.78824	-0.236772	0.236772	0.0521597	1
1046	OG0004691	918.378	1089.42	439.251	501.116	222.983	243.661	45.1814	44.2633	1890.67	1945.13	-1.1856	1.1856	-0.798581	0.798581	0.184979	-0.184979	-0.255859	0.255859	0.0523003	1
1203	OG0005071	528.994	500.674	956.46	989.604	881.5	817.547	726.27	542.372	437.851	384.664	-0.217245	0.217245	0.480126	-0.480126	1.84902	-1.84902	0.824828	-0.824828	0.0523225	1
480	OG0003371	1653.67	1805.34	1331.77	1307.12	2070.7	2197.42	2244.71	2302.88	1836.49	1946.19	0.317429	-0.317429	-1.00911	1.00911	-0.43473	0.43473	-0.985629	0.985629	0.0534973	1
1117	OG0004874	1139.59	1122.19	680.698	727.258	68.361	65.8354	164.521	204.959	396.518	444.274	-0.542654	0.542654	0.308825	-0.308825	-1.79596	1.79596	-0.932054	0.932054	0.0535393	1
835	OG0004240	107.638	118.274	185.351	155.355	120.732	82.8141	227.707	174.28	135.788	151.813	0.73008	-0.73008	1.54479	-1.54479	1.10212	-1.10212	-0.462052	0.462052	0.053713	1
1626	OG0007459	465.806	472.763	173.597	141.948	189.1	108.823	52.7188	51.0476	143.957	139.027	0.737258	-0.737258	1.98067	-1.98067	0.118387	-0.118387	0.128074	-0.128074	0.0537401	1
876	OG0004317	154.952	142.194	150.204	91.6728	78.2456	82.9107	819.13	630.705	132.484	120.119	1.80897	-1.80897	-0.216395	0.216395	0.971531	-0.971531	0.365924	-0.365924	0.0538804	1
467	OG0003338	223.538	290.704	180.438	247.716	51.9613	65.6554	257.952	249.463	277.549	287.958	-1.40953	1.40953	-1.04439	1.04439	0.150063	-0.150063	-0.165101	0.165101	0.05417	1
1332	OG0005355	1239.93	1141.21	1716.25	1695.97	447.665	342.285	828.24	816.696	848.331	758.483	0.0836337	-0.0836337	1.87717	-1.87717	0.0987471	-0.0987471	0.786838	-0.786838	0.0542984	1
376	OG0003145	525.987	786.365	1189.74	1132.17	653.317	650.839	550.541	541.735	1461.6	1456.36	0.262832	-0.262832	0.0201399	-0.0201399	0.0854508	-0.0854508	0.0190634	-0.0190634	0.0544436	1
472	OG0003353	523.602	884.064	1098.48	1014.93	1927.53	2475.49	1346.59	2934.66	1629.74	2058.03	0.173492	-0.173492	-0.546093	0.546093	-1.62769	1.62769	-0.509628	0.509628	0.0544619	1
701	OG0003940	336.894	349.841	269.482	277.064	462.125	428.917	299.156	258.793	258.058	245.819	-0.334048	0.334048	0.897466	-0.897466	1.74205	-1.74205	0.584896	-0.584896	0.0544882	1
1618	OG0007108	183.53	165.783	208.279	173.969	70.0288	75.6824	152.931	101.997	86.2818	73.8353	0.789921	-0.789921	-0.341455	0.341455	1.75828	-1.75828	0.684088	-0.684088	0.0546818	1
670	OG0003864	636.374	809.129	202.704	194.436	870.441	1136.84	555.396	778.662	889.586	927.51	0.179161	-0.179161	-1.14201	1.14201	-1.4401	1.4401	-0.179592	0.179592	0.0552155	1
620	OG0003732	350.865	348.177	662.977	676.826	38.2016	49.5337	780.839	1125.62	392.119	383.223	-0.0984143	0.0984143	-1.22974	1.22974	-1.72186	1.72186	0.10923	-0.10923	0.0565763	1
764	OG0004077	227.348	260.8	161.993	175.535	119.33	157.858	81.5754	83.0134	203.682	209.44	-0.528865	0.528865	-1.83227	1.83227	-0.115177	0.115177	-0.183746	0.183746	0.0567266	1
817	OG0004196	341.022	345.187	462.182	514.121	162.931	168.302	149.369	191.829	416.322	412.217	-0.826583	0.826583	-0.251943	0.251943	-1.93351	1.93351	0.0769674	-0.0769674	0.0569634	1
246	OG0002862	85.7318	95.0177	93.5532	64.7716	159.988	151.88	72.2793	50.3303	560.439	594.283	1.46523	-1.46523	0.209538	-0.209538	1.44288	-1.44288	-0.236233	0.236233	0.0569678	1
1052	OG0004704	2280.78	2320.96	3982.43	4343.59	1919.76	2170.6	490.377	713.557	1881.7	1834.36	-0.458684	0.458684	-0.648465	0.648465	-1.96021	1.96021	0.134714	-0.134714	0.0572688	1
665	OG0003848	288.951	292.698	182.72	315.359	892.361	961.539	494.078	605.297	718.231	707.02	-1.96502	1.96502	-0.275346	0.275346	-0.746498	0.746498	0.0580416	-0.0580416	0.0579766	1
955	OG0004489	751.106	618.492	897.395	837.698	1243.79	1519.94	832.772	1004.35	480.131	526.21	0.412125	-0.412125	-1.19689	1.19689	-1.11873	1.11873	-0.548482	0.548482	0.0581104	1
184	OG0002640	93.6731	118.935	268.191	258.082	209.839	286.546	110.296	156.914	167.538	171.984	0.155153	-0.155153	-1.24817	1.24817	-1.40917	1.40917	-0.105781	0.105781	0.0586074	1
1286	OG0005248	87.0051	113.284	83.7304	104.561	290.689	352.538	235.801	248.876	69.1512	65.7315	-1.17237	1.17237	-1.01899	1.01899	-0.285886	0.285886	0.268681	-0.268681	0.0586096	1
1492	OG0006067	142.251	147.51	109.728	115.337	164.747	217.093	74.5855	90.5404	64.2776	61.4112	-0.307296	0.307296	-1.6903	1.6903	-1.19134	1.19134	0.28119	-0.28119	0.0586427	1
590	OG0003653	564.563	633.566	445.371	171.189	115.296	80.5279	635.909	623.217	577.728	546.019	1.95224	-1.95224	0.779444	-0.779444	0.0442504	-0.0442504	0.123874	-0.123874	0.0590628	1
1029	OG0004657	158.763	148.503	189.464	189.196	392.683	378.619	290.785	189.447	118.971	100.846	0.00654762	-0.00654762	0.168369	-0.168369	1.94855	-1.94855	0.761389	-0.761389	0.0596533	1
16	OG0001302	648.701	633.895	863.443	816.579	657.391	601.267	411.901	310.395	319.298	323.521	0.39282	-0.39282	0.627924	-0.627924	1.97899	-1.97899	-0.0925228	0.0925228	0.0596563	1
693	OG0003915	164.164	264.458	99.0901	112.593	518.666	674.085	95.3294	398.052	581.418	659.508	-0.200341	0.200341	-0.409234	0.409234	-1.92699	1.92699	-0.197635	0.197635	0.0597926	1
1531	OG0006402	67.6329	66.1137	103.828	118.646	70.7698	89.5694	81.3899	91.0049	117.557	109.853	-0.940477	0.940477	-1.65553	1.65553	-0.787505	0.787505	0.478367	-0.478367	0.0599404	1
704	OG0003946	100.487	86.5326	190.311	209.141	107.644	112.96	93.506	112.604	70.2513	68.0726	-0.762386	0.762386	-0.389736	0.389736	-1.49858	1.49858	0.25474	-0.25474	0.0599664	1
806	OG0004162	243.859	250.172	129.336	101.957	61.8188	35.3431	148.398	132.136	134.373	142.99	0.82452	-0.82452	1.898	-1.898	0.403759	-0.403759	-0.216394	0.216394	0.0600685	1
561	OG0003591	255.922	315.951	492.008	484.469	270.115	406.407	399.969	697.183	355.932	355.047	0.0463139	-0.0463139	-1.20852	1.20852	-1.62505	1.62505	0.00746738	-0.00746738	0.0602489	1
300	OG0002986	100.659	80.403	146.884	144.372	170.278	170.045	376.476	274.352	90.2109	78.5176	0.0892502	-0.0892502	0.00709185	-0.00709185	1.62392	-1.62392	0.717223	-0.717223	0.0605015	1
318	OG0003024	322.291	323.26	184.931	148.167	199.479	134.172	201.904	195.905	123.058	126.059	1.03809	-1.03809	1.84098	-1.84098	0.141835	-0.141835	-0.1133	0.1133	0.0606603	1
844	OG0004256	307.364	285.385	225.843	220.113	151.8	84.7042	189.51	159.96	187.496	177.747	0.0909024	-0.0909024	2.00732	-2.00732	0.598269	-0.598269	0.188853	-0.188853	0.0606613	1
627	OG0003745	86.3637	71.7617	1398.15	1452.63	163.614	153.537	233.139	209.148	113.63	106.071	-0.342262	0.342262	0.569029	-0.569029	0.971514	-0.971514	0.61621	-0.61621	0.061909	1
839	OG0004248	371.822	734.56	701.3	714.097	1198.1	1416.9	518.494	1161.96	588.099	673.162	-0.0372048	0.0372048	-0.344303	0.344303	-1.5757	1.5757	-0.277529	0.277529	0.0621342	1
1460	OG0005657	120.339	238.873	288.673	279.469	327.678	375.22	214.205	383.623	274.404	319.835	0.0768723	-0.0768723	-0.320924	0.320924	-1.34464	1.34464	-0.362748	0.362748	0.0625923	1
125	OG0002330	129.868	127.244	168.405	113.465	155.238	130.569	181.741	188.599	148.675	139.387	1.90867	-1.90867	0.845231	-0.845231	-0.181316	0.181316	0.315749	-0.315749	0.0626843	1
70	OG0001970	331.176	481.74	783.02	709.741	523.658	490.963	1000.09	931.414	754.85	784.996	0.524626	-0.524626	0.344381	-0.344381	0.379961	-0.379961	-0.209223	0.209223	0.0627259	1
735	OG0004020	242.897	322.273	666.658	651.55	553.026	604.025	351.531	529.987	465.109	523.293	0.0944598	-0.0944598	-0.363268	0.363268	-1.66849	1.66849	-0.485163	0.485163	0.0627848	1
251	OG0002879	1082.12	1471.79	1083.52	1233.44	682.735	659.424	514.193	785.252	1121.03	1240.08	-0.505213	0.505213	0.135599	-0.135599	-1.62862	1.62862	-0.393632	0.393632	0.0627948	1
514	OG0003453	238.776	124.918	369.14	442.099	569.24	248.58	397.934	104.868	179.793	150.912	-0.244837	0.244837	1.06741	-1.06741	1.58677	-1.58677	0.237746	-0.237746	0.0627999	1
1503	OG0006185	177.811	206.983	251.931	244.016	267.847	275.686	241.534	208.431	352.825	272.832	0.20244	-0.20244	-0.182942	0.182942	0.933162	-0.933162	1.62174	-1.62174	0.0631092	1
1235	OG0005142	380.395	416.945	278.757	271.658	117.959	189.432	25.5732	60.1484	954.59	976.177	0.0584436	-0.0584436	-1.05365	1.05365	-1.82775	1.82775	-0.0506655	0.0506655	0.0631974	1
113	OG0002250	109.229	99.0045	95.7699	105.216	114.392	112.649	184.84	308.34	75.752	87.1617	-0.370824	0.370824	0.0605493	-0.0605493	-1.97571	1.97571	-0.552561	0.552561	0.0632498	1
108	OG0002190	123.514	105.649	108.794	108.649	173.127	171.096	105.392	96.6479	49.528	48.3819	0.0156949	-0.0156949	0.138857	-0.138857	1.01865	-1.01865	0.275499	-0.275499	0.0632545	1
1027	OG0004653	202.902	198.677	115.936	107.673	299.909	285.235	251.062	152.49	100.739	94.005	0.312384	-0.312384	0.212012	-0.212012	2.06497	-2.06497	0.292331	-0.292331	0.0636149	1
1482	OG0005978	105.418	110.636	110.396	128.117	405.389	311.579	415.769	232.535	100.739	77.4371	-0.454595	0.454595	0.800544	-0.800544	1.72927	-1.72927	0.800166	-0.800166	0.0638514	1
715	OG0003969	57.7864	43.5221	118.196	130.183	77.0446	63.5985	91.2863	59.7902	52.3364	44.4813	-0.358944	0.358944	0.711105	-0.711105	1.55065	-1.55065	0.603471	-0.603471	0.0639025	1
270	OG0002924	389.603	439.215	401.402	379.021	892.329	822.929	457.127	409.325	512.347	533.232	0.624643	-0.624643	0.881281	-0.881281	1.20168	-1.20168	-0.435056	0.435056	0.064041	1
1011	OG0004613	294.66	231.896	506.28	463.258	259.464	250.948	310.209	183.902	168.32	155.234	0.325877	-0.325877	0.12253	-0.12253	1.87731	-1.87731	0.297023	-0.297023	0.0642444	1
1227	OG0005124	466.762	421.593	462.192	418.174	257.685	261.455	585.271	354.365	370.041	326.799	0.402684	-0.402684	-0.0584855	0.0584855	1.97913	-1.97913	0.499769	-0.499769	0.0645156	1
891	OG0004355	564.245	517.295	531.193	530.467	142.102	169.066	892.151	1096.72	351.731	347.386	0.0102483	-0.0102483	-1.29943	1.29943	-1.54238	1.54238	0.0931939	-0.0931939	0.0645196	1
698	OG0003930	1066.88	1270.45	494.196	506.783	363.543	335.125	311.965	210.289	336.799	299.842	-0.118496	0.118496	0.38332	-0.38332	1.8347	-1.8347	0.547061	-0.547061	0.0654359	1
775	OG0004103	112.721	97.0111	97.4911	82.4654	102.69	87.0446	76.303	64.422	135.159	148.031	1.04779	-1.04779	1.03476	-1.03476	1.05947	-1.05947	-0.570381	0.570381	0.0656252	1
268	OG0002919	1045.61	944.53	882.333	847.493	250.803	251.517	838.598	533.538	361.628	308.488	0.176339	-0.176339	-0.0124408	0.0124408	1.94652	-1.94652	0.694295	-0.694295	0.0656515	1
130	OG0002356	853.504	1098.68	873.589	875.04	80.02	66.1184	448.294	425.211	820.069	797.78	-0.010981	0.010981	1.25849	-1.25849	0.3496	-0.3496	0.182263	-0.182263	0.0664874	1
897	OG0004366	462.945	331.233	294.235	337.33	58.8185	81.0813	292.172	285.051	348.112	362.874	-0.600677	0.600677	-1.40088	1.40088	0.108609	-0.108609	-0.182776	0.182776	0.0666064	1
996	OG0004583	287.363	480.408	1339.72	1283.23	163.344	216.707	104.975	280.13	265.918	310.47	0.0839467	-0.0839467	-0.547253	0.547253	-1.77267	1.77267	-0.301262	0.301262	0.0666529	1
491	OG0003407	218.775	184.723	65.8814	154.735	244.297	265.955	65.9905	74.1087	138.929	154.516	-2.02897	2.02897	-0.213831	0.213831	-0.291918	0.291918	-0.267581	0.267581	0.0667142	1
1592	OG0006852	1694.59	2129.84	3685.48	3597.17	648.483	855.316	461.336	651.647	5375.97	5372.49	0.103934	-0.103934	-1.17887	1.17887	-1.46559	1.46559	0.0027751	-0.0027751	0.0670465	1
421	OG0003246	246.082	348.18	220.735	196.586	189.898	241.948	141.139	214.529	500.09	584.922	0.396022	-0.396022	-0.824852	0.824852	-1.41212	1.41212	-0.535059	0.535059	0.0674704	1
1432	OG0005606	323.872	247.843	198.215	160.924	131.102	136.378	234.368	137.649	275.192	255.722	0.704353	-0.704353	-0.13381	0.13381	1.76361	-1.76361	0.248762	-0.248762	0.0675744	1
262	OG0002911	119.71	131.234	217.475	206.462	119.926	89.1889	58.3153	59.9191	279.432	249.963	0.331272	-0.331272	1.87442	-1.87442	-0.17298	0.17298	0.709868	-0.709868	0.0676196	1
531	OG0003502	117.484	112.626	156.876	155.11	110.24	43.1899	145.314	123.785	197.236	166.22	0.0265152	-0.0265152	2.04679	-2.04679	0.374707	-0.374707	0.399696	-0.399696	0.0679733	1
114	OG0002254	818.253	769.767	1184.36	1255.26	378.511	342.619	320.751	215.119	601.614	515.947	-0.278536	0.278536	0.477025	-0.477025	1.8893	-1.8893	0.734691	-0.734691	0.0681174	1
1579	OG0006778	718.756	736.663	205.818	173.094	191.572	202.11	516.874	322.138	342.454	310.285	0.720651	-0.720651	-0.223348	0.223348	1.93678	-1.93678	0.411245	-0.411245	0.0682586	1
1580	OG0006781	307.044	290.037	187.445	164.95	695.894	909.689	522.932	815.423	910.125	1076.01	0.486869	-0.486869	-1.01561	1.01561	-1.66687	1.66687	-0.637046	0.637046	0.0683961	1
678	OG0003882	303.872	222.93	251.815	260.672	464.606	230.219	181.28	141.4	140.974	129.482	-0.0931863	0.0931863	1.8189	-1.8189	0.666387	-0.666387	0.229115	-0.229115	0.0684358	1
981	OG0004554	217.822	246.847	358.436	322.605	63.8809	23.6113	200.748	157.417	382.216	375.662	0.231102	-0.231102	2.02175	-2.02175	0.53142	-0.53142	0.037988	-0.037988	0.0685926	1
1349	OG0005404	210.205	197.012	240.864	259.765	67.4296	59.0548	476.319	295.26	95.24	79.7782	-0.303304	0.303304	0.531907	-0.531907	1.88512	-1.88512	0.709704	-0.709704	0.0687594	1
1328	OG0005350	126.302	109.334	217.472	217.999	258.504	257.166	42.5658	35.8801	176.837	163.477	-0.0217186	0.0217186	0.0465211	-0.0465211	1.52806	-1.52806	0.703867	-0.703867	0.0688554	1
208	OG0002784	184.165	164.454	216.794	209.18	164.971	207.44	127.866	188.501	145.06	148.751	0.164074	-0.164074	-1.04673	1.04673	-1.75921	1.75921	-0.115304	0.115304	0.0689392	1
723	OG0003983	257.195	236.88	213.621	208.622	265.157	231.67	259.801	257.619	190.794	187.29	0.312079	-0.312079	1.77651	-1.77651	0.111189	-0.111189	0.244329	-0.244329	0.0689943	1
1230	OG0005131	118.437	116.609	179.569	149.201	146.11	128.669	72.8356	74.4032	167.065	165.143	1.73407	-1.73407	1.19162	-1.19162	-0.199873	0.199873	0.108609	-0.108609	0.0692638	1
371	OG0003137	169.873	214.621	183.896	161.981	280.997	260.034	392.893	381.177	171.778	176.665	0.962849	-0.962849	0.588802	-0.588802	0.229999	-0.229999	-0.213124	0.213124	0.0693413	1
219	OG0002804	80.6514	86.0475	196.434	221.604	157.874	190.757	66.8701	124.471	102	97.0664	-0.394534	0.394534	-0.618055	0.618055	-1.97256	1.97256	0.16238	-0.16238	0.0698258	1
505	OG0003435	636.597	1182.33	493.221	404.904	1450.67	1049.84	3212.15	3080.89	1654.45	1737.83	0.586679	-0.586679	0.956358	-0.956358	0.124435	-0.124435	-0.146649	0.146649	0.070216	1
1220	OG0005109	1008.85	1010.64	942.9	880.727	1147.16	1014.09	937.426	985.723	600.985	545.661	0.813029	-0.813029	1.46833	-1.46833	-0.598886	0.598886	1.1506	-1.1506	0.0703365	1
985	OG0004560	360.629	515.807	981.721	975.434	792.905	1050.35	816.539	1050.5	720.901	705.576	0.0263875	-0.0263875	-1.14734	1.14734	-1.02939	1.02939	0.0882549	-0.0882549	0.0703952	1
58	OG0001920	62.2349	75.0873	115.676	107.285	273.29	288.601	315.619	282.115	108.596	96.8864	0.606824	-0.606824	-0.439388	0.439388	0.903806	-0.903806	0.918857	-0.918857	0.0705273	1
347	OG0003078	931.301	1143.54	492.202	1254.44	86.7117	117.036	1054.65	1134.95	902.039	893.685	-1.95414	1.95414	-0.666454	0.666454	-0.16421	0.16421	0.0208331	-0.0208331	0.0706726	1
721	OG0003981	606.136	481.029	650.577	641.057	96.1771	97.9889	278.486	229.796	730.579	657.387	0.0982195	-0.0982195	-0.124342	0.124342	1.27652	-1.27652	0.702716	-0.702716	0.0712285	1
1473	OG0005871	60.0154	53.8212	100.075	107.132	230.005	209.55	228.865	199.787	162.034	139.927	-0.566799	0.566799	0.774453	-0.774453	1.12892	-1.12892	1.21839	-1.21839	0.0714111	1
1506	OG0006207	126.054	134.221	76.4065	152.324	1254.68	1442.62	219.616	226.925	148.988	160.277	-2.05312	2.05312	-0.431021	0.431021	-0.101244	0.101244	-0.225798	0.225798	0.0717264	1
79	OG0002005	274.243	400.018	656.434	624.776	395.67	556.562	71.3891	190.815	258.374	285.979	0.10014	-0.10014	-0.684762	0.684762	-1.84589	1.84589	-0.205518	0.205518	0.071968	1
99	OG0002149	294.025	328.904	202.867	211.288	53.3436	146.06	89.8531	117.198	270.117	284.666	-0.0884281	0.0884281	-2.02235	2.02235	-0.574429	0.574429	-0.114061	0.114061	0.0724325	1
988	OG0004563	327.051	232.229	325.061	362.097	339.466	295.496	422.536	342.948	156.533	118.498	-0.443767	0.443767	0.570163	-0.570163	0.85605	-0.85605	1.13864	-1.13864	0.072562	1
908	OG0004399	132.411	93.3599	149.747	143.188	10.5554	73.7587	39.0304	81.5459	118.814	123.896	0.0560861	-0.0560861	-1.87781	1.87781	-0.883281	0.883281	-0.0524454	0.0524454	0.0725789	1
144	OG0002436	379.128	402.277	313.307	308.739	497.215	491.531	162.18	119.741	243.599	222.406	0.0971963	-0.0971963	0.0760811	-0.0760811	1.99219	-1.99219	0.601855	-0.601855	0.0727178	1
1476	OG0005933	86.3668	95.6822	145.812	133.282	47.6965	49.5232	97.8997	79.3279	109.542	103.91	0.737733	-0.737733	-0.30876	0.30876	1.72202	-1.72202	0.433593	-0.433593	0.0728052	1
1501	OG0006170	951.305	1012.97	181.19	128.571	347.164	305.548	263.55	235.472	368.232	394.029	1.84327	-1.84327	0.691853	-0.691853	0.610559	-0.610559	-0.367229	0.367229	0.0728346	1
497	OG0003422	142.251	149.171	256.741	273.997	153.267	140.056	143.588	119.154	137.042	122.46	-0.554804	0.554804	0.768516	-0.768516	1.58685	-1.58685	0.958804	-0.958804	0.0733711	1
733	OG0004017	219.404	201.331	237.518	82.6807	122.316	103.717	304.196	257.911	144.746	141.728	2.0543	-2.0543	0.349565	-0.349565	0.349808	-0.349808	0.0447576	-0.0447576	0.073689	1
1609	OG0007052	160.985	171.427	133.12	119.24	269.326	287.396	250.181	184.638	270.317	242.036	0.664478	-0.664478	-0.392107	0.392107	1.821	-1.821	0.666826	-0.666826	0.0741617	1
605	OG0003693	408.341	324.917	250.58	320.038	58.0956	74.3313	107.519	102.16	108.13	110.933	-1.23651	1.23651	-1.24542	1.24542	0.259626	-0.259626	-0.129963	0.129963	0.074208	1
788	OG0004128	442.633	406.314	132.804	96.6354	61.3474	68.6598	111.774	80.3717	98.6976	88.9626	1.37387	-1.37387	-0.490205	0.490205	1.42434	-1.42434	0.452118	-0.452118	0.0743974	1
557	OG0003581	132.411	182.065	121.131	96.3809	356.145	350.24	251.061	130.799	228.354	225.828	0.651746	-0.651746	0.0478748	-0.0478748	1.80389	-1.80389	0.0318611	-0.0318611	0.0745267	1
1248	OG0005169	80.0163	139.537	188.006	179.479	484.779	580.419	235.57	431.082	157.948	175.404	0.119086	-0.119086	-0.460803	0.460803	-1.50514	1.50514	-0.268754	0.268754	0.0745573	1
381	OG0003153	374.991	367.117	243.275	257.759	829.328	748.941	627.731	540.191	596.745	552.322	-0.594081	0.594081	1.04672	-1.04672	1.54036	-1.54036	0.794483	-0.794483	0.074601	1
922	OG0004429	205.753	374.091	251.712	231.588	84.7765	155.979	227.753	387.83	641.691	653.353	0.179853	-0.179853	-1.27747	1.27747	-1.12324	1.12324	-0.0388943	0.0388943	0.0746885	1
1500	OG0006147	127.645	187.378	179.171	158.506	134.057	135.882	204.772	106.596	173.701	153.489	0.343318	-0.343318	-0.037939	0.037939	1.7689	-1.7689	0.346565	-0.346565	0.0751987	1
979	OG0004549	321.653	432.234	375.959	362.962	436.992	499.72	233.303	447.156	395.89	455.8	0.103477	-0.103477	-0.393956	0.393956	-1.84885	1.84885	-0.41381	0.41381	0.0756599	1
1484	OG0005992	147.649	185.052	343.155	319.809	640.989	687.669	865.513	1031.52	281.948	340.003	0.421002	-0.421002	-0.420027	0.420027	-1.0462	1.0462	-1.11595	1.11595	0.0758593	1
708	OG0003957	64.1401	83.7219	116.5	119.651	61.8709	86.3567	99.0484	246.49	85.8103	85.3608	-0.0593872	0.0593872	-0.735356	0.735356	-1.89948	1.89948	0.0116895	-0.0116895	0.075982	1
420	OG0003244	236.877	341.861	378.395	343.346	420.413	398.629	289.268	263.556	239.986	250.86	0.524153	-0.524153	0.287074	-0.287074	0.502008	-0.502008	-0.239116	0.239116	0.0761539	1
629	OG0003748	285.452	326.246	361.126	390.669	42.727	54.4259	436.178	440.868	377.817	379.08	-0.581875	0.581875	-1.78307	1.78307	-0.0791946	0.0791946	-0.0247024	0.0247024	0.0764093	1
925	OG0004433	92.3998	88.7054	87.7028	88.9093	209.545	267.121	194.32	213.714	114.098	113.096	-0.110072	0.110072	-1.94632	1.94632	-0.765906	0.765906	0.0710621	-0.0710621	0.077075	1
1581	OG0006785	407.639	414.63	112.355	104.293	390.34	428.031	278.068	158.297	87.2248	63.7505	0.24587	-0.24587	-0.30429	0.30429	1.81343	-1.81343	1.02727	-1.02727	0.0773079	1
405	OG0003208	159.08	307.931	199.14	172.699	51.1183	83.4344	55.2151	116.209	572.842	632.147	0.278499	-0.278499	-0.940673	0.940673	-1.39357	1.39357	-0.192763	0.192763	0.0776253	1
1283	OG0005242	144.791	135.885	123.432	94.9649	279.007	296.793	40.1398	38.2942	117.714	97.7868	1.65081	-1.65081	-0.391207	0.391207	0.298016	-0.298016	1.17111	-1.17111	0.0779125	1
1542	OG0006463	130.185	144.52	24.3548	129.054	170.863	184.203	166.85	246.985	113.314	117.236	-2.03186	2.03186	-0.111853	0.111853	-0.57649	0.57649	-0.0506517	0.0506517	0.0780177	1
1435	OG0005612	123.841	291.033	146.524	120.613	431.236	695.312	219.198	854.435	999.546	1298.96	0.267008	-0.267008	-0.645304	0.645304	-1.62879	1.62879	-0.358602	0.358602	0.0784261	1
1157	OG0004971	311.181	478.747	446.23	421.404	39.6814	55.3856	574.581	823.249	1006.78	1017.31	0.187517	-0.187517	-1.08257	1.08257	-1.16583	1.16583	-0.0340992	0.0340992	0.0787061	1
671	OG0003866	627.109	698.351	93.9107	61.8319	1075.52	752.715	1538.23	1418.61	451.684	506.222	1.53176	-1.53176	1.31307	-1.31307	0.300859	-0.300859	-0.423404	0.423404	0.0789399	1
59	OG0001923	865.574	709.643	998.034	1053.5	277.822	251.995	203.291	122.155	295.778	253.021	-0.201351	0.201351	0.363047	-0.363047	1.85673	-1.85673	0.580248	-0.580248	0.079014	1
1107	OG0004842	629.97	811.638	628.875	692.008	778.982	818.888	117.044	216.422	1004.19	1057.63	-0.308132	0.308132	-0.161006	0.161006	-1.92125	1.92125	-0.16712	0.16712	0.0794277	1
214	OG0002797	219.721	203.65	396.298	419.698	64.9324	48.2516	380.176	345.885	190.164	172.521	-0.359829	0.359829	1.84928	-1.84928	0.592638	-0.592638	0.610416	-0.610416	0.080236	1
32	OG0001538	1276.45	1660.15	607.583	564.119	189.492	151.454	1036.85	935.524	1887.83	1999.68	0.424509	-0.424509	1.27673	-1.27673	0.587893	-0.587893	-0.32926	0.32926	0.0802547	1
930	OG0004443	219.727	209.969	204.598	167.551	54.5424	51.2045	396.824	397.519	164.391	162.438	1.97278	-1.97278	0.625524	-0.625524	-0.017331	0.017331	0.118448	-0.118448	0.0803469	1
38	OG0001644	2394.46	2628.95	2691.35	2876.03	330.746	336.544	1056.6	1546.72	3497.79	3642.93	-0.355338	0.355338	-0.0930701	0.0930701	-2.01683	2.01683	-0.217737	0.217737	0.0805699	1
1393	OG0005509	384.517	438.211	0	198.589	326.574	394.486	911.619	2209.03	1278.5	1066.11	-1.9412	1.9412	-0.182827	0.182827	-0.807055	0.807055	0.175849	-0.175849	0.0806605	1
457	OG0003309	293.711	254.156	348.059	367.902	1132.91	724.352	441.311	400.911	318.726	278.235	-0.237517	0.237517	1.88518	-1.88518	0.41108	-0.41108	0.581276	-0.581276	0.0806804	1
116	OG0002267	546.769	667.779	412.545	412.634	478.373	481.887	396.453	449.221	449.487	466.605	-0.00192073	0.00192073	-0.0651924	0.0651924	-1.11144	1.11144	-0.332837	0.332837	0.0808216	1
281	OG0002953	317.166	332.423	324.4	389.847	826.078	1071.76	352.938	439.784	774.334	678.745	-0.948069	0.948069	-1.3394	1.3394	-1.13351	1.13351	0.680644	-0.680644	0.0809057	1
1316	OG0005318	177.814	300.668	250.658	299.955	2105.65	3090.41	225.997	821.163	92.5683	82.6595	-0.287602	0.287602	-0.6088	0.6088	-1.82575	1.82575	0.181649	-0.181649	0.0810569	1
78	OG0002002	234.654	294.691	316.16	306.06	217.057	191.632	1135.86	993.487	244.229	255	0.232513	-0.232513	0.891107	-0.891107	0.957695	-0.957695	-0.309032	0.309032	0.0812657	1
939	OG0004458	290.523	273.442	211.145	230.205	100.46	76.5258	242.275	205.235	278.333	253.203	-0.527553	0.527553	1.65195	-1.65195	1.01108	-1.01108	0.577546	-0.577546	0.0813826	1
799	OG0004152	177.814	263.458	307.378	306.249	388.384	354.789	277.236	270.046	367.916	367.194	0.0195454	-0.0195454	0.480139	-0.480139	0.139521	-0.139521	0.0104291	-0.0104291	0.0816483	1
887	OG0004342	220.991	231.564	434.175	356.518	1348.85	1338.49	366.58	296.238	729.704	758.24	1.40988	-1.40988	0.0553152	-0.0553152	1.52345	-1.52345	-0.275311	0.275311	0.0824755	1
1307	OG0005300	221.315	283.392	368.56	376.966	189.075	314.527	1334.85	1602.47	221.598	218.083	-0.081711	0.081711	-1.80537	1.80537	-0.660309	0.660309	0.0579474	-0.0579474	0.0831452	1
732	OG0004016	341.34	295.02	393.906	293.502	158.288	152.728	562.564	396.475	281.948	304.888	1.28135	-1.28135	0.156834	-0.156834	1.51928	-1.51928	-0.342925	0.342925	0.0834014	1
1455	OG0005647	799.849	769.451	754.471	815.049	87.0063	54.6496	321.538	190.002	468.975	469.123	-0.236197	0.236197	1.39784	-1.39784	1.5736	-1.5736	-0.000960449	0.000960449	0.0838731	1
1559	OG0006588	86.0493	99.669	189.941	196.315	209.595	195.049	420.269	295.359	117.557	107.692	-0.176527	0.176527	0.384528	-0.384528	1.86711	-1.86711	0.468506	-0.468506	0.084004	1
1421	OG0005582	309.593	192.697	272.185	296.686	197.047	178.964	156.584	100.268	108.443	89.6847	-0.268991	0.268991	0.300359	-0.300359	1.36935	-1.36935	0.591313	-0.591313	0.0844206	1
1646	OG0007976	667.755	250.84	435.059	502.244	198.736	129.738	422.306	183.641	149.148	133.622	-0.236491	0.236491	0.693034	-0.693034	1.2995	-1.2995	0.181153	-0.181153	0.0844228	1
156	OG0002491	2215.06	903.998	288.777	362.003	956.718	407.767	974.002	291.934	1330.22	1196.85	-0.297372	0.297372	1.06325	-1.06325	1.42392	-1.42392	0.139474	-0.139474	0.0845369	1
1162	OG0004983	251.801	274.419	344.378	314.798	246.539	233.668	230.621	133.995	126.828	124.258	0.347799	-0.347799	0.207733	-0.207733	2.05393	-2.05393	0.0793404	-0.0793404	0.086296	1
795	OG0004145	956.703	214.621	986.198	910.131	1140.52	550.51	769.866	764.041	433.295	379.982	0.11699	-0.11699	1.01759	-1.01759	0.0110747	-0.0110747	0.191189	-0.191189	0.0864677	1
1024	OG0004645	281.01	272.761	102.95	88.5537	203.637	206.31	795.989	665.608	231.059	234.692	1.35095	-1.35095	-0.117175	0.117175	1.60309	-1.60309	-0.140167	0.140167	0.0869319	1
314	OG0003015	1005.6	970.111	1365.9	1364.85	463.31	326.469	359.644	340.991	1002.06	949.955	0.00457903	-0.00457903	2.06226	-2.06226	0.316868	-0.316868	0.31774	-0.31774	0.0874177	1
762	OG0004075	179.408	184.059	90.8162	116.479	56.0652	77.0256	485.106	425.931	127.931	146.05	-1.18779	1.18779	-1.51101	1.51101	0.623185	-0.623185	-0.634486	0.634486	0.0875133	1
1641	OG0007833	307.275	335.227	805.228	943.407	436.223	210.322	1379.71	519.021	194.254	188.192	-0.289214	0.289214	1.27877	-1.27877	1.65903	-1.65903	0.0580091	-0.0580091	0.0875743	1
1310	OG0005305	255.287	225.584	347.701	364.447	389.028	353.854	576.575	547.955	230.401	209.982	-0.514269	0.514269	1.03554	-1.03554	0.556637	-0.556637	1.01405	-1.01405	0.0877186	1
881	OG0004331	270.103	483.64	223.871	39.988	3018.49	3147.49	1109.03	744.663	377.345	338.022	1.8959	-1.8959	-0.0569168	0.0569168	0.534744	-0.534744	0.149545	-0.149545	0.0884877	1
1134	OG0004918	905.579	899.682	1627.55	1551.96	1651.56	1351.21	975.99	883.462	994.325	1044.32	0.43153	-0.43153	1.81557	-1.81557	0.903217	-0.903217	-0.445149	0.445149	0.0888168	1
471	OG0003352	199.088	199.002	192.527	194.879	172.093	170.676	370.973	246.496	162.347	139.747	-0.05986	0.05986	0.0407768	-0.0407768	1.98763	-1.98763	0.737606	-0.737606	0.0888281	1
253	OG0002886	906.464	803.441	932.993	1029.05	186.809	119.579	886.878	667.827	542.68	512.158	-0.379561	0.379561	1.70122	-1.70122	1.09237	-1.09237	0.224334	-0.224334	0.0890475	1
980	OG0004550	114.309	100.001	135.788	143.198	72.2926	76.3834	187.152	88.2979	124.472	71.6743	-0.123777	0.123777	-0.128237	0.128237	1.6726	-1.6726	1.25452	-1.25452	0.0891082	1
1630	OG0007641	92.7205	105.31	122.285	137.028	132.609	95.1147	108.906	56.6416	77.6379	71.858	-0.327585	0.327585	0.948668	-0.948668	1.81904	-1.81904	0.222767	-0.222767	0.0892414	1
494	OG0003410	215.6	255.485	227.451	228.531	77.5681	50.3754	294.901	240.657	205.253	209.979	-0.0200606	0.0200606	1.80007	-1.80007	0.857826	-0.857826	-0.0963836	0.0963836	0.0897241	1
142	OG0002417	785.24	714.962	792.48	854.019	581.189	485.957	432.108	404.955	954.601	808.232	-0.567756	0.567756	1.3556	-1.3556	0.49276	-0.49276	1.26127	-1.26127	0.0900672	1
328	OG0003045	1028.78	1031.58	758.901	752.12	257.441	258.405	254.807	263.751	729.787	752.811	0.400793	-0.400793	-0.166914	0.166914	-1.54047	1.54047	-1.38701	1.38701	0.0901017	1
344	OG0003075	213.526	309.97	1384.22	1384.7	70.7018	87.5933	470.816	1042.58	662.123	682.166	-0.000848347	0.000848347	-0.521673	0.521673	-1.84698	1.84698	-0.0728933	0.0728933	0.0901623	1
968	OG0004519	149.554	123.583	116.773	131.85	102.733	88.867	118.71	56.7884	86.4405	66.9939	-0.323109	0.323109	0.385593	-0.385593	1.87995	-1.87995	0.675303	-0.675303	0.0904555	1
1522	OG0006340	137.806	108.307	167.561	157.684	379.734	372.209	419.991	360.138	89.7378	91.6675	0.440485	-0.440485	0.145173	-0.145173	1.11286	-1.11286	-0.154295	0.154295	0.0905597	1
582	OG0003637	66.0484	73.0906	124.922	89.8816	242.822	176.218	138.502	165.733	158.106	128.045	1.27655	-1.27655	1.24382	-1.24382	-0.700444	0.700444	0.822105	-0.822105	0.0914692	1
1487	OG0006004	192.103	414.623	499.639	399.129	91.1646	234.033	127.404	172.975	89.5806	123.539	0.380637	-0.380637	-1.49534	1.49534	-0.516378	0.516378	-0.542342	0.542342	0.091656	1
178	OG0002612	226.719	279.405	4504.6	4327.83	963.582	1284.59	882.017	1436.86	820.854	807.867	0.142356	-0.142356	-1.01564	1.01564	-1.70198	1.70198	0.0567215	-0.0567215	0.0917441	1
991	OG0004577	315.299	296.685	467.396	456.054	347.601	338.861	411.667	291.413	216.413	206.382	0.147849	-0.147849	0.153276	-0.153276	2.05889	-2.05889	0.285594	-0.285594	0.0920072	1
1588	OG0006830	113.353	162.796	97.118	103.781	151.676	125.518	136.146	115.567	101.684	97.0682	-0.316904	0.316904	0.901718	-0.901718	0.7812	-0.7812	0.221897	-0.221897	0.0920364	1
941	OG0004462	341.975	390.702	151.38	162.063	489.646	435.295	180.367	166.363	147.734	130.382	-0.599145	0.599145	1.033	-1.033	0.710023	-0.710023	1.09676	-1.09676	0.092106	1
151	OG0002468	470.89	472.431	162.937	144.63	50.3569	33.6981	118.617	121.112	487.433	472.406	0.607634	-0.607634	2.02328	-2.02328	-0.10624	0.10624	0.159825	-0.159825	0.0922191	1
932	OG0004446	796.671	1378.09	1270.26	1085.1	578.803	735.726	323.99	466.931	2646.42	3188.68	0.456912	-0.456912	-0.693846	0.693846	-1.05044	1.05044	-0.540138	0.540138	0.0922208	1
424	OG0003251	77.7968	94.3533	98.1401	124.382	221.843	223.719	105.299	138.465	133.745	126.42	-1.21377	1.21377	-0.0433414	0.0433414	-1.40038	1.40038	0.289755	-0.289755	0.0934175	1
995	OG0004582	822.073	1078.08	585.775	638.724	105.803	105.538	154.642	286.226	816.141	889.806	-0.275366	0.275366	0.00800419	-0.00800419	-1.90063	1.90063	-0.274978	0.274978	0.0943609	1
26	OG0001448	409.023	432.025	545.957	589.979	443.069	612.578	219.153	214.499	242.79	253.311	-0.486133	0.486133	-2.01422	2.01422	0.134635	-0.134635	-0.266029	0.266029	0.0950613	1
1058	OG0004727	235.924	442.201	264.501	234.166	344.68	452.959	397.009	912.007	743.121	849.357	0.246574	-0.246574	-0.550244	0.550244	-1.5947	1.5947	-0.270406	0.270406	0.0953279	1
86	OG0002031	249.892	274.09	259.657	272.053	136.396	111.024	294.346	281.791	136.886	124.98	-0.394277	0.394277	1.73422	-1.73422	0.368535	-0.368535	0.76895	-0.76895	0.0954299	1
1653	OG0009031	66.0452	95.6789	95.1303	101.862	212.561	215.957	516.892	556.709	158.417	154.334	-0.380223	0.380223	-0.0881862	0.0881862	-0.412635	0.412635	0.145275	-0.145275	0.0958101	1
101	OG0002161	372.454	247.176	470.557	579.274	356.002	329.703	149	283.452	465.167	503.339	-0.564785	0.564785	0.209168	-0.209168	-1.69564	1.69564	-0.214952	0.214952	0.0973581	1
451	OG0003298	508.361	497.341	465.383	528.774	387.09	307.363	636.603	456.884	422.138	376.558	-0.619744	0.619744	1.11585	-1.11585	1.59743	-1.59743	0.554669	-0.554669	0.0975538	1
393	OG0003184	1278.67	962.802	1142.9	910.519	126.461	43.7735	460.641	75.6094	111.112	166.038	0.264561	-0.264561	1.13551	-1.13551	1.67852	-1.67852	-0.463299	0.463299	0.0982341	1
551	OG0003569	150.507	152.161	154.208	161.727	174.572	169.683	223.777	184.359	121.327	108.23	-0.436417	0.436417	0.26044	-0.26044	1.77115	-1.77115	1.04628	-1.04628	0.0987313	1
1353	OG0005408	367.373	388.373	656.268	702.292	754.012	571.473	479.927	186.479	302.07	282.375	-0.154654	0.154654	0.62869	-0.62869	2.01024	-2.01024	0.153836	-0.153836	0.0989896	1
847	OG0004261	781.242	761.76	805.112	934.641	105.921	630.876	785.972	918.496	925.213	989.93	-0.218911	0.218911	-2.09489	2.09489	-0.22861	0.22861	-0.0993586	0.0993586	0.0991003	1
499	OG0003424	117.802	110.965	206.627	208.266	131.045	129.969	528.483	310.2	111.113	95.0855	-0.0306724	0.0306724	0.031993	-0.031993	2.01997	-2.01997	0.603272	-0.603272	0.0993946	1
1156	OG0004970	704.271	613.293	208.893	226.482	294.663	228.133	152.929	81.7417	322.34	307.765	-0.252546	0.252546	0.795539	-0.795539	1.89634	-1.89634	0.144598	-0.144598	0.0996024	1
379	OG0003149	349.913	229.239	319.904	341.767	109.622	63.64	296.474	185.695	132.017	138.126	-0.170893	0.170893	1.37256	-1.37256	1.18824	-1.18824	-0.116949	0.116949	0.0996584	1
1459	OG0005655	527.336	802.235	315.176	285.616	249.351	305.143	213.512	376.772	688.367	757.621	0.285036	-0.285036	-0.5829	0.5829	-1.60228	1.60228	-0.277458	0.277458	0.099719	1
838	OG0004243	201.311	182.394	569.581	600.763	928.154	979.43	2014.6	1952.68	439.896	455.436	-0.851298	0.851298	-0.858872	0.858872	0.498701	-0.498701	-0.55459	0.55459	0.099988	1
865	OG0004288	185.435	173.424	81.4417	121.468	365.537	407.245	294.717	287.366	130.601	135.065	-2.00895	2.00895	-0.549644	0.549644	0.128604	-0.128604	-0.171095	0.171095	0.100237	1
465	OG0003333	285.138	226.913	333.511	302.536	183.147	183.455	397.841	333.262	236.055	240.955	0.678088	-0.678088	-0.0116882	0.0116882	1.22995	-1.22995	-0.14303	0.14303	0.100379	1
231	OG0002829	453.112	452.5	235.772	249.432	884.104	591.199	688.126	433.17	319.353	333.159	-0.196515	0.196515	1.38584	-1.38584	1.58713	-1.58713	-0.147696	0.147696	0.101335	1
537	OG0003532	149.24	96.6789	10.0767	118.567	146.844	312.711	144.33	136.572	130.601	120.838	-1.89692	1.89692	-0.811836	0.811836	0.0621255	-0.0621255	0.0873423	-0.0873423	0.101521	1
1247	OG0005168	1151.98	1212.31	241.4	239.174	2801.79	3215.92	1376.38	2434.07	1618.61	1660.22	0.034181	-0.034181	-0.507896	0.507896	-2.04857	2.04857	-0.0936483	0.0936483	0.101749	1
1183	OG0005023	185.749	171.102	517.805	568.964	212.867	199.966	324.452	250.9	204.937	166.762	-0.560261	0.560261	0.371913	-0.371913	1.5215	-1.5215	1.22237	-1.22237	0.101783	1
445	OG0003287	267.674	264.787	204.441	212.139	141.009	128.83	116.998	97.6114	227.256	222.408	-0.379227	0.379227	0.926311	-0.926311	1.85386	-1.85386	0.221247	-0.221247	0.101832	1
515	OG0003456	711.895	601.004	393.216	441.855	142.988	196.132	433.219	426.026	710.216	710.44	-0.658978	0.658978	-1.77302	1.77302	0.0947114	-0.0947114	-0.00178646	0.00178646	0.102818	1
783	OG0004114	143.204	135.55	295.367	323.48	460.833	440.332	286.858	309.612	164.707	172.162	-1.32616	1.32616	0.66414	-0.66414	-1.11367	1.11367	-0.646073	0.646073	0.103541	1
950	OG0004484	229.574	206.976	400.239	377.204	113.451	112.393	245.973	150.239	129.973	123.539	0.251201	-0.251201	0.039732	-0.039732	2.04852	-2.04852	0.21516	-0.21516	0.104323	1
842	OG0004253	662.675	871.778	845.456	931.44	966.587	958.041	663.994	981.582	1434.26	1457.08	-0.42535	0.42535	0.0390319	-0.0390319	-1.69644	1.69644	-0.0693781	0.0693781	0.104913	1
30	OG0001494	1346.38	1309.09	1180.76	1172.85	482.83	509.538	1048.91	798.842	1073.26	891.967	0.0427993	-0.0427993	-0.34267	0.34267	1.72313	-1.72313	1.17456	-1.17456	0.105007	1
1463	OG0005801	73.6658	103.988	158.083	172.327	391.579	334.989	315.85	261.891	265.445	246.716	-0.421307	0.421307	0.761177	-0.761177	0.91274	-0.91274	0.357365	-0.357365	0.105218	1
1400	OG0005523	473.081	550.007	276.484	254.192	2188.84	2765.92	710.778	1024.15	943.126	970.843	0.3841	-0.3841	-1.06501	1.06501	-1.65165	1.65165	-0.132418	0.132418	0.105257	1
1301	OG0005285	1515.23	1980.76	2160.92	2167.93	477.638	616.229	552.439	665.557	1867.55	1774.03	-0.0165473	0.0165473	-1.29502	1.29502	-0.949282	0.949282	0.262504	-0.262504	0.105305	1
235	OG0002838	95.8926	109.968	235.819	223.653	290.643	397.623	269.513	353.745	147.261	144.609	0.256681	-0.256681	-1.50681	1.50681	-1.31016	1.31016	0.0880639	-0.0880639	0.105789	1
944	OG0004465	330.861	325.582	201.924	117.364	241.748	245.551	243.894	211.008	283.364	279.135	2.04398	-2.04398	-0.0602331	0.0602331	0.557931	-0.557931	0.0580224	-0.0580224	0.106086	1
1018	OG0004631	145.744	151.829	112.857	120.975	93.9224	58.189	133.74	108.307	124.629	121.378	-0.28238	0.28238	1.91068	-1.91068	0.854614	-0.854614	0.107491	-0.107491	0.106503	1
858	OG0004281	228.932	164.122	86.4895	94.5244	212.763	205.287	324.729	209.507	114.728	90.7634	-0.314583	0.314583	0.126723	-0.126723	1.5285	-1.5285	0.826496	-0.826496	0.106805	1
443	OG0003283	72.3957	90.7021	149.201	148.95	171.239	176.365	162.364	117.525	124.317	108.774	0.00862356	-0.00862356	-0.151001	0.151001	1.64025	-1.64025	0.682713	-0.682713	0.107225	1
205	OG0002778	416.279	352.493	418.267	438.664	142.623	139.572	434.329	261.859	336.012	281.657	-0.182338	0.182338	0.0828226	-0.0828226	1.89775	-1.89775	0.674124	-0.674124	0.107711	1
1269	OG0005206	329.588	353.486	469.723	517.188	95.0169	80.4877	456.202	328.76	312.659	290.421	-0.522623	0.522623	0.899589	-0.899589	1.76423	-1.76423	0.40069	-0.40069	0.109053	1
769	OG0004090	443.9	416.952	451.801	369.465	469.53	494.031	463.928	322.366	328.625	329.92	1.0128	-1.0128	-0.25687	0.25687	1.81875	-1.81875	-0.0198561	0.0198561	0.109058	1
11	OG0001206	154	244.182	444.07	398.607	69.9472	100.055	90.5463	184.553	631	641.823	0.254377	-0.254377	-0.835032	0.835032	-1.61122	1.61122	-0.0400952	0.0400952	0.109153	1
382	OG0003154	162.255	148.171	236.092	214.364	382.517	378.1	312.972	138.855	88.1693	82.1175	0.260581	-0.260581	0.0313741	-0.0313741	2.08187	-2.08187	0.191995	-0.191995	0.109158	1
1075	OG0004781	1223.73	1956.83	6487.89	6078.54	1693.49	1931.97	605.017	1047.4	2975.39	3225.88	0.190322	-0.190322	-0.384337	0.384337	-1.56421	1.56421	-0.236007	0.236007	0.109519	1
223	OG0002813	1155.16	1559.15	967.948	1078.35	242.453	231.798	1059.51	1729.28	1900.71	2023.81	-0.394335	0.394335	0.164208	-0.164208	-1.75541	1.75541	-0.229257	0.229257	0.109725	1
1563	OG0006616	110.81	128.576	299.076	288.526	200.007	193.277	260.727	198.45	100.426	101.027	0.243198	-0.243198	0.231769	-0.231769	1.8371	-1.8371	-0.0403538	0.0403538	0.109743	1
556	OG0003579	689.979	570.442	827.306	856.097	273.29	248.545	204.031	161.004	603.346	593.746	-0.227225	0.227225	0.629995	-0.629995	1.56604	-1.56604	0.106542	-0.106542	0.109751	1
305	OG0002997	600.761	486.713	107.185	173.668	102.461	129.068	785.234	793.667	283.048	264.185	-1.75944	1.75944	-0.854145	0.854145	-0.039701	0.039701	0.256212	-0.256212	0.110165	1
1499	OG0006128	91.4472	80.7319	107.348	123.233	110.558	102.829	124.167	146.455	91.7825	96.7063	-1.10798	1.10798	0.582548	-0.582548	-1.32463	1.32463	-0.420138	0.420138	0.110611	1
338	OG0003062	770.313	725.587	524.947	614.587	277.262	212.102	235.34	195.665	575.214	463.18	-0.787281	0.787281	1.33263	-1.33263	0.921284	-0.921284	1.0798	-1.0798	0.111086	1
275	OG0002939	338.488	401.995	760.531	820.491	707.555	551.06	475.948	401.497	316.753	305.451	-0.45126	0.45126	1.4795	-1.4795	1.00962	-1.00962	0.216134	-0.216134	0.111284	1
1313	OG0005314	309.905	374.749	295.276	308.869	243.028	200.746	623.607	572.777	294.681	285.8	-0.332592	0.332592	1.40843	-1.40843	0.628049	-0.628049	0.226162	-0.226162	0.111642	1
206	OG0002779	117.17	114.294	3683.26	3305.44	415.824	438.949	117.739	113.74	62.7075	48.4414	0.799388	-0.799388	-0.400034	0.400034	0.255485	-0.255485	1.89787	-1.89787	0.112829	1
946	OG0004473	221.001	219.936	349.388	321.424	430.783	410.163	424.804	233.024	153.077	153.435	0.299224	-0.299224	0.176004	-0.176004	2.09263	-2.09263	-0.00838563	0.00838563	0.113325	1
1274	OG0005221	534.395	508.308	670.007	604.257	68.3451	77.9769	141.832	215.15	375.145	419.603	0.475752	-0.475752	-0.606939	0.606939	-1.89369	1.89369	-0.515775	0.515775	0.113998	1
843	OG0004255	238.779	252.162	375.063	397.906	58.7437	98.838	140.583	143.488	67.2652	69.3332	-0.242761	0.242761	-2.09007	2.09007	-0.0840067	0.0840067	-0.124358	0.124358	0.114057	1
5	OG0000981	1051.95	617.619	276.603	299.796	227.447	94.995	1086.28	579.072	488.3	544.404	-0.147751	0.147751	1.50836	-1.50836	1.11836	-1.11836	-0.199488	0.199488	0.114507	1
1534	OG0006418	117.484	107.958	195.299	229.428	15.985	69.2534	224.285	248.161	153.549	155.052	-0.269064	0.269064	-2.09253	2.09253	-0.169218	0.169218	-0.0163163	0.0163163	0.114536	1
411	OG0003220	432.472	529.242	437.599	462.279	266.72	268.768	173.879	271.808	749.817	774.462	-0.238654	0.238654	-0.0332814	0.0332814	-1.91194	1.91194	-0.14069	0.14069	0.114664	1
388	OG0003172	126.375	109.307	168.561	116.189	383.306	477.393	247.963	149.85	62.0789	52.4087	1.1311	-1.1311	-0.672264	0.672264	1.51674	-1.51674	0.519445	-0.519445	0.114701	1
820	OG0004200	1215.02	1656.73	1026.57	962.981	3655.87	3920	2309.62	2976.26	1900.32	2058.2	0.325492	-0.325492	-0.355041	0.355041	-1.28434	1.28434	-0.406171	0.406171	0.114933	1
1164	OG0004987	1188.18	721.603	116.165	119.354	845.705	802.738	1081.84	721.861	745.733	696.95	-0.0901468	0.0901468	0.173532	-0.173532	1.32874	-1.32874	0.225122	-0.225122	0.114967	1
112	OG0002248	87.3194	126.915	134.581	109.184	160.076	133.807	261.282	221.119	155.904	178.465	0.870324	-0.870324	0.746685	-0.746685	0.695471	-0.695471	-0.563627	0.563627	0.115016	1
141	OG0002413	399.44	310.967	501.564	516.79	140.343	131.067	658.105	433.791	269.059	254.285	-0.129585	0.129585	0.296224	-0.296224	1.78058	-1.78058	0.24468	-0.24468	0.115734	1
1326	OG0005345	880.815	940.211	1277.74	1290.94	1411.58	1646.73	1169.2	1413.97	1495.24	1417.28	-0.0843798	0.0843798	-1.26225	1.26225	-1.55556	1.55556	0.439428	-0.439428	0.115912	1
689	OG0003907	320.697	556.817	513.206	728.857	513.01	459.362	599.422	733.812	564.841	604.371	-1.07725	1.07725	0.342316	-0.342316	-0.625415	0.625415	-0.209768	0.209768	0.115948	1
1512	OG0006269	374.683	405.324	232.041	159.818	1156.38	1230.84	314.323	212.182	297.822	311.729	1.43107	-1.43107	-0.242179	0.242179	1.50631	-1.50631	-0.177157	0.177157	0.116039	1
187	OG0002650	807.787	921.273	717.101	715.222	0	95.6616	86.986	151.805	1292.08	1217.07	0.00267956	-0.00267956	-2.04229	2.04229	-0.554376	0.554376	0.0610558	-0.0610558	0.117216	1
1196	OG0005050	260.374	278.412	241.572	90.322	237.946	210.734	122.596	122.031	371.846	348.296	2.09194	-2.09194	0.278406	-0.278406	0.0105884	-0.0105884	0.15012	-0.15012	0.117268	1
1551	OG0006531	259.104	186.71	252.759	273.834	560.536	500.514	340.129	258.01	180.107	168.02	-0.37511	0.37511	0.530202	-0.530202	1.28678	-1.28678	0.32542	-0.32542	0.117384	1
330	OG0003047	216.873	173.424	94.9328	106.557	270.967	244.448	271.362	194.536	132.333	113.094	-0.538225	0.538225	0.479992	-0.479992	1.53836	-1.53836	0.731314	-0.731314	0.117553	1
189	OG0002656	1442.53	1319.33	1928.55	1931.64	1209.8	1089.83	1331.8	517.491	1134.87	1046.84	-0.0038008	0.0038008	0.247316	-0.247316	2.08747	-2.08747	0.191278	-0.191278	0.117786	1
1593	OG0006855	88.272	89.3698	671.204	627.644	402.243	355.064	79.7718	67.4545	89.5822	97.0664	0.608905	-0.608905	1.1311	-1.1311	1.51897	-1.51897	-0.728016	0.728016	0.117856	1
707	OG0003951	134.948	211.298	242.08	252.855	128.94	138.904	29.966	91.1351	273.931	298.765	-0.083279	0.083279	-0.142313	0.142313	-1.93228	1.93228	-0.165882	0.165882	0.118203	1
[truncated: 1,039 more rows]

## Sheet: Polistes
	Row.names	P_can Queen	P_can Worker	A_caj Queen.x	A_caj Worker.x	V_cra Queen.x	V_cra Worker.x	V_vul Queen.x	V_vul Worker.x	P_qua Queen.x	P_qua Worker.x	A_caj Queen.y	A_caj Worker.y	V_cra Queen.y	V_cra Worker.y	V_vul Queen.y	V_vul Worker.y	P_qua Queen.y	P_qua Worker.y	p.coeffs	q.coeffs
[truncated: 1,605 more rows]

[truncated: 7 more sheets: Mischocyttarus, Agelaia, Vespa, Vespula, Polybia, GO_putative simple society, GO_putative complex society]
