# Supplementary material for: Social complexity, life-history and lineage influence the molecular basis of castes in vespid wasps
Source: Nat Commun. 2023 Feb 24;14:1046. doi: 10.1038/s41467-023-36456-6 (PMC9958023; doi:10.1038/s41467-023-36456-6)
Supplement: Supplementary file 10 — Supplementary Data 7 [file 41467_2023_36456_MOESM10_ESM.xlsx]

## Sheet: ST1
	Hypothesis focus	Test type	Config summary	Supplementary Table name	Test Name	Tree
	Lineage	Branch model	M0 (Model = 0, Nsites = 0); M2 (Model = 2, Nsites = 0)	ST2	Agelaia	((Vespa_crabro,Vespula_vulgaris),(Mischocyttarus_basimacula,(Polistes_canadensis,(((Polybia_quadracincta,(Metapolybia_cingulata,Brachygastra_mellifica)),Agelaia_cajannensis #1),Angiopolybia_pallens))));
				ST3	Angiopolybia	((Vespa_crabro,Vespula_vulgaris),(Mischocyttarus_basimacula,(Polistes_canadensis,(((Polybia_quadracincta,(Metapolybia_cingulata,Brachygastra_mellifica)),Agelaia_cajannensis),Angiopolybia_pallens #1))));
				ST4	Brachygastra	((Vespa_crabro,Vespula_vulgaris),(Mischocyttarus_basimacula,(Polistes_canadensis,(((Polybia_quadracincta,(Metapolybia_cingulata,Brachygastra_mellifica #1)),Agelaia_cajannensis),Angiopolybia_pallens))));
				ST5	Metapolybia	((Vespa_crabro,Vespula_vulgaris),(Mischocyttarus_basimacula,(Polistes_canadensis,(((Polybia_quadracincta,(Metapolybia_cingulata #1,Brachygastra_mellifica)),Agelaia_cajannensis),Angiopolybia_pallens))));
				ST6	Mischocyttarus	((Vespa_crabro,Vespula_vulgaris),(Mischocyttarus_basimacula #1,(Polistes_canadensis,(((Polybia_quadracincta,(Metapolybia_cingulata,Brachygastra_mellifica)),Agelaia_cajannensis),Angiopolybia_pallens))));
				ST7	Polistes	((Vespa_crabro,Vespula_vulgaris),(Mischocyttarus_basimacula,(Polistes_canadensis #1,(((Polybia_quadracincta,(Metapolybia_cingulata,Brachygastra_mellifica)),Agelaia_cajannensis),Angiopolybia_pallens))));
				ST8	Polybia	((Vespa_crabro,Vespula_vulgaris),(Mischocyttarus_basimacula,(Polistes_canadensis,(((Polybia_quadracincta #1,(Metapolybia_cingulata,Brachygastra_mellifica)),Agelaia_cajannensis),Angiopolybia_pallens))));
				ST9	Vespa	((Vespa_crabro #1,Vespula_vulgaris),(Mischocyttarus_basimacula,(Polistes_canadensis,(((Polybia_quadracincta,(Metapolybia_cingulata,Brachygastra_mellifica)),Agelaia_cajannensis),Angiopolybia_pallens))));
				ST10	Vespula	((Vespa_crabro,Vespula_vulgaris #1),(Mischocyttarus_basimacula,(Polistes_canadensis,(((Polybia_quadracincta,(Metapolybia_cingulata,Brachygastra_mellifica)),Agelaia_cajannensis),Angiopolybia_pallens))));
				ST11	Vespa+Vespula	((Vespa_crabro #1,Vespula_vulgaris #1) #1,(Mischocyttarus_basimacula,(Polistes_canadensis,(((Polybia_quadracincta,(Metapolybia_cingulata,Brachygastra_mellifica)),Agelaia_cajannensis ),Angiopolybia_pallens))));
				ST12	SwarmVsIndependent	((Vespa_crabro,Vespula_vulgaris),(Mischocyttarus_basimacula,(Polistes_canadensis,(((Polybia_quadracincta #1,(Metapolybia_cingulata #1,Brachygastra_mellifica #1) #1 ),Agelaia_cajannensis #1) #1,Angiopolybia_pallens #1) #1 )));
	Sociality			ST13	SimpleVSAll	((Vespa_crabro,Vespula_vulgaris),(Mischocyttarus_basimacula #1,(Polistes_canadensis #1,(((Polybia_quadracincta,(Metapolybia_cingulata #1,Brachygastra_mellifica)),Agelaia_cajannensis),Angiopolybia_pallens #1))));
				ST14	ComplexVsAll	((Vespa_crabro #1,Vespula_vulgaris #1) #1,(Mischocyttarus_basimacula,(Polistes_canadensis,(((Polybia_quadracincta,(Metapolybia_cingulata,Brachygastra_mellifica #1)),Agelaia_cajannensis #1),Angiopolybia_pallens))));
				ST15	SimpleVsAllPolistines	(Mischocyttarus_basimacula #1,(Polistes_canadensis #1,(((Polybia_quadracincta,(Metapolybia_cingulata,Brachygastra_mellifica #1)),Agelaia_cajannensis),Angiopolybia_pallens)));
				ST16	ComplexVSAllPolistines	(Mischocyttarus_basimacula,(Polistes_canadensis,(((Polybia_quadracincta #1,(Metapolybia_cingulata,Brachygastra_mellifica #1)),Agelaia_cajannensis #1),Angiopolybia_pallens)));
	Lineage	Branch-site model	null model (Model = 2, Nsites = 2; fix_omega = 1); alternative model (Model = 2, Nsites = 2; fix_omega = 0)	ST17	Agelaia	((Vespa_crabro,Vespula_vulgaris),(Mischocyttarus_basimacula,(Polistes_canadensis,(((Polybia_quadracincta,(Metapolybia_cingulata,Brachygastra_mellifica)),Agelaia_cajannensis #1),Angiopolybia_pallens))));
				ST18	Angiopolybia	((Vespa_crabro,Vespula_vulgaris),(Mischocyttarus_basimacula,(Polistes_canadensis,(((Polybia_quadracincta,(Metapolybia_cingulata,Brachygastra_mellifica)),Agelaia_cajannensis),Angiopolybia_pallens #1))));
				ST19	Brachygastra	((Vespa_crabro,Vespula_vulgaris),(Mischocyttarus_basimacula,(Polistes_canadensis,(((Polybia_quadracincta,(Metapolybia_cingulata,Brachygastra_mellifica #1)),Agelaia_cajannensis),Angiopolybia_pallens))));
				ST20	Metapolybia	((Vespa_crabro,Vespula_vulgaris),(Mischocyttarus_basimacula,(Polistes_canadensis,(((Polybia_quadracincta,(Metapolybia_cingulata #1,Brachygastra_mellifica)),Agelaia_cajannensis),Angiopolybia_pallens))));
				ST21	Mischocyttarus	((Vespa_crabro,Vespula_vulgaris),(Mischocyttarus_basimacula #1,(Polistes_canadensis,(((Polybia_quadracincta,(Metapolybia_cingulata,Brachygastra_mellifica)),Agelaia_cajannensis),Angiopolybia_pallens))));
				ST22	Polistes	((Vespa_crabro,Vespula_vulgaris),(Mischocyttarus_basimacula,(Polistes_canadensis #1,(((Polybia_quadracincta,(Metapolybia_cingulata,Brachygastra_mellifica)),Agelaia_cajannensis),Angiopolybia_pallens))));
				ST23	Polybia	((Vespa_crabro,Vespula_vulgaris),(Mischocyttarus_basimacula,(Polistes_canadensis,(((Polybia_quadracincta #1,(Metapolybia_cingulata,Brachygastra_mellifica)),Agelaia_cajannensis),Angiopolybia_pallens))));
				ST24	Vespa	((Vespa_crabro #1,Vespula_vulgaris),(Mischocyttarus_basimacula,(Polistes_canadensis,(((Polybia_quadracincta,(Metapolybia_cingulata,Brachygastra_mellifica)),Agelaia_cajannensis),Angiopolybia_pallens))));
				ST25	Vespula	((Vespa_crabro,Vespula_vulgaris #1),(Mischocyttarus_basimacula,(Polistes_canadensis,(((Polybia_quadracincta,(Metapolybia_cingulata,Brachygastra_mellifica)),Agelaia_cajannensis),Angiopolybia_pallens))));
				ST26	Vespa+Vespula	((Vespa_crabro #1,Vespula_vulgaris #1) #1,(Mischocyttarus_basimacula,(Polistes_canadensis,(((Polybia_quadracincta,(Metapolybia_cingulata,Brachygastra_mellifica)),Agelaia_cajannensis ),Angiopolybia_pallens))));

## Sheet: ST2
ST2: Branch model with Agelaia foreground
orthogroup	w_M0	np_M0	lnL_M0	np_M2	lnL_M2	background_w	foreground_w	kappa_M2	D	DF	chiTest
OG0002765	0.03944	18	-853.203	19	-852.341	0.0427	0.0001	3.09842	1.72531	1	0.189011
OG0002853	0.13	18	-803.446	19	-803.099	0.14436	0.0001	1.54937	0.693658	1	0.404923
OG0002768	0.09088	18	-2100.05	19	-2095.58	0.09943	0.0001	4.91786	8.93852	1	0.00279219
OG0002776	0.28987	18	-3357.12	19	-3356.95	0.28651	0.39338	2.12802	0.322902	1	0.569869
OG0002834	0.37294	18	-2694.5	19	-2694.39	0.36673	0.44248	3.14664	0.217466	1	0.640978
OG0002845	0.0209	18	-1997.69	19	-1997.07	0.01882	0.05936	5.92619	1.22487	1	0.268407
OG0002819	0.2508	18	-2494.61	19	-2494.19	0.24117	0.36352	2.10431	0.841624	1	0.358933
OG0002807	0.181	18	-1375.7	19	-1374.95	0.19095	0.089	2.50454	1.50424	1	0.22002
OG0002832	0.01567	18	-1575.63	19	-1575.46	0.01605	0.0001	4.3636	0.340284	1	0.559665
OG0002842	0.12313	18	-2246.22	19	-2243.48	0.13305	0.03492	2.71404	5.47103	1	0.0193343
OG0002835	0.14801	18	-2524.25	19	-2524.25	0.14798	0.14833	3.42239	2.6e-05	1	0.995932
OG0002852	0.29487	18	-3235.61	19	-3235.2	0.28569	0.38982	4.39903	0.825512	1	0.363573
OG0002808	0.43556	18	-1770.35	19	-1770.35	0.43631	0.42801	2.23986	0.00123	1	0.972023
OG0002795	0.06507	18	-996.867	19	-996.864	0.06539	0.05999	4.43823	0.005882	1	0.938867
OG0002831	0.07632	18	-2399.34	19	-2397.85	0.08096	0.01554	4.97751	2.97842	1	0.0843814
OG0002824	0.34816	18	-2463.39	19	-2462.9	0.3605	0.21935	3.70918	0.97242	1	0.324077
OG0002784	0.16557	18	-3058.47	19	-3057.52	0.17374	0.09262	6.06833	1.91561	1	0.166341
OG0002779	0.24002	18	-4390.07	19	-4387.81	0.22534	0.42403	3.24219	4.50673	1	0.0337618
OG0002804	0.00887	18	-1458.43	19	-1458.27	0.00913	0.0001	5.54893	0.323928	1	0.569257
OG0002767	0.01778	18	-4543.14	19	-4542.08	0.01841	0.0001	3.20829	2.12268	1	0.145133
OG0002775	0.03634	18	-5502.95	19	-5502.88	0.0368	0.03081	4.40176	0.132696	1	0.715653
OG0002783	0.03785	18	-1957.22	19	-1956.07	0.04002	0.0001	6.94424	2.30087	1	0.129301
OG0002828	0.0896	18	-2821.74	19	-2821.46	0.08602	0.13946	4.89679	0.56534	1	0.452117
OG0002847	0.22659	18	-5071.94	19	-5071.64	0.22354	0.31625	3.1412	0.614906	1	0.432947
OG0002777	0.08202	18	-5157.02	19	-5156.68	0.08026	0.11129	3.62484	0.665488	1	0.414629
OG0002812	0.19847	18	-5065.62	19	-5064.66	0.2046	0.11966	4.49622	1.92719	1	0.165066
OG0002787	0.11787	18	-2683.4	19	-2683.02	0.12216	0.0808	3.87283	0.761204	1	0.382952
OG0002846	0.1719	18	-4430.66	19	-4429.33	0.16529	0.30861	3.58795	2.65558	1	0.103187
OG0002786	0.03557	18	-3967.51	19	-3966.69	0.03746	0.01568	5.68501	1.65403	1	0.198411
OG0002815	0.09386	18	-4137.01	19	-4136.97	0.09314	0.10559	2.49998	0.06695	1	0.79583
OG0002813	0.03104	18	-4175.64	19	-4175.54	0.03057	0.04495	5.21677	0.201622	1	0.653415
OG0002810	0.34733	18	-3371.8	19	-3371.38	0.35994	0.26239	4.33296	0.841908	1	0.358852
OG0002811	0.09815	18	-3435.38	19	-3434.32	0.10289	0.04525	5.1284	2.12468	1	0.144943
OG0002837	0.06585	18	-5136.38	19	-5136.11	0.06777	0.04725	5.0332	0.55541	1	0.456116
OG0002827	0.1309	18	-2534.28	19	-2534.28	0.13051	0.13759	4.94878	0.003856	1	0.950486
OG0002818	0.085	18	-4321.11	19	-4320.03	0.0808	0.15397	5.71742	2.17162	1	0.140578
OG0002844	0.06354	18	-3278.05	19	-3276.17	0.06739	0.0001	4.3136	3.75749	1	0.0525715
OG0002823	0.11698	18	-3349.86	19	-3348.91	0.12322	0.06993	2.91138	1.90431	1	0.167597
OG0002806	0.03976	18	-2267.33	19	-2266.5	0.03712	0.08713	4.26202	1.65453	1	0.198343
OG0002809	0.19556	18	-5686.19	19	-5685.93	0.19205	0.23943	3.76968	0.520818	1	0.470493
OG0002791	0.21691	18	-4750.97	19	-4750.93	0.21846	0.19748	3.91086	0.08115	1	0.775745
OG0002782	0.03681	18	-4909.93	19	-4909.93	0.03677	0.0381	5.85674	0.002092	1	0.963519
OG0002849	0.1118	18	-5091.5	19	-5091.01	0.11545	0.07522	5.91018	0.99553	1	0.318395
OG0002796	0.06235	18	-4685.42	19	-4683.74	0.06573	0.02204	6.12956	3.35247	1	0.0671044
OG0002788	0.05119	18	-4234.65	19	-4234.62	0.05159	0.04444	6.0376	0.070992	1	0.789898
OG0002780	0.06618	18	-5217.14	19	-5217.09	0.06554	0.07515	5.53029	0.10861	1	0.741732
OG0002762	0.02417	18	-3721.87	19	-3720.06	0.02546	0.0001	3.16485	3.63423	1	0.0566029
OG0002785	0.19435	18	-3874.36	19	-3873.57	0.18637	0.31674	5.3744	1.57252	1	0.209842
OG0002805	0.1653	18	-3386.74	19	-3382.22	0.14851	0.47508	4.17664	9.04743	1	0.00263064
OG0002797	0.04362	18	-4185.35	19	-4184.21	0.04595	0.01637	5.12376	2.28461	1	0.130663
OG0002800	0.07673	18	-3271.32	19	-3270.08	0.07225	0.14713	2.53513	2.48317	1	0.11507
OG0002840	0.26381	18	-9637.51	19	-9635.48	0.27178	0.14846	3.32102	4.07262	1	0.0435837
OG0002850	0.06746	18	-6515.89	19	-6515.53	0.06584	0.09757	5.41314	0.720002	1	0.396143
OG0002760	0.02646	18	-5181.02	19	-5180.53	0.02538	0.04378	4.29419	0.989576	1	0.319846
OG0002759	0.03381	18	-3839.19	19	-3837.46	0.03647	0.0001	3.80795	3.45409	1	0.0630955
OG0002802	0.2821	18	-5571.53	19	-5569.8	0.29372	0.15226	5.13013	3.46285	1	0.0627621
OG0002821	0.12603	18	-3841.91	19	-3840.07	0.11987	0.28593	4.87532	3.68529	1	0.0548944
OG0002843	0.02858	18	-4794.85	19	-4794.78	0.02772	0.03801	6.03333	0.151208	1	0.697384
OG0002761	0.12377	18	-6258.39	19	-6258.34	0.12482	0.11321	2.34036	0.097956	1	0.754296
OG0002814	0.07877	18	-5597.77	19	-5594.11	0.0825	0.01235	6.15718	7.31991	1	0.00681948
OG0002770	0.09726	18	-6167.79	19	-6167.72	0.09815	0.08394	4.0129	0.1337	1	0.714626
OG0002838	0.16359	18	-9518.98	19	-9518.95	0.16432	0.15576	2.79217	0.060638	1	0.80549
OG0002859	0.21793	18	-1568.94	19	-1568.54	0.22641	0.12213	2.88792	0.786958	1	0.375022
OG0002758	0.17364	18	-6533.58	19	-6533.2	0.17712	0.13394	4.41578	0.745916	1	0.387772
OG0002833	0.08145	18	-6355.47	19	-6352.62	0.08585	0.02038	4.32453	5.70123	1	0.016953
OG0002855	0.31461	18	-3118.93	19	-3118.86	0.31796	0.27289	2.49017	0.125752	1	0.722878
OG0002865	0.19472	18	-2284.56	19	-2284.53	0.19595	0.17108	3.69241	0.048016	1	0.826552
OG0002830	0.34302	18	-10013.5	19	-10013.3	0.34785	0.2971	1.96408	0.446412	1	0.504044
OG0002817	0.13979	18	-7495.52	19	-7495.52	0.13977	0.14027	4.08214	0.000102	1	0.991942
OG0002798	0.06242	18	-5614.72	19	-5614.72	0.06253	0.06139	2.6417	0.00218	1	0.96276
OG0002789	0.34	18	-8505.8	19	-8499.75	0.35445	0.06153	3.25549	12.1006	1	0.000504043
OG0002854	0.06955	18	-2720.7	19	-2719.43	0.07234	0.0001	2.97981	2.53757	1	0.111166
OG0002793	0.04037	18	-6418.68	19	-6415.9	0.04237	0.0001	4.59343	5.55488	1	0.0184292
OG0002863	0.05036	18	-3920.4	19	-3918.8	0.05316	0.01199	4.03328	3.20292	1	0.0735068
OG0002860	0.0334	18	-3126.64	19	-3126.58	0.03388	0.0234	4.19292	0.13231	1	0.716049
OG0002868	0.16629	18	-2191.2	19	-2190.86	0.17006	0.08881	6.1557	0.670526	1	0.412868
OG0002869	0.28578	18	-6682.91	19	-6682.72	0.2819	0.33654	4.30961	0.378352	1	0.538487
OG0002874	0.07871	18	-1765.61	19	-1762.18	0.0656	0.33228	4.81451	6.86231	1	0.00880325
OG0002875	0.05819	18	-3697.44	19	-3696.94	0.05625	0.09517	5.31598	0.997676	1	0.317874
OG0002872	0.0537	18	-2755.73	19	-2753.69	0.05796	0.0001	4.06659	4.08859	1	0.0431736
OG0002957	0.27345	18	-1257.73	19	-1257.67	0.27998	0.23128	3.48499	0.11437	1	0.735223
OG0003025	0.19434	18	-1199.05	19	-1199.05	0.19302	0.20468	3.51801	0.004036	1	0.949345
OG0002942	0.26678	18	-3058.06	19	-3058	0.26942	0.22813	3.207	0.125146	1	0.723519
OG0002995	0.3546	18	-3137.55	19	-3136.4	0.37173	0.19791	2.36524	2.28984	1	0.130223
OG0002897	0.01943	18	-1785.27	19	-1783.58	0.02158	0.0001	6.10525	3.39228	1	0.0655023
OG0002994	0.14942	18	-2787.77	19	-2787.74	0.15043	0.12458	4.38204	0.06557	1	0.7979
OG0002888	0.0089	18	-1410.73	19	-1410.23	0.01012	0.0001	2.34245	0.997884	1	0.317823
OG0002992	0.21997	18	-1856.87	19	-1855.95	0.22844	0.06006	4.98975	1.85153	1	0.173606
OG0002877	0.16501	18	-2433.73	19	-2432.04	0.17416	0.03512	3.40163	3.3922	1	0.0655053
OG0003065	0.19393	18	-1004.21	19	-1002.49	0.21452	0.03998	4.43715	3.42807	1	0.0640971
OG0002996	0.15787	18	-2794.08	19	-2794.08	0.15763	0.16124	3.6972	0.002208	1	0.962522
OG0003036	0.08626	18	-2954.97	19	-2954.92	0.08747	0.07393	6.3772	0.111458	1	0.73849
OG0003018	0.06159	18	-3911.61	19	-3911.35	0.06296	0.04262	5.66223	0.512912	1	0.473881
OG0002912	0.00918	18	-1941.63	19	-1941.46	0.00951	0.0001	3.69314	0.341968	1	0.558695
OG0002973	0.33718	18	-2222.05	19	-2221.55	0.32449	0.55244	2.87622	1.00905	1	0.31513
OG0003003	0.03152	18	-1731.02	19	-1730.7	0.02992	0.0608	3.78238	0.637778	1	0.424517
OG0002999	0.01473	18	-2703.51	19	-2702.19	0.01593	0.0001	3.34494	2.63843	1	0.104306
OG0002902	0.07312	18	-2493.51	19	-2493.14	0.07537	0.04396	4.14693	0.750534	1	0.386307
OG0002940	0.05292	18	-1591.64	19	-1586.41	0.03319	0.22052	2.64081	10.4543	1	0.00122367
OG0003039	0.03184	18	-2967.05	19	-2967.04	0.03149	0.03519	6.00127	0.018994	1	0.890384
OG0002900	0.29077	18	-4467.48	19	-4467.44	0.29344	0.26699	3.07985	0.089442	1	0.764888
OG0002933	0.28441	18	-3485.22	19	-3485.02	0.28012	0.39064	4.26002	0.399974	1	0.527103
OG0002882	0.17353	18	-2871.81	19	-2871.74	0.17592	0.14594	3.49519	0.13685	1	0.711433
OG0002891	0.27275	18	-4774.41	19	-4774.37	0.27113	0.30309	3.22269	0.074842	1	0.784413
OG0003016	0.05757	18	-3586.47	19	-3586.12	0.0592	0.03564	6.55873	0.690234	1	0.406085
OG0003011	0.12588	18	-4148.95	19	-4148.77	0.12334	0.15274	6.24045	0.377904	1	0.538727
OG0003019	0.33278	18	-2920.55	19	-2920.02	0.34211	0.208	3.40697	1.04791	1	0.305989
OG0002896	0.02112	18	-1293.87	19	-1291.53	0.01505	0.13584	2.29387	4.67981	1	0.0305191
OG0002986	0.03022	18	-1829.87	19	-1829.77	0.03119	0.01869	5.16388	0.208914	1	0.64762
OG0003022	0.05295	18	-1615.63	19	-1614.63	0.05505	0.0001	3.10724	1.99828	1	0.157477
OG0002923	0.04914	18	-2839.08	19	-2839.08	0.04895	0.05171	6.82501	0.006748	1	0.93453
OG0002890	0.06416	18	-1871.93	19	-1871.93	0.06454	0.05898	3.83504	0.012174	1	0.912143
OG0002887	0.29569	18	-5191.59	19	-5190.5	0.28478	0.44873	3.58221	2.18463	1	0.139394
OG0003049	0.49257	18	-3982.46	19	-3981.34	0.51467	0.299	3.44095	2.24849	1	0.133745
OG0003058	0.06799	18	-1706.64	19	-1706.56	0.06956	0.04753	4.3084	0.157928	1	0.691071
OG0002997	0.0567	18	-4757.5	19	-4757.13	0.05506	0.08086	6.63286	0.736632	1	0.390742
OG0003008	0.15886	18	-2722.01	19	-2716.88	0.17452	0.01783	4.27653	10.2429	1	0.00137213
OG0003041	0.06234	18	-2890.31	19	-2888.27	0.06725	0.0001	2.29426	4.07751	1	0.0434576
OG0002903	0.02202	18	-2859.7	19	-2859.64	0.02236	0.0158	3.3232	0.12057	1	0.728417
OG0002990	0.07028	18	-4137.19	19	-4136.07	0.07373	0.0279	5.73812	2.2404	1	0.134446
OG0003046	0.13826	18	-3676.06	19	-3675.13	0.1432	0.07109	2.71442	1.87058	1	0.171409
OG0002966	0.12211	18	-4564.79	19	-4564.37	0.12485	0.08105	5.78743	0.842336	1	0.35873
OG0002906	0.09193	18	-5566.18	19	-5566.02	0.09304	0.07292	5.09584	0.302318	1	0.582433
OG0003047	0.12531	18	-4438.94	19	-4438.74	0.12359	0.16525	5.08107	0.383768	1	0.535594
OG0002941	0.03458	18	-2096.11	19	-2095.36	0.03599	0.0001	2.56109	1.49758	1	0.221044
OG0002959	0.01697	18	-3331	19	-3330.53	0.01792	0.00737	7.26758	0.94023	1	0.332219
OG0002984	0.16034	18	-2300.46	19	-2300.07	0.1667	0.10528	3.56734	0.770158	1	0.380168
OG0003000	0.00581	18	-2294.47	19	-2294.26	0.00599	0.0001	7.26798	0.41188	1	0.521017
OG0003035	0.08877	18	-2846.67	19	-2842.11	0.09728	0.0001	5.5133	9.13675	1	0.00250525
OG0003071	0.0971	18	-3205.1	19	-3204.88	0.09903	0.06965	4.49061	0.429058	1	0.512452
OG0003030	0.10662	18	-3305.29	19	-3305.25	0.10756	0.09138	5.60557	0.086832	1	0.768244
OG0003050	0.19507	18	-4130.99	19	-4130.12	0.18634	0.29339	3.24713	1.74012	1	0.187123
OG0002937	0.1198	18	-4217.62	19	-4217.24	0.12267	0.08596	2.11832	0.766242	1	0.381382
OG0002962	0.16722	18	-3751.88	19	-3751.39	0.16231	0.24325	2.11608	0.984066	1	0.321197
OG0003068	0.13804	18	-2907.73	19	-2905.28	0.12755	0.33243	3.7815	4.90106	1	0.0268402
OG0003040	0.22796	18	-4964.4	19	-4964.26	0.22485	0.26952	4.00018	0.287374	1	0.591908
OG0002914	0.02268	18	-3240.2	19	-3237.26	0.02508	0.0001	5.16784	5.86827	1	0.0154162
OG0002905	0.28451	18	-4359.86	19	-4354.7	0.251	0.60814	2.7967	10.3153	1	0.00131935
OG0002904	0.2036	18	-2824.37	19	-2823.2	0.21479	0.07662	2.98914	2.33888	1	0.126181
OG0003069	0.13987	18	-3221.1	19	-3221.09	0.13951	0.1463	4.92287	0.00807	1	0.92842
OG0002943	0.09869	18	-3006.13	19	-3006.02	0.09731	0.13108	2.42526	0.214858	1	0.642986
OG0003024	0.03532	18	-4202.42	19	-4202	0.03305	0.0584	3.88313	0.841954	1	0.358839
OG0003048	0.06563	18	-2776.99	19	-2776.71	0.06803	0.04333	4.89092	0.55873	1	0.454772
OG0002927	0.02651	18	-3130.57	19	-3129.43	0.02493	0.09143	3.27776	2.29237	1	0.130012
OG0002964	0.03328	18	-4042.22	19	-4041.59	0.03154	0.06339	5.98862	1.25252	1	0.263071
OG0002907	0.07585	18	-3285.58	19	-3284.48	0.07964	0.02761	3.34492	2.20151	1	0.137875
OG0003004	0.06733	18	-3622.29	19	-3619.34	0.06977	0.0001	2.88942	5.90931	1	0.0150611
OG0002981	0.16478	18	-4634.75	19	-4631.43	0.17386	0.05207	4.87116	6.6405	1	0.00996858
OG0003053	0.02797	18	-4650.39	19	-4650.17	0.02718	0.04212	5.29324	0.43533	1	0.509385
OG0003014	0.12981	18	-6995.98	19	-6994.64	0.12539	0.20036	3.68323	2.69607	1	0.100596
OG0002885	0.08927	18	-6884.64	19	-6884.55	0.09006	0.07523	6.70095	0.168016	1	0.681881
OG0002894	0.26106	18	-6566.43	19	-6565.73	0.26795	0.18837	5.97042	1.39899	1	0.236893
OG0002987	0.22495	18	-7039.39	19	-7038.43	0.21915	0.33735	4.63908	1.91569	1	0.166333
OG0003001	0.03724	18	-4709.09	19	-4706.35	0.03947	0.0001	2.5772	5.47799	1	0.0192574
OG0003020	0.14061	18	-5781.22	19	-5781.2	0.14124	0.13103	3.75515	0.042872	1	0.835966
OG0003054	0.09475	18	-5863.49	19	-5863.26	0.09306	0.11882	4.83566	0.478872	1	0.488934
OG0002909	0.20838	18	-5794.39	19	-5794.35	0.20702	0.22993	5.19409	0.097966	1	0.754284
OG0002921	0.21179	18	-4374.4	19	-4373.64	0.21945	0.11849	5.00568	1.52186	1	0.217338
OG0003026	0.113	18	-4906.61	19	-4906.24	0.11034	0.15444	4.5074	0.73497	1	0.391277
OG0002951	0.15728	18	-7631.22	19	-7630.27	0.1613	0.10646	3.78422	1.88773	1	0.169458
OG0002913	0.01538	18	-3311.78	19	-3310.52	0.01612	0.0001	5.05667	2.51504	1	0.112765
OG0003064	0.09463	18	-3633.45	19	-3633.43	0.09496	0.08118	2.54648	0.037788	1	0.845869
OG0002938	0.07509	18	-3889.56	19	-3887.5	0.07944	0.0001	3.78689	4.1146	1	0.0425146
OG0002901	0.08074	18	-5850.5	19	-5850.5	0.08053	0.0836	4.91325	0.008418	1	0.926897
OG0003012	0.14342	18	-5739.17	19	-5736.55	0.15024	0.0001	3.19965	5.24423	1	0.0220196
OG0002880	0.18489	18	-3462.33	19	-3460.18	0.19775	0.05778	2.95433	4.30203	1	0.0380669
OG0002917	0.0159	18	-3324.75	19	-3324.03	0.01713	0.0001	6.23753	1.43945	1	0.230228
OG0003017	0.08407	18	-7718.87	19	-7715.2	0.07905	0.17328	3.77033	7.35224	1	0.00669794
OG0002915	0.15611	18	-7164.67	19	-7161.85	0.16287	0.06655	3.70481	5.63253	1	0.0176301
OG0003056	0.08463	18	-4156.71	19	-4154.73	0.08961	0.02464	4.92042	3.97118	1	0.0462853
OG0002978	0.13088	18	-5202.14	19	-5201.65	0.12733	0.18115	5.79802	0.99539	1	0.318429
OG0003006	0.23619	18	-7894.91	19	-7894.87	0.23736	0.22045	3.63114	0.075054	1	0.784115
OG0003055	0.11491	18	-5923.71	19	-5922.17	0.11968	0.05195	4.34421	3.07766	1	0.0793748
OG0002925	0.132	18	-4684.58	19	-4682.51	0.13736	0.04377	4.74346	4.14316	1	0.0418031
OG0002911	0.11554	18	-4338.66	19	-4338.62	0.11667	0.10316	3.42707	0.081344	1	0.775484
OG0002922	0.13188	18	-4584.59	19	-4584.23	0.13402	0.07638	3.36374	0.714546	1	0.397939
OG0002910	0.01138	18	-3639.16	19	-3638.56	0.01204	0.0001	2.76324	1.19959	1	0.273404
OG0002949	0.04507	18	-3405.99	19	-3404.94	0.04683	0.0001	2.12066	2.08779	1	0.148481
OG0003057	0.02916	18	-3518.8	19	-3516.25	0.02311	0.11528	6.73497	5.08988	1	0.0240659
OG0003061	0.12193	18	-7017.97	19	-7015.65	0.12684	0.05723	2.65932	4.63524	1	0.0313218
OG0003031	0.02087	18	-5351.36	19	-5351.35	0.02075	0.02249	2.7526	0.016276	1	0.898483
OG0003010	0.01873	18	-4461.33	19	-4459.97	0.01976	0.0001	2.37965	2.70705	1	0.0999055
OG0002971	0.04406	18	-5047.36	19	-5047.22	0.04313	0.05581	3.4879	0.281614	1	0.595645
OG0003043	0.07259	18	-6257.62	19	-6253.72	0.07743	0.01826	2.26456	7.79705	1	0.00523315
OG0002931	0.28029	18	-9941.47	19	-9940.62	0.27348	0.36312	3.00916	1.69765	1	0.192596
OG0002993	0.07947	18	-6784.14	19	-6784.14	0.0796	0.07752	5.10141	0.005068	1	0.943247
OG0002988	0.16254	18	-5244.56	19	-5244.55	0.16308	0.15607	2.31819	0.01316	1	0.908669
OG0003070	0.07775	18	-5946.71	19	-5946.71	0.07751	0.08015	3.81646	0.009722	1	0.921456
OG0003051	0.07714	18	-2986.16	19	-2984.04	0.0858	0.0152	6.65307	4.23115	1	0.0396884
OG0003060	0.05174	18	-5781.27	19	-5780.32	0.05347	0.01862	4.78317	1.89893	1	0.168198
OG0002920	0.17118	18	-6820.67	19	-6820.62	0.17235	0.15604	4.18208	0.104214	1	0.74683
OG0002976	0.06168	18	-3282.2	19	-3281.92	0.05936	0.0921	4.22611	0.574442	1	0.448499
OG0003062	0.04443	18	-4779.07	19	-4778.85	0.04577	0.02812	5.23113	0.450446	1	0.502123
OG0003029	0.21582	18	-5325.14	19	-5325.06	0.21782	0.18092	3.50611	0.153098	1	0.695592
OG0002878	0.06707	18	-5819.45	19	-5819.41	0.06644	0.07427	6.06439	0.083486	1	0.772628
OG0002991	0.12082	18	-4524.41	19	-4524.27	0.12236	0.08923	4.64158	0.280476	1	0.596389
OG0002948	0.05125	18	-4636.77	19	-4636.22	0.05363	0.03539	4.65092	1.09362	1	0.29567
OG0002956	0.17239	18	-4800.6	19	-4800.6	0.1723	0.17345	4.5739	0.000338	1	0.985332
OG0002895	0.18947	18	-6972.61	19	-6971.41	0.19601	0.11941	3.36212	2.40129	1	0.121235
OG0002980	0.0786	18	-4457.03	19	-4455.11	0.08176	0.0001	3.56917	3.84828	1	0.049797
OG0003021	0.10096	18	-5842.72	19	-5841.68	0.09683	0.16722	4.04754	2.08379	1	0.14887
OG0002929	0.03393	18	-4538.14	19	-4538.11	0.03422	0.02815	2.0012	0.064228	1	0.799934
OG0002963	0.01457	18	-4794.63	19	-4791.58	0.01264	0.10354	4.15796	6.11571	1	0.0133986
OG0002918	0.07556	18	-7162.2	19	-7161.04	0.07845	0.03916	2.65136	2.33493	1	0.126501
OG0002928	0.19007	18	-8443.18	19	-8441.77	0.18165	0.2648	2.87711	2.83085	1	0.0924693
OG0002985	0.0754	18	-6323.98	19	-6323.95	0.07495	0.08229	3.97991	0.061272	1	0.804497
OG0002947	0.11988	18	-5672.79	19	-5671.71	0.11311	0.18489	4.58597	2.1564	1	0.141977
OG0002916	0.02649	18	-6706.32	19	-6706.1	0.02599	0.03795	3.15384	0.436204	1	0.50896
OG0002879	0.07954	18	-6109.21	19	-6103.06	0.06314	0.19	6.508	12.299	1	0.000453197
OG0002998	0.08418	18	-6258.14	19	-6254.32	0.09012	0.01789	3.33117	7.63487	1	0.00572506
OG0003032	0.04901	18	-6149.25	19	-6149.18	0.04967	0.03956	3.55339	0.13552	1	0.712776
OG0003075	0.13198	18	-1606.32	19	-1606.1	0.12617	0.19834	2.07912	0.447306	1	0.503617
OG0003073	0.03456	18	-5542.84	19	-5542.71	0.03514	0.02553	6.08774	0.266416	1	0.605746
OG0003072	0.03005	18	-4115.62	19	-4115.62	0.03003	0.03031		0.00021	1	0.988438
OG0003078	0.02924	18	-6443.5	19	-6441.36	0.02664	0.06504	4.52286	4.26116	1	0.0389932
OG0003077	0.06406	18	-5354.03	19	-5353.67	0.06251	0.09654	5.19005	0.71421	1	0.39805
OG0003084	0.25485	18	-3132.52	19	-3131.05	0.27309	0.15035	3.16579	2.9331	1	0.0867809
OG0003082	0.17325	18	-4124.66	19	-4124.64	0.17395	0.16326	5.81332	0.024758	1	0.874972
OG0003081	0.03902	18	-5370.6	19	-5365.86	0.04217	0.0001	4.3172	9.47836	1	0.0020791
OG0003085	0.10456	18	-4732.31	19	-4732.27	0.10506	0.086	4.22327	0.082238	1	0.774287
OG0003079	0.13123	18	-6678.17	19	-6676.9	0.12704	0.2342	2.57911	2.55709	1	0.109801
OG0003090	0.17861	18	-960.424	19	-960.31	0.17272	0.24373	2.91757	0.229064	1	0.632219
OG0003148	0.14213	18	-1124.62	19	-1122.98	0.15611	0.0001	4.76753	3.27681	1	0.0702655
OG0003136	0.22764	18	-2507.29	19	-2503.48	0.25141	0.06501	4.26782	7.61313	1	0.0057945
OG0003114	0.21073	18	-3975.17	19	-3974.75	0.20544	0.28529	3.07485	0.849266	1	0.35676
OG0003159	0.08802	18	-1557.86	19	-1557.79	0.08918	0.0654	2.03578	0.138512	1	0.709765
OG0003089	0.08636	18	-1710.84	19	-1710.5	0.08986	0.04779	4.71498	0.680154	1	0.409534
OG0003135	0.02961	18	-1785.87	19	-1785.83	0.02915	0.03989	6.80523	0.072562	1	0.787642
OG0003146	0.23383	18	-4025.45	19	-4025.2	0.2378	0.17757	2.29314	0.495962	1	0.48128
OG0003171	0.06334	18	-1324.56	19	-1324.55	0.06352	0.05869	1.85567	0.004888	1	0.944262
OG0003167	0.07341	18	-2697.02	19	-2697.02	0.07342	0.07327	3.95238	1.6e-05	1	0.996808
OG0003121	0.08568	18	-3075.56	19	-3075.33	0.08798	0.06083	3.91616	0.456696	1	0.499172
OG0003110	0.05269	18	-2926	19	-2925.77	0.05385	0.0327	4.87233	0.451598	1	0.501577
OG0003147	0.0585	18	-2455.29	19	-2454.58	0.05636	0.15002	6.2755	1.41315	1	0.234534
OG0003123	0.07433	18	-2676.61	19	-2676.27	0.07712	0.04478	5.26872	0.68913	1	0.40646
OG0003160	0.08065	18	-2324.71	19	-2322.14	0.07522	0.44839	5.36713	5.14165	1	0.0233585
OG0003141	0.11438	18	-4122.3	19	-4122.3	0.11445	0.11343	4.11544	0.000406	1	0.983924
OG0003162	0.01259	18	-1203.43	19	-1203.1	0.01349	0.0001	2.31449	0.661486	1	0.416036
OG0003150	0.37474	18	-4608.65	19	-4608.08	0.38485	0.27184	3.04983	1.13462	1	0.286792
OG0003087	0.05342	18	-2122.13	19	-2121.98	0.05627	0.03225	9.75359	0.29988	1	0.583958
OG0003117	0.11506	18	-3967.52	19	-3963.28	0.12348	0.02124	3.93744	8.48252	1	0.00358575
OG0003112	0.08198	18	-6084.59	19	-6081.93	0.08489	0.02062	3.20232	5.32341	1	0.0210407
OG0003177	0.00456	18	-1298.84	19	-1298.7	0.00479	0.0001	4.59486	0.2783	1	0.597818
OG0003119	0.23505	18	-5327.79	19	-5326.38	0.242	0.11368	3.98324	2.82738	1	0.0926692
OG0003154	0.11523	18	-3963.21	19	-3963.2	0.1147	0.12413	5.76835	0.029546	1	0.863524
OG0003129	0.02712	18	-3052.2	19	-3037.46	0.01366	0.3016	2.9308	29.494	1	5.6e-08
OG0003310	0.26666	18	-1935.91	19	-1935.07	0.28397	0.14225	3.61784	1.6974	1	0.192628
OG0003172	0.22352	18	-4596.74	19	-4596.49	0.22624	0.16251	2.75961	0.512254	1	0.474165
OG0003191	0.19712	18	-2956.95	19	-2956.91	0.1951	0.22038	4.52462	0.082152	1	0.774402
OG0003095	0.14072	18	-4233.89	19	-4230.64	0.14773	0.03146	2.64189	6.49639	1	0.0108094
OG0003169	0.12422	18	-3529.13	19	-3529.1	0.1236	0.14789	3.84134	0.057582	1	0.810359
OG0003176	0.26425	18	-5444.17	19	-5443.6	0.25672	0.35974	3.02553	1.14074	1	0.285496
OG0003109	0.2608	18	-4870.66	19	-4870.42	0.25615	0.32375	4.34468	0.48053	1	0.488182
OG0003149	0.03183	18	-2929.99	19	-2927.95	0.03448	0.0001	2.71461	4.06989	1	0.0436541
OG0003153	0.02747	18	-5430.4	19	-5418.5	0.02168	0.16335	4.83619	23.8148	1	1.061e-06
OG0003151	0.08211	18	-5928.68	19	-5924.07	0.08602	0.0001	3.82423	9.2134	1	0.0024025
OG0003194	0.09028	18	-1666.49	19	-1660.53	0.072	0.66812	4.09229	11.9311	1	0.000552048
OG0003163	0.11771	18	-2461.25	19	-2461.22	0.11871	0.09975	4.67647	0.064794	1	0.799073
OG0003271	0.0464	18	-865.965	19	-865.438	0.05097	0.0001	6.66999	1.05402	1	0.304583
OG0003124	0.04445	18	-3203.56	19	-3203.51	0.04393	0.0543	5.71651	0.083086	1	0.773158
OG0003173	0.17612	18	-5389.27	19	-5387.15	0.18418	0.07695	4.05696	4.23372	1	0.0396285
OG0003200	0.14756	18	-2590.15	19	-2589.21	0.15555	0.08035	4.66551	1.88817	1	0.169409
OG0003142	0.20148	18	-6401.14	19	-6401.14	0.20182	0.19799	4.58871	0.003782	1	0.950963
OG0003273	0.05071	18	-2121.52	19	-2121.52	0.05091	0.04742	4.97044	0.007958	1	0.928917
OG0003309	0.02593	18	-1065.45	19	-1064.62	0.02821	0.0001	3.03417	1.66159	1	0.197389
OG0003218	0.15138	18	-1271.42	19	-1270.84	0.14212	0.29472	2.46108	1.15007	1	0.283534
OG0003326	0.07618	18	-1404.22	19	-1404.19	0.07744	0.06472	4.01476	0.068216	1	0.793952
OG0003125	0.0708	18	-3757.13	19	-3751.99	0.05792	0.27372	4.62265	10.2817	1	0.00134358
OG0003130	0.08734	18	-5697.79	19	-5696.09	0.09092	0.03275	2.56733	3.39583	1	0.0653615
OG0003226	0.16146	18	-1940.88	19	-1940.87	0.16225	0.1543	3.01332	0.01207	1	0.912518
OG0003126	0.01792	18	-5123.21	19	-5122.64	0.01896	0.00726	8.66567	1.13874	1	0.285918
OG0003157	0.02775	18	-3735.29	19	-3734.14	0.02531	0.05401	6.2897	2.30812	1	0.1287
OG0003184	0.6094	18	-5595.49	19	-5595.49	0.60943	0.60911	3.06646	4e-06	1	0.998404
OG0003286	0.02479	18	-2593.82	19	-2592.27	0.02105	0.06167	5.22141	3.11298	1	0.0776708
OG0003185	0.15924	18	-2589.84	19	-2589.61	0.15554	0.21281	6.68182	0.459976	1	0.497635
OG0003156	0.08993	18	-4631.26	19	-4630.78	0.09256	0.0606	3.72555	0.955368	1	0.328357
OG0003174	0.07896	18	-2887.9	19	-2885.85	0.07271	0.21153	3.79476	4.10189	1	0.0428354
OG0003193	0.14437	18	-4210.59	19	-4210.48	0.1424	0.17589	5.28443	0.216314	1	0.641863
OG0003092	0.02276	18	-5264.09	19	-5264.08	0.02284	0.02163	3.82383	0.008744	1	0.925499
OG0003311	0.03548	18	-2194.05	19	-2193.18	0.03719	0.0001	2.84632	1.74001	1	0.187138
OG0003178	0.07009	18	-4201.23	19	-4199.99	0.0736	0.01864	7.23531	2.47741	1	0.115492
OG0003203	0.23937	18	-4517.78	19	-4516.53	0.23023	0.39143	3.14524	2.49563	1	0.114163
OG0003107	0.14005	18	-2707.83	19	-2707.21	0.14755	0.05006	3.03245	1.23107	1	0.267199
OG0003265	0.14426	18	-5740.61	19	-5739.44	0.14843	0.07986	3.72292	2.32918	1	0.126969
OG0003207	0.03227	18	-2793.79	19	-2793.79	0.03227	0.03224		2e-06	1	0.998872
OG0003222	0.1202	18	-2422.97	19	-2422.68	0.11578	0.16582	3.81281	0.590268	1	0.442316
OG0003325	0.01282	18	-1502.26	19	-1502.22	0.01256	0.01744	8.46163	0.083312	1	0.772858
OG0003164	0.05405	18	-5532.44	19	-5532.34	0.05322	0.06485	3.49988	0.204494	1	0.651118
OG0003093	0.04045	18	-4047.37	19	-4047.11	0.04159	0.02314	3.1107	0.53129	1	0.466065
OG0003102	0.04893	18	-3227.12	19	-3226.38	0.0474	0.22824	3.5376	1.48648	1	0.222763
OG0003295	0.19216	18	-3880.62	19	-3880.32	0.18761	0.24686	4.08217	0.588102	1	0.443154
OG0003317	0.2897	18	-6165.21	19	-6165.04	0.28605	0.33641	2.7974	0.340762	1	0.55939
OG0003137	0.06514	18	-4539.8	19	-4539.64	0.06641	0.04915	3.54279	0.313866	1	0.575317
OG0003098	0.0465	18	-3620.37	19	-3620.13	0.04528	0.07488	6.3048	0.489956	1	0.483947
OG0003182	0.15645	18	-4873.95	19	-4873.85	0.15816	0.13264	4.00754	0.18836	1	0.664285
OG0003170	0.1834	18	-5639.28	19	-5639.28	0.18342	0.183	4.59539	3.4e-05	1	0.995348
OG0003216	0.2948	18	-2770.73	19	-2770.69	0.29712	0.25333	2.49702	0.07707	1	0.781308
OG0003324	0.13564	18	-3398.65	19	-3398.62	0.13682	0.1241	4.22089	0.065414	1	0.798135
OG0003122	0.05247	18	-6458	19	-6457.14	0.05452	0.02985	5.26744	1.72458	1	0.189105
OG0003113	0.19049	18	-7736.72	19	-7736.3	0.18737	0.24536	3.43243	0.841086	1	0.359086
OG0003250	0.03004	18	-1732.42	19	-1731.87	0.02792	0.07299	6.08821	1.09397	1	0.295593
OG0003257	0.20495	18	-1377.13	19	-1377.12	0.20422	0.21933	3.07491	0.009288	1	0.923223
OG0003165	0.23015	18	-7640.67	19	-7636.46	0.21738	0.47855	3.65565	8.41924	1	0.00371271
OG0003140	0.04649	18	-5801.4	19	-5801.27	0.04563	0.05739	6.18756	0.253026	1	0.614952
OG0003272	0.0386	18	-3953.54	19	-3952	0.03321	0.10968	3.01486	3.0843	1	0.0790513
OG0003297	0.11559	18	-4417.69	19	-4417.68	0.11614	0.10684	3.90508	0.030962	1	0.860325
OG0003099	0.02649	18	-2880.22	19	-2878.25	0.02899	0.0001	5.31116	3.93182	1	0.0473806
OG0003269	0.11889	18	-5302.98	19	-5301.67	0.12409	0.06585	5.72711	2.6374	1	0.104374
OG0003225	0.12371	18	-3759.53	19	-3758.89	0.12828	0.08122	4.51243	1.28419	1	0.257122
OG0003288	0.1887	18	-4625.09	19	-4625.05	0.18755	0.21245	3.68423	0.088896	1	0.765585
OG0003215	0.09403	18	-2692.23	19	-2692.21	0.09462	0.08419	4.97111	0.031928	1	0.858186
OG0003279	0.04686	18	-4851.92	19	-4851.84	0.04628	0.05575	3.92525	0.168082	1	0.681822
OG0003307	0.08132	18	-3967.93	19	-3967.92	0.08171	0.0758	4.04084	0.0214	1	0.883695
OG0003290	0.02022	18	-2619.75	19	-2615.97	0.01601	0.1324	6.69444	7.54733	1	0.00600992
OG0003278	0.0242	18	-4116.77	19	-4114.95	0.02534	0.0001	3.99269	3.62912	1	0.0567768
OG0003105	0.05189	18	-6995.59	19	-6995.53	0.05232	0.04392	3.41496	0.125756	1	0.722874
OG0003264	0.13623	18	-5064.85	19	-5064.15	0.13224	0.20111	4.99147	1.3972	1	0.237193
OG0003315	0.01415	18	-1569.71	19	-1569.41	0.01461	0.0001	2.94826	0.58782	1	0.443263
OG0003217	0.01401	18	-2907.75	19	-2907.24	0.01496	0.0001	6.49541	1.01773	1	0.313059
OG0003305	0.07323	18	-3489.12	19	-3488.67	0.07077	0.12225	3.50729	0.912016	1	0.33958
OG0003100	0.04313	18	-6829.07	19	-6828.81	0.044	0.03215	5.04985	0.524766	1	0.468816
OG0003240	0.19672	18	-2194.16	19	-2193.18	0.20606	0.09919	3.31394	1.95406	1	0.16215
OG0003296	0.04816	18	-2773.31	19	-2770.74	0.05177	0.0001	3.97469	5.13425	1	0.0234582
OG0003308	0.01241	18	-4006.88	19	-4005.21	0.01349	0.0001	5.18339	3.34975	1	0.0672152
OG0003143	0.14313	18	-5820.68	19	-5819.99	0.14674	0.08761	5.33958	1.37683	1	0.240642
OG0003219	0.19061	18	-5995.7	19	-5994.62	0.19634	0.11754	4.44478	2.15819	1	0.141812
OG0003094	0.03298	18	-6300.69	19	-6300.69	0.03294	0.03366	3.29371	0.00226	1	0.962083
OG0003268	0.17463	18	-2644.17	19	-2642.69	0.18619	0.08427	4.46376	2.96198	1	0.0852433
OG0003303	0.08213	18	-4912.22	19	-4907.53	0.07503	0.25587	3.92372	9.39818	1	0.00217201
OG0003206	0.09194	18	-7066.37	19	-7065.82	0.08947	0.12531	4.65964	1.09595	1	0.295156
OG0003261	0.10362	18	-4488.08	19	-4487.25	0.10797	0.06625	5.14152	1.66887	1	0.19641
OG0003197	0.13729	18	-4520.99	19	-4520.95	0.13635	0.16201	2.25486	0.091492	1	0.762289
OG0003211	0.08279	18	-7245.41	19	-7245.03	0.08104	0.10677	4.8259	0.763876	1	0.382118
OG0003260	0.17016	18	-2832.75	19	-2832.67	0.17241	0.14157	4.14212	0.150996	1	0.697585
OG0003276	0.04966	18	-6152.4	19	-6152.38	0.04994	0.04565	3.21119	0.049288	1	0.824307
OG0003091	0.18944	18	-7733.27	19	-7732.89	0.18585	0.24518	2.85152	0.76477	1	0.38184
OG0003204	0.64201	18	-7455.88	19	-7455.64	0.6312	0.75727	3.19905	0.47224	1	0.491958
OG0003221	0.05376	18	-4490.33	19	-4490.2	0.05303	0.06951	4.74831	0.26065	1	0.609674
OG0003314	0.0756	18	-3444.54	19	-3443.97	0.07766	0.02812	6.43996	1.13681	1	0.286327
OG0003166	0.03648	18	-4582.86	19	-4581.86	0.03767	0.01104	4.59217	1.9978	1	0.157528
OG0003277	0.0811	18	-4379.77	19	-4379.56	0.08366	0.05833	4.4597	0.417784	1	0.518045
OG0003183	0.08752	18	-4362.43	19	-4357.3	0.07729	0.24196	3.71304	10.2622	1	0.00135784
OG0003233	0.01758	18	-2835.24	19	-2835.06	0.0165	0.02741	6.82946	0.356058	1	0.550704
OG0003304	0.04402	18	-6618.82	19	-6618.41	0.04308	0.06749	4.36296	0.806238	1	0.369235
OG0003247	0.08218	18	-3144.35	19	-3140.75	0.08979	0.01146	1.96061	7.19082	1	0.00732775
OG0003244	0.04329	18	-4385.36	19	-4385.26	0.04263	0.05296	3.539	0.203258	1	0.652104
OG0003251	0.05746	18	-3777.73	19	-3776.85	0.05972	0.0185	4.13447	1.76649	1	0.183817
OG0003287	0.04494	18	-4175.7	19	-4174.4	0.04024	0.10819	3.66303	2.60755	1	0.106356
OG0003180	0.12362	18	-4858.21	19	-4858.05	0.12127	0.14896	3.71983	0.327826	1	0.566942
OG0003201	0.04346	18	-3973.07	19	-3968.08	0.03578	0.16626	3.73792	9.97771	1	0.00158447
OG0003262	0.053	18	-5289.3	19	-5287.55	0.05607	0.0204	5.85104	3.50363	1	0.0612343
OG0003223	0.05076	18	-5283.84	19	-5283.79	0.05121	0.04288	4.78958	0.110436	1	0.739648
OG0003283	0.04985	18	-5112.72	19	-5112.02	0.05139	0.0214	5.20591	1.39802	1	0.237055
OG0003312	0.03911	18	-5357.98	19	-5357.8	0.03819	0.05172	5.11979	0.347284	1	0.555655
OG0003198	0.03789	18	-6172.33	19	-6172.24	0.03736	0.0467	3.06147	0.19389	1	0.659699
OG0003205	0.21274	18	-9884.87	19	-9884.72	0.21065	0.23773	4.13227	0.300212	1	0.58375
OG0003224	0.10202	18	-4336.43	19	-4335.95	0.09875	0.15294	4.93706	0.95903	1	0.327431
OG0003246	0.02212	18	-3966.5	19	-3966.33	0.02276	0.01304	4.53388	0.33303	1	0.56388
OG0003291	0.00861	18	-4696.51	19	-4695.91	0.00779	0.02039	3.45071	1.19789	1	0.273743
OG0003213	0.04124	18	-4074.28	19	-4073.76	0.03946	0.06326	2.32484	1.03384	1	0.309259
OG0003242	0.11382	18	-4623.44	19	-4623.33	0.11569	0.09338	3.4111	0.212506	1	0.64481
OG0003239	0.18799	18	-5278.13	19	-5278.11	0.18897	0.17755	4.62392	0.037546	1	0.846358
OG0003220	0.09278	18	-5561.2	19	-5559.7	0.09768	0.0322	4.13037	2.99613	1	0.0834635
OG0003238	0.05878	18	-4648.47	19	-4648.27	0.05766	0.07791	4.09858	0.40961	1	0.522168
OG0003210	0.08111	18	-6559.02	19	-6558.94	0.08188	0.06902	5.76278	0.159478	1	0.689638
OG0003127	0.07168	18	-2620.52	19	-2618.93	0.07701	0.0001	4.12878	3.17657	1	0.0747015
OG0003293	0.0365	18	-4856.15	19	-4854.62	0.03402	0.07413	7.105	3.05558	1	0.0804605
OG0003230	0.12514	18	-7914.18	19	-7914.12	0.12435	0.13841	5.37683	0.118996	1	0.730126
OG0003208	0.08479	18	-7164.34	19	-7163.8	0.08287	0.12604	2.1707	1.08331	1	0.297959
OG0003319	0.06336	18	-4599.28	19	-4598.67	0.06538	0.0001	2.0727	1.23354	1	0.26672
OG0003228	0.04334	18	-6737.27	19	-6733.88	0.03983	0.0958	3.82373	6.77974	1	0.00921983
OG0003144	0.09933	18	-7492.16	19	-7491.77	0.09643	0.13427	5.14234	0.78711	1	0.374975
OG0003232	0.11274	18	-6192.54	19	-6192.27	0.1142	0.08344	3.58621	0.53709	1	0.463641
OG0003234	0.0323	18	-6331.17	19	-6329.82	0.03398	0.00866	4.05996	2.70215	1	0.100213
OG0003284	0.03991	18	-5921.78	19	-5919.47	0.04236	0.0001	2.32855	4.62305	1	0.0315451
OG0003321	0.19088	18	-8203.16	19	-8203.15	0.19116	0.18743	4.59403	0.005076	1	0.943202
OG0003227	0.13897	18	-7143.73	19	-7143.71	0.13821	0.14852	5.6161	0.037636	1	0.846176
OG0003235	0.09682	18	-5660.03	19	-5659.79	0.09892	0.07196	2.69547	0.461258	1	0.497037
OG0003313	0.04507	18	-5369.08	19	-5368.15	0.04818	0.01657	2.18031	1.86923	1	0.171564
OG0003195	0.21493	18	-8966.66	19	-8965.67	0.22067	0.15273	2.21047	1.99101	1	0.158235
OG0003256	0.06674	18	-6224.07	19	-6223.9	0.06564	0.0809	3.01695	0.345206	1	0.55684
OG0003255	0.0894	18	-9984.83	19	-9983.5	0.09136	0.0486	2.27701	2.66089	1	0.102843
OG0003229	0.17767	18	-6911.99	19	-6910.41	0.17171	0.32178	3.45582	3.1726	1	0.0748833
OG0003281	0.04161	18	-7353.43	19	-7353.41	0.0419	0.03795	2.68319	0.044518	1	0.832893
OG0003330	0.18549	18	-1883.31	19	-1883.31	0.18531	0.18903	4.17449	0.001032	1	0.974373
OG0003282	0.09016	18	-6498	19	-6497.62	0.08821	0.12783	4.16444	0.752556	1	0.385668
OG0003349	0.1085	18	-1513.45	19	-1509.87	0.09156	0.44969	2.51182	7.14944	1	0.00749875
OG0003350	0.22143	18	-1527.74	19	-1527	0.22971	0.06749	5.75034	1.46846	1	0.225588
OG0003318	0.18398	18	-6271.5	19	-6270.81	0.17899	0.2743	4.49797	1.37456	1	0.241031
OG0003327	0.17253	18	-2653.67	19	-2650.89	0.18565	0.05515	3.79691	5.55596	1	0.0184178
OG0003339	0.16414	18	-3313.12	19	-3311.28	0.17303	0.0501	2.58082	3.68484	1	0.0549092
OG0003212	0.02922	18	-6453.81	19	-6453.47	0.03041	0.01464	3.29376	0.674276	1	0.411565
OG0003341	0.369	18	-7650.96	19	-7650.08	0.37782	0.25204	3.17531	1.75359	1	0.185426
OG0003334	0.03332	18	-2208.54	19	-2207.63	0.03598	0.0001	5.46013	1.83564	1	0.175462
OG0003343	0.03516	18	-3772.11	19	-3771.55	0.03345	0.06553	5.09404	1.11794	1	0.290363
OG0003345	0.04831	18	-5982.8	19	-5982.75	0.04788	0.05658	2.3469	0.106158	1	0.744561
OG0003333	0.2093	18	-5929.55	19	-5927.46	0.21813	0.10709	3.55302	4.17973	1	0.0409103
OG0003336	0.03334	18	-5027.88	19	-5027.71	0.03417	0.02237	9.14136	0.345356	1	0.556754
OG0003342	0.07098	18	-5112.34	19	-5105.1	0.05811	0.20292	2.68481	14.4891	1	0.000140972
OG0003337	0.1745	18	-7160.45	19	-7160	0.16945	0.24008	4.17735	0.889478	1	0.345619
OG0003362	0.32392	18	-1877.03	19	-1874.99	0.30164	1.11677	3.7088	4.0903	1	0.0431299
OG0003444	0.30132	18	-2887.54	19	-2882.94	0.27218	0.83664	2.32541	9.19956	1	0.00242074
OG0003429	0.09082	18	-1996.1	19	-1995.62	0.0866	0.15485	4.4778	0.963272	1	0.326364
OG0003354	0.13321	18	-1914.13	19	-1914.04	0.12999	0.16152	2.98811	0.173396	1	0.677111
OG0003424	0.05354	18	-1652.53	19	-1650.75	0.04874	0.28744	4.04218	3.54653	1	0.0596701
OG0003434	0.09996	18	-2700.67	19	-2697.12	0.11087	0.02201	4.84205	7.10737	1	0.00767678
OG0003364	0.1381	18	-2322.36	19	-2322.02	0.1424	0.08479	2.33825	0.67327	1	0.411914
OG0003433	0.15651	18	-4364.01	19	-4362.28	0.1481	0.28763	3.98785	3.44786	1	0.0633338
OG0003451	0.00566	18	-2486.24	19	-2486.02	0.00585	0.0001	4.48756	0.44196	1	0.506178
OG0003449	0.04934	18	-2213.34	19	-2210.18	0.0535	0.0001	4.7483	6.32025	1	0.0119367
OG0003501	0.17171	18	-2321.06	19	-2320.88	0.16902	0.24109	3.05394	0.375898	1	0.539807
OG0003507	0.11727	18	-2871.16	19	-2871.1	0.11893	0.10484	4.46279	0.107062	1	0.743514
OG0003460	0.06311	18	-2116.81	19	-2116.38	0.05913	0.11832	4.65205	0.857178	1	0.35453
OG0003387	0.19086	18	-1383.11	19	-1382.43	0.17994	0.34657	2.63964	1.36082	1	0.243395
OG0003518	0.01517	18	-1995.43	19	-1994.57	0.01614	0.0001	2.31831	1.72236	1	0.18939
OG0003491	0.40582	18	-2206.54	19	-2206.21	0.41785	0.26141	2.57209	0.662382	1	0.41572
OG0003373	0.12185	18	-3684.5	19	-3683.93	0.12548	0.07343	4.09441	1.13842	1	0.285986
OG0003445	0.13143	18	-2634.55	19	-2633.3	0.13784	0.04747	3.34571	2.50546	1	0.113452
OG0003438	0.39542	18	-4255.8	19	-4255.45	0.38581	0.56155	2.14593	0.710986	1	0.399117
OG0003432	0.28757	18	-5215.46	19	-5215.46	0.28779	0.28495	3.89077	0.000996	1	0.974823
OG0003442	0.05259	18	-2952.7	19	-2951.23	0.04831	0.1207	5.72643	2.92195	1	0.0873821
OG0003388	0.1832	18	-2164.34	19	-2163.91	0.18906	0.10883	3.91066	0.865096	1	0.352317
OG0003503	0.26582	18	-5030.18	19	-5030.09	0.2683	0.23579	2.78875	0.174738	1	0.675935
OG0003478	0.02544	18	-2750.62	19	-2750.5	0.02474	0.03696	5.67378	0.235882	1	0.627196
OG0003509	0.0871	18	-2207.3	19	-2207.21	0.08601	0.11629	2.97183	0.182294	1	0.669409
OG0003476	0.0544	18	-2138.77	19	-2136.98	0.0575	0.0001	3.91132	3.5727	1	0.0587366
OG0003562	0.17609	18	-930.728	19	-930.472	0.16899	0.36812	4.02724	0.51231	1	0.474141
OG0003455	0.38812	18	-6835.49	19	-6835.47	0.38976	0.36914	2.8279	0.041142	1	0.839264
OG0003472	0.04276	18	-1925.51	19	-1923.72	0.03828	0.14856	4.14102	3.56648	1	0.0589572
OG0003535	0.05917	18	-1361.15	19	-1359.9	0.05146	0.13326	3.26463	2.51705	1	0.112621
OG0003463	0.07578	18	-2384.71	19	-2384.69	0.07511	0.08442	5.24123	0.036062	1	0.849388
OG0003368	0.09555	18	-3777.08	19	-3776.71	0.09329	0.15023	4.91371	0.742824	1	0.388758
OG0003480	0.08731	18	-2424.23	19	-2424.22	0.08692	0.09588	5.48575	0.018926	1	0.890579
OG0003417	0.03719	18	-1404.87	19	-1404.77	0.03628	0.06341	5.56961	0.20516	1	0.650588
OG0003482	0.0783	18	-2657.62	19	-2656.74	0.07448	0.15122	6.55433	1.77058	1	0.18331
OG0003422	0.09844	18	-3949.57	19	-3949.53	0.09776	0.11529	2.63334	0.073314	1	0.786571
OG0003560	0.10789	18	-1676.33	19	-1675.44	0.11328	0.03209	5.56725	1.76821	1	0.183603
OG0003420	0.0993	18	-1167.43	19	-1166.75	0.0932	0.32153	3.71527	1.35571	1	0.244282
OG0003453	0.14011	18	-5270.79	19	-5269.48	0.14585	0.08524	2.49309	2.61088	1	0.106133
OG0003457	0.0415	18	-2795.05	19	-2794.47	0.04006	0.08904	2.91805	1.17356	1	0.278671
OG0003532	0.13451	18	-3136.79	19	-3136.36	0.13799	0.08227	3.30118	0.867786	1	0.351569
OG0003428	0.05642	18	-2179.61	19	-2178.99	0.05302	0.11428	2.78454	1.25354	1	0.262878
OG0003430	0.21973	18	-7429.11	19	-7428.95	0.2167	0.24636	2.91661	0.321242	1	0.570862
OG0003352	0.0159	18	-3173.06	19	-3173.04	0.01603	0.01345	4.8024	0.02851	1	0.865915
OG0003356	0.15347	18	-4347.55	19	-4347.53	0.15272	0.16452	4.04313	0.03382	1	0.85409
OG0003533	0.05954	18	-2611.25	19	-2610.6	0.06321	0.01702	3.89161	1.29897	1	0.254401
OG0003402	0.07255	18	-2478.9	19	-2478.81	0.0742	0.05872	6.51802	0.191312	1	0.661827
OG0003407	0.00874	18	-3251.08	19	-3250.32	0.00756	0.02341	6.26202	1.50992	1	0.219151
OG0003553	0.28105	18	-3749.98	19	-3745.12	0.30182	0.07304	3.74062	9.72595	1	0.00181684
OG0003494	0.02537	18	-2307.82	19	-2307.33	0.02307	0.05463	4.86972	0.979366	1	0.322355
OG0003554	0.03444	18	-1647.53	19	-1647.2	0.03109	0.05681	5.05242	0.656722	1	0.41772
OG0003370	0.02608	18	-2138.2	19	-2138.18	0.02545	0.03352	4.68102	0.058246	1	0.80929
OG0003498	0.16911	18	-2581.77	19	-2581.65	0.16502	0.20989	3.82201	0.232508	1	0.62967
OG0003514	0.00957	18	-3601.92	19	-3600.91	0.01027	0.0001	5.82007	2.0234	1	0.154892
OG0003419	0.04327	18	-3093.33	19	-3093.18	0.04349	0.0001	5.21297	0.284892	1	0.593513
OG0003522	0.23592	18	-2883.64	19	-2882.92	0.24468	0.11366	2.01199	1.44583	1	0.229198
OG0003466	0.05559	18	-3822.16	19	-3822.09	0.05641	0.04612	6.17888	0.128014	1	0.7205
OG0003394	0.06231	18	-3740.37	19	-3740.22	0.06334	0.04686	4.34528	0.303158	1	0.581909
OG0003413	0.18407	18	-3897.45	19	-3897.43	0.18502	0.16978	4.11386	0.043518	1	0.834753
OG0003519	0.12895	18	-3109.44	19	-3109.33	0.12711	0.16322	4.17945	0.209714	1	0.646992
OG0003393	0.05189	18	-2294.99	19	-2292.06	0.05842	0.0001	3.03485	5.86677	1	0.0154293
OG0003488	0.08144	18	-2350.57	19	-2348.69	0.072	0.2792	4.61008	3.75853	1	0.0525388
OG0003437	0.09416	18	-4224.38	19	-4224.27	0.09264	0.11763	6.78816	0.22744	1	0.633429
OG0003409	0.17558	18	-2500.93	19	-2498.53	0.16252	0.58132	2.38823	4.80243	1	0.0284197
OG0003536	0.54427	18	-3035.08	19	-3034.89	0.53143	0.69193	2.32308	0.385098	1	0.534887
OG0003461	0.09767	18	-5239.54	19	-5238.84	0.10012	0.05874	2.91008	1.39728	1	0.237179
OG0003443	0.04489	18	-4042.49	19	-4042.02	0.04651	0.02371	2.37523	0.948114	1	0.3302
OG0003372	0.06097	18	-3161.44	19	-3158.02	0.0554	0.35902	1.94719	6.8454	1	0.00888696
OG0003552	0.01828	18	-2002.91	19	-2002.32	0.01905	0.0001	2.10988	1.17365	1	0.278653
OG0003412	0.27608	18	-3883.3	19	-3881.44	0.28894	0.12158	3.19891	3.71019	1	0.0540813
OG0003477	0.18681	18	-5327.03	19	-5326.22	0.19186	0.11746	4.08241	1.61383	1	0.203954
OG0003439	0.15237	18	-6014.77	19	-6012.36	0.14501	0.2863	3.32978	4.81151	1	0.0282702
OG0003543	0.01596	18	-3225.89	19	-3224.35	0.01733	0.0001	9.81219	3.07432	1	0.0795379
OG0003400	0.13156	18	-4837.37	19	-4837.35	0.13102	0.14091	3.64127	0.034042	1	0.853618
OG0003404	0.11583	18	-2587.41	19	-2587.37	0.11712	0.10189	5.53461	0.08977	1	0.76447
OG0003540	0.05722	18	-2512.06	19	-2512.03	0.05673	0.07205	5.07997	0.06927	1	0.792403
OG0003541	0.16351	18	-3326.23	19	-3326.19	0.16512	0.14535	3.51569	0.084832	1	0.770853
OG0003568	0.29358	18	-4341.34	19	-4340.94	0.30207	0.23028	3.67493	0.797062	1	0.371973
OG0003576	0.11083	18	-2789.79	19	-2789.46	0.10655	0.16036		0.665104	1	0.414764
OG0003547	0.02939	18	-2433.57	19	-2432.13	0.03101	0.0001	7.49792	2.89422	1	0.088898
OG0003571	0.14989	18	-3015.74	19	-3015.7	0.14898	0.17777	4.8333	0.078358	1	0.779535
OG0003506	0.02967	18	-1958.91	19	-1956.74	0.02305	0.10605	1.85991	4.33771	1	0.0372771
OG0003374	0.11347	18	-5791.28	19	-5789.55	0.10751	0.19091	5.35805	3.46695	1	0.0626065
OG0003408	0.11974	18	-4462.39	19	-4461.89	0.11652	0.17113	5.55155	1.00895	1	0.315154
OG0003415	0.09292	18	-2854.78	19	-2854.75	0.09369	0.08142	2.6384	0.046784	1	0.828757
OG0003511	0.18596	18	-2194.75	19	-2194.54	0.18241	0.3062	2.89363	0.41728	1	0.518297
OG0003513	0.03044	18	-3273.92	19	-3271.54	0.03318	0.0001	5.63164	4.77497	1	0.0288764
OG0003569	0.01292	18	-2460.02	19	-2459.25	0.0139	0.0001	4.09617	1.5326	1	0.215723
OG0003383	0.03094	18	-2969.17	19	-2969.11	0.03049	0.03888	3.40987	0.129322	1	0.719136
OG0003397	0.36535	18	-5174.91	19	-5174.91	0.36539	0.36501	3.24261	1.2e-05	1	0.997236
OG0003529	0.01032	18	-4273.31	19	-4273.3	0.01028	0.01103	7.18413	0.004376	1	0.947257
OG0003381	0.05087	18	-2354.61	19	-2352.23	0.05402	0.0001	4.8795	4.75841	1	0.0291555
OG0003508	0.10223	18	-2309.54	19	-2309.53	0.10201	0.10587	3.67614	0.002836	1	0.957529
OG0003386	0.147	18	-3088.41	19	-3088.35	0.14855	0.12559	4.03618	0.121756	1	0.727138
OG0003525	0.12203	18	-4531.01	19	-4530.79	0.12384	0.08805	5.53103	0.450942	1	0.501888
OG0003462	0.06446	18	-5530.09	19	-5530.08	0.06465	0.06126	4.23723	0.013188	1	0.908573
OG0003585	0.41402	18	-7392.34	19	-7392.33	0.4125	0.43414	3.06047	0.036376	1	0.848741
OG0003502	0.07266	18	-4410.87	19	-4410.83	0.07309	0.06245	3.63784	0.070032	1	0.79129
OG0003497	0.01679	18	-3563.66	19	-3563.06	0.01547	0.04133	3.97229	1.19618	1	0.274086
OG0003566	0.17492	18	-2022.84	19	-2022.67	0.17208	0.30838	3.22007	0.350674	1	0.553732
OG0003353	0.06776	18	-5718.68	19	-5718.65	0.06832	0.06231	1.99087	0.06921	1	0.792491
OG0003385	0.03496	18	-2263.55	19	-2261.76	0.03034	0.11482	5.50545	3.58182	1	0.0584151
OG0003414	0.05058	18	-4993.95	19	-4992.6	0.04811	0.10007	3.76365	2.69606	1	0.100596
OG0003471	0.01733	18	-5289.1	19	-5286.55	0.01855	0.0001	3.44003	5.09897	1	0.02394
OG0003363	0.1611	18	-4582.34	19	-4576.64	0.15097	1.00309	5.39418	11.3955	1	0.000736236
OG0003390	0.03957	18	-4192.65	19	-4191.96	0.04094	0.0144	2.33305	1.38654	1	0.23899
OG0003531	0.12603	18	-5079.29	19	-5076.97	0.11903	0.23704	2.54753	4.64476	1	0.0311485
OG0003559	0.04636	18	-3656.29	19	-3655.86	0.04481	0.0801	4.912	0.858206	1	0.354241
OG0003483	0.18402	18	-7617.87	19	-7615.6	0.17625	0.32882	5.28789	4.55109	1	0.0328977
OG0003493	0.15728	18	-6603.92	19	-6603.71	0.15979	0.13191	6.45086	0.426004	1	0.513956
OG0003565	0.17496	18	-4836.84	19	-4836.75	0.17353	0.20716	3.71075	0.175988	1	0.674844
OG0003505	0.0571	18	-4393.1	19	-4392.22	0.05466	0.15263	3.8049	1.7663	1	0.183841
OG0003481	0.15516	18	-7718.67	19	-7718.67	0.15529	0.15372	3.40988	0.001504	1	0.969065
OG0003593	0.23071	18	-3225.52	19	-3225.32	0.23603	0.169	2.72279	0.388144	1	0.533277
OG0003510	0.10119	18	-4589.34	19	-4588.17	0.10467	0.04886	3.96	2.33334	1	0.12663
OG0003369	0.17583	18	-6885.09	19	-6884.57	0.18048	0.13785	4.13692	1.03885	1	0.308089
OG0003405	0.11348	18	-7142.15	19	-7142.14	0.11385	0.10882	5.04057	0.022248	1	0.881429
OG0003581	0.05956	18	-3591.27	19	-3591.17	0.05865	0.0787	3.74505	0.185198	1	0.666944
OG0003592	0.07402	18	-2877.89	19	-2876.37	0.07911	0.01809	4.16536	3.04562	1	0.0809552
OG0003572	0.05744	18	-2606.51	19	-2605.97	0.05477	0.13421	3.28067	1.08647	1	0.297254
OG0003446	0.01694	18	-4614.6	19	-4612.2	0.01931	0.0001	4.56907	4.80694	1	0.0283453
OG0003517	0.13551	18	-6125.68	19	-6125.51	0.13738	0.11033	6.43414	0.34313	1	0.558028
OG0003591	0.17453	18	-6306.64	19	-6306.6	0.17573	0.15878	5.12246	0.094956	1	0.757969
OG0003380	0.16987	18	-5231.32	19	-5231.13	0.17268	0.13933	4.81295	0.389102	1	0.532772
OG0003537	0.04151	18	-3231.93	19	-3231.87	0.04106	0.05142	3.15833	0.110406	1	0.739682
OG0003436	0.07716	18	-6855.02	19	-6852.8	0.06684	0.13875	3.15778	4.43795	1	0.0351485
OG0003544	0.11249	18	-5524.62	19	-5524.47	0.11118	0.14244	3.32122	0.30866	1	0.578504
OG0003534	0.16334	18	-5413.62	19	-5413.37	0.16014	0.19766	3.6223	0.50347	1	0.477979
OG0003516	0.12431	18	-9137.46	19	-9137.31	0.12317	0.14318	3.23219	0.298238	1	0.584989
OG0003586	0.15131	18	-3244.6	19	-3244.51	0.14831	0.21068	5.11469	0.183856	1	0.66808
OG0003557	0.06561	18	-4281.64	19	-4281.52	0.06441	0.08396	2.95929	0.23829	1	0.625444
OG0003530	0.03293	18	-6293.67	19	-6291.41	0.0355	0.00675	2.82174	4.51275	1	0.0336431
OG0003523	0.27607	18	-3651.51	19	-3648.66	0.25668	0.95308	2.47399	5.71027	1	0.016866
OG0003454	0.07381	18	-6674.95	19	-6674.69	0.07221	0.09456	2.39517	0.51849	1	0.471487
OG0003487	0.11819	18	-7476.54	19	-7476.17	0.11585	0.15169	5.88843	0.727206	1	0.39379
OG0003416	0.0499	18	-3983.14	19	-3980.31	0.05345	0.00888	5.32732	5.67126	1	0.0172451
OG0003406	0.15401	18	-8365.05	19	-8365.02	0.15331	0.16351	4.44144	0.061816	1	0.803648
OG0003546	0.20478	18	-4028.83	19	-4028.6	0.19998	0.25634	5.38694	0.454996	1	0.499972
OG0003526	0.04293	18	-2786.94	19	-2786.93	0.04306	0.04073	3.34996	0.004986	1	0.943707
OG0003587	0.05229	18	-4690.63	19	-4689.29	0.05081	0.15766	2.37542	2.67353	1	0.102029
OG0003421	0.01003	18	-3652.38	19	-3651.68	0.01071	0.0001	3.10122	1.40055	1	0.236631
OG0003555	0.10104	18	-7416.32	19	-7416.1	0.09913	0.12253	4.31598	0.43168	1	0.511166
OG0003567	0.08212	18	-5276.01	19	-5275.32	0.07965	0.12897	6.87774	1.374	1	0.241126
OG0003378	0.07385	18	-7272.16	19	-7270.78	0.07536	0.02518	3.80143	2.76773	1	0.0961826
OG0003465	0.09739	18	-4663.46	19	-4662.29	0.10324	0.05335	4.73861	2.34244	1	0.125892
OG0003371	0.10117	18	-7780.34	19	-7779.37	0.09652	0.14725	3.60635	1.95041	1	0.162543
OG0003635	0.32485	18	-1807.5	19	-1805.72	0.34112	0.05714	3.38135	3.5638	1	0.0590526
OG0003604	0.27903	18	-2326.23	19	-2326.06	0.2738	0.38264	3.40434	0.338112	1	0.560921
OG0003606	0.03145	18	-2081.96	19	-2081.27	0.03303	0.0001	3.89053	1.37475	1	0.240997
OG0003470	0.10276	18	-7128.9	19	-7128.79	0.10151	0.12434	3.13288	0.2197	1	0.639269
OG0003658	0.43424	18	-2829.24	19	-2829.13	0.44075	0.34341	3.58577	0.231472	1	0.630435
OG0003360	0.03804	18	-7432.64	19	-7431.78	0.03932	0.01299	3.51628	1.7143	1	0.190429
OG0003602	0.33254	18	-4102.34	19	-4101.1	0.31832	0.56532	2.64178	2.47853	1	0.11541
OG0003656	0.3331	18	-4149.98	19	-4149.97	0.33169	0.35293	2.78182	0.026364	1	0.871015
OG0003599	0.08542	18	-1817.05	19	-1816.57	0.08812	0.03368	4.08324	0.97092	1	0.324451
OG0003595	0.04934	18	-2828.1	19	-2825.59	0.05435	0.0001	4.4327	5.0086	1	0.0252217
OG0003621	0.02745	18	-1937.38	19	-1937.07	0.02885	0.01193	4.98794	0.627984	1	0.428096
OG0003659	0.06927	18	-2638.59	19	-2638.59	0.06934	0.06796	2.74117	0.000596	1	0.980523
OG0003613	0.05271	18	-2834.85	19	-2834.61	0.05417	0.03255	5.17624	0.484276	1	0.486492
OG0003608	0.11053	18	-3190.74	19	-3188.09	0.11948	0.01902	3.31912	5.30184	1	0.021303
OG0003648	0.0086	18	-2046.75	19	-2046.27	0.00949	0.0001	3.87905	0.950652	1	0.329553
OG0003618	0.36123	18	-4637.64	19	-4636.8	0.35096	0.56831	3.5004	1.69667	1	0.192724
OG0003609	0.03232	18	-3685.08	19	-3683.1	0.03425	0.0001	2.02225	3.9529	1	0.0467907
OG0003640	0.09635	18	-2847.56	19	-2847.41	0.09491	0.12956	2.60333	0.3037	1	0.581572
OG0003628	0.1574	18	-1911.14	19	-1911.11	0.1567	0.23071	2.34197	0.0507	1	0.82185
OG0003660	0.08375	18	-4438.2	19	-4436.4	0.08806	0.02632	3.00676	3.61096	1	0.0574
OG0003601	0.08753	18	-3019.79	19	-3017.81	0.08025	0.17352	2.78756	3.95775	1	0.0466561
OG0003657	0.0689	18	-3829.65	19	-3829.54	0.07019	0.0563	6.03471	0.214462	1	0.643292
OG0003637	0.25312	18	-4608.52	19	-4605.99	0.26375	0.09614	2.8276	5.06135	1	0.0244651
OG0003633	0.19794	18	-5167	19	-5166.42	0.20318	0.14113	5.66813	1.15823	1	0.281832
OG0003603	0.09331	18	-6310.87	19	-6308.61	0.09762	0.02969	3.46812	4.52139	1	0.0334737
OG0003654	0.05286	18	-3587.89	19	-3586.47	0.05819	0.0001	3.18634	2.84744	1	0.0915197
OG0003611	0.16327	18	-4358.48	19	-4358.45	0.16428	0.14976	3.76985	0.059338	1	0.807545
OG0003634	0.08354	18	-3359.43	19	-3359.4	0.08384	0.06497	3.07237	0.055622	1	0.813554
OG0003617	0.04019	18	-4708.26	19	-4708.15	0.0397	0.04997	3.68626	0.226916	1	0.63382
OG0003616	0.13587	18	-5132.76	19	-5132.64	0.13749	0.11353	3.97074	0.230144	1	0.631417
OG0003655	0.04869	18	-3967.16	19	-3966.3	0.04661	0.08873	5.73672	1.72022	1	0.189665
OG0003610	0.17552	18	-4138.68	19	-4134.33	0.18848	0.04861	2.20395	8.68771	1	0.00320364
OG0003649	0.06149	18	-4623.54	19	-4623.54	0.06151	0.06123	3.20991	2.2e-05	1	0.996258
OG0003650	0.12889	18	-3877.47	19	-3877.32	0.13132	0.10712	6.75282	0.30423	1	0.581243
OG0003625	0.05101	18	-4384.01	19	-4381.18	0.05497	0.01063	5.81901	5.66517	1	0.0173051
OG0003596	0.05671	18	-4392.16	19	-4389.98	0.05395	0.1922	5.14689	4.36862	1	0.0366067
OG0003614	0.07736	18	-4812.02	19	-4810.95	0.07459	0.15186	4.11921	2.15542	1	0.142068
OG0003652	0.01902	18	-3520.94	19	-3519.66	0.02068	0.0001	2.58012	2.54966	1	0.110318
OG0003632	0.04205	18	-4188.59	19	-4188.25	0.04076	0.07383	4.08364	0.672632	1	0.412135
OG0003661	0.25191	18	-7251.98	19	-7251.97	0.25231	0.2476	3.50682	0.00491	1	0.944137
OG0003653	0.11499	18	-5504.18	19	-5501.72	0.10791	0.28321	2.81496	4.91112	1	0.0266844
OG0003626	0.10791	18	-4613.57	19	-4613.51	0.10669	0.12076	5.82072	0.119248	1	0.729852
OG0003631	0.06953	18	-6424.53	19	-6423.24	0.07231	0.03468	4.55846	2.58498	1	0.107882
OG0003651	0.03484	18	-6651.03	19	-6650.8	0.03566	0.02221	3.98625	0.461372	1	0.496983
OG0003639	0.02493	18	-4468.76	19	-4468.67	0.02445	0.0315	6.77543	0.192838	1	0.660565
OG0003636	0.20732	18	-6047.03	19	-6046.91	0.20561	0.25395	3.41656	0.244616	1	0.620892
OG0003642	0.01766	18	-5640.81	19	-5638.9	0.01555	0.04967		3.81686	1	0.0507392
OG0003647	0.03947	18	-5347.2	19	-5346.22	0.04097	0.01619	5.71248	1.94924	1	0.162668
OG0003643	0.14824	18	-8101.21	19	-8100.76	0.14544	0.19202	4.56463	0.906588	1	0.341021
OG0003646	0.09543	18	-6694.39	19	-6694.35	0.09469	0.10676	4.56791	0.071538	1	0.78911
OG0003662	0.26774	18	-1434.13	19	-1433.14	0.24725	0.47463	2.53827	1.98689	1	0.158666
OG0003624	0.05184	18	-5427.11	19	-5426.13	0.0493	0.1209	3.7095	1.96189	1	0.161311
OG0003666	0.04511	18	-2607.98	19	-2607.14	0.04154	0.09575	2.99098	1.67998	1	0.194927
OG0003687	0.11171	18	-1682.8	19	-1682.8	0.11118	0.11566	4.72871	0.005914	1	0.938701
OG0003683	0.09524	18	-1776.36	19	-1773.44	0.10573	0.01439	3.80366	5.83813	1	0.0156825
OG0003680	0.08676	18	-3288.9	19	-3287.25	0.08208	0.17272	2.48319	3.29886	1	0.0693282
OG0003665	0.12198	18	-4140.34	19	-4138.06	0.12764	0.04271	3.77967	4.57554	1	0.0324315
OG0003675	0.08515	18	-3261.44	19	-3261.25	0.08728	0.06508	2.37574	0.38383	1	0.535561
OG0003688	0.10137	18	-3625.32	19	-3623.88	0.1058	0.03879	3.14201	2.88011	1	0.0896797
OG0003692	0.22664	18	-6040.29	19	-6032	0.20828	1.0936	4.30022	16.577	1	4.6713e-05
OG0003671	0.0928	18	-5579.53	19	-5578.94	0.08985	0.12813	5.60275	1.17841	1	0.277681
OG0003674	0.13219	18	-3055.46	19	-3055.38	0.13411	0.10451	1.21957	0.155188	1	0.693626
OG0003668	0.04397	18	-4320.09	19	-4319	0.0465	0.01321	2.34329	2.18161	1	0.139668
OG0003684	0.19966	18	-4274.28	19	-4271.11	0.18583	0.45265	4.2497	6.33107	1	0.0118641
OG0003679	0.0637	18	-6014.86	19	-6014.51	0.06252	0.08816	2.34849	0.700538	1	0.402603
OG0003664	0.31716	18	-8979.79	19	-8977.91	0.32833	0.20495	3.53436	3.76087	1	0.0524654
OG0003670	0.0559	18	-6068.65	19	-6062.98	0.06069	0.0001	5.11512	11.3539	1	0.000752885
OG0003690	0.03455	18	-3053.41	19	-3052.66	0.03549	0.0001	4.47475	1.51108	1	0.218974
OG0003682	0.06415	18	-5306.52	19	-5306.43	0.06335	0.07672	5.21573	0.189868	1	0.663027
OG0003685	0.20455	18	-9887.24	19	-9887.15	0.20329	0.22889	3.18878	0.192478	1	0.660862
OG0003691	0.07689	18	-7056.31	19	-7056.14	0.07586	0.09448	4.94343	0.338932	1	0.560446
OG0003724	0.01813	18	-1337.27	19	-1337.02	0.01914	0.0001	5.50281	0.517514	1	0.471904
OG0003723	0.14579	18	-2127.09	19	-2127.07	0.14692	0.13194	4.26014	0.045188	1	0.831659
OG0003736	0.0001	18	-792.536	19	-792.536	0.0001	0.0001	2.85357	0	1	1
OG0003709	0.12087	18	-2445.9	19	-2443.91	0.12994	0.02189	3.30166	3.98723	1	0.0458464
OG0003727	0.08679	18	-1524.81	19	-1524.37	0.09172	0.03604	1.54885	0.885274	1	0.346761
OG0003734	0.00468	18	-1053.2	19	-1053.13	0.00501	0.0001	2.66438	0.130976	1	0.717422
OG0003686	0.04687	18	-4995.02	19	-4994.84	0.04606	0.06589	4.75458	0.36093	1	0.54799
OG0003738	0.25293	18	-3034.91	19	-3034.66	0.25821	0.18412	3.38743	0.50411	1	0.4777
OG0003698	0.03405	18	-3397.14	19	-3394.82	0.0364	0.0001	2.74906	4.63827	1	0.0312665
OG0003740	0.03113	18	-2516.19	19	-2514.07	0.03296	0.0001	3.79602	4.23384	1	0.0396257
OG0003733	0.02832	18	-1773.4	19	-1771.18	0.03198	0.0001	4.81486	4.44825	1	0.034937
OG0003694	0.33454	18	-2228.95	19	-2227.64	0.3485	0.06783	3.90655	2.62884	1	0.104938
OG0003711	0.18961	18	-4528.2	19	-4527.73	0.18534	0.26812	4.29204	0.93298	1	0.33409
OG0003706	0.08472	18	-3079.38	19	-3079.38	0.08483	0.08332	7.12849	0.000746	1	0.97821
OG0003708	0.06214	18	-3829.41	19	-3827.62	0.06589	0.02359	2.80136	3.57537	1	0.0586425
OG0003705	0.01852	18	-1580.58	19	-1580.58	0.01851	0.01862	2.76188	3e-05	1	0.99563
OG0003712	0.04189	18	-2311.05	19	-2309.57	0.04456	0.0001	2.67777	2.95098	1	0.0858256
OG0003719	0.15214	18	-5765.08	19	-5764.13	0.14721	0.22256	3.24338	1.89717	1	0.168396
OG0003725	0.07408	18	-6341.35	19	-6340.17	0.07098	0.11953	3.62673	2.35146	1	0.125166
OG0003722	0.35272	18	-7049.36	19	-7042.59	0.37227	0.08669	3.44477	13.5552	1	0.000231644
OG0003702	0.06791	18	-2294.6	19	-2294.53	0.06688	0.08198	4.45274	0.12147	1	0.727446
OG0003729	0.17953	18	-4804.23	19	-4803.79	0.18239	0.11167	3.25656	0.888668	1	0.345839
OG0003701	0.29773	18	-5026.61	19	-5026.61	0.29774	0.29757	2.48447	4e-06	1	0.998404
OG0003710	0.09907	18	-4330.81	19	-4330.77	0.09847	0.12342	4.38077	0.091054	1	0.762841
OG0003735	0.06164	18	-4594.44	19	-4593.66	0.06447	0.03136	7.53407	1.56133	1	0.21147
OG0003741	0.17027	18	-4753.56	19	-4752.84	0.1755	0.11205	4.77862	1.45669	1	0.227458
OG0003742	0.10086	18	-3844.12	19	-3844.09	0.10013	0.12056	7.56909	0.065728	1	0.797662
OG0003721	0.05314	18	-6017.12	19	-6014.84	0.04919	0.10327	6.50293	4.55493	1	0.0328241
OG0003716	0.09849	18	-7202.73	19	-7202.6	0.09775	0.1319	4.4069	0.272934	1	0.60137
OG0003700	0.09193	18	-4419.91	19	-4419.19	0.08821	0.16315	3.92571	1.43219	1	0.231407
OG0003707	0.05576	18	-4857.53	19	-4856.73	0.05271	0.09713	3.96818	1.61385	1	0.203952
OG0003743	0.03614	18	-6871.09	19	-6870.71	0.03694	0.01651	2.37786	0.762784	1	0.382459
OG0003704	0.03321	18	-5924.58	19	-5923.95	0.03437	0.01263	2.35656	1.27171	1	0.259446
OG0003715	0.06201	18	-7711.45	19	-7709.05	0.06663	0.024	3.90854	4.80257	1	0.0284173
OG0003747	0.01899	18	-1726.57	19	-1725.92	0.02003	0.0001	5.74214	1.29844	1	0.254498
OG0003763	0.23662	18	-1538.82	19	-1538.48	0.22978	0.4242	6.1452	0.691704	1	0.405585
OG0003760	0.008	18	-1611.14	19	-1610.9	0.00869	0.0001	4.68404	0.482624	1	0.487236
OG0003750	0.25089	18	-2037.5	19	-2036.72	0.23652	0.42259	5.09545	1.57046	1	0.21014
OG0003828	0.10667	18	-1090.82	19	-1088.01	0.11629	0.0001	3.65428	5.625	1	0.0177061
OG0003798	0.14451	18	-1580.9	19	-1580.77	0.14139	0.19657	4.9582	0.262614	1	0.60833
OG0003745	0.01132	18	-3914.14	19	-3914.14	0.01131	0.01164	5.12375	0.00066	1	0.979504
OG0003811	0.01407	18	-1389.64	19	-1389.3	0.01511	0.0001	5.15422	0.6839	1	0.408247
OG0003833	0.52693	18	-1969.06	19	-1969	0.5333	0.44123	2.82449	0.123392	1	0.725384
OG0003769	0.12674	18	-2264.05	19	-2263.99	0.12882	0.10781	4.67934	0.12965	1	0.718795
OG0003821	0.11472	18	-1257.54	19	-1257.54	0.11411	0.12202	5.77562	0.007892	1	0.929212
OG0003799	0.1092	18	-1510.22	19	-1509.25	0.11615	0.03191	3.94642	1.92959	1	0.164804
OG0003775	0.16284	18	-2110.82	19	-2108.56	0.14969	0.47049	2.45465	4.51486	1	0.0336017
OG0003824	0.34123	18	-2359.59	19	-2358.89	0.35752	0.21397	3.52873	1.40545	1	0.235814
OG0003764	0.0514	18	-3326.94	19	-3326.21	0.05301	0.01743	4.66407	1.4717	1	0.225078
OG0003844	0.03465	18	-2944.33	19	-2942.86	0.03782	0.0001	5.87277	2.95233	1	0.0857538
OG0003813	0.03051	18	-1423.8	19	-1422.46	0.02681	0.10248	2.62969	2.68579	1	0.101247
OG0003788	0.10222	18	-1682.81	19	-1682.18	0.10823	0.03567	2.14582	1.26288	1	0.261106
OG0003767	0.07518	18	-4238.33	19	-4237.64	0.07769	0.04368	4.59965	1.37696	1	0.240619
OG0003801	0.03275	18	-1248.12	19	-1248.12	0.03275	0.03279	3.90099	2e-06	1	0.998872
OG0003754	0.06297	18	-4583.04	19	-4583.02	0.06256	0.06969	1.96961	0.038522	1	0.844399
OG0003819	0.10379	18	-2380.8	19	-2376.2	0.11409	0.0001	5.32794	9.18845	1	0.00243546
OG0003757	0.10501	18	-5363.62	19	-5363.49	0.10645	0.08634	5.54798	0.255656	1	0.61312
OG0003838	0.0044	18	-1863.75	19	-1863.43	0.00517	0.0001	4.44251	0.629146	1	0.427669
OG0003776	0.0946	18	-3445.33	19	-3445.11	0.09271	0.13271	4.0088	0.435168	1	0.509464
OG0003779	0.14353	18	-4147.22	19	-4146.59	0.14803	0.09156	5.5555	1.27257	1	0.259285
OG0003872	0.23875	18	-2081.03	19	-2080.87	0.24408	0.184	4.12534	0.317108	1	0.573351
OG0003749	0.11849	18	-4560	19	-4559.04	0.11342	0.17999	3.76377	1.92396	1	0.165421
OG0003777	0.10606	18	-3685.03	19	-3684.96	0.10726	0.0895	7.20503	0.152026	1	0.696607
OG0003748	0.04042	18	-4333.34	19	-4333.34	0.04052	0.03864	5.2945	0.003786	1	0.950937
OG0003871	0.10127	18	-2486.53	19	-2483.94	0.11242	0.0001	3.17358	5.17039	1	0.0229751
OG0003772	0.07318	18	-4278.23	19	-4278.17	0.07243	0.08335	3.06532	0.119442	1	0.72964
OG0003803	0.17283	18	-1771.31	19	-1771.01	0.18059	0.11716	2.46315	0.60546	1	0.436502
OG0003841	0.04147	18	-3339.64	19	-3338.91	0.04424	0.01941	2.87399	1.46455	1	0.226208
OG0003830	0.25079	18	-3981.83	19	-3981.19	0.25905	0.17023	4.31572	1.26609	1	0.260502
OG0003805	0.02631	18	-1885.91	19	-1885.05	0.02267	0.06297	5.50006	1.70713	1	0.191358
OG0003797	0.29932	18	-4840.23	19	-4837.5	0.28205	0.58767	2.4629	5.46018	1	0.0194546
OG0003761	0.11343	18	-8635.89	19	-8635.89	0.11334	0.11457	3.17924	0.001562	1	0.968474
OG0003814	0.17734	18	-5433.54	19	-5432.9	0.1815	0.11721	4.02957	1.26702	1	0.260327
OG0003758	0.10939	18	-8236.87	19	-8236.86	0.10908	0.1145	3.59524	0.024048	1	0.876763
OG0003800	0.07055	18	-4620.58	19	-4619.24	0.06602	0.11921	6.27507	2.68384	1	0.101371
OG0003816	0.12993	18	-4598.91	19	-4598.83	0.13111	0.11089	4.33976	0.16911	1	0.680904
OG0003822	0.02007	18	-1810.19	19	-1806.56	0.01346	0.07457	2.46535	7.25326	1	0.00707726
OG0003854	0.24321	18	-3714.49	19	-3712.84	0.25313	0.07064	4.09671	3.28881	1	0.0697534
OG0003875	0.2481	18	-2611.89	19	-2611.89	0.24785	0.25414	3.68404	0.001284	1	0.971416
OG0003870	0.07066	18	-2550.65	19	-2550.58	0.07204	0.05942	4.20256	0.135312	1	0.712987
OG0003806	0.13306	18	-4960.35	19	-4957.64	0.1399	0.0487	3.93758	5.41198	1	0.019999
OG0003865	0.0255	18	-2145.94	19	-2144.8	0.02763	0.0001	3.53636	2.27212	1	0.131719
OG0003877	0.22623	18	-4585.8	19	-4585.56	0.23013	0.18297	2.42204	0.468302	1	0.493769
OG0003880	0.12572	18	-4015.37	19	-4013.33	0.11928	0.26339	2.56606	4.06615	1	0.0437508
OG0003815	0.13906	18	-2780.33	19	-2779.77	0.14432	0.06646	2.71379	1.12582	1	0.288669
OG0003781	0.05601	18	-3556.04	19	-3555.96	0.0571	0.04174	3.48928	0.175408	1	0.67535
OG0003774	0.11476	18	-4299.12	19	-4299.12	0.11491	0.1117	5.97338	0.003514	1	0.95273
OG0003846	0.00852	18	-2608.47	19	-2608.01	0.00899	0.0001	5.3909	0.922756	1	0.336752
OG0003858	0.00855	18	-2007.2	19	-2007.03	0.00886	0.0001	5.63149	0.342608	1	0.558328
OG0003883	0.11572	18	-3000.47	19	-3000.42	0.11681	0.09969	4.66671	0.089462	1	0.764862
OG0003843	0.25164	18	-5464.61	19	-5462.46	0.26185	0.11626	2.82257	4.30759	1	0.0379428
OG0003826	0.0167	18	-3751.96	19	-3751.13	0.01745	0.0001	3.50727	1.67682	1	0.195347
OG0003786	0.08284	18	-3392.58	19	-3390.63	0.08782	0.02873	4.63662	3.89805	1	0.0483422
OG0003874	0.13262	18	-3236.9	19	-3236.23	0.13889	0.06687	1.80895	1.34189	1	0.246701
OG0003845	0.10091	18	-5335.2	19	-5334.51	0.10279	0.04827	5.03255	1.3809	1	0.239947
OG0003853	0.07742	18	-4087.46	19	-4087.31	0.07834	0.05198	5.2958	0.28197	1	0.595413
OG0003850	0.11427	18	-4385.62	19	-4385.44	0.11232	0.13952	3.90821	0.348968	1	0.554698
OG0003825	0.05491	18	-6090.41	19	-6090.41	0.05501	0.05323	3.86609	0.005256	1	0.942205
OG0003840	0.05138	18	-4809.09	19	-4809.04	0.05072	0.06098	4.36595	0.10393	1	0.747163
OG0003860	0.10358	18	-4530.4	19	-4530.4	0.1033	0.10604	5.88647	0.00533	1	0.941801
OG0003882	0.17996	18	-6729.35	19	-6727.63	0.17187	0.28017	3.91804	3.44542	1	0.0634271
OG0003790	0.08453	18	-5551.12	19	-5551.12	0.08431	0.08761	4.8695	0.007518	1	0.930905
OG0003867	0.05618	18	-4980.98	19	-4980.36	0.05846	0.02225	3.36548	1.229	1	0.267602
OG0003794	0.15307	18	-7780.13	19	-7775.89	0.14394	0.30646	2.67652	8.48512	1	0.00358064
OG0003851	0.05278	18	-3251.63	19	-3251.57	0.05206	0.06563	4.63387	0.116502	1	0.73286
OG0003842	0.09118	18	-4162.28	19	-4162.27	0.09062	0.10005	3.2559	0.019692	1	0.888401
OG0003876	0.11872	18	-3827.81	19	-3827.81	0.1188	0.11796	2.81396	0.000356	1	0.984946
OG0003868	0.13812	18	-4903.71	19	-4903.65	0.13681	0.15506	3.43233	0.121952	1	0.726927
OG0003857	0.09831	18	-5000.47	19	-5000.28	0.0966	0.12178	3.55904	0.370854	1	0.542539
OG0003879	0.1076	18	-7434.9	19	-7434.83	0.10858	0.09785	4.32558	0.134878	1	0.713427
OG0003855	0.2443	18	-4772.29	19	-4771.73	0.23851	0.36572	3.82599	1.13529	1	0.286649
OG0003834	0.04877	18	-5864.18	19	-5863.83	0.04762	0.06722	4.62551	0.70819	1	0.400045
OG0003837	0.06919	18	-3791.87	19	-3791.83	0.06844	0.08168	3.73183	0.07016	1	0.791104
OG0003866	0.0289	18	-3209.1	19	-3207.96	0.0315	0.0001	2.42942	2.27725	1	0.131284
OG0003856	0.10798	18	-7769.83	19	-7764.38	0.10048	0.22457	3.74942	10.9129	1	0.000954989
OG0003863	0.02169	18	-4228.92	19	-4228.88	0.02202	0.01706	5.96304	0.087804	1	0.766988
OG0003784	0.02385	18	-5081.45	19	-5080.42	0.02238	0.04682	5.14011	2.06216	1	0.150996
OG0003812	0.03619	18	-5347.09	19	-5345.23	0.03455	0.14373	6.50789	3.71289	1	0.053994
OG0003878	0.15434	18	-8004.47	19	-8003.77	0.15664	0.08786	4.02588	1.38471	1	0.2393
OG0003785	0.07129	18	-5452.95	19	-5452.53	0.07248	0.0438	4.91863	0.851428	1	0.356149
OG0003756	0.17627	18	-8347.99	19	-8347.61	0.17286	0.22123	4.24323	0.755272	1	0.384812
OG0003793	0.21544	18	-8409	19	-8404.95	0.20382	0.46612	5.08403	8.09403	1	0.00444112
OG0003789	0.15622	18	-5834.92	19	-5833.42	0.1656	0.08901	4.49598	3.00446	1	0.0830357
OG0003778	0.03593	18	-6155.1	19	-6154.42	0.03703	0.01319	1.92258	1.35383	1	0.244609
OG0003864	0.03512	18	-7162.23	19	-7160.47	0.03786	0.00832	2.6	3.51644	1	0.060763
OG0003753	0.04231	18	-6993.66	19	-6993.49	0.04329	0.03186	4.6671	0.342072	1	0.558636
OG0003881	0.04583	18	-6522.58	19	-6522.29	0.04673	0.03136	4.18232	0.592212	1	0.441565
OG0003946	0.10369	18	-1498.15	19	-1497.73	0.10905	0.05467	3.55823	0.853002	1	0.355704
OG0003752	0.01829	18	-5462.06	19	-5460.98	0.01737	0.05107	3.97672	2.16698	1	0.141003
OG0003909	0.02636	18	-1892.84	19	-1892.82	0.02678	0.02201	3.30727	0.034542	1	0.852559
OG0003911	0.02741	18	-2129.49	19	-2129.14	0.029	0.0001	3.42007	0.697472	1	0.403634
OG0003954	0.34972	18	-3166.33	19	-3166.25	0.34534	0.40771	3.93798	0.162452	1	0.686909
OG0003895	0.05358	18	-3004.66	19	-3004.46	0.05509	0.03867	5.01981	0.414646	1	0.519621
OG0003896	0.36669	18	-2935.64	19	-2935.6	0.36156	0.40475	3.42713	0.068468	1	0.793581
OG0003913	0.17299	18	-3154.03	19	-3153.61	0.16898	0.27454	4.21251	0.833854	1	0.36116
OG0003961	0.01305	18	-1241.86	19	-1238.71	0.00887	0.17207	4.30757	6.28476	1	0.0121781
OG0003939	0.03444	18	-1317.45	19	-1317.35	0.03495	0.0001	3.76901	0.193624	1	0.659917
OG0003990	0.06266	18	-697.982	19	-697.56	0.05704	0.14106	5.68019	0.844214	1	0.358194
OG0003927	0.10403	18	-1552.95	19	-1552.94	0.10494	0.09398	3.24723	0.02341	1	0.878396
OG0003957	0.23622	18	-2795.27	19	-2795.07	0.23053	0.30268	2.51027	0.414236	1	0.519827
OG0003920	0.1087	18	-1281.72	19	-1281.68	0.10437	0.192	2.17815	0.092766	1	0.76069
OG0003953	0.32692	18	-2687.73	19	-2687.49	0.33449	0.20713	4.06245	0.490158	1	0.483857
OG0003900	0.13553	18	-6399.02	19	-6399	0.13611	0.1266	3.57521	0.03917	1	0.843112
OG0003937	0.13259	18	-1643.96	19	-1640.04	0.10379	0.44736	3.87799	7.84572	1	0.0050941
OG0003888	0.01169	18	-3414.23	19	-3413.29	0.01236	0.0001	5.2937	1.88918	1	0.169294
OG0003893	0.01936	18	-2797.54	19	-2795.99	0.02147	0.0001	4.53213	3.10096	1	0.0782462
OG0003897	0.19218	18	-5582.93	19	-5580.56	0.20053	0.08611	4.33647	4.74062	1	0.0294585
OG0003938	0.15778	18	-2263.74	19	-2263.73	0.15873	0.13983	3.30261	0.03108	1	0.860062
OG0003892	0.08272	18	-2226.1	19	-2226.08	0.08199	0.08893	3.40058	0.029112	1	0.864521
OG0003887	0.05783	18	-3286.6	19	-3286.41	0.05918	0.04055	3.78585	0.369634	1	0.543204
OG0003968	0.1373	18	-3429.55	19	-3429.52	0.13835	0.12542	5.17731	0.057916	1	0.809821
OG0003944	0.12008	18	-2449.96	19	-2448.53	0.12738	0.03947	5.3684	2.85088	1	0.0913242
OG0003989	0.1233	18	-2950.93	19	-2950.13	0.12996	0.05767	3.15816	1.60432	1	0.205292
OG0003952	0.13912	18	-4575.27	19	-4574.86	0.14169	0.09456	3.19874	0.83255	1	0.361536
OG0003991	0.03431	18	-2951.88	19	-2948.83	0.0366	0.0001	5.57842	6.09428	1	0.013562
OG0003956	0.21935	18	-3267.21	19	-3266.89	0.22368	0.13839	3.58477	0.642052	1	0.422969
OG0003926	0.23022	18	-3503.04	19	-3502.79	0.22381	0.30487	2.85562	0.492752	1	0.482702
OG0003932	0.13114	18	-2017.5	19	-2017.07	0.13525	0.06498	3.60792	0.85589	1	0.354891
OG0003967	0.05382	18	-3363.51	19	-3362.23	0.05492	0.0001	2.03548	2.55908	1	0.109662
OG0003947	0.06525	18	-3361.49	19	-3361.38	0.06398	0.07935	4.13257	0.224726	1	0.635462
OG0003889	0.08727	18	-3145.86	19	-3145.37	0.08985	0.04907	4.07968	0.97645	1	0.323077
OG0003935	0.07688	18	-2635.52	19	-2635.27	0.07411	0.1094	2.34974	0.511968	1	0.474288
OG0003903	0.07087	18	-4263.12	19	-4260.99	0.06491	0.14474	4.34885	4.27316	1	0.0387188
OG0003960	0.00103	18	-1708.79	19	-1708.75	0.00108	0.0001	5.82211	0.081248	1	0.775613
OG0003904	0.03403	18	-3466.04	19	-3463.61	0.03788	0.0001	2.50336	4.85369	1	0.027587
OG0003992	0.2452	18	-3505.84	19	-3505.25	0.23671	0.3641	3.06849	1.1895	1	0.27543
OG0003945	0.03435	18	-4809.9	19	-4809.89	0.0345	0.03189	3.57324	0.019902	1	0.887811
OG0003901	0.03637	18	-3808.82	19	-3807.91	0.03814	0.01515	6.40535	1.80039	1	0.179665
OG0003925	0.08756	18	-4093.33	19	-4093.33	0.0874	0.08922	3.35696	0.004076	1	0.949095
OG0003955	0.03052	18	-3090.29	19	-3090.09	0.02959	0.04989	6.20472	0.395568	1	0.529387
OG0003948	0.0759	18	-3703.41	19	-3698.42	0.08115	0.0001	3.22686	9.97571	1	0.00158619
OG0003964	0.25885	18	-5416	19	-5415.41	0.26447	0.1699	2.86736	1.19523	1	0.274277
OG0003951	0.07003	18	-4953.37	19	-4953.28	0.07126	0.06083	2.78593	0.170816	1	0.679388
OG0003891	0.09792	18	-5977.79	19	-5976.5	0.10153	0.05278	4.37362	2.58311	1	0.10801
OG0003985	0.0965	18	-3400.44	19	-3400.2	0.09386	0.12406	4.14819	0.492564	1	0.482786
OG0003971	0.22778	18	-6136.04	19	-6136.03	0.22707	0.23779	3.80583	0.022556	1	0.880617
OG0004005	0.02016	18	-3319.96	19	-3318.36	0.02127	0.0001	5.18935	3.18514	1	0.0743105
OG0003970	0.18147	18	-5714.59	19	-5714.34	0.18492	0.14387	3.37156	0.508344	1	0.475857
OG0003965	0.06402	18	-3596.05	19	-3595.63	0.06531	0.02756	2.73709	0.821812	1	0.364651
OG0003918	0.04296	18	-5096.93	19	-5094.91	0.03992	0.09113	4.18456	4.05358	1	0.0440777
OG0003922	0.15067	18	-5861.24	19	-5861.21	0.15158	0.13832	5.75842	0.063634	1	0.800842
OG0003928	0.08909	18	-4487.38	19	-4487.37	0.08931	0.08446	5.97889	0.008932	1	0.924705
OG0003983	0.05953	18	-3719.49	19	-3719.36	0.06051	0.04376	6.88848	0.26744	1	0.605054
OG0003984	0.07851	18	-4346.35	19	-4345.42	0.08155	0.03264	4.9304	1.86538	1	0.172006
OG0003934	0.2329	18	-5850.41	19	-5850.31	0.23013	0.26296	4.30716	0.20079	1	0.654084
OG0003915	0.07258	18	-3830.13	19	-3827.8	0.07677	0.01393	4.14832	4.65358	1	0.0309889
OG0003988	0.01876	18	-3620.52	19	-3620.35	0.01932	0.01104	3.72483	0.329036	1	0.566227
OG0003919	0.03951	18	-2304.67	19	-2303.28	0.03467	0.11167	3.8516	2.77748	1	0.0955985
OG0003917	0.08409	18	-4828.41	19	-4827.6	0.08703	0.0464	2.81645	1.62497	1	0.2024
OG0003969	0.13357	18	-6280.75	19	-6280.68	0.13458	0.1176	5.27084	0.140024	1	0.708257
OG0003921	0.20277	18	-7172.24	19	-7172.05	0.20538	0.17116	4.18762	0.384486	1	0.535212
OG0004004	0.15355	18	-3453.01	19	-3450.82	0.16386	0.06073	5.14907	4.38896	1	0.0361723
OG0003912	0.18647	18	-6786.69	19	-6776.21	0.15941	0.46798	4.41538	20.9674	1	4.672e-06
OG0003942	0.22698	18	-5834.27	19	-5831.93	0.23362	0.05754	3.06095	4.67731	1	0.0305636
OG0003941	0.1051	18	-4976.99	19	-4976.48	0.1024	0.14903	4.91992	1.01712	1	0.313204
OG0004002	0.03823	18	-7054.9	19	-7052.9	0.03537	0.07481	3.24174	3.99381	1	0.0456677
OG0003998	0.08454	18	-5470.65	19	-5469.47	0.08842	0.03153	4.70828	2.37563	1	0.123242
OG0003981	0.03679	18	-4929.76	19	-4929.66	0.03585	0.04848	4.53562	0.196962	1	0.657184
OG0004001	0.11749	18	-5755.32	19	-5753.13	0.1125	0.27519	2.90295	4.38055	1	0.0363512
OG0003979	0.10451	18	-5904.32	19	-5904.26	0.1035	0.11697	4.63636	0.12376	1	0.724992
OG0003966	0.3852	18	-10926.8	19	-10925.6	0.37548	0.55151	4.64472	2.54216	1	0.110843
OG0003963	0.02128	18	-3768.97	19	-3767.45	0.02396	0.0001	3.22346	3.02426	1	0.0820279
OG0003884	0.02318	18	-6374.17	19	-6373.4	0.02399	0.00814	6.81922	1.52882	1	0.21629
OG0003936	0.18115	18	-8292.57	19	-8291.74	0.17668	0.24559	3.81311	1.65103	1	0.198819
OG0003914	0.06738	18	-7138.84	19	-7136.63	0.07027	0.02787	2.80232	4.43412	1	0.0352273
OG0003890	0.08603	18	-7420.59	19	-7419.46	0.08856	0.04475	4.12209	2.25794	1	0.13293
OG0003910	0.17241	18	-7820.2	19	-7820.15	0.17357	0.15727	4.15628	0.097348	1	0.755036
OG0003923	0.09517	18	-6591.68	19	-6591.68	0.09516	0.09544	2.52827	5.2e-05	1	0.994246
OG0003993	0.10139	18	-5811.55	19	-5809.49	0.10651	0.02907	5.90852	4.12248	1	0.042317
OG0003962	0.13203	18	-5822.68	19	-5822.68	0.13222	0.12611	3.5871	0.009404	1	0.922747
OG0004011	0.14571	18	-2891.25	19	-2890.25	0.15267	0.0744	3.06929	2.0107	1	0.156193
OG0004006	0.02195	18	-1613.62	19	-1613.03	0.0229	0.0001	3.88303	1.17602	1	0.278168
OG0004008	0.05803	18	-1782.1	19	-1781.94	0.0563	0.08358	4.37967	0.305746	1	0.580302
OG0004053	0.32038	18	-3788.76	19	-3788.33	0.31061	0.43311	3.90212	0.859508	1	0.353876
OG0004051	0.06568	18	-2821.46	19	-2821.45	0.06528	0.07226	5.46394	0.021912	1	0.882321
OG0004022	0.09625	18	-2001.17	19	-2000.97	0.09415	0.15358	5.17749	0.392876	1	0.530792
OG0004031	1.11184	18	-2539.59	19	-2371.28	0.06771	0.03008	5.47364	336.616	1	0
OG0004019	0.14698	18	-2346.75	19	-2345.92	0.15609	0.04565	5.04796	1.64243	1	0.199992
OG0004026	0.02765	18	-1232.08	19	-1231.34	0.02992	0.0001	6.80411	1.46422	1	0.22626
OG0004016	0.10976	18	-1840.95	19	-1840.24	0.10491	0.26776	2.26862	1.41979	1	0.233439
OG0004010	0.11009	18	-2704.73	19	-2704.71	0.11151	0.10088	3.53894	0.047804	1	0.82693
OG0004034	0.02757	18	-2752.75	19	-2750.83	0.03054	0.0001	2.7396	3.82752	1	0.0504175
OG0004052	0.0297	18	-3541.28	19	-3541.18	0.03019	0.01943	4.8368	0.199828	1	0.65486
OG0004039	0.02603	18	-4451.16	19	-4451.13	0.02629	0.01994	5.86075	0.072768	1	0.787348
OG0004047	0.10398	18	-5105.07	19	-5104.91	0.10575	0.08446	3.95961	0.31652	1	0.573707
OG0004042	0.0818	18	-3069.13	19	-3068.66	0.07939	0.12396	3.40145	0.937702	1	0.33287
OG0004018	0.09488	18	-3646.93	19	-3646.33	0.09873	0.06019	3.16015	1.18408	1	0.276528
OG0004012	0.07991	18	-5120.34	19	-5118.9	0.08336	0.03231	5.25192	2.88145	1	0.0896051
OG0004048	0.00298	18	-2443.41	19	-2443.31	0.00329	0.0001	3.98056	0.192074	1	0.661196
OG0004007	0.04503	18	-3899	19	-3898.89	0.04553	0.02813	5.58774	0.23172	1	0.630251
OG0004021	0.0203	18	-2199.54	19	-2199.17	0.0186	0.05496	3.04861	0.733672	1	0.391696
OG0004017	0.20875	18	-6843.61	19	-6843.6	0.20916	0.20197	4.53834	0.011	1	0.91647
OG0004015	0.24632	18	-4678.4	19	-4675.44	0.26081	0.09223	4.91599	5.915	1	0.0150125
OG0004032	0.08298	18	-6246.62	19	-6246.28	0.08474	0.06285	3.59514	0.68856	1	0.406655
OG0004055	0.0368	18	-4713.54	19	-4712.34	0.03422	0.09513	7.10384	2.39517	1	0.121711
OG0004027	0.024	18	-4293.14	19	-4285.34	0.01658	0.09289	2.7483	15.6097	1	7.7855e-05
OG0004040	0.04808	18	-5743.96	19	-5743.16	0.05006	0.02458	4.02777	1.58641	1	0.207839
OG0004033	0.05333	18	-2693.61	19	-2692.8	0.04995	0.10633	4.42884	1.61226	1	0.204174
OG0004013	0.10665	18	-6604.52	19	-6603.87	0.10875	0.06915	4.37208	1.30924	1	0.252532
OG0004020	0.05538	18	-6083.28	19	-6083.06	0.05652	0.03775	2.95797	0.449812	1	0.502424
OG0004035	0.06439	18	-7661.96	19	-7661.57	0.06575	0.0442	2.30865	0.776702	1	0.378152
OG0004045	0.05728	18	-7278.76	19	-7273.55	0.06293	0.00655	3.36911	10.4227	1	0.00124473
OG0004057	0.05465	18	-2633.25	19	-2633.18	0.05548	0.04124	5.26107	0.140698	1	0.707588
OG0004120	0.04139	18	-2077.4	19	-2077.38	0.04096	0.04802	4.02912	0.038178	1	0.845086
OG0004066	0.03667	18	-2160.69	19	-2159.24	0.03202	0.11771	1.43015	2.91134	1	0.0879589
OG0004161	0.12975	18	-2709.63	19	-2709.4	0.12652	0.1707	4.08706	0.473898	1	0.491199
OG0004132	0.05243	18	-2545.49	19	-2545.47	0.05207	0.0588	3.75464	0.032578	1	0.856765
OG0004150	0.11576	18	-2944.79	19	-2944.04	0.11973	0.05953	2.75579	1.50565	1	0.219803
OG0004159	0.10642	18	-3877.38	19	-3877.33	0.10521	0.1176	3.73142	0.108372	1	0.742005
OG0004060	0.16072	18	-2116.04	19	-2116.04	0.16096	0.15675	2.84693	0.001298	1	0.97126
OG0004151	0.14586	18	-2633.98	19	-2633.58	0.14158	0.22066	3.83518	0.803166	1	0.370148
OG0004125	0.03372	18	-2380.61	19	-2380.36	0.03243	0.05335	7.80826	0.503488	1	0.477972
OG0004141	0.13318	18	-3216.46	19	-3216.28	0.13594	0.10531	4.90855	0.356382	1	0.550522
OG0004138	0.25019	18	-4592.17	19	-4588.26	0.23315	0.59451	3.07339	7.82605	1	0.00514985
OG0004226	0.08645	18	-1290.99	19	-1290.87	0.08359	0.13625	4.44924	0.25171	1	0.615874
OG0004177	0.45133	18	-2349.86	19	-2349.25	0.46617	0.2361	2.72423	1.2311	1	0.267194
OG0004204	0.36601	18	-1511.09	19	-1511.05	0.37202	0.3116	4.98282	0.095676	1	0.757082
OG0004245	0.10439	18	-722.659	19	-722.528	0.09967	0.16218	4.03224	0.26268	1	0.608285
OG0004116	0.05339	18	-2318.99	19	-2318.99	0.05359	0.04879	3.47955	0.01395	1	0.90598
OG0004119	0.20429	18	-2482.36	19	-2481.05	0.19084	0.40237	3.0152	2.61862	1	0.105616
OG0004206	0.2601	18	-2592.43	19	-2592.34	0.25624	0.31114	4.24726	0.177314	1	0.673692
OG0004129	0.09486	18	-2847.81	19	-2847.32	0.10033	0.05476	5.00229	0.987572	1	0.320337
OG0004171	0.12604	18	-2910.65	19	-2909.88	0.12195	0.24808	5.00363	1.53671	1	0.215108
OG0004186	0.31103	18	-1861.41	19	-1861.14	0.3013	0.48033	4.67134	0.531342	1	0.466043
OG0004067	0.03078	18	-4178.9	19	-4178.86	0.03038	0.0369	4.26953	0.083798	1	0.772215
OG0004201	0.11485	18	-1486.65	19	-1486.64	0.11574	0.10739	3.70437	0.014876	1	0.902925
OG0004065	0.17921	18	-3242.06	19	-3242.2	0.17441	0.18755	5.26351	-0.277514	1	invalid
OG0004183	0.12836	18	-1575.02	19	-1574.2	0.13696	0.04013	2.93791	1.64189	1	0.200066
OG0004152	0.03086	18	-2858.56	19	-2858.2	0.02935	0.05359	4.00706	0.722382	1	0.395364
OG0004251	0.18357	18	-2263.91	19	-2259.74	0.1939	0.0001	4.02807	8.34447	1	0.00386863
OG0004192	0.14565	18	-2296.67	19	-2293.46	0.16145	0.04391	3.79108	6.42789	1	0.0112342
OG0004112	0.27129	18	-3390.16	19	-3390.13	0.26985	0.31558	3.12325	0.060034	1	0.806442
OG0004145	0.20536	18	-5606.64	19	-5605.38	0.19882	0.32859	2.28366	2.51386	1	0.11285
OG0004089	0.58915	18	-1631.14	19	-1631.12	0.58478	0.69819	3.25008	0.042702	1	0.836287
OG0004136	0.03548	18	-4349.33	19	-4349.11	0.03621	0.01848	1.9585	0.442038	1	0.50614
OG0004235	0.12334	18	-2478.32	19	-2477.35	0.12914	0.04702	6.25546	1.94494	1	0.163133
OG0004196	0.01932	18	-1876.39	19	-1876.39	0.01923	0.02009	8.253	0.001572	1	0.968373
OG0004203	0.41865	18	-2014.76	19	-2010.47	0.46421	0.08104	2.59299	8.59522	1	0.00337046
OG0004191	0.0267	18	-3048.28	19	-3048.22	0.02714	0.01929	4.91622	0.112556	1	0.737253
OG0004165	0.05977	18	-6062.35	19	-6062.3	0.06017	0.04873	3.48275	0.11234	1	0.737496
OG0004176	0.12037	18	-3934.93	19	-3934.83	0.12173	0.09501	5.146	0.214344	1	0.643384
OG0004271	0.10273	18	-2195.15	19	-2194.91	0.09965	0.14212	5.29974	0.475068	1	0.490665
OG0004154	0.02667	18	-2769.73	19	-2769.72	0.02645	0.03107	2.56201	0.021508	1	0.883404
OG0004214	0.07371	18	-1531.35	19	-1528.21	0.0625	0.31021	2.6777	6.27686	1	0.0122325
OG0004248	0.17939	18	-1471.54	19	-1470.25	0.16681	0.43658	3.17414	2.57522	1	0.108549
OG0004085	0.14824	18	-2115.64	19	-2115.53	0.14579	0.20039	4.0616	0.21696	1	0.641366
OG0004142	0.03614	18	-3610.76	19	-3610.73	0.0356	0.04176	1.89682	0.071562	1	0.789076
OG0004225	0.39946	18	-6185.27	19	-6185.24	0.39757	0.42702	2.56499	0.056324	1	0.812403
OG0004260	0.01709	18	-2833.41	19	-2831.91	0.01868	0.0001	3.88619	3.01227	1	0.0826366
OG0004095	0.15001	18	-1370.79	19	-1370.13	0.15616	0.06544	2.53477	1.323	1	0.250054
OG0004086	0.04699	18	-1321.43	19	-1321.35	0.0456	0.06379	2.24142	0.150678	1	0.697888
OG0004243	0.06857	18	-1653.93	19	-1652.73	0.07276	0.0001	2.78521	2.3889	1	0.122199
OG0004233	0.11849	18	-3475.35	19	-3475.16	0.12066	0.08785	3.80868	0.38879	1	0.532936
OG0004184	0.01314	18	-2783.23	19	-2782.37	0.01128	0.0383	4.46766	1.73115	1	0.188265
OG0004264	0.10573	18	-2057.22	19	-2057.21	0.10741	0.08092	6.58412	0.02102	1	0.884724
OG0004103	0.29841	18	-2975.35	19	-2975	0.28864	0.39604	4.0184	0.709364	1	0.399655
OG0004122	0.1202	18	-5387.45	19	-5386.27	0.11478	0.18526	3.11447	2.36823	1	0.123827
OG0004172	0.04	18	-2899.95	19	-2899.44	0.04145	0.01629	5.77321	1.01684	1	0.313269
OG0004126	0.02659	18	-3252.12	19	-3251.76	0.02734	0.01243	4.1335	0.710044	1	0.399429
OG0004149	0.0342	18	-3326.32	19	-3324.91	0.03164	0.07974	3.0973	2.82916	1	0.0925669
OG0004115	0.01507	18	-1303.09	19	-1302.93	0.01398	0.03002	4.08889	0.316142	1	0.573935
OG0004182	0.36899	18	-6759.69	19	-6753.39	0.34334	1.07644	2.78577	12.6042	1	0.000384888
OG0004205	0.127	18	-2755.17	19	-2755.16	0.12751	0.11708	5.96015	0.020512	1	0.886116
OG0004162	0.13043	18	-5608.2	19	-5607.21	0.13332	0.0642	3.31134	1.9792	1	0.159475
OG0004178	0.01538	18	-2723.5	19	-2722.81	0.01667	0.0001	6.28012	1.38448	1	0.23934
OG0004231	0.05234	18	-3167.89	19	-3163.16	0.05811	0.0001	4.25071	9.46091	1	0.00209897
OG0004123	0.01663	18	-4885.96	19	-4884.28	0.01759	0.0001	4.35922	3.36339	1	0.0666606
OG0004164	0.03303	18	-6769.07	19	-6767.76	0.03127	0.07769	2.84205	2.62161	1	0.105418
OG0004059	0.0835	18	-4698.7	19	-4698.37	0.08537	0.06113	3.80842	0.650124	1	0.420068
OG0004188	0.03935	18	-3744.65	19	-3742.19	0.03471	0.10069	5.38799	4.90547	1	0.0267718
OG0004101	0.07314	18	-1916.75	19	-1916.51	0.07605	0.0494	3.29879	0.469984	1	0.492995
OG0004063	0.12641	18	-5653.44	19	-5648.22	0.13485	0.02535	3.44052	10.4287	1	0.00124071
OG0004100	0.11207	18	-3607.31	19	-3605.86	0.11624	0.03788	3.47664	2.90572	1	0.0882658
OG0004114	0.06556	18	-3917.23	19	-3916.71	0.06793	0.03684	6.144	1.03101	1	0.309922
OG0004092	0.30873	18	-1978.07	19	-1977.18	0.32282	0.12013	3.51068	1.78034	1	0.182107
OG0004229	0.0763	18	-2806.96	19	-2806.25	0.07927	0.02719	3.53187	1.40414	1	0.236032
OG0004084	0.0267	18	-1985.81	19	-1984.58	0.02301	0.06977	2.10655	2.46158	1	0.116662
OG0004284	0.12904	18	-3039.42	19	-3037.67	0.12016	0.3158	5.28134	3.51399	1	0.0608527
OG0004238	0.07149	18	-2676.24	19	-2675.44	0.06703	0.13949	3.9919	1.61585	1	0.203671
OG0004135	0.13142	18	-3578.72	19	-3577.97	0.12665	0.21413	3.43537	1.49966	1	0.220724
OG0004244	0.01814	18	-1695.65	19	-1695.33	0.01868	0.0001	5.23494	0.63765	1	0.424563
OG0004266	0.06333	18	-3462.39	19	-3462.37	0.06374	0.05472	5.06373	0.04437	1	0.833167
OG0004222	0.36049	18	-5941.33	19	-5940.75	0.35306	0.51127	3.72721	1.14696	1	0.284186
OG0004175	0.1639	18	-5042.88	19	-5041.98	0.15945	0.27602	2.66899	1.79839	1	0.179907
OG0004254	0.11727	18	-2144.48	19	-2144.38	0.11915	0.08834	3.22227	0.188338	1	0.664304
OG0004127	0.09993	18	-4686.8	19	-4682.99	0.1059	0.01959	3.86984	7.62029	1	0.00577151
OG0004212	0.13601	18	-4666.39	19	-4663.48	0.127	0.31343	4.94832	5.81838	1	0.0158596
OG0004093	0.10867	18	-2501.44	19	-2501.28	0.10708	0.15336	4.32828	0.310012	1	0.577673
OG0004097	0.52884	18	-2492.83	19	-2491.72	0.49598	1.00533	3.72347	2.21423	1	0.136743
OG0004113	0.04639	18	-2144.45	19	-2143.52	0.04786	0.0001	4.92652	1.84728	1	0.1741
OG0004211	0.03817	18	-3301.01	19	-3301.01	0.03836	0.03424	3.39515	0.011544	1	0.914438
OG0004117	0.09896	18	-4877.3	19	-4875.94	0.10412	0.05329	3.036	2.72116	1	0.0990258
OG0004241	0.01357	18	-2210.25	19	-2209.6	0.01452	0.0001	3.05597	1.30455	1	0.253384
OG0004070	0.10789	18	-3255.12	19	-3254.85	0.10448	0.15022	3.01996	0.527514	1	0.467654
OG0004073	0.15031	18	-4016.81	19	-4016.78	0.14901	0.16381	4.25678	0.067854	1	0.794487
OG0004133	0.21246	18	-7677.16	19	-7675.97	0.2064	0.31134	3.6603	2.37401	1	0.12337
OG0004221	0.10128	18	-2888.99	19	-2888.55	0.10318	0.0001	5.24049	0.878344	1	0.348656
OG0004111	0.10625	18	-3647.75	19	-3647.75	0.10641	0.10272	4.36769	0.003716	1	0.951392
OG0004068	0.16385	18	-4106.2	19	-4103.03	0.15317	0.41043	5.02523	6.34879	1	0.0117462
OG0004195	0.24977	18	-9897.7	19	-9897.67	0.24878	0.2644	3.41861	0.061744	1	0.80376
OG0004189	0.01857	18	-5467.55	19	-5467.55	0.01861	0.01819	3.59802	0.001112	1	0.973398
OG0004208	0.13985	18	-4746.74	19	-4742.58	0.15133	0.04006	2.6295	8.32073	1	0.00391952
OG0004239	0.01573	18	-4973.68	19	-4973.65	0.01556	0.01902	6.43475	0.06544	1	0.798096
OG0004250	0.01389	18	-3654.47	19	-3653.91	0.01439	0.0001	4.30307	1.13462	1	0.286792
OG0004058	0.10195	18	-6957.85	19	-6956.57	0.10504	0.04838	5.52112	2.55405	1	0.110012
OG0004074	0.17758	18	-6139.86	19	-6139.65	0.1798	0.1458	3.89325	0.418698	1	0.517587
OG0004288	0.01586	18	-4535.48	19	-4533.72	0.01665	0.0001	3.51508	3.507	1	0.0611099
OG0004144	0.0881	18	-6649.8	19	-6649.23	0.09014	0.0575	5.27399	1.15355	1	0.282807
OG0004056	0.06056	18	-4419.62	19	-4419.15	0.06285	0.03334	3.06795	0.957454	1	0.327829
OG0004157	0.18334	18	-6084.28	19	-6082.43	0.17541	0.40438	4.13975	3.70089	1	0.0543835
OG0004278	0.29006	18	-5139.22	19	-5125.23	0.24024	1.01493	4.95393	27.9836	1	1.22e-07
OG0004118	0.01874	18	-3364.78	19	-3364.02	0.01995	0.0001	6.06813	1.53477	1	0.215399
OG0004106	0.0466	18	-5239.47	19	-5239.19	0.04768	0.02983	2.73281	0.569876	1	0.450308
OG0004215	0.06844	18	-4299.6	19	-4299.56	0.06908	0.06249	4.79282	0.061926	1	0.803477
OG0004094	0.18481	18	-4902.32	19	-4900.14	0.19097	0.05314	3.54366	4.36759	1	0.0366288
OG0004242	0.04694	18	-4149.91	19	-4148.78	0.04954	0.0186	2.55559	2.27227	1	0.131707
OG0004077	0.10669	18	-3322.42	19	-3322.33	0.10792	0.08168	4.14565	0.18949	1	0.663341
OG0004267	0.19485	18	-4175.27	19	-4174.84	0.19043	0.28252	4.39566	0.852012	1	0.355984
OG0004082	0.04581	18	-4716.74	19	-4715.44	0.04803	0.01714	2.41225	2.593	1	0.107337
OG0004202	0.01537	18	-5837.91	19	-5837.9	0.01543	0.01399	3.43494	0.008922	1	0.924747
OG0004207	0.03068	18	-5318.89	19	-5318.14	0.02902	0.05392	4.36644	1.50689	1	0.219615
OG0004153	0.05137	18	-7000.99	19	-7000.99	0.05132	0.05229	5.19774	0.001794	1	0.966215
OG0004083	0.43904	18	-6482.75	19	-6479.78	0.41613	0.80463	3.33641	5.92272	1	0.0149469
OG0004249	0.06108	18	-5513.55	19	-5513.07	0.05913	0.09421	3.17774	0.944796	1	0.331047
OG0004096	0.05097	18	-4880.22	19	-4880.13	0.05157	0.04049	3.32181	0.192854	1	0.660552
OG0004121	0.2625	18	-5650.25	19	-5650.22	0.26427	0.24565	4.02231	0.069002	1	0.792795
OG0004076	0.15906	18	-5805.77	19	-5805.76	0.15879	0.16294	2.75582	0.00581	1	0.939241
OG0004261	0.03226	18	-6690.34	19	-6690.31	0.03199	0.03651	4.28807	0.068784	1	0.793116
OG0004213	0.1203	18	-5547.81	19	-5547.13	0.12248	0.05421	2.75854	1.35771	1	0.243935
OG0004240	0.03686	18	-4471.95	19	-4469.11	0.03899	0.0001	8.26208	5.66735	1	0.0172835
OG0004258	0.16594	18	-4514.79	19	-4514.62	0.16396	0.2193	2.60696	0.35061	1	0.553768
OG0004167	0.06274	18	-6790.43	19	-6790.09	0.06117	0.07853	1.82634	0.680674	1	0.409355
OG0004274	0.0898	18	-5313.55	19	-5309.94	0.08311	0.25957	2.43878	7.23003	1	0.00716942
OG0004282	0.07388	18	-6358.99	19	-6358.99	0.07368	0.07628	6.06459	0.00945	1	0.922559
OG0004286	0.05792	18	-5815.68	19	-5814.46	0.0602	0.02518	3.85176	2.43171	1	0.118903
OG0004180	0.38537	18	-7714.83	19	-7714.83	0.38538	0.38527	4.92401	2e-06	1	0.998872
OG0004246	0.03109	18	-2966.03	19	-2965.87	0.03189	0.0001	3.07521	0.32248	1	0.570121
OG0004257	0.04316	18	-4876.54	19	-4876.51	0.04249	0.04735	3.23925	0.05023	1	0.822664
OG0004107	0.13579	18	-8889.95	19	-8888.84	0.13176	0.19081	3.63667	2.21539	1	0.13664
OG0004279	0.08814	18	-5162.34	19	-5162.19	0.08964	0.07099	3.42688	0.312388	1	0.576218
OG0004156	0.15921	18	-6586.84	19	-6585.34	0.15278	0.23648	3.40742	3.00893	1	0.082807
OG0004270	0.04831	18	-4002.65	19	-4002.57	0.04754	0.05959	5.73559	0.173072	1	0.677396
OG0004069	0.07919	18	-6040.18	19	-6039.88	0.07769	0.1075	3.98525	0.60115	1	0.43814
OG0004230	0.17323	18	-6845.75	19	-6845.37	0.1699	0.22226	5.21401	0.766612	1	0.381267
OG0004200	0.02704	18	-4469.19	19	-4468.22	0.02868	0.00716	2.62142	1.93638	1	0.164062
OG0004275	0.07176	18	-6032.18	19	-6032.1	0.07276	0.06216	6.14375	0.164044	1	0.68546
OG0004285	0.12551	18	-6297.23	19	-6297.04	0.12719	0.10452	3.81226	0.392086	1	0.531205
OG0004071	0.06896	18	-7190.69	19	-7190.05	0.07085	0.04244	2.68732	1.29678	1	0.254803
OG0004209	0.0539	18	-6522.76	19	-6522.64	0.05294	0.06623	4.63386	0.24506	1	0.620575
OG0004234	0.14521	18	-7042.14	19	-7041.89	0.14727	0.11287	4.03204	0.506754	1	0.476547
OG0004105	0.12606	18	-6178.03	19	-6174.76	0.11459	0.26793	3.20704	6.55039	1	0.0104861
OG0004217	0.0396	18	-7012.87	19	-7012.8	0.04003	0.03459	3.54327	0.134126	1	0.714192
OG0004223	0.05727	18	-6323.38	19	-6319.85	0.05083	0.13188	4.84573	7.05461	1	0.00790613
OG0004220	0.1885	18	-7333.09	19	-7332.19	0.18263	0.28557	3.71457	1.80823	1	0.178721
OG0004269	0.07059	18	-6397.28	19	-6397.17	0.06977	0.08466	4.13593	0.226172	1	0.634377
OG0004281	0.06242	18	-6295.82	19	-6294.49	0.06463	0.02866	4.35682	2.6538	1	0.103302
OG0004263	0.05667	18	-5562.42	19	-5559.77	0.06064	0.0001	6.24439	5.30665	1	0.0212442
OG0004227	0.03151	18	-5999.38	19	-5998.94	0.02835	0.06024	2.76881	0.890288	1	0.345399
OG0004155	0.10001	18	-6122.97	19	-6122.9	0.09863	0.11216	4.16683	0.144138	1	0.704201
OG0004295	0.18025	18	-1391.7	19	-1391.68	0.18185	0.1652	5.02787	0.027772	1	0.867646
OG0004320	0.01317	18	-2186.45	19	-2186.44	0.01337	0.01151	7.97515	0.019618	1	0.888609
OG0004300	0.22284	18	-1412.21	19	-1412.09	0.2279	0.15962	4.05833	0.244586	1	0.620913
OG0004328	0.17035	18	-1597.62	19	-1597.61	0.17159	0.1579	3.72824	0.020026	1	0.887464
OG0004310	0.15174	18	-2914.67	19	-2914.15	0.14744	0.25273	4.6946	1.02886	1	0.310426
OG0004337	0.19863	18	-1543.57	19	-1543.56	0.19725	0.21298	4.4222	0.019184	1	0.88984
OG0004318	0.00665	18	-2424.35	19	-2424.21	0.00698	0.0001	5.21805	0.27936	1	0.597121
OG0004315	0.11487	18	-2554.99	19	-2554.97	0.11392	0.13038	3.05117	0.051122	1	0.821122
OG0004298	0.25371	18	-4436.88	19	-4436.27	0.24512	0.33412	3.45322	1.20928	1	0.271476
OG0004322	0.06524	18	-1865.69	19	-1865.45	0.06765	0.03928	3.63868	0.487768	1	0.484925
OG0004306	0.03443	18	-1579.87	19	-1579.56	0.03944	0.0001	5.70528	0.617732	1	0.431891
OG0004312	0.10945	18	-3942.18	19	-3941.73	0.11147	0.05572	3.82676	0.895134	1	0.34409
OG0004296	0.17216	18	-4899.9	19	-4898.26	0.17913	0.0882	4.14008	3.27723	1	0.0702472
OG0004317	0.03005	18	-3632.15	19	-3632.11	0.03048	0.02496	5.44438	0.07073	1	0.790277
OG0004321	0.12803	18	-2609.15	19	-2608.5	0.11928	0.22055	3.2477	1.29002	1	0.256044
OG0004341	0.23341	18	-2257.33	19	-2257.18	0.22623	0.28161	2.41624	0.299026	1	0.584494
OG0004314	0.19486	18	-5373.05	19	-5372.62	0.19822	0.13725	4.33232	0.860236	1	0.353673
OG0004294	0.07532	18	-4703.86	19	-4703.21	0.0725	0.15776	3.69732	1.3003	1	0.254158
OG0004308	0.0204	18	-1792.31	19	-1791.89	0.02111	0.0001	3.67597	0.829868	1	0.362311
OG0004330	0.01332	18	-4854.67	19	-4854.51	0.01365	0.00801	5.52974	0.308376	1	0.578678
OG0004331	0.21864	18	-1859.24	19	-1858.99	0.20831	0.35556	3.94332	0.507526	1	0.476212
OG0004325	0.24445	18	-5709.84	19	-5709.14	0.25114	0.16768	3.91638	1.41345	1	0.234485
OG0004303	0.07581	18	-4636.14	19	-4635.41	0.07374	0.13249	5.1069	1.45347	1	0.227972
OG0004335	0.06241	18	-3628.11	19	-3627.31	0.06004	0.11122	3.5136	1.59373	1	0.206794
OG0004334	0.03357	18	-3244.32	19	-3244.3	0.03393	0.02935	6.45592	0.035652	1	0.850236
OG0004305	0.10524	18	-4591.83	19	-4589.06	0.09703	0.20163	4.83554	5.54159	1	0.0185697
OG0004338	0.12685	18	-5192.92	19	-5192.72	0.12904	0.10125	5.76776	0.384868	1	0.535009
OG0004348	0.13147	18	-4656.77	19	-4656.72	0.1304	0.14802	4.11497	0.103064	1	0.748183
OG0004291	0.01404	18	-3402.01	19	-3401.75	0.01467	0.0001	4.33328	0.516858	1	0.472185
OG0004304	0.09435	18	-5282.35	19	-5282.28	0.09497	0.07475	3.34563	0.139628	1	0.708651
OG0004340	0.13764	18	-5555.93	19	-5555.92	0.1381	0.12941	4.53544	0.02604	1	0.871803
OG0004307	0.05114	18	-6882.04	19	-6881.27	0.04965	0.07872	4.92561	1.53606	1	0.215206
OG0004327	0.16062	18	-7023.96	19	-7023.03	0.15585	0.23215	5.43788	1.86036	1	0.172583
OG0004297	0.50278	18	-8807.92	19	-8807.61	0.49419	0.61525	4.32217	0.602972	1	0.437446
OG0004324	0.17779	18	-8869.78	19	-8868.84	0.18161	0.12188	3.41372	1.88267	1	0.170031
OG0004339	0.10178	18	-5110.28	19	-5109.83	0.10448	0.05378	4.80842	0.897506	1	0.343451
OG0004346	0.12373	18	-6950.04	19	-6949.79	0.12201	0.15798	3.51563	0.505294	1	0.477183
OG0004302	0.09788	18	-7503.27	19	-7502.96	0.09926	0.07227	3.98011	0.636376	1	0.425026
OG0004347	0.19736	18	-5520.04	19	-5519.7	0.20506	0.12295	4.68514	0.69085	1	0.405875
OG0004309	0.07177	18	-5891.3	19	-5891.27	0.0712	0.0781	8.17785	0.046964	1	0.828433
OG0004351	0.18435	18	-2895.47	19	-2895.17	0.18806	0.12311	2.60131	0.588398	1	0.443039
OG0004350	0.08827	18	-7947.31	19	-7940.07	0.08148	0.2286	2.7013	14.4701	1	0.000142401
OG0004354	0.09461	18	-2798.82	19	-2798.48	0.09212	0.14399	4.23633	0.685722	1	0.407623
OG0004358	0.03479	18	-1249.22	19	-1247.77	0.03856	0.0001	5.29375	2.88808	1	0.0892374
OG0004421	0.16053	18	-1475.8	19	-1471.17	0.12235	0.67506	3.24333	9.26484	1	0.00233595
OG0004468	0.12459	18	-992.875	19	-992.834	0.1272	0.0913	3.71445	0.082504	1	0.773932
OG0004451	0.04138	18	-1803.57	19	-1803.54	0.04079	0.05441	4.74377	0.060184	1	0.806205
OG0004443	0.02629	18	-1313.07	19	-1312.13	0.02805	0.0001	2.4982	1.87864	1	0.170489
OG0004459	0.08948	18	-3053.18	19	-3052.99	0.08764	0.11723	3.17926	0.377222	1	0.539094
OG0004433	0.0086	18	-2592.43	19	-2592.2	0.0089	0.0001	7.30401	0.46371	1	0.495895
OG0004428	0.18757	18	-2802.12	19	-2800.1	0.20199	0.07615	1.87382	4.04551	1	0.0442889
OG0004449	0.3101	18	-5172.49	19	-5171.77	0.31855	0.21176	3.88029	1.43664	1	0.230684
OG0004470	0.30107	18	-3251.11	19	-3251.01	0.3059	0.25774	3.37816	0.198878	1	0.655628
OG0004420	0.08061	18	-3660.83	19	-3660.67	0.07906	0.10297	8.47948	0.317026	1	0.5734
OG0004456	0.07693	18	-4204.81	19	-4204.79	0.07739	0.06967	4.08465	0.047688	1	0.827136
OG0004524	0.0058	18	-1465.59	19	-1465.48	0.00615	0.0001	2.49861	0.225148	1	0.635145
OG0004438	0.04105	18	-2068.3	19	-2067.96	0.03943	0.12044	6.41565	0.66454	1	0.414962
OG0004494	0.14738	18	-1783.93	19	-1783.54	0.15266	0.07338	1.93053	0.77034	1	0.380112
OG0004441	0.02143	18	-3093.02	19	-3092.43	0.02193	0.0001	6.31613	1.18879	1	0.275574
OG0004526	0.24201	18	-3001.26	19	-3000.51	0.23108	0.37452	2.74799	1.49396	1	0.221603
OG0004432	0.16851	18	-4241.34	19	-4241.08	0.1649	0.21551	4.89908	0.536228	1	0.464
OG0004492	0.03107	18	-2072.6	19	-2071.32	0.02909	0.14305	3.18477	2.55524	1	0.109929
OG0004481	0.1605	18	-3780.25	19	-3780.01	0.16358	0.12688	2.42668	0.482284	1	0.48739
OG0004490	0.04738	18	-1619.69	19	-1619.41	0.04817	0.0001	1.74975	0.554256	1	0.456584
OG0004489	0.02613	18	-963.859	19	-963.286	0.02894	0.0001	4.07813	1.14702	1	0.284174
OG0004392	0.12085	18	-2464.91	19	-2464.64	0.12355	0.0799	2.87052	0.538692	1	0.462975
OG0004530	0.0315	18	-1206.63	19	-1206.15	0.03272	0.0001	2.61384	0.961476	1	0.326815
OG0004359	0.00869	18	-3922.51	19	-3921.94	0.00905	0.0001	3.24572	1.14375	1	0.28486
OG0004464	0.17649	18	-5200.22	19	-5200.22	0.17638	0.17773	5.65417	0.000536	1	0.981529
OG0004368	0.08676	18	-2326.29	19	-2325.15	0.08179	0.24558	3.73076	2.29597	1	0.12971
OG0004462	0.03851	18	-2198.03	19	-2197.17	0.03463	0.18832	2.04386	1.71372	1	0.190503
OG0004515	0.08924	18	-1891.94	19	-1890.48	0.09516	0.02151	5.09177	2.91447	1	0.0877885
OG0004382	0.07594	18	-1492.96	19	-1492.62	0.07706	0.0001	4.27971	0.67759	1	0.410418
OG0004483	0.02534	18	-2158.37	19	-2158.37	0.02549	0.02284	2.17843	0.010892	1	0.91688
OG0004435	0.06867	18	-5447.71	19	-5447.28	0.06691	0.10504	2.61338	0.862768	1	0.352965
OG0004390	0.07763	18	-2510.06	19	-2509.8	0.07471	0.12736	6.08835	0.518122	1	0.471644
OG0004467	0.22322	18	-3735.31	19	-3734.64	0.21602	0.33225	4.57152	1.33033	1	0.248747
OG0004388	0.03461	18	-3145.5	19	-3145.47	0.03429	0.03969	4.16146	0.047082	1	0.828221
OG0004474	0.0215	18	-2115.73	19	-2114.88	0.02305	0.0001	3.78501	1.70639	1	0.191454
OG0004383	0.14722	18	-2216.6	19	-2216.6	0.14783	0.1386	3.70442	0.010872	1	0.916956
OG0004427	0.05791	18	-3641.02	19	-3640.23	0.05482	0.09975	5.04901	1.58323	1	0.208295
OG0004440	0.01673	18	-3548.23	19	-3548.15	0.01633	0.02267	5.97392	0.16461	1	0.684947
OG0004498	0.11754	18	-3820.9	19	-3820.48	0.11414	0.16798	3.05177	0.835778	1	0.360607
OG0004501	0.03673	18	-1832.69	19	-1831.71	0.03983	0.01157	1.75672	1.95624	1	0.161916
OG0004453	0.04632	18	-2142.92	19	-2141.11	0.03767	0.19021	4.18376	3.61407	1	0.0572928
OG0004491	0.03254	18	-2484.31	19	-2483.1	0.03398	0.0001	6.71798	2.42308	1	0.119559
OG0004488	0.03469	18	-1679.29	19	-1679.2	0.03547	0.02304	3.02092	0.18274	1	0.669029
OG0004426	0.08145	18	-4276.29	19	-4272.91	0.08682	0.00719	2.95945	6.74603	1	0.00939564
OG0004510	0.0117	18	-1579.9	19	-1579.54	0.01229	0.0001	7.07365	0.726272	1	0.394094
OG0004508	0.19018	18	-4229.01	19	-4228.5	0.18457	0.25687	4.60629	1.02426	1	0.31151
OG0004434	0.13884	18	-6047.16	19	-6043.59	0.14655	0.05029	3.4052	7.14078	1	0.00753504
OG0004380	0.11796	18	-2563.02	19	-2563.01	0.11829	0.11187	2.54703	0.006758	1	0.934482
OG0004473	0.04924	18	-4670.67	19	-4665.3	0.04212	0.18118	6.72935	10.7493	1	0.0010432
OG0004360	0.15283	18	-6994.26	19	-6992.07	0.15871	0.07873	3.74961	4.36526	1	0.0366788
OG0004352	0.1283	18	-6671.12	19	-6671.12	0.12795	0.13171	3.44545	0.010564	1	0.918137
OG0004369	0.3187	18	-7915.21	19	-7906.27	0.28696	0.74171	2.97208	17.8741	1	2.3601e-05
OG0004448	0.07878	18	-4790.6	19	-4790.56	0.07935	0.06745	3.43688	0.08466	1	0.771079
OG0004500	0.02961	18	-5009.92	19	-5008.75	0.02749	0.06603	3.92006	2.3487	1	0.125387
OG0004463	0.06441	18	-5997.33	19	-5996.01	0.06739	0.02355	4.49419	2.65081	1	0.103497
OG0004411	0.14788	18	-5066.49	19	-5066.16	0.14489	0.1919	4.44411	0.672244	1	0.41227
OG0004385	0.10424	18	-5169.61	19	-5166.98	0.09746	0.21532	2.29338	5.26454	1	0.0217642
OG0004486	0.07891	18	-4095.92	19	-4093.23	0.08559	0.01399	5.27805	5.39395	1	0.0202067
OG0004507	0.08158	18	-2424.53	19	-2423.23	0.08818	0.01647	4.90347	2.61039	1	0.106166
OG0004384	0.11648	18	-4711.08	19	-4710.87	0.11497	0.14911	2.64435	0.414018	1	0.519937
OG0004366	0.03046	18	-4312.13	19	-4310.24	0.03235	0.0001	5.55643	3.78658	1	0.0516652
OG0004506	0.01999	18	-3360.4	19	-3359.74	0.02046	0.0001	4.00108	1.32631	1	0.249462
OG0004460	0.09923	18	-6001.53	19	-5998.83	0.09309	0.1883	3.89009	5.4079	1	0.0200458
OG0004538	0.02391	18	-3262.78	19	-3254.88	0.01796	0.15976	2.89159	15.8	1	7.0404e-05
OG0004480	0.07024	18	-3504.21	19	-3497.67	0.07752	0.0001	5.29598	13.0706	1	0.000299973
OG0004532	0.09194	18	-2870.48	19	-2870.4	0.09317	0.07396	2.58212	0.16037	1	0.688816
OG0004439	0.16904	18	-6404.88	19	-6404.53	0.17159	0.12214	2.50288	0.69694	1	0.403814
OG0004379	0.01641	18	-5826.06	19	-5825.62	0.01576	0.03	6.9101	0.871054	1	0.350664
OG0004406	0.15468	18	-6807.88	19	-6807.87	0.15435	0.15826	5.34064	0.007772	1	0.92975
OG0004423	0.05354	18	-3434.47	19	-3433.99	0.05505	0.02761	4.5057	0.967188	1	0.325382
OG0004534	0.093	18	-2614.96	19	-2614.9	0.094	0.07504	1.92616	0.121252	1	0.727681
OG0004355	0.13065	18	-6053.21	19	-6052.82	0.13413	0.10004	4.24567	0.787716	1	0.374792
OG0004493	0.29135	18	-5567.23	19	-5566.83	0.29747	0.2178	2.88201	0.801042	1	0.370782
OG0004527	0.03789	18	-2514.62	19	-2514.56	0.03712	0.0478	3.60292	0.121232	1	0.727702
OG0004496	0.11265	18	-5386.58	19	-5385.33	0.10844	0.20607	7.65748	2.48863	1	0.114672
OG0004396	0.06179	18	-2179.42	19	-2178.15	0.06453	0.0001	2.55215	2.55066	1	0.110248
OG0004429	0.04837	18	-5449.95	19	-5449.32	0.0503	0.02661	4.69832	1.25307	1	0.262968
OG0004404	0.05053	18	-3374.08	19	-3374.05	0.05152	0.04212	5.42511	0.066724	1	0.796168
OG0004528	0.1779	18	-4436.65	19	-4435.73	0.18443	0.11191	4.00369	1.83547	1	0.175483
OG0004455	0.06126	18	-4849.1	19	-4848.83	0.06276	0.04263	3.96458	0.539974	1	0.462444
OG0004520	0.0412	18	-4405.74	19	-4404.89	0.04302	0.01437	4.89146	1.69587	1	0.192829
OG0004536	0.23758	18	-4391.37	19	-4390.62	0.22699	0.3326	2.18986	1.50067	1	0.220568
OG0004499	0.02336	18	-3864.98	19	-3861.83	0.02012	0.07557	6.08201	6.30368	1	0.0120488
OG0004479	0.09685	18	-4747.03	19	-4746.94	0.09774	0.08163	2.10133	0.182076	1	0.669595
OG0004537	0.35858	18	-5086.39	19	-5085.77	0.34565	0.54045	1.82983	1.24073	1	0.265331
OG0004375	0.09661	18	-4342.73	19	-4339.78	0.08785	0.20233	4.33513	5.89502	1	0.0151837
OG0004471	0.10511	18	-3720.99	19	-3720.47	0.10231	0.16375	4.75299	1.03141	1	0.309827
OG0004409	0.11584	18	-3898.18	19	-3898.16	0.11502	0.12476	4.32633	0.043826	1	0.834178
OG0004504	0.01171	18	-3379.27	19	-3378.88	0.01201	0.0001	4.2027	0.772196	1	0.379539
OG0004416	0.0804	18	-4426.29	19	-4426.19	0.08134	0.06291	4.06544	0.208086	1	0.648272
OG0004495	0.14604	18	-6596.9	19	-6595.95	0.15025	0.09626	5.73481	1.88945	1	0.169264
OG0004391	0.11717	18	-5549.74	19	-5549.59	0.11875	0.0969	6.05907	0.314372	1	0.57501
OG0004425	0.0345	18	-4188.46	19	-4187.74	0.0363	0.01255	2.88253	1.43351	1	0.231192
OG0004475	0.07408	18	-3935.66	19	-3935.63	0.07353	0.08375	3.78715	0.064228	1	0.799934
OG0004353	0.12444	18	-5044.51	19	-5042.99	0.11972	0.27966	4.55793	3.03294	1	0.0815903
OG0004457	0.06452	18	-5409.49	19	-5409.47	0.06487	0.0604	1.6079	0.030988	1	0.860267
OG0004371	0.07667	18	-6358.24	19	-6356.89	0.07927	0.02701	5.99114	2.6977	1	0.100493
OG0004387	0.09881	18	-6573.67	19	-6573.65	0.0984	0.10667	2.86134	0.04546	1	0.83116
OG0004370	0.0296	18	-3998.73	19	-3996.93	0.03197	0.0001	2.80755	3.60341	1	0.0576611
OG0004514	0.13852	18	-4466.33	19	-4466.05	0.1357	0.18438	2.78707	0.574846	1	0.44834
OG0004512	0.21956	18	-5504.42	19	-5504.3	0.21667	0.2561	3.55924	0.23906	1	0.624886
OG0004487	0.0432	18	-6003.93	19	-6003.78	0.04372	0.02951	3.48994	0.288694	1	0.591059
OG0004531	0.02213	18	-4572.99	19	-4572.33	0.02335	0.00957	4.45851	1.3332	1	0.248237
OG0004529	0.12156	18	-3387.14	19	-3383.95	0.12739	0.0001	4.83734	6.39353	1	0.0114537
OG0004401	0.08276	18	-4322.73	19	-4322.41	0.08561	0.05269	4.68611	0.630896	1	0.427027
OG0004414	0.0972	18	-4886.08	19	-4885.9	0.0959	0.12972	2.2667	0.342484	1	0.558399
OG0004503	0.01447	18	-3653.08	19	-3652.47	0.01526	0.0001	6.76323	1.23368	1	0.266693
OG0004400	0.15662	18	-6174.46	19	-6174.34	0.15467	0.17808	4.44443	0.232788	1	0.629464
OG0004356	0.16889	18	-7123.57	19	-7122.15	0.16112	0.24908	4.89591	2.85636	1	0.0910132
OG0004465	0.10439	18	-6693.85	19	-6693.75	0.10542	0.08856	5.32598	0.205214	1	0.650545
OG0004407	0.15895	18	-7964.79	19	-7963.2	0.16417	0.09254	6.02989	3.1805	1	0.0745217
OG0004367	0.09348	18	-4412.35	19	-4412.21	0.09212	0.12366	4.20273	0.271244	1	0.602499
OG0004393	0.03739	18	-5239.24	19	-5238.69	0.03864	0.01886	4.04448	1.11343	1	0.291338
OG0004523	0.0508	18	-3980.28	19	-3980.1	0.04929	0.07498	4.85696	0.357576	1	0.549856
OG0004477	0.13645	18	-5378.73	19	-5377.68	0.14118	0.06404	2.74164	2.10182	1	0.147124
OG0004363	0.17913	18	-6564.61	19	-6564.29	0.17567	0.23327	5.40019	0.656208	1	0.417902
OG0004509	0.16904	18	-6731.42	19	-6731.35	0.16793	0.19272	4.88371	0.124294	1	0.724423
OG0004511	0.05215	18	-5144.02	19	-5143.27	0.05431	0.02371	5.34919	1.51003	1	0.219135
OG0004497	0.11203	18	-6017.61	19	-6016.41	0.11649	0.04652	3.73527	2.40568	1	0.120896
OG0004419	0.08742	18	-8564.57	19	-8564.03	0.08941	0.06388	4.08534	1.08879	1	0.29674
OG0004568	0.15434	18	-1555.28	19	-1555.16	0.1567	0.09045	2.38209	0.254038	1	0.614246
OG0004543	0.27052	18	-1691.81	19	-1691.44	0.27974	0.13726	3.80513	0.735998	1	0.390946
OG0004417	0.0361	18	-7137.21	19	-7135.41	0.03819	0.00585	2.90577	3.58889	1	0.058167
OG0004472	0.08133	18	-7855.45	19	-7854.49	0.08441	0.04856	3.12065	1.91185	1	0.166758
OG0004556	0.00276	18	-1048.05	19	-1047.99	0.00293	0.0001	5.98404	0.110146	1	0.739978
OG0004570	0.03065	18	-1118.37	19	-1118.17	0.03137	0.0001	6.23971	0.382148	1	0.536456
OG0004545	0.10626	18	-2177.2	19	-2175.38	0.0979	0.23937	4.00943	3.6434	1	0.0562918
OG0004598	0.22793	18	-1782.89	19	-1782.24	0.23774	0.123	2.7763	1.29889	1	0.254415
OG0004550	0.04261	18	-1779.89	19	-1778.54	0.04011	0.17836	2.74965	2.698	1	0.100474
OG0004551	0.20085	18	-3005.55	19	-3005.49	0.19902	0.23829	3.83081	0.131756	1	0.716618
OG0004430	0.16159	18	-9449.44	19	-9448.95	0.16442	0.12829	2.16415	0.969504	1	0.324804
OG0004585	0.05212	18	-2728.37	19	-2727.75	0.04899	0.10394	2.5057	1.23926	1	0.265613
OG0004560	0.0307	18	-4111.66	19	-4105.41	0.0227	0.10323	2.97083	12.4915	1	0.000408804
OG0004581	0.05201	18	-3651.33	19	-3649.19	0.04752	0.13574	3.09071	4.2712	1	0.0387636
OG0004586	0.31767	18	-6365.58	19	-6365.38	0.32259	0.26888	3.24167	0.401514	1	0.526308
OG0004584	0.03083	18	-2484.19	19	-2483.86	0.03246	0.0001	7.3881	0.676564	1	0.410772
OG0004566	0.05662	18	-4818.14	19	-4818.09	0.05619	0.06803	5.9408	0.101732	1	0.749761
OG0004502	0.03651	18	-4658.94	19	-4658.84	0.03532	0.04584	3.77838	0.19524	1	0.658591
OG0004580	0.04206	18	-3471.25	19	-3470.87	0.04034	0.06636	4.34216	0.74651	1	0.387583
OG0004547	0.07825	18	-3419.24	19	-3418.98	0.08064	0.0395	2.52967	0.51781	1	0.471777
OG0004563	0.11831	18	-5202.48	19	-5202.47	0.11862	0.1122	2.96543	0.016552	1	0.897631
OG0004591	0.03147	18	-4939.15	19	-4939.15	0.03159	0.02933	6.32809	0.012396	1	0.911349
OG0004588	0.03627	18	-3377.57	19	-3376.48	0.0373	0.0001	2.0832	2.17786	1	0.140009
OG0004553	0.03201	18	-4562.58	19	-4562.58	0.0319	0.03358	5.73802	0.007704	1	0.930058
OG0004575	0.20212	18	-5266.08	19	-5265.75	0.19849	0.2698	4.68124	0.67079	1	0.412776
OG0004572	0.07952	18	-4520.45	19	-4513.49	0.08938	0.0001	3.87626	13.9267	1	0.000190076
OG0004578	0.12697	18	-5754.91	19	-5754	0.13004	0.06129	4.73858	1.82278	1	0.176982
OG0004594	0.01711	18	-3982.21	19	-3982.15	0.01681	0.02232	4.89925	0.126704	1	0.721874
OG0004552	0.20121	18	-5295.13	19	-5292.25	0.21113	0.08007	3.8014	5.76038	1	0.0163916
OG0004564	0.11872	18	-4414.7	19	-4414.68	0.11816	0.13151	5.48349	0.040958	1	0.839619
OG0004595	0.09552	18	-2957.4	19	-2957.37	0.09636	0.08117	4.81752	0.071804	1	0.788728
OG0004539	0.04848	18	-5916.13	19	-5914.2	0.04462	0.14795	2.97391	3.86728	1	0.0492363
OG0004590	0.11328	18	-6258.33	19	-6258.13	0.11458	0.08631	4.32427	0.410834	1	0.521547
OG0004583	0.00996	18	-5316.83	19	-5315.53	0.00845	0.03078	3.03948	2.61461	1	0.105883
OG0004549	0.03523	18	-3421.31	19	-3420.7	0.04102	0.0001	7.29058	1.22784	1	0.267828
OG0004565	0.07203	18	-6595.14	19	-6595.12	0.07167	0.07745	4.58658	0.04532	1	0.831417
OG0004582	0.08433	18	-6018.44	19	-6018.42	0.08524	0.07587	2.67816	0.040466	1	0.840572
OG0004544	0.0858	18	-7074.18	19	-7073.68	0.0886	0.06141	2.64023	0.998522	1	0.317668
OG0004555	0.03809	18	-5354.52	19	-5352.59	0.03443	0.11194	3.5264	3.87331	1	0.0490598
OG0004601	0.16811	18	-3290.51	19	-3290.33	0.16434	0.20775	5.04975	0.366834	1	0.544735
OG0004603	0.0194	18	-3915.3	19	-3915.21	0.02005	0.01457	2.8849	0.169376	1	0.680667
OG0004599	0.07366	18	-3412.87	19	-3412.78	0.07228	0.08962	3.47095	0.170812	1	0.679391
OG0004604	0.33376	18	-3936.11	19	-3935.35	0.32095	0.49864	3.23688	1.51308	1	0.21867
OG0004589	0.22238	18	-9817.64	19	-9817.49	0.22293	0.13213	3.90799	0.318566	1	0.572471
OG0004610	0.00267	18	-1306.49	19	-1306.43	0.00271	0.0001	2.61185	0.101752	1	0.749737
OG0004617	0.16372	18	-1648.46	19	-1648.2	0.1701	0.10985	2.09907	0.519454	1	0.471075
OG0004618	0.1289	18	-2043.1	19	-2042.65	0.12458	0.23805	4.48549	0.89752	1	0.343448
OG0004611	0.21571	18	-3546.28	19	-3545.84	0.22191	0.15133	5.94893	0.882622	1	0.347485
OG0004609	0.15471	18	-2771.95	19	-2771.46	0.16011	0.07434	5.2167	0.990594	1	0.319597
OG0004622	0.11966	18	-2720.47	19	-2717.95	0.10508	0.25452	3.85239	5.05079	1	0.0246147
OG0004621	0.15509	18	-5865.1	19	-5865.04	0.15647	0.14057	2.78605	0.11405	1	0.73558
OG0004612	0.39605	18	-8223.33	19	-8222.65	0.40373	0.28698	3.6722	1.35816	1	0.243856
OG0004614	0.28499	18	-7204.18	19	-7201.32	0.29678	0.13093	2.82475	5.71134	1	0.0168557
OG0004619	0.08533	18	-6510.17	19	-6509.74	0.0827	0.11576	3.95732	0.857716	1	0.354379
OG0004717	0.51605	18	-1076.33	19	-1076.16	0.49828	0.77211	4.98209	0.33451	1	0.563015
OG0004629	0.11608	18	-1176.27	19	-1174.37	0.12728	0.0001	3.36066	3.8124	1	0.0508744
OG0004721	0.09091	18	-1657.69	19	-1657.29	0.09437	0.04816	3.84229	0.785156	1	0.375569
OG0004624	0.29018	18	-2253.63	19	-2253.3	0.28154	0.41214	3.89871	0.65854	1	0.417076
OG0004705	0.12479	18	-1814.92	19	-1814.28	0.13048	0.05741	3.81876	1.27822	1	0.25823
OG0004729	0.07622	18	-910.32	19	-910.275	0.0745	0.10792	4.58151	0.089768	1	0.764472
OG0004636	0.2728	18	-2262.18	19	-2260.69	0.2577	0.75218	2.78591	2.97103	1	0.0847681
OG0004625	0.09508	18	-2616.08	19	-2614.07	0.0896	0.31594	3.6592	4.01076	1	0.0452107
OG0004725	0.00856	18	-2253.31	19	-2253.03	0.00881	0.0001	3.9846	0.566452	1	0.451672
OG0004651	0.14082	18	-3550.94	19	-3548.43	0.15153	0.05728	2.95123	5.01338	1	0.0251522
OG0004731	0.16889	18	-2974.28	19	-2973.63	0.17472	0.09074	6.12716	1.30136	1	0.253964
OG0004722	0.07362	18	-1521.63	19	-1521.15	0.07532	0.0001	2.93766	0.976628	1	0.323033
OG0004730	0.1441	18	-2621.64	19	-2621.61	0.14324	0.16039	4.0084	0.0405	1	0.840506
OG0004606	0.02236	18	-1192.58	19	-1191.74	0.02666	0.0001	6.37525	1.68498	1	0.194264
OG0004744	0.01002	18	-971.627	19	-971.596	0.01034	0.0001	4.83195	0.061332	1	0.804403
OG0004639	0.11599	18	-3004.45	19	-3004.37	0.11695	0.08567	2.22648	0.154992	1	0.69381
OG0004702	0.02448	18	-2450.48	19	-2450.44	0.024	0.03037	6.39996	0.083878	1	0.772109
OG0004627	0.10246	18	-2832.63	19	-2832.62	0.10303	0.09487	3.9474	0.025512	1	0.873098
OG0004642	0.18738	18	-5026.16	19	-5026.14	0.18637	0.1989	3.66431	0.041344	1	0.838875
OG0004626	0.19492	18	-2626.99	19	-2626.94	0.19669	0.15291	3.56973	0.098256	1	0.753933
OG0004623	0.35773	18	-3919.33	19	-3919.26	0.36211	0.31376	2.89756	0.142608	1	0.705702
OG0004754	0.43995	18	-1613.26	19	-1613.11	0.45089	0.28309	4.22347	0.299526	1	0.58418
OG0004726	0.15904	18	-4426.39	19	-4425.39	0.15202	0.23836	3.87253	2.00711	1	0.156564
OG0004757	0.01461	18	-1160.42	19	-1159.92	0.01562	0.0001	6.11404	0.99953	1	0.317424
OG0004760	0.1959	18	-3431.78	19	-3431.32	0.20081	0.13631	3.89141	0.916064	1	0.338511
OG0004736	0.15707	18	-1496.95	19	-1496.84	0.15322	0.22057	2.35092	0.211928	1	0.64526
OG0004648	0.06479	18	-5971.89	19	-5960.07	0.05294	0.21182	4.63256	23.6383	1	1.162e-06
OG0004763	0.01549	18	-1076.36	19	-1075.82	0.01668	0.0001	3.76243	1.07824	1	0.299092
OG0004732	0.168	18	-3461.41	19	-3461.37	0.16679	0.19137	3.90529	0.085426	1	0.770075
OG0004723	0.05021	18	-2549.31	19	-2548.76	0.05303	0.01986	3.81526	1.09661	1	0.295011
OG0004775	0.08133	18	-2499.85	19	-2497.46	0.08943	0.01514	6.21228	4.7745	1	0.0288843
OG0004718	0.08923	18	-4260.11	19	-4258.99	0.09259	0.04342	3.97646	2.23351	1	0.135047
OG0004673	0.23535	18	-1150.68	19	-1149.34	0.2614	0.05575	2.89614	2.68099	1	0.101553
OG0004720	0.05345	18	-6206.05	19	-6205.7	0.05455	0.0351	4.69708	0.712596	1	0.398583
OG0004765	0.16474	18	-2906.73	19	-2906.21	0.16065	0.30826	3.13384	1.03499	1	0.30899
OG0004755	0.03635	18	-1849.33	19	-1849.28	0.03504	0.04569	4.21971	0.101262	1	0.75032
OG0004684	0.1236	18	-920.252	19	-919.162	0.1375	0.0001	2.37092	2.17966	1	0.139845
OG0004608	0.0541	18	-2655.74	19	-2655.74	0.05418	0.05271	4.12766	0.001156	1	0.972877
OG0004727	0.04506	18	-3642.5	19	-3641.67	0.04751	0.0201	3.48774	1.64709	1	0.199355
OG0004637	0.17079	18	-4938.26	19	-4937.8	0.1746	0.11848	4.29248	0.918668	1	0.337825
OG0004716	0.07083	18	-3809.43	19	-3809.43	0.07076	0.07146	2.2172	0.000408	1	0.983885
OG0004711	0.03179	18	-4391	19	-4389.44	0.02919	0.06994	5.48568	3.13421	1	0.0766654
OG0004656	0.00446	18	-928.909	19	-927.266	0.00233	0.04904	2.2296	3.28606	1	0.0698706
OG0004741	0.27007	18	-3910.2	19	-3909.36	0.2778	0.14414	3.07734	1.67788	1	0.195206
OG0004703	0.13023	18	-4621.04	19	-4620.5	0.12587	0.19165	4.16361	1.08099	1	0.298477
OG0004751	0.14956	18	-4031.73	19	-4028.31	0.15887	0.03916	3.06161	6.84273	1	0.00890026
OG0004644	0.04357	18	-2974.54	19	-2974.42	0.04186	0.05662	2.52806	0.237366	1	0.626115
OG0004686	0.02827	18	-2774.95	19	-2774.94	0.02812	0.0312	3.74655	0.012764	1	0.910048
OG0004634	0.01308	18	-3251.25	19	-3250.9	0.01369	0.0001	5.06342	0.696996	1	0.403795
OG0004714	0.05475	18	-4613.17	19	-4613.05	0.05376	0.0673	2.65271	0.235978	1	0.627126
OG0004734	0.12781	18	-5484.18	19	-5484.16	0.12697	0.13826	4.73614	0.04931	1	0.824268
OG0004672	0.16736	18	-2648.17	19	-2647.93	0.16317	0.23111	5.98162	0.477152	1	0.489715
OG0004692	0.20215	18	-2903.54	19	-2901.04	0.21367	0.0552	5.20148	5.00848	1	0.0252234
OG0004764	0.09971	18	-3338.61	19	-3337.68	0.10356	0.04952	4.52771	1.86786	1	0.17172
OG0004782	0.13356	18	-3066.95	19	-3065.33	0.12005	0.28426	2.1462	3.23714	1	0.0719861
OG0004679	0.0326	18	-3383.79	19	-3383.57	0.03151	0.04707	4.09478	0.44196	1	0.506178
OG0004661	0.02427	18	-2745.58	19	-2744.63	0.02216	0.05456	6.14337	1.88429	1	0.169847
OG0004681	0.16389	18	-4905.14	19	-4903.83	0.15658	0.26562	4.49931	2.62785	1	0.105004
OG0004641	0.12565	18	-5704.87	19	-5703.16	0.13306	0.05045	4.06474	3.41404	1	0.064644
OG0004713	0.09227	18	-2507.78	19	-2506	0.09841	0.02601	3.6453	3.55787	1	0.0592636
OG0004689	0.01246	18	-1985.06	19	-1984.53	0.01301	0.0001	2.97232	1.05837	1	0.303588
OG0004669	0.01704	18	-2334.61	19	-2334.17	0.01762	0.0001	5.11757	0.883958	1	0.34712
OG0004688	0.35857	18	-3949.89	19	-3948.8	0.37515	0.21852	4.586	2.17819	1	0.139979
OG0004780	0.14713	18	-2438.55	19	-2438.52	0.14855	0.12877	3.76309	0.05774	1	0.810104
OG0004748	0.0939	18	-4805.39	19	-4804.65	0.09073	0.14364	4.19166	1.48093	1	0.223628
OG0004743	0.01137	18	-3195.34	19	-3194.43	0.0123	0.0001	5.88032	1.82139	1	0.177147
OG0004701	0.04348	18	-5307.77	19	-5307.7	0.04288	0.05079	5.50315	0.136918	1	0.711364
OG0004678	0.08185	18	-4754.24	19	-4754.1	0.08049	0.09855	4.4671	0.284896	1	0.59351
OG0004766	0.12517	18	-4111.39	19	-4111.26	0.12716	0.1008	3.33802	0.272654	1	0.601557
OG0004633	0.06001	18	-3626.39	19	-3625.95	0.06183	0.02556	4.52788	0.869972	1	0.350963
OG0004605	0.15879	18	-6779.37	19	-6778.59	0.16315	0.10525	4.35928	1.5737	1	0.20967
OG0004776	0.03479	18	-4040.44	19	-4040.42	0.03444	0.03872	2.62615	0.033512	1	0.854749
OG0004707	0.08772	18	-4769.78	19	-4768.68	0.08363	0.14097	4.03609	2.20863	1	0.137241
OG0004657	0.08666	18	-2696.9	19	-2696.9	0.08662	0.08715	3.66151	8.8e-05	1	0.992515
OG0004649	0.19952	18	-4707.22	19	-4707.07	0.20267	0.16908	3.72955	0.310798	1	0.577191
OG0004658	0.08004	18	-2780.47	19	-2780.39	0.08217	0.05482	7.34341	0.150028	1	0.698509
OG0004646	0.08648	18	-5423.27	19	-5422.49	0.0895	0.05527	5.55216	1.5682	1	0.210468
OG0004667	0.07212	18	-4479.64	19	-4479.62	0.0716	0.08221	4.12972	0.039742	1	0.841986
OG0004728	0.07274	18	-4925.75	19	-4925.29	0.07045	0.11464	4.00776	0.9173	1	0.338185
OG0004697	0.08316	18	-3455.98	19	-3454.22	0.06959	0.21519	3.1276	3.53121	1	0.0602237
OG0004752	0.07711	18	-6074.75	19	-6074.45	0.07577	0.10309	4.30431	0.60106	1	0.438174
OG0004670	0.03548	18	-4969.87	19	-4968.97	0.03684	0.01733	5.51133	1.80543	1	0.179058
OG0004653	0.14787	18	-7312.96	19	-7312.86	0.14907	0.12914	3.84021	0.192438	1	0.660895
OG0004693	0.00605	18	-1228.53	19	-1227.83	0.00445	0.02388	3.2105	1.40027	1	0.236679
OG0004767	0.09113	18	-6338.89	19	-6338.89	0.09098	0.09317	2.97702	0.004068	1	0.949145
OG0004666	0.01471	18	-4279.38	19	-4278.85	0.01563	0.0001	5.82219	1.05926	1	0.303384
OG0004652	0.14419	18	-8991.26	19	-8989.73	0.14783	0.08533	3.05247	3.05548	1	0.0804654
OG0004771	0.0734	18	-5302.05	19	-5300.07	0.06933	0.147	4.12167	3.96158	1	0.04655
OG0004753	0.17968	18	-5923.02	19	-5920.73	0.18776	0.08106	4.09401	4.58826	1	0.0321917
OG0004746	0.11475	18	-5024.63	19	-5024.55	0.11368	0.13265	5.24344	0.152782	1	0.695891
OG0004694	0.02018	18	-6188.75	19	-6185.85	0.02121	0.0001	5.51967	5.80315	1	0.0159975
OG0004737	0.08869	18	-4648.39	19	-4647.08	0.09259	0.02615	3.40899	2.6214	1	0.105431
OG0004674	0.03174	18	-3576.2	19	-3573.69	0.0343	0.0001	2.4767	5.02838	1	0.0249352
OG0004773	0.04156	18	-3808.7	19	-3808.6	0.04217	0.03006	4.48943	0.207236	1	0.648942
OG0004740	0.0397	18	-5537.26	19	-5535.07	0.03631	0.09193	4.50856	4.37193	1	0.0365356
OG0004739	0.11434	18	-4858.92	19	-4858.6	0.111	0.14774	6.18023	0.642562	1	0.422785
OG0004675	0.10152	18	-5454.74	19	-5454.61	0.10265	0.08512	3.01207	0.259528	1	0.610445
OG0004682	0.02981	18	-4467.45	19	-4467.34	0.0293	0.03839	4.36409	0.213718	1	0.643869
OG0004699	0.0472	18	-5969.61	19	-5968.31	0.04439	0.09137	2.81109	2.59934	1	0.106908
OG0004680	0.27327	18	-7104.5	19	-7104.46	0.27472	0.25629	3.74786	0.063492	1	0.801059
OG0004654	0.14626	18	-7686.63	19	-7686.47	0.14744	0.11222	2.7502	0.317586	1	0.573062
OG0004659	0.06492	18	-4445.7	19	-4443.04	0.05889	0.18365	6.28094	5.30808	1	0.0212267
OG0004762	0.08339	18	-4711.78	19	-4711.55	0.08489	0.05734	4.16825	0.443398	1	0.505487
OG0004663	0.06756	18	-5495.91	19	-5494.91	0.07155	0.03896	4.00665	1.99919	1	0.157383
OG0004761	0.10764	18	-2962.96	19	-2962.92	0.10576	0.1233	3.83768	0.073928	1	0.785701
OG0004660	0.05383	18	-5739.79	19	-5739.74	0.05345	0.06224	3.18726	0.099942	1	0.751899
OG0004774	0.03499	18	-3860.21	19	-3860.2	0.0347	0.03834	2.19517	0.030554	1	0.861239
OG0004631	0.06773	18	-5585.94	19	-5585.27	0.07007	0.03881	3.69673	1.33418	1	0.248063
OG0004700	0.04965	18	-5904.77	19	-5904.2	0.04804	0.07948	7.7307	1.14093	1	0.285456
OG0004719	0.29898	18	-9334.39	19	-9333.09	0.30659	0.18942	3.52478	2.60563	1	0.106485
OG0004770	0.06887	18	-6342.66	19	-6342.61	0.06819	0.08147	4.004	0.094654	1	0.758342
OG0004632	0.12479	18	-5945.3	19	-5945.22	0.12612	0.1086	5.13643	0.161216	1	0.688039
OG0004685	0.08673	18	-5857.42	19	-5857.4	0.08635	0.09391	3.0876	0.039584	1	0.842296
OG0004759	0.0935	18	-6168.04	19	-6167.36	0.09625	0.06353	3.51368	1.36468	1	0.242727
OG0004777	0.08037	18	-6121.68	19	-6121.64	0.07991	0.09007	2.40829	0.072924	1	0.787126
OG0004750	0.06448	18	-4911.17	19	-4910.19	0.06161	0.11429	2.34005	1.96524	1	0.160954
OG0004784	0.17291	18	-2065.18	19	-2065.13	0.17489	0.14307	2.85386	0.100754	1	0.750927
OG0004849	0.24554	18	-1829.75	19	-1829.59	0.23849	0.32245	2.83885	0.333046	1	0.563871
OG0004833	0.01215	18	-1601.85	19	-1601.72	0.01162	0.02251	5.66363	0.262336	1	0.60852
OG0004798	0.10713	18	-2407.08	19	-2407.08	0.1077	0.09906	4.93191	0.017114	1	0.895917
OG0004839	0.34053	18	-3493.49	19	-3493.49	0.33985	0.35218	2.77082	0.006424	1	0.936118
OG0004832	0.04455	18	-1940.14	19	-1940.1	0.04502	0.03289	2.03077	0.086594	1	0.768553
OG0004837	0.0225	18	-1895.03	19	-1895.03	0.0225	0.02256		6e-06	1	0.998046
OG0004846	0.36052	18	-3481.54	19	-3481.5	0.36357	0.32428	2.99833	0.086568	1	0.768586
OG0004801	0.06953	18	-3228.3	19	-3227.68	0.07282	0.03248	6.01627	1.23335	1	0.266756
OG0004834	0.0151	18	-1726.1	19	-1725.71	0.016	0.0001	5.00889	0.776058	1	0.378349
OG0004851	0.00249	18	-1406.16	19	-1406.05	0.00265	0.0001	5.0101	0.226572	1	0.634077
OG0004811	0.15826	18	-4371.16	19	-4371.16	0.1583	0.15772	2.30575	0.000104	1	0.991863
OG0004843	0.0001	18	-2143.38	19	-2143.38	0.0001	0.0001	6.64154	0	1	1
OG0004796	0.02438	18	-2364.38	19	-2364.32	0.02499	0.01753	2.69629	0.12259	1	0.726242
OG0004807	0.07336	18	-2331.62	19	-2331.62	0.07343	0.07186	1.76224	0.00057	1	0.980953
OG0004844	0.14064	18	-1629.64	19	-1629.52	0.1432	0.08516	2.88966	0.23342	1	0.628999
OG0004788	0.11036	18	-2657.02	19	-2656.75	0.11301	0.06475	4.37491	0.547926	1	0.459166
OG0004828	0.07094	18	-4140.06	19	-4139.03	0.07321	0.02053	4.21321	2.06567	1	0.150649
OG0004848	0.11839	18	-3537.91	19	-3537.24	0.12161	0.06139	5.0176	1.34554	1	0.246059
OG0004799	0.03255	18	-2941.42	19	-2941.36	0.0336	0.02448	2.78609	0.120298	1	0.728712
OG0004806	0.09317	18	-3592.77	19	-3592.73	0.09195	0.11058	3.47972	0.067734	1	0.794665
OG0004787	0.05039	18	-4279	19	-4277.79	0.05349	0.01954	2.76574	2.4217	1	0.119665
OG0004831	0.04028	18	-5212.95	19	-5212.84	0.04088	0.03079	5.68346	0.208306	1	0.648098
OG0004802	0.01239	18	-3016.36	19	-3015.56	0.01307	0.0001	7.29513	1.59433	1	0.206708
OG0004810	0.0214	18	-5555.18	19	-5555.11	0.02173	0.01662	7.76559	0.15578	1	0.693072
OG0004823	0.02	18	-4604.09	19	-4604.04	0.01976	0.0252	5.8308	0.095172	1	0.757702
OG0004805	0.2364	18	-8989.64	19	-8989.54	0.23808	0.21122	4.52431	0.185782	1	0.666451
OG0004819	0.09378	18	-6060.36	19	-6059.82	0.09607	0.06388	3.07316	1.06976	1	0.301
OG0004835	0.03195	18	-3801.04	19	-3800.97	0.0325	0.0231	3.02027	0.140074	1	0.708207
OG0004850	0.04578	18	-5616.37	19	-5614.28	0.04809	0.01039	4.67651	4.18034	1	0.0408956
OG0004816	0.11112	18	-5902.47	19	-5902.46	0.11071	0.11697	4.41288	0.02643	1	0.870855
OG0004841	0.08907	18	-6194.32	19	-6194.25	0.08981	0.07482	4.7837	0.15811	1	0.690903
OG0004856	0.05169	18	-4460.69	19	-4459.75	0.0494	0.0935	4.46051	1.86776	1	0.171731
OG0004829	0.25245	18	-7683.8	19	-7683.39	0.25659	0.19679	3.74445	0.805962	1	0.369317
OG0004855	0.03031	18	-3409.27	19	-3408.93	0.03137	0.01441	4.65766	0.688348	1	0.406727
OG0004838	0.03029	18	-5842.64	19	-5841.95	0.03164	0.0148	5.15861	1.3875	1	0.238828
OG0004792	0.16633	18	-5063.63	19	-5061.72	0.17454	0.07272	4.45039	3.82423	1	0.0505167
OG0004853	0.23589	18	-5858.37	19	-5858.19	0.23302	0.28673	2.39194	0.358848	1	0.549147
OG0004797	0.0256	18	-5281.76	19	-5281.17	0.02299	0.05732	2.35256	1.17452	1	0.278475
OG0004826	0.06566	18	-5890.94	19	-5889.83	0.06796	0.03199	3.25609	2.20379	1	0.137672
OG0004786	0.1654	18	-6937.59	19	-6936.81	0.17005	0.11802	6.16081	1.57493	1	0.209492
OG0004790	0.23818	18	-5943.22	19	-5942.69	0.23139	0.3358	3.6602	1.05676	1	0.303954
OG0004877	0.34708	18	-1665.65	19	-1665.12	0.36313	0.17014	3.18315	1.05375	1	0.304645
OG0004871	0.18048	18	-2931.55	19	-2931.53	0.17918	0.19043	3.40937	0.027182	1	0.869047
OG0004868	0.02951	18	-2648.59	19	-2647.52	0.02664	0.08216	4.44676	2.13591	1	0.143885
OG0004864	0.0867	18	-1860.76	19	-1858.19	0.09459	0.0001	2.93588	5.13356	1	0.0234675
OG0004863	0.02297	18	-1945.73	19	-1945.68	0.02257	0.03239	3.6536	0.098238	1	0.753954
OG0004859	0.19264	18	-3167.6	19	-3167.57	0.19111	0.21104	3.57667	0.052328	1	0.819061
OG0004867	0.36957	18	-5449.17	19	-5446.14	0.34967	0.78454	2.61908	6.05894	1	0.0138361
OG0004861	0.05888	18	-3804.19	19	-3803.65	0.05616	0.09626	4.48883	1.08206	1	0.298237
OG0004878	0.15019	18	-3171.12	19	-3170.73	0.14696	0.23908	3.73005	0.772416	1	0.379471
OG0004858	0.05573	18	-3298.37	19	-3298.36	0.05598	0.0535	4.91254	0.007172	1	0.93251
OG0004873	0.03002	18	-2158.28	19	-2158.28	0.02999	0.03099	4.84078	0.00089	1	0.9762
OG0004857	0.01869	18	-1857.3	19	-1856.65	0.02019	0.0001	8.49121	1.31601	1	0.25131
OG0004865	0.0402	18	-3754.71	19	-3753.39	0.04148	0.0001	2.65302	2.6291	1	0.104921
OG0004866	0.44245	18	-7459.35	19	-7458.32	0.42903	0.64782	3.33365	2.06386	1	0.150828
OG0004870	0.05908	18	-3803.21	19	-3803.21	0.05936	0.05471	4.31186	0.016002	1	0.899337
OG0004876	0.03085	18	-5227.38	19	-5227.09	0.03201	0.0203	1.77886	0.581108	1	0.445878
OG0004854	0.11019	18	-3291.45	19	-3291.2	0.10739	0.14787	3.00878	0.501382	1	0.478894
OG0004890	0.24426	18	-1657.24	19	-1657.16	0.2487	0.19731	3.74386	0.16946	1	0.680592
OG0004889	0.28939	18	-2089.92	19	-2089.8	0.2968	0.23707	4.50529	0.235908	1	0.627177
OG0004893	0.23611	18	-3459.03	19	-3458.96	0.23374	0.27477	3.12154	0.13286	1	0.715485
OG0004881	0.04017	18	-2271.54	19	-2269.69	0.0439	0.0001	4.8808	3.70548	1	0.0542342
OG0004888	0.25124	18	-4359.73	19	-4358.69	0.24156	0.39575	3.29502	2.09054	1	0.148214
OG0004892	0.03938	18	-2339.91	19	-2337.65	0.04287	0.0001	3.83523	4.51689	1	0.0335619
OG0004891	0.08502	18	-5085.37	19	-5084.58	0.08189	0.13732	4.85761	1.57922	1	0.208874
OG0004885	0.08757	18	-3048.04	19	-3047.95	0.08612	0.10501	5.64579	0.17007	1	0.68005
OG0004886	0.00946	18	-1704.87	19	-1704.41	0.01068	0.0001	2.02691	0.93517	1	0.333523
OG0004882	0.1387	18	-3595.7	19	-3595.7	0.13882	0.13744	4.35248	0.000644	1	0.979754
OG0004883	0.1213	18	-3981.29	19	-3981.1	0.11907	0.15839	5.43731	0.396372	1	0.528969
OG0004879	0.19369	18	-3885.4	19	-3884.03	0.20295	0.09088	3.50717	2.74894	1	0.0973188
OG0004917	0.06994	18	-767.196	19	-766.535	0.07758	0.0001	4.32183	1.32092	1	0.250427
OG0004899	0.11946	18	-1670.62	19	-1669.41	0.10761	0.27161	2.86936	2.40511	1	0.120939
OG0004981	0.00286	18	-1119.17	19	-1119.14	0.00295	0.0001	6.98401	0.05638	1	0.812312
OG0004898	0.05636	18	-1695.01	19	-1692.72	0.04835	0.24706	3.46852	4.58817	1	0.0321933
OG0004922	0.0001	18	-1569.34	19	-1569.34	0.0001	0.0001	2.37162	0	1	1
OG0004908	0.13578	18	-1579.94	19	-1578.1	0.14918	0.02853	4.21522	3.68307	1	0.0549674
OG0004911	0.1131	18	-2860.91	19	-2857.82	0.10111	0.22641	3.42516	6.17859	1	0.0129305
OG0004982	0.04007	18	-2107.65	19	-2107.35	0.03863	0.06457	3.69959	0.610648	1	0.434544
OG0004976	0.04834	18	-2033.9	19	-2033.89	0.04868	0.04169	6.55777	0.0205	1	0.886149
OG0004923	0.06639	18	-2004.19	19	-2004.19	0.06641	0.06608	4.26122	4e-05	1	0.994954
OG0004919	0.06222	18	-2180.97	19	-2180.94	0.06279	0.05378	2.69753	0.053904	1	0.816404
OG0004964	0.01159	18	-2755.06	19	-2755.05	0.01175	0.00875	4.75073	0.014014	1	0.905766
OG0004900	0.01401	18	-3538.84	19	-3537.03	0.01527	0.0001	1.46506	3.60991	1	0.0574363
OG0004959	0.16018	18	-1817.17	19	-1817.09	0.1625	0.11417	5.42305	0.16453	1	0.68502
OG0004894	0.01024	18	-1989.42	19	-1989.17	0.01063	0.0001	4.71426	0.492774	1	0.482692
OG0004916	0.3137	18	-2181.56	19	-2180.85	0.30246	0.73328	3.27161	1.42169	1	0.233125
OG0004934	0.07722	18	-2307.73	19	-2307.02	0.08006	0.02649	4.05974	1.42578	1	0.232454
OG0004926	0.21193	18	-2291.71	19	-2291.66	0.21015	0.26181	3.84304	0.100468	1	0.751269
OG0004905	0.12836	18	-2828.86	19	-2826.5	0.13816	0.04109	4.5456	4.71909	1	0.0298296
OG0004906	0.05181	18	-1757.92	19	-1756.49	0.05529	0.0001	2.51128	2.85505	1	0.0910873
OG0004991	0.01705	18	-1634.49	19	-1633.96	0.01817	0.0001	4.31294	1.07455	1	0.299919
OG0004927	0.39658	18	-3397.88	19	-3397.49	0.40417	0.2477	3.35764	0.779058	1	0.377429
OG0004930	0.10839	18	-3740.86	19	-3740.69	0.10678	0.14528	3.20743	0.34597	1	0.556403
OG0004988	0.08899	18	-2605.25	19	-2604.73	0.09186	0.04291	5.43156	1.03533	1	0.308911
OG0004914	0.02875	18	-2414.65	19	-2414.19	0.02963	0.0001	6.55951	0.90874	1	0.340449
OG0004985	0.04542	18	-3259.71	19	-3259.53	0.04628	0.02965	4.60607	0.358628	1	0.549269
OG0004944	0.16551	18	-3254.35	19	-3254.05	0.16911	0.11868	5.96914	0.586528	1	0.443765
OG0004912	0.11795	18	-2738.11	19	-2738.08	0.11731	0.14275	5.67145	0.04841	1	0.825853
OG0004977	0.02484	18	-2034.61	19	-2033.54	0.02245	0.09244	3.32591	2.13821	1	0.14367
OG0004980	0.07337	18	-2770.72	19	-2770.65	0.07434	0.05896	4.11536	0.12689	1	0.721679
OG0004940	0.21411	18	-2854.08	19	-2853.6	0.20659	0.32717	3.87193	0.956128	1	0.328164
OG0004903	0.11913	18	-2424.75	19	-2424.27	0.1234	0.0465	3.33196	0.961954	1	0.326695
OG0004951	0.08007	18	-3109.81	19	-3109.78	0.08056	0.0674	2.17772	0.051488	1	0.820494
OG0004904	0.05846	18	-2704.26	19	-2703.99	0.05532	0.15021	3.07511	0.546688	1	0.459674
OG0004942	0.15224	18	-3816.12	19	-3815.51	0.14757	0.24149	2.79818	1.20534	1	0.272257
OG0004913	0.03403	18	-3509.69	19	-3509.58	0.0333	0.04436	5.71143	0.232868	1	0.629405
OG0004897	0.02208	18	-4438.99	19	-4438.98	0.02219	0.01971	7.97764	0.015876	1	0.899732
OG0004973	0.1624	18	-2982.45	19	-2981.74	0.16847	0.08722	3.6543	1.41101	1	0.234889
OG0004946	0.25454	18	-4243.51	19	-4243.5	0.25392	0.26608	3.59506	0.011806	1	0.913476
OG0004979	0.06773	18	-2769.24	19	-2766.86	0.07357	0.0001	3.21484	4.75466	1	0.0292191
OG0004943	0.04012	18	-2969.97	19	-2969.34	0.04164	0.01306	6.21955	1.24352	1	0.264794
OG0004989	0.06019	18	-3376.65	19	-3376.5	0.06183	0.04424	6.62665	0.280324	1	0.596489
OG0004932	0.15818	18	-3208.18	19	-3206.4	0.14824	0.35192	3.34453	3.55432	1	0.0593908
OG0004925	0.18841	18	-3117.47	19	-3116.05	0.20129	0.04026	4.00095	2.83083	1	0.0924708
OG0004956	0.066	18	-3299.2	19	-3299.2	0.06584	0.0687	3.16402	0.004054	1	0.949232
OG0004967	0.1181	18	-2050.65	19	-2050.45	0.12167	0.07478	2.63649	0.391578	1	0.531471
OG0004920	0.0001	18	-2991.85	19	-2991.85	0.0001	0.0001	3.33852	0	1	1
OG0004948	0.07107	18	-4416.02	19	-4415.31	0.07352	0.03809	4.82863	1.41303	1	0.234554
OG0004945	0.25181	18	-6873.76	19	-6871.82	0.26133	0.1489	3.74397	3.89414	1	0.0484548
OG0004928	0.07476	18	-5811.3	19	-5811.3	0.07485	0.07316	7.25374	0.002578	1	0.959506
OG0004929	0.08416	18	-2821.97	19	-2821.63	0.08202	0.13709	4.21304	0.694838	1	0.404524
OG0004907	0.08894	18	-5642.66	19	-5641.57	0.08519	0.14378	6.23805	2.18887	1	0.139011
OG0004902	0.08437	18	-7398.7	19	-7398.57	0.08343	0.10586	4.56275	0.259032	1	0.610786
OG0004963	0.03165	18	-5122.69	19	-5122.31	0.03066	0.05556	3.31442	0.742282	1	0.388931
OG0004955	0.12329	18	-6934.63	19	-6934.61	0.12274	0.13135	2.58985	0.038604	1	0.844235
OG0004938	0.20409	18	-4761.42	19	-4755.32	0.17225	0.35763	1.8587	12.1956	1	0.000479011
OG0004933	0.07162	18	-2328.22	19	-2328.01	0.07411	0.04587	5.6389	0.408322	1	0.522822
OG0004915	0.02738	18	-4206.42	19	-4206.23	0.02848	0.01581	3.7542	0.368004	1	0.544094
OG0004901	0.10321	18	-7163.76	19	-7163.75	0.10294	0.1077	5.06714	0.018256	1	0.892521
OG0004949	0.12329	18	-6575.84	19	-6570.4	0.1311	0.03779	3.65856	10.8773	1	0.000973517
OG0004909	0.02321	18	-4556.89	19	-4555.14	0.02601	0.0001	3.99629	3.50731	1	0.0610987
OG0004958	0.17564	18	-3541.15	19	-3541.14	0.17626	0.15545	3.67175	0.019698	1	0.888384
OG0004954	0.12945	18	-4863.71	19	-4862.63	0.12364	0.22443	5.65221	2.1577	1	0.141857
OG0004931	0.07685	18	-9313.11	19	-9308.57	0.07267	0.16686	2.65907	9.07756	1	0.00258765
OG0004984	0.0326	18	-5572.59	19	-5571.59	0.03097	0.058	2.97011	2.01036	1	0.156228
OG0004950	0.01376	18	-5373.43	19	-5372.97	0.01329	0.03034	4.599	0.930598	1	0.334708
OG0004987	0.13398	18	-5495.33	19	-5494.31	0.13624	0.03752	3.94149	2.02183	1	0.155052
OG0004971	0.07414	18	-6952.94	19	-6947.83	0.08477	0.0001	4.01343	10.2159	1	0.00139236
OG0004994	0.17738	18	-1169.85	19	-1169.81	0.17454	0.21661	5.04947	0.081658	1	0.775063
OG0005027	0.13334	18	-2545.85	19	-2545.48	0.12781	0.18884	5.27892	0.753556	1	0.385353
OG0005017	0.09044	18	-1616.7	19	-1614.8	0.08187	0.30833	2.70857	3.81591	1	0.0507681
OG0005013	0.35421	18	-2198.81	19	-2196.85	0.37692	0.12126	2.64419	3.91646	1	0.0478154
OG0005001	0.04962	18	-2251.24	19	-2251.21	0.04917	0.06081	6.74709	0.06517	1	0.798504
OG0005024	0.15757	18	-2879.61	19	-2878.95	0.15081	0.24433	4.53553	1.33198	1	0.248453
OG0005022	0.01939	18	-2312.61	19	-2311.94	0.02067	0.0001	4.98282	1.34233	1	0.246623
OG0005039	0.07163	18	-1422.75	19	-1422.75	0.07189	0.06662	2.10957	0.00819	1	0.927891
OG0005015	0.01033	18	-1125.92	19	-1125.67	0.01123	0.0001	2.22421	0.487004	1	0.485267
OG0005006	0.09891	18	-1421.63	19	-1419.09	0.10758	0.0001	4.29146	5.07591	1	0.0242606
OG0005016	0.17488	18	-2035.96	19	-2031.66	0.1885	0.0001	2.65264	8.61595	1	0.00333232
OG0005004	0.04448	18	-2560.78	19	-2557.83	0.04777	0.0001	4.51322	5.89412	1	0.0151915
OG0005007	0.12053	18	-3869.35	19	-3865.9	0.11326	0.42886	3.61735	6.89902	1	0.00862429
OG0005028	0.33384	18	-4341.81	19	-4340	0.31647	0.60016	2.79046	3.63036	1	0.0567347
OG0005000	0.04633	18	-4079.96	19	-4075.95	0.05	0.0001	5.85977	8.0228	1	0.00461921
OG0005020	0.11963	18	-4225.86	19	-4225.7	0.11764	0.14774	5.0422	0.320654	1	0.571215
OG0005023	0.12734	18	-2865.23	19	-2865.06	0.12996	0.09251	6.41676	0.332376	1	0.564263
OG0004990	0.01677	18	-4288.71	19	-4288.71	0.01673	0.01721	2.63351	0.00074	1	0.978298
OG0004993	0.05441	18	-1893.82	19	-1890.83	0.03881	0.14935	3.64039	5.99355	1	0.0143583
OG0005010	0.04993	18	-3065.2	19	-3064.81	0.0519	0.02674	6.03216	0.777764	1	0.377826
OG0005005	0.02496	18	-2409.4	19	-2408.48	0.02644	0.0001	4.15311	1.83061	1	0.176056
OG0005003	0.08185	18	-4155.58	19	-4155.33	0.08329	0.0561	3.65451	0.502928	1	0.478216
OG0005033	0.11607	18	-3305.94	19	-3305.22	0.12102	0.06712	2.75282	1.43342	1	0.231207
OG0005037	0.08028	18	-1722.06	19	-1721.66	0.07354	0.14602	1.95842	0.794124	1	0.372856
OG0005030	0.20179	18	-3740.39	19	-3739.66	0.19412	0.2995	3.26564	1.45945	1	0.227018
OG0004952	0.07236	18	-7656.83	19	-7654.6	0.0775	0.02664	3.05072	4.45352	1	0.0348293
OG0005035	0.16943	18	-3916.14	19	-3915.09	0.17604	0.1003	2.4432	2.09456	1	0.147824
OG0004996	0.14402	18	-5519.02	19	-5518.93	0.1455	0.12462	4.21855	0.189552	1	0.66329
OG0005021	0.03771	18	-3591.7	19	-3591.34	0.03878	0.0174	4.61483	0.724094	1	0.394804
OG0005009	0.1274	18	-5325.95	19	-5325.23	0.13075	0.07502	3.78939	1.45703	1	0.227404
OG0005019	0.31577	18	-7684.32	19	-7683.66	0.30827	0.40746	3.95745	1.33336	1	0.248209
OG0005034	0.0996	18	-5320.58	19	-5320.44	0.10087	0.08099	4.79998	0.275684	1	0.599544
OG0005014	0.03696	18	-2795.56	19	-2795.17	0.0351	0.07794	3.44158	0.79217	1	0.373445
OG0005012	0.02264	18	-4402.36	19	-4402.17	0.02174	0.03159	3.40535	0.390488	1	0.532043
OG0005038	0.06202	18	-5799.79	19	-5799.54	0.06051	0.0825	4.66047	0.504004	1	0.477746
OG0005031	0.03625	18	-4243.81	19	-4241.02	0.03122	0.08761	5.2194	5.59682	1	0.0179931
OG0004995	0.02978	18	-3598.75	19	-3597.49	0.0321	0.0001	2.97999	2.51895	1	0.112485
OG0005029	0.21316	18	-5104.94	19	-5100.95	0.23028	0.07401	2.51226	7.98611	1	0.00471377
OG0004999	0.01127	18	-6035.06	19	-6032.32	0.01263	0.0001	2.03391	5.48423	1	0.0191887
OG0005042	0.19014	18	-4850.57	19	-4850.53	0.19159	0.17198	4.01925	0.08497	1	0.770672
OG0005036	0.08727	18	-4927.51	19	-4927.15	0.09037	0.057	6.94372	0.719404	1	0.396339
OG0005032	0.0744	18	-5188.84	19	-5187.27	0.07808	0.00266	2.92212	3.13858	1	0.0764604
OG0005043	0.01757	18	-3256.35	19	-3256.32	0.01787	0.01369	4.39065	0.067444	1	0.795095
OG0005057	0.04539	18	-1549.05	19	-1547.71	0.04819	0.0001	4.49968	2.66654	1	0.102479
OG0005059	0.01755	18	-2332.55	19	-2331.15	0.01555	0.05783	4.17014	2.79699	1	0.0944413
OG0005054	0.19215	18	-1726.8	19	-1726.71	0.18826	0.24682	2.54424	0.176672	1	0.674249
OG0005053	0.12878	18	-3596.93	19	-3596.89	0.12774	0.14778	3.88658	0.095068	1	0.75783
OG0005060	0.06329	18	-3390.41	19	-3389.99	0.06086	0.0936	5.17221	0.853302	1	0.35562
OG0005052	0.09104	18	-3653.67	19	-3651.07	0.08433	0.28125	4.28043	5.19945	1	0.0225941
OG0005046	0.03978	18	-4944.93	19	-4942.85	0.04155	0.0001	3.98994	4.16225	1	0.0413345
OG0005051	0.10652	18	-4348.23	19	-4347.22	0.10202	0.19509	3.90851	2.02486	1	0.154743
OG0005045	0.04631	18	-6710.42	19	-6709.17	0.04818	0.02024	5.2721	2.50886	1	0.113208
OG0005049	0.24351	18	-6759.51	19	-6758.07	0.2508	0.13535	4.61798	2.89487	1	0.0888621
OG0005048	0.14418	18	-6713.19	19	-6712.69	0.14789	0.1076	4.23538	0.992718	1	0.319079
OG0005056	0.06939	18	-6010.13	19	-6010.05	0.06853	0.08106	3.40855	0.153416	1	0.695292
OG0005063	0.086	18	-2499.93	19	-2499.52	0.08884	0.05334	3.18681	0.825892	1	0.363463
OG0005070	0.23487	18	-3872.21	19	-3871.51	0.24061	0.14537	2.42812	1.41568	1	0.234116
OG0005064	0.02755	18	-3808.43	19	-3808.11	0.02858	0.01635	6.38087	0.63318	1	0.426191
OG0005067	0.03825	18	-2635.19	19	-2632.94	0.04132	0.0001	2.27259	4.49795	1	0.0339356
OG0005061	0.04776	18	-3369.6	19	-3369.16	0.0492	0.02013	3.75893	0.883588	1	0.347221
OG0005066	0.07027	18	-5730.93	19	-5730.46	0.07214	0.04495	4.25216	0.943734	1	0.331319
OG0005072	0.07408	18	-5308.95	19	-5307.55	0.07025	0.12569	4.51812	2.80692	1	0.0938584
OG0005073	0.06849	18	-4300.12	19	-4299.03	0.07174	0.02876	5.08165	2.18796	1	0.139093
OG0005090	0.24527	18	-1573.95	19	-1573.52	0.23728	0.45653	2.05185	0.858186	1	0.354247
OG0005103	0.29412	18	-2840.79	19	-2840.58	0.30078	0.22895	4.01057	0.415364	1	0.519259
OG0005101	0.49854	18	-3287.46	19	-3285	0.4633	1.0865	1.82982	4.92877	1	0.0264131
OG0005107	0.14814	18	-3129.91	19	-3129.7	0.14541	0.19732	4.67534	0.423196	1	0.515347
OG0005100	0.27452	18	-2516.53	19	-2516.03	0.26356	0.40518	3.21695	1.00608	1	0.315845
OG0005094	0.22622	18	-2604.78	19	-2604.74	0.22377	0.25604	5.09996	0.086146	1	0.769135
OG0005104	0.28823	18	-3742.59	19	-3738.64	0.31074	0.05837	3.5037	7.88559	1	0.00498302
OG0005112	0.02102	18	-1797.15	19	-1797.09	0.02033	0.03015	4.01068	0.117038	1	0.732269
OG0005087	0.17409	18	-3418.14	19	-3417.99	0.17719	0.14094	4.10962	0.292048	1	0.588911
OG0005105	0.02694	18	-1851.1	19	-1851.04	0.02627	0.03488	3.84723	0.116316	1	0.733065
OG0005126	0.02806	18	-2042.69	19	-2042.69	0.02798	0.03021	2.11191	0.004844	1	0.944513
OG0005093	0.23946	18	-3761.87	19	-3761.03	0.24683	0.13236	4.03069	1.67948	1	0.194994
OG0005135	0.03453	18	-4053.18	19	-4053.07	0.03384	0.04461	5.77438	0.21713	1	0.641235
OG0005074	0.09849	18	-4396.89	19	-4396.89	0.09827	0.10294	4.32345	0.007236	1	0.93221
OG0005130	0.28428	18	-5152.66	19	-5152.44	0.27973	0.35555	3.01681	0.444342	1	0.505034
OG0005136	0.10127	18	-2223.05	19	-2219.04	0.11433	0.0001	3.61077	8.01736	1	0.00463312
OG0005123	0.02083	18	-1560.96	19	-1560.05	0.02202	0.0001	2.5405	1.82616	1	0.176582
OG0005144	0.02421	18	-3185.78	19	-3183.48	0.0257	0.0001	5.55799	4.6031	1	0.0319143
OG0005155	0.00815	18	-1786.52	19	-1785.49	0.00671	0.05514	3.46747	2.06345	1	0.150869
OG0005083	0.03308	18	-3910.6	19	-3908.75	0.03519	0.0001	4.40898	3.71457	1	0.0539394
OG0005076	0.04145	18	-4682.15	19	-4680.35	0.03869	0.14459	5.19474	3.59359	1	0.058003
OG0005113	0.01255	18	-5126.63	19	-5126.63	0.01263	0.01135	3.29357	0.010432	1	0.918648
OG0005131	0.18454	18	-3967.6	19	-3966.78	0.17939	0.37529	2.6535	1.62512	1	0.202379
OG0005080	0.16757	18	-3631.51	19	-3631.48	0.16848	0.15216	3.25024	0.049706	1	0.823576
OG0005119	0.02363	18	-4067.46	19	-4066.51	0.0254	0.0001	3.76489	1.89684	1	0.168433
OG0005133	0.02796	18	-2809.73	19	-2809.7	0.02839	0.0211	9.07681	0.06397	1	0.800328
OG0005116	0.03751	18	-2394.82	19	-2393.87	0.0405	0.01181	3.0645	1.8897	1	0.169236
OG0005077	0.08555	18	-4107.88	19	-4107.74	0.08705	0.07019	4.26082	0.286488	1	0.59248
OG0005082	0.44583	18	-2852.83	19	-2852.82	0.44552	0.45177	2.32237	0.000218	1	0.98822
OG0005092	0.03391	18	-4389.58	19	-4388.81	0.03534	0.01161	4.51956	1.54043	1	0.214553
OG0005124	0.15788	18	-4913.41	19	-4913.07	0.16143	0.11455	5.16709	0.677118	1	0.410581
OG0005086	0.00771	18	-3968.13	19	-3968.02	0.00837	0.00088	7.2962	0.235406	1	0.627544
OG0005111	0.32212	18	-6546.72	19	-6546.37	0.32775	0.25235	2.43003	0.684372	1	0.408085
OG0005089	0.08627	18	-7564.51	19	-7564.47	0.08574	0.09371	5.01135	0.07281	1	0.787289
OG0005146	0.03913	18	-3338.53	19	-3338.15	0.04033	0.02176	7.0157	0.766442	1	0.38132
OG0005099	0.16251	18	-6304.05	19	-6303.6	0.15907	0.20415	3.93508	0.895174	1	0.344079
OG0005128	0.04863	18	-2926.24	19	-2926.16	0.04992	0.03688	5.65363	0.163056	1	0.686358
OG0005084	0.03046	18	-3638.48	19	-3638.41	0.03081	0.02142	4.24693	0.1375	1	0.710779
OG0005156	0.04829	18	-2130.23	19	-2130.2	0.04762	0.06415	3.49087	0.06398	1	0.800313
OG0005081	0.1034	18	-6566.76	19	-6565.93	0.10575	0.06104	4.20894	1.66816	1	0.196505
OG0005108	0.08481	18	-6563.12	19	-6560.45	0.08823	0.0306	2.4875	5.34855	1	0.0207395
OG0005102	0.06403	18	-3757.93	19	-3756.38	0.06108	0.16494	5.44149	3.09339	1	0.0786111
OG0005153	0.06754	18	-3973.14	19	-3971.75	0.07049	0.02377	1.53624	2.79114	1	0.0947865
OG0005139	0.01291	18	-2756.83	19	-2756.8	0.01268	0.01647	5.76119	0.055088	1	0.814435
OG0005152	0.05606	18	-2954.65	19	-2947.83	0.04433	0.38202	3.47317	13.6317	1	0.000222404
OG0005137	0.04788	18	-4205.87	19	-4205.19	0.05022	0.02283	2.89299	1.36273	1	0.243066
OG0005148	0.13407	18	-5683.17	19	-5679.13	0.12564	0.31647	3.37473	8.08419	1	0.00446531
OG0005149	0.03202	18	-4151.62	19	-4150.36	0.03003	0.07606	4.25098	2.5067	1	0.113363
OG0005125	0.08248	18	-6441.95	19	-6439.95	0.07747	0.16711	5.98494	3.99695	1	0.0455827
OG0005088	0.3573	18	-7788.39	19	-7786.69	0.36955	0.21533	2.96016	3.41215	1	0.0647179
OG0005132	0.26568	18	-8014.38	19	-8014.06	0.26178	0.32579	3.28505	0.62963	1	0.427491
OG0005142	0.15678	18	-5150.81	19	-5147.73	0.14219	0.30685	4.05879	6.16173	1	0.0130543
OG0005118	0.01971	18	-4392.98	19	-4392.52	0.02059	0.00502	4.1121	0.921696	1	0.33703
OG0005138	0.27921	18	-10551.7	19	-10551.2	0.28395	0.22565	3.18636	1.11131	1	0.291797
OG0005091	0.01814	18	-6484.07	19	-6483.66	0.01697	0.03188	2.70139	0.817806	1	0.365822
OG0005106	0.04277	18	-6953.86	19	-6952.46	0.04432	0.01541	2.64193	2.80269	1	0.0941061
OG0005115	0.23794	18	-6099.92	19	-6099.69	0.23485	0.30609	4.0219	0.459952	1	0.497646
OG0005134	0.15585	18	-4510.13	19	-4509.58	0.1513	0.22852	4.16858	1.08826	1	0.296858
OG0005117	0.06721	18	-5827.74	19	-5825.57	0.07128	0.02686	3.1679	4.33242	1	0.037393
OG0005121	0.04944	18	-5339.71	19	-5339.37	0.05056	0.03486	3.72796	0.68407	1	0.408189
OG0005141	0.06567	18	-4748.83	19	-4746.79	0.06938	0.01343	4.26499	4.08512	1	0.0432624
OG0005143	0.18808	18	-7555.52	19	-7551.14	0.19465	0.04132	3.60501	8.7619	1	0.00307588
OG0005151	0.28427	18	-10073.3	19	-10071.5	0.29281	0.18306	3.00789	3.66323	1	0.0556256
OG0005150	0.06991	18	-4860.72	19	-4860.71	0.0695	0.07598	2.85335	0.011742	1	0.91371
OG0005164	0.33943	18	-1755.8	19	-1753.61	0.30547	1.30989	2.12257	4.38712	1	0.0362114
OG0005114	0.22791	18	-8451.62	19	-8446.7	0.2135	0.47537	5.55644	9.83183	1	0.00171518
OG0005163	0.03207	18	-2763.17	19	-2763.14	0.03153	0.03935	4.59574	0.074188	1	0.785334
OG0005178	0.24416	18	-2595.37	19	-2595.36	0.24316	0.25525	4.94896	0.011988	1	0.912814
OG0005202	0.01268	18	-1031.51	19	-1030.58	0.00994	0.07184	2.79434	1.84861	1	0.173945
OG0005162	0.13069	18	-2655.01	19	-2653.66	0.1385	0.05603	5.1781	2.68688	1	0.101178
OG0005160	0.29063	18	-5257.51	19	-5257.5	0.29178	0.27259	2.98853	0.033228	1	0.855359
OG0005203	0.05718	18	-1496.72	19	-1496.69	0.05644	0.06871	5.48244	0.052868	1	0.818146
OG0005193	0.03993	18	-2861.51	19	-2861.26	0.03894	0.0646	5.38023	0.499188	1	0.479857
OG0005169	0.02417	18	-2355.99	19	-2355.54	0.02245	0.05186	2.97754	0.8979	1	0.343345
OG0005167	0.10624	18	-1772.65	19	-1771.78	0.11303	0.03039	3.30687	1.738	1	0.187392
OG0005168	0.1839	18	-2875.49	19	-2873.01	0.17204	0.55085	4.42075	4.94464	1	0.0261717
OG0005181	0.13591	18	-2872.35	19	-2872.32	0.13465	0.14635	3.85099	0.051534	1	0.820415
OG0005161	0.09088	18	-2310.85	19	-2310.4	0.08753	0.1751	2.05344	0.913616	1	0.339157
OG0005177	0.03994	18	-2794.14	19	-2793.82	0.04113	0.01922	4.01	0.640796	1	0.423423
OG0005184	0.08297	18	-2619.63	19	-2618.77	0.07881	0.14509	2.50948	1.71371	1	0.190505
OG0005166	0.4142	18	-4944.88	19	-4944.74	0.40801	0.47488	4.59337	0.289322	1	0.590655
OG0005186	0.00952	18	-1593.73	19	-1593.44	0.00987	0.0001	7.18453	0.580948	1	0.445941
OG0005175	0.19895	18	-5124.88	19	-5124.74	0.19643	0.231	3.27045	0.280298	1	0.596506
OG0005174	0.06985	18	-5441.45	19	-5441.45	0.06985	0.06991	5.87054	6e-06	1	0.998046
OG0005180	0.09542	18	-3116.91	19	-3116.86	0.09655	0.08125	5.91506	0.099872	1	0.751983
OG0005165	0.01365	18	-4592.3	19	-4592.29	0.01357	0.01576	2.41438	0.01947	1	0.889027
OG0005196	0.06802	18	-4266.86	19	-4264.73	0.07211	0.02386	4.52849	4.24752	1	0.0393076
OG0005197	0.08479	18	-3475.26	19	-3474.78	0.08701	0.04849	5.31689	0.949158	1	0.329934
OG0005187	0.08749	18	-2459.31	19	-2457.51	0.09548	0.03702	3.90139	3.602	1	0.05771
OG0005192	0.06571	18	-2277.83	19	-2276.83	0.07204	0.0001	5.33234	2.00454	1	0.156829
OG0005204	0.07671	18	-3181.12	19	-3180.72	0.07332	0.12418	3.88213	0.798468	1	0.371552
OG0005201	0.05006	18	-4316.21	19	-4316.14	0.05054	0.03857	4.11709	0.124732	1	0.723958
OG0005205	0.12398	18	-4103.45	19	-4103.45	0.12402	0.12345	4.88268	9.6e-05	1	0.992182
OG0005170	0.1282	18	-5978.4	19	-5978.39	0.1287	0.12059	4.53867	0.028204	1	0.86663
OG0005200	0.04175	18	-4947.38	19	-4947.24	0.04239	0.03293	4.82793	0.26756	1	0.604973
OG0005176	0.13862	18	-8777.48	19	-8776.31	0.13515	0.20687	2.53096	2.33799	1	0.126252
OG0005206	0.03683	18	-5704.25	19	-5704.25	0.03681	0.03705	5.93685	0.000162	1	0.989845
OG0005158	0.31854	18	-8766.52	19	-8764.45	0.30424	0.51093	4.64679	4.13808	1	0.0419288
OG0005195	0.01195	18	-4108.98	19	-4107.82	0.01294	0.0001	3.43353	2.31785	1	0.127897
OG0005185	0.123	18	-4623.42	19	-4622.68	0.12972	0.06167	2.51075	1.47642	1	0.224336
OG0005188	0.03802	18	-4359.29	19	-4359.29	0.03672	0.04911	3.92942	0.014656	1	0.903642
OG0005191	0.03012	18	-6020.28	19	-6020.28	0.03002	0.03091	2.11536	0.004036	1	0.949345
OG0005222	0.0171	18	-1632.49	19	-1631.83	0.01513	0.07425		1.30899	1	0.252578
OG0005109	0.00877	18	-2386.4	19	-2386.36	0.00884	0.0001	3.51197	0.082016	1	0.774584
OG0005207	0.0901	18	-4163.23	19	-4161.87	0.09373	0.04012	3.54749	2.70946	1	0.0997545
OG0005157	0.04191	18	-5540.21	19	-5539.82	0.04373	0.02767	2.94719	0.768856	1	0.380571
OG0005110	0.05225	18	-4399.79	19	-4399.69	0.05168	0.06727	4.53035	0.197384	1	0.656841
OG0005221	0.04467	18	-2673.73	19	-2672.21	0.04832	0.0001	3.28775	3.04476	1	0.0809981
OG0005215	0.16707	18	-4907.99	19	-4907.51	0.16307	0.23529	2.96389	0.957306	1	0.327867
OG0005232	0.08313	18	-3607.56	19	-3605.11	0.08856	0.0001	3.47604	4.90138	1	0.0268353
OG0005216	0.14303	18	-3836.31	19	-3836.07	0.13876	0.19375	2.44227	0.483458	1	0.48686
OG0005210	0.06998	18	-3998.64	19	-3998.37	0.068	0.09089	5.16089	0.527512	1	0.467655
OG0005231	0.01646	18	-2595.19	19	-2593.46	0.01407	0.04909	4.73696	3.44563	1	0.0634193
OG0005224	0.04502	18	-3852.5	19	-3852.16	0.04608	0.02505	3.65677	0.6829	1	0.40859
OG0005209	0.15291	18	-4214.57	19	-4212.88	0.14314	0.25988	6.84612	3.3904	1	0.065577
OG0005211	0.19863	18	-6483.97	19	-6481.79	0.20549	0.08168	3.86055	4.36669	1	0.0366481
OG0005230	0.16018	18	-3788.1	19	-3787.18	0.1664	0.07195	2.83285	1.84684	1	0.174151
OG0005227	0.03331	18	-6796.33	19	-6796.33	0.03342	0.03123	5.14286	0.015796	1	0.899984
OG0005239	0.05187	18	-1991.95	19	-1991.93	0.05142	0.06128	4.51402	0.044402	1	0.833107
OG0005245	0.03482	18	-1939.31	19	-1938.81	0.03701	0.01466	4.58233	0.989692	1	0.319818
OG0005229	0.0332	18	-3855.56	19	-3853.67	0.03501	0.0001	7.38937	3.77504	1	0.0520227
OG0005228	0.11401	18	-3182.84	19	-3182.75	0.1125	0.14021	3.76142	0.180176	1	0.671222
OG0005248	0.09422	18	-5340.89	19	-5339.11	0.0906	0.18258	3.48627	3.56173	1	0.0591259
OG0005234	0.0086	18	-1326.86	19	-1326.76	0.00903	0.0001		0.190044	1	0.66288
OG0005246	0.05506	18	-3921.52	19	-3921.07	0.05285	0.08398	5.68017	0.900848	1	0.342554
OG0005244	0.07289	18	-6262.29	19	-6259.88	0.06839	0.17639	3.63467	4.82369	1	0.0280712
OG0005235	0.13628	18	-6084.69	19	-6084.22	0.13327	0.18343	2.99095	0.94264	1	0.3316
OG0005233	0.03221	18	-2932.14	19	-2932.14	0.03196	0.0348	4.29125	0.011438	1	0.91483
OG0005242	0.35399	18	-9268.66	19	-9268.56	0.35683	0.31967	5.54624	0.19639	1	0.657651
OG0005250	0.06506	18	-3360.97	19	-3359.72	0.07097	0.0001	5.60378	2.50016	1	0.113835
OG0005303	0.20352	18	-1660.4	19	-1659.14	0.19193	0.51823	2.98468	2.5033	1	0.113608
OG0005284	0.30483	18	-1604.55	19	-1603.37	0.28243	0.60734	3.08212	2.3668	1	0.123941
OG0005259	0.06705	18	-2453.12	19	-2453.11	0.06731	0.06295	4.93103	0.009578	1	0.922038
OG0005272	0.04305	18	-1464.79	19	-1464.66	0.04479	0.02416	4.4781	0.257372	1	0.611931
OG0005319	0.22765	18	-2706.96	19	-2706.77	0.23237	0.16922	3.90023	0.37891	1	0.538187
OG0005267	0.06652	18	-1150.51	19	-1149.73	0.05731	0.3834	3.42209	1.56698	1	0.210646
OG0005302	0.04762	18	-3132.82	19	-3131.52	0.0508	0.01359	4.16332	2.59388	1	0.107278
OG0005251	0.06213	18	-3264.7	19	-3264.7	0.06237	0.05934	6.13052	0.007396	1	0.931466
OG0005299	0.14757	18	-3598.57	19	-3598.26	0.15126	0.09736	2.99111	0.627924	1	0.428118
OG0005313	0.02316	18	-1593.92	19	-1593.7	0.02196	0.04962	4.10937	0.437234	1	0.508461
OG0005276	0.0087	18	-1974.93	19	-1974.87	0.00978	0.0001	3.71412	0.123016	1	0.725786
OG0005281	0.19635	18	-2965.92	19	-2965.68	0.19169	0.26383	3.65956	0.484004	1	0.486614
OG0005315	0.05281	18	-5268.41	19	-5267.33	0.05499	0.02077	6.03393	2.15228	1	0.142358
OG0005280	0.01766	18	-1738.64	19	-1738.62	0.0174	0.02255	4.05275	0.053752	1	0.816659
OG0005252	0.17513	18	-3628.97	19	-3628.75	0.17183	0.23691	4.11746	0.45258	1	0.501112
OG0005306	0.03168	18	-3769.3	19	-3769.23	0.03112	0.03814	5.51077	0.148952	1	0.699539
OG0005298	0.08017	18	-3545	19	-3544.96	0.07912	0.08881	1.96546	0.08543	1	0.770069
OG0005282	0.06949	18	-3517.24	19	-3516.95	0.07125	0.04861	4.97005	0.583898	1	0.444788
OG0005300	0.09998	18	-4232.43	19	-4232.28	0.10143	0.07935	5.65444	0.293876	1	0.587747
OG0005253	0.034	18	-3182.06	19	-3181.76	0.03205	0.0619	4.60963	0.585142	1	0.444304
OG0005307	0.14681	18	-5842.71	19	-5842.61	0.14538	0.16707	4.92136	0.192072	1	0.661198
OG0005258	0.22488	18	-5378.68	19	-5377.93	0.21873	0.3411	2.83498	1.49662	1	0.221192
OG0005268	0.14443	18	-3405.06	19	-3402.83	0.12472	0.35532	3.11748	4.45355	1	0.0348288
OG0005265	0.08673	18	-2068.78	19	-2067.97	0.08369	0.46611	2.53625	1.61553	1	0.203716
OG0005317	0.09903	18	-5817.66	19	-5817.64	0.0995	0.09123	2.4328	0.046604	1	0.829082
OG0005286	0.06717	18	-3695.15	19	-3694.92	0.06841	0.04697	4.51021	0.456648	1	0.499195
OG0005305	0.03688	18	-3434.67	19	-3434.57	0.03767	0.02528	4.37589	0.183514	1	0.668371
OG0005263	0.06694	18	-2620.97	19	-2620.85	0.06562	0.09271	7.05635	0.236322	1	0.626875
OG0005316	0.05812	18	-4301.8	19	-4301.41	0.05927	0.02596	3.05728	0.7895	1	0.374251
OG0005279	0.02072	18	-2717.47	19	-2717.32	0.02012	0.03177	8.10361	0.30307	1	0.581964
OG0005318	0.10751	18	-4385.07	19	-4384.94	0.10884	0.08292	4.675	0.246066	1	0.619859
OG0005314	0.04119	18	-4176.79	19	-4176.79	0.04124	0.04057	6.21443	0.000838	1	0.976906
OG0005277	0.38929	18	-9044.94	19	-9044.33	0.38206	0.51162	3.45748	1.21343	1	0.270653
OG0005290	0.00113	18	-1685.48	19	-1685.44	0.00113	0.0001	3.93638	0.092942	1	0.76047
OG0005287	0.20029	18	-5846.68	19	-5846.65	0.20119	0.18591	2.69051	0.048334	1	0.825988
OG0005270	0.05591	18	-3402.83	19	-3402.25	0.05356	0.11918	2.53831	1.17459	1	0.27846
OG0005310	0.10589	18	-3991.74	19	-3991.53	0.10755	0.07271	4.50505	0.412904	1	0.520499
OG0005312	0.03658	18	-4360.11	19	-4359.94	0.03739	0.02135	3.52774	0.331458	1	0.564802
OG0005304	0.08115	18	-6102.52	19	-6102.49	0.08057	0.08888	7.28993	0.060808	1	0.805223
OG0005311	0.03816	18	-4884.97	19	-4884.97	0.03824	0.037	5.30166	0.003534	1	0.952596
OG0005291	0.03044	18	-3795.7	19	-3793.46	0.03228	0.0001	5.67216	4.47676	1	0.0343589
OG0005289	0.01128	18	-3056.5	19	-3056.41	0.01144	0.0001	4.79983	0.181788	1	0.669841
OG0005283	0.08011	18	-6165.89	19	-6164.82	0.07696	0.13252	5.45822	2.12364	1	0.145042
OG0005269	0.02861	18	-6238.24	19	-6238.23	0.02858	0.02914	2.51376	0.00086	1	0.976605
OG0005292	0.07263	18	-7456.8	19	-7456.08	0.07456	0.04155	3.0564	1.4403	1	0.230091
OG0005308	0.10139	18	-5453.78	19	-5452.6	0.09775	0.18851	4.99307	2.34515	1	0.125673
OG0005320	0.03898	18	-6496.61	19	-6496.61	0.03895	0.03972	6.39479	0.001354	1	0.970647
OG0005274	0.02605	18	-6541.91	19	-6540.02	0.02745	0.00584	5.25436	3.7901	1	0.0515564
OG0005332	0.0783	18	-1259.86	19	-1258.88	0.08127	0.0001	2.28125	1.9576	1	0.16177
OG0005262	0.12902	18	-7638.79	19	-7638.75	0.12796	0.13959	4.18945	0.090302	1	0.763794
OG0005293	0.08776	18	-7554.45	19	-7553.47	0.08459	0.13862	3.46012	1.96934	1	0.160518
OG0005348	0.02384	18	-1597.28	19	-1597.09	0.02481	0.0001	4.03399	0.385764	1	0.534534
OG0005334	0.08102	18	-2354.76	19	-2354.75	0.08182	0.07371	4.8278	0.030106	1	0.86225
OG0005340	0.05807	18	-2255.11	19	-2254.6	0.05553	0.10078	3.40938	1.01777	1	0.313049
OG0005341	0.18707	18	-2964.37	19	-2962.84	0.17622	0.38688	5.11758	3.07425	1	0.0795413
OG0005339	0.13491	18	-3912.16	19	-3912.1	0.13353	0.15404	4.79666	0.126196	1	0.722409
OG0005352	0.16963	18	-3083.08	19	-3081.34	0.17302	0.0001	3.2095	3.48193	1	0.0620423
OG0005329	0.10924	18	-4855.53	19	-4855.39	0.10769	0.12989	5.49252	0.273878	1	0.600742
OG0005328	0.01286	18	-3385.19	19	-3384.17	0.01361	0.0001	7.59839	2.03958	1	0.153252
OG0005322	0.11628	18	-4978.29	19	-4978.01	0.11848	0.08154	3.27142	0.565064	1	0.452227
OG0005358	0.29716	18	-4645.6	19	-4644.58	0.30826	0.17765	5.32441	2.02555	1	0.154673
OG0005349	0.10516	18	-2950.16	19	-2949.8	0.10143	0.14759	3.98501	0.719946	1	0.396162
OG0005353	0.02037	18	-6754.68	19	-6754.67	0.02041	0.01904	2.1048	0.00889	1	0.924881
OG0005354	0.00992	18	-2830.79	19	-2830.33	0.0109	0.0001	3.81201	0.9102	1	0.340061
OG0005321	0.04575	18	-4180.39	19	-4179.66	0.04747	0.01973	5.41169	1.4639	1	0.226311
OG0005344	0.14711	18	-5276.41	19	-5276.07	0.14364	0.1937	3.99261	0.682004	1	0.408898
OG0005343	0.16287	18	-9629.91	19	-9629.17	0.16571	0.11565	3.27089	1.46847	1	0.225587
OG0005324	0.01741	18	-3061.21	19	-3049.45	0.01205	0.24593	2.51521	23.5362	1	1.226e-06
OG0005351	0.03519	18	-3995.72	19	-3993.79	0.03763	0.0001	2.47518	3.84768	1	0.049815
OG0005326	0.22831	18	-7566.24	19	-7565.42	0.23432	0.16087	4.30693	1.6359	1	0.200889
OG0005347	0.06459	18	-5615.37	19	-5613.4	0.06142	0.13903	2.98563	3.9341	1	0.0473165
OG0005346	0.11205	18	-4180.44	19	-4178.82	0.1048	0.24944	4.78397	3.23337	1	0.0721521
OG0005355	0.04862	18	-5417.28	19	-5416.6	0.0504	0.02291	5.37924	1.36091	1	0.243379
OG0005350	0.09019	18	-5322.75	19	-5322.18	0.0872	0.13863	2.9638	1.13464	1	0.286788
OG0005359	0.27274	18	-4144.11	19	-4143.11	0.26243	0.42716	3.22994	1.99001	1	0.15834
OG0005376	0.38378	18	-2020.72	19	-2019.5	0.40232	0.14673	3.00743	2.44525	1	0.117881
OG0005377	0.17788	18	-1819.47	19	-1819.47	0.17764	0.18109	3.46448	0.000992	1	0.974874
OG0005362	0.8086	18	-2226.8	19	-2225.69	0.74081	1.46973	2.9129	2.2154	1	0.136639
OG0005379	0.066	18	-963.352	19	-963.352	0.066	1.00993	5.59805	-5.8e-05	1	invalid
OG0005366	0.01049	18	-941.151	19	-938.715	0.0001	0.14794	4.34865	4.87341	1	0.0272736
OG0005378	0.12112	18	-2771.89	19	-2771.72	0.12345	0.09211	5.73184	0.346232	1	0.556254
OG0005381	0.12471	18	-2457.49	19	-2457.21	0.12125	0.17371	5.01155	0.57022	1	0.450172
OG0005367	0.19163	18	-2172.67	19	-2172.66	0.19058	0.20549	4.87618	0.020482	1	0.886199
OG0005361	0.17905	18	-3601.62	19	-3596.97	0.19235	0.03859	2.60336	9.30966	1	0.00227949
OG0005387	0.02955	18	-2710.44	19	-2710.4	0.02914	0.03729	2.37005	0.09564	1	0.757126
OG0005368	0.03497	18	-3323.68	19	-3323.41	0.03575	0.01773	3.99538	0.531842	1	0.465833
OG0005365	0.17535	18	-4619.51	19	-4617.96	0.16641	0.29138	4.91786	3.10468	1	0.0780677
OG0005384	0.07955	18	-2629.43	19	-2627.04	0.08595	0.01462	3.23532	4.77865	1	0.0288147
OG0005369	0.19218	18	-4288.05	19	-4281.63	0.20579	0.0251	2.71223	12.849	1	0.000337657
OG0005370	0.10516	18	-3639.86	19	-3639.06	0.10892	0.05139	3.77367	1.58757	1	0.207674
OG0005364	0.1095	18	-4543.38	19	-4542.73	0.11265	0.0671	4.81109	1.31419	1	0.251638
OG0005360	0.03414	18	-2287.01	19	-2286.75	0.03541	0.01763	2.66237	0.52032	1	0.470705
OG0005363	0.10081	18	-6097.68	19	-6097.45	0.09931	0.12271	3.19921	0.471272	1	0.492403
OG0005385	0.04544	18	-4711.22	19	-4710.95	0.0442	0.06866	4.51955	0.546106	1	0.459913
OG0005380	0.06383	18	-5858.37	19	-5857.3	0.06143	0.1081	3.98115	2.15292	1	0.142299
OG0005382	0.10581	18	-6600.18	19	-6599.62	0.10776	0.06646	2.29714	1.12559	1	0.288718
OG0005389	0.08028	18	-1930.49	19	-1929.81	0.08423	0.04105	4.28417	1.36424	1	0.242804
OG0005405	0.05893	18	-2379.69	19	-2379.43	0.05725	0.09049	5.09671	0.529804	1	0.466689
OG0005409	0.3189	18	-3573.08	19	-3572.35	0.3273	0.18723	4.44024	1.45784	1	0.227274
OG0005396	0.06196	18	-1855.82	19	-1855.75	0.06289	0.04336	2.6672	0.128256	1	0.720247
OG0005393	0.15346	18	-2117.27	19	-2115.48	0.16441	0.04356	3.89571	3.57439	1	0.0586771
OG0005398	0.06891	18	-2078.14	19	-2078.11	0.06841	0.08615	4.56278	0.06283	1	0.802078
OG0005406	0.14833	18	-2651.46	19	-2651.45	0.14742	0.16233	3.05253	0.0202	1	0.88698
OG0005390	0.04502	18	-4478	19	-4477.98	0.04542	0.04024	5.86452	0.057332	1	0.810764
OG0005402	0.12505	18	-3923.78	19	-3923.63	0.12286	0.15537	5.62891	0.296612	1	0.586014
OG0005408	0.0776	18	-3550.1	19	-3549.98	0.079	0.06	1.81678	0.232686	1	0.629539
OG0005388	0.02395	18	-3691.39	19	-3690.56	0.02203	0.05639	2.89064	1.65855	1	0.197799
OG0005395	0.04593	18	-4088.92	19	-4087.54	0.04905	0.0001	4.18462	2.75169	1	0.0971519
OG0005401	0.22228	18	-5675.2	19	-5674.33	0.21504	0.32579	4.51325	1.73892	1	0.187276
OG0005427	0.0164	18	-823.597	19	-823.233	0.01771	0.0001	4.27285	0.729702	1	0.39298
OG0005429	0.04508	18	-1240.68	19	-1240.17	0.04215	0.09219	1.80038	1.01641	1	0.313372
OG0005413	0.09305	18	-1941.45	19	-1941.27	0.09549	0.06714	4.3476	0.360916	1	0.547998
OG0005462	0.07958	18	-1770.85	19	-1770.85	0.07973	0.07818	3.61974	0.001026	1	0.974447
OG0005445	0.0868	18	-1653.49	19	-1653.24	0.08423	0.16523	3.38952	0.503734	1	0.477864
OG0005458	0.13679	18	-1522.79	19	-1522.79	0.1365	0.14177	3.08957	0.002614	1	0.959224
OG0005470	0.03968	18	-1673.16	19	-1673.11	0.04084	0.03195	4.71028	0.101378	1	0.750182
OG0005478	0.28692	18	-6644.32	19	-6644.22	0.28948	0.257	2.95762	0.202482	1	0.652725
OG0005475	0.07494	18	-2549.6	19	-2549.36	0.07713	0.05023	3.58983	0.469968	1	0.493002
OG0005433	0.04042	18	-2311.88	19	-2311.88	0.04033	0.04218	5.03777	0.002784	1	0.95792
OG0005430	0.15355	18	-2046.46	19	-2043.95	0.12714	0.46921	4.68985	5.03736	1	0.0248063
OG0005415	0.04148	18	-1890.06	19	-1882.83	0.02477	0.42948	2.88741	14.459	1	0.000143247
OG0005466	0.06417	18	-1953.57	19	-1952.71	0.06174	0.24628	5.20948	1.71878	1	0.18985
OG0005465	0.14282	18	-2258.46	19	-2257.56	0.13659	0.33285	4.77032	1.80397	1	0.179233
OG0005450	0.2068	18	-3815.43	19	-3812.57	0.22027	0.0787	5.28344	5.73232	1	0.0166555
OG0005428	0.1203	18	-2304.23	19	-2304.07	0.11802	0.16663	5.46886	0.316436	1	0.573757
OG0005468	0.09575	18	-2812.58	19	-2812.06	0.09849	0.03735	3.76114	1.03387	1	0.309251
OG0005440	0.00923	18	-2556.22	19	-2555.39	0.01001	0.0001	4.62319	1.66257	1	0.197257
OG0005434	0.12987	18	-3308.6	19	-3308.6	0.1295	0.13628	3.99002	0.006448	1	0.935999
OG0005438	0.00974	18	-3125.54	19	-3125.31	0.00925	0.02077	5.77821	0.45482	1	0.500055
OG0005479	0.1022	18	-3604.7	19	-3602.96	0.10736	0.04131	3.94639	3.47991	1	0.0621183
OG0005474	0.24766	18	-5202.35	19	-5202.25	0.25028	0.21457	3.6215	0.199094	1	0.655453
OG0005414	0.06766	18	-3789.89	19	-3789.26	0.06479	0.11081	5.60624	1.26708	1	0.260316
OG0005423	0.11291	18	-5016.42	19	-5016.31	0.11383	0.0906	3.73987	0.21427	1	0.643441
OG0005476	0.18122	18	-4803.46	19	-4803.44	0.18213	0.17145	2.88696	0.03671	1	0.848057
OG0005422	0.01995	18	-4351.44	19	-4349.87	0.02135	0.0001	2.73193	3.12172	1	0.077255
OG0005443	0.24136	18	-4440.03	19	-4439.36	0.24812	0.15855	4.08443	1.34769	1	0.245683
OG0005412	0.17246	18	-5651.48	19	-5650.99	0.17637	0.12886	4.09122	0.97477	1	0.323493
OG0005452	0.09708	18	-3436.37	19	-3436.35	0.09638	0.10698	3.63044	0.043916	1	0.83401
OG0005457	0.35761	18	-8093.97	19	-8093.44	0.36404	0.28219	4.00462	1.07466	1	0.299895
OG0005419	0.02012	18	-3896.6	19	-3896.53	0.02058	0.0157	4.76645	0.132796	1	0.71555
OG0005432	0.02281	18	-4301.58	19	-4300.49	0.02045	0.05302	9.25513	2.18591	1	0.139279
OG0005449	0.25184	18	-7492.31	19	-7490.11	0.24027	0.41343	4.47261	4.40191	1	0.0358987
OG0005436	0.20196	18	-3964.15	19	-3963.47	0.20719	0.06814	4.53021	1.36598	1	0.242504
OG0005424	0.11595	18	-5915.25	19	-5914.99	0.11424	0.14788	3.97863	0.52337	1	0.469408
OG0005467	0.06371	18	-7556.76	19	-7556.62	0.06455	0.05044	4.07981	0.286912	1	0.592206
OG0005464	0.0965	18	-5534.63	19	-5534.63	0.09661	0.09461	2.98432	0.002916	1	0.956935
OG0005472	0.02404	18	-5436.12	19	-5435.84	0.02274	0.03568	2.29187	0.56423	1	0.452561
OG0005448	0.04358	18	-3147.57	19	-3146.11	0.04639	0.0001	5.79241	2.93381	1	0.0867423
OG0005418	0.22731	18	-5974.17	19	-5974.08	0.22483	0.25289	4.23469	0.184642	1	0.667414
OG0005442	0.10099	18	-7543.34	19	-7542.71	0.10277	0.06726	2.03357	1.25707	1	0.262207
OG0005435	0.06016	18	-6883.05	19	-6882.54	0.06179	0.03698	3.9429	1.02854	1	0.310501
OG0005451	0.21185	18	-4589.36	19	-4588.82	0.20564	0.31659	5.3524	1.08975	1	0.296526
OG0005416	0.0946	18	-8125.17	19	-8123.1	0.09823	0.05366	2.52473	4.13327	1	0.042048
OG0005460	0.01632	18	-5767.15	19	-5767.12	0.01645	0.01399	4.83514	0.049004	1	0.824806
OG0005484	0.11934	18	-2849.7	19	-2849.08	0.11661	0.24459	2.81569	1.23506	1	0.266424
OG0005482	0.09858	18	-982.947	19	-982.341	0.09082	0.22782	4.69984	1.21173	1	0.270991
OG0005461	0.11232	18	-9055.02	19	-9053.25	0.11646	0.06553	3.34232	3.54208	1	0.0598302
OG0005497	0.37186	18	-4065.11	19	-4063.64	0.38945	0.21215	3.48047	2.93219	1	0.0868294
OG0005487	0.21849	18	-4777.35	19	-4777.18	0.21526	0.2582	4.23914	0.32511	1	0.568553
OG0005505	0.07764	18	-3449.87	19	-3449.7	0.07895	0.05852	4.60597	0.352724	1	0.552575
OG0005485	0.02634	18	-3452.63	19	-3451.46	0.02821	0.0001	2.68883	2.33856	1	0.126206
OG0005488	0.16187	18	-3110.38	19	-3109.08	0.17084	0.08362	3.30689	2.6113	1	0.106105
OG0005503	0.05089	18	-4416.4	19	-4416.4	0.05103	0.04867	3.11474	0.009186	1	0.923645
OG0005501	0.09045	18	-2915	19	-2912.92	0.10025	0.01887	4.05769	4.1449	1	0.04176
OG0005480	0.08785	18	-2033.25	19	-2033.22	0.08833	0.06596	4.63416	0.068912	1	0.792928
OG0005508	0.12165	18	-2834.01	19	-2834	0.12213	0.10945	2.57625	0.023644	1	0.877794
OG0005499	0.03711	18	-3375.29	19	-3374.82	0.03953	0.02001	2.88715	0.945698	1	0.330817
OG0005513	0.04499	18	-3267.9	19	-3267.6	0.04649	0.02659	7.72884	0.595674	1	0.440233
OG0005509	0.0811	18	-3930.49	19	-3929.96	0.08473	0.0443	4.69404	1.05613	1	0.304099
OG0005498	0.05573	18	-2872.8	19	-2869.88	0.05905	0.0001	3.64439	5.84076	1	0.015659
OG0005483	0.09515	18	-5044.15	19	-5043	0.09959	0.05329	4.06698	2.29196	1	0.130045
OG0005514	0.03223	18	-3773.38	19	-3773.35	0.03264	0.02509	6.11983	0.064912	1	0.798894
OG0005490	0.05693	18	-5298.86	19	-5296.17	0.0601	0.01478	2.97146	5.37087	1	0.0204757
OG0005447	0.15553	18	-8712.5	19	-8712.32	0.15734	0.12518	4.23379	0.376216	1	0.539635
OG0005502	0.04598	18	-3845.33	19	-3844.47	0.0483	0.01516	2.2815	1.72506	1	0.189043
OG0005491	0.03708	18	-3561.36	19	-3559.66	0.04048	0.00892	2.5673	3.40011	1	0.065192
OG0005493	0.08121	18	-7676.89	19	-7676.33	0.08294	0.05286	2.92412	1.1181	1	0.290328
OG0005512	0.02272	18	-4698.05	19	-4697.67	0.02198	0.06725	2.6927	0.760624	1	0.383133
OG0005481	0.06007	18	-7253.57	19	-7253.33	0.0611	0.04789	3.92672	0.479394	1	0.488697
OG0005495	0.13826	18	-8044.35	19	-8044.29	0.13903	0.12364	2.66702	0.1277	1	0.720829
OG0005489	0.16042	18	-10880.9	19	-10880.6	0.16261	0.13638	2.97163	0.601236	1	0.438107
OG0005515	0.1834	18	-1915.09	19	-1915.08	0.18401	0.16462	1.70802	0.013342	1	0.908043
OG0005492	0.14105	18	-6248.27	19	-6247.76	0.1441	0.1004	3.67017	1.01861	1	0.312849
OG0005516	0.0337	18	-2621.14	19	-2620.11	0.03516	0.0001	5.14929	2.06486	1	0.150729
OG0005524	0.06014	18	-2142.22	19	-2141.88	0.0578	0.09483	2.89974	0.693564	1	0.404955
OG0005521	0.01184	18	-2080.11	19	-2078.58	0.00963	0.05563	8.76748	3.05681	1	0.0803994
OG0005530	0.23481	18	-4830.2	19	-4828.89	0.22508	0.37895	4.21896	2.63127	1	0.104778
OG0005525	0.0836	18	-3296.82	19	-3296.7	0.0849	0.06592	2.03801	0.240836	1	0.623603
OG0005528	0.16525	18	-6544.89	19	-6542.73	0.17147	0.07627	4.39605	4.31953	1	0.0376774
OG0005538	0.25324	18	-3861.88	19	-3859.93	0.26775	0.12162	4.73981	3.90082	1	0.0482625
OG0005529	0.0134	18	-4748.29	19	-4748.29	0.01345	0.01228	4.60135	0.00761	1	0.930484
OG0005533	0.0535	18	-4272.23	19	-4267.5	0.048	0.15239	3.34358	9.47034	1	0.0020882
OG0005537	0.05579	18	-5263.16	19	-5263.16	0.05583	0.05505	3.44229	0.001026	1	0.974447
OG0005523	0.08553	18	-5249.04	19	-5247.63	0.08104	0.14846	3.25514	2.82383	1	0.0928746
OG0005536	0.02197	18	-4713.55	19	-4713.54	0.02208	0.01949	3.6212	0.027728	1	0.86775
OG0005518	0.07986	18	-5027.78	19	-5027.75	0.07925	0.08938	4.71567	0.076144	1	0.782593
OG0005527	0.10845	18	-8264.83	19	-8255.31	0.11436	0.00689	4.01931	19.0305	1	1.2864e-05
OG0005535	0.03914	18	-2930.52	19	-2930.09	0.0399	0.0001	1.81327	0.851012	1	0.356266
OG0005531	0.31387	18	-9291.1	19	-9290.39	0.30755	0.44478	3.59736	1.42119	1	0.233208
OG0005541	0.18282	18	-2184.15	19	-2183.64	0.18773	0.0936	3.50695	1.02633	1	0.311022
OG0005542	0.03572	18	-3604.45	19	-3604.44	0.03545	0.03874	5.98111	0.023874	1	0.877206
OG0005553	0.09697	18	-3562.03	19	-3561.44	0.10074	0.06146	4.66606	1.18551	1	0.276237
OG0005548	0.17544	18	-2825.94	19	-2825.94	0.17639	0.16356	3.14715	0.012754	1	0.910083
OG0005545	0.06911	18	-5849.68	19	-5849.23	0.06743	0.10044	2.58827	0.896248	1	0.34379
OG0005555	0.06037	18	-3220.32	19	-3217.96	0.06509	0.0001	2.54477	4.72805	1	0.0296745
OG0005552	0.02463	18	-4348.66	19	-4348.64	0.02449	0.02737	4.85568	0.029486	1	0.863662
OG0005554	0.03533	18	-3366.36	19	-3366	0.03372	0.05417	5.04646	0.73565	1	0.391058
OG0005543	0.10958	18	-6807.95	19	-6807.81	0.10856	0.13254	3.63606	0.271708	1	0.602188
OG0005549	0.0364	18	-6134.17	19	-6132.1	0.03758	0.0001	3.51973	4.13836	1	0.0419219
OG0005571	0.00865	18	-1303.74	19	-1303.52	0.00968	0.0001	2.94406	0.435798	1	0.509158
OG0005578	0.14913	18	-996.266	19	-996.261	0.14997	0.13933	4.34655	0.009554	1	0.922135
OG0005591	0.0621	18	-1690.61	19	-1688.53	0.06593	0.0001	4.51885	4.16261	1	0.0413257
OG0005587	0.0911	18	-1703.71	19	-1703.66	0.09224	0.07464	3.52655	0.093552	1	0.759709
OG0005605	0.12556	18	-1831.97	19	-1829.98	0.13491	0.02434	4.65383	3.97335	1	0.0462258
OG0005551	0.05454	18	-5916.77	19	-5915.4	0.05212	0.10023	3.7971	2.74346	1	0.0976529
OG0005572	0.33869	18	-3856.18	19	-3856.13	0.34135	0.30087	2.88574	0.097268	1	0.755133
OG0005565	0.46295	18	-1981.63	19	-1981.54	0.47141	0.36657	2.10601	0.198038	1	0.656309
OG0005595	0.00777	18	-2301.78	19	-2301.34	0.00638	0.02216	4.46584	0.884884	1	0.346867
OG0005604	0.32773	18	-3406.12	19	-3401.06	0.29624	0.99551	3.03369	10.1102	1	0.00147452
OG0005561	0.01257	18	-2977.84	19	-2977.38	0.01325	0.0001	2.9684	0.918208	1	0.337946
OG0005576	0.0872	18	-4378.53	19	-4378.04	0.08983	0.05292	3.51397	0.985742	1	0.320785
OG0005559	0.13101	18	-1791.5	19	-1791.36	0.12781	0.18537	5.68047	0.278302	1	0.597816
OG0005557	0.06528	18	-2988.35	19	-2988.21	0.06407	0.09031	7.75529	0.287806	1	0.59163
OG0005597	0.30514	18	-2407.92	19	-2407.66	0.31438	0.21532	3.00888	0.520474	1	0.47064
OG0005596	0.05158	18	-2323.1	19	-2321.91	0.04755	0.1135	3.27296	2.37774	1	0.123075
OG0005560	0.08434	18	-4978.91	19	-4978.74	0.08554	0.06629	4.48122	0.349678	1	0.554295
OG0005603	0.0258	18	-2264.56	19	-2263.3	0.02807	0.0001	5.92156	2.5276	1	0.111871
OG0005580	0.05024	18	-1716.35	19	-1715.24	0.05283	0.0001	4.18434	2.2375	1	0.134699
OG0005573	0.06583	18	-5124.54	19	-5122.2	0.06941	0.0177	2.84597	4.66296	1	0.0308201
OG0005583	0.0273	18	-2557.63	19	-2555.26	0.01897	0.2177	8.35331	4.72765	1	0.0296814
OG0005575	0.02797	18	-4596.95	19	-4595.77	0.02538	0.05737	3.90252	2.35528	1	0.124859
OG0005570	0.15198	18	-5336.85	19	-5335.84	0.1575	0.09234	6.20918	2.03354	1	0.153862
OG0005608	0.04302	18	-3959.48	19	-3956.17	0.04628	0.0001	5.77228	6.60939	1	0.0101443
OG0005566	0.06663	18	-3884.54	19	-3884.54	0.06672	0.06556	2.49386	0.001368	1	0.970496
OG0005567	0.04468	18	-5106.21	19	-5106.06	0.04542	0.03293	4.27107	0.299818	1	0.583997
OG0005594	0.09031	18	-6462.94	19	-6461.95	0.08771	0.14601	4.6791	1.98286	1	0.159089
OG0005558	0.12328	18	-4796.45	19	-4796.31	0.1217	0.15019	3.90102	0.289468	1	0.590562
OG0005564	0.07222	18	-5728.07	19	-5727.92	0.07318	0.0561	3.11439	0.30003	1	0.583864
OG0005556	0.05707	18	-3121.66	19	-3119.35	0.06046	0.0001	3.23219	4.61878	1	0.0316237
OG0005593	0.08125	18	-4258.51	19	-4257.82	0.07885	0.15199	3.62083	1.3953	1	0.237512
OG0005577	0.10699	18	-5888.43	19	-5888.4	0.10761	0.09703	1.70144	0.057804	1	0.810001
OG0005582	0.10273	18	-4852.98	19	-4852.84	0.10438	0.07936	3.5142	0.276926	1	0.598723
OG0005589	0.06333	18	-6051.73	19	-6051.48	0.06231	0.08205	4.11296	0.480894	1	0.488018
OG0005590	0.09153	18	-4966.1	19	-4966.08	0.09214	0.08485	3.76079	0.037806	1	0.845833
OG0005599	0.12369	18	-6386.07	19	-6385.69	0.1264	0.09479	4.64082	0.771488	1	0.379757
OG0005584	0.03653	18	-4910.97	19	-4908.69	0.03385	0.09396	3.85303	4.54921	1	0.0329339
OG0005562	0.03505	18	-5843.16	19	-5842.31	0.0362	0.01538	2.34337	1.7024	1	0.191974
OG0005607	0.22309	18	-8491.81	19	-8490.9	0.2184	0.32132	2.8224	1.82163	1	0.177119
OG0005585	0.05348	18	-6093.88	19	-6092.94	0.05152	0.08919	4.46906	1.88109	1	0.170211
OG0005612	0.12012	18	-3509.45	19	-3509.03	0.11663	0.19064	3.44353	0.841458	1	0.35898
OG0005600	0.07136	18	-5731.8	19	-5731.65	0.06925	0.10898	2.19386	0.308276	1	0.57874
OG0005627	0.00843	18	-2805.95	19	-2802.07	0.00583	0.07175	5.67211	7.75711	1	0.00535014
OG0005639	0.07688	18	-1198.92	19	-1197.22	0.0958	0.0001	1.87857	3.40667	1	0.0649334
OG0005638	0.20982	18	-2122.93	19	-2122.64	0.21627	0.11889	3.86022	0.576884	1	0.447536
OG0005609	0.09197	18	-3090.91	19	-3090.34	0.08794	0.14096	4.81692	1.13595	1	0.28651
OG0005579	0.17876	18	-3530.51	19	-3530.51	0.17865	0.18009	2.9899	0.00016	1	0.989908
OG0005634	0.14543	18	-3480.23	19	-3480.22	0.14559	0.14099	4.10817	0.002744	1	0.958223
OG0005631	0.0957	18	-5405.52	19	-5405.48	0.09495	0.10686	4.89127	0.089708	1	0.764549
OG0005610	0.07535	18	-4985.39	19	-4985.38	0.07494	0.08138	5.30122	0.036626	1	0.848229
OG0005642	0.20066	18	-6757.13	19	-6756.39	0.19514	0.26165	3.03822	1.47009	1	0.225332
OG0005617	0.09785	18	-5582.43	19	-5582.38	0.09866	0.08809	5.9251	0.100912	1	0.750738
OG0005630	0.08689	18	-2835.59	19	-2835.37	0.08399	0.11933	2.70072	0.42902	1	0.51247
OG0005611	0.02109	18	-4155.32	19	-4149.3	0.01615	0.1444	5.23173	12.0252	1	0.000524868
OG0005614	0.04932	18	-3290.49	19	-3290.44	0.04858	0.0585	3.37226	0.097394	1	0.75498
OG0005632	0.27941	18	-5315.99	19	-5315.86	0.27622	0.32294	2.25079	0.263026	1	0.608049
OG0005622	0.0076	18	-2550.31	19	-2549.7	0.00845	0.0001	2.36166	1.2311	1	0.267194
OG0005615	0.4037	18	-3100.61	19	-3099.88	0.42405	0.2677	3.43895	1.45718	1	0.227379
OG0005613	0.09872	18	-6582.07	19	-6582.07	0.09863	0.10033	5.71821	0.001818	1	0.96599
OG0005623	0.07788	18	-4153.79	19	-4151.03	0.0821	0.0001	3.68568	5.51138	1	0.0188931
OG0005637	0.04992	18	-3644.99	19	-3644.59	0.0512	0.0219	3.4555	0.809816	1	0.368175
OG0005616	0.0595	18	-4117.35	19	-4115.82	0.05581	0.13889	4.92214	3.06003	1	0.0802401
OG0005640	0.05832	18	-6397.65	19	-6397.64	0.05847	0.05624	5.85007	0.00967	1	0.921665
OG0005629	0.03056	18	-3135.21	19	-3135.19	0.03085	0.02486	3.65048	0.043992	1	0.833868
OG0005649	0.0341	18	-1492.41	19	-1491.95	0.03234	0.07788	4.1961	0.918152	1	0.337961
OG0005636	0.05876	18	-3609.08	19	-3608.95	0.05975	0.04333	5.47751	0.260124	1	0.610035
OG0005657	0.23777	18	-1877.85	19	-1875.64	0.21206	0.47571	2.63827	4.41422	1	0.0356406
OG0005650	0.11651	18	-2115.77	19	-2111	0.10239	0.67418	4.5687	9.53137	1	0.00201989
OG0005641	0.22698	18	-8925.89	19	-8925.83	0.22829	0.20392	4.4311	0.126366	1	0.72223
OG0005624	0.07087	18	-4805.63	19	-4804.48	0.07451	0.02192	4.14734	2.2871	1	0.130453
OG0005621	0.04273	18	-5767.58	19	-5767.52	0.04227	0.0494	3.31392	0.120098	1	0.728928
OG0005598	0.10755	18	-8240.01	19	-8235.19	0.10115	0.28801	4.00991	9.64802	1	0.00189556
OG0005643	0.04835	18	-2726.71	19	-2726.66	0.04884	0.03443	4.43265	0.111348	1	0.738615
OG0005635	0.07385	18	-7034.18	19	-7033.98	0.07226	0.09556	2.05942	0.416734	1	0.518571
OG0005619	0.18457	18	-6188.08	19	-6187.29	0.19057	0.12709	2.6786	1.57777	1	0.209082
OG0005626	0.06189	18	-5089.73	19	-5089.73	0.06193	0.06098	2.74801	0.000742	1	0.978269
OG0005645	0.02276	18	-4952.62	19	-4952.59	0.02299	0.01884	6.64791	0.059464	1	0.807345
OG0005654	0.0192	18	-5887.62	19	-5887.54	0.01958	0.01312	2.63974	0.165668	1	0.683991
OG0005655	0.02107	18	-4020.23	19	-4020.22	0.0214	0.01777	2.7907	0.034494	1	0.85266
OG0005644	0.03717	18	-5974.9	19	-5974.73	0.03791	0.02783	6.19432	0.33841	1	0.560748

## Sheet: ST3
ST3: Branch model with Angiopolybia foreground
orthogroup	w_M0	np_M0	lnL_M0	np_M2	lnL_M2	background_w	foreground_w	kappa_M2	D	DF	chiTest
OG0002787	0.11787	18	-2683.4	19	-2676.17	0.13097	0.0001	3.86159	14.456	1	0.000143475
OG0002783	0.03785	18	-1957.22	19	-1955.51	0.03291	0.12205	6.97485	3.42747	1	0.0641202
OG0002784	0.16557	18	-3058.47	19	-3057.69	0.172	0.08925	6.06706	1.56662	1	0.210699
OG0002834	0.37294	18	-2694.5	19	-2694.02	0.35947	0.54742	3.15042	0.966154	1	0.325641
OG0002853	0.13	18	-803.446	19	-803.1	0.14435	0.0001	1.5491	0.693356	1	0.405025
OG0002957	0.27345	18	-1257.73	19	-1257.68	0.27692	0.21874	3.48808	0.083654	1	0.772405
OG0002807	0.181	18	-1375.7	19	-1374.49	0.16929	0.45849	2.50752	2.43149	1	0.11892
OG0002765	0.03944	18	-853.203	19	-853.157	0.04071	0.02936	3.09995	0.093036	1	0.760352
OG0002795	0.06507	18	-996.867	19	-996.758	0.0673	0.04125	4.43678	0.21678	1	0.641504
OG0002808	0.43556	18	-1770.35	19	-1770.15	0.45148	0.33505	2.23981	0.400574	1	0.526793
OG0002835	0.14801	18	-2524.25	19	-2524.02	0.14413	0.19343	3.42792	0.451986	1	0.501393
OG0002768	0.09088	18	-2100.05	19	-2097.22	0.09641	0.0001	4.90796	5.66094	1	0.0173469
OG0002819	0.2508	18	-2494.61	19	-2493.56	0.2351	0.44246	2.11189	2.09581	1	0.147704
OG0002973	0.33718	18	-2222.05	19	-2221.62	0.32398	0.51367	2.87936	0.867922	1	0.351531
OG0002786	0.03557	18	-3967.51	19	-3967.46	0.0361	0.03022	5.69717	0.103016	1	0.74824
OG0002804	0.00887	18	-1458.43	19	-1447.09	0.0001	0.11824	5.65209	22.684	1	1.909e-06
OG0002824	0.34816	18	-2463.39	19	-2463.39	0.34864	0.3437	3.71324	0.001126	1	0.973231
OG0002831	0.07632	18	-2399.34	19	-2399.07	0.0738	0.11223	4.98849	0.54482	1	0.460442
OG0002859	0.21793	18	-1568.94	19	-1568.34	0.20688	0.41147	2.89739	1.20157	1	0.273008
OG0002845	0.0209	18	-1997.69	19	-1996.3	0.02342	0.0001	5.91573	2.77937	1	0.0954855
OG0002888	0.0089	18	-1410.73	19	-1410.26	0.00728	0.02645	2.34075	0.930202	1	0.33481
OG0002896	0.02112	18	-1293.87	19	-1293.16	0.01647	0.09023	2.28387	1.40308	1	0.236208
OG0002942	0.26678	18	-3058.06	19	-3048.38	0.2219	0.85613	3.2138	19.3549	1	1.0854e-05
OG0002842	0.12313	18	-2246.22	19	-2245.94	0.1261	0.08415	2.71716	0.556684	1	0.455599
OG0002912	0.00918	18	-1941.63	19	-1941.27	0.00992	0.0001	3.69653	0.736994	1	0.390626
OG0002811	0.09815	18	-3435.38	19	-3435.34	0.09719	0.1124	5.13372	0.086026	1	0.769291
OG0002855	0.31461	18	-3118.93	19	-3118.61	0.3067	0.43088	2.49283	0.626252	1	0.428733
OG0002865	0.19472	18	-2284.56	19	-2284.52	0.19667	0.17062	3.6908	0.074102	1	0.785455
OG0002785	0.19435	18	-3874.36	19	-3874.13	0.19101	0.27445	5.37903	0.4517	1	0.501529
OG0002832	0.01567	18	-1575.63	19	-1575.3	0.01642	0.0001	4.35116	0.661642	1	0.415981
OG0002868	0.16629	18	-2191.2	19	-2189.66	0.15166	0.31955	6.16898	3.06483	1	0.0800036
OG0002758	0.17364	18	-6533.58	19	-6533.58	0.17341	0.17667	4.41826	0.00339	1	0.95357
OG0002776	0.28987	18	-3357.12	19	-3356.91	0.28611	0.44293	2.12846	0.41683	1	0.518523
OG0002923	0.04914	18	-2839.08	19	-2837.78	0.0438	0.09225	6.8364	2.59861	1	0.106957
OG0002874	0.07871	18	-1765.61	19	-1764.75	0.08447	0.02522	4.80321	1.71805	1	0.189944
OG0002852	0.29487	18	-3235.61	19	-3235.49	0.299	0.24499	4.39579	0.243314	1	0.621823
OG0002806	0.03976	18	-2267.33	19	-2262.43	0.03312	0.21227	4.27123	9.79338	1	0.00175141
OG0002897	0.01943	18	-1785.27	19	-1784.39	0.02054	0.0001	6.10674	1.75652	1	0.185059
OG0002788	0.05119	18	-4234.65	19	-4233.49	0.04834	0.09143	6.0517	2.32161	1	0.127588
OG0002941	0.03458	18	-2096.11	19	-2094.57	0.03753	0.0001	2.55931	3.08286	1	0.0791211
OG0002810	0.34733	18	-3371.8	19	-3371.61	0.35604	0.28795	4.33481	0.387176	1	0.533788
OG0002914	0.02268	18	-3240.2	19	-3238.82	0.02058	0.05673	5.19498	2.74995	1	0.0972575
OG0002828	0.0896	18	-2821.74	19	-2821.68	0.08766	0.10523	4.89645	0.108526	1	0.741829
OG0002959	0.01697	18	-3331	19	-3331	0.01691	0.01768	7.27392	0.003258	1	0.954482
OG0002818	0.085	18	-4321.11	19	-4319.97	0.08993	0.04486	5.69298	2.27993	1	0.131058
OG0002813	0.03104	18	-4175.64	19	-4175.56	0.0303	0.03731	5.21679	0.158894	1	0.690177
OG0002782	0.03681	18	-4909.93	19	-4909.91	0.03708	0.03372	5.85559	0.036468	1	0.848552
OG0002823	0.11698	18	-3349.86	19	-3349.85	0.11771	0.10945	2.91226	0.030678	1	0.860961
OG0002877	0.16501	18	-2433.73	19	-2432.26	0.17306	0.03785	3.40643	2.95602	1	0.0855585
OG0002812	0.19847	18	-5065.62	19	-5063.82	0.20646	0.09205	4.49772	3.60134	1	0.0577332
OG0002940	0.05292	18	-1591.64	19	-1591.64	0.05289	0.05359	2.62688	0.000136	1	0.990695
OG0002837	0.06585	18	-5136.38	19	-5136.37	0.0654	0.07145	5.03448	0.034152	1	0.853384
OG0002890	0.06416	18	-1871.93	19	-1871.78	0.06636	0.04342	3.83269	0.306638	1	0.579751
OG0002827	0.1309	18	-2534.28	19	-2534.26	0.13201	0.11346	4.94932	0.037644	1	0.84616
OG0002882	0.17353	18	-2871.81	19	-2870.97	0.18129	0.08678	3.49385	1.68649	1	0.194065
OG0002966	0.12211	18	-4564.79	19	-4564.55	0.12497	0.09863	5.78845	0.466212	1	0.494735
OG0002777	0.08202	18	-5157.02	19	-5156.58	0.08395	0.05485	3.61899	0.866644	1	0.351886
OG0002933	0.28441	18	-3485.22	19	-3485.22	0.28494	0.27929	4.25769	0.002986	1	0.956422
OG0002902	0.07312	18	-2493.51	19	-2493.09	0.07043	0.11265	4.16123	0.838976	1	0.35969
OG0002815	0.09386	18	-4137.01	19	-4136.83	0.09193	0.11803	2.50016	0.355442	1	0.551049
OG0002791	0.21691	18	-4750.97	19	-4745.93	0.19548	0.48626	3.93141	10.0682	1	0.0015085
OG0002805	0.1653	18	-3386.74	19	-3386.74	0.16498	0.16885	4.1565	0.003202	1	0.954875
OG0002962	0.16722	18	-3751.88	19	-3751.78	0.16949	0.14037	2.11387	0.201402	1	0.653592
OG0002767	0.01778	18	-4543.14	19	-4539.74	0.01551	0.07676	3.2153	6.79809	1	0.00912557
OG0002800	0.07673	18	-3271.32	19	-3266.25	0.06686	0.2599	2.54834	10.1551	1	0.00143903
OG0002854	0.06955	18	-2720.7	19	-2719.95	0.06668	0.22652	2.98568	1.49542	1	0.221377
OG0002900	0.29077	18	-4467.48	19	-4467.31	0.28587	0.34642	3.08122	0.336582	1	0.561809
OG0002964	0.03328	18	-4042.22	19	-4042.06	0.03413	0.02285	5.9729	0.30794	1	0.578947
OG0002904	0.2036	18	-2824.37	19	-2824.15	0.19973	0.30676	2.99236	0.44245	1	0.505942
OG0002927	0.02651	18	-3130.57	19	-3129.06	0.02782	0.0001	3.26967	3.02623	1	0.0819281
OG0002903	0.02202	18	-2859.7	19	-2857.75	0.02377	0.0001	3.31952	3.90957	1	0.0480118
OG0002775	0.03634	18	-5502.95	19	-5502.9	0.03597	0.04124	4.40432	0.08467	1	0.771066
OG0002846	0.1719	18	-4430.66	19	-4430.25	0.16832	0.24154	3.58442	0.815754	1	0.366425
OG0002796	0.06235	18	-4685.42	19	-4683.98	0.06562	0.02401	6.13194	2.86875	1	0.0903152
OG0002887	0.29569	18	-5191.59	19	-5191.14	0.28871	0.38802	3.58337	0.904884	1	0.341475
OG0002943	0.09869	18	-3006.13	19	-3005.28	0.09403	0.18719	2.42497	1.69464	1	0.192991
OG0002872	0.0537	18	-2755.73	19	-2755.29	0.05462	0.0001	4.07596	0.897348	1	0.343494
OG0002905	0.28451	18	-4359.86	19	-4359.35	0.29346	0.20193	2.75648	1.00499	1	0.316106
OG0002986	0.03022	18	-1829.87	19	-1828.91	0.03196	0.0001	5.16277	1.92501	1	0.165305
OG0002762	0.02417	18	-3721.87	19	-3721.74	0.0236	0.03342	3.17866	0.271094	1	0.602599
OG0002847	0.22659	18	-5071.94	19	-5066.59	0.20782	0.54739	3.14208	10.7093	1	0.001066
OG0002779	0.24002	18	-4390.07	19	-4388.91	0.22965	0.36393	3.24268	2.31104	1	0.128458
OG0002809	0.19556	18	-5686.19	19	-5686.16	0.19479	0.21356	3.76675	0.05275	1	0.818345
OG0002891	0.27275	18	-4774.41	19	-4774.27	0.27628	0.22787	3.22078	0.277728	1	0.598194
OG0002907	0.07585	18	-3285.58	19	-3283.87	0.06967	0.15803	3.35031	3.42954	1	0.0640401
OG0002844	0.06354	18	-3278.05	19	-3277.84	0.06591	0.04415	4.31871	0.418352	1	0.517761
OG0002802	0.2821	18	-5571.53	19	-5571.53	0.28214	0.28141	5.13244	5e-05	1	0.994358
OG0002984	0.16034	18	-2300.46	19	-2299.07	0.17452	0.01073	3.56211	2.77644	1	0.0956606
OG0002875	0.05819	18	-3697.44	19	-3697.05	0.05645	0.0893	5.31443	0.775276	1	0.37859
OG0002863	0.05036	18	-3920.4	19	-3920.2	0.05133	0.03225	4.03635	0.406926	1	0.523534
OG0002869	0.28578	18	-6682.91	19	-6681.39	0.2969	0.17755	4.30698	3.03693	1	0.0813897
OG0002917	0.0159	18	-3324.75	19	-3323.6	0.01791	0.0001	6.23636	2.29598	1	0.129709
OG0002814	0.07877	18	-5597.77	19	-5597.59	0.07755	0.09604	6.16846	0.365212	1	0.545626
OG0002913	0.01538	18	-3311.78	19	-3311.27	0.01455	0.0296	5.10248	1.02785	1	0.310664
OG0002937	0.1198	18	-4217.62	19	-4217.62	0.11977	0.1203	2.11892	9.8e-05	1	0.992101
OG0002906	0.09193	18	-5566.18	19	-5565.77	0.09448	0.07117	5.09443	0.805	1	0.369603
OG0002797	0.04362	18	-4185.35	19	-4183.56	0.03984	0.08951	5.13893	3.57746	1	0.0585687
OG0002849	0.1118	18	-5091.5	19	-5091	0.10875	0.17355	5.91628	1.00554	1	0.315973
OG0002909	0.20838	18	-5794.39	19	-5794.35	0.20961	0.19057	5.19287	0.083922	1	0.772051
OG0002760	0.02646	18	-5181.02	19	-5178.31	0.02801	0.0001	4.28589	5.42649	1	0.0198335
OG0002921	0.21179	18	-4374.4	19	-4373.85	0.21985	0.14707	5.00288	1.11902	1	0.29013
OG0002860	0.0334	18	-3126.64	19	-3126.61	0.03387	0.02775	4.19282	0.069816	1	0.791605
OG0002759	0.03381	18	-3839.19	19	-3836.59	0.0379	0.0001	3.80647	5.19241	1	0.0226857
OG0002821	0.12603	18	-3841.91	19	-3841.87	0.12462	0.13859	4.85956	0.081338	1	0.775492
OG0002911	0.11554	18	-4338.66	19	-4338.26	0.11209	0.1642	3.42853	0.800168	1	0.371043
OG0002925	0.132	18	-4684.58	19	-4684.44	0.13373	0.10627	4.7525	0.2915	1	0.589261
OG0002949	0.04507	18	-3405.99	19	-3405.99	0.04519	0.04307	2.12152	0.001352	1	0.970669
OG0002948	0.05125	18	-4636.77	19	-4636.68	0.05052	0.06114	4.65843	0.184786	1	0.667292
OG0002761	0.12377	18	-6258.39	19	-6255.07	0.1149	0.24455	2.34107	6.64573	1	0.0099394
OG0002880	0.18489	18	-3462.33	19	-3460.59	0.19254	0.05317	2.95404	3.4821	1	0.062036
OG0002780	0.06618	18	-5217.14	19	-5215.88	0.0639	0.14412	5.53999	2.52746	1	0.11188
OG0002981	0.16478	18	-4634.75	19	-4631.58	0.1759	0.06997	4.8733	6.34195	1	0.0117915
OG0002922	0.13188	18	-4584.59	19	-4584.44	0.12976	0.16489	3.36686	0.294892	1	0.587103
OG0002833	0.08145	18	-6355.47	19	-6352.1	0.08816	0.02941	4.32702	6.74623	1	0.00939459
OG0002910	0.01138	18	-3639.16	19	-3638.79	0.01028	0.02186	2.76383	0.75567	1	0.384687
OG0002885	0.08927	18	-6884.64	19	-6883.3	0.09325	0.04983	6.69578	2.67156	1	0.102156
OG0002850	0.06746	18	-6515.89	19	-6512.13	0.06185	0.18262	5.42036	7.52716	1	0.00607757
OG0002951	0.15728	18	-7631.22	19	-7631.16	0.1584	0.14459	3.78695	0.115586	1	0.733872
OG0002894	0.26106	18	-6566.43	19	-6564.01	0.24764	0.4581	5.98361	4.84065	1	0.0277965
OG0002996	0.15787	18	-2794.08	19	-2794.06	0.15691	0.17328	3.69826	0.037768	1	0.84591
OG0002920	0.17118	18	-6820.67	19	-6817.06	0.18044	0.0723	4.17194	7.22262	1	0.00719906
OG0002992	0.21997	18	-1856.87	19	-1856.71	0.22421	0.14663	4.99162	0.323636	1	0.569431
OG0002843	0.02858	18	-4794.85	19	-4789.76	0.02088	0.13239	6.0478	10.1961	1	0.00140739
OG0002915	0.15611	18	-7164.67	19	-7164.67	0.15583	0.15994	3.71719	0.007546	1	0.930777
OG0002938	0.07509	18	-3889.56	19	-3889.27	0.07323	0.14448	3.79938	0.58959	1	0.442578
OG0002770	0.09726	18	-6167.79	19	-6166.86	0.09336	0.14955	4.01755	1.84363	1	0.174526
OG0002931	0.28029	18	-9941.47	19	-9937.76	0.2672	0.50303	3.012	7.4122	1	0.00647829
OG0002878	0.06707	18	-5819.45	19	-5818.82	0.06938	0.04246	6.05598	1.26346	1	0.260997
OG0002971	0.04406	18	-5047.36	19	-5046.74	0.04525	0.01671	3.48444	1.24207	1	0.265073
OG0002994	0.14942	18	-2787.77	19	-2787.1	0.15401	0.06062	4.37852	1.32637	1	0.249453
OG0002976	0.06168	18	-3282.2	19	-3282.17	0.06228	0.05069	4.21915	0.07153	1	0.789122
OG0002978	0.13088	18	-5202.14	19	-5202.08	0.1295	0.14465	5.79557	0.12128	1	0.72765
OG0002798	0.06242	18	-5614.72	19	-5613.88	0.05973	0.10411	2.64308	1.67256	1	0.195916
OG0002838	0.16359	18	-9518.98	19	-9518.89	0.16461	0.14517	2.79164	0.19468	1	0.65905
OG0002895	0.18947	18	-6972.61	19	-6972.5	0.19189	0.16941	3.36335	0.231078	1	0.630726
OG0002830	0.34302	18	-10013.5	19	-10013.5	0.34245	0.34819	1.96533	0.005088	1	0.943135
OG0002947	0.11988	18	-5672.79	19	-5672.69	0.11787	0.13564	4.58025	0.192322	1	0.660991
OG0002956	0.17239	18	-4800.6	19	-4800.5	0.16994	0.19586	4.57562	0.191502	1	0.661669
OG0002963	0.01457	18	-4794.63	19	-4793.51	0.01277	0.03345	4.1589	2.23927	1	0.134544
OG0002918	0.07556	18	-7162.2	19	-7161.98	0.07478	0.11232	2.65338	0.437078	1	0.508536
OG0002929	0.03393	18	-4538.14	19	-4536.26	0.03108	0.08865	2.00751	3.76772	1	0.0522508
OG0002817	0.13979	18	-7495.52	19	-7495.43	0.13857	0.15966	4.08308	0.175084	1	0.675632
OG0002901	0.08074	18	-5850.5	19	-5850.49	0.0804	0.08579	4.91462	0.023176	1	0.879
OG0002995	0.3546	18	-3137.55	19	-3137.12	0.36527	0.25186	2.36774	0.853644	1	0.355524
OG0002987	0.22495	18	-7039.39	19	-7039.14	0.22859	0.1902	4.63008	0.512812	1	0.473924
OG0002928	0.19007	18	-8443.18	19	-8442.89	0.1872	0.23203	2.87692	0.578764	1	0.446797
OG0002997	0.0567	18	-4757.5	19	-4756.44	0.05917	0.02585	6.62363	2.11503	1	0.145859
OG0002793	0.04037	18	-6418.68	19	-6415.59	0.04342	0.0001	4.59196	6.18166	1	0.0129081
OG0002789	0.34	18	-8505.8	19	-8505.8	0.33946	0.35327	3.2549	0.01139	1	0.915008
OG0002985	0.0754	18	-6323.98	19	-6322.72	0.07192	0.11699	3.98636	2.5223	1	0.112247
OG0002990	0.07028	18	-4137.19	19	-4136.17	0.07399	0.03313	5.74034	2.04628	1	0.152578
OG0002980	0.0786	18	-4457.03	19	-4456.45	0.08187	0.03651	3.57153	1.16554	1	0.28032
OG0002879	0.07954	18	-6109.21	19	-6109.11	0.0781	0.09439	6.49244	0.188548	1	0.664128
OG0002916	0.02649	18	-6706.32	19	-6706.08	0.02597	0.03886	3.15402	0.47598	1	0.490249
OG0002988	0.16254	18	-5244.56	19	-5244.26	0.16536	0.11632	2.31604	0.60863	1	0.435304
OG0002840	0.26381	18	-9637.51	19	-9629.21	0.28469	0.10483	3.31788	16.6016	1	4.6112e-05
OG0002993	0.07947	18	-6784.14	19	-6784.14	0.07948	0.07936	5.10156	2e-05	1	0.996432
OG0002991	0.12082	18	-4524.41	19	-4523.71	0.1253	0.07147	4.63527	1.40032	1	0.23667
OG0003003	0.03152	18	-1731.02	19	-1729.9	0.02823	0.09093	3.79142	2.2296	1	0.135389
OG0002999	0.01473	18	-2703.51	19	-2699.32	0.01119	0.07737	3.35526	8.3768	1	0.00380042
OG0003008	0.15886	18	-2722.01	19	-2721.91	0.16122	0.12926	4.28255	0.200298	1	0.65448
OG0003000	0.00581	18	-2294.47	19	-2293.95	0.00628	0.0001	7.26263	1.03063	1	0.310011
OG0002998	0.08418	18	-6258.14	19	-6257.9	0.08234	0.10661	3.33444	0.474472	1	0.490937
OG0003006	0.23619	18	-7894.91	19	-7892.86	0.24449	0.13225	3.62944	4.08581	1	0.0432447
OG0003001	0.03724	18	-4709.09	19	-4709.08	0.03751	0.0334	2.57895	0.034398	1	0.852863
OG0003004	0.06733	18	-3622.29	19	-3620.99	0.07072	0.03112	2.88897	2.61264	1	0.106015
OG0003011	0.12588	18	-4148.95	19	-4148.52	0.12929	0.08916	6.2279	0.861372	1	0.353355
OG0003016	0.05757	18	-3586.47	19	-3585.66	0.05402	0.09042	6.56948	1.62078	1	0.202983
OG0003010	0.01873	18	-4461.33	19	-4460.8	0.01764	0.03643	2.38133	1.06023	1	0.303164
OG0003014	0.12981	18	-6995.98	19	-6994.24	0.12431	0.20145	3.68502	3.47965	1	0.0621278
OG0003012	0.14342	18	-5739.17	19	-5739.17	0.14345	0.14315	3.20409	2e-05	1	0.996432
OG0003025	0.19434	18	-1199.05	19	-1197.28	0.21923	0.0001	3.51373	3.53497	1	0.0600873
OG0003018	0.06159	18	-3911.61	19	-3900.21	0.0464	0.20578	5.69674	22.7952	1	1.802e-06
OG0003022	0.05295	18	-1615.63	19	-1615.53	0.05177	0.07608	3.1262	0.198342	1	0.656062
OG0003019	0.33278	18	-2920.55	19	-2920.37	0.3391	0.26216	3.40769	0.356456	1	0.550481
OG0003030	0.10662	18	-3305.29	19	-3304.91	0.10997	0.07202	5.60296	0.758838	1	0.383692
OG0003065	0.19393	18	-1004.21	19	-1003.65	0.20634	0.08893	4.44366	1.11523	1	0.290948
OG0003017	0.08407	18	-7718.87	19	-7717.26	0.0869	0.04249	3.75642	3.23023	1	0.0722904
OG0003020	0.14061	18	-5781.22	19	-5776.29	0.1277	0.28824	3.76905	9.85817	1	0.00169079
OG0003024	0.03532	18	-4202.42	19	-4202.42	0.03538	0.03463	3.88204	0.000776	1	0.977776
OG0003090	0.17861	18	-960.424	19	-960.42	0.17925	0.15951	2.91349	0.00885	1	0.92505
OG0003039	0.03184	18	-2967.05	19	-2965.11	0.02676	0.10805	6.00613	3.8895	1	0.048589
OG0003026	0.113	18	-4906.61	19	-4906.1	0.11655	0.08045	4.50395	1.01513	1	0.313677
OG0003058	0.06799	18	-1706.64	19	-1706.5	0.06627	0.10303	4.31388	0.281046	1	0.596016
OG0003036	0.08626	18	-2954.97	19	-2954.06	0.08171	0.16036	6.39247	1.83557	1	0.175472
OG0003136	0.22764	18	-2507.29	19	-2505.72	0.2449	0.11955	4.26091	3.13159	1	0.076789
OG0003089	0.08636	18	-1710.84	19	-1710.16	0.09056	0.03041	4.71087	1.36348	1	0.242935
OG0003162	0.01259	18	-1203.43	19	-1203.07	0.01089	0.03288	2.31688	0.716154	1	0.397408
OG0003068	0.13804	18	-2907.73	19	-2903.45	0.12416	0.46138	3.79386	8.55284	1	0.00344984
OG0003148	0.14213	18	-1124.62	19	-1124.61	0.1408	0.15596	4.76824	0.013268	1	0.908297
OG0003035	0.08877	18	-2846.67	19	-2846.67	0.08921	0.08314	5.51575	0.013626	1	0.907074
OG0003046	0.13826	18	-3676.06	19	-3675.8	0.1408	0.09763	2.72086	0.523834	1	0.469211
OG0003041	0.06234	18	-2890.31	19	-2890.28	0.0618	0.0758	2.30104	0.05989	1	0.80667
OG0003159	0.08802	18	-1557.86	19	-1557.69	0.08991	0.05574	2.03243	0.336842	1	0.561658
OG0003047	0.12531	18	-4438.94	19	-4438.83	0.12695	0.10655	5.0787	0.21926	1	0.639604
OG0003071	0.0971	18	-3205.1	19	-3204.47	0.10143	0.06259	4.48358	1.25449	1	0.262697
OG0003177	0.00456	18	-1298.84	19	-1298.57	0.00501	0.0001	4.59371	0.540136	1	0.462376
OG0003029	0.21582	18	-5325.14	19	-5323.48	0.20463	0.39033	3.51047	3.32142	1	0.0683829
OG0003075	0.13198	18	-1606.32	19	-1604.19	0.14201	0.0001	2.07521	4.26554	1	0.0388928
OG0003040	0.22796	18	-4964.4	19	-4962.12	0.21619	0.45398	4.00022	4.56199	1	0.032689
OG0003114	0.21073	18	-3975.17	19	-3975.16	0.21138	0.19681	3.0727	0.022284	1	0.881334
OG0003084	0.25485	18	-3132.52	19	-3132.21	0.24831	0.35068	3.17042	0.627358	1	0.428326
OG0003171	0.06334	18	-1324.56	19	-1324.56	0.06341	0.06148	1.85577	0.000734	1	0.978386
OG0003072	0.03005	18	-4115.62	19	-4113.35	0.02612	0.07862		4.52833	1	0.0333381
OG0003135	0.02961	18	-1785.87	19	-1785.55	0.03154	0.01465	6.80012	0.624972	1	0.429206
OG0003048	0.06563	18	-2776.99	19	-2776.57	0.0631	0.11213	4.9068	0.836378	1	0.360435
OG0003049	0.49257	18	-3982.46	19	-3981.67	0.47594	0.79598	3.44635	1.58159	1	0.208532
OG0003087	0.05342	18	-2122.13	19	-2122.12	0.05284	0.0622	9.75557	0.020744	1	0.885479
OG0003123	0.07433	18	-2676.61	19	-2673.03	0.06652	0.34679	5.28052	7.15872	1	0.00746003
OG0003095	0.14072	18	-4233.89	19	-4232.7	0.13415	0.22395	2.65242	2.37052	1	0.123646
OG0003167	0.07341	18	-2697.02	19	-2696.98	0.07274	0.08622	3.95703	0.079162	1	0.778436
OG0003064	0.09463	18	-3633.45	19	-3633.23	0.09704	0.07355	2.5466	0.443156	1	0.505603
OG0003160	0.08065	18	-2324.71	19	-2324.51	0.08292	0.05631	5.35045	0.410558	1	0.521686
OG0003073	0.03456	18	-5542.84	19	-5538.93	0.0381	0.00231	6.07272	7.81506	1	0.00518126
OG0003069	0.13987	18	-3221.1	19	-3220.36	0.14503	0.07571	4.90648	1.46636	1	0.225922
OG0003121	0.08568	18	-3075.56	19	-3072.84	0.07973	0.34294	3.91749	5.44501	1	0.0196243
OG0003147	0.0585	18	-2455.29	19	-2454.78	0.06136	0.03296	6.2623	1.0093	1	0.315072
OG0003082	0.17325	18	-4124.66	19	-4124.21	0.16782	0.22378	5.81861	0.892068	1	0.344918
OG0003141	0.11438	18	-4122.3	19	-4122.08	0.11709	0.09024	4.11528	0.444916	1	0.504759
OG0003081	0.03902	18	-5370.6	19	-5370.43	0.03987	0.02924	4.31985	0.339392	1	0.56018
OG0003110	0.05269	18	-2926	19	-2924.53	0.05562	0.01293	4.86813	2.92224	1	0.0873665
OG0003174	0.07896	18	-2887.9	19	-2887.69	0.07685	0.10685	3.78405	0.405424	1	0.524301
OG0003093	0.04045	18	-4047.37	19	-4047.32	0.04111	0.03403	3.11084	0.108226	1	0.742173
OG0003031	0.02087	18	-5351.36	19	-5351.25	0.02118	0.01335	2.75256	0.224106	1	0.635929
OG0003109	0.2608	18	-4870.66	19	-4870.23	0.26722	0.19496	4.34121	0.861768	1	0.353244
OG0003146	0.23383	18	-4025.45	19	-4024.71	0.22705	0.37774	2.2952	1.4846	1	0.223057
OG0003163	0.11771	18	-2461.25	19	-2460.5	0.11237	0.22772	4.68685	1.51241	1	0.218772
OG0003053	0.02797	18	-4650.39	19	-4650.38	0.02812	0.0262	5.28965	0.01288	1	0.909642
OG0003117	0.11506	18	-3967.52	19	-3967.36	0.11698	0.09141	3.94635	0.326526	1	0.567712
OG0003124	0.04445	18	-3203.56	19	-3202.96	0.0466	0.01882	5.709	1.19905	1	0.273511
OG0003098	0.0465	18	-3620.37	19	-3617.32	0.03921	0.11589	6.31857	6.10274	1	0.0134972
OG0003050	0.19507	18	-4130.99	19	-4129.9	0.1872	0.33997	3.2483	2.17852	1	0.139949
OG0003054	0.09475	18	-5863.49	19	-5863.27	0.09273	0.11285	4.83595	0.446218	1	0.504136
OG0003169	0.12422	18	-3529.13	19	-3529.09	0.12536	0.10828	3.84062	0.083694	1	0.772352
OG0003092	0.02276	18	-5264.09	19	-5263.5	0.02181	0.0372	3.83035	1.18231	1	0.276886
OG0003021	0.10096	18	-5842.72	19	-5842.56	0.09891	0.11754	4.04152	0.333124	1	0.563825
OG0003129	0.02712	18	-3052.2	19	-3052.16	0.02759	0.02032	2.89894	0.09012	1	0.764025
OG0003185	0.15924	18	-2589.84	19	-2589.83	0.15974	0.14971	6.67851	0.012904	1	0.909558
OG0003172	0.22352	18	-4596.74	19	-4596.69	0.22509	0.19858	2.75872	0.100084	1	0.751729
OG0003107	0.14005	18	-2707.83	19	-2707.59	0.14688	0.06808	3.02567	0.479908	1	0.488464
OG0003102	0.04893	18	-3227.12	19	-3226.46	0.04973	0.0001	3.53156	1.31922	1	0.250732
OG0003153	0.02747	18	-5430.4	19	-5430.4	0.02733	0.02909	4.80781	0.01468	1	0.903563
OG0003154	0.11523	18	-3963.21	19	-3963.07	0.11359	0.14321	5.76925	0.270322	1	0.603116
OG0003062	0.04443	18	-4779.07	19	-4776.84	0.04711	0.0001	5.23944	4.46424	1	0.0346114
OG0003150	0.37474	18	-4608.65	19	-4597.14	0.32334	1.26578	3.07465	23.0282	1	1.596e-06
OG0003119	0.23505	18	-5327.79	19	-5327.38	0.24004	0.17796	3.98429	0.813484	1	0.367092
OG0003176	0.26425	18	-5444.17	19	-5443.94	0.26002	0.32174	3.02752	0.472996	1	0.491612
OG0003178	0.07009	18	-4201.23	19	-4199.12	0.07523	0.01425	7.23642	4.20317	1	0.0403484
OG0003078	0.02924	18	-6443.5	19	-6442.91	0.02802	0.04765	4.52002	1.16707	1	0.280005
OG0003184	0.6094	18	-5595.49	19	-5595.47	0.60607	0.64569	3.0667	0.049568	1	0.823817
OG0003112	0.08198	18	-6084.59	19	-6081.65	0.08614	0.0266	3.19892	5.87577	1	0.0153506
OG0003056	0.08463	18	-4156.71	19	-4156.08	0.08807	0.05081	4.91886	1.26221	1	0.261233
OG0003043	0.07259	18	-6257.62	19	-6248.94	0.06375	0.23979	2.27205	17.3637	1	3.0867e-05
OG0003125	0.0708	18	-3757.13	19	-3756.61	0.07327	0.02802	4.59645	1.04171	1	0.307424
OG0003157	0.02775	18	-3735.29	19	-3733.82	0.02883	0.0001	6.28078	2.94354	1	0.0862214
OG0003149	0.03183	18	-2929.99	19	-2929.93	0.03087	0.04287	2.71696	0.10733	1	0.743205
OG0003173	0.17612	18	-5389.27	19	-5385.36	0.18771	0.0572	4.05108	7.81702	1	0.00517566
OG0003099	0.02649	18	-2880.22	19	-2879.83	0.028	0.00818	5.3143	0.786006	1	0.375311
OG0003126	0.01792	18	-5123.21	19	-5122.79	0.01878	0.00808	8.66608	0.845398	1	0.357857
OG0003070	0.07775	18	-5946.71	19	-5943.44	0.0732	0.21476	3.8348	6.55513	1	0.0104582
OG0003051	0.07714	18	-2986.16	19	-2985.83	0.07274	0.11147	6.69124	0.652174	1	0.419336
OG0003151	0.08211	18	-5928.68	19	-5926.3	0.08657	0.03546	3.82507	4.74843	1	0.029325
OG0003164	0.05405	18	-5532.44	19	-5531.99	0.0526	0.08401	3.50099	0.90287	1	0.342013
OG0003094	0.03298	18	-6300.69	19	-6295.86	0.03499	0.0001	3.282	9.67344	1	0.00186951
OG0003137	0.06514	18	-4539.8	19	-4539.71	0.06603	0.05212	3.54287	0.167174	1	0.682636
OG0003182	0.15645	18	-4873.95	19	-4871.29	0.14449	0.28407	4.01517	5.30861	1	0.0212202
OG0003156	0.08993	18	-4631.26	19	-4631.13	0.08847	0.10886	3.72556	0.270226	1	0.60318
OG0003165	0.23015	18	-7640.67	19	-7639.97	0.22467	0.30863	3.65516	1.38704	1	0.238905
OG0003130	0.08734	18	-5697.79	19	-5696.83	0.0839	0.14273	2.57976	1.91141	1	0.166807
OG0003085	0.10456	18	-4732.31	19	-4732.29	0.10396	0.11541	4.22424	0.049138	1	0.82457
OG0003057	0.02916	18	-3518.8	19	-3518.74	0.02993	0.02202	6.71199	0.10924	1	0.741011
OG0003077	0.06406	18	-5354.03	19	-5353.79	0.06534	0.04636	5.18217	0.489098	1	0.48433
OG0003140	0.04649	18	-5801.4	19	-5800.71	0.04865	0.02749	6.17924	1.3762	1	0.240749
OG0003105	0.05189	18	-6995.59	19	-6995.03	0.05035	0.07629	3.41826	1.13185	1	0.287381
OG0003218	0.15138	18	-1271.42	19	-1269.91	0.14207	0.9191	2.46237	3.00453	1	0.0830319
OG0003079	0.13123	18	-6678.17	19	-6676.83	0.12567	0.21277	2.57902	2.69891	1	0.100417
OG0003061	0.12193	18	-7017.97	19	-7006.36	0.10962	0.43635	2.66661	23.2074	1	1.454e-06
OG0003166	0.03648	18	-4582.86	19	-4581.53	0.03416	0.06712	4.61807	2.65543	1	0.103197
OG0003170	0.1834	18	-5639.28	19	-5639.24	0.18498	0.17008	4.59449	0.07751	1	0.780701
OG0003271	0.0464	18	-865.965	19	-865.658	0.04901	0.0001	6.67213	0.614242	1	0.433195
OG0003183	0.08752	18	-4362.43	19	-4361.82	0.08466	0.13789	3.69171	1.2165	1	0.270048
OG0003100	0.04313	18	-6829.07	19	-6829.05	0.04339	0.04039	5.05226	0.036358	1	0.848778
OG0003113	0.19049	18	-7736.72	19	-7736.62	0.18897	0.21566	3.43107	0.19942	1	0.655189
OG0003055	0.11491	18	-5923.71	19	-5922.92	0.11872	0.07004	4.34441	1.58292	1	0.20834
OG0003091	0.18944	18	-7733.27	19	-7730.5	0.17818	0.33196	2.85484	5.54278	1	0.018557
OG0003142	0.20148	18	-6401.14	19	-6396.68	0.1801	0.37539	4.59245	8.93081	1	0.00280399
OG0003226	0.16146	18	-1940.88	19	-1940.56	0.16504	0.08897	3.01089	0.622562	1	0.430097
OG0003122	0.05247	18	-6458	19	-6457.88	0.05323	0.04251	5.26972	0.24864	1	0.618034
OG0003200	0.14756	18	-2590.15	19	-2588.91	0.13789	0.24885	4.67958	2.47897	1	0.115378
OG0003194	0.09028	18	-1666.49	19	-1665.19	0.09818	0.0001	4.00883	2.60908	1	0.106253
OG0003127	0.07168	18	-2620.52	19	-2620.43	0.07288	0.04779	4.15205	0.162572	1	0.686799
OG0003180	0.12362	18	-4858.21	19	-4858.2	0.12322	0.13311	3.71826	0.02194	1	0.882247
OG0003191	0.19712	18	-2956.95	19	-2956.89	0.20004	0.17333	4.52428	0.134506	1	0.713805
OG0003257	0.20495	18	-1377.13	19	-1376.8	0.21035	0.10395	3.07523	0.66086	1	0.416256
OG0003222	0.1202	18	-2422.97	19	-2422.93	0.11872	0.13896	3.81414	0.087878	1	0.766892
OG0003143	0.14313	18	-5820.68	19	-5820.6	0.14148	0.1642	5.3402	0.173794	1	0.676762
OG0003215	0.09403	18	-2692.23	19	-2692.1	0.09583	0.06916	4.96443	0.252432	1	0.615368
OG0003240	0.19672	18	-2194.16	19	-2193.28	0.18806	0.36932	3.32276	1.76374	1	0.184159
OG0003217	0.01401	18	-2907.75	19	-2907.3	0.01485	0.0001	6.49582	0.901312	1	0.34243
OG0003216	0.2948	18	-2770.73	19	-2767.36	0.31614	0.05584	2.4939	6.73207	1	0.00946945
OG0003193	0.14437	18	-4210.59	19	-4210.24	0.14033	0.19481	5.2879	0.688668	1	0.406618
OG0003250	0.03004	18	-1732.42	19	-1732.41	0.02969	0.03303	6.07949	0.017172	1	0.895742
OG0003203	0.23937	18	-4517.78	19	-4517.65	0.24201	0.19975	3.13982	0.250286	1	0.616874
OG0003207	0.03227	18	-2793.79	19	-2793.21	0.03397	0.01267		1.15672	1	0.282148
OG0003225	0.12371	18	-3759.53	19	-3757.66	0.11582	0.24675	4.51782	3.73815	1	0.0531834
OG0003060	0.05174	18	-5781.27	19	-5781.18	0.05252	0.04275	4.79081	0.193224	1	0.660247
OG0003268	0.17463	18	-2644.17	19	-2640.76	0.15677	0.51328	4.48775	6.8244	1	0.00899208
OG0003221	0.05376	18	-4490.33	19	-4490.24	0.05451	0.04499	4.74223	0.169628	1	0.680443
OG0003261	0.10362	18	-4488.08	19	-4488.07	0.10411	0.09833	5.1455	0.02342	1	0.87837
OG0003032	0.04901	18	-6149.25	19	-6145.56	0.05259	0.0001	3.55249	7.38214	1	0.00658747
OG0003219	0.19061	18	-5995.7	19	-5995.52	0.1932	0.16124	4.44429	0.356546	1	0.550431
OG0003260	0.17016	18	-2832.75	19	-2831.91	0.17666	0.07569	4.14109	1.69004	1	0.193596
OG0003213	0.04124	18	-4074.28	19	-4074.22	0.04083	0.05092	2.32312	0.109322	1	0.740917
OG0003233	0.01758	18	-2835.24	19	-2834.14	0.01923	0.0001	6.81876	2.19807	1	0.138184
OG0003224	0.10202	18	-4336.43	19	-4336.43	0.10189	0.10338	4.93176	0.001102	1	0.973518
OG0003223	0.05076	18	-5283.84	19	-5283.75	0.05004	0.05996	4.79231	0.189022	1	0.663732
OG0003211	0.08279	18	-7245.41	19	-7245.25	0.08163	0.09738	4.82497	0.31775	1	0.572963
OG0003204	0.64201	18	-7455.88	19	-7455.77	0.63413	0.7164	3.19791	0.221968	1	0.637544
OG0003265	0.14426	18	-5740.61	19	-5738.15	0.15107	0.06738	3.72021	4.91549	1	0.0266169
OG0003244	0.04329	18	-4385.36	19	-4385.33	0.043	0.04933	3.53861	0.057008	1	0.811289
OG0003197	0.13729	18	-4520.99	19	-4520.99	0.13738	0.13634	2.25422	0.000324	1	0.985639
OG0003247	0.08218	18	-3144.35	19	-3144.29	0.08271	0.05674	1.96515	0.124836	1	0.723848
OG0003201	0.04346	18	-3973.07	19	-3970.08	0.03694	0.1181	3.74813	5.98288	1	0.0144454
OG0003228	0.04334	18	-6737.27	19	-6737.16	0.0427	0.05045	3.81339	0.216358	1	0.641829
OG0003198	0.03789	18	-6172.33	19	-6172.17	0.03714	0.04842	3.06176	0.331954	1	0.564511
OG0003262	0.053	18	-5289.3	19	-5289.3	0.05295	0.05381	5.85866	0.001188	1	0.972504
OG0003210	0.08111	18	-6559.02	19	-6556.01	0.08727	0.03522	5.7561	6.02224	1	0.0141267
OG0003272	0.0386	18	-3953.54	19	-3953.39	0.04003	0.02309	3.01244	0.312538	1	0.576127
OG0003251	0.05746	18	-3777.73	19	-3775.68	0.0524	0.13957	4.14227	4.0965	1	0.042972
OG0003144	0.09933	18	-7492.16	19	-7490.16	0.10462	0.03567	5.13398	3.98966	1	0.0457804
OG0003206	0.09194	18	-7066.37	19	-7065.16	0.08792	0.13945	4.66006	2.41662	1	0.120054
OG0003264	0.13623	18	-5064.85	19	-5063.67	0.13138	0.22981	4.99465	2.35428	1	0.12494
OG0003242	0.11382	18	-4623.44	19	-4621.86	0.12043	0.04493	3.41489	3.15838	1	0.075538
OG0003238	0.05878	18	-4648.47	19	-4648.02	0.06058	0.03822	4.09222	0.915944	1	0.338542
OG0003269	0.11889	18	-5302.98	19	-5302.56	0.11606	0.16419	5.74366	0.842616	1	0.35865
OG0003246	0.02212	18	-3966.5	19	-3966.3	0.02285	0.01238	4.53394	0.41045	1	0.521741
OG0003220	0.09278	18	-5561.2	19	-5561.2	0.09267	0.09404	4.13246	0.001074	1	0.973856
OG0003239	0.18799	18	-5278.13	19	-5276.74	0.17953	0.30028	4.62837	2.76781	1	0.0961775
OG0003205	0.21274	18	-9884.87	19	-9884.29	0.20877	0.26579	4.13294	1.15239	1	0.283049
OG0003208	0.08479	18	-7164.34	19	-7163.85	0.0825	0.11694	2.17175	0.981716	1	0.321776
OG0003229	0.17767	18	-6911.99	19	-6909.6	0.18553	0.08836	3.4455	4.79743	1	0.0285023
OG0003230	0.12514	18	-7914.18	19	-7914.14	0.12587	0.11832	5.37543	0.06247	1	0.802634
OG0003195	0.21493	18	-8966.66	19	-8963.29	0.20638	0.42843	2.21716	6.74437	1	0.00940438
OG0003273	0.05071	18	-2121.52	19	-2120.88	0.04791	0.10102	4.98136	1.28376	1	0.257202
OG0003227	0.13897	18	-7143.73	19	-7142.91	0.14301	0.08354	5.6165	1.62294	1	0.202682
OG0003235	0.09682	18	-5660.03	19	-5660.02	0.09651	0.10134	2.69586	0.01053	1	0.918268
OG0003232	0.11274	18	-6192.54	19	-6191.79	0.10961	0.16574	3.5956	1.50863	1	0.219349
OG0003212	0.02922	18	-6453.81	19	-6453.58	0.02942	0.0001	3.29522	0.451378	1	0.501681
OG0003308	0.01241	18	-4006.88	19	-4005.37	0.01339	0.0001	5.18412	3.02744	1	0.0818669
OG0003256	0.06674	18	-6224.07	19	-6223.34	0.06463	0.10059	3.01851	1.45576	1	0.227607
OG0003286	0.02479	18	-2593.82	19	-2592.5	0.02175	0.06459	5.22587	2.65371	1	0.103309
OG0003234	0.0323	18	-6331.17	19	-6326.38	0.03539	0.0001	4.05998	9.58635	1	0.0019603
OG0003295	0.19216	18	-3880.62	19	-3880.45	0.18872	0.23011	4.07975	0.322122	1	0.570335
OG0003290	0.02022	18	-2619.75	19	-2619.75	0.02016	0.02125	6.66925	0.002406	1	0.960879
OG0003307	0.08132	18	-3967.93	19	-3967.92	0.08148	0.07853	4.04087	0.004336	1	0.947499
OG0003304	0.04402	18	-6618.82	19	-6618.19	0.04535	0.02565	4.35686	1.26543	1	0.260627
OG0003279	0.04686	18	-4851.92	19	-4851.84	0.04621	0.05447	3.92543	0.16143	1	0.687843
OG0003288	0.1887	18	-4625.09	19	-4623.47	0.19736	0.10395	3.67658	3.24267	1	0.0717435
OG0003278	0.0242	18	-4116.77	19	-4116.77	0.02417	0.02451	3.99805	0.000648	1	0.979691
OG0003296	0.04816	18	-2773.31	19	-2773.31	0.04792	0.05115	3.97885	0.009612	1	0.9219
OG0003297	0.11559	18	-4417.69	19	-4415.27	0.10754	0.25485	3.91491	4.85611	1	0.0275484
OG0003255	0.0894	18	-9984.83	19	-9978.46	0.0841	0.21008	2.28653	12.7413	1	0.000357674
OG0003303	0.08213	18	-4912.22	19	-4912	0.08038	0.10458	3.91624	0.458496	1	0.498328
OG0003305	0.07323	18	-3489.12	19	-3486.24	0.0795	0.0123	3.49937	5.75371	1	0.0164539
OG0003283	0.04985	18	-5112.72	19	-5112.17	0.04772	0.07304	5.21185	1.10457	1	0.293265
OG0003277	0.0811	18	-4379.77	19	-4375.26	0.06705	0.22925	4.46191	9.01014	1	0.00268486
OG0003276	0.04966	18	-6152.4	19	-6151.93	0.04853	0.07271	3.21368	0.935724	1	0.33338
OG0003291	0.00861	18	-4696.51	19	-4695.63	0.00923	0.0001	3.45006	1.75785	1	0.184893
OG0003310	0.26666	18	-1935.91	19	-1935.54	0.27516	0.15303	3.62025	0.75591	1	0.384612
OG0003309	0.02593	18	-1065.45	19	-1065.38	0.02506	0.03871	3.04976	0.13682	1	0.711463
OG0003293	0.0365	18	-4856.15	19	-4855.65	0.03526	0.05839	7.09705	0.985724	1	0.32079
OG0003330	0.18549	18	-1883.31	19	-1883.28	0.18347	0.20822	4.17473	0.07	1	0.791337
OG0003287	0.04494	18	-4175.7	19	-4175.33	0.04704	0.02537	3.65062	0.737692	1	0.390401
OG0003325	0.01282	18	-1502.26	19	-1501.57	0.01351	0.0001	8.39189	1.37889	1	0.24029
OG0003326	0.07618	18	-1404.22	19	-1404.21	0.07578	0.08407	4.01635	0.01342	1	0.907776
OG0003327	0.17253	18	-2653.67	19	-2652.54	0.18191	0.09177	3.79925	2.26481	1	0.132342
OG0003334	0.03332	18	-2208.54	19	-2206.93	0.03568	0.0001	5.43993	3.23034	1	0.0722858
OG0003311	0.03548	18	-2194.05	19	-2192.59	0.03838	0.0001	2.84727	2.91487	1	0.0877665
OG0003315	0.01415	18	-1569.71	19	-1569.52	0.01444	0.0001	2.95029	0.363982	1	0.546303
OG0003281	0.04161	18	-7353.43	19	-7353.43	0.04165	0.04093	2.6835	0.000886	1	0.976254
OG0003282	0.09016	18	-6498	19	-6497.47	0.08832	0.14986	4.16435	1.054	1	0.304588
OG0003324	0.13564	18	-3398.65	19	-3397.77	0.14113	0.07861	4.20976	1.76764	1	0.183675
OG0003317	0.2897	18	-6165.21	19	-6165.08	0.28657	0.33428	2.797	0.274982	1	0.600009
OG0003284	0.03991	18	-5921.78	19	-5919.46	0.04267	0.01374	2.32778	4.63464	1	0.0313327
OG0003314	0.0756	18	-3444.54	19	-3443.5	0.08092	0.03807	6.43643	2.07211	1	0.150014
OG0003333	0.2093	18	-5929.55	19	-5927.76	0.21771	0.11524	3.55447	3.562	1	0.0591163
OG0003387	0.19086	18	-1383.11	19	-1382.06	0.1818	0.92169	2.64114	2.09996	1	0.147303
OG0003350	0.22143	18	-1527.74	19	-1527.66	0.21674	0.27389	5.75712	0.166486	1	0.683254
OG0003388	0.1832	18	-2164.34	19	-2163.13	0.19216	0.06288	3.90838	2.41001	1	0.120562
OG0003362	0.32392	18	-1877.03	19	-1875.69	0.33909	0.07219	3.70273	2.69385	1	0.100736
OG0003349	0.1085	18	-1513.45	19	-1513.34	0.10652	0.16668	2.5031	0.219056	1	0.63976
OG0003312	0.03911	18	-5357.98	19	-5356.55	0.04154	0.01408	5.11428	2.85477	1	0.0911034
OG0003373	0.12185	18	-3684.5	19	-3684.41	0.12014	0.14183	4.10176	0.175748	1	0.675053
OG0003393	0.05189	18	-2294.99	19	-2294.67	0.04935	0.08719	3.03719	0.631102	1	0.426951
OG0003354	0.13321	18	-1914.13	19	-1912.16	0.14422	0.02612	2.9813	3.93138	1	0.047393
OG0003394	0.06231	18	-3740.37	19	-3740.37	0.06249	0.05998	4.34741	0.007396	1	0.931466
OG0003364	0.1381	18	-2322.36	19	-2322.33	0.13892	0.11678	2.33843	0.043868	1	0.834099
OG0003385	0.03496	18	-2263.55	19	-2262.26	0.03721	0.0001	5.4757	2.57832	1	0.108337
OG0003402	0.07255	18	-2478.9	19	-2478.65	0.07443	0.04355	6.51524	0.506544	1	0.476639
OG0003404	0.11583	18	-2587.41	19	-2587.34	0.11778	0.09987	5.53642	0.153978	1	0.694762
OG0003372	0.06097	18	-3161.44	19	-3160.65	0.0622	0.0001	1.94375	1.57944	1	0.208842
OG0003313	0.04507	18	-5369.08	19	-5366.16	0.04825	0.0001	2.18177	5.84405	1	0.0156298
OG0003400	0.13156	18	-4837.37	19	-4829.65	0.11532	0.33344	3.65402	15.4421	1	8.5074e-05
OG0003386	0.147	18	-3088.41	19	-3088.29	0.14485	0.18572	4.03873	0.252156	1	0.615561
OG0003339	0.16414	18	-3313.12	19	-3310.15	0.17518	0.01078	2.57727	5.93156	1	0.0148721
OG0003381	0.05087	18	-2354.61	19	-2354.08	0.04849	0.10062	4.93088	1.06501	1	0.302074
OG0003383	0.03094	18	-2969.17	19	-2968.57	0.02953	0.0594	3.41521	1.2072	1	0.271888
OG0003321	0.19088	18	-8203.16	19	-8203.04	0.19284	0.17012	4.59251	0.227644	1	0.633276
OG0003319	0.06336	18	-4599.28	19	-4598.74	0.06503	0.02481	2.07259	1.09584	1	0.295181
OG0003352	0.0159	18	-3173.06	19	-3170.95	0.01428	0.07615	4.81601	4.20801	1	0.0402335
OG0003390	0.03957	18	-4192.65	19	-4192.4	0.03841	0.05604	2.33536	0.501032	1	0.479047
OG0003397	0.36535	18	-5174.91	19	-5171.94	0.34603	0.85097	3.24401	5.94362	1	0.0147707
OG0003374	0.11347	18	-5791.28	19	-5788.75	0.11992	0.04921	5.34012	5.06789	1	0.0243731
OG0003370	0.02608	18	-2138.2	19	-2138.16	0.0253	0.03611	4.68074	0.09515	1	0.757729
OG0003356	0.15347	18	-4347.55	19	-4347.42	0.15562	0.12836	4.04247	0.248972	1	0.6178
OG0003368	0.09555	18	-3777.08	19	-3776.06	0.08984	0.15506	4.91338	2.05271	1	0.151936
OG0003336	0.03334	18	-5027.88	19	-5024.52	0.03632	0.0001	9.13381	6.72834	1	0.00948928
OG0003343	0.03516	18	-3772.11	19	-3769.15	0.038	0.0001	5.08215	5.93412	1	0.0148505
OG0003380	0.16987	18	-5231.32	19	-5231.31	0.17085	0.16155	4.81438	0.034932	1	0.851738
OG0003345	0.04831	18	-5982.8	19	-5982.05	0.05	0.02517	2.34614	1.50275	1	0.220248
OG0003429	0.09082	18	-1996.1	19	-1995.55	0.08638	0.15737	4.48029	1.10065	1	0.294124
OG0003363	0.1611	18	-4582.34	19	-4580.21	0.17094	0.07304	5.3602	4.25246	1	0.0391935
OG0003424	0.05354	18	-1652.53	19	-1652.29	0.05072	0.08079	4.03853	0.485336	1	0.486015
OG0003341	0.369	18	-7650.96	19	-7648.49	0.38583	0.20883	3.17515	4.94008	1	0.0262408
OG0003353	0.06776	18	-5718.68	19	-5717.8	0.06549	0.11206	1.9927	1.75397	1	0.185378
OG0003417	0.03719	18	-1404.87	19	-1403.43	0.04072	0.0001	5.55621	2.87448	1	0.0899943
OG0003318	0.18398	18	-6271.5	19	-6270.97	0.17948	0.25589	4.49439	1.0488	1	0.305784
OG0003405	0.11348	18	-7142.15	19	-7140.61	0.10894	0.17718	5.05271	3.08589	1	0.0789742
OG0003420	0.0993	18	-1167.43	19	-1167.43	0.09892	0.10846	3.71218	0.005922	1	0.93866
OG0003444	0.30132	18	-2887.54	19	-2885.09	0.27979	0.64616	2.32372	4.88624	1	0.0270716
OG0003478	0.02544	18	-2750.62	19	-2750.59	0.02503	0.03094	5.67171	0.069304	1	0.792353
OG0003449	0.04934	18	-2213.34	19	-2213.09	0.05115	0.03317	4.75883	0.488276	1	0.484697
OG0003501	0.17171	18	-2321.06	19	-2320.96	0.16967	0.22029	3.05316	0.202822	1	0.652453
OG0003507	0.11727	18	-2871.16	19	-2869.87	0.11062	0.22621	4.47381	2.57773	1	0.108377
OG0003460	0.06311	18	-2116.81	19	-2115.73	0.07018	0.01902	4.64885	2.15871	1	0.141764
OG0003407	0.00874	18	-3251.08	19	-3250.59	0.00772	0.01867	6.26212	0.973914	1	0.323706
OG0003518	0.01517	18	-1995.43	19	-1995.18	0.01619	0.00813	2.31957	0.50404	1	0.47773
OG0003451	0.00566	18	-2486.24	19	-2485.59	0.00624	0.0001	4.48585	1.31162	1	0.252102
OG0003434	0.09996	18	-2700.67	19	-2700.67	0.1005	0.09434	4.82056	0.016376	1	0.898174
OG0003491	0.40582	18	-2206.54	19	-2206.52	0.40436	0.52094	2.5706	0.05034	1	0.822473
OG0003428	0.05642	18	-2179.61	19	-2179.03	0.0542	0.1669	2.78166	1.17541	1	0.278292
OG0003480	0.08731	18	-2424.23	19	-2423.68	0.08374	0.15032	5.49532	1.08884	1	0.296727
OG0003463	0.07578	18	-2384.71	19	-2384.56	0.07407	0.10796	5.24518	0.295766	1	0.586549
OG0003476	0.0544	18	-2138.77	19	-2138.7	0.05335	0.06954	3.92091	0.134914	1	0.71339
OG0003472	0.04276	18	-1925.51	19	-1925.46	0.04335	0.03117	4.12052	0.099932	1	0.751911
OG0003535	0.05917	18	-1361.15	19	-1361.02	0.06072	0.03552	3.26663	0.267072	1	0.605303
OG0003342	0.07098	18	-5112.34	19	-5110.65	0.06648	0.15737	2.68486	3.37614	1	0.0661467
OG0003413	0.18407	18	-3897.45	19	-3897.17	0.17986	0.23181	4.12106	0.558922	1	0.454695
OG0003369	0.17583	18	-6885.09	19	-6884.58	0.17953	0.12901	4.13627	1.02357	1	0.311673
OG0003466	0.05559	18	-3822.16	19	-3820.59	0.05066	0.109	6.18602	3.13645	1	0.0765602
OG0003433	0.15651	18	-4364.01	19	-4363.15	0.14977	0.22798	3.9865	1.71161	1	0.190777
OG0003409	0.17558	18	-2500.93	19	-2499.78	0.18408	0.06833	2.37758	2.31088	1	0.128471
OG0003509	0.0871	18	-2207.3	19	-2206.87	0.09019	0.05104	2.95535	0.868656	1	0.351328
OG0003453	0.14011	18	-5270.79	19	-5270.34	0.14287	0.09828	2.49416	0.88762	1	0.346123
OG0003532	0.13451	18	-3136.79	19	-3136.21	0.12969	0.20753	3.30713	1.15753	1	0.281979
OG0003494	0.02537	18	-2307.82	19	-2307.74	0.02638	0.01524	4.86611	0.162966	1	0.68644
OG0003482	0.0783	18	-2657.62	19	-2654.56	0.06973	0.21413	6.56655	6.12874	1	0.0133001
OG0003533	0.05954	18	-2611.25	19	-2611.09	0.06102	0.03494	3.89859	0.317908	1	0.572868
OG0003457	0.0415	18	-2795.05	19	-2794.88	0.04063	0.06077	2.91324	0.341194	1	0.559141
OG0003552	0.01828	18	-2002.91	19	-2002.05	0.01655	0.05553	2.11339	1.71011	1	0.190971
OG0003503	0.26582	18	-5030.18	19	-5030.05	0.26909	0.23323	2.7888	0.249712	1	0.617278
OG0003442	0.05259	18	-2952.7	19	-2952.43	0.0541	0.03135	5.71186	0.540096	1	0.462393
OG0003419	0.04327	18	-3093.33	19	-3092.99	0.04488	0.02041	5.21159	0.675686	1	0.411076
OG0003412	0.27608	18	-3883.3	19	-3883.02	0.28118	0.20566	3.20463	0.549852	1	0.458378
OG0003455	0.38812	18	-6835.49	19	-6835.01	0.37966	0.48492	2.8282	0.963062	1	0.326417
OG0003536	0.54427	18	-3035.08	19	-3035.08	0.54355	0.55512	2.32515	0.001742	1	0.966708
OG0003506	0.02967	18	-1958.91	19	-1958.84	0.02892	0.04471	1.85876	0.137916	1	0.710362
OG0003508	0.10223	18	-2309.54	19	-2298.49	0.0729	0.57285	3.72444	22.0868	1	2.606e-06
OG0003513	0.03044	18	-3273.92	19	-3270.74	0.03413	0.0001	5.62859	6.36043	1	0.0116693
OG0003541	0.16351	18	-3326.23	19	-3324.65	0.15654	0.41811	3.53094	3.1569	1	0.0756064
OG0003498	0.16911	18	-2581.77	19	-2581.46	0.16417	0.26991	3.82065	0.602202	1	0.437739
OG0003415	0.09292	18	-2854.78	19	-2853.93	0.0888	0.1821	2.64545	1.70589	1	0.191519
OG0003522	0.23592	18	-2883.64	19	-2883.64	0.2363	0.2305	2.01356	0.002134	1	0.963155
OG0003519	0.12895	18	-3109.44	19	-3109.35	0.12647	0.14838	4.17933	0.170592	1	0.679586
OG0003547	0.02939	18	-2433.57	19	-2433.57	0.02961	0.02675	7.53118	0.017178	1	0.895724
OG0003422	0.09844	18	-3949.57	19	-3949.02	0.09232	0.12462	2.63288	1.09507	1	0.295351
OG0003543	0.01596	18	-3225.89	19	-3225.88	0.01614	0.01455	9.82616	0.018508	1	0.891786
OG0003514	0.00957	18	-3601.92	19	-3601.91	0.0095	0.01065	5.82649	0.011422	1	0.914889
OG0003537	0.04151	18	-3231.93	19	-3231.46	0.04315	0.02365	3.14903	0.93224	1	0.334282
OG0003540	0.05722	18	-2512.06	19	-2512.06	0.05732	0.05601	5.07551	0.00136	1	0.970582
OG0003432	0.28757	18	-5215.46	19	-5215.03	0.28011	0.36029	3.89149	0.847416	1	0.357284
OG0003445	0.13143	18	-2634.55	19	-2634.54	0.13205	0.12426	3.35112	0.015786	1	0.900015
OG0003378	0.07385	18	-7272.16	19	-7271.45	0.07617	0.05268	3.79836	1.41523	1	0.23419
OG0003511	0.18596	18	-2194.75	19	-2193.67	0.17307	0.36868	2.90346	2.16541	1	0.141147
OG0003408	0.11974	18	-4462.39	19	-4462.39	0.11994	0.11736	5.54402	0.003494	1	0.952864
OG0003488	0.08144	18	-2350.57	19	-2350.31	0.08235	0.0001	4.57356	0.51837	1	0.471538
OG0003477	0.18681	18	-5327.03	19	-5323.73	0.20041	0.09135	4.08104	6.60479	1	0.0101705
OG0003438	0.39542	18	-4255.8	19	-4255.11	0.41351	0.26288	2.14149	1.38434	1	0.239363
OG0003462	0.06446	18	-5530.09	19	-5529.31	0.06172	0.09563	4.24141	1.55634	1	0.212203
OG0003529	0.01032	18	-4273.31	19	-4273.06	0.01078	0.00555	7.18139	0.492606	1	0.482767
OG0003531	0.12603	18	-5079.29	19	-5072.42	0.11398	0.36097	2.5487	13.7406	1	0.000209866
OG0003430	0.21973	18	-7429.11	19	-7427.47	0.21066	0.32285	2.91815	3.28776	1	0.0697984
OG0003525	0.12203	18	-4531.01	19	-4527.65	0.11146	0.24038	5.5491	6.71989	1	0.00953434
OG0003437	0.09416	18	-4224.38	19	-4223.9	0.09056	0.13881	6.79213	0.97397	1	0.323692
OG0003510	0.10119	18	-4589.34	19	-4587.5	0.10654	0.0485	3.95247	3.68553	1	0.0548866
OG0003461	0.09767	18	-5239.54	19	-5238.87	0.09476	0.14195	2.93862	1.33481	1	0.247952
OG0003471	0.01733	18	-5289.1	19	-5287.51	0.01877	0.00436	3.43986	3.18543	1	0.0742975
OG0003516	0.12431	18	-9137.46	19	-9136.45	0.1213	0.17753	3.23651	2.01377	1	0.155878
OG0003439	0.15237	18	-6014.77	19	-6013.85	0.14693	0.21186	3.32992	1.83525	1	0.175508
OG0003414	0.05058	18	-4993.95	19	-4991.86	0.04678	0.09922	3.76861	4.1929	1	0.0405936
OG0003505	0.0571	18	-4393.1	19	-4392.15	0.05842	0.0001	3.79938	1.90418	1	0.167611
OG0003502	0.07266	18	-4410.87	19	-4407.25	0.0779	0.01562	3.62895	7.2264	1	0.00718393
OG0003544	0.11249	18	-5524.62	19	-5524.33	0.11453	0.08227	3.31768	0.579538	1	0.446493
OG0003337	0.1745	18	-7160.45	19	-7157.76	0.16302	0.32831	4.19394	5.37535	1	0.0204232
OG0003497	0.01679	18	-3563.66	19	-3563.58	0.01619	0.02266	3.97061	0.16652	1	0.683223
OG0003534	0.16334	18	-5413.62	19	-5412.92	0.15738	0.21514	3.62337	1.40014	1	0.236701
OG0003526	0.04293	18	-2786.94	19	-2786.84	0.04224	0.06428	3.34871	0.18476	1	0.667314
OG0003546	0.20478	18	-4028.83	19	-4028.29	0.20045	0.36952	5.38329	1.08518	1	0.297542
OG0003517	0.13551	18	-6125.68	19	-6123.12	0.12622	0.23972	6.44425	5.11467	1	0.0237244
OG0003493	0.15728	18	-6603.92	19	-6603.5	0.15374	0.20058	6.45731	0.858366	1	0.354196
OG0003530	0.03293	18	-6293.67	19	-6292.68	0.03127	0.06902	2.82373	1.96587	1	0.160887
OG0003443	0.04489	18	-4042.49	19	-4042.46	0.04512	0.03536	2.37483	0.05397	1	0.816294
OG0003523	0.27607	18	-3651.51	19	-3650.49	0.28155	0.06618	2.47318	2.04207	1	0.153002
OG0003481	0.15516	18	-7718.67	19	-7718.63	0.15422	0.16616	3.41059	0.075992	1	0.782804
OG0003421	0.01003	18	-3652.38	19	-3651.79	0.0106	0.0001	3.10131	1.18149	1	0.277053
OG0003483	0.18402	18	-7617.87	19	-7617.81	0.18242	0.19809	5.2784	0.119302	1	0.729793
OG0003416	0.0499	18	-3983.14	19	-3983.09	0.04939	0.05854	5.34721	0.104352	1	0.746668
OG0003553	0.28105	18	-3749.98	19	-3749.48	0.28897	0.20126	3.74003	1.00929	1	0.315073
OG0003635	0.32485	18	-1807.5	19	-1807.49	0.32709	0.30212	3.38438	0.024456	1	0.87573
OG0003604	0.27903	18	-2326.23	19	-2324.7	0.29929	0.1376	3.39149	3.05777	1	0.0803521
OG0003606	0.03145	18	-2081.96	19	-2081.89	0.03245	0.02205	3.89221	0.142892	1	0.705423
OG0003454	0.07381	18	-6674.95	19	-6674.92	0.07332	0.08231	2.39437	0.069818	1	0.791602
OG0003470	0.10276	18	-7128.9	19	-7128.69	0.1013	0.14789	3.13433	0.409778	1	0.522082
OG0003662	0.26774	18	-1434.13	19	-1433.6	0.25359	0.43585	2.52212	1.05989	1	0.303241
OG0003602	0.33254	18	-4102.34	19	-4098.5	0.30471	0.67186	2.64372	7.68983	1	0.0055533
OG0003560	0.10789	18	-1676.33	19	-1676.11	0.11082	0.06584	5.56704	0.426308	1	0.513806
OG0003621	0.02745	18	-1937.38	19	-1932.94	0.01972	0.10664	5.01634	8.88565	1	0.0028742
OG0003562	0.17609	18	-930.728	19	-930.572	0.17047	0.30823	4.04983	0.311482	1	0.576772
OG0003599	0.08542	18	-1817.05	19	-1817.02	0.08443	0.09909	4.09058	0.064078	1	0.800163
OG0003487	0.11819	18	-7476.54	19	-7475.38	0.11397	0.18262	5.88963	2.32362	1	0.127424
OG0003628	0.1574	18	-1911.14	19	-1911.12	0.15627	0.17385	2.34011	0.035828	1	0.849871
OG0003601	0.08753	18	-3019.79	19	-3019.79	0.08752	0.08766	2.78502	1.4e-05	1	0.997015
OG0003613	0.05271	18	-2834.85	19	-2833.32	0.04859	0.13071	5.18969	3.04942	1	0.0807659
OG0003595	0.04934	18	-2828.1	19	-2827.91	0.05081	0.02753	4.42827	0.369958	1	0.543027
OG0003576	0.11083	18	-2789.79	19	-2788.41	0.10381	0.29291		2.75908	1	0.0967038
OG0003446	0.01694	18	-4614.6	19	-4614.55	0.01726	0.01276	4.56966	0.090474	1	0.763575
OG0003465	0.09739	18	-4663.46	19	-4661.55	0.09361	0.35107	4.73081	3.8237	1	0.0505326
OG0003618	0.36123	18	-4637.64	19	-4627.98	0.31521	1.12867	3.5122	19.327	1	1.1014e-05
OG0003616	0.13587	18	-5132.76	19	-5132.34	0.13859	0.09193	3.97021	0.827818	1	0.362904
OG0003611	0.16327	18	-4358.48	19	-4357.6	0.15676	0.24079	3.77682	1.77418	1	0.182866
OG0003554	0.03444	18	-1647.53	19	-1647.35	0.03648	0.01999	5.04576	0.358616	1	0.549276
OG0003658	0.43424	18	-2829.24	19	-2829.07	0.44454	0.34481	3.58422	0.35271	1	0.552583
OG0003571	0.14989	18	-3015.74	19	-3013.17	0.15938	0.04548	4.81766	5.14051	1	0.0233738
OG0003608	0.11053	18	-3190.74	19	-3185.64	0.121	0.0001	3.32139	10.1964	1	0.00140714
OG0003406	0.15401	18	-8365.05	19	-8365.05	0.15398	0.15457	4.44019	0.0002	1	0.988717
OG0003610	0.17552	18	-4138.68	19	-4136.19	0.18318	0.04778	2.20212	4.98168	1	0.0256171
OG0003360	0.03804	18	-7432.64	19	-7432.29	0.03903	0.02394	3.51732	0.70811	1	0.400072
OG0003656	0.3331	18	-4149.98	19	-4148.82	0.31967	0.57663	2.78013	2.32044	1	0.127684
OG0003592	0.07402	18	-2877.89	19	-2877.74	0.07203	0.09783	4.16683	0.303928	1	0.58143
OG0003436	0.07716	18	-6855.02	19	-6854.44	0.07943	0.0421	3.15502	1.1556	1	0.282379
OG0003585	0.41402	18	-7392.34	19	-7386.84	0.38325	0.86162	3.06537	11.0095	1	0.000906455
OG0003617	0.04019	18	-4708.26	19	-4708.13	0.03966	0.05167	3.68786	0.25327	1	0.614782
OG0003569	0.01292	18	-2460.02	19	-2459.05	0.01417	0.0001	4.09712	1.94442	1	0.163189
OG0003559	0.04636	18	-3656.29	19	-3656.23	0.04574	0.05541	4.91025	0.106224	1	0.744485
OG0003371	0.10117	18	-7780.34	19	-7776	0.09147	0.21119	3.61281	8.69183	1	0.0031964
OG0003640	0.09635	18	-2847.56	19	-2847.56	0.09624	0.09805	2.60287	0.001368	1	0.970496
OG0003648	0.0086	18	-2046.75	19	-2046.46	0.00754	0.01958	3.88239	0.567624	1	0.451205
OG0003566	0.17492	18	-2022.84	19	-2021.66	0.16729	0.99962	3.23772	2.37546	1	0.123255
OG0003572	0.05744	18	-2606.51	19	-2606.47	0.05671	0.07826	3.27783	0.092844	1	0.760592
OG0003659	0.06927	18	-2638.59	19	-2637.75	0.07272	0.02231	2.73771	1.68045	1	0.194865
OG0003609	0.03232	18	-3685.08	19	-3685.08	0.03237	0.0308	2.02552	0.00217	1	0.962845
OG0003666	0.04511	18	-2607.98	19	-2605.83	0.04026	0.17442	2.99159	4.29974	1	0.0381182
OG0003593	0.23071	18	-3225.52	19	-3221.7	0.20608	0.78257	2.72772	7.64089	1	0.00570598
OG0003637	0.25312	18	-4608.52	19	-4608.1	0.24826	0.34793	2.83463	0.845746	1	0.357759
OG0003625	0.05101	18	-4384.01	19	-4383.67	0.05268	0.03605	5.82616	0.685958	1	0.407543
OG0003654	0.05286	18	-3587.89	19	-3585.98	0.04278	0.17919	3.18833	3.82029	1	0.0506354
OG0003568	0.29358	18	-4341.34	19	-4338.77	0.31055	0.12599	3.67219	5.1417	1	0.0233578
OG0003634	0.08354	18	-3359.43	19	-3349.16	0.06907	0.49459	3.09407	20.5397	1	5.841e-06
OG0003614	0.07736	18	-4812.02	19	-4811.85	0.07589	0.09544	4.11677	0.347292	1	0.55565
OG0003586	0.15131	18	-3244.6	19	-3243.83	0.16388	0.07438	5.1111	1.54461	1	0.213934
OG0003633	0.19794	18	-5167	19	-5165.68	0.18983	0.31872	5.68091	2.63749	1	0.104368
OG0003660	0.08375	18	-4438.2	19	-4437.16	0.07983	0.15168	3.00925	2.09588	1	0.147696
OG0003603	0.09331	18	-6310.87	19	-6310.85	0.09384	0.08631	3.47279	0.045944	1	0.830278
OG0003626	0.10791	18	-4613.57	19	-4612.57	0.11273	0.06374	5.80829	1.98537	1	0.158826
OG0003581	0.05956	18	-3591.27	19	-3591.26	0.05976	0.05522	3.74352	0.01038	1	0.91885
OG0003657	0.0689	18	-3829.65	19	-3829.55	0.0677	0.08375	6.04018	0.201644	1	0.653397
OG0003631	0.06953	18	-6424.53	19	-6424.45	0.06878	0.08024	4.56369	0.157058	1	0.69188
OG0003655	0.04869	18	-3967.16	19	-3966.04	0.04563	0.08255	5.74057	2.24008	1	0.134474
OG0003565	0.17496	18	-4836.84	19	-4836.71	0.1728	0.2069	3.71049	0.262578	1	0.608355
OG0003596	0.05671	18	-4392.16	19	-4391.83	0.05501	0.07807	5.14735	0.665314	1	0.41469
OG0003665	0.12198	18	-4140.34	19	-4138.95	0.11629	0.2214	3.79877	2.78791	1	0.0949778
OG0003639	0.02493	18	-4468.76	19	-4466.44	0.02629	0.0001	6.76624	4.63837	1	0.0312646
OG0003591	0.17453	18	-6306.64	19	-6306.43	0.17706	0.14211	5.12183	0.430002	1	0.511988
OG0003624	0.05184	18	-5427.11	19	-5426.18	0.0486	0.09789	3.70895	1.85329	1	0.173401
OG0003557	0.06561	18	-4281.64	19	-4281.63	0.06577	0.06351	2.95839	0.00388	1	0.950332
OG0003652	0.01902	18	-3520.94	19	-3520.19	0.01997	0.0001	2.57994	1.48554	1	0.222909
OG0003650	0.12889	18	-3877.47	19	-3876.74	0.13383	0.08248	6.74352	1.4708	1	0.225219
OG0003668	0.04397	18	-4320.09	19	-4320.04	0.04458	0.03707	2.3443	0.089306	1	0.765061
OG0003647	0.03947	18	-5347.2	19	-5347.17	0.0391	0.04312	5.72169	0.054096	1	0.816083
OG0003661	0.25191	18	-7251.98	19	-7250.97	0.24266	0.33975	3.51233	2.01982	1	0.155258
OG0003555	0.10104	18	-7416.32	19	-7416.14	0.10249	0.0799	4.31327	0.360266	1	0.548359
OG0003567	0.08212	18	-5276.01	19	-5272.65	0.0742	0.15968	6.88134	6.71402	1	0.00956581
OG0003687	0.11171	18	-1682.8	19	-1682.66	0.11493	0.08337	4.71999	0.281114	1	0.595972
OG0003587	0.05229	18	-4690.63	19	-4690.11	0.05092	0.08549	2.37489	1.04101	1	0.307586
OG0003646	0.09543	18	-6694.39	19	-6694.35	0.09621	0.08405	4.56118	0.087414	1	0.767491
OG0003723	0.14579	18	-2127.09	19	-2127	0.14323	0.17382	4.26554	0.186274	1	0.666036
OG0003694	0.33454	18	-2228.95	19	-2228.63	0.34125	0.15647	3.90144	0.644204	1	0.422193
OG0003642	0.01766	18	-5640.81	19	-5639.31	0.01572	0.04307		2.9928	1	0.0836355
OG0003698	0.03405	18	-3397.14	19	-3397.12	0.0343	0.03016	2.75158	0.02879	1	0.865265
OG0003683	0.09524	18	-1776.36	19	-1776.34	0.09415	0.1055	3.81617	0.041778	1	0.838044
OG0003709	0.12087	18	-2445.9	19	-2443.04	0.13291	0.01993	3.31116	5.73068	1	0.016671
OG0003632	0.04205	18	-4188.59	19	-4188.58	0.0421	0.04102	4.08105	0.001112	1	0.973398
OG0003653	0.11499	18	-5504.18	19	-5501.49	0.1072	0.28446	2.81352	5.38215	1	0.0203437
OG0003680	0.08676	18	-3288.9	19	-3288.19	0.08364	0.136	2.48069	1.42425	1	0.232705
OG0003688	0.10137	18	-3625.32	19	-3624.4	0.10578	0.05688	3.14319	1.82613	1	0.176585
OG0003636	0.20732	18	-6047.03	19	-6046.94	0.20614	0.2567	3.41628	0.178968	1	0.672262
OG0003643	0.14824	18	-8101.21	19	-8101.11	0.14686	0.16756	4.5638	0.211248	1	0.645791
OG0003649	0.06149	18	-4623.54	19	-4623.36	0.06291	0.04089	3.20999	0.341916	1	0.558725
OG0003690	0.03455	18	-3053.41	19	-3051.77	0.03663	0.0001	4.47396	3.29569	1	0.0694618
OG0003711	0.18961	18	-4528.2	19	-4528.18	0.18856	0.2039	4.28446	0.047904	1	0.826751
OG0003664	0.31716	18	-8979.79	19	-8978.29	0.30685	0.46204	3.53926	3.00001	1	0.083264
OG0003706	0.08472	18	-3079.38	19	-3079.12	0.08789	0.05594	7.12621	0.53883	1	0.462918
OG0003708	0.06214	18	-3829.41	19	-3828.95	0.06033	0.09563	2.80571	0.92276	1	0.336751
OG0003692	0.22664	18	-6040.29	19	-6039.39	0.21802	0.31691	4.29309	1.78694	1	0.181299
OG0003712	0.04189	18	-2311.05	19	-2310.41	0.03858	0.08255	2.68624	1.26938	1	0.259882
OG0003684	0.19966	18	-4274.28	19	-4274.24	0.20135	0.18632	4.22315	0.062344	1	0.802829
OG0003675	0.08515	18	-3261.44	19	-3261.44	0.08494	0.0943	2.37683	0.014802	1	0.903166
OG0003710	0.09907	18	-4330.81	19	-4330.06	0.09548	0.17678	4.38323	1.49766	1	0.221032
OG0003702	0.06791	18	-2294.6	19	-2294.54	0.06891	0.05641	4.44469	0.111344	1	0.738619
OG0003671	0.0928	18	-5579.53	19	-5577.8	0.08744	0.1558	5.60662	3.44479	1	0.0634516
OG0003705	0.01852	18	-1580.58	19	-1580.54	0.0181	0.02517	2.76459	0.083226	1	0.772972
OG0003763	0.23662	18	-1538.82	19	-1538.2	0.24839	0.11626	6.12798	1.24353	1	0.264793
OG0003724	0.01813	18	-1337.27	19	-1336.84	0.01983	0.0001	5.50047	0.85911	1	0.353988
OG0003686	0.04687	18	-4995.02	19	-4994.87	0.04594	0.06037	4.75433	0.304056	1	0.581351
OG0003700	0.09193	18	-4419.91	19	-4419.8	0.09048	0.1161	3.91835	0.20942	1	0.647222
OG0003685	0.20455	18	-9887.24	19	-9885.02	0.19726	0.3186	3.19161	4.43735	1	0.0351608
OG0003719	0.15214	18	-5765.08	19	-5763.91	0.14558	0.21559	3.24462	2.33863	1	0.1262
OG0003674	0.13219	18	-3055.46	19	-3055.15	0.13625	0.08841	1.22097	0.618866	1	0.431469
OG0003760	0.008	18	-1611.14	19	-1610.87	0.00877	0.0001	4.68388	0.53494	1	0.464537
OG0003722	0.35272	18	-7049.36	19	-7044.01	0.32602	0.73641	3.45115	10.7129	1	0.00106393
OG0003734	0.00468	18	-1053.2	19	-1053.09	0.00525	0.0001	2.66462	0.22497	1	0.635279
OG0003747	0.01899	18	-1726.57	19	-1725.8	0.02023	0.0001	5.74227	1.52846	1	0.216343
OG0003670	0.0559	18	-6068.65	19	-6068.63	0.05634	0.05014	5.11925	0.056826	1	0.811585
OG0003651	0.03484	18	-6651.03	19	-6649.76	0.03258	0.07362	3.98876	2.54268	1	0.110806
OG0003682	0.06415	18	-5306.52	19	-5306.1	0.06194	0.08565	5.21567	0.847738	1	0.357193
OG0003701	0.29773	18	-5026.61	19	-5026.36	0.30281	0.24184	2.48464	0.497488	1	0.480606
OG0003750	0.25089	18	-2037.5	19	-2037.07	0.24166	0.39238	5.09064	0.866768	1	0.351852
OG0003707	0.05576	18	-4857.53	19	-4856.45	0.05922	0.02196	3.96365	2.17277	1	0.140473
OG0003727	0.08679	18	-1524.81	19	-1522.8	0.09294	0.0001	1.53186	4.02891	1	0.0447267
OG0003767	0.07518	18	-4238.33	19	-4237.8	0.0727	0.11127	4.60819	1.06979	1	0.300992
OG0003691	0.07689	18	-7056.31	19	-7056.11	0.07562	0.0938	4.94409	0.399048	1	0.527581
OG0003721	0.05314	18	-6017.12	19	-6016.19	0.0555	0.03107	6.47341	1.85525	1	0.173174
OG0003736	0.0001	18	-792.536	19	-792.536	0.0001	0.0001	2.85358	0	1	1
OG0003764	0.0514	18	-3326.94	19	-3325.3	0.055	0.01667	4.66884	3.29371	1	0.0695459
OG0003740	0.03113	18	-2516.19	19	-2516.13	0.0317	0.02538	3.79986	0.124996	1	0.723678
OG0003679	0.0637	18	-6014.86	19	-6014.7	0.06462	0.05074	2.34706	0.321908	1	0.570463
OG0003733	0.02832	18	-1773.4	19	-1772.53	0.0297	0.0001	4.81124	1.74192	1	0.186896
OG0003757	0.10501	18	-5363.62	19	-5362.79	0.10097	0.16226	5.55471	1.65299	1	0.198553
OG0003716	0.09849	18	-7202.73	19	-7200.44	0.09237	0.177	4.41778	4.5975	1	0.0320187
OG0003738	0.25293	18	-3034.91	19	-3034.91	0.25337	0.24956	3.39022	0.001924	1	0.965013
OG0003745	0.01132	18	-3914.14	19	-3913.9	0.01083	0.01931	5.13062	0.486776	1	0.485369
OG0003754	0.06297	18	-4583.04	19	-4582.39	0.06063	0.09912	1.97099	1.29156	1	0.25576
OG0003748	0.04042	18	-4333.34	19	-4314.71	0.02173	0.21268	5.32282	37.254	1	1e-09
OG0003742	0.10086	18	-3844.12	19	-3843.4	0.09548	0.16661	7.57906	1.43964	1	0.230198
OG0003758	0.10939	18	-8236.87	19	-8236.48	0.10745	0.13743	3.5969	0.768376	1	0.38072
OG0003749	0.11849	18	-4560	19	-4559.49	0.11523	0.16753	3.76347	1.01221	1	0.314373
OG0003725	0.07408	18	-6341.35	19	-6340.78	0.07639	0.05261	3.61915	1.13256	1	0.28723
OG0003741	0.17027	18	-4753.56	19	-4752.83	0.16454	0.24454	4.79029	1.47067	1	0.225239
OG0003761	0.11343	18	-8635.89	19	-8633.28	0.10777	0.18045	3.18628	5.21373	1	0.0224092
OG0003729	0.17953	18	-4804.23	19	-4803.66	0.1755	0.27205	3.26389	1.13558	1	0.286588
OG0003798	0.14451	18	-1580.9	19	-1580.79	0.14165	0.18946	4.95918	0.209802	1	0.646923
OG0003799	0.1092	18	-1510.22	19	-1508.54	0.09581	0.25957	3.96961	3.35642	1	0.0669435
OG0003769	0.12674	18	-2264.05	19	-2263.65	0.13083	0.07571	4.67794	0.80019	1	0.371037
OG0003813	0.03051	18	-1423.8	19	-1423.79	0.03082	0.02599	2.60231	0.025174	1	0.873934
OG0003704	0.03321	18	-5924.58	19	-5923.29	0.0351	0.0092	2.35601	2.58816	1	0.107665
OG0003811	0.01407	18	-1389.64	19	-1389.4	0.01478	0.0001	5.15503	0.473924	1	0.491187
OG0003828	0.10667	18	-1090.82	19	-1090.6	0.10984	0.05146	3.6622	0.458124	1	0.498502
OG0003735	0.06164	18	-4594.44	19	-4593.51	0.06426	0.02247	7.53632	1.86648	1	0.171879
OG0003801	0.03275	18	-1248.12	19	-1246	0.02611	0.11842	3.9354	4.24925	1	0.0392678
OG0003788	0.10222	18	-1682.81	19	-1682.69	0.10512	0.0704	2.15029	0.235256	1	0.627654
OG0003833	0.52693	18	-1969.06	19	-1968.43	0.55136	0.31761	2.82575	1.27421	1	0.258979
OG0003824	0.34123	18	-2359.59	19	-2359.56	0.33782	0.37058	3.52884	0.05494	1	0.81468
OG0003821	0.11472	18	-1257.54	19	-1256.15	0.12564	0.02727	5.77612	2.79654	1	0.0944679
OG0003805	0.02631	18	-1885.91	19	-1884.88	0.02849	0.0001	5.48693	2.05306	1	0.1519
OG0003775	0.16284	18	-2110.82	19	-2108.14	0.14661	0.42762	2.44997	5.34732	1	0.0207542
OG0003803	0.17283	18	-1771.31	19	-1769.12	0.16076	1.08781	2.47143	4.3843	1	0.0362713
OG0003797	0.29932	18	-4840.23	19	-4840.21	0.29769	0.31704	2.45958	0.042084	1	0.83746
OG0003800	0.07055	18	-4620.58	19	-4620.25	0.06874	0.09924	6.27489	0.675292	1	0.411213
OG0003819	0.10379	18	-2380.8	19	-2378.94	0.10804	0.0001	5.34383	3.70724	1	0.0541768
OG0003715	0.06201	18	-7711.45	19	-7711.23	0.06304	0.04458	3.91104	0.436242	1	0.508942
OG0003776	0.0946	18	-3445.33	19	-3445.31	0.09384	0.10488	4.00723	0.051204	1	0.820981
OG0003838	0.0044	18	-1863.75	19	-1863.52	0.00496	0.0001	4.44185	0.464206	1	0.495665
OG0003781	0.05601	18	-3556.04	19	-3555.22	0.05117	0.0962	3.48929	1.64057	1	0.200248
OG0003814	0.17734	18	-5433.54	19	-5433.5	0.1786	0.16684	4.03417	0.061782	1	0.803701
OG0003752	0.01829	18	-5462.06	19	-5461.12	0.01706	0.03644	3.97721	1.89075	1	0.169118
OG0003779	0.14353	18	-4147.22	19	-4147.22	0.14389	0.13979	5.56247	0.00631	1	0.936686
OG0003816	0.12993	18	-4598.91	19	-4598.82	0.12856	0.1506	4.34328	0.185258	1	0.666893
OG0003777	0.10606	18	-3685.03	19	-3684.98	0.10493	0.12125	7.21053	0.11258	1	0.737226
OG0003841	0.04147	18	-3339.64	19	-3338.16	0.03788	0.10256	2.8806	2.96159	1	0.0852641
OG0003806	0.13306	18	-4960.35	19	-4959.62	0.13578	0.07212	3.94339	1.45832	1	0.227197
OG0003830	0.25079	18	-3981.83	19	-3981.78	0.24818	0.27416	4.31698	0.094314	1	0.758763
OG0003815	0.13906	18	-2780.33	19	-2777.73	0.12787	0.48746	2.72637	5.19767	1	0.0226172
OG0003743	0.03614	18	-6871.09	19	-6870.71	0.03721	0.02034	2.37876	0.77001	1	0.380214
OG0003822	0.02007	18	-1810.19	19	-1808.69	0.02236	0.0001	2.46118	2.99112	1	0.0837225
OG0003844	0.03465	18	-2944.33	19	-2944.25	0.03605	0.0264	5.87448	0.167854	1	0.682026
OG0003786	0.08284	18	-3392.58	19	-3392.58	0.0826	0.08551	4.66379	0.006384	1	0.936317
OG0003772	0.07318	18	-4278.23	19	-4274.73	0.06767	0.18647	3.07296	7.00232	1	0.00814041
OG0003794	0.15307	18	-7780.13	19	-7774.51	0.14075	0.29949	2.67815	11.2507	1	0.000795942
OG0003790	0.08453	18	-5551.12	19	-5544.88	0.09081	0.0001	4.86625	12.4856	1	0.00041009
OG0003774	0.11476	18	-4299.12	19	-4294.73	0.10273	0.25302	5.98846	8.79119	1	0.00302689
OG0003753	0.04231	18	-6993.66	19	-6993.54	0.0431	0.03339	4.66675	0.229568	1	0.631844
OG0003826	0.0167	18	-3751.96	19	-3750.81	0.01773	0.0001	3.50818	2.30641	1	0.128841
OG0003812	0.03619	18	-5347.09	19	-5347	0.03674	0.0294	6.50457	0.165526	1	0.684119
OG0003784	0.02385	18	-5081.45	19	-5081.42	0.02361	0.02733	5.13365	0.062812	1	0.802105
OG0003842	0.09118	18	-4162.28	19	-4162.27	0.09058	0.10081	3.25578	0.022552	1	0.880628
OG0003825	0.05491	18	-6090.41	19	-6090.02	0.05361	0.07576	3.8707	0.791506	1	0.373645
OG0003785	0.07129	18	-5452.95	19	-5451.74	0.06786	0.11216	4.93301	2.43144	1	0.118924
OG0003840	0.05138	18	-4809.09	19	-4807.92	0.05409	0.01502	4.36127	2.3518	1	0.125138
OG0003843	0.25164	18	-5464.61	19	-5461.77	0.26481	0.11234	2.82076	5.69087	1	0.0170534
OG0003834	0.04877	18	-5864.18	19	-5860.55	0.04459	0.11786	4.63443	7.25872	1	0.00705577
OG0003837	0.06919	18	-3791.87	19	-3788.61	0.05977	0.21713	3.73795	6.50689	1	0.0107457
OG0003939	0.03444	18	-1317.45	19	-1316.84	0.03781	0.0001	3.76739	1.22778	1	0.26784
OG0003789	0.15622	18	-5834.92	19	-5832.56	0.14747	0.33738	4.52309	4.73117	1	0.0296207
OG0003793	0.21544	18	-8409	19	-8407.94	0.20931	0.31033	5.08435	2.10741	1	0.146587
OG0003937	0.13259	18	-1643.96	19	-1641.61	0.14361	0.0001	3.84664	4.70558	1	0.0300649
OG0003872	0.23875	18	-2081.03	19	-2080.73	0.24226	0.10235	4.12437	0.601748	1	0.437912
OG0003846	0.00852	18	-2608.47	19	-2608.13	0.00886	0.0001	5.39206	0.67531	1	0.411206
OG0003927	0.10403	18	-1552.95	19	-1551.91	0.11157	0.02813	3.23963	2.08469	1	0.148782
OG0003756	0.17627	18	-8347.99	19	-8345.87	0.16791	0.29255	4.25037	4.24426	1	0.0393831
OG0003913	0.17299	18	-3154.03	19	-3153.48	0.17932	0.12027	4.19845	1.08551	1	0.297469
OG0003961	0.01305	18	-1241.86	19	-1241.4	0.01417	0.0001	4.26959	0.919444	1	0.337621
OG0003946	0.10369	18	-1498.15	19	-1498.12	0.10534	0.08733	3.56038	0.075424	1	0.783597
OG0003932	0.13114	18	-2017.5	19	-2014.21	0.14678	0.02779	3.60544	6.5788	1	0.01032
OG0003938	0.15778	18	-2263.74	19	-2263.7	0.15982	0.13508	3.3024	0.084846	1	0.770835
OG0003920	0.1087	18	-1281.72	19	-1280.56	0.09735	0.84186	2.18097	2.31858	1	0.127837
OG0003990	0.06266	18	-697.982	19	-695.525	0.04401	0.22859	5.70855	4.91366	1	0.0266451
OG0003845	0.10091	18	-5335.2	19	-5334.28	0.10438	0.06061	5.02983	1.85094	1	0.173674
OG0003909	0.02636	18	-1892.84	19	-1892.58	0.02523	0.06249	3.30681	0.521372	1	0.470257
OG0004008	0.05803	18	-1782.1	19	-1780.61	0.04994	0.11606	4.38832	2.97748	1	0.0844304
OG0003850	0.11427	18	-4385.62	19	-4384.82	0.11077	0.19216	3.91432	1.59461	1	0.206669
OG0003854	0.24321	18	-3714.49	19	-3714.24	0.23752	0.31838	4.09873	0.500896	1	0.479107
OG0003871	0.10127	18	-2486.53	19	-2486.35	0.09679	0.14467	3.17396	0.358068	1	0.549581
OG0003853	0.07742	18	-4087.46	19	-4084.99	0.08284	0.02049	5.27554	4.9243	1	0.0264815
OG0003851	0.05278	18	-3251.63	19	-3250.81	0.04971	0.10441	4.63734	1.64129	1	0.200148
OG0003865	0.0255	18	-2145.94	19	-2144.82	0.0276	0.0001	3.53549	2.23621	1	0.134811
OG0003935	0.07688	18	-2635.52	19	-2634.87	0.08052	0.03091	2.34763	1.31599	1	0.251313
OG0003960	0.00103	18	-1708.79	19	-1708.72	0.00112	0.0001	5.82152	0.141058	1	0.707231
OG0003944	0.12008	18	-2449.96	19	-2445.34	0.13056	0.0001	5.34223	9.23274	1	0.00237725
OG0003954	0.34972	18	-3166.33	19	-3165.43	0.33465	0.57736	3.9396	1.80505	1	0.179103
OG0003778	0.03593	18	-6155.1	19	-6154.19	0.03434	0.07355	1.92274	1.81663	1	0.177715
OG0003858	0.00855	18	-2007.2	19	-2006.84	0.00922	0.0001	5.63104	0.728116	1	0.393495
OG0003953	0.32692	18	-2687.73	19	-2687.57	0.31796	0.40742	4.06347	0.31204	1	0.576431
OG0003926	0.23022	18	-3503.04	19	-3502.94	0.22669	0.28391	2.85365	0.203042	1	0.652277
OG0003967	0.05382	18	-3363.51	19	-3363.21	0.05493	0.03179	2.03545	0.593022	1	0.441253
OG0003888	0.01169	18	-3414.23	19	-3413.44	0.01224	0.0001	5.29466	1.57509	1	0.20947
OG0003877	0.22623	18	-4585.8	19	-4585.63	0.22235	0.26179	2.42495	0.327256	1	0.567279
OG0003875	0.2481	18	-2611.89	19	-2611.26	0.23537	0.38978	3.69275	1.25398	1	0.262794
OG0003880	0.12572	18	-4015.37	19	-4015.34	0.1266	0.11583	2.56197	0.058868	1	0.808294
OG0003895	0.05358	18	-3004.66	19	-3004.51	0.05215	0.06764	5.02596	0.303634	1	0.581613
OG0003903	0.07087	18	-4263.12	19	-4261.79	0.06689	0.13985	4.34863	2.66765	1	0.102407
OG0003904	0.03403	18	-3466.04	19	-3466	0.03451	0.02583	2.50385	0.080312	1	0.776875
OG0004006	0.02195	18	-1613.62	19	-1610.45	0.01791	0.17518	3.9088	6.32513	1	0.0119039
OG0004011	0.14571	18	-2891.25	19	-2891.23	0.14462	0.15965	3.07147	0.04702	1	0.828332
OG0003874	0.13262	18	-3236.9	19	-3236.51	0.12959	0.21266	1.80934	0.765782	1	0.381525
OG0003957	0.23622	18	-2795.27	19	-2795.24	0.23802	0.20568	2.50769	0.067154	1	0.795527
OG0003925	0.08756	18	-4093.33	19	-4092.8	0.08503	0.13389	3.36116	1.06149	1	0.302876
OG0003870	0.07066	18	-2550.65	19	-2548.77	0.07598	0.01504	4.19658	3.75208	1	0.0527418
OG0003968	0.1373	18	-3429.55	19	-3429.53	0.13817	0.12633	5.17706	0.043798	1	0.83423
OG0003911	0.02741	18	-2129.49	19	-2121.97	0.01966	0.34592	3.44693	15.0284	1	0.000105907
OG0003918	0.04296	18	-5096.93	19	-5096.76	0.04188	0.05235	4.17954	0.354318	1	0.551679
OG0004010	0.11009	18	-2704.73	19	-2704.73	0.11	0.11201	3.54018	0.000688	1	0.979074
OG0003922	0.15067	18	-5861.24	19	-5860.44	0.14554	0.21803	5.75929	1.59059	1	0.207242
OG0004016	0.10976	18	-1840.95	19	-1840.32	0.11475	0.04496	2.25839	1.27508	1	0.258815
OG0003991	0.03431	18	-2951.88	19	-2949.94	0.03132	0.08591	5.62323	3.88486	1	0.0487234
OG0003892	0.08272	18	-2226.1	19	-2225.49	0.07891	0.14469	3.4135	1.21469	1	0.270406
OG0003919	0.03951	18	-2304.67	19	-2304.18	0.03676	0.0767	3.84889	0.97152	1	0.324301
OG0003941	0.1051	18	-4976.99	19	-4975.77	0.1002	0.16653	4.92241	2.44319	1	0.118036
OG0003952	0.13912	18	-4575.27	19	-4573.47	0.14591	0.0688	3.19375	3.59646	1	0.0579028
OG0003928	0.08909	18	-4487.38	19	-4487.32	0.0881	0.10293	5.97929	0.107088	1	0.743484
OG0003901	0.03637	18	-3808.82	19	-3808.76	0.03691	0.03133	6.41379	0.10738	1	0.743147
OG0003989	0.1233	18	-2950.93	19	-2950.91	0.12452	0.10967	3.15647	0.048936	1	0.824925
OG0003896	0.36669	18	-2935.64	19	-2935.25	0.35435	0.53701	3.426	0.777414	1	0.377933
OG0003889	0.08727	18	-3145.86	19	-3145.59	0.08937	0.0593	4.08114	0.537246	1	0.463576
OG0003934	0.2329	18	-5850.41	19	-5850.4	0.23232	0.23946	4.30456	0.009602	1	0.92194
OG0003992	0.2452	18	-3505.84	19	-3505.8	0.24708	0.21787	3.06301	0.077524	1	0.780681
OG0003917	0.08409	18	-4828.41	19	-4827.92	0.08178	0.12705	2.81962	0.986508	1	0.320597
OG0003956	0.21935	18	-3267.21	19	-3267.2	0.21994	0.21102	3.58834	0.007324	1	0.9318
OG0003947	0.06525	18	-3361.49	19	-3361.05	0.0681	0.04536	4.12229	0.868842	1	0.351276
OG0003883	0.11572	18	-3000.47	19	-3000.46	0.1154	0.12042	4.66865	0.0067	1	0.934763
OG0003893	0.01936	18	-2797.54	19	-2796.48	0.02078	0.0001	4.53974	2.11341	1	0.146014
OG0003955	0.03052	18	-3090.29	19	-3089.98	0.02907	0.04762	6.20604	0.629168	1	0.427661
OG0003965	0.06402	18	-3596.05	19	-3595.94	0.0652	0.0519	2.73696	0.207502	1	0.648732
OG0003876	0.11872	18	-3827.81	19	-3827.54	0.11678	0.18376	2.81906	0.54238	1	0.461448
OG0004005	0.02016	18	-3319.96	19	-3315.72	0.01556	0.05851	5.22651	8.47635	1	0.00359793
OG0003860	0.10358	18	-4530.4	19	-4530.24	0.10572	0.08449	5.8843	0.33343	1	0.563646
OG0003948	0.0759	18	-3703.41	19	-3703.13	0.07765	0.05206	3.22628	0.541514	1	0.461806
OG0003985	0.0965	18	-3400.44	19	-3400	0.09299	0.13543	4.14875	0.888232	1	0.345957
OG0003945	0.03435	18	-4809.9	19	-4809.47	0.03532	0.02025	3.57072	0.86265	1	0.352998
OG0003887	0.05783	18	-3286.6	19	-3286.44	0.05918	0.04402	3.78692	0.306514	1	0.579827
OG0003915	0.07258	18	-3830.13	19	-3829.45	0.07524	0.03818	4.15289	1.35971	1	0.243588
OG0003970	0.18147	18	-5714.59	19	-5714.4	0.17931	0.23936	3.37279	0.384022	1	0.535459
OG0003912	0.18647	18	-6786.69	19	-6785.85	0.19272	0.13053	4.40613	1.67695	1	0.19533
OG0003900	0.13553	18	-6399.02	19	-6398.6	0.13889	0.10292	3.57707	0.85427	1	0.355347
OG0003971	0.22778	18	-6136.04	19	-6132.79	0.24171	0.11409	3.7953	6.49731	1	0.0108038
OG0003921	0.20277	18	-7172.24	19	-7168.16	0.18877	0.38094	4.19152	8.15561	1	0.00429281
OG0003897	0.19218	18	-5582.93	19	-5581.67	0.19796	0.10604	4.33732	2.53116	1	0.111618
OG0003983	0.05953	18	-3719.49	19	-3719.44	0.06012	0.0489	6.89087	0.10522	1	0.745653
OG0003857	0.09831	18	-5000.47	19	-4997.72	0.09113	0.2042	3.57022	5.50157	1	0.0189994
OG0003855	0.2443	18	-4772.29	19	-4770.8	0.24842	0.05015	3.81954	2.99303	1	0.0836238
OG0004012	0.07991	18	-5120.34	19	-5120.26	0.07894	0.09284	5.25953	0.15732	1	0.691636
OG0003951	0.07003	18	-4953.37	19	-4952.7	0.06705	0.10626	2.78591	1.32828	1	0.249111
OG0003964	0.25885	18	-5416	19	-5414.74	0.2688	0.15517	2.86881	2.53607	1	0.111272
OG0004015	0.24632	18	-4678.4	19	-4676.74	0.26014	0.14171	4.91326	3.30865	1	0.0689162
OG0004004	0.15355	18	-3453.01	19	-3452.13	0.16023	0.08775	5.16095	1.77026	1	0.18335
OG0003867	0.05618	18	-4980.98	19	-4980.67	0.05795	0.03612	3.36514	0.618636	1	0.431555
OG0003936	0.18115	18	-8292.57	19	-8289.53	0.17172	0.30646	3.81844	6.07792	1	0.0136882
OG0003891	0.09792	18	-5977.79	19	-5972.68	0.1054	0.02604	4.36631	10.231	1	0.00138102
OG0003969	0.13357	18	-6280.75	19	-6280.23	0.13612	0.09105	5.26873	1.03281	1	0.309499
OG0003868	0.13812	18	-4903.71	19	-4901.11	0.12774	0.25132	3.45203	5.2132	1	0.022416
OG0003984	0.07851	18	-4346.35	19	-4345.89	0.08081	0.04599	4.93086	0.910542	1	0.339971
OG0003882	0.17996	18	-6729.35	19	-6726.67	0.16993	0.31391	3.91886	5.35323	1	0.0206839
OG0003879	0.1076	18	-7434.9	19	-7434.68	0.10598	0.12899	4.32803	0.441576	1	0.506363
OG0003988	0.01876	18	-3620.52	19	-3619.92	0.02002	0.00744	3.7154	1.18999	1	0.275331
OG0003998	0.08454	18	-5470.65	19	-5470.65	0.08468	0.08291	4.70947	0.001896	1	0.965269
OG0003863	0.02169	18	-4228.92	19	-4228.78	0.02233	0.0142	5.96291	0.28547	1	0.593138
OG0003856	0.10798	18	-7769.83	19	-7765.51	0.10194	0.22645	3.75128	8.6483	1	0.00327366
OG0003942	0.22698	18	-5834.27	19	-5832.52	0.23813	0.1294	3.05711	3.5033	1	0.0612467
OG0003866	0.0289	18	-3209.1	19	-3208.12	0.03111	0.0001	2.4306	1.95786	1	0.161742
OG0003963	0.02128	18	-3768.97	19	-3768.13	0.02273	0.0001	3.2224	1.66834	1	0.196481
OG0004002	0.03823	18	-7054.9	19	-7054.65	0.0373	0.05018	3.23947	0.495994	1	0.481266
OG0004007	0.04503	18	-3899	19	-3898.07	0.04737	0.01895	5.5908	1.87475	1	0.170933
OG0003923	0.09517	18	-6591.68	19	-6591.62	0.09438	0.10746	2.52914	0.133512	1	0.714818
OG0003981	0.03679	18	-4929.76	19	-4929.25	0.03864	0.01523	4.53528	1.01624	1	0.313412
OG0004001	0.11749	18	-5755.32	19	-5752.65	0.11125	0.27109	2.90508	5.32318	1	0.0210436
OG0003884	0.02318	18	-6374.17	19	-6373.5	0.02432	0.01267	6.81956	1.33156	1	0.248529
OG0003979	0.10451	18	-5904.32	19	-5903.79	0.10724	0.07196	4.63375	1.07296	1	0.300278
OG0004013	0.10665	18	-6604.52	19	-6603.24	0.10397	0.1948	4.39165	2.56123	1	0.109514
OG0003914	0.06738	18	-7138.84	19	-7138.39	0.0687	0.04588	2.80507	0.905702	1	0.341257
OG0004053	0.32038	18	-3788.76	19	-3787.82	0.3033	0.45614	3.89943	1.88294	1	0.17
OG0004031	1.11184	18	-2539.59	19	-2371.61	0.06623	0.06107	5.47586	335.96	1	0
OG0004022	0.09625	18	-2001.17	19	-2000.58	0.0896	0.14692	5.17827	1.18362	1	0.27662
OG0003878	0.15434	18	-8004.47	19	-8004.11	0.15651	0.1196	4.02748	0.70232	1	0.402005
OG0004051	0.06568	18	-2821.46	19	-2821.46	0.0659	0.06388	5.46383	0.003382	1	0.953625
OG0004095	0.15001	18	-1370.79	19	-1370.54	0.14556	0.22037	2.53962	0.4907	1	0.483615
OG0004026	0.02765	18	-1232.08	19	-1231.15	0.03055	0.0001	6.80458	1.85454	1	0.173257
OG0003966	0.3852	18	-10926.8	19	-10923.1	0.36565	0.63848	4.64837	7.47057	1	0.00627158
OG0004052	0.0297	18	-3541.28	19	-3541.23	0.03019	0.02367	4.8371	0.10928	1	0.740965
OG0004086	0.04699	18	-1321.43	19	-1321.28	0.0451	0.07367	2.24272	0.307592	1	0.579162
OG0004039	0.02603	18	-4451.16	19	-4450.86	0.02483	0.03977	5.86402	0.610964	1	0.434425
OG0004089	0.58915	18	-1631.14	19	-1630.42	0.54934	1.19034	3.25062	1.44244	1	0.229746
OG0004042	0.0818	18	-3069.13	19	-3069.1	0.0826	0.07424	3.39355	0.067296	1	0.795315
OG0003910	0.17241	18	-7820.2	19	-7820.15	0.17362	0.15772	4.15657	0.10006	1	0.751758
OG0004066	0.03667	18	-2160.69	19	-2159.53	0.03894	0.0001	1.43052	2.32491	1	0.127318
OG0004047	0.10398	18	-5105.07	19	-5104.4	0.10696	0.0611	3.95968	1.33272	1	0.248322
OG0004034	0.02757	18	-2752.75	19	-2752.47	0.02625	0.0498	2.74173	0.549968	1	0.458331
OG0003962	0.13203	18	-5822.68	19	-5818.35	0.14078	0.05001	3.58929	8.66231	1	0.0032486
OG0004019	0.14698	18	-2346.75	19	-2346.47	0.15295	0.08495	5.05219	0.55212	1	0.457453
OG0004057	0.05465	18	-2633.25	19	-2630.47	0.04827	0.16586	5.37934	5.55262	1	0.018453
OG0004092	0.30873	18	-1978.07	19	-1978.06	0.30983	0.27478	3.51904	0.018558	1	0.891641
OG0003890	0.08603	18	-7420.59	19	-7420.54	0.08667	0.07702	4.12469	0.105364	1	0.745485
OG0004115	0.01507	18	-1303.09	19	-1302.89	0.01565	0.0001	4.08513	0.394792	1	0.529791
OG0004018	0.09488	18	-3646.93	19	-3645.65	0.09163	0.25829	3.16935	2.55299	1	0.110086
OG0004048	0.00298	18	-2443.41	19	-2443.37	0.00308	0.0001	3.98079	0.064946	1	0.798843
OG0004021	0.0203	18	-2199.54	19	-2198.82	0.02228	0.0001	3.04615	1.43971	1	0.230186
OG0004101	0.07314	18	-1916.75	19	-1916.32	0.07578	0.031	3.2968	0.861818	1	0.35323
OG0004103	0.29841	18	-2975.35	19	-2975.22	0.29213	0.35498	4.01803	0.271018	1	0.60265
OG0004085	0.14824	18	-2115.64	19	-2115.29	0.15449	0.09809	4.05866	0.709148	1	0.399727
OG0004060	0.16072	18	-2116.04	19	-2114.14	0.1535	1.08875	2.85545	3.79096	1	0.05153
OG0004114	0.06556	18	-3917.23	19	-3917.05	0.06732	0.05112	6.14627	0.345836	1	0.55648
OG0004070	0.10789	18	-3255.12	19	-3255.05	0.10582	0.12516	3.01886	0.145354	1	0.703015
OG0004084	0.0267	18	-1985.81	19	-1985.61	0.02592	0.05644	2.10368	0.403792	1	0.525137
OG0003993	0.10139	18	-5811.55	19	-5810.6	0.10619	0.05817	5.90713	1.90631	1	0.167373
OG0003881	0.04583	18	-6522.58	19	-6521.83	0.04419	0.07281	4.1882	1.49717	1	0.221107
OG0004093	0.10867	18	-2501.44	19	-2501.32	0.11055	0.08535	4.31375	0.227846	1	0.633126
OG0004065	0.17921	18	-3242.06	19	-3241.52	0.18526	0.11733	5.63572	1.08635	1	0.297281
OG0004068	0.16385	18	-4106.2	19	-4105.79	0.15957	0.22323	5.01698	0.822768	1	0.364372
OG0004073	0.15031	18	-4016.81	19	-4015.88	0.15688	0.09137	4.24992	1.86745	1	0.171768
OG0004116	0.05339	18	-2318.99	19	-2316.57	0.04932	0.22679	3.50156	4.85534	1	0.0275607
OG0004111	0.10625	18	-3647.75	19	-3647.32	0.10961	0.07255	4.36521	0.857412	1	0.354464
OG0004033	0.05333	18	-2693.61	19	-2693.21	0.0556	0.02934	4.42197	0.79332	1	0.373098
OG0004112	0.27129	18	-3390.16	19	-3390.09	0.27377	0.22583	3.12321	0.129602	1	0.718845
OG0004100	0.11207	18	-3607.31	19	-3604.84	0.10477	0.26454	3.48504	4.93528	1	0.0263138
OG0004097	0.52884	18	-2492.83	19	-2492.48	0.50916	0.75853	3.72561	0.70661	1	0.400572
OG0004113	0.04639	18	-2144.45	19	-2141.47	0.04152	0.2816	4.96537	5.95991	1	0.0146348
OG0004067	0.03078	18	-4178.9	19	-4178.88	0.03107	0.02601	4.26893	0.05511	1	0.814399
OG0004074	0.17758	18	-6139.86	19	-6139.8	0.17616	0.19378	3.89506	0.120162	1	0.728859
OG0003864	0.03512	18	-7162.23	19	-7158.77	0.03806	0.0001	2.59916	6.90717	1	0.00858508
OG0004017	0.20875	18	-6843.61	19	-6843.46	0.21118	0.18033	4.53657	0.300134	1	0.583798
OG0004055	0.0368	18	-4713.54	19	-4713.3	0.03809	0.02325	7.09526	0.475538	1	0.49045
OG0004083	0.43904	18	-6482.75	19	-6482.74	0.43954	0.43119	3.33489	0.003662	1	0.951746
OG0004082	0.04581	18	-4716.74	19	-4711.15	0.03992	0.14164	2.41853	11.1651	1	0.000833496
OG0004059	0.0835	18	-4698.7	19	-4698.61	0.08451	0.0721	3.8109	0.169272	1	0.68076
OG0004077	0.10669	18	-3322.42	19	-3322.36	0.10532	0.12548	4.14787	0.130516	1	0.717898
OG0004120	0.04139	18	-2077.4	19	-2077.03	0.03898	0.06684	4.03436	0.738412	1	0.39017
OG0004117	0.09896	18	-4877.3	19	-4876.53	0.10264	0.06136	3.03815	1.53287	1	0.215682
OG0004125	0.03372	18	-2380.61	19	-2379.08	0.03654	0.0001	7.76976	3.05355	1	0.0805609
OG0004161	0.12975	18	-2709.63	19	-2709.56	0.13148	0.11138	4.08399	0.138714	1	0.709563
OG0004096	0.05097	18	-4880.22	19	-4880.13	0.05028	0.06111	3.32428	0.182116	1	0.669561
OG0004032	0.08298	18	-6246.62	19	-6246.54	0.08378	0.07083	3.59593	0.179698	1	0.671633
OG0004159	0.10642	18	-3877.38	19	-3876.35	0.10214	0.18041	3.7365	2.07157	1	0.150067
OG0004094	0.18481	18	-4902.32	19	-4900.41	0.19301	0.08008	3.53709	3.82792	1	0.0504053
OG0004106	0.0466	18	-5239.47	19	-5239.08	0.04742	0.02078	2.73243	0.783806	1	0.37598
OG0004076	0.15906	18	-5805.77	19	-5802.37	0.14908	0.32625	2.76327	6.79253	1	0.00915401
OG0004204	0.36601	18	-1511.09	19	-1511.09	0.36353	0.38323	4.98364	0.01142	1	0.914897
OG0004177	0.45133	18	-2349.86	19	-2349.85	0.45347	0.41335	2.72352	0.0235	1	0.878164
OG0004201	0.11485	18	-1486.65	19	-1486.58	0.11286	0.14624	3.70682	0.122776	1	0.726043
OG0004027	0.024	18	-4293.14	19	-4292.74	0.02318	0.05047	2.74598	0.812372	1	0.36742
OG0004132	0.05243	18	-2545.49	19	-2542.68	0.05591	0.0001	3.73954	5.61043	1	0.0178539
OG0004183	0.12836	18	-1575.02	19	-1575.02	0.12765	0.14163	2.94262	0.013366	1	0.907961
OG0004206	0.2601	18	-2592.43	19	-2592.43	0.26051	0.25591	4.24454	0.001796	1	0.966196
OG0004203	0.41865	18	-2014.76	19	-2014.43	0.42627	0.19451	2.5903	0.660228	1	0.416479
OG0004150	0.11576	18	-2944.79	19	-2944.79	0.116	0.11146	2.75988	0.005426	1	0.94128
OG0004151	0.14586	18	-2633.98	19	-2633.58	0.14209	0.23011	3.83396	0.806144	1	0.369263
OG0004186	0.31103	18	-1861.41	19	-1861.37	0.31515	0.26704	4.67072	0.074966	1	0.784239
OG0004058	0.10195	18	-6957.85	19	-6957.57	0.1032	0.07057	5.52598	0.566376	1	0.451703
OG0004123	0.01663	18	-4885.96	19	-4884.63	0.01483	0.03478	4.36999	2.65715	1	0.103085
OG0004063	0.12641	18	-5653.44	19	-5646.94	0.11334	0.34153	3.47147	13.0001	1	0.000311472
OG0004196	0.01932	18	-1876.39	19	-1875.74	0.02085	0.0001	8.24563	1.29441	1	0.255237
OG0004119	0.20429	18	-2482.36	19	-2477.49	0.18042	0.90556	3.02805	9.74238	1	0.00180067
OG0004069	0.07919	18	-6040.18	19	-6039.92	0.07749	0.09961	3.98521	0.518658	1	0.471415
OG0004192	0.14565	18	-2296.67	19	-2296.09	0.15074	0.07657	3.81615	1.16967	1	0.279469
OG0004171	0.12604	18	-2910.65	19	-2910.48	0.12904	0.10009	4.99829	0.33259	1	0.564138
OG0004126	0.02659	18	-3252.12	19	-3251.64	0.0275	0.01079	4.13066	0.945334	1	0.33091
OG0004056	0.06056	18	-4419.62	19	-4419.58	0.06004	0.07358	3.06949	0.090274	1	0.763829
OG0004141	0.13318	18	-3216.46	19	-3216.38	0.13481	0.11132	4.90889	0.161346	1	0.68792
OG0004172	0.04	18	-2899.95	19	-2896.45	0.04377	0.0001	5.77095	6.99675	1	0.00816577
OG0004040	0.04808	18	-5743.96	19	-5743.95	0.04826	0.04459	4.03071	0.020238	1	0.886874
OG0004165	0.05977	18	-6062.35	19	-6062.34	0.05957	0.06262	3.48319	0.01292	1	0.909502
OG0004156	0.15921	18	-6586.84	19	-6586.68	0.16106	0.13429	3.4054	0.330168	1	0.56556
OG0004122	0.1202	18	-5387.45	19	-5384.54	0.11154	0.23823	3.11459	5.8325	1	0.0157328
OG0004152	0.03086	18	-2858.56	19	-2858.54	0.03056	0.03574	4.00558	0.033764	1	0.85421
OG0004138	0.25019	18	-4592.17	19	-4591.53	0.25752	0.17685	3.06034	1.27223	1	0.259349
OG0004127	0.09993	18	-4686.8	19	-4684.84	0.10506	0.04193	3.87375	3.91917	1	0.0477386
OG0004184	0.01314	18	-2783.23	19	-2782.87	0.01227	0.03545	4.46541	0.723694	1	0.394935
OG0004129	0.09486	18	-2847.81	19	-2846.64	0.08805	0.24536	5.01219	2.34083	1	0.126022
OG0004107	0.13579	18	-8889.95	19	-8883	0.12542	0.30309	3.64233	13.897	1	0.000193109
OG0004035	0.06439	18	-7661.96	19	-7661.96	0.06447	0.063	2.30912	0.002538	1	0.959821
OG0004164	0.03303	18	-6769.07	19	-6766.8	0.03448	0.0001	2.83869	4.5417	1	0.0330788
OG0004191	0.0267	18	-3048.28	19	-3047.13	0.02397	0.06508	4.9233	2.29484	1	0.129805
OG0004162	0.13043	18	-5608.2	19	-5606.93	0.13494	0.07411	3.30834	2.5365	1	0.111241
OG0004155	0.10001	18	-6122.97	19	-6122.94	0.09919	0.11068	4.16697	0.074474	1	0.784931
OG0004135	0.13142	18	-3578.72	19	-3573.22	0.11705	0.4178	3.43723	10.9965	1	0.000912829
OG0004205	0.127	18	-2755.17	19	-2754.82	0.12312	0.18157	5.97733	0.696704	1	0.403893
OG0004154	0.02667	18	-2769.73	19	-2768.98	0.02788	0.0001	2.56109	1.50346	1	0.220139
OG0004136	0.03548	18	-4349.33	19	-4349.25	0.03602	0.02663	1.95871	0.15282	1	0.695855
OG0004176	0.12037	18	-3934.93	19	-3934.86	0.12177	0.10276	5.14571	0.151758	1	0.696861
OG0004178	0.01538	18	-2723.5	19	-2722.62	0.01704	0.0001	6.27994	1.76016	1	0.184604
OG0004071	0.06896	18	-7190.69	19	-7190.41	0.06791	0.09637	2.68797	0.572302	1	0.449346
OG0004145	0.20536	18	-5606.64	19	-5601.51	0.18982	0.44615	2.28026	10.2654	1	0.00135551
OG0004175	0.1639	18	-5042.88	19	-5041.73	0.15735	0.25331	2.66917	2.29072	1	0.13015
OG0004118	0.01874	18	-3364.78	19	-3364.78	0.01893	0.01667	6.07458	0.014306	1	0.904794
OG0004149	0.0342	18	-3326.32	19	-3326.14	0.03498	0.02258	3.08651	0.359462	1	0.548805
OG0004142	0.03614	18	-3610.76	19	-3610.76	0.03606	0.03711	1.89669	0.001792	1	0.966234
OG0004182	0.36899	18	-6759.69	19	-6759.69	0.36941	0.36393	2.78495	0.002624	1	0.959146
OG0004211	0.03817	18	-3301.01	19	-3299.84	0.04015	0.0001	3.39382	2.34385	1	0.125778
OG0004020	0.05538	18	-6083.28	19	-6081.84	0.05774	0.01414	2.95695	2.87354	1	0.0900464
OG0004188	0.03935	18	-3744.65	19	-3744.42	0.04067	0.02714	5.37113	0.451824	1	0.50147
OG0004045	0.05728	18	-7278.76	19	-7278.23	0.05891	0.03162	3.37098	1.06721	1	0.301577
OG0004105	0.12606	18	-6178.03	19	-6177.2	0.13041	0.07649	3.1993	1.6572	1	0.197982
OG0004157	0.18334	18	-6084.28	19	-6084.04	0.18074	0.24209	4.1334	0.483278	1	0.486941
OG0004208	0.13985	18	-4746.74	19	-4743.18	0.14895	0.03108	2.64215	7.12149	1	0.00761655
OG0004207	0.03068	18	-5318.89	19	-5318.34	0.03191	0.01573	4.3625	1.09208	1	0.29601
OG0004245	0.10439	18	-722.659	19	-721.487	0.11323	0.0001	4.01814	2.34483	1	0.1257
OG0004121	0.2625	18	-5650.25	19	-5649.02	0.25237	0.39709	4.03419	2.46089	1	0.116712
OG0004226	0.08645	18	-1290.99	19	-1290.69	0.0928	0.04934	4.4398	0.614336	1	0.43316
OG0004133	0.21246	18	-7677.16	19	-7674.94	0.20308	0.33549	3.66165	4.43637	1	0.035181
OG0004235	0.12334	18	-2478.32	19	-2477.89	0.12834	0.07735	6.25538	0.863074	1	0.35288
OG0004189	0.01857	18	-5467.55	19	-5464.8	0.01603	0.0581	3.60276	5.5133	1	0.0188724
OG0004202	0.01537	18	-5837.91	19	-5836.76	0.01612	0.0001	3.43321	2.29946	1	0.129419
OG0004144	0.0881	18	-6649.8	19	-6649.6	0.08657	0.10555	5.28436	0.403286	1	0.525397
OG0004251	0.18357	18	-2263.91	19	-2263.87	0.18559	0.15911	4.03914	0.094768	1	0.758201
OG0004243	0.06857	18	-1653.93	19	-1653.92	0.07079	0.04102	2.78818	0.000926	1	0.975724
OG0004180	0.38537	18	-7714.83	19	-7714.14	0.37394	0.50517	4.9281	1.39284	1	0.237925
OG0004214	0.07371	18	-1531.35	19	-1527.44	0.06177	0.40153	2.68026	7.82526	1	0.00515211
OG0004233	0.11849	18	-3475.35	19	-3473.46	0.12617	0.04751	3.80362	3.79095	1	0.0515303
OG0004195	0.24977	18	-9897.7	19	-9893.44	0.23588	0.43431	3.42295	8.51816	1	0.0035162
OG0004229	0.0763	18	-2806.96	19	-2806.86	0.07749	0.05586	3.53297	0.189646	1	0.663211
OG0004231	0.05234	18	-3167.89	19	-3146.63	0.02759	0.26314	4.26398	42.5232	1	0
OG0004248	0.17939	18	-1471.54	19	-1470.17	0.16365	0.37957	3.17747	2.74273	1	0.0976979
OG0004238	0.07149	18	-2676.24	19	-2675.31	0.07428	0.02141	3.97492	1.87751	1	0.170617
OG0004260	0.01709	18	-2833.41	19	-2832.02	0.01856	0.0001	3.88609	2.79416	1	0.0946086
OG0004239	0.01573	18	-4973.68	19	-4973.14	0.01645	0.00644	6.42683	1.08923	1	0.296642
OG0004264	0.10573	18	-2057.22	19	-2055.61	0.11812	0.02377	6.5848	3.2145	1	0.0729883
OG0004167	0.06274	18	-6790.43	19	-6788.2	0.05955	0.12851	1.82698	4.46196	1	0.0346576
OG0004241	0.01357	18	-2210.25	19	-2210.06	0.01285	0.02706	3.058	0.386934	1	0.533915
OG0004200	0.02704	18	-4469.19	19	-4469.12	0.02667	0.03612	2.62357	0.13471	1	0.713598
OG0004244	0.01814	18	-1695.65	19	-1694.95	0.01933	0.0001	5.22875	1.39377	1	0.23777
OG0004153	0.05137	18	-7000.99	19	-6999.58	0.04856	0.08393	5.20798	2.83229	1	0.0923864
OG0004254	0.11727	18	-2144.48	19	-2143.84	0.12287	0.06002	3.21947	1.27563	1	0.258712
OG0004221	0.10128	18	-2888.99	19	-2888.99	0.10123	0.1017	5.23822	0.00014	1	0.99056
OG0004242	0.04694	18	-4149.91	19	-4149.63	0.04826	0.03082	2.55668	0.57497	1	0.448291
OG0004240	0.03686	18	-4471.95	19	-4470.85	0.03467	0.07543	8.27707	2.18767	1	0.13912
OG0004266	0.06333	18	-3462.39	19	-3460.72	0.05817	0.13258	5.07085	3.34796	1	0.0672884
OG0004225	0.39946	18	-6185.27	19	-6185.03	0.39308	0.47453	2.56608	0.491926	1	0.483069
OG0004209	0.0539	18	-6522.76	19	-6522.05	0.05192	0.08789	4.63526	1.41139	1	0.234825
OG0004212	0.13601	18	-4666.39	19	-4666.38	0.13531	0.14293	4.94104	0.025646	1	0.872768
OG0004222	0.36049	18	-5941.33	19	-5941.22	0.36461	0.31603	3.72678	0.222568	1	0.63709
OG0004250	0.01389	18	-3654.47	19	-3653.53	0.01473	0.0001	4.30358	1.89044	1	0.169153
OG0004267	0.19485	18	-4175.27	19	-4175.24	0.19617	0.18149	4.38807	0.050074	1	0.822935
OG0004213	0.1203	18	-5547.81	19	-5547.81	0.12013	0.12239	2.75961	0.002634	1	0.959069
OG0004215	0.06844	18	-4299.6	19	-4299.58	0.06798	0.07314	4.79649	0.033932	1	0.853852
OG0004230	0.17323	18	-6845.75	19	-6844.95	0.16687	0.22451	5.21364	1.59867	1	0.206092
OG0004261	0.03226	18	-6690.34	19	-6688.63	0.02997	0.06326	4.29256	3.4338	1	0.0638748
OG0004234	0.14521	18	-7042.14	19	-7040.25	0.15259	0.08572	4.02815	3.78632	1	0.0516732
OG0004258	0.16594	18	-4514.79	19	-4514.65	0.16373	0.20257	2.60702	0.285882	1	0.592872
OG0004249	0.06108	18	-5513.55	19	-5513.55	0.06108	0.06117	3.17645	8e-06	1	0.997743
OG0004246	0.03109	18	-2966.03	19	-2964.85	0.0271	0.07644	3.08163	2.3605	1	0.124443
OG0004227	0.03151	18	-5999.38	19	-5998.35	0.03315	0.0001	2.76471	2.06979	1	0.150242
OG0004257	0.04316	18	-4876.54	19	-4876.52	0.04348	0.03742	3.23883	0.039686	1	0.842096
OG0004337	0.19863	18	-1543.57	19	-1543.5	0.19498	0.23752	4.42163	0.126234	1	0.722369
OG0004217	0.0396	18	-7012.87	19	-7012.26	0.04095	0.02637	3.5421	1.2189	1	0.269577
OG0004328	0.17035	18	-1597.62	19	-1597.36	0.17674	0.11281	3.7272	0.52014	1	0.470782
OG0004271	0.10273	18	-2195.15	19	-2194.97	0.10073	0.15047	5.30093	0.350392	1	0.553891
OG0004295	0.18025	18	-1391.7	19	-1390.75	0.16932	0.4335	5.06874	1.90611	1	0.167396
OG0004223	0.05727	18	-6323.38	19	-6323.07	0.0556	0.07897	4.86279	0.623104	1	0.429896
OG0004358	0.03479	18	-1249.22	19	-1249.09	0.03373	0.06236	5.31956	0.25179	1	0.615817
OG0004300	0.22284	18	-1412.21	19	-1411.59	0.20949	0.41429	4.06762	1.24585	1	0.264347
OG0004306	0.03443	18	-1579.87	19	-1579.43	0.03183	0.15559	5.71214	0.865254	1	0.352273
OG0004263	0.05667	18	-5562.42	19	-5562.02	0.0581	0.0326	6.25485	0.814512	1	0.36679
OG0004320	0.01317	18	-2186.45	19	-2185.69	0.01153	0.03607	7.98142	1.50839	1	0.219384
OG0004368	0.08676	18	-2326.29	19	-2325.78	0.09133	0.0516	3.72946	1.02069	1	0.312356
OG0004331	0.21864	18	-1859.24	19	-1858.77	0.20937	0.54614	3.94377	0.93149	1	0.334476
OG0004341	0.23341	18	-2257.33	19	-2255.79	0.24393	0.04759	2.41502	3.08496	1	0.0790193
OG0004334	0.03357	18	-3244.32	19	-3243.84	0.03528	0.01431	6.45302	0.946442	1	0.330627
OG0004310	0.15174	18	-2914.67	19	-2914.5	0.15491	0.12002	4.68727	0.329042	1	0.566224
OG0004351	0.18435	18	-2895.47	19	-2895.44	0.18548	0.15875	2.60215	0.062352	1	0.802816
OG0004318	0.00665	18	-2424.35	19	-2424.05	0.00738	0.0001	5.21728	0.600602	1	0.438348
OG0004335	0.06241	18	-3628.11	19	-3627.1	0.05926	0.10716	3.51573	2.02288	1	0.154945
OG0004354	0.09461	18	-2798.82	19	-2798.67	0.09646	0.07325	4.2238	0.29836	1	0.584912
OG0004380	0.11796	18	-2563.02	19	-2562.8	0.12078	0.07756	2.53573	0.432932	1	0.510554
OG0004270	0.04831	18	-4002.65	19	-4000.88	0.04408	0.10044	5.74223	3.53938	1	0.0599279
OG0004322	0.06524	18	-1865.69	19	-1865.39	0.06252	0.10511	3.64186	0.59099	1	0.442037
OG0004284	0.12904	18	-3039.42	19	-3037.43	0.13825	0.03802	5.27585	3.99738	1	0.0455711
OG0004308	0.0204	18	-1792.31	19	-1792.12	0.01956	0.04137	3.68472	0.38338	1	0.5358
OG0004366	0.03046	18	-4312.13	19	-4311.49	0.02862	0.05824	5.56037	1.28101	1	0.257711
OG0004379	0.01641	18	-5826.06	19	-5825.59	0.01561	0.02782	6.91057	0.93233	1	0.334258
OG0004298	0.25371	18	-4436.88	19	-4434.73	0.23996	0.473	3.45656	4.30499	1	0.0380006
OG0004315	0.11487	18	-2554.99	19	-2552.51	0.12894	0.0434	3.04381	4.96287	1	0.0258973
OG0004330	0.01332	18	-4854.67	19	-4854.53	0.01363	0.00822	5.52955	0.275058	1	0.599959
OG0004359	0.00869	18	-3922.51	19	-3921.96	0.00904	0.0001	3.24526	1.11139	1	0.291781
OG0004278	0.29006	18	-5139.22	19	-5138.9	0.29617	0.22625	4.92634	0.637126	1	0.424753
OG0004274	0.0898	18	-5313.55	19	-5313.09	0.09185	0.05509	2.43463	0.913038	1	0.33931
OG0004348	0.13147	18	-4656.77	19	-4656.33	0.13441	0.09011	4.11128	0.873196	1	0.350072
OG0004312	0.10945	18	-3942.18	19	-3942.11	0.11027	0.08667	3.82794	0.130658	1	0.717751
OG0004325	0.24445	18	-5709.84	19	-5703	0.26629	0.07504	3.91152	13.687	1	0.000215946
OG0004375	0.09661	18	-4342.73	19	-4341.48	0.09221	0.17322	4.32395	2.5019	1	0.113709
OG0004303	0.07581	18	-4636.14	19	-4635.65	0.07792	0.05034	5.0957	0.984994	1	0.320969
OG0004269	0.07059	18	-6397.28	19	-6396.14	0.06791	0.12259	4.13587	2.28452	1	0.130671
OG0004321	0.12803	18	-2609.15	19	-2609.15	0.12753	0.13646	3.23466	0.00838	1	0.927062
OG0004340	0.13764	18	-5555.93	19	-5555.79	0.13948	0.11687	4.53352	0.278368	1	0.597773
OG0004338	0.12685	18	-5192.92	19	-5191.89	0.12036	0.18145	5.77891	2.05197	1	0.15201
OG0004371	0.07667	18	-6358.24	19	-6358.19	0.07744	0.06765	5.99476	0.10881	1	0.741503
OG0004369	0.3187	18	-7915.21	19	-7914.34	0.30964	0.42563	2.96504	1.73131	1	0.188243
OG0004360	0.15283	18	-6994.26	19	-6993.73	0.15588	0.11435	3.75411	1.04217	1	0.307317
OG0004296	0.17216	18	-4899.9	19	-4899.56	0.17531	0.12556	4.14062	0.68067	1	0.409356
OG0004355	0.13065	18	-6053.21	19	-6053.09	0.12883	0.152	4.24779	0.24621	1	0.619756
OG0004288	0.01586	18	-4535.48	19	-4535.01	0.01513	0.02695	3.52329	0.92751	1	0.335511
OG0004314	0.19486	18	-5373.05	19	-5360.02	0.16544	0.61108	4.36097	26.0641	1	3.3e-07
OG0004305	0.10524	18	-4591.83	19	-4590.07	0.09906	0.18519	4.82851	3.52574	1	0.060423
OG0004275	0.07176	18	-6032.18	19	-6031.2	0.0683	0.11479	6.15128	1.96264	1	0.161231
OG0004339	0.10178	18	-5110.28	19	-5109.97	0.10432	0.06566	4.80884	0.604828	1	0.436742
OG0004279	0.08814	18	-5162.34	19	-5159.76	0.08036	0.1578	3.43229	5.16358	1	0.0230653
OG0004220	0.1885	18	-7333.09	19	-7332.96	0.19009	0.15383	3.71026	0.277886	1	0.59809
OG0004294	0.07532	18	-4703.86	19	-4703.76	0.0737	0.09206	3.69643	0.218104	1	0.640488
OG0004370	0.0296	18	-3998.73	19	-3997.63	0.03102	0.0001	2.80741	2.20048	1	0.137967
OG0004317	0.03005	18	-3632.15	19	-3631.77	0.02868	0.05309	5.45012	0.74998	1	0.386483
OG0004346	0.12373	18	-6950.04	19	-6948.03	0.11817	0.21659	3.52037	4.01897	1	0.0449912
OG0004353	0.12444	18	-5044.51	19	-5044.2	0.12751	0.09643	4.54908	0.624078	1	0.429536
OG0004347	0.19736	18	-5520.04	19	-5519.02	0.18495	0.39306	4.68085	2.05228	1	0.151979
OG0004282	0.07388	18	-6358.99	19	-6358.33	0.07611	0.04855	6.05889	1.31361	1	0.251742
OG0004307	0.05114	18	-6882.04	19	-6881.27	0.04948	0.07426	4.92654	1.53968	1	0.214665
OG0004350	0.08827	18	-7947.31	19	-7946.5	0.08576	0.11805	2.68858	1.60993	1	0.204502
OG0004352	0.1283	18	-6671.12	19	-6670.89	0.1261	0.1534	3.44563	0.464702	1	0.495435
OG0004286	0.05792	18	-5815.68	19	-5815.64	0.05737	0.06391	3.8594	0.079426	1	0.778077
OG0004291	0.01404	18	-3402.01	19	-3401.7	0.01479	0.0001	4.33297	0.610828	1	0.434476
OG0004356	0.16889	18	-7123.57	19	-7123.2	0.17168	0.12674	4.89193	0.752198	1	0.385781
OG0004304	0.09435	18	-5282.35	19	-5279.35	0.09961	0.02256	3.34282	6.00388	1	0.0142745
OG0004367	0.09348	18	-4412.35	19	-4411.42	0.09668	0.0384	4.20082	1.86262	1	0.172323
OG0004285	0.12551	18	-6297.23	19	-6293.67	0.13285	0.05568	3.80424	7.1348	1	0.00756021
OG0004327	0.16062	18	-7023.96	19	-7023.82	0.15869	0.1839	5.43426	0.276842	1	0.598779
OG0004382	0.07594	18	-1492.96	19	-1491.58	0.0805	0.0001	4.2757	2.76542	1	0.0963213
OG0004302	0.09788	18	-7503.27	19	-7503.26	0.09827	0.09307	3.98173	0.031362	1	0.859435
OG0004324	0.17779	18	-8869.78	19	-8869.65	0.17947	0.15787	3.41614	0.262476	1	0.608424
OG0004392	0.12085	18	-2464.91	19	-2461.84	0.11138	0.42881	2.88389	6.13113	1	0.0132822
OG0004383	0.14722	18	-2216.6	19	-2216.15	0.14019	0.22681	3.70729	0.915898	1	0.338554
OG0004421	0.16053	18	-1475.8	19	-1475.12	0.15006	0.31531	3.19979	1.3632	1	0.242984
OG0004468	0.12459	18	-992.875	19	-992.875	0.1246	0.12452	3.71669	0	1	1
OG0004443	0.02629	18	-1313.07	19	-1311.71	0.02887	0.0001	2.49707	2.72203	1	0.0989722
OG0004363	0.17913	18	-6564.61	19	-6563	0.17521	0.52007	5.40413	3.22832	1	0.0723749
OG0004451	0.04138	18	-1803.57	19	-1803.51	0.0401	0.05515	4.74533	0.138482	1	0.709795
OG0004388	0.03461	18	-3145.5	19	-3145.4	0.03522	0.02519	4.15607	0.199906	1	0.654797
OG0004384	0.11648	18	-4711.08	19	-4704.8	0.10816	0.43342	2.65601	12.5679	1	0.000392423
OG0004494	0.14738	18	-1783.93	19	-1783.88	0.14562	0.18519	1.93195	0.095978	1	0.756711
OG0004420	0.08061	18	-3660.83	19	-3651.82	0.06656	0.30559	8.52611	18.0287	1	2.176e-05
OG0004427	0.05791	18	-3641.02	19	-3637.5	0.06469	0.01294	5.03235	7.041	1	0.00796647
OG0004433	0.0086	18	-2592.43	19	-2591.91	0.0093	0.0001	7.30144	1.04596	1	0.30644
OG0004411	0.14788	18	-5066.49	19	-5061.88	0.13601	0.35976	4.45461	9.22327	1	0.00238958
OG0004489	0.02613	18	-963.859	19	-963.621	0.02727	0.0001	4.08218	0.476802	1	0.489874
OG0004568	0.15434	18	-1555.28	19	-1554.29	0.16131	0.04095	2.38382	1.97977	1	0.159415
OG0004492	0.03107	18	-2072.6	19	-2072.59	0.03124	0.02741	3.18082	0.015358	1	0.901373
OG0004404	0.05053	18	-3374.08	19	-3374.08	0.05024	0.05257	5.42606	0.004518	1	0.94641
OG0004524	0.0058	18	-1465.59	19	-1465.56	0.00589	0.0001	2.49814	0.062834	1	0.802071
OG0004556	0.00276	18	-1048.05	19	-1047.98	0.00298	0.0001	5.9841	0.142628	1	0.705682
OG0004515	0.08924	18	-1891.94	19	-1891.61	0.08628	0.14795	5.10548	0.649422	1	0.420319
OG0004470	0.30107	18	-3251.11	19	-3250.51	0.292	0.49593	3.37884	1.19116	1	0.275097
OG0004459	0.08948	18	-3053.18	19	-3053.06	0.08795	0.11133	3.17689	0.255478	1	0.613244
OG0004543	0.27052	18	-1691.81	19	-1691.76	0.27402	0.21849	3.81214	0.090502	1	0.76354
OG0004490	0.04738	18	-1619.69	19	-1618.85	0.04248	0.1258	1.75637	1.66434	1	0.197018
OG0004428	0.18757	18	-2802.12	19	-2801.31	0.19322	0.07479	1.87407	1.63953	1	0.20039
OG0004281	0.06242	18	-6295.82	19	-6295.48	0.06378	0.04577	4.35796	0.688754	1	0.406589
OG0004550	0.04261	18	-1779.89	19	-1779.25	0.04004	0.07957	2.74736	1.28302	1	0.257338
OG0004570	0.03065	18	-1118.37	19	-1117.88	0.03249	0.0001	6.23552	0.965134	1	0.325897
OG0004501	0.03673	18	-1832.69	19	-1831.79	0.03372	0.08244	1.76186	1.79866	1	0.179874
OG0004409	0.11584	18	-3898.18	19	-3897.27	0.11003	0.17574	4.33276	1.82844	1	0.176312
OG0004483	0.02534	18	-2158.37	19	-2157.37	0.02668	0.0001	2.1764	2.0076	1	0.156513
OG0004438	0.04105	18	-2068.3	19	-2068.29	0.04149	0.03802	6.412	0.011724	1	0.913776
OG0004488	0.03469	18	-1679.29	19	-1678.6	0.03217	0.07753	3.02822	1.37895	1	0.24028
OG0004390	0.07763	18	-2510.06	19	-2509.62	0.0822	0.04128	6.08334	0.876642	1	0.349123
OG0004441	0.02143	18	-3093.02	19	-3092.05	0.02226	0.0001	6.31498	1.95752	1	0.161779
OG0004481	0.1605	18	-3780.25	19	-3780.24	0.16083	0.15295	2.42854	0.009904	1	0.920726
OG0004456	0.07693	18	-4204.81	19	-4204.59	0.07515	0.09598	4.09103	0.447472	1	0.503538
OG0004551	0.20085	18	-3005.55	19	-3005.55	0.20027	0.21071	3.83024	0.01199	1	0.912807
OG0004530	0.0315	18	-1206.63	19	-1205.87	0.03346	0.0001	2.61247	1.51467	1	0.218428
OG0004385	0.10424	18	-5169.61	19	-5169.19	0.10208	0.15531	2.29055	0.852916	1	0.355729
OG0004467	0.22322	18	-3735.31	19	-3734.68	0.21791	0.38722	4.5703	1.25014	1	0.263525
OG0004545	0.10626	18	-2177.2	19	-2177.13	0.10442	0.12585	3.99866	0.156986	1	0.691947
OG0004510	0.0117	18	-1579.9	19	-1579.76	0.011	0.02065	7.09792	0.277374	1	0.598428
OG0004449	0.3101	18	-5172.49	19	-5172.33	0.30582	0.3655	3.8854	0.312536	1	0.576128
OG0004462	0.03851	18	-2198.03	19	-2197.92	0.04043	0.00964	2.04499	0.222272	1	0.637314
OG0004471	0.10511	18	-3720.99	19	-3720.21	0.10026	0.15424	4.75925	1.55059	1	0.213048
OG0004526	0.24201	18	-3001.26	19	-3001.23	0.24424	0.22043	2.74041	0.06313	1	0.801616
OG0004440	0.01673	18	-3548.23	19	-3548.02	0.01614	0.02756	5.97661	0.41459	1	0.519649
OG0004416	0.0804	18	-4426.29	19	-4425.63	0.08342	0.03746	4.06487	1.33103	1	0.248622
OG0004474	0.0215	18	-2115.73	19	-2115.07	0.01933	0.05494	3.78756	1.32532	1	0.24964
OG0004423	0.05354	18	-3434.47	19	-3434.38	0.05427	0.04121	4.50524	0.190314	1	0.662655
OG0004432	0.16851	18	-4241.34	19	-4241.34	0.16898	0.16415	4.89615	0.00724	1	0.932191
OG0004480	0.07024	18	-3504.21	19	-3502.9	0.07376	0.02543	5.30253	2.60548	1	0.106495
OG0004464	0.17649	18	-5200.22	19	-5200.1	0.17409	0.20001	5.65727	0.229552	1	0.631856
OG0004498	0.11754	18	-3820.9	19	-3820.46	0.1142	0.17283	3.0506	0.892012	1	0.344933
OG0004434	0.13884	18	-6047.16	19	-6047	0.13719	0.16718	3.4129	0.322676	1	0.570004
OG0004507	0.08158	18	-2424.53	19	-2423.82	0.08586	0.02478	4.90523	1.42036	1	0.233345
OG0004473	0.04924	18	-4670.67	19	-4668.4	0.04391	0.10485	6.72135	4.54676	1	0.0329812
OG0004491	0.03254	18	-2484.31	19	-2481.87	0.03542	0.0001	6.7225	4.88791	1	0.0270455
OG0004453	0.04632	18	-2142.92	19	-2142.81	0.04722	0.02965	4.15635	0.209216	1	0.647383
OG0004532	0.09194	18	-2870.48	19	-2870.32	0.09392	0.072	2.58251	0.316052	1	0.57399
OG0004508	0.19018	18	-4229.01	19	-4228.53	0.1851	0.26235	4.61075	0.956886	1	0.327973
OG0004429	0.04837	18	-5449.95	19	-5449.95	0.04849	0.04713	4.69896	0.003846	1	0.95055
OG0004309	0.07177	18	-5891.3	19	-5891.29	0.07147	0.07675	8.17683	0.018292	1	0.892416
OG0004435	0.06867	18	-5447.71	19	-5447.25	0.07026	0.03834	2.61175	0.911008	1	0.339847
OG0004500	0.02961	18	-5009.92	19	-5007.95	0.03119	0.0001	3.90895	3.94007	1	0.0471488
OG0004448	0.07878	18	-4790.6	19	-4790.56	0.07951	0.06879	3.43704	0.09372	1	0.7595
OG0004486	0.07891	18	-4095.92	19	-4095.68	0.0813	0.05555	5.27978	0.490992	1	0.483485
OG0004406	0.15468	18	-6807.88	19	-6807.86	0.15397	0.16259	5.34116	0.037028	1	0.847408
OG0004496	0.11265	18	-5386.58	19	-5386.38	0.11463	0.09064	7.64603	0.397664	1	0.528298
OG0004396	0.06179	18	-2179.42	19	-2176.53	0.05329	0.25296	2.56443	5.78354	1	0.0161769
OG0004475	0.07408	18	-3935.66	19	-3928.59	0.08087	0.0001	3.77439	14.1579	1	0.000168087
OG0004425	0.0345	18	-4188.46	19	-4188.33	0.03537	0.02433	2.88411	0.266086	1	0.605969
OG0004426	0.08145	18	-4276.29	19	-4276.22	0.08223	0.06724	2.95816	0.12747	1	0.72107
OG0004534	0.093	18	-2614.96	19	-2613.84	0.088	0.19134	1.92903	2.24722	1	0.133854
OG0004407	0.15895	18	-7964.79	19	-7964.02	0.16325	0.11652	6.03201	1.55181	1	0.212868
OG0004460	0.09923	18	-6001.53	19	-6001	0.09612	0.12791	3.8812	1.05132	1	0.305203
OG0004527	0.03789	18	-2514.62	19	-2513.95	0.0402	0.01028	3.58487	1.34381	1	0.246363
OG0004391	0.11717	18	-5549.74	19	-5548.63	0.11249	0.18054	6.07068	2.23258	1	0.135128
OG0004414	0.0972	18	-4886.08	19	-4886.06	0.09754	0.08586	2.26634	0.036684	1	0.84811
OG0004400	0.15662	18	-6174.46	19	-6174.45	0.1562	0.16184	4.44432	0.01263	1	0.91052
OG0004547	0.07825	18	-3419.24	19	-3416.74	0.06804	0.2674	2.53986	5.00253	1	0.0253103
OG0004439	0.16904	18	-6404.88	19	-6404.2	0.1727	0.10864	2.50256	1.35235	1	0.244868
OG0004538	0.02391	18	-3262.78	19	-3262.73	0.02344	0.02882	2.88044	0.098778	1	0.753301
OG0004560	0.0307	18	-4111.66	19	-4111.41	0.02937	0.04263	2.96621	0.484212	1	0.486521
OG0004520	0.0412	18	-4405.74	19	-4405.18	0.03929	0.0659	4.89597	1.10432	1	0.29332
OG0004493	0.29135	18	-5567.23	19	-5566.86	0.28389	0.36238	2.88808	0.74545	1	0.387921
OG0004479	0.09685	18	-4747.03	19	-4746.15	0.09419	0.17178	2.10278	1.76948	1	0.183447
OG0004553	0.03201	18	-4562.58	19	-4562.07	0.0306	0.05149	5.74236	1.0318	1	0.309737
OG0004506	0.01999	18	-3360.4	19	-3360.4	0.02	0.01979	4.00392	0.000188	1	0.98906
OG0004463	0.06441	18	-5997.33	19	-5995.44	0.06747	0.01392	4.49575	3.78929	1	0.0515816
OG0004499	0.02336	18	-3864.98	19	-3864.7	0.02426	0.01427	6.05448	0.56649	1	0.451657
OG0004504	0.01171	18	-3379.27	19	-3379.27	0.01177	0.01077	4.20393	0.007212	1	0.932322
OG0004495	0.14604	18	-6596.9	19	-6596.81	0.14463	0.16216	5.74341	0.165268	1	0.684352
OG0004528	0.1779	18	-4436.65	19	-4435.43	0.17025	0.30133	4.01821	2.43678	1	0.118519
OG0004536	0.23758	18	-4391.37	19	-4391.36	0.23869	0.22728	2.186	0.020106	1	0.887241
OG0004552	0.20121	18	-5295.13	19	-5295.11	0.20211	0.18795	3.8047	0.041448	1	0.838676
OG0004401	0.08276	18	-4322.73	19	-4322.71	0.08231	0.09128	4.69019	0.022344	1	0.881176
OG0004537	0.35858	18	-5086.39	19	-5084.46	0.38492	0.17673	1.81456	3.87086	1	0.0491314
OG0004417	0.0361	18	-7137.21	19	-7134.01	0.03331	0.09212	2.91389	6.38979	1	0.0114778
OG0004387	0.09881	18	-6573.67	19	-6565.62	0.08785	0.2489	2.87164	16.0981	1	6.0146e-05
OG0004465	0.10439	18	-6693.85	19	-6693.76	0.10306	0.11656	5.32892	0.185778	1	0.666454
OG0004503	0.01447	18	-3653.08	19	-3651.18	0.01159	0.05573	6.76963	3.80693	1	0.0510408
OG0004457	0.06452	18	-5409.49	19	-5407.71	0.06148	0.14136	1.60901	3.54991	1	0.0595485
OG0004430	0.16159	18	-9449.44	19	-9447.68	0.15685	0.26834	2.16796	3.52159	1	0.0605745
OG0004563	0.11831	18	-5202.48	19	-5202.37	0.11685	0.13638	2.96801	0.223706	1	0.636231
OG0004514	0.13852	18	-4466.33	19	-4460.5	0.12314	0.39531	2.79607	11.6643	1	0.000637122
OG0004529	0.12156	18	-3387.14	19	-3387.12	0.12046	0.13641	4.84083	0.058488	1	0.808902
OG0004566	0.05662	18	-4818.14	19	-4817.54	0.05856	0.03293	5.9313	1.20484	1	0.272357
OG0004572	0.07952	18	-4520.45	19	-4498.72	0.05078	0.47971	3.86566	43.4538	1	0
OG0004564	0.11872	18	-4414.7	19	-4413.93	0.12314	0.07508	5.47256	1.54062	1	0.214525
OG0004549	0.03523	18	-3421.31	19	-3420.03	0.03862	0.0001	7.28356	2.56534	1	0.109229
OG0004297	0.50278	18	-8807.92	19	-8807.19	0.48969	0.68002	4.3249	1.45744	1	0.227338
OG0004512	0.21956	18	-5504.42	19	-5504.05	0.21432	0.28435	3.56004	0.744748	1	0.388144
OG0004531	0.02213	18	-4572.99	19	-4574.82	0.0192	0.05048	3.32161	-3.64428	1	invalid
OG0004419	0.08742	18	-8564.57	19	-8564.57	0.0872	0.09038	4.0886	0.013128	1	0.90878
OG0004455	0.06126	18	-4849.1	19	-4847.23	0.05705	0.14047	3.9723	3.7374	1	0.0532071
OG0004487	0.0432	18	-6003.93	19	-6001.02	0.04504	0.0001	3.47389	5.8205	1	0.0158405
OG0004393	0.03739	18	-5239.24	19	-5238.93	0.03827	0.02203	4.04543	0.621758	1	0.430395
OG0004523	0.0508	18	-3980.28	19	-3979.72	0.04745	0.08762	4.85818	1.1282	1	0.288159
OG0004511	0.05215	18	-5144.02	19	-5142.87	0.04805	0.08737	5.36017	2.30472	1	0.128981
OG0004598	0.22793	18	-1782.89	19	-1780.78	0.21651	1.43704	2.77504	4.22746	1	0.039775
OG0004477	0.13645	18	-5378.73	19	-5378.53	0.13839	0.1	2.74323	0.39466	1	0.52986
OG0004472	0.08133	18	-7855.45	19	-7851.85	0.0836	0.0001	3.1184	7.19913	1	0.0072939
OG0004539	0.04848	18	-5916.13	19	-5915.75	0.05034	0.02719	2.97202	0.76523	1	0.381697
OG0004509	0.16904	18	-6731.42	19	-6731.42	0.1693	0.16661	4.88383	0.003098	1	0.955613
OG0004629	0.11608	18	-1176.27	19	-1174.7	0.13403	0.02782	3.36332	3.14471	1	0.0761736
OG0004610	0.00267	18	-1306.49	19	-1306.39	0.00274	0.0001	2.61138	0.20165	1	0.653392
OG0004601	0.16811	18	-3290.51	19	-3290.49	0.16971	0.15558	5.04649	0.055698	1	0.813429
OG0004618	0.1289	18	-2043.1	19	-2043.06	0.12721	0.14958	4.48147	0.086064	1	0.769242
OG0004617	0.16372	18	-1648.46	19	-1648.46	0.16266	0.17351	2.09812	0.014334	1	0.904701
OG0004673	0.23535	18	-1150.68	19	-1150.02	0.25127	0.0776	2.89108	1.31617	1	0.25128
OG0004684	0.1236	18	-920.252	19	-919.76	0.10592	0.24589	2.37347	0.982878	1	0.321489
OG0004565	0.07203	18	-6595.14	19	-6594.74	0.07355	0.05281	4.58	0.794688	1	0.372686
OG0004497	0.11203	18	-6017.61	19	-6016.83	0.11715	0.07367	3.73688	1.563	1	0.211226
OG0004594	0.01711	18	-3982.21	19	-3980.19	0.0147	0.04382	4.91133	4.04667	1	0.0442585
OG0004656	0.00446	18	-928.909	19	-928.559	0.00534	0.0001	2.22613	0.700816	1	0.40251
OG0004624	0.29018	18	-2253.63	19	-2252.32	0.2704	0.53026	3.90287	2.61564	1	0.105815
OG0004544	0.0858	18	-7074.18	19	-7073.32	0.08827	0.04264	2.64002	1.71719	1	0.190055
OG0004603	0.0194	18	-3915.3	19	-3915.23	0.01982	0.01362	2.88492	0.141438	1	0.706856
OG0004625	0.09508	18	-2616.08	19	-2615.67	0.09763	0.05283	3.63709	0.809976	1	0.368127
OG0004689	0.01246	18	-1985.06	19	-1984.8	0.01156	0.02133	2.97947	0.509104	1	0.475527
OG0004591	0.03147	18	-4939.15	19	-4938.76	0.03246	0.0175	6.32427	0.789214	1	0.374338
OG0004581	0.05201	18	-3651.33	19	-3650.23	0.04914	0.1153	3.08771	2.18875	1	0.139022
OG0004502	0.03651	18	-4658.94	19	-4657.14	0.03842	0.0001	3.77497	3.59655	1	0.0578997
OG0004661	0.02427	18	-2745.58	19	-2744.92	0.02242	0.04689	6.14168	1.31268	1	0.251909
OG0004586	0.31767	18	-6365.58	19	-6365.58	0.31785	0.31553	3.24245	0.000562	1	0.981087
OG0004672	0.16736	18	-2648.17	19	-2647.02	0.15429	0.2683	5.98936	2.2945	1	0.129833
OG0004595	0.09552	18	-2957.4	19	-2957.21	0.09317	0.1288	4.82856	0.386858	1	0.533956
OG0004627	0.10246	18	-2832.63	19	-2832.61	0.10311	0.09097	3.94687	0.044814	1	0.832346
OG0004599	0.07366	18	-3412.87	19	-3411.69	0.07874	0.02463	3.47029	2.35032	1	0.125257
OG0004626	0.19492	18	-2626.99	19	-2626.66	0.18936	0.31402	3.57192	0.654904	1	0.418365
OG0004584	0.03083	18	-2484.19	19	-2483.35	0.02702	0.18264	7.391	1.69836	1	0.192502
OG0004580	0.04206	18	-3471.25	19	-3471.14	0.04298	0.03113	4.32535	0.224396	1	0.635711
OG0004604	0.33376	18	-3936.11	19	-3935.69	0.3287	0.57391	3.23587	0.83587	1	0.360581
OG0004555	0.03809	18	-5354.52	19	-5354.42	0.03863	0.0247	3.52241	0.205996	1	0.649924
OG0004686	0.02827	18	-2774.95	19	-2774.63	0.02953	0.01624	3.74215	0.62708	1	0.428428
OG0004679	0.0326	18	-3383.79	19	-3383.5	0.03403	0.02156	4.09144	0.572174	1	0.449396
OG0004606	0.02236	18	-1192.58	19	-1190.68	0.01769	999	6.47265	3.80282	1	0.0511665
OG0004681	0.16389	18	-4905.14	19	-4905.06	0.16152	0.18045	4.50135	0.17359	1	0.676941
OG0004611	0.21571	18	-3546.28	19	-3543.56	0.23229	0.09061	5.94461	5.43552	1	0.0197312
OG0004669	0.01704	18	-2334.61	19	-2332.9	0.0142	0.06134	5.13206	3.41715	1	0.0645225
OG0004585	0.05212	18	-2728.37	19	-2726.41	0.05556	0.0001	2.50388	3.91234	1	0.0479329
OG0004636	0.2728	18	-2262.18	19	-2260.89	0.25671	0.55147	2.78572	2.57162	1	0.108796
OG0004608	0.0541	18	-2655.74	19	-2655.72	0.05475	0.04743	4.12706	0.046578	1	0.829129
OG0004688	0.35857	18	-3949.89	19	-3947.74	0.33502	0.71405	4.59245	4.29889	1	0.0381373
OG0004575	0.20212	18	-5266.08	19	-5266.05	0.20351	0.1877	4.67433	0.066004	1	0.797246
OG0004609	0.15471	18	-2771.95	19	-2771.42	0.14543	0.24437	5.21754	1.07801	1	0.299143
OG0004622	0.11966	18	-2720.47	19	-2720.46	0.11927	0.13058	3.84085	0.015044	1	0.902381
OG0004590	0.11328	18	-6258.33	19	-6258.33	0.1133	0.11302	4.3264	5.6e-05	1	0.994029
OG0004651	0.14082	18	-3550.94	19	-3550.85	0.13867	0.16335	2.95916	0.186908	1	0.665503
OG0004623	0.35773	18	-3919.33	19	-3919.33	0.35745	0.36346	2.8983	0.001204	1	0.97232
OG0004639	0.11599	18	-3004.45	19	-3003.78	0.11932	0.05254	2.22541	1.3282	1	0.249126
OG0004588	0.03627	18	-3377.57	19	-3377.44	0.03684	0.02227	2.08392	0.260888	1	0.609511
OG0004658	0.08004	18	-2780.47	19	-2780.46	0.07963	0.08819	7.34566	0.008044	1	0.928535
OG0004667	0.07212	18	-4479.64	19	-4477.81	0.06679	0.20878	4.13511	3.65429	1	0.055925
OG0004578	0.12697	18	-5754.91	19	-5746.58	0.14062	0.02411	4.71789	16.6576	1	4.4771e-05
OG0004605	0.15879	18	-6779.37	19	-6779.17	0.15596	0.18573	4.36166	0.403032	1	0.525528
OG0004642	0.18738	18	-5026.16	19	-5025.72	0.18192	0.23499	3.66642	0.890214	1	0.345419
OG0004657	0.08666	18	-2696.9	19	-2692.33	0.08016	1.46367	3.6822	9.14152	1	0.00249873
OG0004678	0.08185	18	-4754.24	19	-4753.31	0.08472	0.04212	4.45418	1.86512	1	0.172036
OG0004634	0.01308	18	-3251.25	19	-3250.39	0.01462	0.0001	5.06357	1.72345	1	0.18925
OG0004621	0.15509	18	-5865.1	19	-5865	0.1569	0.13568	2.7855	0.207026	1	0.649108
OG0004670	0.03548	18	-4969.87	19	-4969.59	0.03626	0.0245	5.51548	0.563518	1	0.452846
OG0004648	0.06479	18	-5971.89	19	-5971.59	0.06324	0.08361	4.6023	0.601748	1	0.437912
OG0004666	0.01471	18	-4279.38	19	-4278.7	0.01591	0.0001	5.82181	1.36103	1	0.243359
OG0004612	0.39605	18	-8223.33	19	-8220.09	0.37524	0.69357	3.67674	6.4747	1	0.0109421
OG0004633	0.06001	18	-3626.39	19	-3626.24	0.06132	0.04081	4.52713	0.30052	1	0.583557
OG0004583	0.00996	18	-5316.83	19	-5316.27	0.0091	0.02518	3.03981	1.12737	1	0.288338
OG0004653	0.14787	18	-7312.96	19	-7312.21	0.14381	0.19985	3.84378	1.50116	1	0.220492
OG0004674	0.03174	18	-3576.2	19	-3575.38	0.03257	0.0001	2.47939	1.64338	1	0.199862
OG0004644	0.04357	18	-2974.54	19	-2973.45	0.03935	0.10696	2.52715	2.17508	1	0.140262
OG0004675	0.10152	18	-5454.74	19	-5452.04	0.0959	0.19927	3.02889	5.40299	1	0.0201023
OG0004649	0.19952	18	-4707.22	19	-4706.48	0.20586	0.13113	3.72886	1.47511	1	0.224542
OG0004614	0.28499	18	-7204.18	19	-7203.25	0.29252	0.19476	2.82783	1.85987	1	0.17264
OG0004582	0.08433	18	-6018.44	19	-6018.03	0.08694	0.03628	2.67733	0.82135	1	0.364786
OG0004729	0.07622	18	-910.32	19	-910.32	0.07611	0.07766	4.58012	0.0003	1	0.986181
OG0004721	0.09091	18	-1657.69	19	-1656.98	0.08607	0.18632	3.85828	1.41119	1	0.234859
OG0004659	0.06492	18	-4445.7	19	-4443.39	0.06956	0.01232	6.26637	4.61349	1	0.0317215
OG0004717	0.51605	18	-1076.33	19	-1076.18	0.49919	0.75	4.98386	0.29792	1	0.585189
OG0004663	0.06756	18	-5495.91	19	-5495.9	0.06721	0.07229	4.00954	0.023922	1	0.877084
OG0004619	0.08533	18	-6510.17	19	-6509.86	0.08727	0.06167	3.95648	0.619846	1	0.431105
OG0004722	0.07362	18	-1521.63	19	-1519.16	0.06184	0.31255	2.96194	4.94225	1	0.0262079
OG0004731	0.16889	18	-2974.28	19	-2973.74	0.16333	0.28567	6.12887	1.08513	1	0.297552
OG0004725	0.00856	18	-2253.31	19	-2252.58	0.00924	0.0001	3.98347	1.46208	1	0.226599
OG0004682	0.02981	18	-4467.45	19	-4465.53	0.02794	0.09442	4.37879	3.83819	1	0.0500975
OG0004730	0.1441	18	-2621.64	19	-2621.18	0.13927	0.21966	4.01603	0.908566	1	0.340495
OG0004757	0.01461	18	-1160.42	19	-1154.83	0.00914	0.34726	6.20278	11.1939	1	0.000820648
OG0004744	0.01002	18	-971.627	19	-971.627	0.01002	0.84778	4.8319	-5.6e-05	1	invalid
OG0004736	0.15707	18	-1496.95	19	-1496.61	0.16254	0.06853	2.35158	0.665952	1	0.414466
OG0004732	0.168	18	-3461.41	19	-3461.34	0.16612	0.19402	3.90457	0.155054	1	0.693752
OG0004660	0.05383	18	-5739.79	19	-5736.22	0.04917	0.1167	3.19707	7.13448	1	0.00756154
OG0004723	0.05021	18	-2549.31	19	-2549.14	0.05153	0.02894	3.81609	0.325812	1	0.568136
OG0004680	0.27327	18	-7104.5	19	-7102.02	0.26454	0.61289	3.75006	4.94786	1	0.026123
OG0004692	0.20215	18	-2903.54	19	-2902.86	0.19366	0.30394	5.21857	1.36073	1	0.243411
OG0004652	0.14419	18	-8991.26	19	-8991.15	0.1453	0.1272	3.05394	0.226	1	0.634506
OG0004685	0.08673	18	-5857.42	19	-5857.4	0.08639	0.09486	3.0877	0.046308	1	0.829617
OG0004705	0.12479	18	-1814.92	19	-1814.34	0.11736	0.19144	3.83818	1.14543	1	0.284508
OG0004726	0.15904	18	-4426.39	19	-4425.82	0.15484	0.23521	3.87159	1.15376	1	0.282764
OG0004754	0.43995	18	-1613.26	19	-1612.79	0.42383	1.17452	4.23517	0.934332	1	0.33374
OG0004718	0.08923	18	-4260.11	19	-4259.77	0.087	0.11957	3.98802	0.668058	1	0.413729
OG0004631	0.06773	18	-5585.94	19	-5585.89	0.0673	0.08063	3.70455	0.08979	1	0.764444
OG0004755	0.03635	18	-1849.33	19	-1848.12	0.04014	0.0001	4.21733	2.42733	1	0.119236
OG0004693	0.00605	18	-1228.53	19	-1227.31	0.00426	0.04598	3.21577	2.44764	1	0.117702
OG0004760	0.1959	18	-3431.78	19	-3431.71	0.19421	0.23187	3.89651	0.140996	1	0.707293
OG0004727	0.04506	18	-3642.5	19	-3642.41	0.04427	0.05689	3.49074	0.176076	1	0.674767
OG0004697	0.08316	18	-3455.98	19	-3455.61	0.08922	0.02058	3.13073	0.752984	1	0.385533
OG0004713	0.09227	18	-2507.78	19	-2506.67	0.09802	0.0402	3.63959	2.21838	1	0.136376
OG0004775	0.08133	18	-2499.85	19	-2498.17	0.08728	0.0093	6.13257	3.3545	1	0.0670217
OG0004734	0.12781	18	-5484.18	19	-5484.03	0.13013	0.10646	4.73415	0.310156	1	0.577584
OG0004694	0.02018	18	-6188.75	19	-6188.75	0.02015	0.02069	5.53823	0.002344	1	0.961386
OG0004654	0.14626	18	-7686.63	19	-7685.9	0.14374	0.27148	2.7526	1.4598	1	0.226963
OG0004632	0.12479	18	-5945.3	19	-5945	0.12179	0.1536	5.14398	0.605282	1	0.43657
OG0004720	0.05345	18	-6206.05	19	-6205.64	0.05219	0.07692	4.70159	0.81573	1	0.366432
OG0004637	0.17079	18	-4938.26	19	-4937.72	0.17593	0.1247	4.29137	1.07781	1	0.299188
OG0004751	0.14956	18	-4031.73	19	-4031.28	0.15301	0.09814	3.0633	0.897618	1	0.343421
OG0004741	0.27007	18	-3910.2	19	-3909.75	0.27719	0.19067	3.07771	0.891034	1	0.345197
OG0004743	0.01137	18	-3195.34	19	-3194.4	0.01232	0.0001	5.88054	1.86781	1	0.171726
OG0004737	0.08869	18	-4648.39	19	-4646.73	0.0938	0.03127	3.40656	3.33244	1	0.0679259
OG0004702	0.02448	18	-2450.48	19	-2450.46	0.02474	0.02006	6.39605	0.040318	1	0.84086
OG0004711	0.03179	18	-4391	19	-4391	0.03187	0.0305	5.46951	0.004878	1	0.944319
OG0004589	0.22238	18	-9817.64	19	-9817.41	0.21933	0.26097	3.91304	0.465034	1	0.495281
OG0004748	0.0939	18	-4805.39	19	-4804.18	0.08972	0.15776	4.19273	2.41952	1	0.119832
OG0004703	0.13023	18	-4621.04	19	-4620.81	0.12735	0.16684	4.15999	0.46163	1	0.496863
OG0004746	0.11475	18	-5024.63	19	-5022.85	0.10845	0.19918	5.25136	3.55709	1	0.0592917
OG0004728	0.07274	18	-4925.75	19	-4925.67	0.07373	0.05897	4.00464	0.167314	1	0.68251
OG0004714	0.05475	18	-4613.17	19	-4612.7	0.0566	0.03364	2.65054	0.928708	1	0.335199
OG0004752	0.07711	18	-6074.75	19	-6071.42	0.07115	0.15114	4.30894	6.65519	1	0.00988674
OG0004646	0.08648	18	-5423.27	19	-5423.25	0.08589	0.09211	5.55956	0.045976	1	0.830219
OG0004701	0.04348	18	-5307.77	19	-5307.29	0.04512	0.02807	5.50019	0.961192	1	0.326887
OG0004753	0.17968	18	-5923.02	19	-5922.95	0.17806	0.20163	4.1031	0.148622	1	0.699856
OG0004716	0.07083	18	-3809.43	19	-3808.25	0.07458	0.01954	2.21644	2.34908	1	0.125357
OG0004739	0.11434	18	-4858.92	19	-4856.72	0.11853	0.02088	6.16889	4.39534	1	0.0360373
OG0004707	0.08772	18	-4769.78	19	-4750.25	0.06618	0.38782	4.0725	39.0709	1	0
OG0004699	0.0472	18	-5969.61	19	-5969.53	0.04677	0.06122	2.81007	0.159738	1	0.689398
OG0004798	0.10713	18	-2407.08	19	-2405.68	0.11442	0.03523	4.93066	2.80117	1	0.0941955
OG0004719	0.29898	18	-9334.39	19	-9334.18	0.30198	0.24894	3.52635	0.419248	1	0.517313
OG0004796	0.02438	18	-2364.38	19	-2364.35	0.02406	0.03085	2.69707	0.049182	1	0.824493
OG0004761	0.10764	18	-2962.96	19	-2962.79	0.10454	0.15781	3.84214	0.329302	1	0.56607
OG0004784	0.17291	18	-2065.18	19	-2063.77	0.18135	0.03675	2.84804	2.82731	1	0.0926734
OG0004740	0.0397	18	-5537.26	19	-5536.96	0.03852	0.05649	4.50498	0.599628	1	0.43872
OG0004641	0.12565	18	-5704.87	19	-5701.74	0.11369	0.29725	4.05221	6.24726	1	0.0124386
OG0004799	0.03255	18	-2941.42	19	-2941.11	0.03315	0.0001	2.78489	0.616272	1	0.432436
OG0004774	0.03499	18	-3860.21	19	-3859.52	0.0329	0.0602	2.19813	1.38039	1	0.240035
OG0004759	0.0935	18	-6168.04	19	-6167.78	0.09212	0.12369	3.51789	0.52585	1	0.468357
OG0004700	0.04965	18	-5904.77	19	-5904.02	0.04758	0.07948	7.73357	1.50615	1	0.219727
OG0004780	0.14713	18	-2438.55	19	-2438.55	0.14678	0.15085	3.76463	0.002688	1	0.958651
OG0004801	0.06953	18	-3228.3	19	-3228.26	0.07034	0.0585	6.02195	0.07599	1	0.782807
OG0004788	0.11036	18	-2657.02	19	-2657.02	0.11012	0.11355	4.3815	0.003026	1	0.956131
OG0004807	0.07336	18	-2331.62	19	-2329.8	0.06385	0.15431	1.76489	3.63444	1	0.0565958
OG0004811	0.15826	18	-4371.16	19	-4371.11	0.15708	0.17809	2.30651	0.10396	1	0.747128
OG0004782	0.13356	18	-3066.95	19	-3066.31	0.13747	0.0001	2.13243	1.2741	1	0.258999
OG0004787	0.05039	18	-4279	19	-4276.04	0.04459	0.12424	2.76883	5.92352	1	0.01494
OG0004776	0.03479	18	-4040.44	19	-4040.2	0.03567	0.0183	2.62515	0.486856	1	0.485333
OG0004802	0.01239	18	-3016.36	19	-3015.57	0.01307	0.0001	7.29663	1.5868	1	0.207784
OG0004823	0.02	18	-4604.09	19	-4603.78	0.02077	0.01207	5.82457	0.607036	1	0.435906
OG0004806	0.09317	18	-3592.77	19	-3591.46	0.10287	0.03411	3.47375	2.61925	1	0.105574
OG0004750	0.06448	18	-4911.17	19	-4911.1	0.06386	0.07916	2.33389	0.157318	1	0.691638
OG0004849	0.24554	18	-1829.75	19	-1829.11	0.26016	0.14829	2.83574	1.2893	1	0.256177
OG0004797	0.0256	18	-5281.76	19	-5280.67	0.02362	0.07054	2.3477	2.17161	1	0.140579
OG0004819	0.09378	18	-6060.36	19	-6057.93	0.08901	0.19616	3.07751	4.85475	1	0.0275702
OG0004810	0.0214	18	-5555.18	19	-5555.18	0.02131	0.02272	7.77278	0.010754	1	0.917406
OG0004890	0.24426	18	-1657.24	19	-1657.24	0.24362	0.25031	3.74751	0.002918	1	0.95692
OG0004792	0.16633	18	-5063.63	19	-5062.56	0.17511	0.1062	4.44777	2.14744	1	0.142808
OG0004816	0.11112	18	-5902.47	19	-5902.27	0.10975	0.13895	4.41511	0.397792	1	0.528232
OG0004851	0.00249	18	-1406.16	19	-1405.99	0.00272	0.0001	5.00958	0.334304	1	0.563136
OG0004837	0.0225	18	-1895.03	19	-1894.36	0.01985	0.04776		1.33734	1	0.247503
OG0004839	0.34053	18	-3493.49	19	-3493.49	0.34121	0.33468	2.77081	0.00373	1	0.9513
OG0004805	0.2364	18	-8989.64	19	-8988.07	0.22802	0.34266	4.53777	3.12716	1	0.0769977
OG0004834	0.0151	18	-1726.1	19	-1725.46	0.01661	0.0001	5.0106	1.27757	1	0.258351
OG0004881	0.04017	18	-2271.54	19	-2271.17	0.04244	0.01873	4.88033	0.733736	1	0.391675
OG0004885	0.08757	18	-3048.04	19	-3047.87	0.08931	0.06233	5.63855	0.34064	1	0.55946
OG0004844	0.14064	18	-1629.64	19	-1629.62	0.13925	0.15517	2.8896	0.029914	1	0.862686
OG0004899	0.11946	18	-1670.62	19	-1670.56	0.12067	0.08327	2.86842	0.10658	1	0.744072
OG0004898	0.05636	18	-1695.01	19	-1694.94	0.05503	0.07522	3.45974	0.13461	1	0.713699
OG0004846	0.36052	18	-3481.54	19	-3479.99	0.34281	0.67553	3.00186	3.10447	1	0.0780776
OG0004843	0.0001	18	-2143.38	19	-2143.38	0.0001	0.0001	6.64154	0	1	1
OG0004893	0.23611	18	-3459.03	19	-3459.01	0.23503	0.25339	3.12155	0.027606	1	0.868038
OG0004888	0.25124	18	-4359.73	19	-4359.6	0.2475	0.29046	3.29628	0.258276	1	0.611307
OG0004831	0.04028	18	-5212.95	19	-5212.57	0.04182	0.02785	5.68244	0.745436	1	0.387925
OG0004894	0.01024	18	-1989.42	19	-1988.89	0.01108	0.0001	4.71284	1.05053	1	0.305386
OG0004892	0.03938	18	-2339.91	19	-2339.73	0.0405	0.02251	3.83493	0.361046	1	0.547926
OG0004889	0.28939	18	-2089.92	19	-2089.56	0.27759	0.42078	4.52967	0.719318	1	0.396368
OG0004879	0.19369	18	-3885.4	19	-3885.23	0.19056	0.24835	3.52017	0.337806	1	0.561098
OG0004828	0.07094	18	-4140.06	19	-4140.06	0.07108	0.06969	4.21523	0.002206	1	0.962539
OG0004848	0.11839	18	-3537.91	19	-3537.64	0.11559	0.15507	5.02504	0.53967	1	0.46257
OG0004877	0.34708	18	-1665.65	19	-1664.87	0.33014	999	3.19452	1.5579	1	0.211973
OG0004863	0.02297	18	-1945.73	19	-1944.39	0.01886	0.05213	3.66366	2.6875	1	0.101138
OG0004878	0.15019	18	-3171.12	19	-3168.44	0.14101	0.51063	3.74809	5.35077	1	0.0207131
OG0004905	0.12836	18	-2828.86	19	-2828.84	0.12921	0.11628	4.5601	0.0421	1	0.837429
OG0004873	0.03002	18	-2158.28	19	-2157.89	0.03145	0.01359	4.83347	0.785736	1	0.375393
OG0004786	0.1654	18	-6937.59	19	-6935.13	0.1571	0.29106	6.18644	4.92609	1	0.0264542
OG0004904	0.05846	18	-2704.26	19	-2703.33	0.06383	0.0001	3.06628	1.86357	1	0.172213
OG0004900	0.01401	18	-3538.84	19	-3536.81	0.01247	0.06157	1.46661	4.05326	1	0.044086
OG0004826	0.06566	18	-5890.94	19	-5890.05	0.06785	0.0362	3.25797	1.77863	1	0.182317
OG0004871	0.18048	18	-2931.55	19	-2930.36	0.16984	0.31679	3.40909	2.37939	1	0.122946
OG0004864	0.0867	18	-1860.76	19	-1860.68	0.08449	0.10824	2.93855	0.15456	1	0.694215
OG0004777	0.08037	18	-6121.68	19	-6119.89	0.07823	0.24008	2.40971	3.57638	1	0.0586068
OG0004763	0.01549	18	-1076.36	19	-1075.02	0.01224	0.06808	3.79481	2.67518	1	0.101924
OG0004903	0.11913	18	-2424.75	19	-2423.91	0.12682	0.0501	3.33411	1.67343	1	0.195799
OG0004906	0.05181	18	-1757.92	19	-1757.89	0.05246	0.04036	2.50957	0.060436	1	0.805808
OG0004886	0.00946	18	-1704.87	19	-1704.72	0.00827	0.01665	2.02875	0.306502	1	0.579835
OG0004859	0.19264	18	-3167.6	19	-3167.12	0.18414	0.2566	3.58212	0.951458	1	0.329348
OG0004883	0.1213	18	-3981.29	19	-3978.77	0.13058	0.05088	5.41471	5.04857	1	0.0246462
OG0004765	0.16474	18	-2906.73	19	-2901.04	0.14638	0.71929	3.15067	11.3785	1	0.000743011
OG0004897	0.02208	18	-4438.99	19	-4437.47	0.02015	0.05528	7.98913	3.03913	1	0.0812795
OG0004857	0.01869	18	-1857.3	19	-1856.55	0.02042	0.0001	8.48898	1.51327	1	0.218641
OG0004868	0.02951	18	-2648.59	19	-2648.37	0.02829	0.04977	4.43769	0.435832	1	0.509141
OG0004858	0.05573	18	-3298.37	19	-3298.36	0.05544	0.05949	4.91295	0.013732	1	0.906715
OG0004867	0.36957	18	-5449.17	19	-5437.62	0.33067	1.43898	2.61742	23.09	1	1.546e-06
OG0004764	0.09971	18	-3338.61	19	-3338.61	0.10006	0.09382	4.53791	0.01551	1	0.900888
OG0004850	0.04578	18	-5616.37	19	-5612.47	0.04917	0.00639	4.67077	7.8096	1	0.00519695
OG0004861	0.05888	18	-3804.19	19	-3803.74	0.06091	0.02822	4.48951	0.898162	1	0.343275
OG0004855	0.03031	18	-3409.27	19	-3409.19	0.03095	0.02277	4.66246	0.173092	1	0.677378
OG0004841	0.08907	18	-6194.32	19	-6193.32	0.09241	0.05381	4.78107	2.01718	1	0.155527
OG0004829	0.25245	18	-7683.8	19	-7683.52	0.25668	0.21466	3.74536	0.547516	1	0.459334
OG0004865	0.0402	18	-3754.71	19	-3752.93	0.03808	0.17393	2.65619	3.54271	1	0.0598078
OG0004891	0.08502	18	-5085.37	19	-5085.36	0.08458	0.09169	4.85357	0.03334	1	0.855118
OG0004882	0.1387	18	-3595.7	19	-3590.12	0.12334	0.49953	4.41918	11.1568	1	0.000837239
OG0004917	0.06994	18	-767.196	19	-766.414	0.05532	0.20492	4.32828	1.56365	1	0.211132
OG0004790	0.23818	18	-5943.22	19	-5941.6	0.24753	0.12283	3.65634	3.23855	1	0.0719243
OG0004908	0.13578	18	-1579.94	19	-1578.67	0.14599	0.03479	4.2157	2.54649	1	0.11054
OG0004856	0.05169	18	-4460.69	19	-4460.33	0.05004	0.07139	4.45634	0.706672	1	0.400551
OG0004835	0.03195	18	-3801.04	19	-3801.02	0.03159	0.03751	3.02162	0.05197	1	0.81967
OG0004838	0.03029	18	-5842.64	19	-5842.63	0.0305	0.02801	5.16155	0.02881	1	0.865218
OG0004866	0.44245	18	-7459.35	19	-7459.33	0.44073	0.4648	3.33301	0.03339	1	0.85501
OG0004902	0.08437	18	-7398.7	19	-7398.67	0.08483	0.07773	4.56167	0.045274	1	0.831501
OG0004911	0.1131	18	-2860.91	19	-2858.1	0.10253	0.23179	3.42486	5.61736	1	0.0177834
OG0004870	0.05908	18	-3803.21	19	-3803.2	0.05947	0.054	4.31165	0.024354	1	0.875988
OG0004853	0.23589	18	-5858.37	19	-5858.17	0.23279	0.28858	2.39224	0.39212	1	0.531187
OG0004876	0.03085	18	-5227.38	19	-5225.85	0.02863	0.08015	1.7791	3.05077	1	0.080699
OG0004919	0.06222	18	-2180.97	19	-2180.3	0.06448	0.02184	2.69464	1.34488	1	0.246176
OG0004922	0.0001	18	-1569.34	19	-1569.34	0.0001	0.0001	2.37162	0	1	1
OG0004854	0.11019	18	-3291.45	19	-3283.56	0.08829	0.31488	3.02736	15.7793	1	7.1177e-05
OG0004766	0.12517	18	-4111.39	19	-4109.58	0.11827	0.27568	3.33954	3.62896	1	0.0567824
OG0004923	0.06639	18	-2004.19	19	-2004.11	0.06466	0.08251	4.2629	0.15988	1	0.689267
OG0004901	0.10321	18	-7163.76	19	-7163.51	0.10505	0.08513	5.06297	0.495112	1	0.481656
OG0004773	0.04156	18	-3808.7	19	-3808.68	0.04188	0.03679	4.49054	0.040756	1	0.84001
OG0004916	0.3137	18	-2181.56	19	-2180.25	0.28811	0.55625	3.27223	2.61831	1	0.105637
OG0004926	0.21193	18	-2291.71	19	-2289.4	0.22617	0.05278	3.84153	4.6144	1	0.0317045
OG0004981	0.00286	18	-1119.17	19	-1119.14	0.00294	0.0001	6.98375	0.051674	1	0.820176
OG0004914	0.02875	18	-2414.65	19	-2413.59	0.03084	0.0001	6.55765	2.1196	1	0.145424
OG0004912	0.11795	18	-2738.11	19	-2738.1	0.11837	0.11396	5.67053	0.005714	1	0.939744
OG0004913	0.03403	18	-3509.69	19	-3509.51	0.03499	0.02305	5.70431	0.372314	1	0.541746
OG0004959	0.16018	18	-1817.17	19	-1816.62	0.15004	0.25008	5.43036	1.09567	1	0.295218
OG0004976	0.04834	18	-2033.9	19	-2033.87	0.0475	0.0551	6.55818	0.046814	1	0.828703
OG0004944	0.16551	18	-3254.35	19	-3254.28	0.16732	0.14313	5.97065	0.13105	1	0.717346
OG0004927	0.39658	18	-3397.88	19	-3395.12	0.37089	1.02317	3.36734	5.51053	1	0.0189024
OG0004940	0.21411	18	-2854.08	19	-2852.22	0.22598	0.07088	3.86078	3.71667	1	0.0538716
OG0004943	0.04012	18	-2969.97	19	-2969.94	0.0405	0.03515	6.2273	0.047436	1	0.827586
OG0004920	0.0001	18	-2991.85	19	-2991.85	0.0001	0.0001	3.33847	0	1	1
OG0004964	0.01159	18	-2755.06	19	-2754.94	0.01091	0.01797	4.75486	0.227192	1	0.633614
OG0004967	0.1181	18	-2050.65	19	-2050.56	0.11535	0.15245	2.64006	0.180564	1	0.670889
OG0004951	0.08007	18	-3109.81	19	-3109.65	0.07803	0.10128	2.17933	0.302912	1	0.582063
OG0004977	0.02484	18	-2034.61	19	-2034.59	0.02523	0.02021	3.32162	0.04522	1	0.8316
OG0004948	0.07107	18	-4416.02	19	-4415.89	0.06996	0.08876	4.83547	0.25896	1	0.610836
OG0004942	0.15224	18	-3816.12	19	-3813.23	0.13909	0.32937	2.80339	5.76555	1	0.0163433
OG0004925	0.18841	18	-3117.47	19	-3117.39	0.18548	0.24031	3.99755	0.147314	1	0.701116
OG0004980	0.07337	18	-2770.72	19	-2768.65	0.07872	0.01474	4.10955	4.1243	1	0.0422716
OG0004973	0.1624	18	-2982.45	19	-2982.09	0.16788	0.11658	3.65539	0.714042	1	0.398105
OG0004915	0.02738	18	-4206.42	19	-4205.46	0.0288	0.0001	3.7537	1.91095	1	0.166858
OG0004930	0.10839	18	-3740.86	19	-3739.1	0.1152	0.04898	3.20017	3.5184	1	0.0606909
OG0004946	0.25454	18	-4243.51	19	-4243.25	0.24964	0.32085	3.59615	0.525568	1	0.468476
OG0004929	0.08416	18	-2821.97	19	-2821.97	0.08406	0.08504	4.20507	0.000604	1	0.980393
OG0004909	0.02321	18	-4556.89	19	-4556.88	0.02294	0.02826	3.99716	0.03616	1	0.849185
OG0004771	0.0734	18	-5302.05	19	-5301.57	0.07556	0.05109	4.10695	0.976018	1	0.323184
OG0004932	0.15818	18	-3208.18	19	-3206.34	0.16499	0.03026	3.31502	3.6895	1	0.054756
OG0004956	0.066	18	-3299.2	19	-3298.68	0.06804	0.02621	3.16161	1.04186	1	0.30739
OG0004979	0.06773	18	-2769.24	19	-2768.54	0.0639	0.15663	3.21855	1.38987	1	0.238428
OG0004938	0.20409	18	-4761.42	19	-4757.91	0.21369	0.04691	1.85565	7.00441	1	0.00813094
OG0004907	0.08894	18	-5642.66	19	-5642.38	0.0906	0.06535	6.22494	0.563204	1	0.452972
OG0004945	0.25181	18	-6873.76	19	-6872.17	0.26073	0.1578	3.74563	3.19255	1	0.0739746
OG0004994	0.17738	18	-1169.85	19	-1169.84	0.17638	0.18667	5.04782	0.00766	1	0.930257
OG0004762	0.08339	18	-4711.78	19	-4711.58	0.08531	0.06559	4.16936	0.389938	1	0.532332
OG0004933	0.07162	18	-2328.22	19	-2325.08	0.05738	0.19551	5.68708	6.26483	1	0.0123158
OG0004949	0.12329	18	-6575.84	19	-6557.5	0.10141	0.38143	3.68374	36.6878	1	1e-09
OG0004928	0.07476	18	-5811.3	19	-5811.06	0.07633	0.05828	7.24908	0.494894	1	0.481752
OG0004963	0.03165	18	-5122.69	19	-5120.96	0.02888	0.07718	3.31958	3.45807	1	0.0629437
OG0005039	0.07163	18	-1422.75	19	-1422.6	0.06989	0.10855	2.1105	0.314816	1	0.57474
OG0005017	0.09044	18	-1616.7	19	-1616.7	0.0906	0.08487	2.70592	0.003336	1	0.953941
OG0004991	0.01705	18	-1634.49	19	-1634.31	0.01606	0.03312	4.32166	0.357894	1	0.549678
OG0004958	0.17564	18	-3541.15	19	-3541.01	0.17249	0.21809	3.67419	0.280496	1	0.596376
OG0004954	0.12945	18	-4863.71	19	-4862.55	0.12363	0.22635	5.65377	2.31722	1	0.127949
OG0005006	0.09891	18	-1421.63	19	-1421.39	0.10426	0.06884	4.30172	0.485814	1	0.485801
OG0005033	0.11607	18	-3305.94	19	-3305.52	0.11998	0.0784	2.75393	0.832802	1	0.361464
OG0005013	0.35421	18	-2198.81	19	-2197.09	0.37723	0.13608	2.64929	3.44514	1	0.063438
OG0005037	0.08028	18	-1722.06	19	-1717.87	0.06818	0.93189	1.93401	8.38881	1	0.00377538
OG0004982	0.04007	18	-2107.65	19	-2107.24	0.04171	0.02133	3.69015	0.818176	1	0.365714
OG0005016	0.17488	18	-2035.96	19	-2035.87	0.17229	0.23475	2.67534	0.18795	1	0.664628
OG0005015	0.01033	18	-1125.92	19	-1125.79	0.0108	0.0001	2.22425	0.26064	1	0.609681
OG0005022	0.01939	18	-2312.61	19	-2311.17	0.02224	0.0001	4.98332	2.87962	1	0.089707
OG0004988	0.08899	18	-2605.25	19	-2605.18	0.09004	0.07002	5.43496	0.123222	1	0.725566
OG0004832	0.04455	18	-1940.14	19	-1938.03	0.04773	0.0001	2.02144	4.21094	1	0.0401642
OG0004993	0.05441	18	-1893.82	19	-1891.9	0.06041	0.0001	3.63013	3.85637	1	0.0495576
OG0005027	0.13334	18	-2545.85	19	-2545.82	0.13494	0.1202	5.27546	0.064374	1	0.799712
OG0004985	0.04542	18	-3259.71	19	-3257.76	0.04106	0.10219	4.63036	3.90783	1	0.0480615
OG0005024	0.15757	18	-2879.61	19	-2878.94	0.16446	0.09915	4.52531	1.34909	1	0.245437
OG0005035	0.16943	18	-3916.14	19	-3916.02	0.16679	0.19677	2.45464	0.243008	1	0.622042
OG0005000	0.04633	18	-4079.96	19	-4077.06	0.05061	0.00791	5.86071	5.80734	1	0.0159594
OG0005010	0.04993	18	-3065.2	19	-3065.14	0.04912	0.06005	6.03868	0.111252	1	0.738723
OG0005023	0.12734	18	-2865.23	19	-2864.03	0.1184	0.2391	6.42543	2.40154	1	0.121216
OG0005028	0.33384	18	-4341.81	19	-4341.3	0.34382	0.25013	2.78712	1.01481	1	0.313752
OG0005007	0.12053	18	-3869.35	19	-3868.64	0.12474	0.07533	3.5872	1.42038	1	0.233342
OG0004833	0.01215	18	-1601.85	19	-1599.57	0.00931	0.05837	5.69026	4.56131	1	0.0327021
OG0004989	0.06019	18	-3376.65	19	-3374.3	0.06664	0.01161	6.62289	4.68342	1	0.030455
OG0005034	0.0996	18	-5320.58	19	-5318.74	0.10467	0.04738	4.79011	3.68394	1	0.054939
OG0005030	0.20179	18	-3740.39	19	-3736.13	0.18214	0.4639	3.26571	8.51712	1	0.00351821
OG0005020	0.11963	18	-4225.86	19	-4225.48	0.12293	0.08797	5.03465	0.759946	1	0.383345
OG0005021	0.03771	18	-3591.7	19	-3591.21	0.03942	0.01978	4.61373	0.984922	1	0.320987
OG0004931	0.07685	18	-9313.11	19	-9312.1	0.07495	0.116	2.65451	2.01489	1	0.155763
OG0004955	0.12329	18	-6934.63	19	-6900.99	0.09165	0.68209	2.61325	67.2655	1	0
OG0004950	0.01376	18	-5373.43	19	-5373.37	0.01349	0.01714	4.59541	0.135224	1	0.713076
OG0004996	0.14402	18	-5519.02	19	-5517.7	0.13778	0.22633	4.22825	2.65769	1	0.103051
OG0005038	0.06202	18	-5799.79	19	-5797.69	0.06572	0.01827	4.65634	4.19668	1	0.0405031
OG0004984	0.0326	18	-5572.59	19	-5569.46	0.02887	0.09321	2.98454	6.26351	1	0.012325
OG0005031	0.03625	18	-4243.81	19	-4243.8	0.03651	0.03287	5.21149	0.027584	1	0.868091
OG0004995	0.02978	18	-3598.75	19	-3597.09	0.03249	0.0001	2.98007	3.31819	1	0.0685172
OG0005009	0.1274	18	-5325.95	19	-5325.89	0.1286	0.11373	3.79165	0.124072	1	0.724659
OG0005043	0.01757	18	-3256.35	19	-3256.3	0.01711	0.02233	4.39198	0.108186	1	0.742219
OG0005103	0.29412	18	-2840.79	19	-2840.65	0.30028	0.24384	4.01204	0.28558	1	0.593067
OG0005014	0.03696	18	-2795.56	19	-2795.55	0.03735	0.03209	3.44047	0.023154	1	0.879057
OG0005101	0.49854	18	-3287.46	19	-3287	0.48131	0.66841	1.82947	0.92682	1	0.335691
OG0005012	0.02264	18	-4402.36	19	-4401.35	0.02414	0.0001	3.40127	2.01502	1	0.15575
OG0005090	0.24527	18	-1573.95	19	-1571.3	0.22361	0.99848	2.05106	5.30685	1	0.0212418
OG0005057	0.04539	18	-1549.05	19	-1549.03	0.04581	0.03749	4.50749	0.03514	1	0.851303
OG0005100	0.27452	18	-2516.53	19	-2513.53	0.24597	0.6671	3.21683	6.00213	1	0.0142886
OG0005036	0.08727	18	-4927.51	19	-4927.49	0.0882	0.08014	6.94481	0.045444	1	0.83119
OG0005019	0.31577	18	-7684.32	19	-7684.31	0.31671	0.30311	3.95441	0.026326	1	0.871107
OG0005059	0.01755	18	-2332.55	19	-2332.53	0.01772	0.015	4.14778	0.025184	1	0.873909
OG0005029	0.21316	18	-5104.94	19	-5104	0.21747	0.09198	2.51704	1.87432	1	0.170981
OG0005094	0.22622	18	-2604.78	19	-2600.75	0.20201	0.71379	5.1118	8.05105	1	0.00454773
OG0004999	0.01127	18	-6035.06	19	-6035.05	0.01135	0.01006	2.03438	0.016274	1	0.89849
OG0005104	0.28823	18	-3742.59	19	-3739.56	0.30851	0.07618	3.50859	6.04451	1	0.0139496
OG0005054	0.19215	18	-1726.8	19	-1724.8	0.17014	0.57937	2.54526	4.00191	1	0.0454488
OG0004934	0.07722	18	-2307.73	19	-2307.71	0.07653	0.08714	4.06174	0.045508	1	0.831073
OG0005070	0.23487	18	-3872.21	19	-3870.18	0.22362	0.47432	2.43616	4.0743	1	0.0435402
OG0005053	0.12878	18	-3596.93	19	-3593.69	0.1404	0.0471	3.87313	6.49241	1	0.0108336
OG0005093	0.23946	18	-3761.87	19	-3761.23	0.2474	0.15539	4.03054	1.28957	1	0.256127
OG0005107	0.14814	18	-3129.91	19	-3129.5	0.15346	0.11021	4.65673	0.818312	1	0.365674
OG0005067	0.03825	18	-2635.19	19	-2634.47	0.0398	0.0001	2.27873	1.44807	1	0.228839
OG0005032	0.0744	18	-5188.84	19	-5187.96	0.07629	0.00887	2.92639	1.76081	1	0.184524
OG0004971	0.07414	18	-6952.94	19	-6952.94	0.0739	0.07755	4.01742	0.006734	1	0.934598
OG0005064	0.02755	18	-3808.43	19	-3808.25	0.02672	0.03811	6.38821	0.361878	1	0.547465
OG0005060	0.06329	18	-3390.41	19	-3389.49	0.05978	0.11344	5.17493	1.84286	1	0.174616
OG0005045	0.04631	18	-6710.42	19	-6709.93	0.04492	0.06618	5.28274	0.972658	1	0.324018
OG0005073	0.06849	18	-4300.12	19	-4299.26	0.07101	0.02891	5.07851	1.71244	1	0.19067
OG0004987	0.13398	18	-5495.33	19	-5494.96	0.13815	0.10331	3.94135	0.739042	1	0.389968
OG0005087	0.17409	18	-3418.14	19	-3418.02	0.17628	0.13558	4.11012	0.23989	1	0.624286
OG0005084	0.03046	18	-3638.48	19	-3637.99	0.029	0.05029	4.25588	0.977328	1	0.322859
OG0005046	0.03978	18	-4944.93	19	-4944.91	0.04009	0.0365	3.9917	0.033024	1	0.855798
OG0005066	0.07027	18	-5730.93	19	-5730.82	0.06921	0.08285	4.25606	0.216516	1	0.641707
OG0005102	0.06403	18	-3757.93	19	-3757.83	0.06301	0.07786	5.42801	0.208254	1	0.648139
OG0005052	0.09104	18	-3653.67	19	-3653.54	0.08942	0.11401	4.26732	0.247602	1	0.618769
OG0005099	0.16251	18	-6304.05	19	-6295.31	0.14301	0.33482	3.94849	17.4645	1	2.9272e-05
OG0005083	0.03308	18	-3910.6	19	-3910.57	0.03267	0.04088	4.41315	0.076692	1	0.781831
OG0005042	0.19014	18	-4850.57	19	-4848.67	0.19887	0.08837	4.01806	3.80339	1	0.0511491
OG0005082	0.44583	18	-2852.83	19	-2851.21	0.41488	999	2.32536	3.23028	1	0.0722882
OG0004952	0.07236	18	-7656.83	19	-7656.55	0.07114	0.125	3.05225	0.555168	1	0.456214
OG0005092	0.03391	18	-4389.58	19	-4389.52	0.03445	0.0276	4.52229	0.130898	1	0.717503
OG0005086	0.00771	18	-3968.13	19	-3968.08	0.0081	0.00302	7.2965	0.098248	1	0.753942
OG0005080	0.16757	18	-3631.51	19	-3623.64	0.14503	0.52073	3.25808	15.7304	1	7.3042e-05
OG0005074	0.09849	18	-4396.89	19	-4396.63	0.09616	0.13188	4.32918	0.522822	1	0.46964
OG0005072	0.07408	18	-5308.95	19	-5307.1	0.06896	0.12621	4.51736	3.70846	1	0.0541373
OG0005051	0.10652	18	-4348.23	19	-4346.34	0.09805	0.24561	3.90608	3.79207	1	0.0514961
OG0004767	0.09113	18	-6338.89	19	-6338.67	0.08961	0.11444	2.98042	0.444412	1	0.505001
OG0005076	0.04145	18	-4682.15	19	-4681.96	0.04259	0.02703	5.1875	0.373566	1	0.541067
OG0005077	0.08555	18	-4107.88	19	-4107.27	0.08811	0.05112	4.2571	1.21813	1	0.269728
OG0005112	0.02102	18	-1797.15	19	-1796.8	0.02182	0.0001	4.00854	0.708492	1	0.399945
OG0005105	0.02694	18	-1851.1	19	-1851	0.0277	0.01767	3.83708	0.196764	1	0.657346
OG0005089	0.08627	18	-7564.51	19	-7564.07	0.08466	0.11922	5.01403	0.884006	1	0.347107
OG0005048	0.14418	18	-6713.19	19	-6707.58	0.15559	0.04268	4.23409	11.2148	1	0.000811484
OG0005049	0.24351	18	-6759.51	19	-6759.51	0.24371	0.24149	4.62039	0.001192	1	0.972458
OG0005081	0.1034	18	-6566.76	19	-6566.75	0.10303	0.10728	4.21317	0.019092	1	0.890103
OG0005126	0.02806	18	-2042.69	19	-2042.61	0.02864	0.0189	2.1121	0.167616	1	0.682239
OG0005106	0.04277	18	-6953.86	19	-6953.83	0.04303	0.03793	2.64442	0.059202	1	0.807762
OG0005088	0.3573	18	-7788.39	19	-7787.63	0.34934	0.518	2.96479	1.51458	1	0.218442
OG0005091	0.01814	18	-6484.07	19	-6483.1	0.019	0.0001	2.70169	1.94459	1	0.163171
OG0005123	0.02083	18	-1560.96	19	-1560.94	0.02059	0.02576	2.54693	0.039464	1	0.842532
OG0005111	0.32212	18	-6546.72	19	-6545.25	0.31042	0.50783	2.43272	2.92456	1	0.0872412
OG0005004	0.04448	18	-2560.78	19	-2560.57	0.04339	0.06915	4.53901	0.429144	1	0.512409
OG0005056	0.06939	18	-6010.13	19	-6010.07	0.06885	0.08341	3.4079	0.112654	1	0.737143
OG0005130	0.28428	18	-5152.66	19	-5152.59	0.28125	0.31629	3.01568	0.143354	1	0.704969
OG0005001	0.04962	18	-2251.24	19	-2250.72	0.05149	0.01985	6.73361	1.04451	1	0.306775
OG0005116	0.03751	18	-2394.82	19	-2394.82	0.03749	0.03765	3.07117	4.4e-05	1	0.994707
OG0005113	0.01255	18	-5126.63	19	-5125.55	0.01336	0.0001	3.29758	2.17045	1	0.140685
OG0004990	0.01677	18	-4288.71	19	-4287.68	0.01814	0.0001	2.63283	2.06251	1	0.150962
OG0005124	0.15788	18	-4913.41	19	-4910.15	0.14338	0.30677	5.17385	6.51944	1	0.0106701
OG0005128	0.04863	18	-2926.24	19	-2924.08	0.05306	0.0001	5.65203	4.31632	1	0.0377486
OG0005119	0.02363	18	-4067.46	19	-4067.4	0.02314	0.033	3.7732	0.127018	1	0.721544
OG0005109	0.00877	18	-2386.4	19	-2386.12	0.00929	0.0001	3.51155	0.56049	1	0.454063
OG0005110	0.05225	18	-4399.79	19	-4399.58	0.05338	0.03893	4.52416	0.424738	1	0.514582
OG0005203	0.05718	18	-1496.72	19	-1493.98	0.06403	0.0001	5.46746	5.46955	1	0.0193506
OG0005108	0.08481	18	-6563.12	19	-6562.64	0.08613	0.05499	2.49038	0.966758	1	0.32549
OG0005155	0.00815	18	-1786.52	19	-1786.13	0.00883	0.0001	3.46226	0.775518	1	0.378515
OG0005193	0.03993	18	-2861.51	19	-2861.3	0.04093	0.02559	5.37429	0.405616	1	0.524203
OG0005005	0.02496	18	-2409.4	19	-2409.16	0.02636	0.01356	4.15518	0.466772	1	0.494476
OG0005003	0.08185	18	-4155.58	19	-4155.05	0.0843	0.05001	3.65391	1.07229	1	0.300428
OG0005131	0.18454	18	-3967.6	19	-3966.84	0.18949	0.08545	2.64978	1.50598	1	0.219754
OG0005186	0.00952	18	-1593.73	19	-1593.24	0.01012	0.0001	7.17602	0.978848	1	0.322483
OG0005164	0.33943	18	-1755.8	19	-1755.69	0.34829	0.2503	2.09989	0.218614	1	0.640098
OG0005163	0.03207	18	-2763.17	19	-2760.72	0.02694	0.11101	4.60292	4.91437	1	0.0266342
OG0005202	0.01268	18	-1031.51	19	-1028.34	0.00662	0.14886	2.79934	6.33675	1	0.0118261
OG0005117	0.06721	18	-5827.74	19	-5827.56	0.06616	0.08734	3.16917	0.365062	1	0.545708
OG0005178	0.24416	18	-2595.37	19	-2594.34	0.23002	0.41019	4.95457	2.06117	1	0.151094
OG0005118	0.01971	18	-4392.98	19	-4391.98	0.02118	0.00163	4.10775	2.00197	1	0.157095
OG0005125	0.08248	18	-6441.95	19	-6441.95	0.0824	0.08336	5.97827	0.000952	1	0.975386
OG0005136	0.10127	18	-2223.05	19	-2219.95	0.08508	0.31469	3.62085	6.20232	1	0.0127583
OG0005121	0.04944	18	-5339.71	19	-5339.23	0.04822	0.07424	3.73968	0.964918	1	0.325951
OG0005063	0.086	18	-2499.93	19	-2499.77	0.088	0.06655	3.18845	0.326116	1	0.567955
OG0005135	0.03453	18	-4053.18	19	-4052.72	0.0328	0.05241	5.77698	0.92558	1	0.336014
OG0005133	0.02796	18	-2809.73	19	-2809.57	0.02686	0.04392	9.08275	0.333006	1	0.563894
OG0005162	0.13069	18	-2655.01	19	-2654.65	0.13427	0.08154	5.18503	0.712972	1	0.398459
OG0005167	0.10624	18	-1772.65	19	-1771.03	0.09599	0.3445	3.31457	3.23473	1	0.0720922
OG0005146	0.03913	18	-3338.53	19	-3338.53	0.0392	0.03797	7.02507	0.002436	1	0.960636
OG0005144	0.02421	18	-3185.78	19	-3185.03	0.02536	0.00858	5.55736	1.49731	1	0.221086
OG0005169	0.02417	18	-2355.99	19	-2354.98	0.02583	0.0001	2.97609	2.02132	1	0.155104
OG0005181	0.13591	18	-2872.35	19	-2872.35	0.13572	0.13758	3.8498	0.001286	1	0.971393
OG0004770	0.06887	18	-6342.66	19	-6342.64	0.06853	0.0773	4.004	0.033552	1	0.854663
OG0005168	0.1839	18	-2875.49	19	-2868.41	0.21011	0.02158	4.3706	14.1506	1	0.000168745
OG0005184	0.08297	18	-2619.63	19	-2619.58	0.08196	0.09384	2.50307	0.086392	1	0.768815
OG0005156	0.04829	18	-2130.23	19	-2130.16	0.04952	0.03326	3.48324	0.145236	1	0.70313
OG0005192	0.06571	18	-2277.83	19	-2275.82	0.04529	0.35527	5.34085	4.02561	1	0.0448144
OG0005197	0.08479	18	-3475.26	19	-3474.94	0.08696	0.05926	5.31867	0.6233	1	0.429824
OG0005207	0.0901	18	-4163.23	19	-4163.05	0.0916	0.06953	3.55019	0.353706	1	0.552023
OG0005177	0.03994	18	-2794.14	19	-2793.69	0.04143	0.01709	4.00849	0.912668	1	0.339408
OG0005204	0.07671	18	-3181.12	19	-3179.37	0.08548	0.02577	3.87533	3.49116	1	0.0616975
OG0005161	0.09088	18	-2310.85	19	-2310.68	0.09255	0.05103	2.04534	0.340004	1	0.559827
OG0005160	0.29063	18	-5257.51	19	-5256.16	0.30298	0.17889	2.98057	2.7003	1	0.10033
OG0005187	0.08749	18	-2459.31	19	-2459.31	0.0877	0.08513	3.90943	0.00338	1	0.953639
OG0005166	0.4142	18	-4944.88	19	-4942.73	0.39242	0.75035	4.59413	4.29709	1	0.0381776
OG0005205	0.12398	18	-4103.45	19	-4103.37	0.12539	0.10297	4.88201	0.154564	1	0.694211
OG0005139	0.01291	18	-2756.83	19	-2753.92	0.00957	0.05583	5.78477	5.8222	1	0.0158251
OG0005175	0.19895	18	-5124.88	19	-5124.87	0.19824	0.20683	3.26977	0.020116	1	0.887214
OG0005152	0.05606	18	-2954.65	19	-2952.44	0.06027	0.0001	3.45744	4.42235	1	0.0354712
OG0005153	0.06754	18	-3973.14	19	-3973.1	0.06707	0.0792	1.5372	0.078592	1	0.779215
OG0005210	0.06998	18	-3998.64	19	-3998.61	0.07062	0.06377	5.15724	0.055698	1	0.813429
OG0005180	0.09542	18	-3116.91	19	-3116.91	0.09528	0.09714	5.91862	0.001384	1	0.970324
OG0005196	0.06802	18	-4266.86	19	-4259.55	0.0593	0.25132	4.55285	14.6216	1	0.000131399
OG0005115	0.23794	18	-6099.92	19	-6099.03	0.23362	0.50241	4.0224	1.76307	1	0.184242
OG0005200	0.04175	18	-4947.38	19	-4947.05	0.0427	0.02782	4.82601	0.6599	1	0.416595
OG0005201	0.05006	18	-4316.21	19	-4315.92	0.05119	0.02945	4.1163	0.577982	1	0.447104
OG0005174	0.06985	18	-5441.45	19	-5441.44	0.06963	0.07294	5.87078	0.01165	1	0.914047
OG0005284	0.30483	18	-1604.55	19	-1604.3	0.31597	0.22594	3.08437	0.499116	1	0.479889
OG0005061	0.04776	18	-3369.6	19	-3365.69	0.0523	0.0001	3.753	7.81382	1	0.00518482
OG0005239	0.05187	18	-1991.95	19	-1991.42	0.05416	0.02061	4.50804	1.05376	1	0.304644
OG0005141	0.06567	18	-4748.83	19	-4748.39	0.06343	0.10242	4.26848	0.884058	1	0.347093
OG0005142	0.15678	18	-5150.81	19	-5150.78	0.15771	0.13729	4.05492	0.07033	1	0.790857
OG0005134	0.15585	18	-4510.13	19	-4509.39	0.15061	0.23876	4.16906	1.48204	1	0.223456
OG0005195	0.01195	18	-4108.98	19	-4108.98	0.01192	0.01249	3.43432	0.001932	1	0.964941
OG0005132	0.26568	18	-8014.38	19	-8013.88	0.27082	0.20597	3.28263	0.989688	1	0.319819
OG0005272	0.04305	18	-1464.79	19	-1464.79	0.04306	0.04285	4.47936	1.6e-05	1	0.996808
OG0005137	0.04788	18	-4205.87	19	-4205.83	0.04844	0.04074	2.89394	0.07759	1	0.78059
OG0005222	0.0171	18	-1632.49	19	-1632.43	0.01629	0.02423		0.112384	1	0.737446
OG0005259	0.06705	18	-2453.12	19	-2452.19	0.07094	0.02763	4.92808	1.84885	1	0.173917
OG0005234	0.0086	18	-1326.86	19	-1326.7	0.00932	0.0001		0.312082	1	0.576405
OG0005267	0.06652	18	-1150.51	19	-1149.88	0.07358	0.0001	3.37989	1.26936	1	0.259886
OG0005191	0.03012	18	-6020.28	19	-6020.08	0.02941	0.04242	2.11557	0.397982	1	0.528133
OG0005221	0.04467	18	-2673.73	19	-2673.55	0.04295	0.07168	3.294	0.355734	1	0.550885
OG0005232	0.08313	18	-3607.56	19	-3606.41	0.08759	0.03432	3.479	2.31252	1	0.128336
OG0005165	0.01365	18	-4592.3	19	-4592.15	0.01324	0.02064	2.41465	0.30226	1	0.582469
OG0005276	0.0087	18	-1974.93	19	-1974.71	0.00936	0.0001	3.72874	0.431848	1	0.511084
OG0005209	0.15291	18	-4214.57	19	-4214.11	0.14826	0.21122	6.83532	0.921214	1	0.337156
OG0005229	0.0332	18	-3855.56	19	-3854.95	0.03468	0.01282	7.39243	1.21957	1	0.269446
OG0005231	0.01646	18	-2595.19	19	-2591.14	0.01291	0.08359	4.74407	8.08237	1	0.00446981
OG0005228	0.11401	18	-3182.84	19	-3182.17	0.11077	0.23034	3.76571	1.33523	1	0.247876
OG0005281	0.19635	18	-2965.92	19	-2965.74	0.19187	0.24588	3.6591	0.372056	1	0.541886
OG0005280	0.01766	18	-1738.64	19	-1738.64	0.0176	0.0186	4.05146	0.002588	1	0.959427
OG0005251	0.06213	18	-3264.7	19	-3264.09	0.05904	0.10623	6.13429	1.2203	1	0.269302
OG0005188	0.03802	18	-4359.29	19	-4358.21	0.03486	0.35653	3.93103	2.17611	1	0.140168
OG0005170	0.1282	18	-5978.4	19	-5974.76	0.11811	0.26419	4.53196	7.28087	1	0.00696927
OG0005263	0.06694	18	-2620.97	19	-2620.87	0.06539	0.08392	7.05288	0.206346	1	0.649647
OG0005282	0.06949	18	-3517.24	19	-3517.23	0.06927	0.07221	4.98085	0.00826	1	0.927584
OG0005252	0.17513	18	-3628.97	19	-3628.04	0.16665	0.28243	4.13263	1.87007	1	0.171467
OG0005158	0.31854	18	-8766.52	19	-8763.41	0.30051	0.56179	4.64782	6.23088	1	0.0125541
OG0005138	0.27921	18	-10551.7	19	-10551.3	0.27546	0.33782	3.18749	0.761336	1	0.382911
OG0005265	0.08673	18	-2068.78	19	-2068.77	0.08624	0.10219	2.53359	0.023568	1	0.877989
OG0005185	0.123	18	-4623.42	19	-4623.32	0.12489	0.09431	2.50877	0.184476	1	0.667555
OG0005215	0.16707	18	-4907.99	19	-4907.85	0.16522	0.20487	2.96154	0.28582	1	0.592912
OG0005143	0.18808	18	-7555.52	19	-7554.98	0.18375	0.24346	3.61503	1.07734	1	0.299292
OG0005253	0.034	18	-3182.06	19	-3181.85	0.0323	0.05585	4.60983	0.41704	1	0.518418
OG0005279	0.02072	18	-2717.47	19	-2716.79	0.01931	0.04521	8.11029	1.35544	1	0.244329
OG0005268	0.14443	18	-3405.06	19	-3403.72	0.15461	0.03576	3.10931	2.67267	1	0.102085
OG0005224	0.04502	18	-3852.5	19	-3852.49	0.04528	0.04275	3.65945	0.01619	1	0.898751
OG0005230	0.16018	18	-3788.1	19	-3788.06	0.16153	0.13757	2.83253	0.083258	1	0.77293
OG0005233	0.03221	18	-2932.14	19	-2931.49	0.03331	0.0001	4.29047	1.30011	1	0.254194
OG0005248	0.09422	18	-5340.89	19	-5340.28	0.09617	0.05892	3.47399	1.22125	1	0.269115
OG0005176	0.13862	18	-8777.48	19	-8776.53	0.1349	0.1919	2.53155	1.91334	1	0.166592
OG0005216	0.14303	18	-3836.31	19	-3836.29	0.14377	0.12415	2.4389	0.044688	1	0.832579
OG0005303	0.20352	18	-1660.4	19	-1656.76	0.17491	0.5803	2.98846	7.26632	1	0.00702595
OG0005235	0.13628	18	-6084.69	19	-6080.27	0.1444	0.03771	2.97269	8.83072	1	0.00296202
OG0005286	0.06717	18	-3695.15	19	-3693.98	0.06268	0.10568	4.53318	2.34485	1	0.125698
OG0005211	0.19863	18	-6483.97	19	-6483.27	0.20487	0.14721	3.8581	1.40977	1	0.235095
OG0005277	0.38929	18	-9044.94	19	-9044.38	0.3977	0.31354	3.45786	1.11605	1	0.29077
OG0005258	0.22488	18	-5378.68	19	-5377.91	0.21767	0.33131	2.83162	1.54362	1	0.21408
OG0005313	0.02316	18	-1593.92	19	-1593.58	0.02396	0.0001	4.10131	0.681792	1	0.40897
OG0005151	0.28427	18	-10073.3	19	-10069.7	0.27237	0.50465	3.01487	7.27719	1	0.00698358
OG0005157	0.04191	18	-5540.21	19	-5539.56	0.04366	0.01765	2.95183	1.28941	1	0.256156
OG0005332	0.0783	18	-1259.86	19	-1259.86	0.0783	0.07835	2.28474	2e-06	1	0.998872
OG0005300	0.09998	18	-4232.43	19	-4232.25	0.09786	0.12057	5.65995	0.350482	1	0.55384
OG0005340	0.05807	18	-2255.11	19	-2254.93	0.05642	0.07978	3.40484	0.37285	1	0.541455
OG0005302	0.04762	18	-3132.82	19	-3130.37	0.051	0.0001	4.16367	4.89975	1	0.0268606
OG0005242	0.35399	18	-9268.66	19	-9268.56	0.35718	0.32349	5.54671	0.200706	1	0.654152
OG0005245	0.03482	18	-1939.31	19	-1938.21	0.03657	0.0001	4.58169	2.19998	1	0.138013
OG0005299	0.14757	18	-3598.57	19	-3596.76	0.13842	0.35385	2.99584	3.62587	1	0.0568878
OG0005269	0.02861	18	-6238.24	19	-6234.47	0.02564	0.12316	2.51696	7.53755	1	0.00604262
OG0005283	0.08011	18	-6165.89	19	-6165.89	0.08012	0.07993	5.45332	5.4e-05	1	0.994137
OG0005334	0.08102	18	-2354.76	19	-2354.74	0.08012	0.08906	4.8282	0.035416	1	0.850727
OG0005319	0.22765	18	-2706.96	19	-2706.36	0.21679	0.32755	3.90491	1.1929	1	0.274745
OG0005274	0.02605	18	-6541.91	19	-6541.31	0.0252	0.04582	5.26952	1.21503	1	0.270338
OG0005227	0.03331	18	-6796.33	19	-6796.03	0.03411	0.02283	5.14129	0.609576	1	0.434947
OG0005328	0.01286	18	-3385.19	19	-3384.79	0.01212	0.02613	7.6116	0.800032	1	0.371084
OG0005149	0.03202	18	-4151.62	19	-4151.12	0.03048	0.05117	4.25081	1.00495	1	0.316117
OG0005298	0.08017	18	-3545	19	-3545	0.08006	0.08205	1.96549	0.001906	1	0.965177
OG0005291	0.03044	18	-3795.7	19	-3795.16	0.02901	0.05546	5.68568	1.08946	1	0.296591
OG0005339	0.13491	18	-3912.16	19	-3912	0.13188	0.15742	4.79798	0.326458	1	0.567752
OG0005306	0.03168	18	-3769.3	19	-3769.09	0.03068	0.04244	5.51178	0.43177	1	0.511122
OG0005318	0.10751	18	-4385.07	19	-4383.89	0.10296	0.20434	4.68364	2.34974	1	0.125304
OG0005262	0.12902	18	-7638.79	19	-7638.75	0.12829	0.14389	4.18867	0.091248	1	0.762597
OG0005246	0.05506	18	-3921.52	19	-3921.51	0.05477	0.0586	5.67685	0.016568	1	0.897582
OG0005290	0.00113	18	-1685.48	19	-1685.44	0.00113	0.0001	3.93347	0.090032	1	0.764136
OG0005322	0.11628	18	-4978.29	19	-4978.28	0.11586	0.12277	3.27291	0.017278	1	0.895423
OG0005307	0.14681	18	-5842.71	19	-5842.62	0.14531	0.16579	4.92228	0.178856	1	0.672358
OG0005315	0.05281	18	-5268.41	19	-5268.31	0.05346	0.04036	6.03409	0.204232	1	0.651326
OG0005270	0.05591	18	-3402.83	19	-3402.81	0.05544	0.06645	2.53467	0.048406	1	0.825861
OG0005329	0.10924	18	-4855.53	19	-4855.06	0.11264	0.08214	5.48394	0.934546	1	0.333684
OG0005305	0.03688	18	-3434.67	19	-3434.32	0.03845	0.01829	4.37426	0.684328	1	0.4081
OG0005317	0.09903	18	-5817.66	19	-5814.93	0.09214	0.18179	2.43866	5.45777	1	0.0194815
OG0005250	0.06506	18	-3360.97	19	-3360.15	0.06883	0.0001	5.60674	1.64032	1	0.200281
OG0005148	0.13407	18	-5683.17	19	-5678.69	0.1229	0.27271	3.37427	8.9554	1	0.00276651
OG0005321	0.04575	18	-4180.39	19	-4180.33	0.04634	0.03794	5.41804	0.128308	1	0.720193
OG0005312	0.03658	18	-4360.11	19	-4360	0.03571	0.04879	3.5282	0.216792	1	0.641495
OG0005314	0.04119	18	-4176.79	19	-4176.76	0.04083	0.04743	6.21568	0.05109	1	0.821177
OG0005379	0.066	18	-963.352	19	-962.47	0.07196	0.0001	5.58685	1.76435	1	0.184083
OG0005311	0.03816	18	-4884.97	19	-4883.01	0.04124	0.01203	5.29647	3.92782	1	0.0474934
OG0005206	0.03683	18	-5704.25	19	-5704.16	0.03608	0.04484	5.93714	0.192178	1	0.66111
OG0005348	0.02384	18	-1597.28	19	-1596.95	0.02554	0.0001	4.03375	0.660652	1	0.41633
OG0005366	0.01049	18	-941.151	19	-941.151	0.01049	0.98478	4.33918	-4.8e-05	1	invalid
OG0005292	0.07263	18	-7456.8	19	-7518.17	0.0752	0.14213	4.02562	-122.759	1	invalid
OG0005316	0.05812	18	-4301.8	19	-4301.75	0.05747	0.06828	3.06253	0.104766	1	0.746184
OG0005362	0.8086	18	-2226.8	19	-2226.73	0.7928	0.95661	2.90852	0.150794	1	0.697778
OG0005287	0.20029	18	-5846.68	19	-5846.63	0.19924	0.2291	2.69136	0.102586	1	0.748748
OG0005376	0.38378	18	-2020.72	19	-2019.66	0.40234	0.17143	3.012	2.10798	1	0.146533
OG0005310	0.10589	18	-3991.74	19	-3989.8	0.0992	0.24761	4.53056	3.88087	1	0.0488393
OG0005341	0.18707	18	-2964.37	19	-2963.4	0.19542	0.09993	5.09723	1.93904	1	0.163773
OG0005359	0.27274	18	-4144.11	19	-4142.15	0.25305	0.42808	3.23213	3.9161	1	0.0478258
OG0005244	0.07289	18	-6262.29	19	-6261.98	0.07456	0.05097	3.62685	0.633176	1	0.426193
OG0005324	0.01741	18	-3061.21	19	-3060.97	0.01808	0.00928	2.50381	0.487718	1	0.484947
OG0005326	0.22831	18	-7566.24	19	-7564.81	0.23786	0.15504	4.30513	2.85602	1	0.0910324
OG0005377	0.17788	18	-1819.47	19	-1818.56	0.16894	0.44718	3.46052	1.81136	1	0.178345
OG0005381	0.12471	18	-2457.49	19	-2457.46	0.12349	0.14046	5.00955	0.069796	1	0.791634
OG0005389	0.08028	18	-1930.49	19	-1930.2	0.08229	0.04631	4.2833	0.57296	1	0.449085
OG0005367	0.19163	18	-2172.67	19	-2170.42	0.20562	0.04869	4.86657	4.48721	1	0.0341494
OG0005378	0.12112	18	-2771.89	19	-2771.89	0.12081	0.12496	5.7359	0.005308	1	0.941921
OG0005320	0.03898	18	-6496.61	19	-6496.47	0.03843	0.04929	6.39814	0.261972	1	0.608769
OG0005289	0.01128	18	-3056.5	19	-3055.95	0.01224	0.0001	4.79996	1.10221	1	0.293782
OG0005396	0.06196	18	-1855.82	19	-1855.75	0.06328	0.04786	2.66683	0.133276	1	0.715059
OG0005393	0.15346	18	-2117.27	19	-2114.95	0.13846	0.40259	3.90977	4.65051	1	0.0310443
OG0005384	0.07955	18	-2629.43	19	-2629.28	0.07781	0.11784	3.25071	0.285662	1	0.593014
OG0005304	0.08115	18	-6102.52	19	-6102.42	0.07988	0.09271	7.29034	0.19865	1	0.655813
OG0005360	0.03414	18	-2287.01	19	-2287	0.03391	0.03724	2.66465	0.013768	1	0.906593
OG0005150	0.06991	18	-4860.72	19	-4860.72	0.06949	0.07412	2.85281	0.00543	1	0.941258
OG0005308	0.10139	18	-5453.78	19	-5453.15	0.0995	0.18936	4.99468	1.24464	1	0.264579
OG0005354	0.00992	18	-2830.79	19	-2830.53	0.01046	0.0001	3.81219	0.509392	1	0.475402
OG0005352	0.16963	18	-3083.08	19	-3082.29	0.16356	0.31602	3.21833	1.58867	1	0.207517
OG0005368	0.03497	18	-3323.68	19	-3322.04	0.03207	0.08689	4.00466	3.27295	1	0.0704309
OG0005114	0.22791	18	-8451.62	19	-8450.15	0.234	0.1338	5.53414	2.93255	1	0.0868104
OG0005365	0.17535	18	-4619.51	19	-4619.42	0.17713	0.15231	4.90713	0.168184	1	0.681731
OG0005364	0.1095	18	-4543.38	19	-4542.38	0.11334	0.06049	4.81112	2.0028	1	0.157009
OG0005390	0.04502	18	-4478	19	-4477.96	0.04453	0.051	5.86732	0.079824	1	0.777536
OG0005361	0.17905	18	-3601.62	19	-3600.57	0.18491	0.0932	2.61213	2.09376	1	0.147902
OG0005349	0.10516	18	-2950.16	19	-2949.97	0.10269	0.13658	3.98518	0.366074	1	0.545152
OG0005370	0.10516	18	-3639.86	19	-3639.51	0.10228	0.14871	3.78034	0.683224	1	0.408479
OG0005358	0.29716	18	-4645.6	19	-4645.48	0.29338	0.34984	5.32598	0.229192	1	0.632124
OG0005369	0.19218	18	-4288.05	19	-4285.76	0.20145	0.07597	2.71188	4.5836	1	0.0322793
OG0005293	0.08776	18	-7554.45	19	-7553.63	0.08443	0.12552	3.45952	1.64398	1	0.199781
OG0005387	0.02955	18	-2710.44	19	-2710.37	0.02906	0.03944	2.37001	0.144428	1	0.703918
OG0005343	0.16287	18	-9629.91	19	-9628.71	0.16739	0.11647	3.27137	2.38916	1	0.122179
OG0005344	0.14711	18	-5276.41	19	-5276.17	0.15016	0.11732	3.99176	0.482334	1	0.487367
OG0005353	0.02037	18	-6754.68	19	-6753.41	0.01938	0.0473	2.10674	2.53998	1	0.110996
OG0005363	0.10081	18	-6097.68	19	-6097.16	0.09846	0.13288	3.20025	1.03959	1	0.307918
OG0005346	0.11205	18	-4180.44	19	-4179.68	0.10877	0.27367	4.77894	1.52108	1	0.217456
OG0005398	0.06891	18	-2078.14	19	-2078.09	0.07005	0.0584	4.5579	0.105466	1	0.745366
OG0005427	0.0164	18	-823.597	19	-823.172	0.01794	0.0001	4.27149	0.851418	1	0.356152
OG0005385	0.04544	18	-4711.22	19	-4708.39	0.04825	0.0001	4.51532	5.66801	1	0.017277
OG0005380	0.06383	18	-5858.37	19	-5858.37	0.06372	0.06508	3.97659	0.003428	1	0.953311
OG0005351	0.03519	18	-3995.72	19	-3994.84	0.03628	0.0001	2.47673	1.75073	1	0.185785
OG0005413	0.09305	18	-1941.45	19	-1937.26	0.08021	0.32954	4.37867	8.36795	1	0.00381896
OG0005429	0.04508	18	-1240.68	19	-1240.5	0.04661	0.02538	1.77681	0.356148	1	0.550653
OG0005415	0.04148	18	-1890.06	19	-1888.85	0.04557	0.0001	2.85016	2.42711	1	0.119252
OG0005405	0.05893	18	-2379.69	19	-2379.21	0.06121	0.02912	5.08742	0.960842	1	0.326975
OG0005347	0.06459	18	-5615.37	19	-5614.81	0.06623	0.03827	2.97563	1.12492	1	0.288862
OG0005445	0.0868	18	-1653.49	19	-1653.42	0.08804	0.06549	3.38031	0.134708	1	0.7136
OG0005388	0.02395	18	-3691.39	19	-3691.36	0.02442	0.0199	2.88979	0.074948	1	0.784264
OG0005430	0.15355	18	-2046.46	19	-2043.18	0.1729	0.0001	4.67498	6.56288	1	0.0104128
OG0005409	0.3189	18	-3573.08	19	-3573.07	0.32031	0.30786	4.441	0.016952	1	0.896408
OG0005433	0.04042	18	-2311.88	19	-2311.02	0.04291	0.00827	5.02359	1.73707	1	0.187511
OG0005395	0.04593	18	-4088.92	19	-4087.73	0.0484	0.0001	4.1842	2.3679	1	0.123854
OG0005428	0.1203	18	-2304.23	19	-2304.12	0.11765	0.14631	5.46872	0.223208	1	0.636606
OG0005355	0.04862	18	-5417.28	19	-5416.9	0.04988	0.027	5.3808	0.774962	1	0.378686
OG0005438	0.00974	18	-3125.54	19	-3125.06	0.01019	0.0001	5.77447	0.960796	1	0.326986
OG0005350	0.09019	18	-5322.75	19	-5322.54	0.0918	0.06632	2.95887	0.42305	1	0.515419
OG0005382	0.10581	18	-6600.18	19	-6598.95	0.10186	0.16221	2.30326	2.45839	1	0.116899
OG0005402	0.12505	18	-3923.78	19	-3919.92	0.13399	0.02462	5.61599	7.7298	1	0.00543166
OG0005419	0.02012	18	-3896.6	19	-3895.34	0.02114	0.0001	4.76438	2.51345	1	0.112878
OG0005434	0.12987	18	-3308.6	19	-3307.75	0.13495	0.03015	3.98866	1.69573	1	0.192847
OG0005414	0.06766	18	-3789.89	19	-3789.77	0.06658	0.08886	5.60135	0.25493	1	0.613625
OG0005422	0.01995	18	-4351.44	19	-4350.07	0.02117	0.0001	2.73348	2.72494	1	0.098792
OG0005406	0.14833	18	-2651.46	19	-2651.45	0.149	0.13892	3.05091	0.01226	1	0.911835
OG0005443	0.24136	18	-4440.03	19	-4439.99	0.24344	0.22384	4.08779	0.0772	1	0.781128
OG0005432	0.02281	18	-4301.58	19	-4301.2	0.02149	0.03954	9.25192	0.759858	1	0.383373
OG0005412	0.17246	18	-5651.48	19	-5649.46	0.162	0.26393	4.09726	4.03782	1	0.0444914
OG0005436	0.20196	18	-3964.15	19	-3964.07	0.19903	0.24463	4.53134	0.173004	1	0.677456
OG0005401	0.22228	18	-5675.2	19	-5674.75	0.2163	0.28125	4.5136	0.90675	1	0.340978
OG0005482	0.09858	18	-982.947	19	-982.307	0.09066	0.24265	4.70599	1.27957	1	0.257978
OG0005462	0.07958	18	-1770.85	19	-1768.6	0.08469	0.0001	3.61845	4.50774	1	0.0337418
OG0005408	0.0776	18	-3550.1	19	-3547.85	0.06985	0.17448	1.81731	4.49204	1	0.034053
OG0005470	0.03968	18	-1673.16	19	-1672.53	0.04115	0.0001	4.70621	1.26046	1	0.261563
OG0005424	0.11595	18	-5915.25	19	-5914.33	0.11214	0.17008	3.98291	1.84961	1	0.173828
OG0005497	0.37186	18	-4065.11	19	-4063.98	0.35421	0.56461	3.48515	2.26954	1	0.131939
OG0005423	0.11291	18	-5016.42	19	-5016.25	0.11149	0.13996	3.74253	0.339662	1	0.560024
OG0005458	0.13679	18	-1522.79	19	-1520.27	0.12039	0.42722	3.11534	5.03449	1	0.0248475
OG0005484	0.11934	18	-2849.7	19	-2848.88	0.1145	0.2053	2.82299	1.62733	1	0.202072
OG0005505	0.07764	18	-3449.87	19	-3447.45	0.07121	0.15682	4.64321	4.84199	1	0.0277748
OG0005418	0.22731	18	-5974.17	19	-5974.16	0.22653	0.23417	4.23289	0.015942	1	0.899525
OG0005508	0.12165	18	-2834.01	19	-2832.62	0.11467	0.27019	2.58539	2.78704	1	0.0950296
OG0005450	0.2068	18	-3815.43	19	-3814.01	0.21759	0.1163	5.29087	2.84064	1	0.0919077
OG0005501	0.09045	18	-2915	19	-2915	0.09041	0.09072	4.06003	4.2e-05	1	0.994829
OG0005480	0.08785	18	-2033.25	19	-2033.02	0.08476	0.11724	4.64069	0.471098	1	0.492482
OG0005524	0.06014	18	-2142.22	19	-2141.76	0.0575	0.10042	2.9028	0.920664	1	0.337301
OG0005466	0.06417	18	-1953.57	19	-1953.24	0.06615	0.02941	5.20007	0.661384	1	0.416072
OG0005515	0.1834	18	-1915.09	19	-1913.17	0.16421	0.40131	1.73705	3.82494	1	0.0504952
OG0005475	0.07494	18	-2549.6	19	-2548.4	0.07947	0.02018	3.6	2.38577	1	0.122444
OG0005435	0.06016	18	-6883.05	19	-6880.82	0.05576	0.11659	3.9506	4.46807	1	0.034534
OG0005521	0.01184	18	-2080.11	19	-2079.39	0.01288	0.0001	8.72108	1.42989	1	0.231782
OG0005516	0.0337	18	-2621.14	19	-2621.14	0.0337	0.03366	5.15445	4e-06	1	0.998404
OG0005503	0.05089	18	-4416.4	19	-4415.59	0.04904	0.08921	3.12147	1.63206	1	0.201419
OG0005465	0.14282	18	-2258.46	19	-2258.14	0.138	0.21045	4.76869	0.642218	1	0.422909
OG0005499	0.03711	18	-3375.29	19	-3373.59	0.033	0.11047	2.88956	3.40398	1	0.0650392
OG0005468	0.09575	18	-2812.58	19	-2812.56	0.09642	0.08759	3.76284	0.02682	1	0.869914
OG0005487	0.21849	18	-4777.35	19	-4776.9	0.21261	0.27752	4.23961	0.888076	1	0.345999
OG0005479	0.1022	18	-3604.7	19	-3599	0.09186	0.38101	3.98242	11.4044	1	0.000732704
OG0005442	0.10099	18	-7543.34	19	-7543.09	0.09979	0.12684	2.03658	0.503174	1	0.478109
OG0005416	0.0946	18	-8125.17	19	-8124.03	0.0919	0.14047	2.53116	2.28223	1	0.130864
OG0005525	0.0836	18	-3296.82	19	-3296.71	0.08226	0.10051	2.04066	0.203604	1	0.651827
OG0005448	0.04358	18	-3147.57	19	-3147.48	0.04263	0.05728	5.8018	0.18333	1	0.668527
OG0005440	0.00923	18	-2556.22	19	-2555.39	0.01001	0.0001	4.62331	1.65978	1	0.197634
OG0005476	0.18122	18	-4803.46	19	-4803.42	0.18235	0.16563	2.88701	0.070974	1	0.789924
OG0005478	0.28692	18	-6644.32	19	-6644.25	0.28901	0.26429	2.95812	0.126222	1	0.722382
OG0005514	0.03223	18	-3773.38	19	-3771.61	0.03487	0.0001	6.11922	3.54183	1	0.0598396
OG0005513	0.04499	18	-3267.9	19	-3267.9	0.04496	0.04525	7.73508	0.000102	1	0.991942
OG0005474	0.24766	18	-5202.35	19	-5201.61	0.24098	0.37732	3.62698	1.48246	1	0.22339
OG0005488	0.16187	18	-3110.38	19	-3110.26	0.16458	0.13251	3.30697	0.252854	1	0.615073
OG0005452	0.09708	18	-3436.37	19	-3435.06	0.09093	0.18328	3.64718	2.62723	1	0.105045
OG0005485	0.02634	18	-3452.63	19	-3451.82	0.02761	0.0001	2.68916	1.60124	1	0.205728
OG0005509	0.0811	18	-3930.49	19	-3930.18	0.08331	0.04666	4.69518	0.617106	1	0.432125
OG0005483	0.09515	18	-5044.15	19	-5044.15	0.09515	0.09515	4.07337	0	1	1
OG0005457	0.35761	18	-8093.97	19	-8093.97	0.35726	0.36127	4.00517	0.002528	1	0.9599
OG0005498	0.05573	18	-2872.8	19	-2872.59	0.05406	0.07584	3.6702	0.42534	1	0.514284
OG0005529	0.0134	18	-4748.29	19	-4748.23	0.01364	0.00944	4.60137	0.136892	1	0.711391
OG0005464	0.0965	18	-5534.63	19	-5534.63	0.09642	0.09756	2.98451	0.00112	1	0.973303
OG0005449	0.25184	18	-7492.31	19	-7491.92	0.24724	0.31379	4.46645	0.781246	1	0.37676
OG0005528	0.16525	18	-6544.89	19	-6544.38	0.16918	0.12479	4.40075	1.02948	1	0.310281
OG0005491	0.03708	18	-3561.36	19	-3561.31	0.03645	0.04353	2.56832	0.093746	1	0.759468
OG0005518	0.07986	18	-5027.78	19	-5026.83	0.07671	0.1359	4.72031	1.89696	1	0.168419
OG0005495	0.13826	18	-8044.35	19	-8044.35	0.138	0.14386	2.66746	0.01453	1	0.904055
OG0005502	0.04598	18	-3845.33	19	-3845.28	0.04654	0.03605	2.28264	0.09813	1	0.754085
OG0005490	0.05693	18	-5298.86	19	-5298.73	0.05609	0.06882	2.97966	0.260346	1	0.609883
OG0005512	0.02272	18	-4698.05	19	-4697	0.02395	0.0001	2.69071	2.08704	1	0.148553
OG0005451	0.21185	18	-4589.36	19	-4587.45	0.19771	0.38601	5.36842	3.82752	1	0.0504175
OG0005541	0.18282	18	-2184.15	19	-2182.82	0.19495	0.08628	3.51258	2.6657	1	0.102533
OG0005460	0.01632	18	-5767.15	19	-5766.61	0.01557	0.02696	4.84535	1.06341	1	0.302438
OG0005578	0.14913	18	-996.266	19	-994.853	0.15631	0.0001	4.33464	2.82429	1	0.0928479
OG0005481	0.06007	18	-7253.57	19	-7253.27	0.0588	0.07476	3.94373	0.604576	1	0.436837
OG0005527	0.10845	18	-8264.83	19	-8252.1	0.11867	0.01704	4.01365	25.4541	1	4.53e-07
OG0005523	0.08553	18	-5249.04	19	-5248.63	0.0836	0.12756	3.25488	0.827058	1	0.363125
OG0005493	0.08121	18	-7676.89	19	-7676.73	0.08024	0.09899	2.92613	0.310856	1	0.577155
OG0005467	0.06371	18	-7556.76	19	-7556.44	0.06242	0.08671	4.08334	0.642068	1	0.422963
OG0005565	0.46295	18	-1981.63	19	-1981.35	0.44664	0.68235	2.11126	0.559324	1	0.454533
OG0005472	0.02404	18	-5436.12	19	-5434.92	0.02573	0.0001	2.29037	2.39608	1	0.12164
OG0005447	0.15553	18	-8712.5	19	-8712.35	0.15408	0.1893	4.23543	0.318498	1	0.572512
OG0005559	0.13101	18	-1791.5	19	-1790.94	0.13727	0.06056	5.67498	1.13093	1	0.287577
OG0005538	0.25324	18	-3861.88	19	-3858.85	0.27179	0.10721	4.73816	6.05179	1	0.0138922
OG0005571	0.00865	18	-1303.74	19	-1297.95	0.0001	0.205	2.94223	11.5707	1	0.000669999
OG0005461	0.11232	18	-9055.02	19	-9054.82	0.11091	0.13163	3.34383	0.389504	1	0.53256
OG0005542	0.03572	18	-3604.45	19	-3604.18	0.03699	0.02308	5.97511	0.531838	1	0.465835
OG0005492	0.14105	18	-6248.27	19	-6248.16	0.1426	0.12128	3.67061	0.229606	1	0.631816
OG0005530	0.23481	18	-4830.2	19	-4829.58	0.24137	0.16544	4.20828	1.24149	1	0.265183
OG0005557	0.06528	18	-2988.35	19	-2988.34	0.06489	0.07018	7.75232	0.020168	1	0.887069
OG0005553	0.09697	18	-3562.03	19	-3561.68	0.09383	0.13123	4.6713	0.691806	1	0.405551
OG0005533	0.0535	18	-4272.23	19	-4272.2	0.05307	0.05895	3.32104	0.061656	1	0.803897
OG0005580	0.05024	18	-1716.35	19	-1715.03	0.05331	0.0001	4.179	2.64271	1	0.104026
OG0005572	0.33869	18	-3856.18	19	-3853.07	0.3135	0.75118	2.88773	6.23054	1	0.0125565
OG0005536	0.02197	18	-4713.55	19	-4713.17	0.02266	0.01241	3.61681	0.760244	1	0.383252
OG0005587	0.0911	18	-1703.71	19	-1702.73	0.09669	0.03611	3.52057	1.9474	1	0.162868
OG0005561	0.01257	18	-2977.84	19	-2976.76	0.01046	0.04211	2.97037	2.16004	1	0.141641
OG0005560	0.08434	18	-4978.91	19	-4978.91	0.08441	0.08338	4.48414	0.000916	1	0.975855
OG0005556	0.05707	18	-3121.66	19	-3120.87	0.05976	0.01815	3.23086	1.56969	1	0.210251
OG0005537	0.05579	18	-5263.16	19	-5263.16	0.05586	0.05485	3.44211	0.002348	1	0.961353
OG0005583	0.0273	18	-2557.63	19	-2557.25	0.02422	0.07427	8.35612	0.742516	1	0.388856
OG0005576	0.0872	18	-4378.53	19	-4376.83	0.09151	0.02774	3.51208	3.39739	1	0.0652998
OG0005552	0.02463	18	-4348.66	19	-4348.59	0.02425	0.02939	4.85772	0.137562	1	0.710717
OG0005555	0.06037	18	-3220.32	19	-3220.31	0.06079	0.05265	2.54624	0.02063	1	0.885791
OG0005545	0.06911	18	-5849.68	19	-5849.46	0.06837	0.10229	2.58646	0.432464	1	0.510782
OG0005535	0.03914	18	-2930.52	19	-2930.42	0.04006	0.02573	1.8129	0.194608	1	0.659109
OG0005570	0.15198	18	-5336.85	19	-5336.84	0.15153	0.15988	6.21568	0.018454	1	0.891943
OG0005489	0.16042	18	-10880.9	19	-10879.6	0.15636	0.2317	2.98234	2.50347	1	0.113596
OG0005566	0.06663	18	-3884.54	19	-3883.99	0.0652	0.14477	2.49508	1.105	1	0.293171
OG0005567	0.04468	18	-5106.21	19	-5106.08	0.04538	0.03361	4.2711	0.268398	1	0.604408
OG0005548	0.17544	18	-2825.94	19	-2823.43	0.15795	0.83725	3.13797	5.02202	1	0.025027
OG0005573	0.06583	18	-5124.54	19	-5123.74	0.06762	0.02914	2.84766	1.59848	1	0.206119
OG0005554	0.03533	18	-3366.36	19	-3366.27	0.03443	0.04359	5.04604	0.19573	1	0.65819
OG0005591	0.0621	18	-1690.61	19	-1690.53	0.06098	0.08056	4.54373	0.152718	1	0.695951
OG0005575	0.02797	18	-4596.95	19	-4596.18	0.02951	0.0099	3.89844	1.54379	1	0.214054
OG0005558	0.12328	18	-4796.45	19	-4796.31	0.12143	0.14523	3.90191	0.280434	1	0.596417
OG0005582	0.10273	18	-4852.98	19	-4850.74	0.10995	0.0337	3.50654	4.48637	1	0.0341661
OG0005585	0.05348	18	-6093.88	19	-6092.94	0.05132	0.08514	4.47117	1.88844	1	0.169378
OG0005584	0.03653	18	-4910.97	19	-4910.39	0.03788	0.02039	3.84988	1.15856	1	0.281764
OG0005605	0.12556	18	-1831.97	19	-1831.89	0.12316	0.15492	4.66057	0.163266	1	0.686167
OG0005562	0.03505	18	-5843.16	19	-5843.15	0.03523	0.03292	2.34555	0.0226	1	0.880502
OG0005564	0.07222	18	-5728.07	19	-5726.98	0.07466	0.03267	3.11324	2.19877	1	0.138121
OG0005531	0.31387	18	-9291.1	19	-9291.03	0.31085	0.33652	3.59427	0.135998	1	0.712292
OG0005577	0.10699	18	-5888.43	19	-5888.08	0.10453	0.14615	1.70412	0.688074	1	0.40682
OG0005543	0.10958	18	-6807.95	19	-6807.55	0.11157	0.08011	3.62967	0.78789	1	0.374739
OG0005657	0.23777	18	-1877.85	19	-1877.43	0.24421	0.12821	2.62515	0.84394	1	0.358272
OG0005595	0.00777	18	-2301.78	19	-2301.54	0.00827	0.0001	4.46331	0.488552	1	0.484574
OG0005604	0.32773	18	-3406.12	19	-3402.47	0.2915	0.62387	3.03427	7.30259	1	0.00688553
OG0005649	0.0341	18	-1492.41	19	-1492.35	0.03473	0.02432	4.16926	0.11813	1	0.731072
OG0005596	0.05158	18	-2323.1	19	-2323.02	0.05265	0.04084	3.26576	0.14939	1	0.699119
OG0005603	0.0258	18	-2264.56	19	-2264.41	0.0268	0.0001	5.91673	0.31165	1	0.576669
OG0005549	0.0364	18	-6134.17	19	-6133.91	0.03539	0.04916	3.52342	0.535242	1	0.464411
OG0005639	0.07688	18	-1198.92	19	-1198.92	0.07688	1.05834	1.88862	-6.8e-05	1	invalid
OG0005650	0.11651	18	-2115.77	19	-2114.99	0.11147	0.27531	4.55942	1.54678	1	0.213612
OG0005579	0.17876	18	-3530.51	19	-3530.51	0.17852	0.1852	2.99008	0.002622	1	0.959162
OG0005597	0.30514	18	-2407.92	19	-2407.85	0.30055	0.37219	3.01076	0.148052	1	0.700404
OG0005638	0.20982	18	-2122.93	19	-2122.08	0.21401	0.0001	3.8569	1.70042	1	0.192233
OG0005612	0.12012	18	-3509.45	19	-3509.44	0.1195	0.13025	3.44276	0.025162	1	0.873964
OG0005627	0.00843	18	-2805.95	19	-2805.53	0.00885	0.0001	5.66043	0.839542	1	0.359528
OG0005551	0.05454	18	-5916.77	19	-5916.76	0.05431	0.05732	3.7905	0.019872	1	0.887895
OG0005622	0.0076	18	-2550.31	19	-2550.08	0.00792	0.0001	2.3615	0.470146	1	0.49292
OG0005631	0.0957	18	-5405.52	19	-5404.5	0.09958	0.05905	4.88704	2.0343	1	0.153785
OG0005599	0.12369	18	-6386.07	19	-6382.92	0.1289	0.03362	4.63376	6.30148	1	0.0120637
OG0005630	0.08689	18	-2835.59	19	-2831.49	0.07601	0.3735	2.71569	8.19634	1	0.00419751
OG0005590	0.09153	18	-4966.1	19	-4965.29	0.09571	0.05661	3.75829	1.61619	1	0.203624
OG0005643	0.04835	18	-2726.71	19	-2726.67	0.04875	0.03624	4.43307	0.079008	1	0.778646
OG0005634	0.14543	18	-3480.23	19	-3480.14	0.14397	0.17825	4.11179	0.172778	1	0.677655
OG0005614	0.04932	18	-3290.49	19	-3290.39	0.05027	0.03615	3.37208	0.20219	1	0.652959
OG0005594	0.09031	18	-6462.94	19	-6458.81	0.08307	0.1773	4.69045	8.26918	1	0.00403237
OG0005610	0.07535	18	-4985.39	19	-4983.57	0.07029	0.13075	5.29994	3.6459	1	0.0562075
OG0005617	0.09785	18	-5582.43	19	-5581.82	0.09491	0.13649	5.93588	1.22082	1	0.269199
OG0005632	0.27941	18	-5315.99	19	-5313.8	0.26529	0.50226	2.25375	4.39124	1	0.036124
OG0005589	0.06333	18	-6051.73	19	-6050.69	0.06533	0.03368	4.10343	2.07339	1	0.149888
OG0005611	0.02109	18	-4155.32	19	-4153.42	0.02301	0.0001	5.2156	3.78994	1	0.0515615
OG0005637	0.04992	18	-3644.99	19	-3644.28	0.04726	0.08824	3.46227	1.41627	1	0.234019
OG0005636	0.05876	18	-3609.08	19	-3609.07	0.05901	0.05638	5.47884	0.00897	1	0.924545
OG0005642	0.20066	18	-6757.13	19	-6756.09	0.19519	0.29881	3.03906	2.06854	1	0.150365
OG0005593	0.08125	18	-4258.51	19	-4256.15	0.0761	0.20328	3.6192	4.72295	1	0.0297626
OG0005609	0.09197	18	-3090.91	19	-3090.9	0.09242	0.08459	4.81323	0.023584	1	0.877948
OG0005615	0.4037	18	-3100.61	19	-3099.84	0.39057	0.79434	3.44549	1.54522	1	0.213842
OG0005623	0.07788	18	-4153.79	19	-4152.86	0.08111	0.02439	3.68577	1.8649	1	0.172061
OG0005608	0.04302	18	-3959.48	19	-3959.2	0.04182	0.0669	5.78433	0.549008	1	0.458723
OG0005629	0.03056	18	-3135.21	19	-3134.82	0.03213	0.01415	3.64844	0.77484	1	0.378724
OG0005624	0.07087	18	-4805.63	19	-4805.56	0.07177	0.05575	4.14857	0.140704	1	0.707582
OG0005640	0.05832	18	-6397.65	19	-6396.03	0.06128	0.0301	5.84573	3.22637	1	0.0724611
OG0005616	0.0595	18	-4117.35	19	-4115.78	0.05412	0.11082	4.92309	3.14095	1	0.0763493
OG0005600	0.07136	18	-5731.8	19	-5730.66	0.07405	0.0001	2.19166	2.28594	1	0.130551
OG0005655	0.02107	18	-4020.23	19	-4018.31	0.02319	0.0001	2.78926	3.85139	1	0.0497049
OG0005613	0.09872	18	-6582.07	19	-6580.92	0.09438	0.14485	5.72693	2.30439	1	0.129009
OG0005654	0.0192	18	-5887.62	19	-5886.69	0.01996	0.0001	2.63998	1.84972	1	0.173816
OG0005607	0.22309	18	-8491.81	19	-8491.22	0.21849	0.28482	2.82226	1.18317	1	0.276711
OG0005641	0.22698	18	-8925.89	19	-8925.82	0.22908	0.21138	4.43085	0.141678	1	0.706619
OG0005621	0.04273	18	-5767.58	19	-5766	0.04496	0.01707	3.30968	3.16236	1	0.0753541
OG0005645	0.02276	18	-4952.62	19	-4951.3	0.02444	0.00625	6.64242	2.64028	1	0.104185
OG0005644	0.03717	18	-5974.9	19	-5974.14	0.03556	0.06368	6.19978	1.51572	1	0.218268
OG0005626	0.06189	18	-5089.73	19	-5089.02	0.05963	0.10261	2.74976	1.42412	1	0.232727
OG0005619	0.18457	18	-6188.08	19	-6187.86	0.18187	0.2289	2.68393	0.444194	1	0.505105
OG0005635	0.07385	18	-7034.18	19	-7033.6	0.07138	0.1159	2.06104	1.16829	1	0.279753
OG0005598	0.10755	18	-8240.01	19	-8231.2	0.09959	0.46038	4.01257	17.619	1	2.6988e-05

## Sheet: ST4
ST4: Branch model with Brachygastra foreground
orthogroup	w_M0	np_M0	lnL_M0	np_M2	lnL_M2	background_w	foreground_w	kappa_M2	D	DF	chiTest
OG0002765	0.03944	18	-853.203	19	-853.203	0.03944	1.04721	3.099	-4e-06	1	invalid
OG0002795	0.06507	18	-996.867	19	-996.036	0.06845	0.0001	4.43558	1.66198	1	0.197336
OG0002768	0.09088	18	-2100.05	19	-2100.05	0.09088	0.0001	4.92235	6.8e-05	1	0.993421
OG0002783	0.03785	18	-1957.22	19	-1957.22	0.03785	0.0001	6.95329	2e-05	1	0.996432
OG0002784	0.16557	18	-3058.47	19	-3057.56	0.16422	516.735	6.07631	1.83215	1	0.175874
OG0002776	0.28987	18	-3357.12	19	-3347.28	0.31857	0.01439	2.12785	19.6663	1	9.221e-06
OG0002787	0.11787	18	-2683.4	19	-2683.4	0.11787	0.0001	3.87653	7.6e-05	1	0.993044
OG0002777	0.08202	18	-5157.02	19	-5157.02	0.08201	1.04743	3.62165	2e-06	1	0.998872
OG0002791	0.21691	18	-4750.97	19	-4750.95	0.21672	0.27052	3.91163	0.024384	1	0.875912
OG0002796	0.06235	18	-4685.42	19	-4685.3	0.06181	0.09593	6.14204	0.231966	1	0.63007
OG0002782	0.03681	18	-4909.93	19	-4909.93	0.03681	0.0001	5.85654	2.4e-05	1	0.996091
OG0002775	0.03634	18	-5502.95	19	-5502.57	0.03567	0.06556	4.4062	0.745492	1	0.387907
OG0002785	0.19435	18	-3874.36	19	-3873.69	0.19552	0.0001	5.37353	1.33779	1	0.247424
OG0002762	0.02417	18	-3721.87	19	-3721.87	0.02417	0.0001	3.17447	0.000128	1	0.990973
OG0002800	0.07673	18	-3271.32	19	-3269.77	0.07977	0.01749	2.5291	3.10834	1	0.0778922
OG0002788	0.05119	18	-4234.65	19	-4234.59	0.05097	0.07959	6.04116	0.13491	1	0.713395
OG0002767	0.01778	18	-4543.14	19	-4543.14	0.01778	0.83724	3.21106	-0.000126	1	invalid
OG0002779	0.24002	18	-4390.07	19	-4388.81	0.24171	0.0001	3.23726	2.51006	1	0.113122
OG0002797	0.04362	18	-4185.35	19	-4175.67	0.03779	0.44503	5.18504	19.3598	1	1.0826e-05
OG0002786	0.03557	18	-3967.51	19	-3967.51	0.03557	1.03833	5.69902	-0.00042	1	invalid
OG0002758	0.17364	18	-6533.58	19	-6530.69	0.16564	0.39969	4.41903	5.78214	1	0.0161898
OG0002807	0.181	18	-1375.7	19	-1375.7	0.18099	111.566	2.50491	0.000412	1	0.983806
OG0002808	0.43556	18	-1770.35	19	-1770.35	0.43556	1.04722	2.23976	0	1	1
OG0002780	0.06618	18	-5217.14	19	-5215.7	0.06361	0.1493	5.53789	2.88843	1	0.0892177
OG0002834	0.37294	18	-2694.5	19	-2694.5	0.37294	1.04714	3.14675	-8e-06	1	invalid
OG0002759	0.03381	18	-3839.19	19	-3838.58	0.0327	0.14488	3.80772	1.22262	1	0.268846
OG0002761	0.12377	18	-6258.39	19	-6258.2	0.12179	0.14824	2.34046	0.381104	1	0.537013
OG0002819	0.2508	18	-2494.61	19	-2494.61	0.2508	1.04031	2.09849	8e-06	1	0.997743
OG0002804	0.00887	18	-1458.43	19	-1458.43	0.00887	0.0001	5.5532	4e-06	1	0.998404
OG0002831	0.07632	18	-2399.34	19	-2399.34	0.07632	0.0001	4.98215	6.2e-05	1	0.993718
OG0002760	0.02646	18	-5181.02	19	-5180.45	0.02678	0.0001	4.28922	1.14746	1	0.284081
OG0002824	0.34816	18	-2463.39	19	-2463.39	0.34816	1.09558	3.71336	1.4e-05	1	0.997015
OG0002835	0.14801	18	-2524.25	19	-2523.95	0.14496	0.22989	3.42598	0.588542	1	0.442983
OG0002832	0.01567	18	-1575.63	19	-1575.51	0.01594	0.0001	4.36664	0.24384	1	0.621446
OG0002770	0.09726	18	-6167.79	19	-6167.61	0.0979	0.01229	4.01264	0.354414	1	0.551625
OG0002806	0.03976	18	-2267.33	19	-2267.15	0.0392	0.08539	4.25549	0.357846	1	0.549705
OG0002828	0.0896	18	-2821.74	19	-2821.58	0.09047	0.0001	4.89669	0.308798	1	0.578419
OG0002810	0.34733	18	-3371.8	19	-3370.25	0.35486	0.06095	4.33429	3.10277	1	0.0781594
OG0002811	0.09815	18	-3435.38	19	-3435.38	0.09815	0.0001	5.13319	0.000126	1	0.991044
OG0002813	0.03104	18	-4175.64	19	-4175.37	0.03127	0.0001	5.21409	0.540256	1	0.462327
OG0002815	0.09386	18	-4137.01	19	-4135.85	0.09816	0.04157	2.4986	2.32093	1	0.127644
OG0002827	0.1309	18	-2534.28	19	-2533.86	0.12831	0.49676	4.95737	0.84438	1	0.358147
OG0002853	0.13	18	-803.446	19	-803.446	0.13	1.04692	1.54988	-0.000248	1	invalid
OG0002805	0.1653	18	-3386.74	19	-3386.71	0.16431	0.18523	4.1565	0.054042	1	0.816173
OG0002812	0.19847	18	-5065.62	19	-5065.13	0.20396	0.14875	4.49647	0.989882	1	0.319771
OG0002798	0.06242	18	-5614.72	19	-5613.97	0.0597	0.09682	2.64405	1.5005	1	0.220595
OG0002809	0.19556	18	-5686.19	19	-5686.19	0.19556	1.07977	3.76613	-0.00016	1	invalid
OG0002823	0.11698	18	-3349.86	19	-3349.84	0.11636	0.13073	2.91353	0.043426	1	0.834925
OG0002818	0.085	18	-4321.11	19	-4321.11	0.085	1.12632	5.70692	-0.00011	1	invalid
OG0002845	0.0209	18	-1997.69	19	-1997.69	0.0209	1.0479	5.92156	-5.2e-05	1	invalid
OG0002802	0.2821	18	-5571.53	19	-5570.34	0.28642	0.08364	5.1308	2.37214	1	0.123517
OG0002888	0.0089	18	-1410.73	19	-1410.73	0.0089	0.9695	2.3432	-8e-05	1	invalid
OG0002868	0.16629	18	-2191.2	19	-2189.92	0.17525	0.05443	6.15271	2.55492	1	0.109952
OG0002855	0.31461	18	-3118.93	19	-3118.93	0.31461	1.04716	2.49064	-1.4e-05	1	invalid
OG0002842	0.12313	18	-2246.22	19	-2245.82	0.12375	0.0001	2.71863	0.79728	1	0.371908
OG0002837	0.06585	18	-5136.38	19	-5136.05	0.06618	0.0001	5.03393	0.661124	1	0.416163
OG0002852	0.29487	18	-3235.61	19	-3235.61	0.29487	1.04728	4.39715	0	1	1
OG0002859	0.21793	18	-1568.94	19	-1568.94	0.21793	0.0001	2.89151	3e-05	1	0.99563
OG0002865	0.19472	18	-2284.56	19	-2284.56	0.19472	1.11616	3.6938	-4.2e-05	1	invalid
OG0002814	0.07877	18	-5597.77	19	-5597.76	0.07856	0.08437	6.16711	0.020964	1	0.884877
OG0002874	0.07871	18	-1765.61	19	-1765.61	0.07871	1.04376	4.80229	-6.4e-05	1	invalid
OG0002789	0.34	18	-8505.8	19	-8505.8	0.34	1.04688	3.25464	-2e-05	1	invalid
OG0002896	0.02112	18	-1293.87	19	-1293.56	0.0219	0.0001	2.28299	0.614706	1	0.433021
OG0002877	0.16501	18	-2433.73	19	-2429.79	0.17649	0.0001	3.40296	7.89167	1	0.0049663
OG0002890	0.06416	18	-1871.93	19	-1871.93	0.06411	0.06551	3.83479	0.00036	1	0.984862
OG0002793	0.04037	18	-6418.68	19	-6418.68	0.04037	0.0001	4.60206	0.000544	1	0.981392
OG0002882	0.17353	18	-2871.81	19	-2871.81	0.17353	0.0001	3.49609	8.8e-05	1	0.992515
OG0002897	0.01943	18	-1785.27	19	-1785.04	0.01972	0.0001	6.12018	0.462908	1	0.496268
OG0002887	0.29569	18	-5191.59	19	-5191.59	0.29569	0.0001	3.58244	0.000152	1	0.990163
OG0002821	0.12603	18	-3841.91	19	-3841.91	0.12603	0.0001	4.8564	0.00021	1	0.988438
OG0002902	0.07312	18	-2493.51	19	-2493.51	0.07312	0.9665	4.15202	-0.000116	1	invalid
OG0002891	0.27275	18	-4774.41	19	-4774.41	0.27275	1.05258	3.22225	-2.2e-05	1	invalid
OG0002900	0.29077	18	-4467.48	19	-4466.92	0.28975	999	3.08061	1.13359	1	0.287012
OG0002854	0.06955	18	-2720.7	19	-2720.7	0.06959	0.06911	2.98062	0.00011	1	0.991632
OG0002833	0.08145	18	-6355.47	19	-6354.48	0.08222	0.0001	4.32764	1.98349	1	0.159023
OG0002875	0.05819	18	-3697.44	19	-3696.07	0.06131	0.02081	5.28984	2.73614	1	0.0981015
OG0002830	0.34302	18	-10013.5	19	-10013.5	0.34323	0.24644	1.96521	0.054486	1	0.815433
OG0002846	0.1719	18	-4430.66	19	-4430.57	0.17241	0.10424	3.58106	0.165218	1	0.684397
OG0002903	0.02202	18	-2859.7	19	-2859.7	0.02202	1.05359	3.32441	4.2e-05	1	0.994829
OG0002840	0.26381	18	-9637.51	19	-9637.51	0.26381	1.97606	3.32319	-0.001702	1	invalid
OG0002847	0.22659	18	-5071.94	19	-5071.94	0.22659	0.0001	3.13977	0.00012	1	0.99126
OG0002885	0.08927	18	-6884.64	19	-6884.61	0.08953	0.07793	6.70238	0.04345	1	0.83488
OG0002869	0.28578	18	-6682.91	19	-6682.38	0.28312	0.60784	4.30921	1.06269	1	0.302602
OG0002872	0.0537	18	-2755.73	19	-2755.73	0.05369	1.04801	4.0746	0.000104	1	0.991863
OG0002863	0.05036	18	-3920.4	19	-3918.18	0.05241	0.0001	4.03355	4.43653	1	0.0351776
OG0002838	0.16359	18	-9518.98	19	-9518.96	0.1632	0.17464	2.7931	0.043364	1	0.835041
OG0002849	0.1118	18	-5091.5	19	-5090.73	0.11272	0.0001	5.91141	1.55495	1	0.212407
OG0002817	0.13979	18	-7495.52	19	-7487.75	0.12944	0.56935	4.08543	15.5441	1	8.0601e-05
OG0002860	0.0334	18	-3126.64	19	-3126.64	0.0334	0.0001	4.19402	2e-05	1	0.996432
OG0002880	0.18489	18	-3462.33	19	-3461.84	0.1896	0.00643	2.95729	0.984938	1	0.320983
OG0002844	0.06354	18	-3278.05	19	-3278.05	0.06354	34.8455	4.32291	0.002272	1	0.961983
OG0002904	0.2036	18	-2824.37	19	-2824.37	0.2036	1.04714	2.99153	-1.8e-05	1	invalid
OG0002923	0.04914	18	-2839.08	19	-2839.08	0.04914	1.06628	6.82444	-3.8e-05	1	invalid
OG0002894	0.26106	18	-6566.43	19	-6565.85	0.25864	0.54603	5.97461	1.15956	1	0.281558
OG0002905	0.28451	18	-4359.86	19	-4359.05	0.28588	0.0001	2.7607	1.6054	1	0.205139
OG0002850	0.06746	18	-6515.89	19	-6514.3	0.07125	0.03028	5.41135	3.18347	1	0.0743865
OG0002843	0.02858	18	-4794.85	19	-4793.42	0.03064	0.0001	6.03153	2.87725	1	0.0898393
OG0002878	0.06707	18	-5819.45	19	-5818.96	0.06659	0.29201	6.06499	0.972998	1	0.323934
OG0002914	0.02268	18	-3240.2	19	-3240.15	0.02272	0.0001	5.17534	0.102526	1	0.748819
OG0002907	0.07585	18	-3285.58	19	-3285.32	0.07615	0.0001	3.34893	0.517766	1	0.471796
OG0002895	0.18947	18	-6972.61	19	-6971.73	0.19123	0.05384	3.36279	1.75941	1	0.184698
OG0002906	0.09193	18	-5566.18	19	-5565.66	0.09227	0.0001	5.09765	1.02811	1	0.310604
OG0002927	0.02651	18	-3130.57	19	-3129.36	0.02796	0.0001	3.2699	2.42571	1	0.119359
OG0002912	0.00918	18	-1941.63	19	-1941.63	0.00918	0.0001	3.69393	4e-06	1	0.998404
OG0002901	0.08074	18	-5850.5	19	-5850.19	0.07988	0.1462	4.91739	0.629764	1	0.427442
OG0002913	0.01538	18	-3311.78	19	-3311.72	0.01542	0.0001	5.07649	0.113086	1	0.736658
OG0002921	0.21179	18	-4374.4	19	-4373.6	0.20894	1.08131	5.01298	1.60183	1	0.205644
OG0002925	0.132	18	-4684.58	19	-4683.82	0.13279	0.0001	4.75472	1.51431	1	0.218483
OG0002910	0.01138	18	-3639.16	19	-3638.43	0.01256	0.0001	2.76434	1.4673	1	0.225773
OG0002922	0.13188	18	-4584.59	19	-4584.58	0.13157	0.15732	3.36553	0.029476	1	0.863685
OG0002917	0.0159	18	-3324.75	19	-3324.31	0.01664	0.0001	6.23812	0.87884	1	0.34852
OG0002911	0.11554	18	-4338.66	19	-4338.38	0.11889	0.08738	3.42681	0.552472	1	0.457309
OG0002957	0.27345	18	-1257.73	19	-1246.69	0.17775	1.71139	3.54732	22.0832	1	2.611e-06
OG0002940	0.05292	18	-1591.64	19	-1591.47	0.0533	0.0001	2.62607	0.333502	1	0.563604
OG0002920	0.17118	18	-6820.67	19	-6820.05	0.17176	0.0001	4.18199	1.24874	1	0.263794
OG0002879	0.07954	18	-6109.21	19	-6107.75	0.08122	0.0001	6.49238	2.90632	1	0.0882332
OG0002915	0.15611	18	-7164.67	19	-7164.19	0.1565	0.0001	3.71588	0.961386	1	0.326838
OG0002996	0.15787	18	-2794.08	19	-2794.08	0.15787	1.04732	3.69699	-2e-05	1	invalid
OG0002942	0.26678	18	-3058.06	19	-3058.06	0.26678	0.0001	3.20812	6.4e-05	1	0.993617
OG0002909	0.20838	18	-5794.39	19	-5794.39	0.20837	391.93	5.1934	0.002754	1	0.958147
OG0002994	0.14942	18	-2787.77	19	-2787.77	0.14942	1.05752	4.38321	-7e-05	1	invalid
OG0002973	0.33718	18	-2222.05	19	-2222.05	0.33718	1.04583	2.87294	-4.2e-05	1	invalid
OG0002995	0.3546	18	-3137.55	19	-3137.55	0.3546	1.04758	2.36644	-1.8e-05	1	invalid
OG0002992	0.21997	18	-1856.87	19	-1856.87	0.21997	0.0001	4.98986	4.6e-05	1	0.994589
OG0003003	0.03152	18	-1731.02	19	-1730.91	0.03171	0.0001	3.77509	0.217378	1	0.641045
OG0002933	0.28441	18	-3485.22	19	-3485.22	0.28444	0.27952	4.25793	0.000152	1	0.990163
OG0002999	0.01473	18	-2703.51	19	-2703.4	0.01483	0.0001	3.34546	0.214598	1	0.643187
OG0002941	0.03458	18	-2096.11	19	-2096.11	0.03458	0.95919	2.56275	-8e-05	1	invalid
OG0002984	0.16034	18	-2300.46	19	-2300.46	0.16034	1.04729	3.56884	-3.2e-05	1	invalid
OG0002986	0.03022	18	-1829.87	19	-1829.87	0.03022	1.04497	5.16793	-0.000178	1	invalid
OG0003000	0.00581	18	-2294.47	19	-2294.43	0.00584	0.0001	7.27154	0.073616	1	0.786143
OG0002959	0.01697	18	-3331	19	-3331	0.01697	1.04363	7.27351	-0.000124	1	invalid
OG0002943	0.09869	18	-3006.13	19	-3006.13	0.09868	1.14865	2.42464	0.000506	1	0.982054
OG0002997	0.0567	18	-4757.5	19	-4756.06	0.05776	0.0001	6.62567	2.88209	1	0.0895697
OG0002966	0.12211	18	-4564.79	19	-4564.75	0.12243	0.0888	5.7899	0.080504	1	0.776616
OG0002964	0.03328	18	-4042.22	19	-4042.11	0.03338	0.0001	5.97643	0.219522	1	0.639404
OG0002990	0.07028	18	-4137.19	19	-4136.78	0.07071	0.0001	5.74799	0.832344	1	0.361596
OG0002962	0.16722	18	-3751.88	19	-3751.22	0.16365	0.34387	2.11576	1.30732	1	0.252881
OG0002937	0.1198	18	-4217.62	19	-4217.61	0.1194	0.12691	2.1191	0.01929	1	0.889538
OG0002929	0.03393	18	-4538.14	19	-4538.04	0.03401	0.0001	2.00178	0.19911	1	0.65544
OG0003025	0.19434	18	-1199.05	19	-1199.05	0.19434	1.04206	3.5178	1e-05	1	0.997477
OG0002916	0.02649	18	-6706.32	19	-6706.2	0.02654	0.0001	3.15191	0.232582	1	0.629616
OG0002928	0.19007	18	-8443.18	19	-8443.1	0.18978	0.34423	2.87661	0.174196	1	0.676409
OG0002981	0.16478	18	-4634.75	19	-4633.88	0.16399	999	4.88071	1.73427	1	0.187867
OG0003065	0.19393	18	-1004.21	19	-1004.21	0.19393	1.00074	4.44996	-1.4e-05	1	invalid
OG0002918	0.07556	18	-7162.2	19	-7162.16	0.07616	0.06643	2.65268	0.09197	1	0.761687
OG0002938	0.07509	18	-3889.56	19	-3889.34	0.07636	0.0001	3.79633	0.450178	1	0.50225
OG0003090	0.17861	18	-960.424	19	-960.318	0.18221	0.10793	2.91222	0.211976	1	0.645223
OG0002948	0.05125	18	-4636.77	19	-4636.43	0.05032	0.10153	4.66093	0.683998	1	0.408213
OG0002949	0.04507	18	-3405.99	19	-3405.86	0.04594	0.0001	2.12042	0.259562	1	0.610421
OG0003058	0.06799	18	-1706.64	19	-1706.64	0.06799	0.0001	4.30887	4e-06	1	0.998404
OG0002976	0.06168	18	-3282.2	19	-3281.24	0.06314	0.0001	4.21775	1.93055	1	0.164699
OG0003008	0.15886	18	-2722.01	19	-2722.01	0.15886	0.0001	4.2852	0.000146	1	0.990359
OG0002978	0.13088	18	-5202.14	19	-5201.32	0.13026	999	5.79493	1.65256	1	0.198611
OG0003001	0.03724	18	-4709.09	19	-4709.09	0.03724	1.04481	2.57943	-0.000162	1	invalid
OG0003018	0.06159	18	-3911.61	19	-3911.61	0.06159	1.04714	5.6661	-9.2e-05	1	invalid
OG0002991	0.12082	18	-4524.41	19	-4524.01	0.12137	0.0001	4.64493	0.81248	1	0.367388
OG0003039	0.03184	18	-2967.05	19	-2966.95	0.03203	0.0001	6.0006	0.213232	1	0.644246
OG0003016	0.05757	18	-3586.47	19	-3585.65	0.05648	0.35707	6.56812	1.64842	1	0.199174
OG0003022	0.05295	18	-1615.63	19	-1615.63	0.05295	0.0001	3.11903	2.2e-05	1	0.996258
OG0003019	0.33278	18	-2920.55	19	-2917.53	0.35642	0.10556	3.40197	6.02921	1	0.0140711
OG0002985	0.0754	18	-6323.98	19	-6323.54	0.07565	0.0001	3.97821	0.878222	1	0.348689
OG0003089	0.08636	18	-1710.84	19	-1710.84	0.08636	0.0001	4.7198	2.8e-05	1	0.995778
OG0002987	0.22495	18	-7039.39	19	-7038.7	0.22554	0.0001	4.63381	1.3751	1	0.240938
OG0002971	0.04406	18	-5047.36	19	-5046.37	0.04616	0.01745	3.48481	1.99983	1	0.157317
OG0003036	0.08626	18	-2954.97	19	-2954.74	0.08658	0.0001	6.37922	0.471288	1	0.492395
OG0003071	0.0971	18	-3205.1	19	-3205.1	0.0971	1.04713	4.49611	-6.2e-05	1	invalid
OG0003075	0.13198	18	-1606.32	19	-1605.63	0.13501	0.0001	2.07811	1.3857	1	0.239133
OG0002947	0.11988	18	-5672.79	19	-5672.51	0.11867	0.22175	4.58096	0.55621	1	0.455791
OG0003068	0.13804	18	-2907.73	19	-2907.64	0.13749	0.26566	3.77109	0.179828	1	0.671521
OG0003030	0.10662	18	-3305.29	19	-3304.25	0.10804	0.0001	5.60459	2.09658	1	0.147629
OG0002951	0.15728	18	-7631.22	19	-7631.19	0.15717	0.2119	3.78858	0.044334	1	0.833233
OG0003049	0.49257	18	-3982.46	19	-3982.2	0.50184	0.36958	3.44514	0.525936	1	0.46832
OG0003084	0.25485	18	-3132.52	19	-3132.52	0.25485	1.0473	3.16759	6e-06	1	0.998046
OG0002980	0.0786	18	-4457.03	19	-4456.95	0.07967	0.05842	3.57523	0.166956	1	0.682831
OG0003046	0.13826	18	-3676.06	19	-3675.94	0.13773	0.28058	2.72747	0.246148	1	0.619801
OG0003011	0.12588	18	-4148.95	19	-4148.95	0.12588	0.0001	6.23437	4.6e-05	1	0.994589
OG0003069	0.13987	18	-3221.1	19	-3221.1	0.13987	1.0467	4.92209	-0.000106	1	invalid
OG0003035	0.08877	18	-2846.67	19	-2846.38	0.08931	0.0001	5.51451	0.578706	1	0.44682
OG0002931	0.28029	18	-9941.47	19	-9940.82	0.28076	0.0001	3.00465	1.29268	1	0.255554
OG0003006	0.23619	18	-7894.91	19	-7894.91	0.23619	0.95602	3.63182	-1.4e-05	1	invalid
OG0002956	0.17239	18	-4800.6	19	-4800.11	0.17645	0.11054	4.5658	0.97805	1	0.322681
OG0002993	0.07947	18	-6784.14	19	-6783.58	0.07977	0.0001	5.10065	1.10912	1	0.292274
OG0003048	0.06563	18	-2776.99	19	-2776.99	0.06563	1.04722	4.89727	-2.6e-05	1	invalid
OG0003072	0.03005	18	-4115.62	19	-4115.62	0.03005	1.04747		0.000128	1	0.990973
OG0002963	0.01457	18	-4794.63	19	-4794.11	0.01498	0.0001	4.15834	1.05062	1	0.305363
OG0003087	0.05342	18	-2122.13	19	-2122.13	0.05342	1.04752	9.75537	0	1	1
OG0003014	0.12981	18	-6995.98	19	-6995.97	0.12941	0.13535	3.67963	0.022758	1	0.880088
OG0003041	0.06234	18	-2890.31	19	-2889.68	0.06387	0.0001	2.29904	1.25252	1	0.263071
OG0003047	0.12531	18	-4438.94	19	-4438.06	0.11941	0.17864	5.08636	1.7452	1	0.186481
OG0002988	0.16254	18	-5244.56	19	-5243.18	0.16668	0.05252	2.31543	2.75724	1	0.0968149
OG0003040	0.22796	18	-4964.4	19	-4963.92	0.22865	0.0001	3.99829	0.961622	1	0.326779
OG0003050	0.19507	18	-4130.99	19	-4130.99	0.19507	1.08468	3.24071	-4.4e-05	1	invalid
OG0003073	0.03456	18	-5542.84	19	-5542.72	0.03463	0.0001	6.09011	0.23995	1	0.624242
OG0003064	0.09463	18	-3633.45	19	-3633.29	0.0964	0.07366	2.54628	0.318588	1	0.572457
OG0003148	0.14213	18	-1124.62	19	-1123.51	0.15287	0.0001	4.76815	2.22132	1	0.136116
OG0003054	0.09475	18	-5863.49	19	-5863.35	0.0943	0.15693	4.83347	0.290816	1	0.589698
OG0003056	0.08463	18	-4156.71	19	-4156.71	0.08463	1.04705	4.92321	-3.8e-05	1	invalid
OG0003082	0.17325	18	-4124.66	19	-4123.78	0.17145	999	5.81521	1.75051	1	0.185812
OG0003162	0.01259	18	-1203.43	19	-1203.38	0.01272	0.0001	2.31504	0.10125	1	0.750335
OG0003026	0.113	18	-4906.61	19	-4906.59	0.11264	0.12687	4.50498	0.03509	1	0.851407
OG0003004	0.06733	18	-3622.29	19	-3622.04	0.06753	0.0001	2.89853	0.500506	1	0.479278
OG0003024	0.03532	18	-4202.42	19	-4202	0.03593	0.0001	3.88165	0.854204	1	0.355366
OG0003136	0.22764	18	-2507.29	19	-2507.29	0.22764	1.04747	4.26394	3.6e-05	1	0.995213
OG0003012	0.14342	18	-5739.17	19	-5737.58	0.1513	0.0448	3.20227	3.17678	1	0.0746918
OG0003031	0.02087	18	-5351.36	19	-5350.83	0.02117	0.0001	2.75221	1.0665	1	0.301738
OG0003010	0.01873	18	-4461.33	19	-4460.24	0.01811	0.15977	2.38225	2.1797	1	0.139842
OG0003081	0.03902	18	-5370.6	19	-5370.6	0.03902	1.08953	4.32123	0.000818	1	0.977183
OG0003135	0.02961	18	-1785.87	19	-1785.87	0.02961	1.04741	6.80409	2e-05	1	0.996432
OG0003017	0.08407	18	-7718.87	19	-7718.34	0.08431	0.0001	3.76051	1.0717	1	0.300562
OG0003061	0.12193	18	-7017.97	19	-7017.64	0.12213	0.0001	2.66166	0.658528	1	0.41708
OG0003051	0.07714	18	-2986.16	19	-2986.16	0.07714	0.0001	6.67791	0.00034	1	0.985289
OG0003057	0.02916	18	-3518.8	19	-3518.77	0.02931	0.0001	6.71037	0.059906	1	0.806645
OG0003093	0.04045	18	-4047.37	19	-4047.23	0.04058	0.0001	3.11109	0.278816	1	0.597478
OG0003078	0.02924	18	-6443.5	19	-6441.75	0.03018	0.0001	4.51073	3.48332	1	0.0619903
OG0003159	0.08802	18	-1557.86	19	-1557.86	0.08802	0.62293	2.03782	-5e-05	1	invalid
OG0003020	0.14061	18	-5781.22	19	-5781.22	0.14061	0.0001	3.7557	8.4e-05	1	0.992687
OG0003114	0.21073	18	-3975.17	19	-3975.17	0.21073	1.04949	3.07314	1.2e-05	1	0.997236
OG0003070	0.07775	18	-5946.71	19	-5946.71	0.07775	0.94838	3.81596	-6.4e-05	1	invalid
OG0002998	0.08418	18	-6258.14	19	-6257.93	0.08352	0.14756	3.33476	0.416004	1	0.518938
OG0003167	0.07341	18	-2697.02	19	-2696.75	0.07372	0.0001	3.9504	0.542126	1	0.461553
OG0003055	0.11491	18	-5923.71	19	-5922.75	0.11737	0.04372	4.34383	1.91143	1	0.166805
OG0003123	0.07433	18	-2676.61	19	-2676.4	0.07469	0.0001	5.27075	0.425802	1	0.514056
OG0003160	0.08065	18	-2324.71	19	-2324.71	0.08065	1.04757	5.35554	-0.000288	1	invalid
OG0003146	0.23383	18	-4025.45	19	-4017.26	0.24612	0.0001	2.29198	16.3741	1	5.1991e-05
OG0003110	0.05269	18	-2926	19	-2925.79	0.05291	0.0001	4.87541	0.411116	1	0.521404
OG0003147	0.0585	18	-2455.29	19	-2455.06	0.05881	0.0001	6.26582	0.459782	1	0.497726
OG0003060	0.05174	18	-5781.27	19	-5781.22	0.05155	0.07801	4.79669	0.107766	1	0.742702
OG0003029	0.21582	18	-5325.14	19	-5324.56	0.22024	0.12039	3.50525	1.1625	1	0.280948
OG0003043	0.07259	18	-6257.62	19	-6257.56	0.07337	0.06517	2.26615	0.123078	1	0.72572
OG0003121	0.08568	18	-3075.56	19	-3075.08	0.0824	0.13836	3.92074	0.962208	1	0.326631
OG0003109	0.2608	18	-4870.66	19	-4869.86	0.26185	0.0001	4.34097	1.59168	1	0.207086
OG0003141	0.11438	18	-4122.3	19	-4122.26	0.11406	0.168	4.1157	0.094496	1	0.758537
OG0003095	0.14072	18	-4233.89	19	-4231.86	0.13907	999	2.65275	4.04719	1	0.0442449
OG0003053	0.02797	18	-4650.39	19	-4650.39	0.02797	0.12751	5.28998	-7.2e-05	1	invalid
OG0003154	0.11523	18	-3963.21	19	-3963.19	0.11451	0.12412	5.76907	0.039776	1	0.841919
OG0003062	0.04443	18	-4779.07	19	-4779.07	0.04443	1.02194	5.232	-0.000168	1	invalid
OG0003169	0.12422	18	-3529.13	19	-3529.12	0.12463	0.11236	3.84041	0.02201	1	0.882061
OG0003163	0.11771	18	-2461.25	19	-2461.12	0.11894	0.06719	4.67535	0.27767	1	0.598232
OG0003150	0.37474	18	-4608.65	19	-4604.27	0.34051	0.74374	3.05699	8.7552	1	0.00308721
OG0003099	0.02649	18	-2880.22	19	-2880.03	0.02672	0.0001	5.32471	0.378346	1	0.53849
OG0003124	0.04445	18	-3203.56	19	-3203.52	0.04417	0.05934	5.7155	0.065924	1	0.797367
OG0003119	0.23505	18	-5327.79	19	-5326.26	0.23699	0.0001	3.986	3.05781	1	0.0803497
OG0003107	0.14005	18	-2707.83	19	-2707.83	0.14005	1.04512	3.02167	-5.2e-05	1	invalid
OG0003102	0.04893	18	-3227.12	19	-3227.1	0.04857	0.08271	3.53242	0.048228	1	0.826176
OG0003021	0.10096	18	-5842.72	19	-5842.73	0.10096	1.04657	4.03542	-0.000128	1	invalid
OG0003112	0.08198	18	-6084.59	19	-6083.65	0.0825	0.0001	3.2077	1.86743	1	0.171769
OG0003079	0.13123	18	-6678.17	19	-6676.42	0.12658	0.27185	2.57905	3.50147	1	0.0613145
OG0003129	0.02712	18	-3052.2	19	-3052.2	0.02692	0.02917	2.89943	0.010506	1	0.918361
OG0003098	0.0465	18	-3620.37	19	-3620.37	0.0465	0.0001	6.30209	9e-05	1	0.992431
OG0003157	0.02775	18	-3735.29	19	-3734.58	0.02657	0.06484	6.2913	1.4178	1	0.233766
OG0003117	0.11506	18	-3967.52	19	-3967.52	0.11506	0.0001	3.94803	0.000208	1	0.988493
OG0003149	0.03183	18	-2929.99	19	-2929.99	0.03183	0.0001	2.71621	3.8e-05	1	0.995082
OG0003077	0.06406	18	-5354.03	19	-5353.72	0.06448	0.0001	5.18467	0.614896	1	0.43295
OG0003092	0.02276	18	-5264.09	19	-5263.72	0.02291	0.0001	3.82322	0.729766	1	0.392959
OG0003085	0.10456	18	-4732.31	19	-4729.95	0.10235	250.012	4.21184	4.72351	1	0.029753
OG0003151	0.08211	18	-5928.68	19	-5927.58	0.08276	0.0001	3.83094	2.19766	1	0.13822
OG0003125	0.0708	18	-3757.13	19	-3756.15	0.06858	0.30153	4.60359	1.96032	1	0.161479
OG0003130	0.08734	18	-5697.79	19	-5697.23	0.08664	0.42304	2.57487	1.10727	1	0.292676
OG0003166	0.03648	18	-4582.86	19	-4581.26	0.03736	0.0001	4.59539	3.20614	1	0.0733622
OG0003100	0.04313	18	-6829.07	19	-6828.8	0.04324	0.0001	5.05327	0.535382	1	0.464353
OG0003094	0.03298	18	-6300.69	19	-6300.43	0.0331	0.0001	3.29218	0.534726	1	0.464627
OG0003137	0.06514	18	-4539.8	19	-4539.63	0.0653	0.0001	3.54386	0.32982	1	0.565765
OG0003165	0.23015	18	-7640.67	19	-7640.67	0.23015	1.04326	3.65063	5e-05	1	0.994358
OG0003140	0.04649	18	-5801.4	19	-5800.81	0.04601	0.23322	6.18718	1.17982	1	0.277392
OG0003156	0.08993	18	-4631.26	19	-4630.62	0.0905	0.0001	3.72608	1.28734	1	0.256538
OG0003171	0.06334	18	-1324.56	19	-1322.77	0.06779	0.0001	1.85136	3.57611	1	0.0586163
OG0003194	0.09028	18	-1666.49	19	-1666.25	0.09097	0.0001	4.03727	0.494026	1	0.482137
OG0003142	0.20148	18	-6401.14	19	-6401.02	0.20097	0.4121	4.58896	0.25109	1	0.616309
OG0003170	0.1834	18	-5639.28	19	-5639	0.18025	0.23937	4.5957	0.55345	1	0.456911
OG0003091	0.18944	18	-7733.27	19	-7732.46	0.1902	0.0001	2.85084	1.62143	1	0.202893
OG0003153	0.02747	18	-5430.4	19	-5430.1	0.02675	0.04232	4.81032	0.607904	1	0.435578
OG0003113	0.19049	18	-7736.72	19	-7736.72	0.19049	1.0494	3.42962	0.0002	1	0.988717
OG0003177	0.00456	18	-1298.84	19	-1298.82	0.00459	0.0001	4.59633	0.035102	1	0.851382
OG0003191	0.19712	18	-2956.95	19	-2956.95	0.19712	3.71713	4.52431	-0.000578	1	invalid
OG0003200	0.14756	18	-2590.15	19	-2590.15	0.14756	17.9827	4.67195	6.6e-05	1	0.993518
OG0003122	0.05247	18	-6458	19	-6457.97	0.05228	0.0649	5.27243	0.068042	1	0.794209
OG0003164	0.05405	18	-5532.44	19	-5532.44	0.05405	0.0001	3.4987	0.000104	1	0.991863
OG0003127	0.07168	18	-2620.52	19	-2620.94	0.07164	1.04019	4.16101	-0.85691	1	invalid
OG0003032	0.04901	18	-6149.25	19	-6147.76	0.05048	0.0001	3.55275	2.98298	1	0.084144
OG0003185	0.15924	18	-2589.84	19	-2588.79	0.15068	0.29691	6.68868	2.09601	1	0.147684
OG0003143	0.14313	18	-5820.68	19	-5820.41	0.13986	0.1812	5.33892	0.536998	1	0.46368
OG0003126	0.01792	18	-5123.21	19	-5123.21	0.01792	109.002	8.67024	0.000474	1	0.98263
OG0003174	0.07896	18	-2887.9	19	-2886.64	0.07786	999	3.77981	2.51471	1	0.112789
OG0003182	0.15645	18	-4873.95	19	-4872.84	0.15757	0.0001	4.00735	2.2181	1	0.136401
OG0003178	0.07009	18	-4201.23	19	-4200.98	0.06935	0.17296	7.24019	0.485524	1	0.485931
OG0003203	0.23937	18	-4517.78	19	-4517.48	0.2426	0.16498	3.14279	0.59877	1	0.439048
OG0003207	0.03227	18	-2793.79	19	-2793.79	0.03227	0.0001		2.2e-05	1	0.996258
OG0003184	0.6094	18	-5595.49	19	-5595.05	0.6081	999	3.06652	0.883664	1	0.3472
OG0003105	0.05189	18	-6995.59	19	-6995.56	0.05211	0.04374	3.41525	0.057524	1	0.810453
OG0003173	0.17612	18	-5389.27	19	-5386.1	0.18162	0.02452	4.05668	6.34001	1	0.0118044
OG0003193	0.14437	18	-4210.59	19	-4210.59	0.14437	0.0001	5.28251	7.2e-05	1	0.99323
OG0003172	0.22352	18	-4596.74	19	-4596.74	0.22352	0.0001	2.76019	5.8e-05	1	0.993924
OG0003180	0.12362	18	-4858.21	19	-4857.53	0.12565	0.03963	3.71548	1.36209	1	0.243175
OG0003176	0.26425	18	-5444.17	19	-5444.17	0.26425	0.0001	3.02637	0.000126	1	0.991044
OG0003218	0.15138	18	-1271.42	19	-1271.42	0.15138	0.0001	2.45737	3.6e-05	1	0.995213
OG0003183	0.08752	18	-4362.43	19	-4362.43	0.08752	1.00477	3.68052	-0.000196	1	invalid
OG0003226	0.16146	18	-1940.88	19	-1940.57	0.16596	0.10387	3.01043	0.603094	1	0.4374
OG0003250	0.03004	18	-1732.42	19	-1732.42	0.03004	1.04836	6.07845	-1.6e-05	1	invalid
OG0003211	0.08279	18	-7245.41	19	-7245.05	0.08164	0.12212	4.82514	0.71009	1	0.399414
OG0003213	0.04124	18	-4074.28	19	-4074.07	0.04139	0.0001	2.32227	0.421562	1	0.516159
OG0003215	0.09403	18	-2692.23	19	-2692	0.09272	0.17628	4.97498	0.453828	1	0.500523
OG0003201	0.04346	18	-3973.07	19	-3972.94	0.04361	0.0001	3.72779	0.261054	1	0.609397
OG0003197	0.13729	18	-4520.99	19	-4520.28	0.13954	0.0001	2.25341	1.41852	1	0.233647
OG0003198	0.03789	18	-6172.33	19	-6171.07	0.03852	0.0001	3.05882	2.519	1	0.112482
OG0003222	0.1202	18	-2422.97	19	-2422.97	0.1202	1.04927	3.81074	5.6e-05	1	0.994029
OG0003240	0.19672	18	-2194.16	19	-2194.09	0.19594	0.33738	3.31981	0.144362	1	0.703983
OG0003204	0.64201	18	-7455.88	19	-7455.88	0.64201	144.392	3.19844	0.000692	1	0.979013
OG0003144	0.09933	18	-7492.16	19	-7492.1	0.09974	0.06886	5.14019	0.126618	1	0.721965
OG0003210	0.08111	18	-6559.02	19	-6559.02	0.08111	1.04591	5.7635	-0.000264	1	invalid
OG0003216	0.2948	18	-2770.73	19	-2770.71	0.29679	0.26668	2.49739	0.045174	1	0.831684
OG0003251	0.05746	18	-3777.73	19	-3776.86	0.05844	0.0001	4.13498	1.73086	1	0.188301
OG0003233	0.01758	18	-2835.24	19	-2835.23	0.01768	0.0001	6.82553	0.0115	1	0.9146
OG0003247	0.08218	18	-3144.35	19	-3144.35	0.08218	1.04795	1.96565	-7.2e-05	1	invalid
OG0003217	0.01401	18	-2907.75	19	-2907	0.01544	0.0001	6.49359	1.49899	1	0.220827
OG0003244	0.04329	18	-4385.36	19	-4382.59	0.04508	0.0001	3.53107	5.55247	1	0.0184546
OG0003205	0.21274	18	-9884.87	19	-9884.85	0.21287	0.16749	4.13123	0.03675	1	0.847975
OG0003221	0.05376	18	-4490.33	19	-4490.21	0.05348	0.09701	4.74632	0.236812	1	0.626518
OG0003225	0.12371	18	-3759.53	19	-3759.24	0.12407	0.0001	4.51038	0.584984	1	0.444365
OG0003206	0.09194	18	-7066.37	19	-7066.37	0.09194	0.8088	4.65759	-0.00038	1	invalid
OG0003257	0.20495	18	-1377.13	19	-1377.12	0.20406	0.21923	3.0752	0.011378	1	0.915053
OG0003271	0.0464	18	-865.965	19	-865.965	0.0464	1.04813	6.67597	-1e-05	1	invalid
OG0003219	0.19061	18	-5995.7	19	-5995.16	0.19107	0.0001	4.44677	1.06984	1	0.300981
OG0003208	0.08479	18	-7164.34	19	-7164.33	0.08447	0.09072	2.17092	0.027604	1	0.868043
OG0003242	0.11382	18	-4623.44	19	-4622.7	0.11533	0.0001	3.41301	1.47379	1	0.224749
OG0003246	0.02212	18	-3966.5	19	-3964	0.01891	0.07406	4.54184	5.00515	1	0.025272
OG0003238	0.05878	18	-4648.47	19	-4648.45	0.05865	0.07449	4.09659	0.03991	1	0.841657
OG0003195	0.21493	18	-8966.66	19	-8966.66	0.21493	1.04662	2.21197	-7.2e-05	1	invalid
OG0003239	0.18799	18	-5278.13	19	-5278.02	0.1897	0.15425	4.62264	0.216196	1	0.641954
OG0003286	0.02479	18	-2593.82	19	-2593.82	0.02479	0.0001	5.21886	1e-05	1	0.997477
OG0003223	0.05076	18	-5283.84	19	-5283.84	0.05076	0.0001	4.78998	0.000456	1	0.982963
OG0003230	0.12514	18	-7914.18	19	-7914.03	0.12436	0.16009	5.37714	0.29409	1	0.587611
OG0003268	0.17463	18	-2644.17	19	-2643.87	0.17808	0.10486	4.46202	0.591806	1	0.441722
OG0003224	0.10202	18	-4336.43	19	-4336.43	0.10202	82.0051	4.9316	0.001528	1	0.968819
OG0003295	0.19216	18	-3880.62	19	-3880.6	0.1916	0.21273	4.07883	0.026588	1	0.870473
OG0003305	0.07323	18	-3489.12	19	-3488.7	0.07378	0.0001	3.50462	0.847882	1	0.357152
OG0003273	0.05071	18	-2121.52	19	-2121.52	0.05071	0.67467	4.97118	-9.6e-05	1	invalid
OG0003290	0.02022	18	-2619.75	19	-2619.19	0.02094	0.0001	6.66334	1.11145	1	0.291768
OG0003260	0.17016	18	-2832.75	19	-2828.63	0.18021	0.0001	4.13925	8.2434	1	0.00409005
OG0003265	0.14426	18	-5740.61	19	-5740.12	0.14462	0.0001	3.7273	0.976606	1	0.323038
OG0003212	0.02922	18	-6453.81	19	-6453.41	0.02962	0.0001	3.29504	0.801228	1	0.370726
OG0003220	0.09278	18	-5561.2	19	-5559.53	0.09165	999	4.13328	3.33526	1	0.0678098
OG0003234	0.0323	18	-6331.17	19	-6331.17	0.03238	0.02862	4.06461	0.013894	1	0.906168
OG0003261	0.10362	18	-4488.08	19	-4488.08	0.10362	0.0001	5.14591	4.2e-05	1	0.994829
OG0003272	0.0386	18	-3953.54	19	-3952.13	0.04158	0.0001	3.01107	2.8142	1	0.0934336
OG0003228	0.04334	18	-6737.27	19	-6736.99	0.04346	0.0001	3.81057	0.565916	1	0.451886
OG0003307	0.08132	18	-3967.93	19	-3967.89	0.08195	0.07007	4.04054	0.06988	1	0.791512
OG0003235	0.09682	18	-5660.03	19	-5659.92	0.09703	0.0001	2.69387	0.219154	1	0.639685
OG0003296	0.04816	18	-2773.31	19	-2773.17	0.04835	0.0001	3.97817	0.288856	1	0.590955
OG0003262	0.053	18	-5289.3	19	-5289.29	0.05328	0.0479	5.85759	0.037068	1	0.847327
OG0003232	0.11274	18	-6192.54	19	-6191.25	0.11186	999	3.59114	2.57272	1	0.10872
OG0003288	0.1887	18	-4625.09	19	-4625.06	0.189	0.13955	3.68284	0.06274	1	0.802217
OG0003229	0.17767	18	-6911.99	19	-6909.61	0.17957	0.0001	3.44724	4.76135	1	0.0291057
OG0003278	0.0242	18	-4116.77	19	-4116.75	0.02411	0.02876	3.99853	0.02584	1	0.872292
OG0003279	0.04686	18	-4851.92	19	-4851.92	0.04686	0.0001	3.92335	1.4e-05	1	0.997015
OG0003297	0.11559	18	-4417.69	19	-4417.69	0.11559	1.04557	3.90553	-5.4e-05	1	invalid
OG0003269	0.11889	18	-5302.98	19	-5301.46	0.12068	0.0001	5.73283	3.04767	1	0.080853
OG0003264	0.13623	18	-5064.85	19	-5064.85	0.13623	0.86025	4.98706	-0.00017	1	invalid
OG0003303	0.08213	18	-4912.22	19	-4912.22	0.08213	0.0001	3.91186	3.4e-05	1	0.995348
OG0003330	0.18549	18	-1883.31	19	-1882.66	0.1784	0.34613	4.18058	1.30231	1	0.253792
OG0003283	0.04985	18	-5112.72	19	-5112.61	0.04914	0.06347	5.20948	0.225404	1	0.634953
OG0003310	0.26666	18	-1935.91	19	-1929.6	0.29936	0.0001	3.62059	12.6332	1	0.000378959
OG0003350	0.22143	18	-1527.74	19	-1527.74	0.22143	1.075	5.75441	1.4e-05	1	0.997015
OG0003387	0.19086	18	-1383.11	19	-1383.11	0.19086	1.55942	2.63322	-6e-06	1	invalid
OG0003304	0.04402	18	-6618.82	19	-6618.82	0.04402	0.0001	4.36058	0.000454	1	0.983001
OG0003364	0.1381	18	-2322.36	19	-2319.43	0.15041	0.02183	2.33451	5.84487	1	0.0156225
OG0003255	0.0894	18	-9984.83	19	-9981.19	0.09113	0.01214	2.27659	7.28738	1	0.00694408
OG0003291	0.00861	18	-4696.51	19	-4696.46	0.00865	0.0001	3.45093	0.108114	1	0.742302
OG0003362	0.32392	18	-1877.03	19	-1877.03	0.32392	0.76893	3.70558	-2e-05	1	invalid
OG0003326	0.07618	18	-1404.22	19	-1404.2	0.07677	0.04753	4.01875	0.036354	1	0.848786
OG0003276	0.04966	18	-6152.4	19	-6152.4	0.04968	0.04779	3.21153	0.00123	1	0.972023
OG0003325	0.01282	18	-1502.26	19	-1499.25	0.01188	999	8.52854	6.01775	1	0.0141627
OG0003309	0.02593	18	-1065.45	19	-1065.45	0.02593	39.0149	3.04598	4.6e-05	1	0.994589
OG0003327	0.17253	18	-2653.67	19	-2653.67	0.17253	1.405	3.80047	-5.2e-05	1	invalid
OG0003277	0.0811	18	-4379.77	19	-4377.39	0.08526	0.0001	4.45867	4.75428	1	0.0292255
OG0003293	0.0365	18	-4856.15	19	-4856.02	0.03659	0.0001	7.08559	0.24916	1	0.617667
OG0003354	0.13321	18	-1914.13	19	-1914.09	0.13417	0.09704	2.98707	0.077622	1	0.780546
OG0003349	0.1085	18	-1513.45	19	-1512.77	0.1046	0.35772	2.50683	1.35349	1	0.244668
OG0003227	0.13897	18	-7143.73	19	-7143.61	0.14079	0.11664	5.61444	0.239356	1	0.624672
OG0003287	0.04494	18	-4175.7	19	-4175.55	0.04515	0.0001	3.65303	0.300858	1	0.583345
OG0003256	0.06674	18	-6224.07	19	-6224.07	0.06673	0.06845	3.01554	0.000494	1	0.982268
OG0003388	0.1832	18	-2164.34	19	-2164.26	0.18582	0.14467	3.91176	0.161354	1	0.687913
OG0003370	0.02608	18	-2138.2	19	-2138.2	0.02608	1.03897	4.68002	-3e-05	1	invalid
OG0003368	0.09555	18	-3777.08	19	-3776.14	0.0967	0.0001	4.90696	1.897	1	0.168415
OG0003311	0.03548	18	-2194.05	19	-2194.05	0.03548	0.0001	2.84796	1.2e-05	1	0.997236
OG0003373	0.12185	18	-3684.5	19	-3683.64	0.12284	0.0001	4.09772	1.7054	1	0.191583
OG0003315	0.01415	18	-1569.71	19	-1569.71	0.01415	1.04614	2.95185	-6e-05	1	invalid
OG0003352	0.0159	18	-3173.06	19	-3172.92	0.016	0.0001	4.80232	0.2819	1	0.595459
OG0003339	0.16414	18	-3313.12	19	-3313.12	0.16414	1.04697	2.58342	-4e-05	1	invalid
OG0003317	0.2897	18	-6165.21	19	-6165.21	0.2897	2.13477	2.79605	-0.00011	1	invalid
OG0003312	0.03911	18	-5357.98	19	-5357.98	0.03911	1.10635	5.11748	-0.000324	1	invalid
OG0003324	0.13564	18	-3398.65	19	-3397.9	0.13669	0.0001	4.22098	1.49506	1	0.221432
OG0003356	0.15347	18	-4347.55	19	-4347.55	0.15347	1.04711	4.04263	-7e-05	1	invalid
OG0003334	0.03332	18	-2208.54	19	-2208.54	0.03332	5.30804	5.45661	3.4e-05	1	0.995348
OG0003372	0.06097	18	-3161.44	19	-3161.08	0.06151	0.0001	1.94339	0.735866	1	0.390988
OG0003282	0.09016	18	-6498	19	-6497.67	0.08861	0.13435	4.16443	0.649672	1	0.42023
OG0003284	0.03991	18	-5921.78	19	-5921.71	0.04	0.0001	2.33277	0.145986	1	0.702401
OG0003363	0.1611	18	-4582.34	19	-4581.61	0.15869	0.4693	5.36908	1.46369	1	0.226344
OG0003386	0.147	18	-3088.41	19	-3086.34	0.15532	0.04795	4.02608	4.14918	1	0.0416546
OG0003308	0.01241	18	-4006.88	19	-4006.84	0.01243	0.0001	5.18821	0.082972	1	0.77331
OG0003333	0.2093	18	-5929.55	19	-5929.55	0.2093	1.04224	3.56032	-6.8e-05	1	invalid
OG0003281	0.04161	18	-7353.43	19	-7352.35	0.03981	0.07557	2.68528	2.16302	1	0.141367
OG0003314	0.0756	18	-3444.54	19	-3444.52	0.07586	0.06256	6.44083	0.030106	1	0.86225
OG0003381	0.05087	18	-2354.61	19	-2354.44	0.05108	0.0001	4.90023	0.336908	1	0.561619
OG0003336	0.03334	18	-5027.88	19	-5027.27	0.03386	0.0001	9.14164	1.2102	1	0.271293
OG0003429	0.09082	18	-1996.1	19	-1996.1	0.09082	1.03373	4.4722	5.2e-05	1	0.994246
OG0003385	0.03496	18	-2263.55	19	-2263.55	0.03496	0.0001	5.48435	2e-05	1	0.996432
OG0003369	0.17583	18	-6885.09	19	-6885.09	0.17583	0.17582	4.13752	0	1	1
OG0003383	0.03094	18	-2969.17	19	-2969.1	0.03068	0.04819	3.40977	0.13907	1	0.709207
OG0003417	0.03719	18	-1404.87	19	-1404.72	0.03756	0.0001	5.56381	0.30917	1	0.57819
OG0003374	0.11347	18	-5791.28	19	-5790.03	0.11267	999	5.35132	2.50804	1	0.113267
OG0003343	0.03516	18	-3772.11	19	-3771.5	0.03573	0.0001	5.08773	1.22082	1	0.269199
OG0003424	0.05354	18	-1652.53	19	-1650.67	0.05153	999	4.03944	3.71275	1	0.0539984
OG0003409	0.17558	18	-2500.93	19	-2500.39	0.1768	0.0001	2.37946	1.07825	1	0.299089
OG0003420	0.0993	18	-1167.43	19	-1167.17	0.10058	0.0001	3.71028	0.512254	1	0.474165
OG0003353	0.06776	18	-5718.68	19	-5718.27	0.06932	0.04667	1.99057	0.817814	1	0.36582
OG0003444	0.30132	18	-2887.54	19	-2887.54	0.30132	1.09089	2.31841	-1.8e-05	1	invalid
OG0003413	0.18407	18	-3897.45	19	-3897.43	0.18443	0.16204	4.11437	0.027162	1	0.869094
OG0003478	0.02544	18	-2750.62	19	-2750.62	0.02544	1.04665	5.66763	-4.6e-05	1	invalid
OG0003342	0.07098	18	-5112.34	19	-5111.98	0.07152	0.0001	2.68326	0.716278	1	0.397368
OG0003402	0.07255	18	-2478.9	19	-2478.9	0.07255	1.28779	6.52065	-2e-06	1	invalid
OG0003491	0.40582	18	-2206.54	19	-2202.49	0.36072	1.41855	2.59309	8.09356	1	0.00444227
OG0003501	0.17171	18	-2321.06	19	-2321.06	0.17171	1.0469	3.05104	-5.6e-05	1	invalid
OG0003407	0.00874	18	-3251.08	19	-3251.08	0.00874	0.0001	6.2578	8e-06	1	0.997743
OG0003394	0.06231	18	-3740.37	19	-3729.54	0.04953	0.2493	4.38879	21.6538	1	3.266e-06
OG0003428	0.05642	18	-2179.61	19	-2181.04	0.0561	0.28449	2.7881	-2.86301	1	invalid
OG0003460	0.06311	18	-2116.81	19	-2114.81	0.06945	0.0001	4.64807	3.9998	1	0.0455056
OG0003449	0.04934	18	-2213.34	19	-2213.34	0.04934	1.04245	4.76674	-1.8e-05	1	invalid
OG0003408	0.11974	18	-4462.39	19	-4461.71	0.11694	0.2078	5.55193	1.35758	1	0.243957
OG0003451	0.00566	18	-2486.24	19	-2486.24	0.00566	0.4415	4.48919	-0.000122	1	invalid
OG0003313	0.04507	18	-5369.08	19	-5368.83	0.04648	0.02815	2.18161	0.50931	1	0.475438
OG0003345	0.04831	18	-5982.8	19	-5981.55	0.0499	0.0133	2.34575	2.50398	1	0.113559
OG0003412	0.27608	18	-3883.3	19	-3883.3	0.27608	1.35453	3.20484	-1.2e-05	1	invalid
OG0003494	0.02537	18	-2307.82	19	-2307.65	0.02565	0.0001	4.86683	0.353862	1	0.551935
OG0003434	0.09996	18	-2700.67	19	-2699.18	0.09868	999	4.82349	2.98372	1	0.0841056
OG0003442	0.05259	18	-2952.7	19	-2952.47	0.05285	0.0001	5.71681	0.445878	1	0.504299
OG0003482	0.0783	18	-2657.62	19	-2657.62	0.0783	2.72562	6.5423	-0.00027	1	invalid
OG0003433	0.15651	18	-4364.01	19	-4363.44	0.15223	0.23649	3.9879	1.13549	1	0.286608
OG0003445	0.13143	18	-2634.55	19	-2634.08	0.13223	0.0001	3.35088	0.931948	1	0.334357
OG0003480	0.08731	18	-2424.23	19	-2424.23	0.08731	1.2063	5.48351	1.2e-05	1	0.997236
OG0003404	0.11583	18	-2587.41	19	-2586.81	0.11111	0.1819	5.54636	1.20268	1	0.272787
OG0003415	0.09292	18	-2854.78	19	-2854.1	0.0897	0.18939	2.64526	1.35219	1	0.244895
OG0003380	0.16987	18	-5231.32	19	-5230.43	0.16911	999	4.8173	1.7909	1	0.180816
OG0003393	0.05189	18	-2294.99	19	-2294.99	0.05217	0.04978	3.03555	0.005096	1	0.94309
OG0003476	0.0544	18	-2138.77	19	-2138.77	0.0544	0.93665	3.91753	-7e-05	1	invalid
OG0003414	0.05058	18	-4993.95	19	-4993.61	0.05079	0.0001	3.75411	0.682808	1	0.408621
OG0003405	0.11348	18	-7142.15	19	-7141.22	0.11303	999	5.04242	1.86228	1	0.172361
OG0003503	0.26582	18	-5030.18	19	-5028.97	0.25666	0.42118	2.79153	2.4142	1	0.120239
OG0003466	0.05559	18	-3822.16	19	-3822.01	0.05456	0.07561	6.18062	0.285964	1	0.592819
OG0003463	0.07578	18	-2384.71	19	-2383.28	0.07445	999	5.24448	2.86308	1	0.0906338
OG0003472	0.04276	18	-1925.51	19	-1922.73	0.04018	999	4.13229	5.54877	1	0.0184937
OG0003457	0.0415	18	-2795.05	19	-2794.95	0.04208	0.02679	2.90713	0.207254	1	0.648928
OG0003319	0.06336	18	-4599.28	19	-4599.28	0.06336	1.04201	2.07248	-0.000104	1	invalid
OG0003341	0.369	18	-7650.96	19	-7650.96	0.369	0.0001	3.17714	0.00031	1	0.985953
OG0003397	0.36535	18	-5174.91	19	-5174.91	0.36535	1.08296	3.24261	-3.4e-05	1	invalid
OG0003400	0.13156	18	-4837.37	19	-4837.37	0.13156	1.0423	3.64073	-0.000186	1	invalid
OG0003438	0.39542	18	-4255.8	19	-4255.8	0.39542	1.01263	2.14513	-4e-06	1	invalid
OG0003498	0.16911	18	-2581.77	19	-2581.41	0.17027	0.0001	3.81876	0.71546	1	0.397637
OG0003432	0.28757	18	-5215.46	19	-5215.44	0.28792	0.23936	3.89069	0.033218	1	0.85538
OG0003422	0.09844	18	-3949.57	19	-3949.23	0.09882	0.0001	2.63261	0.676916	1	0.410651
OG0003437	0.09416	18	-4224.38	19	-4224.21	0.09455	0.0001	6.7853	0.347042	1	0.555792
OG0003360	0.03804	18	-7432.64	19	-7431.95	0.03708	0.09921	3.52085	1.37329	1	0.241247
OG0003419	0.04327	18	-3093.33	19	-3093.33	0.04328	0.0001	5.21407	4.8e-05	1	0.994472
OG0003430	0.21973	18	-7429.11	19	-7428.54	0.22016	0.0001	2.91743	1.14824	1	0.283918
OG0003453	0.14011	18	-5270.79	19	-5270.78	0.14008	0.14671	2.49467	0.001412	1	0.970025
OG0003390	0.03957	18	-4192.65	19	-4192.65	0.03957	0.0001	2.33419	3e-05	1	0.99563
OG0003497	0.01679	18	-3563.66	19	-3562.4	0.01824	0.0001	3.9693	2.52684	1	0.111924
OG0003477	0.18681	18	-5327.03	19	-5327.03	0.18688	0.17791	4.08605	0.002268	1	0.962016
OG0003439	0.15237	18	-6014.77	19	-6014.76	0.15237	0.0001	3.32466	0.000834	1	0.976961
OG0003455	0.38812	18	-6835.49	19	-6835.49	0.38812	0.0001	2.82799	0.000146	1	0.990359
OG0003321	0.19088	18	-8203.16	19	-8202.48	0.19042	999	4.59489	1.35475	1	0.244449
OG0003502	0.07266	18	-4410.87	19	-4410.54	0.07219	0.2348	3.63969	0.649278	1	0.420371
OG0003337	0.1745	18	-7160.45	19	-7161.42	0.1739	19.2702	4.17668	-1.94568	1	invalid
OG0003488	0.08144	18	-2350.57	19	-2350.49	0.07813	0.10286	4.56195	0.159968	1	0.689186
OG0003507	0.11727	18	-2871.16	19	-2870.78	0.12038	0.07643	4.4621	0.757414	1	0.384139
OG0003462	0.06446	18	-5530.09	19	-5524.47	0.06095	0.54922	4.24704	11.236	1	0.000802241
OG0003461	0.09767	18	-5239.54	19	-5239.54	0.09767	0.0001	2.9229	5.4e-05	1	0.994137
OG0003518	0.01517	18	-1995.43	19	-1995.3	0.01531	0.0001	2.32127	0.252676	1	0.615197
OG0003371	0.10117	18	-7780.34	19	-7779.53	0.10192	0.0001	3.6045	1.6289	1	0.201855
OG0003443	0.04489	18	-4042.49	19	-4041.87	0.04704	0.02227	2.37415	1.2411	1	0.265259
OG0003535	0.05917	18	-1361.15	19	-1360.45	0.06095	0.0001	3.26596	1.40804	1	0.235383
OG0003471	0.01733	18	-5289.1	19	-5289.1	0.01733	3.47535	3.44656	-0.001978	1	invalid
OG0003505	0.0571	18	-4393.1	19	-4392.61	0.05778	0.0001	3.80162	0.974498	1	0.323561
OG0003509	0.0871	18	-2207.3	19	-2206.29	0.08873	0.0001	2.95962	2.02571	1	0.154657
OG0003406	0.15401	18	-8365.05	19	-8364.08	0.15444	0.0001	4.43824	1.93453	1	0.164264
OG0003421	0.01003	18	-3652.38	19	-3651.75	0.00932	0.03983	3.10224	1.24976	1	0.263598
OG0003416	0.0499	18	-3983.14	19	-3981.57	0.04931	248.426	5.34585	3.1454	1	0.0761414
OG0003493	0.15728	18	-6603.92	19	-6603.92	0.15727	10.173	6.45342	0.00105	1	0.97415
OG0003532	0.13451	18	-3136.79	19	-3136.45	0.13504	0.0001	3.30487	0.684472	1	0.408051
OG0003533	0.05954	18	-2611.25	19	-2610.86	0.06219	0.02694	3.89961	0.78637	1	0.3752
OG0003483	0.18402	18	-7617.87	19	-7617.87	0.18402	0.94364	5.27695	-0.000106	1	invalid
OG0003378	0.07385	18	-7272.16	19	-7271.92	0.07396	0.0001	3.80426	0.482522	1	0.487282
OG0003519	0.12895	18	-3109.44	19	-3109.09	0.12956	0.0001	4.17768	0.704766	1	0.401187
OG0003318	0.18398	18	-6271.5	19	-6270.31	0.1822	1.75223	4.49617	2.374	1	0.123371
OG0003514	0.00957	18	-3601.92	19	-3601.58	0.00979	0.0001	5.82416	0.675836	1	0.411024
OG0003446	0.01694	18	-4614.6	19	-4614.49	0.01656	0.02854	4.57095	0.227718	1	0.633221
OG0003536	0.54427	18	-3035.08	19	-3034.99	0.55341	0.46609	2.32625	0.183874	1	0.668065
OG0003522	0.23592	18	-2883.64	19	-2883.64	0.23592	0.0001	2.01367	2.6e-05	1	0.995932
OG0003481	0.15516	18	-7718.67	19	-7718.67	0.15516	1.13667	3.40999	-0.000112	1	invalid
OG0003547	0.02939	18	-2433.57	19	-2433.57	0.02939	1.04781	7.53554	8.4e-05	1	0.992687
OG0003540	0.05722	18	-2512.06	19	-2511.96	0.05634	0.07863	5.08164	0.208736	1	0.64776
OG0003543	0.01596	18	-3225.89	19	-3225.89	0.01596	1.0479	9.82758	-5e-05	1	invalid
OG0003506	0.02967	18	-1958.91	19	-1958.91	0.02967	0.30579	1.85801	-6.8e-05	1	invalid
OG0003508	0.10223	18	-2309.54	19	-2309.47	0.10147	0.16138	3.67749	0.12836	1	0.720139
OG0003529	0.01032	18	-4273.31	19	-4272.41	0.00989	0.06246	7.18886	1.78265	1	0.181824
OG0003537	0.04151	18	-3231.93	19	-3229.92	0.04076	999	3.15953	4.01693	1	0.0450457
OG0003513	0.03044	18	-3273.92	19	-3273.6	0.0308	0.0001	5.63357	0.646522	1	0.421359
OG0003525	0.12203	18	-4531.01	19	-4527.53	0.11279	0.2989	5.54121	6.9667	1	0.00830404
OG0003487	0.11819	18	-7476.54	19	-7476.01	0.115	0.15407	5.88722	1.04735	1	0.306118
OG0003541	0.16351	18	-3326.23	19	-3326.23	0.16351	0.0001	3.51805	0.000274	1	0.986793
OG0003510	0.10119	18	-4589.34	19	-4589.34	0.10119	1.04677	3.97526	-8.2e-05	1	invalid
OG0003436	0.07716	18	-6855.02	19	-6855.02	0.07716	1.04638	3.15568	-0.000122	1	invalid
OG0003454	0.07381	18	-6674.95	19	-6674.78	0.07393	0.0001	2.39399	0.355236	1	0.551164
OG0003517	0.13551	18	-6125.68	19	-6125.68	0.13551	0.77649	6.4356	-9.2e-05	1	invalid
OG0003470	0.10276	18	-7128.9	19	-7128.8	0.10166	0.12455	3.13207	0.192908	1	0.660507
OG0003531	0.12603	18	-5079.29	19	-5079.29	0.12603	0.0001	2.54174	0.000818	1	0.977183
OG0003511	0.18596	18	-2194.75	19	-2193.27	0.16454	24.4764	2.85695	2.96414	1	0.0851295
OG0003562	0.17609	18	-930.728	19	-929.542	0.16945	999	4.04337	2.37231	1	0.123504
OG0003465	0.09739	18	-4663.46	19	-4661.95	0.09415	0.36672	4.74502	3.02344	1	0.0820692
OG0003554	0.03444	18	-1647.53	19	-1647.45	0.03471	0.0001	5.04667	0.157864	1	0.691131
OG0003544	0.11249	18	-5524.62	19	-5523.46	0.11348	0.0001	3.31843	2.30998	1	0.128546
OG0003560	0.10789	18	-1676.33	19	-1675.62	0.10983	0.0001	5.56449	1.42354	1	0.232822
OG0003526	0.04293	18	-2786.94	19	-2786.79	0.04312	0.0001	3.3507	0.296432	1	0.586128
OG0003534	0.16334	18	-5413.62	19	-5412.97	0.16051	0.36885	3.62364	1.29391	1	0.255328
OG0003553	0.28105	18	-3749.98	19	-3749.98	0.28105	23.2636	3.74081	6.4e-05	1	0.993617
OG0003552	0.01828	18	-2002.91	19	-2002.83	0.01784	0.0276	2.11166	0.144684	1	0.703668
OG0003599	0.08542	18	-1817.05	19	-1816.4	0.08873	0.03005	4.08092	1.2984	1	0.254506
OG0003576	0.11083	18	-2789.79	19	-2788.49	0.11341	0.0001		2.59481	1	0.107214
OG0003516	0.12431	18	-9137.46	19	-9137.46	0.12431	0.0001	3.22961	9e-05	1	0.992431
OG0003530	0.03293	18	-6293.67	19	-6292.92	0.03444	0.01535	2.82229	1.48917	1	0.222346
OG0003602	0.33254	18	-4102.34	19	-4102.34	0.33254	1.06862	2.64069	-2.6e-05	1	invalid
OG0003595	0.04934	18	-2828.1	19	-2827.92	0.04969	0.0001	4.4304	0.364246	1	0.546158
OG0003601	0.08753	18	-3019.79	19	-3019.57	0.08781	0.0001	2.78441	0.443626	1	0.505378
OG0003546	0.20478	18	-4028.83	19	-4028.83	0.2048	0.2011	5.38137	0.000164	1	0.989782
OG0003571	0.14989	18	-3015.74	19	-3015.54	0.15115	0.07293	4.82923	0.385902	1	0.534461
OG0003569	0.01292	18	-2460.02	19	-2460.02	0.01292	1.02738	4.09819	-0.000364	1	invalid
OG0003566	0.17492	18	-2022.84	19	-2021.44	0.18364	0.0001	3.20697	2.81712	1	0.0932636
OG0003523	0.27607	18	-3651.51	19	-3648.71	0.26946	326.869	2.48118	5.59413	1	0.0180208
OG0003568	0.29358	18	-4341.34	19	-4341.34	0.29357	1.08418	3.67467	-2.2e-05	1	invalid
OG0003559	0.04636	18	-3656.29	19	-3651.94	0.05304	0.00614	4.9098	8.70077	1	0.00318075
OG0003585	0.41402	18	-7392.34	19	-7392.34	0.41402	1.00527	3.06019	-6e-06	1	invalid
OG0003586	0.15131	18	-3244.6	19	-3244.6	0.15129	0.15173	5.11391	1e-05	1	0.997477
OG0003565	0.17496	18	-4836.84	19	-4836.82	0.17547	0.15713	3.70928	0.037454	1	0.846544
OG0003572	0.05744	18	-2606.51	19	-2606.51	0.05744	0.0001	3.277	0.000184	1	0.989177
OG0003593	0.23071	18	-3225.52	19	-3218.45	0.27612	0.03899	2.71773	14.1304	1	0.000170568
OG0003592	0.07402	18	-2877.89	19	-2877.31	0.07663	0.02822	4.16505	1.16713	1	0.279991
OG0003635	0.32485	18	-1807.5	19	-1807.5	0.32485	1.06264	3.3844	-1.6e-05	1	invalid
OG0003581	0.05956	18	-3591.27	19	-3591.27	0.05956	0.0001	3.74385	0.000188	1	0.98906
OG0003604	0.27903	18	-2326.23	19	-2326.23	0.27903	0.0001	3.40089	5.4e-05	1	0.994137
OG0003596	0.05671	18	-4392.16	19	-4392.16	0.05671	1.04719	5.13883	-0.000124	1	invalid
OG0003591	0.17453	18	-6306.64	19	-6305.62	0.17977	0.10408	5.12231	2.04355	1	0.152853
OG0003606	0.03145	18	-2081.96	19	-2081.96	0.03145	1.04733	3.89329	1.2e-05	1	0.997236
OG0003557	0.06561	18	-4281.64	19	-4281.41	0.0666	0.03435	2.95813	0.451684	1	0.501536
OG0003621	0.02745	18	-1937.38	19	-1937.38	0.02735	0.02927	4.99156	0.003984	1	0.949672
OG0003613	0.05271	18	-2834.85	19	-2834.6	0.05303	0.0001	5.17886	0.504146	1	0.477684
OG0003587	0.05229	18	-4690.63	19	-4690.63	0.05229	1.04623	2.37364	-0.000488	1	invalid
OG0003628	0.1574	18	-1911.14	19	-1910.82	0.15856	0.0001	2.33965	0.64076	1	0.423436
OG0003648	0.0086	18	-2046.75	19	-2046.75	0.0086	1.04468	3.88022	-0.000146	1	invalid
OG0003640	0.09635	18	-2847.56	19	-2846.21	0.10119	0.03948	2.59713	2.69084	1	0.100926
OG0003637	0.25312	18	-4608.52	19	-4608.52	0.25312	1.04283	2.83226	-7.2e-05	1	invalid
OG0003654	0.05286	18	-3587.89	19	-3587.89	0.05286	1.04682	3.18742	-0.000272	1	invalid
OG0003618	0.36123	18	-4637.64	19	-4636.76	0.36277	0.0001	3.49992	1.76767	1	0.183671
OG0003616	0.13587	18	-5132.76	19	-5132.76	0.13587	1.04623	3.97269	-0.000116	1	invalid
OG0003633	0.19794	18	-5167	19	-5166.97	0.19732	0.23143	5.6736	0.06005	1	0.806417
OG0003608	0.11053	18	-3190.74	19	-3187.61	0.11693	0.0001	3.31995	6.26368	1	0.0123238
OG0003609	0.03232	18	-3685.08	19	-3680.98	0.03641	0.0001	2.02244	8.18567	1	0.00422225
OG0003611	0.16327	18	-4358.48	19	-4358.48	0.16327	0.0001	3.77094	0.00047	1	0.982704
OG0003656	0.3331	18	-4149.98	19	-4149.98	0.3331	0.87098	2.78174	-3.8e-05	1	invalid
OG0003555	0.10104	18	-7416.32	19	-7416.13	0.10066	0.22135	4.31517	0.370538	1	0.542711
OG0003610	0.17552	18	-4138.68	19	-4138.54	0.1766	0.10671	2.20614	0.279772	1	0.596851
OG0003657	0.0689	18	-3829.65	19	-3829.65	0.0689	1.04658	6.03701	-0.00012	1	invalid
OG0003567	0.08212	18	-5276.01	19	-5274.76	0.08153	999	6.87174	2.49734	1	0.114039
OG0003634	0.08354	18	-3359.43	19	-3359.43	0.08354	0.90661	3.07294	-8.2e-05	1	invalid
OG0003632	0.04205	18	-4188.59	19	-4188.42	0.04223	0.0001	4.0808	0.325748	1	0.568174
OG0003652	0.01902	18	-3520.94	19	-3520.8	0.01919	0.0001	2.58062	0.268134	1	0.604586
OG0003603	0.09331	18	-6310.87	19	-6309.68	0.09677	0.04796	3.47131	2.37857	1	0.12301
OG0003639	0.02493	18	-4468.76	19	-4468.26	0.02429	0.05904	6.77929	1.01288	1	0.314213
OG0003650	0.12889	18	-3877.47	19	-3876.74	0.12508	0.22848	6.78125	1.45643	1	0.227499
OG0003617	0.04019	18	-4708.26	19	-4708.26	0.04018	0.0001	3.68314	5.8e-05	1	0.993924
OG0003625	0.05101	18	-4384.01	19	-4383.99	0.05136	0.04629	5.82916	0.042164	1	0.837307
OG0003614	0.07736	18	-4812.02	19	-4810.82	0.07465	0.1627	4.11938	2.40114	1	0.121247
OG0003655	0.04869	18	-3967.16	19	-3967.55	0.04866	0.97902	5.72509	-0.777478	1	invalid
OG0003647	0.03947	18	-5347.2	19	-5345.96	0.04016	0.0001	5.71616	2.48405	1	0.115006
OG0003631	0.06953	18	-6424.53	19	-6424.53	0.06953	1.04661	4.56188	-0.000362	1	invalid
OG0003651	0.03484	18	-6651.03	19	-6651.02	0.03494	0.0333	3.98691	0.00598	1	0.938361
OG0003683	0.09524	18	-1776.36	19	-1776.36	0.09524	1.04759	3.81464	1.8e-05	1	0.996615
OG0003659	0.06927	18	-2638.59	19	-2635.83	0.07426	0.0001	2.73547	5.51933	1	0.0188074
OG0003662	0.26774	18	-1434.13	19	-1434.13	0.26774	63.2337	2.52272	6e-05	1	0.99382
OG0003626	0.10791	18	-4613.57	19	-4613.34	0.10738	999	5.81684	0.451328	1	0.501705
OG0003658	0.43424	18	-2829.24	19	-2829.24	0.43424	0.0001	3.58619	8.8e-05	1	0.992515
OG0003687	0.11171	18	-1682.8	19	-1682.8	0.11171	0.0001	4.7279	5e-05	1	0.994358
OG0003666	0.04511	18	-2607.98	19	-2607.89	0.04595	0.02988	2.9893	0.183374	1	0.66849
OG0003694	0.33454	18	-2228.95	19	-2228.95	0.33454	1.06901	3.90614	-3.4e-05	1	invalid
OG0003649	0.06149	18	-4623.54	19	-4623.54	0.06149	1.04451	3.2099	-0.00017	1	invalid
OG0003698	0.03405	18	-3397.14	19	-3387.2	0.02435	0.35149	2.76703	19.8754	1	8.266e-06
OG0003642	0.01766	18	-5640.81	19	-5640.57	0.01781	0.0001		0.46519	1	0.495208
OG0003702	0.06791	18	-2294.6	19	-2294.31	0.06831	0.0001	4.44542	0.563992	1	0.452656
OG0003653	0.11499	18	-5504.18	19	-5502.74	0.1184	0.02776	2.81045	2.87923	1	0.0897288
OG0003680	0.08676	18	-3288.9	19	-3288.9	0.08676	1.04723	2.47574	-3.8e-05	1	invalid
OG0003709	0.12087	18	-2445.9	19	-2444.13	0.12919	0.02619	3.30639	3.54047	1	0.0598885
OG0003624	0.05184	18	-5427.11	19	-5426.08	0.04816	0.27875	3.70889	2.0535	1	0.151857
OG0003705	0.01852	18	-1580.58	19	-1580.52	0.01862	0.0001	2.76098	0.13137	1	0.717016
OG0003646	0.09543	18	-6694.39	19	-6694.39	0.09542	1.28542	4.56407	9.4e-05	1	0.992264
OG0003688	0.10137	18	-3625.32	19	-3625.11	0.10235	0.05292	3.14537	0.404016	1	0.525022
OG0003636	0.20732	18	-6047.03	19	-6047.03	0.20732	0.0001	3.41552	9.2e-05	1	0.992347
OG0003643	0.14824	18	-8101.21	19	-8101.21	0.14824	1.93436	4.56305	-0.000322	1	invalid
OG0003711	0.18961	18	-4528.2	19	-4527.6	0.18531	0.29706	4.28955	1.19612	1	0.274099
OG0003660	0.08375	18	-4438.2	19	-4438.15	0.08413	0.05973	3.00744	0.105702	1	0.745091
OG0003706	0.08472	18	-3079.38	19	-3079.07	0.08669	0.03998	7.1255	0.621972	1	0.430315
OG0003701	0.29773	18	-5026.61	19	-5026.61	0.29773	1.09855	2.48447	-2e-05	1	invalid
OG0003665	0.12198	18	-4140.34	19	-4140.34	0.12198	0.0001	3.79064	7.2e-05	1	0.99323
OG0003675	0.08515	18	-3261.44	19	-3261.24	0.0823	0.10456	2.37782	0.414774	1	0.519556
OG0003684	0.19966	18	-4274.28	19	-4274.28	0.19966	1.05292	4.22441	-1.4e-05	1	invalid
OG0003710	0.09907	18	-4330.81	19	-4328.71	0.09469	0.38376	4.38352	4.19702	1	0.0404952
OG0003690	0.03455	18	-3053.41	19	-3053.41	0.03455	1.04546	4.47628	-3.2e-05	1	invalid
OG0003712	0.04189	18	-2311.05	19	-2309	0.04028	999	2.68585	4.10744	1	0.0426949
OG0003671	0.0928	18	-5579.53	19	-5579.52	0.0928	77.3947	5.59813	0.0023	1	0.961749
OG0003674	0.13219	18	-3055.46	19	-3055.23	0.13295	0.0001	1.22005	0.464844	1	0.495369
OG0003708	0.06214	18	-3829.41	19	-3826.71	0.06572	0.01075	2.80177	5.39037	1	0.0202482
OG0003668	0.04397	18	-4320.09	19	-4320.09	0.04385	0.04675	2.34474	0.006818	1	0.934193
OG0003719	0.15214	18	-5765.08	19	-5764.35	0.14991	0.29317	3.24463	1.47188	1	0.225049
OG0003707	0.05576	18	-4857.53	19	-4857.31	0.05523	0.12805	3.96709	0.444776	1	0.504826
OG0003723	0.14579	18	-2127.09	19	-2127.06	0.14713	0.12963	4.26064	0.06241	1	0.802727
OG0003736	0.0001	18	-792.536	19	-792.536	0.0001	1.04097	2.85358	-4.6e-05	1	invalid
OG0003661	0.25191	18	-7251.98	19	-7251.98	0.25191	4.18945	3.50702	2e-06	1	0.998872
OG0003700	0.09193	18	-4419.91	19	-4419.78	0.09303	0.06322	3.91719	0.246698	1	0.61941
OG0003686	0.04687	18	-4995.02	19	-4994.42	0.04632	0.23924	4.75483	1.18949	1	0.275432
OG0003692	0.22664	18	-6040.29	19	-6040.22	0.22638	787.475	4.28795	0.124732	1	0.723958
OG0003747	0.01899	18	-1726.57	19	-1726.21	0.018	0.05344	5.75218	0.717238	1	0.397051
OG0003670	0.0559	18	-6068.65	19	-6068.65	0.0559	0.0001	5.11985	0.000112	1	0.991556
OG0003724	0.01813	18	-1337.27	19	-1337.16	0.01856	0.0001	5.50282	0.223336	1	0.63651
OG0003828	0.10667	18	-1090.82	19	-1090.82	0.10667	1.12034	3.67641	-8.4e-05	1	invalid
OG0003679	0.0637	18	-6014.86	19	-6013.17	0.06456	0.0001	2.3488	3.39522	1	0.0653857
OG0003763	0.23662	18	-1538.82	19	-1538.82	0.23662	0.0001	6.13479	3.8e-05	1	0.995082
OG0003734	0.00468	18	-1053.2	19	-1053.2	0.00468	1.04714	2.66454	-2.2e-05	1	invalid
OG0003682	0.06415	18	-5306.52	19	-5306.29	0.06432	0.0001	5.21416	0.472004	1	0.492067
OG0003833	0.52693	18	-1969.06	19	-1969.06	0.52576	0.53994	2.82448	0.003308	1	0.954135
OG0003798	0.14451	18	-1580.9	19	-1580.9	0.14451	0.0001	4.95642	9.8e-05	1	0.992101
OG0003721	0.05314	18	-6017.12	19	-6016.2	0.05367	0.0001	6.47911	1.83025	1	0.176098
OG0003760	0.008	18	-1611.14	19	-1611.11	0.00808	0.0001	4.68412	0.055916	1	0.813071
OG0003775	0.16284	18	-2110.82	19	-2110.82	0.16284	2.40989	2.43885	-0.000324	1	invalid
OG0003811	0.01407	18	-1389.64	19	-1389.64	0.01407	1.05137	5.15657	-8e-05	1	invalid
OG0003664	0.31716	18	-8979.79	19	-8979.68	0.3198	0.2831	3.5362	0.231188	1	0.630644
OG0003801	0.03275	18	-1248.12	19	-1248.12	0.03275	1.04895	3.90098	4e-06	1	0.998404
OG0003824	0.34123	18	-2359.59	19	-2358.76	0.34408	0.0001	3.52851	1.6477	1	0.199273
OG0003821	0.11472	18	-1257.54	19	-1257.45	0.11132	0.14338	5.77486	0.181616	1	0.669988
OG0003750	0.25089	18	-2037.5	19	-2036.87	0.24868	999	5.09045	1.25323	1	0.262936
OG0003769	0.12674	18	-2264.05	19	-2264.05	0.12674	1.04724	4.68078	-4e-06	1	invalid
OG0003685	0.20455	18	-9887.24	19	-9886.85	0.20513	0.0001	3.18804	0.777782	1	0.37782
OG0003813	0.03051	18	-1423.8	19	-1423.8	0.03051	1.05069	2.60433	-1.6e-05	1	invalid
OG0003799	0.1092	18	-1510.22	19	-1510.22	0.1092	0.0001	3.9497	8e-06	1	0.997743
OG0003748	0.04042	18	-4333.34	19	-4333.22	0.04055	0.0001	5.2942	0.249084	1	0.617721
OG0003745	0.01132	18	-3914.14	19	-3914.14	0.01132	1.0423	5.12358	-0.000538	1	invalid
OG0003738	0.25293	18	-3034.91	19	-3034.91	0.25216	0.26781	3.3913	0.013834	1	0.90637
OG0003733	0.02832	18	-1773.4	19	-1772.81	0.02926	0.0001	4.81639	1.18973	1	0.275384
OG0003740	0.03113	18	-2516.19	19	-2516.19	0.03113	1.04637	3.80217	-0.000136	1	invalid
OG0003788	0.10222	18	-1682.81	19	-1682.81	0.10222	0.0001	2.15389	5.6e-05	1	0.994029
OG0003727	0.08679	18	-1524.81	19	-1524.81	0.08679	18.2069	1.54088	0.000308	1	0.985998
OG0003803	0.17283	18	-1771.31	19	-1770.88	0.17963	0.09545	2.4589	0.864542	1	0.352471
OG0003716	0.09849	18	-7202.73	19	-7201.46	0.09624	0.25434	4.41095	2.5423	1	0.110834
OG0003819	0.10379	18	-2380.8	19	-2380.8	0.10379	0.0001	5.34129	6.2e-05	1	0.993718
OG0003749	0.11849	18	-4560	19	-4560	0.11849	1.04656	3.76023	-5.6e-05	1	invalid
OG0003779	0.14353	18	-4147.22	19	-4147.08	0.14135	0.17452	5.56626	0.285572	1	0.593072
OG0003776	0.0946	18	-3445.33	19	-3445.05	0.09495	0.0001	4.00634	0.552094	1	0.457463
OG0003777	0.10606	18	-3685.03	19	-3685.03	0.1061	0.10193	7.20772	0.001036	1	0.974323
OG0003800	0.07055	18	-4620.58	19	-4619.96	0.07106	0.0001	6.26802	1.2528	1	0.263018
[truncated: 1,305 more rows]

## Sheet: ST5
ST5: Branch model with Metapolybia foreground
[truncated: 1,972 more rows]

[truncated: 22 more sheets: ST6, ST7, ST8, ST9, ST10, ST11, ST12, ST13, ST14, ST15, ST16, ST17, ST18, ST19, ST20, ST21, ST22, ST23, ST24, ST25 …]
