# Supplementary material for: Social complexity, life-history and lineage influence the molecular basis of castes in vespid wasps
Source: Nat Commun. 2023 Feb 24;14:1046. doi: 10.1038/s41467-023-36456-6 (PMC9958023; doi:10.1038/s41467-023-36456-6)
Supplement: Supplementary file 11 — Supplementary Data 8 [file 41467_2023_36456_MOESM11_ESM.xlsx]

## Sheet: Polybia morph Data
species	Colony	Caste	MSL	MSW	T2BW	T2AW	T2L	AL	MSH	T1L	T2AH	HW	HL	MID	PWL
Polybia quadricincta	Asa_Wright_2	Q	1.87	1.92	1.37	2.59	2.06	3.97	2.58	1.83	2.14	2.62	2.28	0.94	3.36
Polybia quadricincta	Asa_Wright_2	W	1.81	1.82	1.3	2.5	1.86	3.73	2.4	1.69	1.96	2.59	2.27	0.96	3.3
Polybia quadricincta	Asa_Wright_2	W	1.8	1.85	1.27	2.4	1.91	3.74	2.39	1.75	2.07	2.61	2.23	1.03	3.3
Polybia quadricincta	Asa_Wright_2	W	1.71	1.83	1.3	2.55	1.87	3.91	2.56	1.63	2.1	2.56	2.28	0.93	3.25
Polybia quadricincta	Asa_Wright_2	W	1.91	1.91	1.32	2.57	1.96	3.72	2.6	1.76	2.13	2.63	2.28	0.98	3.28
Polybia quadricincta	Asa_Wright_2	I	1.83	1.86	1.35	2.59	1.88	3.7	2.36	1.77	2.16	2.56	2.27	0.96	3.32
Polybia quadricincta	Asa_Wright_2	W	1.93	1.94	1.32	2.69	2.03	3.85	2.55	1.63	2.1	2.62	2.27	1	3.36
Polybia quadricincta	Asa_Wright_2	W	1.76	1.79	1.29	2.42	1.84	3.64	2.46	1.7	1.98	2.55	2.23	0.94	3.17
Polybia quadricincta	Asa_Wright_2	W	1.84	1.88	1.36	2.63	1.99	3.78	2.44	1.68	2.16	2.61	2.25	0.94	3.33
Polybia quadricincta	Asa_Wright_2	W	1.88	1.94	1.32	2.59	2.03	3.97	2.62	1.7	2.1	2.71	2.31	0.98	3.38
Polybia quadricincta	Asa_Wright_2	W	1.76	1.91	1.35	2.67	2.03	3.82	2.61	1.67	2.34	2.64	2.33	0.98	3.37
Polybia quadricincta	Asa_Wright_2	W	1.82	1.94	1.32	2.6	2.03	3.95	2.56	1.81	2.2	2.61	2.28	0.98	3.3
Polybia quadricincta	Asa_Wright_2	W	1.9	1.93	1.36	2.64	2.05	3.98	2.54	1.75	2.19	2.63	2.28	0.97	3.39
Polybia quadricincta	Asa_Wright_2	W	1.87	1.86	1.28	2.49	2	3.79	2.53	1.72	1.98	2.62	2.27	0.96	3.41
Polybia quadricincta	Asa_Wright_2	W	1.76	1.84	1.32	2.65	1.91	3.72	2.48	1.79	1.97	2.55	2.3	0.93	3.31
Polybia quadricincta	Asa_Wright_2	W	1.91	1.85	1.26	2.54	1.94	3.89	2.53	1.78	1.98	2.65	2.2	0.94	3.37
Polybia quadricincta	Asa_Wright_2	I	1.8	1.84	1.29	2.58	1.85	3.8	2.54	1.72	2.08	2.58	2.28	0.96	3.36
Polybia quadricincta	Asa_Wright_2	W	1.84	1.85	1.28	2.55	1.83	3.68	2.49	1.8	2.1	2.55	2.25	0.92	3.2
Polybia quadricincta	Asa_Wright_2	I	1.86	1.92	1.36	2.76	1.97	3.98	2.52	1.83	2.09	2.6	2.3	0.96	3.29
Polybia quadricincta	Asa_Wright_2	W	1.67	1.87	1.36	2.61	1.93	3.81	2.48	1.76	2.07	2.56	2.3	0.96	3.31
Polybia quadricincta	Asa_Wright_2	W	1.81	1.83	1.31	2.5	1.98	3.78	2.52	1.81	2.3	2.57	2.27	0.94	3.35
Polybia quadricincta	Asa_Wright_2	W	1.78	1.78	1.26	2.47	1.91	3.75	2.52	1.74	2.12	2.5	2.22	0.95	3.14
Polybia quadricincta	Asa_Wright_2	W	1.85	1.89	1.33	2.56	1.85	3.8	2.44	1.7	2.05	2.56	2.3	0.95	3.32
Polybia quadricincta	Asa_Wright_2	W	1.86	1.75	1.29	2.46	1.95	3.8	2.45	1.85	2.02	2.55	2.22	0.92	3.26
Polybia quadricincta	Asa_Wright_2	W	1.84	1.92	1.37	2.6	1.88	3.94	2.55	1.7	2.11	2.62	2.28	0.97	3.34
Polybia quadricincta	Asa_Wright_2	Q	1.86	1.93	1.36	2.66	1.98	4.01	2.62	1.77	2.15	2.62	2.3	0.95	3.39
Polybia quadricincta	Asa_Wright_2	W	1.88	1.9	1.34	2.69	1.96	3.75	2.54	1.78	2.27	2.61	2.29	0.98	3.34
Polybia quadricincta	Asa_Wright_2	W	1.84	1.89	1.27	2.55	1.89	3.78	2.57	1.66	2.08	2.62	2.3	0.99	3.31
Polybia quadricincta	Asa_Wright_2	W	1.87	1.82	1.35	2.55	1.88	3.82	2.52	1.68	2.01	2.57	2.26	0.96	3.25
Polybia quadricincta	Asa_Wright_2	W	1.78	1.88	1.26	2.59	1.84	3.88	2.55	1.55	2.2	2.64	2.28	0.94	3.34
Polybia quadricincta	Asa_Wright_2	W	1.75	1.85	1.22	2.53	1.9	3.55	2.57	1.75	2.24	2.56	2.27	0.95	3.16
Polybia quadricincta	Asa_Wright_2	I	1.97	1.87	1.34	2.69	2.04	3.85	2.67	1.79	2.26	2.6	2.28	0.96	3.35
Polybia quadricincta	Asa_Wright_2	W	1.77	1.84	1.27	2.46	1.92	3.68	2.57	1.79	2.3	2.51	2.22	0.93	3.23
Polybia quadricincta	Asa_Wright_2	W	1.75	1.89	1.28	2.62	1.85	3.7	2.5	1.58	1.99	2.57	2.24	0.93	3.28
Polybia quadricincta	Asa_Wright_2	W	1.82	1.83	1.22	2.57	2.02	3.78	2.63	1.82	2.25	2.56	2.23	0.95	3.27
Polybia quadricincta	Asa_Wright_2	W	1.89	1.9	1.27	2.66	2	3.87	2.74	1.87	2.4	2.5	2.31	0.95	3.35
Polybia quadricincta	Asa_Wright_2	W	1.89	1.89	1.35	2.62	2.1	3.9	2.61	1.67	2.18	2.62	2.29	0.99	3.33
Polybia quadricincta	Asa_Wright_2	W	1.87	1.87	1.35	2.59	1.9	3.89	2.67	1.7	2.15	2.63	2.33	0.92	3.38
Polybia quadricincta	Asa_Wright_2	W	1.83	1.9	1.35	2.56	1.93	3.96	2.48	1.77	1.91	2.66	2.26	0.97	3.35
Polybia quadricincta	Asa_Wright_2	W	1.78	1.83	1.26	2.43	1.84	3.65	2.47	1.79	1.91	2.6	2.23	0.95	3.27
Polybia quadricincta	Asa_Wright_2	W	1.85	1.9	1.32	2.6	1.96	3.89	2.52	1.86	1.94	2.65	2.24	0.96	3.38
Polybia quadricincta	Asa_Wright_2	W	1.86	1.87	1.26	2.53	1.91	3.87	2.5	1.77	2.26	2.62	2.25	0.97	3.28
Polybia quadricincta	Asa_Wright_2	W	1.85	1.88	1.26	2.6	1.89	3.72	2.59	1.69	2.17	2.59	2.22	0.95	3.24
Polybia quadricincta	Asa_Wright_2	W	1.85	1.89	1.26	2.6	1.99	3.79	2.57	1.88	2.26	2.62	2.22	0.96	3.31
Polybia quadricincta	Asa_Wright_2	W	1.8	1.86	1.26	2.5	1.86	3.86	2.55	1.8	2.02	2.48	2.16	0.89	3.23
Polybia quadricincta	Asa_Wright_2	W	1.81	1.84	1.29	2.5	1.91	3.85	2.39	1.81	1.9	2.55	2.21	0.92	3.18
Polybia quadricincta	Asa_Wright_2	W	1.8	1.84	1.26	2.52	1.93	3.77	2.45	1.72	2.02	2.61	2.2	0.95	3.25
Polybia quadricincta	Asa_Wright_2	W	1.84	1.77	1.29	2.48	1.83	3.74	2.4	1.68	2.08	2.53	2.22	0.94	3.24
Polybia quadricincta	Asa_Wright_2	W	1.8	1.84	1.22	2.54	1.95	3.77	2.44	1.74	2.09	2.52	2.19	0.94	3.24
Polybia quadricincta	Asa_Wright_2	W	1.89	1.8	1.27	2.53	1.97	3.85	2.51	1.84	1.95	2.62	2.23	0.99	3.35
Polybia quadricincta	Asa_Wright_2	W	1.69	1.83	1.29	2.41	1.94	3.72	2.5	1.75	2.15	2.54	2.23	0.95	3.14
Polybia quadricincta	Asa_Wright_2	I	1.79	1.85	1.28	2.55	1.82	3.81	2.5	1.71	1.99	2.6	2.22	0.92	3.23
Polybia quadricincta	Asa_Wright_2	W	1.78	1.82	1.32	2.5	1.91	3.72	2.48	1.74	2	2.55	2.19	0.95	3.2
Polybia quadricincta	Asa_Wright_2	W	1.84	1.84	1.34	2.54	2.01	3.9	2.49	1.79	1.98	2.6	2.25	0.95	3.37
Polybia quadricincta	Asa_Wright_2	W	1.84	1.86	1.33	2.61	1.95	3.9	2.53	1.8	2.07	2.6	2.21	0.94	3.36
Polybia quadricincta	Asa_Wright_2	W	1.83	1.88	1.32	2.63	1.87	3.92	2.54	1.75	2.21	2.63	2.25	0.92	3.28
Polybia quadricincta	Asa_Wright_2	W	1.8	1.84	1.25	2.43	1.98	3.78	2.47	1.67	1.91	2.51	2.22	0.91	3.18
Polybia quadricincta	Asa_Wright_2	W	1.73	1.82	1.26	2.47	1.73	3.74	2.42	1.59	1.93	2.51	2.21	0.9	3.08
Polybia quadricincta	Asa_Wright_2	W	1.82	1.88	1.26	2.5	1.97	3.74	2.49	1.69	2.08	2.49	2.15	0.92	3.17
Polybia quadricincta	Asa_Wright_2	W	1.86	1.85	1.27	2.53	1.95	3.76	2.46	1.73	1.96	2.56	2.22	0.91	3.23
Polybia quadricincta	Asa_Wright_2	W	1.71	1.88	1.33	2.62	1.83	3.8	2.5	1.66	2.15	2.55	2.25	0.91	3.21
Polybia quadricincta	Asa_Wright_2	W	1.78	1.79	1.24	2.44	1.79	3.78	2.42	1.64	1.97	2.59	2.24	0.94	3.22
Polybia quadricincta	Asa_Wright_2	W	1.82	1.84	1.29	2.53	1.86	3.82	2.43	1.74	1.99	2.59	2.21	0.91	3.28
Polybia quadricincta	Asa_Wright_2	W	1.73	1.77	1.2	2.34	1.72	3.67	2.58	1.6	2	2.4	2.18	0.91	3.1
Polybia quadricincta	Asa_Wright_2	Q	1.8	1.86	1.25	2.47	1.97	3.8	2.63	1.75	2.33	2.55	2.18	0.95	3.21
Polybia quadricincta	Asa_Wright_2	W	1.86	1.87	1.34	2.58	1.86	3.94	2.48	1.66	2.21	2.58	2.3	0.96	3.23
Polybia quadricincta	Asa_Wright_2	W	1.78	1.82	1.26	2.49	1.85	3.77	2.48	1.59	2.15	2.58	2.21	0.95	3.26
Polybia quadricincta	Asa_Wright_2	I	1.86	1.93	1.37	2.65	2	3.79	2.56	1.78	2.33	2.61	2.29	0.98	3.39
Polybia quadricincta	Asa_Wright_2	W	1.79	1.89	1.3	2.49	1.95	3.84	2.6	1.6	2.11	2.55	2.26	0.93	3.31
Polybia quadricincta	Asa_Wright_2	W	1.86	1.89	1.27	2.53	1.9	3.86	2.52	1.83	2.21	2.53	2.25	0.92	3.28
Polybia quadricincta	Asa_Wright_2	W	1.77	1.83	1.26	2.53	1.76	3.7	2.43	1.7	1.93	2.47	2.18	0.9	3.11
Polybia quadricincta	Asa_Wright_2	W	1.81	1.85	1.29	2.5	1.89	3.79	2.47	1.71	1.98	2.5	2.18	0.93	3.26
Polybia quadricincta	Asa_Wright_2	W	1.8	1.84	1.29	2.51	1.94	3.76	2.52	1.75	1.95	2.55	2.22	0.91	3.21
Polybia quadricincta	Asa_Wright_2	W	1.79	1.87	1.34	2.64	1.95	3.86	2.52	1.71	1.98	2.59	2.21	0.93	3.27
Polybia quadricincta	Asa_Wright_2	W	1.69	1.75	1.21	2.5	1.88	3.64	2.23	1.77	2.04	2.46	2.15	0.9	3.11
Polybia quadricincta	Asa_Wright_2	W	1.75	1.88	1.29	2.57	1.86	3.81	2.51	1.69	2.14	2.6	2.22	0.94	3.27
Polybia quadricincta	Asa_Wright_2	W	1.77	1.83	1.31	2.61	1.91	3.87	2.64	1.84	2.28	2.58	2.21	0.95	3.24
Polybia quadricincta	Asa_Wright_2	W	1.85	1.84	1.23	2.51	1.93	3.83	2.45	1.86	1.99	2.56	2.23	0.94	3.23
Polybia quadricincta	Asa_Wright_2	W	1.6	1.8	1.36	2.51	1.82	3.58	2.39	1.73	2.29	2.55	2.23	0.93	3.19
Polybia quadricincta	Asa_Wright_2	W	1.68	1.75	1.26	2.49	1.81	3.61	2.32	1.62	2.02	2.51	2.14	0.89	3.21
Polybia quadricincta	Asa_Wright_2	W	1.78	1.81	1.19	2.47	1.85	3.73	2.41	1.75	1.89	2.56	2.19	0.93	3.18
Polybia quadricincta	Asa_Wright_2	W	1.74	1.87	1.32	2.66	1.94	3.83	2.5	1.69	2.28	2.56	2.24	0.93	3.25
Polybia quadricincta	Asa_Wright_2	W	1.82	1.84	1.23	2.46	1.83	3.72	2.49	1.69	2.05	2.6	2.23	0.93	3.29
Polybia quadricincta	Asa_Wright_2	W	1.86	1.82	1.32	2.55	1.92	3.74	2.47	1.73	2.07	2.59	2.21	0.94	3.21
Polybia quadricincta	Asa_Wright_2	W	1.83	1.8	1.31	2.51	1.87	3.95	2.57	1.68	2.11	2.57	2.24	0.92	3.3
Polybia quadricincta	Asa_Wright_2	W	1.76	1.8	1.29	2.49	1.84	3.78	2.42	1.68	2.13	2.5	2.15	0.94	3.17
Polybia quadricincta	Asa_Wright_2	W	1.71	1.75	1.21	2.46	1.79	3.5	2.45	1.65	1.94	2.5	2.19	0.91	3.11
Polybia quadricincta	Asa_Wright_2	W	1.83	1.86	1.29	2.57	1.86	3.72	2.59	1.72	2.12	2.58	2.23	0.95	3.26
Polybia quadricincta	Asa_Wright_2	Q	1.83	1.85	1.34	2.55	1.82	3.87	2.48	1.59	1.97	2.57	2.23	0.95	3.3
Polybia quadricincta	Asa_Wright_2	W	1.85	1.92	1.33	2.69	2	3.77	2.58	1.68	2.1	2.65	2.28	0.96	3.34
Polybia quadricincta	Asa_Wright_2	I	1.83	1.85	1.27	2.55	1.92	3.82	2.6	1.64	2.17	2.55	2.23	0.92	3.27
Polybia quadricincta	Asa_Wright_2	W	1.8	1.85	1.22	2.57	1.9	3.9	2.55	1.79	2.19	2.53	2.26	0.97	3.2
Polybia quadricincta	Asa_Wright_2	Q	1.85	1.82	1.29	2.54	1.97	3.79	2.49	1.76	2.04	2.55	2.2	0.91	3.15
Polybia quadricincta	Asa_Wright_2	W	1.79	1.86	1.26	2.53	1.9	3.78	2.62	1.82	2.04	2.52	2.21	0.93	3.23
Polybia quadricincta	Asa_Wright_2	W	1.79	1.85	1.31	2.6	1.87	3.79	2.42	1.6	2.14	2.59	2.19	0.92	3.24
Polybia quadricincta	Asa_Wright_2	W	1.82	1.87	1.23	2.63	1.84	3.93	2.5	1.56	2.15	2.55	2.23	0.92	3.24
Polybia quadricincta	Asa_Wright_2	W	1.71	1.79	1.22	2.46	1.74	3.76	2.5	1.66	2.17	2.5	2.15	0.91	3.15
Polybia quadricincta	Asa_Wright_2	W	1.71	1.82	1.27	2.54	1.78	3.8	2.46	1.54	1.91	2.52	2.19	0.92	3.21
Polybia quadricincta	Asa_Wright_2	W	1.85	1.88	1.29	2.55	1.9	3.86	2.55	1.8	2.19	2.53	2.21	0.95	3.27
Polybia quadricincta	Asa_Wright_2	W	1.83	1.86	1.28	2.53	1.88	3.91	2.49	1.71	1.97	2.56	2.27	0.93	3.22
Polybia quadricincta	Asa_Wright_2	W	1.79	1.82	1.26	2.53	2.02	3.77	2.52	1.75	2	2.61	2.23	0.96	3.21
Polybia quadricincta	Asa_Wright_2	I	1.79	1.91	1.28	2.57	1.97	3.78	2.66	1.81	2.24	2.57	2.26	0.97	3.29
Polybia quadricincta	Asa_Wright_2	W	1.86	1.82	1.29	2.42	1.79	3.9	2.43	1.64	1.92	2.51	2.21	0.92	3.3
Polybia quadricincta	Asa_Wright_2	W	1.86	1.9	1.37	2.61	1.95	3.96	2.47	1.71	2.19	2.63	2.31	0.97	3.35
Polybia quadricincta	Asa_Wright_2	W	1.88	1.87	1.33	2.65	1.87	3.91	2.51	1.9	1.99	2.64	2.25	0.94	3.32
Polybia quadricincta	Asa_Wright_2	Q	1.83	1.88	1.3	2.52	1.99	3.82	2.52	1.82	2.11	2.58	2.21	0.93	3.24
Polybia quadricincta	Asa_Wright_2	Q	1.77	1.87	1.31	2.58	1.9	3.83	2.56	1.69	2.01	2.61	2.25	0.96	3.34
Polybia quadricincta	Asa_Wright_2	W	1.83	1.9	1.36	2.67	1.94	4	2.6	1.62	2.21	2.61	2.29	0.98	3.35
Polybia quadricincta	Asa_Wright_2	W	1.79	1.85	1.28	2.54	1.91	3.79	2.52	1.66	2.23	2.53	2.22	0.92	3.26
Polybia quadricincta	Asa_Wright_2	I	1.81	1.83	1.25	2.46	1.86	3.73	2.42	1.73	2.02	2.56	2.21	0.92	3.2
Polybia quadricincta	Asa_Wright_2	W	1.69	1.78	1.21	2.43	1.87	3.62	2.44	1.72	2.16	2.52	2.16	0.88	3.23
Polybia quadricincta	Asa_Wright_2	I	1.89	1.83	1.27	2.54	1.88	3.83	2.63	1.75	1.97	2.61	2.25	0.94	3.28
Polybia quadricincta	Asa_Wright_2	W	1.72	1.87	1.29	2.52	1.86	3.77	2.52	1.55	2.19	2.43	2.2	0.91	3.2
Polybia quadricincta	Asa_Wright_2	W	1.81	1.82	1.29	2.53	1.82	3.85	2.59	1.76	2.3	2.55	2.2	0.91	3.28
Polybia quadricincta	Asa_Wright_2	W	1.83	1.76	1.24	2.43	1.86	3.73	2.45	1.79	1.95	2.51	2.2	0.95	3.23
Polybia quadricincta	Asa_Wright_2	W	1.78	1.84	1.25	2.53	1.89	3.88	2.48	1.7	2.05	2.56	2.21	0.94	3.17
Polybia quadricincta	Asa_Wright_2	W	1.9	1.89	1.33	2.59	2.01	3.87	2.52	1.78	2.05	2.61	2.26	0.93	3.35
Polybia quadricincta	Asa_Wright_2	Q	1.79	1.87	1.32	2.61	1.89	3.85	2.52	1.75	2.04	2.6	2.27	0.96	3.27
Polybia quadricincta	Asa_Wright_3	W	1.85	1.85	1.33	2.53	2.09	3.79	2.53	1.79	2.13	3.3
Polybia quadricincta	Asa_Wright_3	W	1.88	1.76	1.32	2.42	1.92	3.88	2.51	1.72	1.98	3.29
Polybia quadricincta	Asa_Wright_3	W	1.76	1.92	1.31	2.67	2.02	3.96	2.68	1.83	2.33	3.31
Polybia quadricincta	Asa_Wright_3	W	1.78	1.91	1.37	2.4	2.01	4.02	2.47	1.61	2.14	3.54
Polybia quadricincta	Asa_Wright_3	W	1.88	1.91	1.38	2.46	1.97	3.99	2.54	1.6	2.14	3.43
Polybia quadricincta	Asa_Wright_3	W	1.84	1.87	1.3	2.49	2.12	3.98	2.55	1.8	1.89	3.32
Polybia quadricincta	Asa_Wright_3	W	1.85	1.9	1.33	2.41	2.02	3.98	2.56	1.85	2.02	3.37
Polybia quadricincta	Asa_Wright_3	W	1.72	1.9	1.3	2.6	1.97	3.83	2.59	1.9	2.53	3.28
Polybia quadricincta	Asa_Wright_3	W	1.82	1.87	1.29	2.6	2.06	3.81	2.6	1.83	2.25	3.27
Polybia quadricincta	Asa_Wright_3	W	1.82	1.8	1.27	2.62	1.87	3.73	2.48	1.73	2.35	3.29
Polybia quadricincta	Asa_Wright_3	W	1.89	1.88	1.42	2.5	2.02	4.09	2.61	1.8	2.07	3.46
Polybia quadricincta	Asa_Wright_3	W	1.78	1.9	1.33	2.5	2	3.79	2.52	1.77	2.1	3.3
Polybia quadricincta	Asa_Wright_3	W	1.88	1.92	1.31	2.69	1.97	3.82	2.63	1.81	2.25	3.32
Polybia quadricincta	Asa_Wright_3	W	1.84	1.88	1.27	2.56	2.1	3.96	2.44	1.74	2	3.36
Polybia quadricincta	Asa_Wright_3	W	1.74	1.8	1.31	2.37	1.99	3.88	2.41	1.68	2.24	3.27
Polybia quadricincta	Asa_Wright_3	W	1.77	1.79	1.19	2.37	2	3.63	2.51	1.78	2.01	3.31
Polybia quadricincta	Asa_Wright_3	W	1.79	1.87	1.27	2.6	1.97	4.07	2.62	1.83	2.33	3.37
Polybia quadricincta	Asa_Wright_3	W	1.68	1.92	1.44	2.76	1.94	3.95	2.59	1.69	2.18	3.46
Polybia quadricincta	Asa_Wright_3	W	1.82	1.77	1.16	2.47	2.12	3.73	2.54	1.74	2.22	3.33
Polybia quadricincta	Asa_Wright_3	W	1.67	1.9	1.35	2.61	1.88	3.78	2.55	1.75	2.15	3.35
Polybia quadricincta	Asa_Wright_3	W	1.77	1.89	1.3	2.66	1.92	3.75	2.64	1.8	2.36	3.23
Polybia quadricincta	Asa_Wright_3	W	1.84	1.79	1.32	2.66	1.96	3.7	2.33	1.65	1.98	3.3
Polybia quadricincta	Asa_Wright_3	W	1.83	1.86	1.27	2.6	2.01	3.68	2.53	1.8	2.16	3.36
Polybia quadricincta	Asa_Wright_3	W	1.87	1.87	1.36	2.64	2.05	3.88	2.56	1.92	2.15	3.35
Polybia quadricincta	Asa_Wright_3	W	1.65	1.78	1.27	2.35	1.96	3.75	2.58	1.83	2.31	3.28
Polybia quadricincta	Asa_Wright_3	W	1.78	1.93	1.35	2.62	2.07	3.85	2.55	1.8	2.34	3.48
Polybia quadricincta	Asa_Wright_3	W	1.79	1.93	1.35	2.61	2.05	3.86	2.59	1.85	2.17	3.45
Polybia quadricincta	Asa_Wright_3	W	1.78	1.85	1.33	2.57	2.04	3.71	2.36	1.73	2.25	3.36
Polybia quadricincta	Asa_Wright_3	W	1.78	1.89	1.41	2.61	1.97	3.84	2.6	1.83	2.33	3.38
Polybia quadricincta	Asa_Wright_3	W	1.77	1.83	1.35	2.67	1.99	3.96	2.62	1.79	2.32	3.34
Polybia quadricincta	Asa_Wright_3	W	1.85	1.86	1.24	2.6	1.96	3.92	2.65	1.81	2.2	3.37
Polybia quadricincta	Asa_Wright_3	W	1.83	1.87	1.26	2.6	1.98	3.95	2.58	1.8	2.09	3.48
Polybia quadricincta	Asa_Wright_3	W	1.86	1.94	1.26	2.56	2.13	3.84	2.43	1.84	2.07	3.38
Polybia quadricincta	Asa_Wright_3	W	1.87	1.88	1.32	2.66	2.13	3.88	2.63	1.9	2.26	3.41
Polybia quadricincta	Asa_Wright_3	W	1.88	1.86	1.22	2.38	2.15	3.96	2.64	1.95	2.26	3.46
Polybia quadricincta	Asa_Wright_3	W	1.95	1.94	1.32	2.63	2.09	4.01	2.67	1.86	2.11	3.49
Polybia quadricincta	Asa_Wright_3	W	1.96	1.96	1.26	2.61	2.08	3.95	2.68	1.82	2.31	3.49
Polybia quadricincta	Asa_Wright_3	W	1.92	1.93	1.34	2.68	2.07	3.95	2.66	1.88	2.22	3.49
Polybia quadricincta	Asa_Wright_3	W	1.89	1.92	1.32	2.7	2.09	4.03	2.71	1.85	2.22	3.46
Polybia quadricincta	Asa_Wright_3	W	1.88	1.96	1.32	2.66	2.12	4.13	2.72	1.87	2.28	3.51
Polybia quadricincta	Asa_Wright_3	W	1.83	1.96	1.28	2.61	1.92	3.97	2.63	1.76	2.1	2.42
Polybia quadricincta	Asa_Wright_3	W	1.76	1.82	1.26	2.54	2.02	3.69	2.45	1.67	2.18	3.18
Polybia quadricincta	Asa_Wright_3	W	1.89	1.94	1.34	2.54	1.97	3.97	2.66	1.8	2.19	3.4
Polybia quadricincta	Asa_Wright_3	W	1.73	1.9	1.32	2.56	1.91	3.95	2.65	1.74	2.14	3.44
Polybia quadricincta	Asa_Wright_3	W	1.93	1.95	1.31	2.61	2.12	3.98	2.68	1.88	2.23	3.33
Polybia quadricincta	Asa_Wright_3	W	1.89	1.92	1.34	2.64	2.15	4.01	2.71	1.82	2.21	3.39
Polybia quadricincta	Asa_Wright_3	W	1.81	1.9	1.31	2.6	2.03	4	2.69	1.84	2.13	3.34
Polybia quadricincta	Asa_Wright_3	W	1.94	1.96	1.41	2.69	2.13	3.97	2.68	1.85	2.15	3.46
Polybia quadricincta	Asa_Wright_3	W	1.83	1.85	1.33	2.56	2.12	3.9	2.65	1.87	2.27	3.35
Polybia quadricincta	Asa_Wright_3	W	1.87	1.94	1.33	2.63	1.98	4	2.62	1.86	2.1	3.45
Polybia quadricincta	Asa_Wright_3	W	1.88	1.9	1.3	2.6	1.92	4.02	2.7	1.76	2.22	3.42
Polybia quadricincta	Asa_Wright_3	W	1.83	1.9	1.32	2.66	2.02	3.92	2.74	1.85	2.49	3.41
Polybia quadricincta	Asa_Wright_3	W	1.81	1.9	1.35	2.69	2.13	4.02	2.73	1.91	2.2	3.48
Polybia quadricincta	Asa_Wright_3	W	1.85	1.91	1.23	2.6	2	3.95	2.7	1.79	2.28	3.51
Polybia quadricincta	Asa_Wright_3	W	1.81	1.9	1.36	2.58	1.93	3.92	2.67	1.86	2.35	3.34
Polybia quadricincta	Asa_Wright_3	W	1.7	1.91	1.38	2.66	1.9	3.92	2.65	1.7	2.36	3.46
Polybia quadricincta	Asa_Wright_3	W	1.63	1.88	1.34	2.62	1.96	3.97	2.62	1.73	2.18	3.4
Polybia quadricincta	Asa_Wright_3	W	1.77	1.82	1.33	2.61	1.93	3.88	2.44	1.63	2.17	3.35
Polybia quadricincta	Asa_Wright_3	W	1.78	1.87	1.39	2.69	1.89	3.91	2.51	1.76	2.02	3.28
Polybia quadricincta	Asa_Wright_3	W	1.73	1.87	1.33	2.54	1.95	3.87	2.61	1.66	2.06	3.39
Polybia quadricincta	Asa_Wright_3	W	1.84	1.9	1.27	2.47	2.07	3.94	2.62	1.86	2.38	3.39
Polybia quadricincta	Asa_Wright_3	W	1.89	1.91	1.32	2.53	2.09	3.95	2.59	1.85	2.08	3.42
Polybia quadricincta	Asa_Wright_3	W	1.91	1.86	1.37	2.62	2.08	4	2.58	1.72	2.32	3.4
Polybia quadricincta	Asa_Wright_3	W	1.75	1.91	1.28	2.52	2.04	3.89	2.61	1.72	2.33	3.43
Polybia quadricincta	Asa_Wright_3	W	1.73	1.88	1.3	2.64	1.89	3.81	2.51	1.69	2.22	3.35
Polybia quadricincta	Asa_Wright_3	W	1.9	1.9	1.37	2.61	2.07	4.04	2.57	1.67	2.05	3.39
Polybia quadricincta	Asa_Wright_3	W	1.89	1.95	1.36	2.6	2.1	4.07	2.65	1.88	2.16	3.44
Polybia quadricincta	Asa_Wright_3	W	1.83	1.84	1.33	2.73	1.92	3.8	2.56	1.67	2.16	3.15
Polybia quadricincta	Asa_Wright_3	W	1.79	1.94	1.32	2.54	2.13	3.94	2.62	1.75	2.26	3.39
Polybia quadricincta	Asa_Wright_3	W	1.73	1.87	1.35	2.55	1.87	3.61	2.56	1.75	2.12	3.33
Polybia quadricincta	Asa_Wright_3	W	1.87	1.87	1.32	2.5	2.05	3.96	2.53	1.87	1.86	3.34
Polybia quadricincta	Asa_Wright_3	W	1.86	1.91	1.41	2.58	2.01	4.03	2.58	1.78	2.03	3.45
Polybia quadricincta	Asa_Wright_3	W	1.85	1.9	1.38	2.64	2.13	4.04	2.52	1.9	2.21	3.39
Polybia quadricincta	Asa_Wright_3	W	1.83	1.9	1.29	2.5	1.95	3.96	2.56	1.66	2.03	3.24
Polybia quadricincta	Asa_Wright_3	W	1.85	1.89	1.37	2.57	2.05	4.03	2.53	1.72	2.11	3.29
Polybia quadricincta	Asa_Wright_3	W	1.85	1.9	1.25	2.54	1.9	4.05	2.56	1.69	2.07	3.41
Polybia quadricincta	Asa_Wright_3	W	1.8	1.89	1.33	2.57	1.85	3.77	2.6	1.77	2.14	3.27
Polybia quadricincta	Asa_Wright_3	W	1.82	1.91	1.3	2.54	1.86	3.86	2.68	1.82	2.2	3.31
Polybia quadricincta	Asa_Wright_3	W	1.77	1.87	1.29	2.44	1.95	3.88	2.51	1.68	1.84	3.36
Polybia quadricincta	Asa_Wright_3	W	1.67	1.87	1.29	2.49	2.02	3.92	2.53	1.79	2.07	3.36
Polybia quadricincta	Asa_Wright_3	W	1.83	1.83	1.32	2.53	1.9	3.93	2.64	1.79	2.43	3.24
Polybia quadricincta	Asa_Wright_3	W	1.81	1.85	1.33	2.59	1.96	3.88	2.53	1.78	2.03	3.24
Polybia quadricincta	Asa_Wright_3	W	1.82	1.89	1.36	2.63	1.85	3.95	2.49	1.71	2.16	3.37
Polybia quadricincta	Asa_Wright_3	W	1.85	1.9	1.32	2.68	2	3.99	2.48	1.79	2.08	3.32
Polybia quadricincta	Asa_Wright_3	W	1.87	1.86	1.29	2.52	1.85	3.93	2.52	1.73	1.98	3.33
Polybia quadricincta	Asa_Wright_3	W	1.85	1.94	1.35	2.68	2.02	4.05	2.62	1.79	2.15	3.38
Polybia quadricincta	Asa_Wright_3	W	1.85	1.86	1.24	2.36	1.89	3.86	2.52	1.68	1.9	3.38
Polybia quadricincta	Asa_Wright_3	W	1.86	1.86	1.31	2.48	1.97	3.91	2.54	1.74	2.02	3.27
Polybia quadricincta	Asa_Wright_3	W	1.74	1.78	1.3	2.55	1.89	3.73	2.46	1.77	2	3.11
Polybia quadricincta	Asa_Wright_3	W	1.79	1.86	1.29	2.5	1.85	3.71	2.55	1.79	2.06	3.27
Polybia quadricincta	Asa_Wright_3	W	1.86	1.86	1.3	2.59	1.84	3.84	2.5	1.77	2.12	3.32
Polybia quadricincta	Asa_Wright_3	W	1.82	1.79	1.27	2.51	1.71	3.65	2.32	1.69	1.87	3.21
Polybia quadricincta	Asa_Wright_3	W	1.95	1.91	1.33	2.53	1.96	3.87	2.53	1.86	2.04	3.33
Polybia quadricincta	Asa_Wright_3	W	1.84	1.9	1.29	2.55	1.88	3.95	2.5	1.71	1.99	3.3
Polybia quadricincta	Asa_Wright_3	W	1.81	1.82	1.27	2.44	1.91	3.75	2.43	1.75	1.9	3.21
Polybia quadricincta	Asa_Wright_3	W	1.77	1.84	1.28	2.55	1.85	3.8	2.39	1.69	2.1	3.28
Polybia quadricincta	Asa_Wright_3	W	1.78	1.86	1.3	2.53	1.85	3.61	2.45	1.64	1.82	3.2
Polybia quadricincta	Asa_Wright_3	W	1.8	1.84	1.33	2.56	2.02	3.9	2.66	1.82	2.2	3.32
Polybia quadricincta	Asa_Wright_3	W	1.91	1.89	1.29	2.6	1.91	3.86	2.48	1.81	1.9	3.37
Polybia quadricincta	Asa_Wright_3	W	1.79	1.9	1.3	2.55	1.98	3.95	2.51	1.79	1.94	3.25
Polybia quadricincta	Asa_Wright_3	Q	1.7	1.87	1.36	2.65	1.98	3.78	2.63	1.92	2.31	3.35
Polybia quadricincta	Asa_Wright_3	Q	1.86	1.85	1.27	2.62	2.14	3.95	2.59	1.89	2.24	3.36
Polybia quadricincta	Asa_Wright_3	Q	1.86	1.8	1.34	2.6	1.98	3.86	2.62	1.86	2.32	3.41
Polybia quadricincta	Asa_Wright_3	Q	1.86	1.96	1.46	2.69	2.04	3.88	2.58	1.86	2.14	3.34
Polybia quadricincta	Asa_Wright_3	Q	1.6	1.8	1.21	2.48	1.9	3.71	2.53	1.75	2.48	3.22
Polybia quadricincta	Asa_Wright_3	Q	1.63	1.87	1.24	2.47	1.99	3.69	2.55	1.71	2.16	3.25
Polybia quadricincta	Asa_Wright_3	Q	1.68	1.89	1.31	2.59	1.98	3.81	2.68	1.8	2.26	3.33
Polybia quadricincta	Asa_Wright_3	Q	1.95	1.93	1.38	2.7	2.12	3.83	2.64	2	2.34	3.44
Polybia quadricincta	Asa_Wright_3	Q	1.9	1.91	1.41	2.75	2.06	4	2.66	1.93	2.46	3.42
Polybia quadricincta	Asa_Wright_3	Q	1.91	1.94	1.32	2.68	2.04	3.81	2.64	1.87	2.3	3.38
Polybia quadricincta	Asa_Wright_3	Q	1.9	1.94	1.38	2.67	2.05	4.07	2.65	1.91	2.3	3.34
Polybia quadricincta	Asa_Wright_3	Q	1.88	1.86	1.23	2.57	2.03	3.74	2.52	1.77	2.22	3.41
Polybia quadricincta	Asa_Wright_3	Q	1.86	1.87	1.3	2.46	2.15	3.98	2.51	1.92	2.08	3.42
Polybia quadricincta	Asa_Wright_3	Q	1.75	1.9	1.33	2.66	1.96	3.93	2.59	1.82	2.04	3.37
Polybia quadricincta	Asa_Wright_3	Q	1.82	1.88	1.34	2.6	1.95	3.91	2.55	1.98	2.27	3.22
Polybia quadricincta	Asa_Wright_3	Q	1.92	1.89	1.32	2.68	1.99	4.01	2.52	1.81	1.98	3.35
Polybia quadricincta	Asa_Wright_3	Q	1.88	1.91	1.34	2.62	2.07	3.83	2.51	1.9	2.28	3.3
Polybia quadricincta	Asa_Wright_3	I	1.89	1.93	1.37	2.47	1.97	3.89	2.54	1.85	2.14	3.41
Polybia quadricincta	Asa_Wright_3	I	1.71	1.94	1.47	2.62	2.17	3.96	2.67	1.74	2.44	3.35
Polybia quadricincta	Asa_Wright_3	I	1.83	1.73	1.22	2.44	1.97	3.76	2.39	1.72	2.06	3.26
Polybia quadricincta	Asa_Wright_3	I	1.81	1.9	1.24	2.56	2.1	3.75	2.51	1.75	2.14	3.29
Polybia quadricincta	Asa_Wright_3	I	1.77	1.93	1.42	2.77	2	3.86	2.59	1.79	2.23	3.49
Polybia quadricincta	Asa_Wright_3	I	1.61	1.86	1.29	2.64	1.98	3.79	2.58	1.84	2.3	3.37
Polybia quadricincta	Asa_Wright_3	I	1.82	1.88	1.29	2.59	2.01	3.86	2.55	1.87	2.29	3.39
Polybia quadricincta	Asa_Wright_3	I	1.76	1.88	1.25	2.55	1.88	3.78	2.51	1.81	2.11	3.32

## Sheet: Polybia Statistics
		Mated? (%)		Ovary stage (%)					Caste (%)
Colony	Colony size	Y	N	A	B	C	D	E	Q	I	W
AW2	330	2.42	97.58	56.06	28.48	10	3.94	1.52	2.42	3.03	94.55
AW3	641	2.65	97.35	90.95	4.21	0.94	0.94	2.96	2.65	1.25	96.1
		Means ± SD (mm)			ANOVA		Ratios			LD1		LD2
Colony	Character	Queens	Intermediates	Workers	F	p	Q/W	Q/I	I/W	Standardised	Raw	Standardised	Raw
AW2		N = 8	N = 10	N = 100
	Head
	HL	2.24±0.04	2.26±0.03	2.23±0.04	1.56	0.22	1	0.99	1.01	-0.58	-14.03	-0.21	-5.12
	HW	2.59± 0.03	2.58± 0.02	2.57± 0.05	0.96	0.39	1.01	1	1	0.41	8.14	0.02	0.3
	MID	0.94±0.02	0.95±0.02	0.94±0.03	0.5	0.61	1	0.99	1	-0.14	-5.29	-0.11	-4.32
	Wing
	PWL	3.28±0.08	3.30±0.06	3.26±0.07	1.38	0.26	1.01	0.99	1.01	-0.49	-6.65	-0.18	-2.43
	Mesosoma
	MSL	1.83±0.04	1.84±0.06	1.81±0.06	1.98	0.14	1.01	0.99	1.02	-0.55	-9.23	0.36	6
	MSW	1.88±0.04	1.87±0.04	1.85±0.04	2.07	0.13	1.02	1.01	1.01	0.32	7.43	0.17	4.01
	MSH	2.55±0.06	2.55±0.10	2.51±0.07	2.37	0.1	1.02	1	1.02	0.28	3.66	0.65	8.53
	AL	3.87±0.08	3.81±0.08	3.80±0.10	1.87	0.16	1.02	1.02	1	0.68	7.19	-0.25	-2.63
	Metasoma
	T1L	1.75±0.08	1.75±0.06	1.72±0.08	1.01	0.37	1.02	1	1.02	-0.1	-1.27	0.36	4.67
	T2BW	1.32±0.04	1.31±0.04	1.29±0.04	2.31	0.1	1.02	1.01	1.02	0.56	13.1	0.66	15.41
	T2AW	2.57±0.06	2.59±0.09	2.54± 0.07	2.51	0.09	1.01	0.99	1.02	-0.78	-10.71	0.24	3.27
	T2L	1.95±0.07	1.92±0.07	1.90±0.07	1.46	0.24	1.03	1.02	1.01	0.6	8.18	-0.25	-3.38
	T2AH	2.10±0.11	2.13±0.12	2.10±0.12	0.56	0.58	1	0.99	1.01	-0.19	-1.6	-0.132	-1.11
AW3		N = 17	N = 8	N = 100
	Wing
	PWL	3.35±0.07	3.36±0.07	3.36±0.08	0.09	0.91	1	1	1	-0.03	-0.37	-0.54	-6.59
	Mesosoma
	MSL	1.82±0.11	1.78±0.09	1.82±0.07	1.44	0.24	1	1.02	0.98	-0.28	-3.83	0.57	7.66
	MSW	1.89±0.04	1.88±0.07	1.88±0.05	0.08	0.9	1.01	1.01	1	0.09	1.92	-0.39	-8.32
	MSH	2.59±0.06	2.54±0.08	2.57± 0.09	0.73	0.48	1.01	1.02	0.99	-0.61	-7.15	0.59	6.92
	AL	3.87±0.11	3.83±0.07	3.90±0.11	1.62	0.2	0.99	1.01	0.98	-0.32	-2.85	0.44	3.92
	Metasoma
	T1L	1.86±0.08	1.80±0.06	1.78±0.08	9.46	<0.01	1.04**	1.03	1.01	0.92	12.23	0.34	4.47
	T2BW	1.33±0.06	1.32±0.09	1.32±0.05	0.28	0.75	1.01	1.01	1	0.11	2.1	-0.4	-0.76
	T2AW	2.62±0.08	2.58±0.10	2.57± 0.09	2.12	0.13	1.02*	1.02	1	0.24	2.73	0.16	1.9
	T2L	2.03± 0.07	2.01±0.09	1.99±0.09	1.31	0.27	1.02	1.01	1.01	0.15	1.67	-0.32	-3.64
	T2AH	2.25±0.13	2.21±0.13	2.15±0.14	3.76	0.03	1.05*	1.02	1.03	0.35	2.5	-0.15	-1.07
	Asterisks denote significant differences between castes for the given morphological character (Tukey HSD post-hoc analysis, * = p<0.05, **=p<0.01).
Colony	Character	Wilks' Lambda	F	p
AW2
	Head
	HL	0.97	1.56	0.22
	HW	0.98	0.96	0.39
	MID	0.99	0.5	0.61
	Wing
	PWL	0.98	1.38	0.26
	Mesosoma
	MSL	0.97	1.98	0.143
	MSW	0.97	2.07	0.131
	MSH	0.96	2.37	0.1
	AL	0.97	1.87	0.16
	Metasoma
	T1L	0.98	1.01	0.366
	T2BW	0.96	2.31	0.1
	T2AW	0.96	2.51	0.09
	T2L	0.98	1.46	0.24
	T2AH	0.99	0.56	0.58
AW3
	Wing
	PWL	1	0.09	0.912
	Mesosoma
	MSL	0.98	1.44	0.24
	MSW	1	0.08	0.925
	MSH	0.99	0.73	0.48
	AL	0.97	1.62	0.2
	Metasoma
	T1L	0.87	9.46	<0.01
	T2BW	1	0.28	0.754
	T2AW	0.97	2.12	0.13
	T2L	0.98	1.31	0.27
	T2AH	0.94	3.76	0.03
	Eigenvalues
Colony	1	2
AW2	0.129 (58% of variance)	0.094 (42% of variance)
AW3	0.295 (83.4% of variance)	0.059 (16.6% of variance)
Colony	Observed caste		Predicted caste		Correctly classified individuals (%)
		Queen	Intermediate	Worker
AW2
	Queen	1	0	7	12.5
	Intermediate	0	1	9	10
	Worker	0	2	98	98
AW3
	Queen	5	0	12	29.41
	Intermediate	0	1	7	12.5
	Worker	3	2	95	95

## Sheet: Metapolybia morph data
Species	Nest ID	Caste	Head Width	Head Length	Mana Interorbital Distance	Min Interorbital Distance	Gena Width	Eye Width	Pronotal Width	Mesocutum Length	Mesoscutum Width	Mesoscutellar Length	Mesosomal Height	Alitrunk Length
Metapolybia cingulata	Nest1	Worker	2.33	1.849	1.51	0.99	0.309	0.507	1.75	1.106	1.395	0.366	1.899	2.696
Metapolybia cingulata	Nest1	Worker	2.286	1.811	1.678	0.937	0.418	0.596	1.681	1.598	1.348	0.405	2.121	3.541
Metapolybia cingulata	Nest1	Worker	2.296	1.778	1.634	0.985	0.418	0.554	1.929	1.098	1.368	0.304	1.816	3.082
Metapolybia cingulata	Nest1	Worker	2.254	1.635	1.426	1.007	0.36	0.841	1.66	1.044	1.321	0.357	1.995	3.172
Metapolybia cingulata	Nest1	Worker	2.299	1.902	1.518	0.903	0.426	0.419	1.782	1.102	1.345	0.317	2.143	3.161
Metapolybia cingulata	Nest1	Worker	2.237	1.864	1.751	0.849	0.446	0.651	1.766	1.297	1.361	0.28	2.15	3.003
Metapolybia cingulata	Nest1	Worker	2.259	1.622	1.74	0.83	0.464	0.58	1.903	0.915	1.371	0.206	2.137	3.038
Metapolybia cingulata	Nest1	Worker	2.206	1.722	1.716	0.899	0.279	0.511	2.097	1.009	1.319	0.342	1.849	2.699
Metapolybia cingulata	Nest1	Worker	2.268	1.836	1.407	0.981	0.298	0.669	1.642	1.04	1.263	0.219	1.764	2.974
Metapolybia cingulata	Nest1	Worker	2.288	1.713	1.662	1.003	0.287	0.588	1.936	0.945	1.235	0.221	1.997	2.773
Metapolybia cingulata	Nest1	Worker	2.279	1.799	1.582	0.974	0.377	0.529	1.697	1.233	1.404	0.495	1.855	2.613
Metapolybia cingulata	Nest1	Worker	2.272	1.724	1.601	0.89	0.541	0.539	1.766	1.105	1.511	0.342	1.936	3.088
Metapolybia cingulata	Nest1	Worker	2.234	1.774	1.674	0.99	0.289	0.585	1.618	1.051	1.114	0.291	2.061	3.121
Metapolybia cingulata	Nest1	Worker	2.295	1.761	1.785	0.893	0.419	0.505	1.752	1.04	1.399	0.267	2.011	2.961
Metapolybia cingulata	Nest1	Worker	2.268	1.883	1.707	0.897	0.25	0.589	1.821	1.078	1.229	0.385	1.899	3.041
Metapolybia cingulata	Nest1	Worker	2.263	2.079	1.61	0.985	0.421	0.517	1.655	1.202	1.18	0.343	1.816	2.984
Metapolybia cingulata	Nest1	Worker	2.211	1.77	1.617	0.975	0.57	0.646	1.908	1.08	1.317	0.253	1.866	2.863
Metapolybia cingulata	Nest1	Worker	2.191	1.849	1.793	0.94	0.348	0.552	1.687	1.047	1.318	0.397	1.882	2.477
Metapolybia cingulata	Nest1	Worker	2.266	1.765	1.628	1.007	0.387	0.431	1.801	1.048	1.414	0.473	1.948	3.121
Metapolybia cingulata	Nest2	Worker	2.281	1.842	1.699	0.894	0.415	0.573	1.846	1.322	1.469	0.434	1.961	3.023
Metapolybia cingulata	Nest2	Worker	2.292	2.02	1.618	1.004	0.381	0.425	1.806	1.29	1.46	0.377	1.753	2.737
Metapolybia cingulata	Nest2	Worker	2.266	1.926	1.616	0.937	0.326	0.558	1.806	1.12	1.252	0.343	1.901	2.976
Metapolybia cingulata	Nest2	Worker	2.284	1.998	1.636	1.004	0.469	0.545	1.831	0.858	1.416	0.348	1.843	3.033
Metapolybia cingulata	Nest2	Worker	2.298	1.827	1.734	0.906	0.36	0.502	1.695	1.035	1.398	0.36	1.946	3.055
Metapolybia cingulata	Nest2	Worker	2.315	1.943	1.983	1.008	0.358	0.469	1.878	1.211	1.502	0.308	1.905	3.049
Metapolybia cingulata	Nest2	Worker	2.294	1.924	1.618	0.989	0.396	0.487	1.852	1.331	1.286	0.266	2.118	3.344
Metapolybia cingulata	Nest2	Worker	2.204	1.976	1.357	1.006	0.369	0.511	1.657	1.14	1.148	0.267	1.818	3.148
Metapolybia cingulata	Nest2	Worker	2.255	1.811	1.605	0.984	0.338	0.538	1.714	1.135	1.33	0.317	1.923	2.881
Metapolybia cingulata	Nest2	Worker	2.249	1.815	1.96	0.806	0.348	0.578	1.702	1.097	1.469	0.294	2.005	3.015
Metapolybia cingulata	Nest2	Worker	2.264	1.8	1.577	0.938	0.383	0.629	1.712	1.218	1.23	0.295	2.239	3.334
Metapolybia cingulata	Nest2	Worker	2.303	1.721	1.671	0.988	0.445	0.602	1.792	1.385	1.406	0.246	1.89	3.609
Metapolybia cingulata	Nest2	Worker	2.27	1.939	1.751	0.879	0.37	0.548	1.755	1.107	1.386	0.36	2.297	2.965
Metapolybia cingulata	Nest2	Worker	2.229	1.814	1.736	0.821	0.381	0.539	2.024	1.105	1.439	0.369	1.866	2.969
Metapolybia cingulata	Nest2	Worker	2.295	1.965	1.711	0.795	0.351	0.53	1.822	1.122	1.474	0.323	1.808	2.948
Metapolybia cingulata	Nest2	Worker	2.215	1.983	1.537	0.901	0.414	0.517	1.776	1.5	1.393	0.297	1.903	2.887
Metapolybia cingulata	Nest2	Worker	2.243	1.729	1.659	1.004	0.396	0.493	1.601	1.154	1.29	0.313	1.943	3.076
Metapolybia cingulata	Nest2013014	Worker	na	na	na	na	na	na	1.77	1.244	1.49	0.32	2.117	3.6
Metapolybia cingulata	Nest2013014	Worker	na	na	na	na	na	na	1.526	1.01	1.192	0.334	2.131	3.565
Metapolybia cingulata	Nest2013014	Worker	na	na	na	na	na	na	1.633	1.29	1.39	0.312	1.996	2.975
Metapolybia cingulata	Nest2013014	Worker	na	na	na	na	na	na	1.756	1.31	1.526	0.398	2.148	2.838
Metapolybia cingulata	Nest2013014	Worker	na	na	na	na	na	na	1.667	1.095	1.428	0.386	2.013	3.119
Metapolybia cingulata	Nest2013014	Worker	na	na	na	na	na	na	1.594	1.307	1.403	0.347	1.936	3.09
Metapolybia cingulata	Nest2013014	Worker	na	na	na	na	na	na	1.594	1.006	1.398	0.322	1.898	3.05
Metapolybia cingulata	Nest2013014	Worker	na	na	na	na	na	na	1.668	0.916	1.345	0.342	2.081	3.091
Metapolybia cingulata	Nest2013014	Worker	na	na	na	na	na	na	1.724	1.035	1.283	0.388	1.894	3.41
Metapolybia cingulata	Nest2013014	Worker	na	na	na	na	na	na	1.705	1.011	1.253	0.385	2.231	3.56
Metapolybia cingulata	Nest2013014	Worker	na	na	na	na	na	na	1.822	1.286	1.403	0.372	2.041	3.649
Metapolybia cingulata	Nest2013014	Worker	na	na	na	na	na	na	1.53	1.117	1.333	0.36	1.936	3.005
Metapolybia cingulata	Nest2013014	Worker	na	na	na	na	na	na	1.655	1.139	1.438	0.458	2.114	3.228
Metapolybia cingulata	Nest2013014	Worker	na	na	na	na	na	na	1.512	1.117	1.301	0.403	1.936	3.549
Metapolybia cingulata	Nest2013014	Worker	na	na	na	na	na	na	1.513	1.219	1.333	0.453	2.158	3.598
Metapolybia cingulata	Nest2013014	Worker	na	na	na	na	na	na	1.724	1.284	1.439	0.36	1.974	3.48
Metapolybia cingulata	Nest2013014	Worker	na	na	na	na	na	na	1.588	1.321	1.262	0.345	1.883	2.959
Metapolybia cingulata	Nest2013014	Worker	na	na	na	na	na	na	1.552	1.192	1.282	0.374	2.077	3.199
Metapolybia cingulata	Nest2013015	Worker	na	na	na	na	na	na	1.678	1.22	1.374	0.349	2.18	3.14
Metapolybia cingulata	Nest2013015	Worker	na	na	na	na	na	na	1.673	1.277	1.48	0.423	2.255	3.563
Metapolybia cingulata	Nest2013015	Worker	na	na	na	na	na	na	1.621	1.19	1.365	0.414	2.092	3.143
Metapolybia cingulata	Nest2013015	Worker	na	na	na	na	na	na	1.643	1.281	1.3	0.415	2.166	3.36
Metapolybia cingulata	Nest2013015	Worker	na	na	na	na	na	na	1.655	1.421	1.365	0.398	2.282	3.507
Metapolybia cingulata	Nest2013015	Worker	na	na	na	na	na	na	1.645	1.209	1.351	0.446	2.167	3.496
Metapolybia cingulata	Nest2013015	Worker	na	na	na	na	na	na	1.655	1.403	1.49	0.388	2.279	3.513
Metapolybia cingulata	Nest2013015	Worker	na	na	na	na	na	na	1.552	1.111	1.385	0.449	2.167	3.515
Metapolybia cingulata	Nest2013015	Worker	na	na	na	na	na	na	1.554	1.303	1.279	0.467	2.103	3.312
Metapolybia cingulata	Nest2013015	Worker	na	na	na	na	na	na	1.533	1.034	1.32	0.519	2.333	3.244
Metapolybia cingulata	Nest2013015	Worker	na	na	na	na	na	na	1.631	1.147	1.401	0.45	2.053	3.173
Metapolybia cingulata	Nest2013015	Worker	na	na	na	na	na	na	1.596	1.018	1.27	0.39	1.967	3.146
Metapolybia cingulata	Nest2013015	Worker	na	na	na	na	na	na	1.756	1.39	1.641	0.308	2.205	3.307
Metapolybia cingulata	Nest2013015	Worker	na	na	na	na	na	na	1.663	1.292	1.288	0.448	2.001	3.037
Metapolybia cingulata	Nest2013015	Worker	na	na	na	na	na	na	1.551	1.331	1.27	0.45	2.282	2.984
Metapolybia cingulata	Nest2013015	Worker	na	na	na	na	na	na	1.414	1.281	1.146	0.483	2.008	3.141
Metapolybia cingulata	Nest2013015	Worker	na	na	na	na	na	na	1.73	1.194	1.4	0.399	2.172	3.442
Metapolybia cingulata	Nest2013015	Worker	na	na	na	na	na	na	1.646	1.141	1.457	0.372	2.177	3.418
Metapolybia cingulata	Nest2013015	Worker	na	na	na	na	na	na	2.026	1.455	1.693	0.347	2.218	3.289
Metapolybia cingulata	Nest2013016	Worker	na	na	na	na	na	na	1.72	1.061	1.512	0.432	1.874	2.935
Metapolybia cingulata	Nest2013016	Worker	na	na	na	na	na	na	1.749	1.259	1.545	0.38	2.065	3.572
Metapolybia cingulata	Nest2013016	Worker	na	na	na	na	na	na	1.788	1.745	1.599	0.348	2.004	3.438
Metapolybia cingulata	Nest2013016	Worker	na	na	na	na	na	na	1.821	1.202	1.398	0.143	1.996	3.389
Metapolybia cingulata	Nest2013016	Worker	na	na	na	na	na	na	1.411	1.386	1.213	0.407	2.056	3.424
Metapolybia cingulata	Nest2013016	Worker	na	na	na	na	na	na	1.66	1.37	1.215	0.345	2.142	3.519
Metapolybia cingulata	Nest2013016	Worker	na	na	na	na	na	na	1.643	0.992	1.309	0.568	2.119	3.185
Metapolybia cingulata	Nest2013016	Worker	na	na	na	na	na	na	1.692	1.4	1.488	0.407	2.161	3.625
Metapolybia cingulata	Nest2013016	Worker	na	na	na	na	na	na	1.743	1.249	1.458	0.431	1.937	2.918
Metapolybia cingulata	Nest2013016	Worker	na	na	na	na	na	na	1.566	1.044	1.188	0.398	2.064	3.165
Metapolybia cingulata	Nest2013040	Worker	na	na	na	na	na	na	1.722	1.197	1.374	0.341	2.086	3.205
Metapolybia cingulata	Nest2013040	Worker	na	na	na	na	na	na	1.913	1.331	1.436	0.397	1.981	3.67
Metapolybia cingulata	Nest2013040	Worker	na	na	na	na	na	na	1.532	1.26	1.236	0.423	2.053	3.09
Metapolybia cingulata	Nest2013040	Worker	na	na	na	na	na	na	1.81	1.132	1.582	0.442	2.03	3.522
Metapolybia cingulata	Nest2013040	Worker	na	na	na	na	na	na	1.625	1.401	1.201	0.382	2.042	3.42
Metapolybia cingulata	Nest2013040	Worker	na	na	na	na	na	na	1.578	1.247	1.451	0.438	2.126	3.142
Metapolybia cingulata	Nest2013040	Worker	na	na	na	na	na	na	1.752	1.18	1.473	0.389	2	2.923
Metapolybia cingulata	Nest2013040	Worker	na	na	na	na	na	na	1.717	1.207	1.531	0.327	2.051	3.551
Metapolybia cingulata	Nest2013040	Worker	na	na	na	na	na	na	1.663	1.265	1.476	0.353	2.084	3.502
Metapolybia cingulata	Nest2013040	Worker	na	na	na	na	na	na	1.712	1.225	1.476	0.401	2.119	3.196
Metapolybia cingulata	Nest2013040	Worker	na	na	na	na	na	na	1.592	1.245	1.302	0.375	2.065	3.126
Metapolybia cingulata	Nest2013040	Worker	na	na	na	na	na	na	1.808	1.288	1.347	0.41	1.981	3.25
Metapolybia cingulata	Nest2013040	Worker	na	na	na	na	na	na	1.54	1.192	1.314	0.386	1.921	2.953
Metapolybia cingulata	Nest2013040	Worker	na	na	na	na	na	na	1.618	1.25	1.4	0.389	2.097	3.104
Metapolybia cingulata	Nest3	Worker	2.32	1.734	1.78	1.008	0.296	0.42	1.757	1.228	1.473	0.397	2.128	3.01
Metapolybia cingulata	Nest3	Worker	2.225	1.816	1.709	0.796	0.49	0.477	1.681	1.263	1.454	0.478	2.097	3.4
Metapolybia cingulata	Nest3	Worker	2.323	1.725	1.63	0.848	0.386	0.516	1.69	1.018	1.396	0.468	2.15	3.566
Metapolybia cingulata	Nest3	Worker	2.269	1.765	1.684	0.932	0.33	0.607	1.622	1.2	1.374	0.384	1.988	3.105
Metapolybia cingulata	Nest3	Worker	2.241	1.711	1.793	0.89	0.384	0.616	1.768	1.185	1.521	0.379	2.118	2.965
Metapolybia cingulata	Nest3	Worker	2.35	1.605	1.553	0.874	0.359	0.563	1.734	1.262	1.455	0.502	1.891	2.859
Metapolybia cingulata	Nest3	Worker	2.352	1.798	1.569	0.935	0.4	0.554	1.884	1.163	1.418	0.413	2.122	2.825
Metapolybia cingulata	Nest3	Worker	2.297	1.851	1.586	0.983	0.404	0.609	1.842	1.32	1.544	0.448	2.138	3.658
Metapolybia cingulata	Nest3	Worker	2.294	1.734	1.626	1.002	0.409	0.555	1.752	1.035	1.411	0.451	2.167	3.542
Metapolybia cingulata	Nest3	Worker	2.298	1.763	1.636	1.003	0.394	0.531	1.732	1.171	1.456	0.336	2.061	2.994
Metapolybia cingulata	Nest3	Worker	2.3	1.967	1.788	0.794	0.339	0.737	1.863	1.091	1.485	0.434	2.156	2.836
Metapolybia cingulata	Nest3	Worker	2.209	1.799	1.597	0.893	0.372	0.483	1.765	1.061	1.47	0.322	2.127	2.92
Metapolybia cingulata	Nest3	Worker	2.251	1.709	1.766	0.846	0.45	0.62	1.815	0.977	1.475	0.417	2.056	2.938
Metapolybia cingulata	Nest3	Worker	2.269	1.813	1.756	0.93	0.335	0.646	1.747	1.061	1.524	0.519	2.145	3.013
Metapolybia cingulata	Nest3	Worker	2.323	1.672	1.646	0.794	0.336	0.618	1.635	1.033	1.408	0.369	2.015	2.831
Metapolybia cingulata	Nest3	Worker	2.314	1.864	1.469	0.993	0.404	0.529	1.663	1.236	1.383	0.43	2.171	3.592
Metapolybia cingulata	Nest3	Worker	2.392	1.816	1.702	0.92	0.375	0.5	1.787	1.215	1.441	0.348	2.081	2.904
Metapolybia cingulata	Nest3	Worker	2.384	1.735	1.984	0.801	0.424	0.55	2.035	1.152	1.507	0.375	2.192	3.012
Metapolybia cingulata	Nest3	Worker	2.372	1.765	1.674	0.936	0.375	0.502	1.731	0.99	1.506	0.387	2.15	2.827
Metapolybia cingulata	Nest3	Worker	2.355	1.644	1.754	1.002	0.341	0.639	1.874	0.77	1.52	0.489	2.213	3.029
Metapolybia cingulata	Nest4	Worker	2.229	1.714	1.604	0.789	0.321	0.548	1.671	1.165	1.337	0.15	2.116	3.175
Metapolybia cingulata	Nest4	Worker	2.286	1.654	1.612	0.995	0.313	0.602	1.666	1.109	1.446	0.25	1.803	2.621
Metapolybia cingulata	Nest4	Worker	2.357	1.726	1.791	0.791	0.424	0.522	1.666	1.12	1.506	0.371	2.065	2.899
Metapolybia cingulata	Nest4	Worker	2.242	1.689	1.612	0.955	0.338	0.601	1.69	1.211	1.448	0.398	1.986	2.895
Metapolybia cingulata	Nest4	Worker	2.338	1.715	1.801	1.006	0.281	0.594	1.804	1.077	1.554	0.263	1.998	2.978
Metapolybia cingulata	Nest4	Worker	2.304	1.764	1.753	0.796	0.326	0.516	1.891	1.243	1.415	0.388	1.978	3.088
Metapolybia cingulata	Nest4	Worker	2.388	1.714	1.655	0.94	0.356	0.554	1.721	1.235	1.452	0.39	2.128	3.078
Metapolybia cingulata	Nest4	Worker	2.281	1.756	1.766	1.01	0.37	0.431	1.668	1.28	1.306	0.456	1.962	3.55
Metapolybia cingulata	Nest4	Worker	2.209	1.756	1.557	0.927	0.328	0.47	1.631	1.188	1.374	0.238	1.987	3.131
Metapolybia cingulata	Nest4	Worker	2.373	1.723	1.771	1.005	0.275	0.61	1.74	1.26	1.442	0.326	2.108	3.238
Metapolybia cingulata	Nest4	Worker	2.231	1.745	1.562	0.937	0.319	0.6	1.601	1.329	1.262	0.404	2.23	2.899
Metapolybia cingulata	Nest4	Worker	2.327	1.735	1.785	0.847	0.344	0.55	1.701	1.102	1.342	0.253	2.097	3.266
Metapolybia cingulata	Nest4	Worker	2.366	1.676	1.729	0.794	0.328	0.499	1.803	1.277	1.517	0.313	2.023	3
Metapolybia cingulata	Nest4	Worker	2.313	1.789	1.778	0.994	0.298	0.523	1.725	1.235	1.445	0.396	1.888	3.099
Metapolybia cingulata	Nest4	Worker	2.33	1.733	1.781	1.004	0.4	0.519	1.747	1.24	1.418	0.4	2.08	3.132
Metapolybia cingulata	Nest4	Worker	2.376	1.683	1.714	0.935	0.329	0.627	1.752	1.186	1.404	0.216	2.05	3.251
Metapolybia cingulata	Nest4	Worker	2.354	1.739	1.567	0.978	0.344	0.523	1.766	1.027	1.542	0.226	2.141	2.99
Metapolybia cingulata	Nest4	Worker	2.281	1.674	1.668	1.009	0.323	0.428	1.738	1.027	1.2	0.314	2.012	3.883
Metapolybia cingulata	Nest4	Worker	2.308	1.96	1.731	1.004	0.297	0.649	1.667	1.261	1.278	0.351	1.977	2.869
Metapolybia cingulata	Nest5	Worker	2.083	1.702	1.526	0.92	0.298	0.484	1.465	0.864	1.164	0.266	1.758	2.997
Metapolybia cingulata	Nest5	Worker	2.196	1.604	1.433	0.893	0.315	0.489	1.568	1.079	1.349	0.326	1.968	3.315
Metapolybia cingulata	Nest5	Worker	2.039	1.809	1.612	1.009	0.275	0.57	1.457	0.902	1.127	0.326	1.893	2.663
Metapolybia cingulata	Nest5	Worker	2.081	1.744	1.783	0.935	0.344	0.474	1.498	0.852	1.254	0.289	1.849	2.399
Metapolybia cingulata	Nest5	Worker	2.185	1.785	1.525	0.852	0.29	0.447	1.265	1.144	0.975	0.314	1.853	2.62
Metapolybia cingulata	Nest5	Worker	2.132	1.698	1.688	0.972	0.239	0.453	1.695	0.966	1.444	0.288	1.834	2.677
Metapolybia cingulata	Nest5	Worker	2.186	1.746	1.853	1.003	0.359	0.501	1.559	1.022	1.332	0.268	1.934	2.612
Metapolybia cingulata	Nest5	Worker	1.985	1.785	1.594	0.852	0.29	0.447	1.265	1.144	0.975	0.314	1.853	2.62
Metapolybia cingulata	Nest5	Worker	2.132	1.698	1.617	0.799	0.239	0.453	1.695	0.966	1.444	0.288	1.834	2.677
Metapolybia cingulata	Nest5	Worker	2.186	1.746	1.782	0.92	0.359	0.501	1.559	1.022	1.332	0.268	1.934	2.612
Metapolybia cingulata	Nest1	Queen	2.18	1.96	1.779	0.93	0.363	0.555	1.634	1.233	1.495	0.432	2.005	3.355
Metapolybia cingulata	Nest2	Queen	2.238	1.98	1.597	0.95	0.365	0.345	1.698	1.262	1.343	0.241	1.6	3.121
Metapolybia cingulata	Nest2013014	Queen	na	na	na	na	na	na	1.545	1.128	1.318	0.393	1.925	2.91
Metapolybia cingulata	Nest2013015	Queen	na	na	na	na	na	na	1.602	1.22	1.323	0.403	2.003	3.515
Metapolybia cingulata	Nest2013015	Queen	na	na	na	na	na	na	1.753	1.155	1.465	0.464	2.031	3.208
Metapolybia cingulata	Nest2013015	Queen	na	na	na	na	na	na	1.668	1.206	1.518	0.41	2.06	3.211
Metapolybia cingulata	Nest2013015	Queen	na	na	na	na	na	na	1.614	1.255	1.371	0.401	2.16	3.715
Metapolybia cingulata	Nest2013040	Queen	na	na	na	na	na	na	1.588	1.105	1.342	0.345	1.95	3.54
Metapolybia cingulata	Nest2013040	Queen	na	na	na	na	na	na	1.603	1.236	1.423	0.401	2.104	3.45
Metapolybia cingulata	Nest3	Queen	2.264	1.882	1.796	0.98	0.35	0.7	1.73	1.101	1.495	0.383	2.091	3.282
Metapolybia cingulata	Nest3	Queen	2.108	1.958	1.778	0.897	0.417	0.567	1.751	0.979	1.522	0.408	2.054	2.862
Metapolybia cingulata	Nest3	Queen	2.382	1.839	1.759	0.93	0.461	0.463	1.925	1.256	1.575	0.328	2.178	3.146
Metapolybia cingulata	Nest3	Queen	2.218	1.977	1.812	0.87	0.405	0.627	1.876	1.432	1.647	0.433	2.273	3.177
Metapolybia cingulata	Nest3	Queen	2.218	1.687	1.846	0.944	0.364	0.566	1.913	1.132	1.649	0.458	2.246	3.063
Metapolybia cingulata	Nest3	Queen	2.335	1.943	1.82	0.85	0.404	0.566	1.834	1.373	1.605	0.487	2.28	3.257
Metapolybia cingulata	Nest3	Queen	2.134	1.792	1.562	0.95	0.446	0.396	1.871	1.471	1.616	0.432	2.148	3.306
Metapolybia cingulata	Nest3	Queen	2.34	1.774	1.78	0.964	0.325	0.572	1.808	1.315	1.616	0.377	2.145	3.229
Metapolybia cingulata	Nest3	Queen	2.228	1.967	1.687	0.89	0.392	0.682	1.851	1.252	1.561	0.41	2.177	3.224
Metapolybia cingulata	Nest3	Queen	2.47	1.823	1.505	0.99	0.426	0.643	1.872	1.362	1.617	0.297	2.234	2.913
Metapolybia cingulata	Nest3	Queen	2.289	1.799	1.509	0.87	0.378	0.606	1.74	1.294	1.537	0.324	2.21	2.988
Metapolybia cingulata	Nest3	Queen	2.384	1.769	1.563	0.932	0.305	0.592	1.761	1.092	1.519	0.368	1.987	3.114
Metapolybia cingulata	Nest3	Queen	2.278	1.854	1.684	0.837	0.445	0.608	1.874	1.202	1.536	0.444	2.253	3.299
Metapolybia cingulata	Nest3	Queen	2.305	1.784	1.599	0.89	0.349	0.607	1.667	1.107	1.437	0.407	2.087	3.599
Metapolybia cingulata	Nest3	Queen	2.331	1.854	1.715	0.923	0.434	0.591	1.767	1.406	1.446	0.35	2.154	3.045
Metapolybia cingulata	Nest3	Queen	2.289	1.644	1.478	0.836	0.392	0.546	1.704	1.073	1.497	0.361	2.087	2.995
Metapolybia cingulata	Nest3	Queen	2.018	1.787	1.65	0.893	0.361	0.618	1.829	1.124	1.556	0.414	2.207	3.182
Metapolybia cingulata	Nest3	Queen	2.34	1.804	1.499	0.94	0.36	0.455	1.776	1.003	1.518	0.47	2.116	2.842
Metapolybia cingulata	Nest3	Queen	2.28	1.767	1.596	0.867	0.377	0.447	1.737	0.997	1.372	0.374	2.062	2.725
Metapolybia cingulata	Nest4	Queen	2.285	1.632	1.52	0.89	0.314	0.452	1.67	1.308	1.393	0.228	1.98	3.34
Metapolybia cingulata	Nest4	Queen	2.227	1.62	1.794	0.956	0.27	0.487	1.73	1.054	1.503	0.179	2.144	3.29
Metapolybia cingulata	Nest5	Queen	2.359	1.682	1.579	0.984	0.309	0.435	1.706	1.07	1.478	0.263	1.994	3.308

## Sheet: Metapolybia Statistics
Table S1: Mean lengths, ANOVA values and ratios between queen and worker phenotypes for morphological characteristics for Metapolybia cingulata
		Means ± SD		Anova		Ratio
Species	Character	Queens Workers		F P		Q/W
		N=25	N=146
	Head
	HL	1.81 ± 0.11	1.78 ± 0.09	1.71	0.19	1.01
	HW	2.27 ± 0.09	2.26 ± 0.07	0.02	0.88	1
Metapolybia cingulata	MID	0.91 ± 0.04	0.92 ± 0.07	0.64	0.42	0.98
	Mesosoma
	MSL	1.2 ± 0.13	1.17 ± 0.14	1.09	0.29	1.02
	MSW	1.49 ± 0.09	1.37 ± 0.11	25.9	<0.01	1.08*
	MSH	2.09 ± 0.13	2.03 ± 0.12	6.34	0.01	1.03*
	AL	3.2 ± 0.22	3.13 ± 0.28	1.59	0.2	1.02
Table S2: Discriminant morphometric variables between queens and workers based on linear discriminant analysis of Metapolybia cingulata.
Character	Wilks’ Lambda	F	p
Head
HL	0.984	1.717	0.193
HW	1	0.02	0.887
MID	0.994	0.64	0.425
Mesosoma
MSL	0.985	1.622	0.206
MSW	0.791	28.309	<0.01
MSH	0.959	4.55	0.035
AL	0.993	0.739	0.392
Table Metapolybia 3: Predictive value of morphological traits in caste classification in Metapolybia cingulata.
	Predicted caste
Observed caste	Queen	Worker	Correctly classified individuals (%)
Queen	11	13	45.8
Worker	3	79	94.04

## Sheet: Brachygastra morph data
Species	Caste	ID Number	MSW	MSL	AL	MSH	HL	HW	MID
Brachygastra mellifica	W	1213	1.957	1.89	3.22	2.756	2.09	2.38	0.87
Brachygastra mellifica	W	1226	1.955	1.971	3.089	2.875	2.084	2.412	0.923
Brachygastra mellifica	W	1250	1.85	1.798	3.209	2.684	2.089	2.37	0.83
Brachygastra mellifica	W	1278	1.853	1.984	3.271	2.834	2.124	2.42	0.889
Brachygastra mellifica	W	1294	1.976	1.792	3.071	2.604	2.095	2.36	0.904
Brachygastra mellifica	W	1309	2.012	1.881	3.095	2.83	2.122	2.4	0.929
Brachygastra mellifica	W	1310	2.051	1.829	3.193	2.871	2.076	2.39	0.894
Brachygastra mellifica	W	1315	2.062	1.9	3.227	2.624	2.093	2.38	0.883
Brachygastra mellifica	W	1321	1.958	1.89	3.281	2.617	2.11	2.45	0.905
Brachygastra mellifica	W	1324	2.04	1.791	3.193	2.893	2.125	2.44	0.846
Brachygastra mellifica	W	1326	2.057	1.97	3.264	2.781	2.085	2.31	0.933
Brachygastra mellifica	W	1332	1.987	1.865	3.3	2.697	2.073	2.302	0.892
Brachygastra mellifica	W	1360	2.053	1.989	3.279	2.693	2.094	2.33	0.85
Brachygastra mellifica	W	1361	1.993	1.799	3.05	2.801	2.085	2.36	0.932
Brachygastra mellifica	W	1364	2.081	1.998	3.058	2.73	2.102	2.46	0.964
Brachygastra mellifica	W	1369	1.969	1.88	3.29	2.785	2.09	2.37	0.938
Brachygastra mellifica	W	1372	2.023	1.867	3.189	2.8	2.128	2.407	0.892
Brachygastra mellifica	W	1416	2.013	1.934	3.205	2.691	2.137	2.443	0.934
Brachygastra mellifica	W	1429	2.015	1.959	3.09	2.892	2.093	2.35	0.891
Brachygastra mellifica	W	1434	1.976	1.768	3.256	2.698	2.124	2.37	0.904
Brachygastra mellifica	W	1452	1.982	1.952	3.03	2.845	2.11	2.366	0.943
Brachygastra mellifica	W	1457	1.949	1.759	3.162	2.659	2.094	2.298	0.932
Brachygastra mellifica	W	1461	2.039	1.87	3.205	2.846	2.097	2.31	0.899
Brachygastra mellifica	W	1478	2.013	1.897	3.191	2.683	2.094	2.305	0.946
Brachygastra mellifica	W	1482	2.001	1.794	3.197	2.734	2.131	2.312	0.912
Brachygastra mellifica	W	1496	2.041	1.846	3.296	2.791	2.095	2.299	0.935
Brachygastra mellifica	W	1498	1.994	2.01	3.068	2.891	2.124	2.347	0.896
Brachygastra mellifica	W	1503	2.006	1.785	3.3	2.681	2.137	2.38	0.926
Brachygastra mellifica	W	1514	2.034	1.9	3.139	2.69	2.13	2.43	0.94
Brachygastra mellifica	W	1519	2.055	1.962	3.29	2.841	2.125	2.299	0.905
Brachygastra mellifica	W	1532	1.969	1.785	3.004	2.687	2.097	2.194	0.893
Brachygastra mellifica	W	1536	1.997	1.834	3.237	2.801	2.105	2.247	0.847
Brachygastra mellifica	W	1545	2.013	1.89	3.062	2.87	2.121	2.309	0.911
Brachygastra mellifica	W	1551	2.047	1.964	3.238	2.697	2.13	2.33	0.927
Brachygastra mellifica	W	1555	2.056	1.91	3.144	2.701	2.098	2.25	0.885
Brachygastra mellifica	W	1565	2.052	1.947	3.218	2.835	2.149	2.48	0.996
Brachygastra mellifica	W	2019	2.047	1.76	3.044	2.617	2.11	2.2	0.958
Brachygastra mellifica	W	2020	2.06	1.968	3.033	2.898	2.089	2.196	0.936
Brachygastra mellifica	W	2022	2.01	1.931	3.085	2.651	2.094	2.224	0.991
Brachygastra mellifica	W	2031	1.909	1.857	3.174	2.808	2.087	2.217	0.892
Brachygastra mellifica	W	2047	1.98	1.961	3.18	2.846	2.098	2.23	0.946
Brachygastra mellifica	W	2053	2.023	1.79	3.225	2.606	2.099	2.26	0.994
Brachygastra mellifica	W	2064	2.04	1.807	3.142	2.832	2.113	2.35	0.935
Brachygastra mellifica	W	2073	1.92	1.839	3.064	2.756	2.096	2.21	0.904
Brachygastra mellifica	W	2084	1.997	1.892	3.267	2.84	2.12	2.36	0.946
Brachygastra mellifica	W	2095	2.032	1.78	3.173	2.687	2.128	2.331	0.895
Brachygastra mellifica	W	2096	2.052	1.994	3.138	2.691	2.087	2.29	0.933
Brachygastra mellifica	W	2110	1.092	1.899	3.16	2.81	2.116	2.289	0.937
Brachygastra mellifica	W	2118	2.057	1.959	3.292	2.657	2.136	2.37	0.898
Brachygastra mellifica	W	2122	1.987	1.816	3.049	2.885	2.098	2.19	0.848
Brachygastra mellifica	W	2135	2.047	1.783	3.057	2.613	2.094	2.204	0.846
Brachygastra mellifica	W	2146	2.038	1.916	3.14	2.864	2.13	2.429	0.936
Brachygastra mellifica	W	2148	2.04	1.826	3.084	2.81	2.095	2.37	0.994
Brachygastra mellifica	W	2170	2.083	1.787	3.174	2.753	2.097	2.313	0.837
Brachygastra mellifica	W	2191	2.054	1.84	3.028	2.804	2.13	2.43	0.827
Brachygastra mellifica	W	2203	2.048	1.729	3.018	2.791	2.105	2.398	0.901
Brachygastra mellifica	W	2223	2.093	1.808	3.229	2.86	2.14	2.4	0.933
Brachygastra mellifica	W	2246	2.058	1.93	3.103	2.867	2.133	2.34	0.957
Brachygastra mellifica	W	2267	2.047	1.81	3.067	2.768	2.102	2.229	0.899
Brachygastra mellifica	W	2268	1.997	1.99	3.145	2.661	2.137	2.38	0.873
Brachygastra mellifica	W	2270	1.937	1.935	3.116	2.823	2.126	2.305	0.893
Brachygastra mellifica	W	2275	2.057	1.809	3.15	2.812	2.094	2.32	0.908
Brachygastra mellifica	W	2277	2.061	1.746	3.014	2.881	2.045	2.38	0.894
Brachygastra mellifica	W	2279	2.045	2.01	3.166	2.781	2.113	2.47	0.943
Brachygastra mellifica	W	2284	2.031	1.824	3.168	2.718	2.109	2.39	0.937
Brachygastra mellifica	W	2295	2.043	1.9	3.147	2.667	2.13	2.45	0.89
Brachygastra mellifica	W	2312	2.006	1.827	3.001	2.803	2.126	2.413	0.899
Brachygastra mellifica	W	2317	2.035	1.786	3.189	2.693	2.094	2.32	0.956
Brachygastra mellifica	W	2349	2.046	1.981	3.087	2.719	2.114	2.405	0.932
Brachygastra mellifica	W	2351	2.012	1.824	3.023	2.804	2.093	2.301	0.891
Brachygastra mellifica	W	2352	1.988	1.8	3.037	2.883	2.11	2.4	0.884
Brachygastra mellifica	W	2381	2.048	1.869	3.187	2.658	2.125	2.229	0.894
Brachygastra mellifica	W	2391	2.044	1.779	3.043	2.663	2.132	2.35	0.894
Brachygastra mellifica	W	3008	2.018	1.793	3.213	2.689	2.097	2.385	0.823
Brachygastra mellifica	W	3011	2.047	1.77	3.289	2.766	2.103	2.411	0.845
Brachygastra mellifica	W	3014	2.058	1.847	3.289	2.713	2.117	2.35	0.886
Brachygastra mellifica	W	3019	2.043	1.895	3.33	2.715	2.126	2.36	0.873
Brachygastra mellifica	W	3026	2.058	1.955	3.017	2.817	2.142	2.401	0.927
Brachygastra mellifica	W	3028	1.997	1.877	3.271	2.761	2.139	2.229	0.946
Brachygastra mellifica	W	3029	2.057	1.959	3.124	2.669	2.144	2.375	0.904
Brachygastra mellifica	W	3030	2.07	1.879	3.24	2.681	2.135	2.34	0.893
Brachygastra mellifica	W	3031	2.078	1.78	3.196	2.87	2.19	2.39	0.907
Brachygastra mellifica	W	3032	2.059	1.718	3.24	2.691	2.099	2.29	0.932
Brachygastra mellifica	W	3047	2.067	1.905	3.201	2.661	2.133	2.306	0.894
Brachygastra mellifica	W	3059	2.055	1.754	3.146	2.817	2.137	2.4	0.927
Brachygastra mellifica	W	3084	2.063	1.945	3.469	2.628	2.141	2.319	0.936
Brachygastra mellifica	W	3105	2.064	1.749	3.163	2.603	2.126	2.33	0.847
Brachygastra mellifica	W	3108	2.048	1.89	3.106	2.618	2.094	2.289	0.926
Brachygastra mellifica	W	3122	2.06	1.95	3.125	2.709	2.098	2.384	0.931
Brachygastra mellifica	W	3128	2.063	1.96	3.28	2.687	2.101	2.33	0.911
Brachygastra mellifica	W	3130	2.05	1.899	3.035	2.77	2.096	2.39	0.899
Brachygastra mellifica	W	3146	2.05	2.002	3.204	2.857	2.092	2.307	0.896
Brachygastra mellifica	W	3149	2.054	1.94	3.33	2.8	2.109	2.316	0.903
Brachygastra mellifica	W	3164	2.067	1.79	3.101	2.711	2.126	2.345	0.922
Brachygastra mellifica	W	3171	2.043	1.988	3.083	2.762	2.138	2.299	0.937
Brachygastra mellifica	W	3180	2.046	1.87	3.259	2.657	2.13	2.301	0.899
Brachygastra mellifica	W	3182	2.069	1.89	3.101	2.765	2.137	2.4	0.906
Brachygastra mellifica	W	3188	2.072	1.87	3.13	2.785	2.094	2.275	0.913
Brachygastra mellifica	W	3193	2.048	1.784	3.077	2.69	2.114	2.403	0.925
Brachygastra mellifica	W	3203	2.059	2.016	3.183	2.734	2.12	2.412	0.933
Brachygastra mellifica	W	3217	2.046	1.83	3.015	2.711	2.125	2.39	0.929
Brachygastra mellifica	W	3263	2.051	1.94	3.16	2.81	2.129	2.304	0.896
Brachygastra mellifica	W	3316	2.058	1.785	3.219	2.671	2.118	2.33	0.933
Brachygastra mellifica	W	3332	2.043	1.965	3.048	2.683	2.136	2.358	0.894
Brachygastra mellifica	W	3366	2.05	1.92	3.229	2.821	2.132	2.371	0.89
Brachygastra mellifica	W	3367	2.06	1.889	3.297	2.692	2.094	2.314	0.891
Brachygastra mellifica	W	3372	2.071	1.69	3.187	2.83	2.089	2.291	0.863
Brachygastra mellifica	W	3385	2.048	1.929	3.119	2.693	2.109	2.403	0.932
Brachygastra mellifica	W	3388	2.037	1.869	3.329	2.802	2.112	2.299	0.924
Brachygastra mellifica	W	3391	2.048	1.769	3.154	2.677	2.095	2.305	0.826
Brachygastra mellifica	W	4001	2.051	1.758	3.178	2.691	2.089	2.33	0.937
Brachygastra mellifica	W	4004	2.015	1.89	3.136	2.833	2.133	2.384	0.865
Brachygastra mellifica	W	4026	2.023	1.756	3.087	2.79	2.114	2.38	0.906
Brachygastra mellifica	W	4049	2.034	1.854	3.187	2.609	2.128	2.477	0.922
Brachygastra mellifica	W	4076	2.021	1.999	3.146	2.778	2.153	2.45	0.937
Brachygastra mellifica	W	4129	2.061	1.98	3.031	2.618	2.1	2.229	0.892
Brachygastra mellifica	W	4130	1.997	1.841	3.181	2.695	2.128	2.23	0.874
Brachygastra mellifica	W	4132	2.018	1.94	3.289	2.88	2.136	2.304	0.895
Brachygastra mellifica	W	4151	2.039	1.765	3.17	2.871	2.084	2.279	0.794
Brachygastra mellifica	W	4155	2.028	1.952	3.09	2.74	2.139	2.244	0.87
Brachygastra mellifica	W	4160	2.046	1.991	3.135	2.693	2.134	2.316	0.839
Brachygastra mellifica	W	4175	2.03	1.96	3.197	2.884	2.139	2.35	0.904
Brachygastra mellifica	W	4176	2.021	2.013	3.001	2.791	2.099	2.297	0.975
Brachygastra mellifica	W	4188	2.037	1.982	3.145	2.698	2.127	2.39	0.948
Brachygastra mellifica	W	4197	2.036	1.909	3.259	2.84	2.094	2.289	0.899
Brachygastra mellifica	W	4201	2.024	1.79	3.239	2.778	2.108	2.335	0.917
Brachygastra mellifica	W	4205	2.053	1.953	3.241	2.801	2.148	2.412	0.924
Brachygastra mellifica	W	4209	2.054	1.86	3.181	2.745	2.139	2.4	0.899
Brachygastra mellifica	W	4212	2.041	1.941	3.25	2.835	2.157	2.305	0.906
Brachygastra mellifica	W	4214	2.051	1.997	3.141	2.68	2.107	2.364	0.983
Brachygastra mellifica	W	4229	2.032	1.947	3.167	2.795	2.113	2.337	0.946
Brachygastra mellifica	W	4235	2.026	1.897	3.304	2.74	2.094	2.308	0.978
Brachygastra mellifica	W	4244	2.031	1.867	3.051	2.802	2.103	2.394	0.938
Brachygastra mellifica	W	4245	2.022	1.745	3.223	2.793	2.118	2.41	0.899
Brachygastra mellifica	W	4251	1.997	1.84	3.307	2.694	2.129	2.402	0.895
Brachygastra mellifica	W	4257	2.025	1.894	3.265	2.609	2.122	2.395	0.903
Brachygastra mellifica	W	4273	2.026	1.609	3.141	2.718	2.084	2.29	0.9
Brachygastra mellifica	W	4276	2.018	1.967	3.195	2.81	2.142	2.348	0.948
Brachygastra mellifica	W	4298	2.039	2.015	3.119	2.712	2.138	2.394	0.896
Brachygastra mellifica	W	4299	1.969	1.984	3.183	2.65	2.135	2.335	0.85
Brachygastra mellifica	W	4314	1.927	1.994	3.17	2.784	2.099	2.291	0.863
Brachygastra mellifica	W	4315	2.029	1.95	3.154	2.803	2.084	2.283	0.873
Brachygastra mellifica	W	4322	2.042	1.99	3.059	2.78	2.081	2.276	0.937
Brachygastra mellifica	W	4325	2.017	1.846	3.287	2.636	2.087	2.229	0.85
Brachygastra mellifica	W	4331	1.993	1.743	3.05	2.857	2.075	2.29	0.889
Brachygastra mellifica	W	4336	2.01	1.95	3.33	2.68	2.099	2.301	0.903
Brachygastra mellifica	Q	1216	1.9	1.789	3.318	3.05	2.189	2.57	0.98
Brachygastra mellifica	Q	1380	1.98	1.98	3.304	2.891	2.2	2.512	1.002
Brachygastra mellifica	Q	1437	2.088	2.018	3.391	3.057	2.231	2.604	1.004
Brachygastra mellifica	Q	2165	1.977	1.977	3.266	2.973	2.185	2.489	0.975
Brachygastra mellifica	Q	2005	2.046	2.014	3.372	3.069	2.227	2.603	1
Brachygastra mellifica	Q	2398	2.03	2.03	3.301	3.002	2.224	2.509	1.003
Brachygastra mellifica	Q	3287	2.01	1.89	3.291	2.895	2.191	2.491	0.989
Brachygastra mellifica	Q	3266	1.983	1.983	3.204	2.902	2.18	2.49	1.001
Brachygastra mellifica	Q	3387	2.017	2.017	3.382	3.045	2.197	2.503	1.003
Brachygastra mellifica	Q	3400	1.789	1.789	3.265	3.09	2.201	2.521	0.987
Brachygastra mellifica	Q	4007	1.89	1.89	3.327	3.077	2.218	2.617	0.99
Brachygastra mellifica	Q	4034	2.023	2.023	3.33	3.049	1.983	2.498	0.983
Brachygastra mellifica	Q	4093	1.974	1.784	3.236	2.937	2.07	2.502	0.993
Brachygastra mellifica	Q	4134	1.912	1.912	3.315	2.925	2.229	2.503	1.01
Brachygastra mellifica	Q	4192	2.09	2.025	3.292	3.022	2.127	2.481	1.013
Brachygastra mellifica	Q	4221	1.894	1.894	3.326	3.035	2.22	2.5	0.995
Brachygastra mellifica	Q	4227	1.947	1.947	3.283	2.961	2.271	2.511	0.988
Brachygastra mellifica	Q	4250	1.95	1.95	3.232	3.021	1.989	2.508	0.985
Brachygastra mellifica	Q	4280	1.984	1.789	3.384	2.832	2.253	2.532	1.007
Brachygastra mellifica	Q	4374	1.92	1.92	3.313	2.976	2.24	2.513	1.006

## Sheet: Brachygastra Statistics
Table S1: Mean lengths, ANOVA values and ratios between queen and worker phenotypes for morphological characteristics for Brachygastra mellifica
		Means ± SD		Anova		Ratio
Species	Character	Queens Workers		F P		Q/W
		N=20	N=146
	Head
	HL	2.18 ± 0.080	2.11 ± 0.02	72.22	1.12081e-14	1.03
	HW	2.52 ± 0.041	2.33 ± 0.066	147.41	1.31148e-24	1.07
Brachygastra mellifica	MID	0.996 ± 0.011	0.91 ± 0.038	113.19	1.9664e-20	1.1
	Mesosoma
	MSL	1.93 ± 0.087	1.88 ± 0.085	6.74	0.0102679	1.02
	MSW	1.97 ±0.070	2.02 ± 0.087	322.21	1.51e-40	0.97
	MSH	2.99 ±0.073	2.75 ± 0.081	155.29	1.66521e-25	1.09
	AL	3.31 ± 0.051	3.17 ± 0.091	45.63	2.36011e-10	10.4
Table S2: Discriminant morphometric variables between queens and workers based on linear discriminant analysis of Brachygastra mellifica
Character	Wilks’ Lambda	F	p
HL	0.694246	72.2274	< 0.0001
HW	0.526643	147.406	< 0.0001
MID	0.591645	113.193	< 0.0001
MSW	0.337302	322.211	< 0.0001
MSL	0.960509	6.7428	0.0102679
AL	0.782307	45.6363	< 0.0001
MSH	0.513637	155.292	< 0.0001
Table Brachygastra 3: Predictive value of morphological traits in caste classification in Brachygastra mellifica
	Predicted caste
Observed caste	Queen	Worker	Correctly classified individuals (%)
Queen	20	0	1
Worker	0	146	1
Total	20	146	1
